# Supplementary material for: Trends in Healthcare Access in Japan during the First Wave of the COVID-19 Pandemic, up to June 2020
Source: MDPI journal article supplement (doi:10.3390/ijerph18063271), 2021-03-22

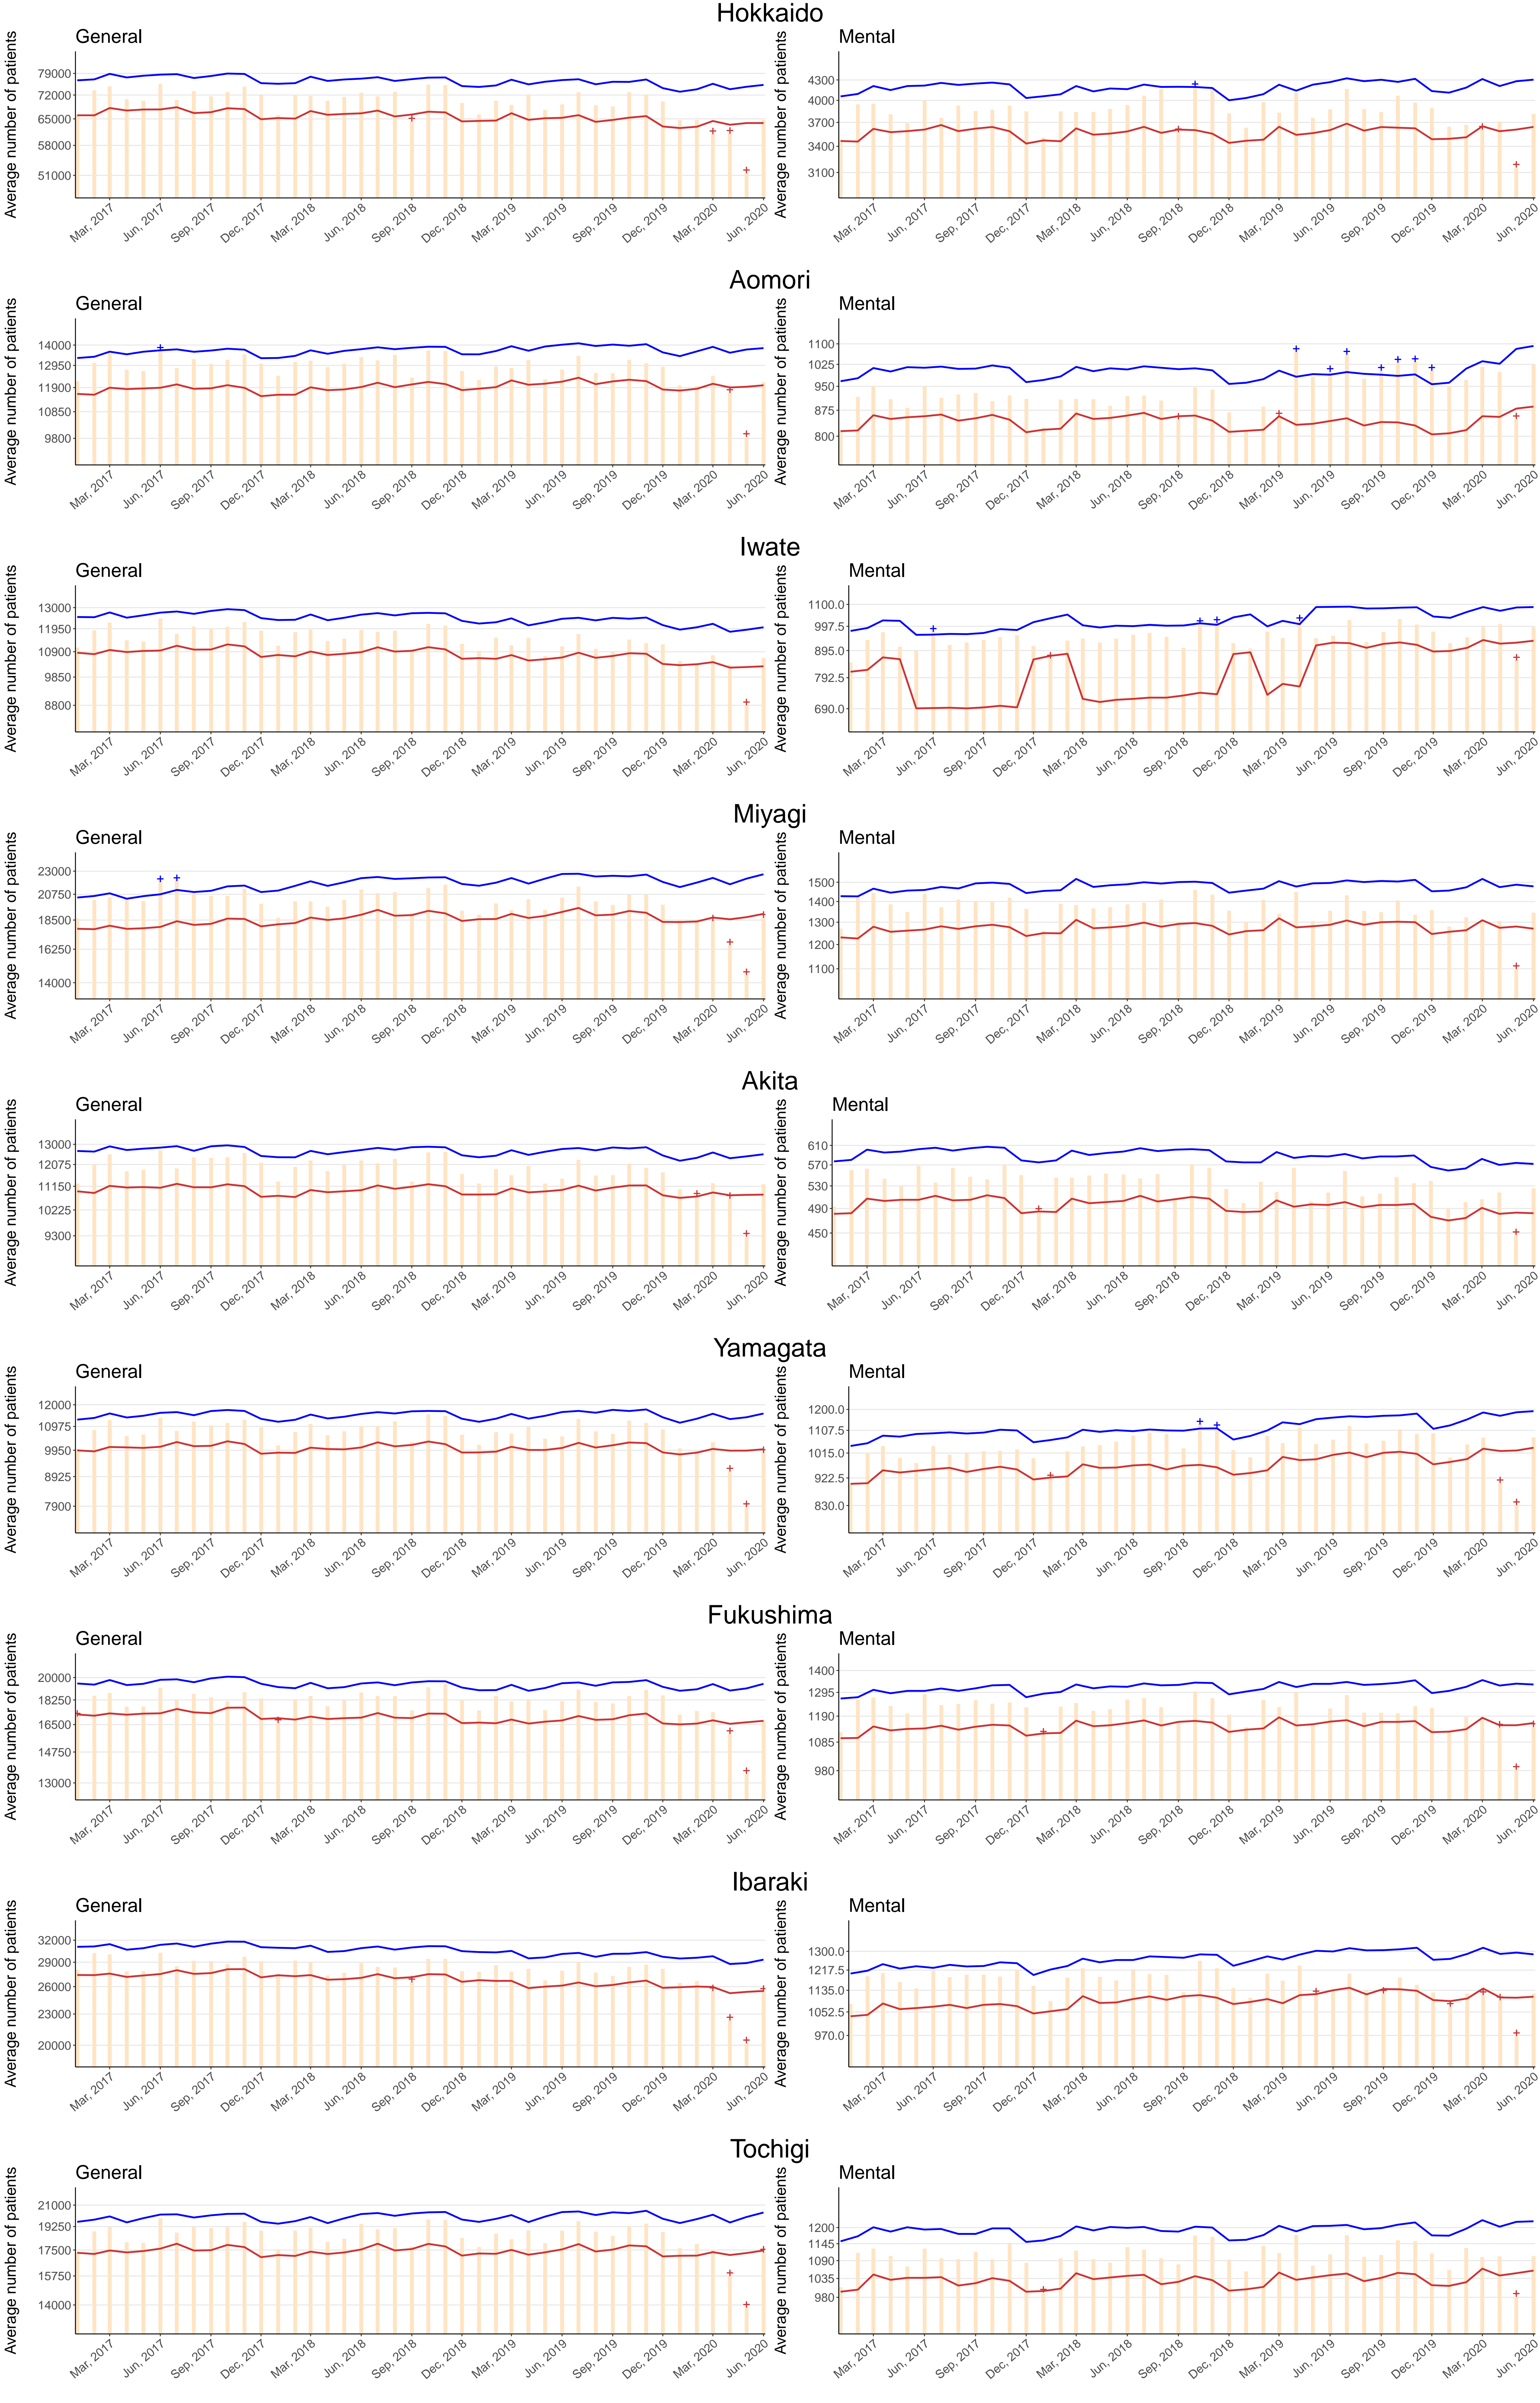



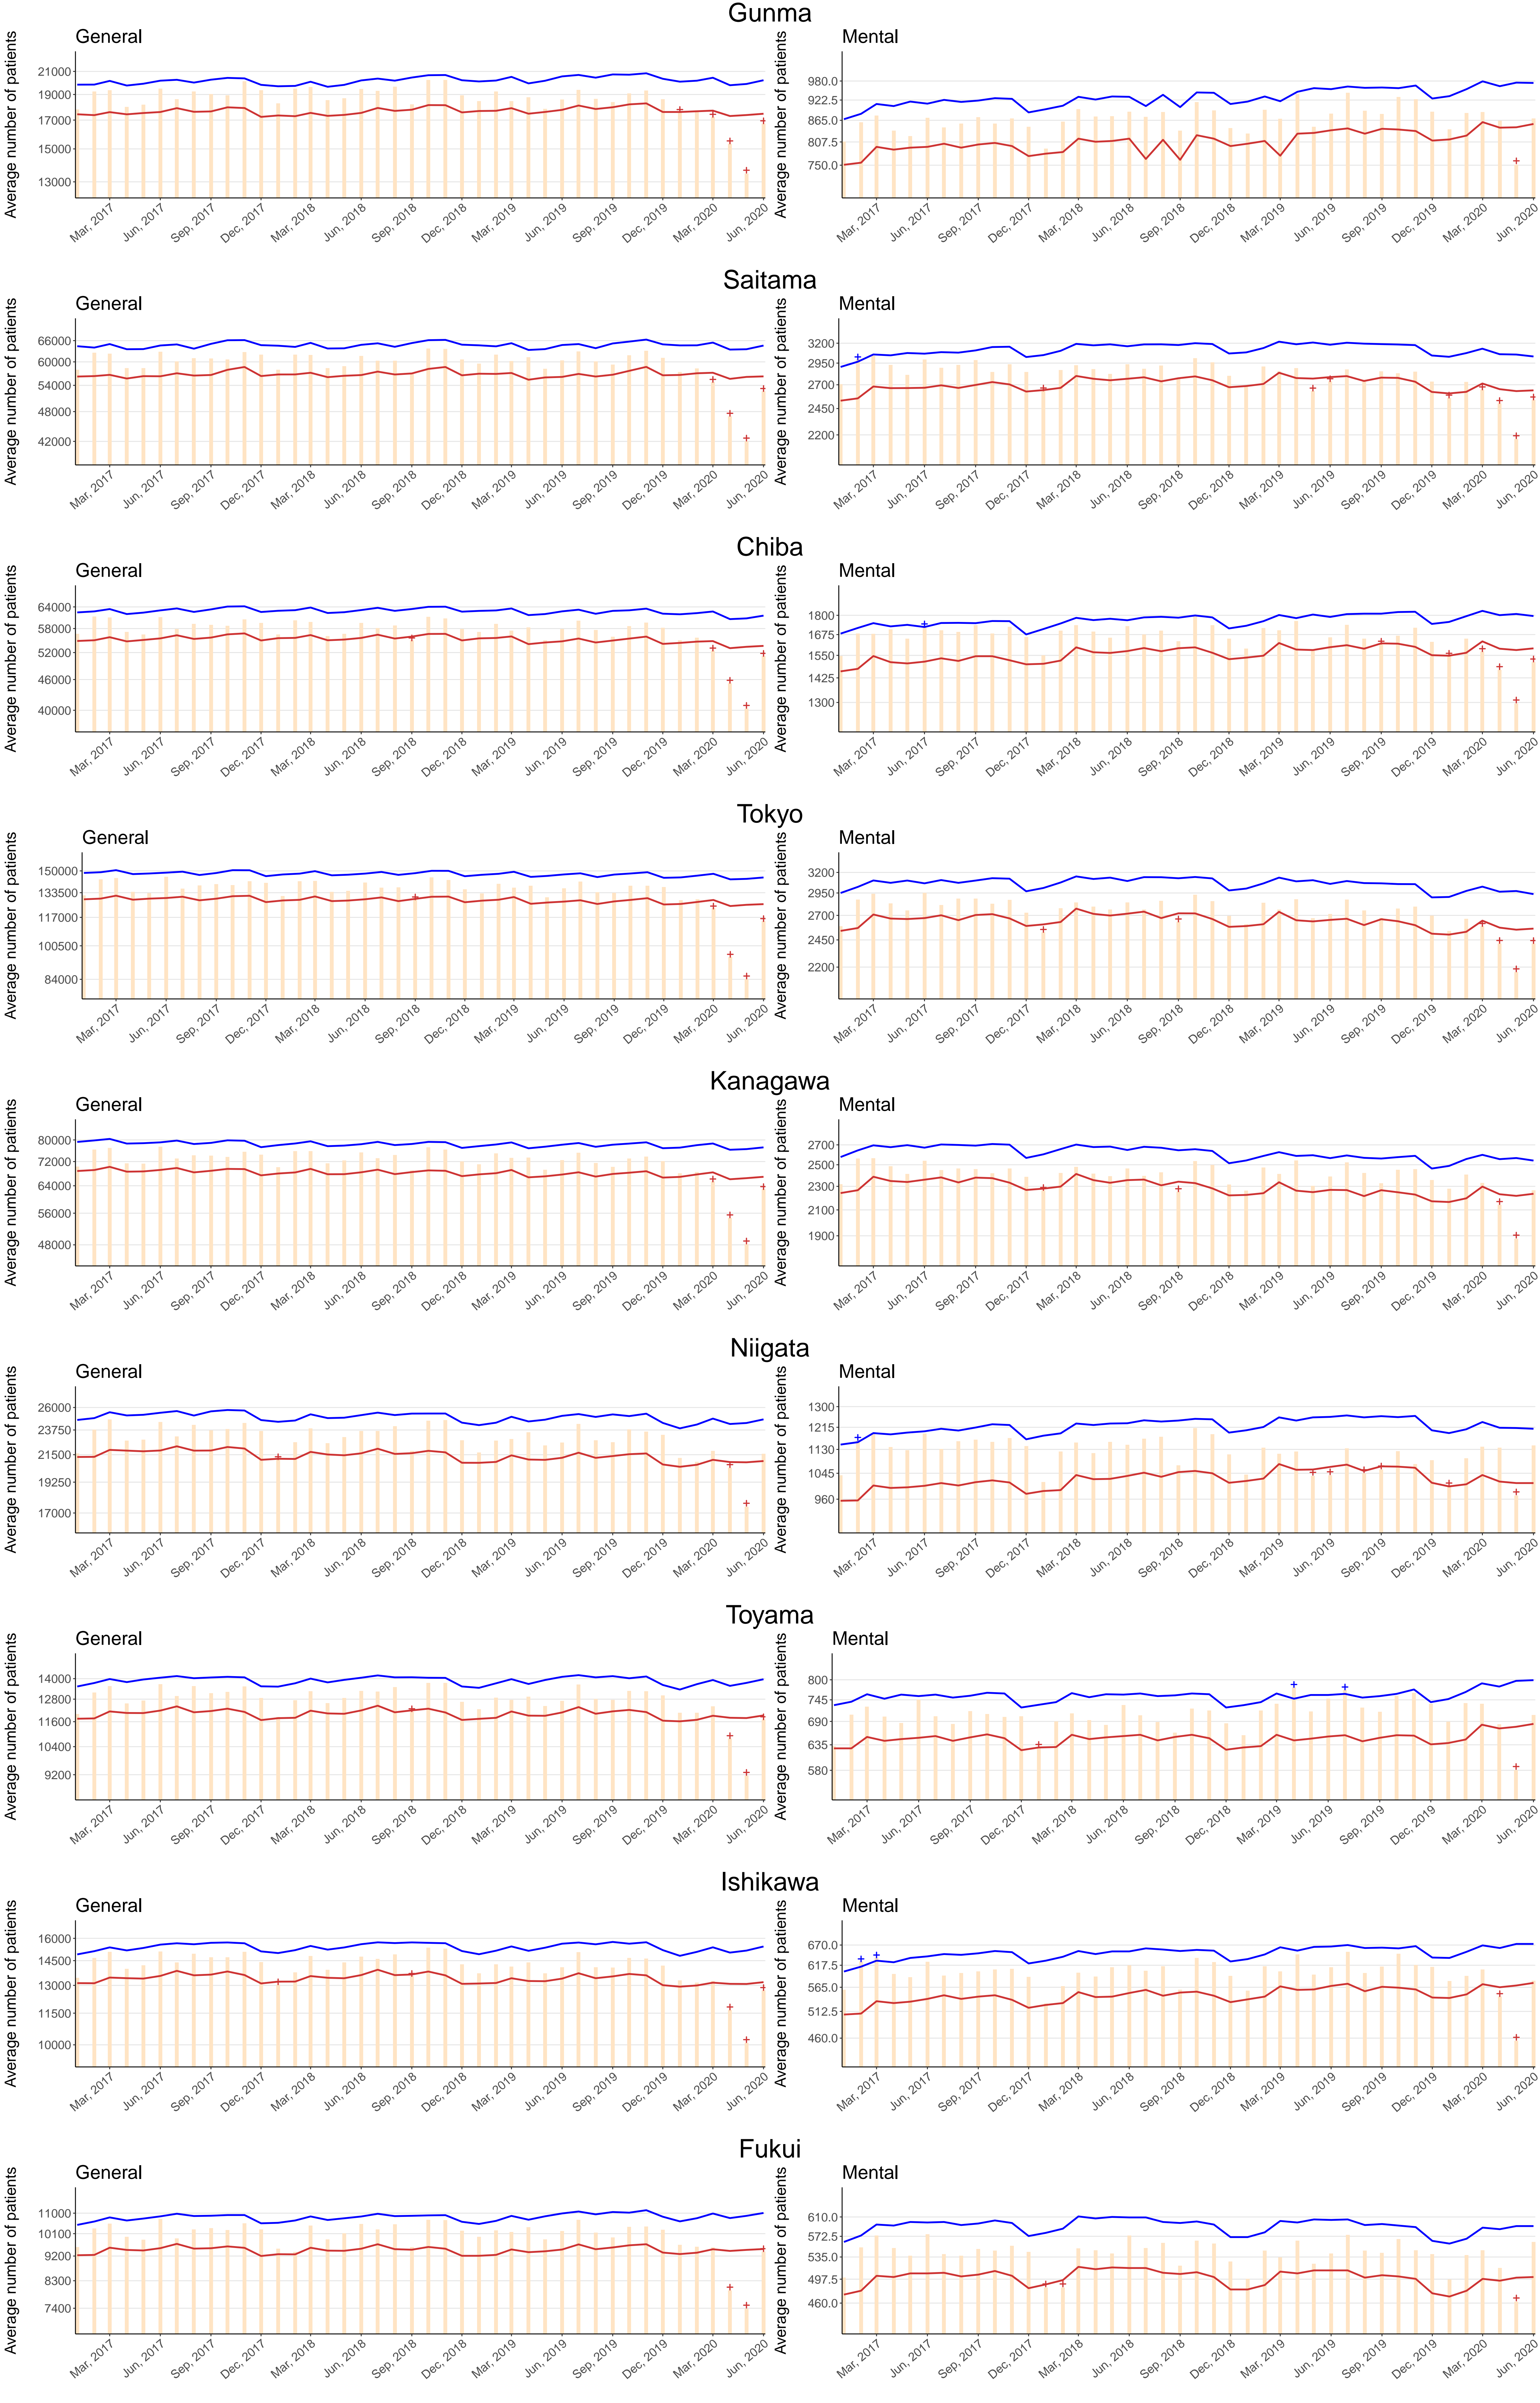



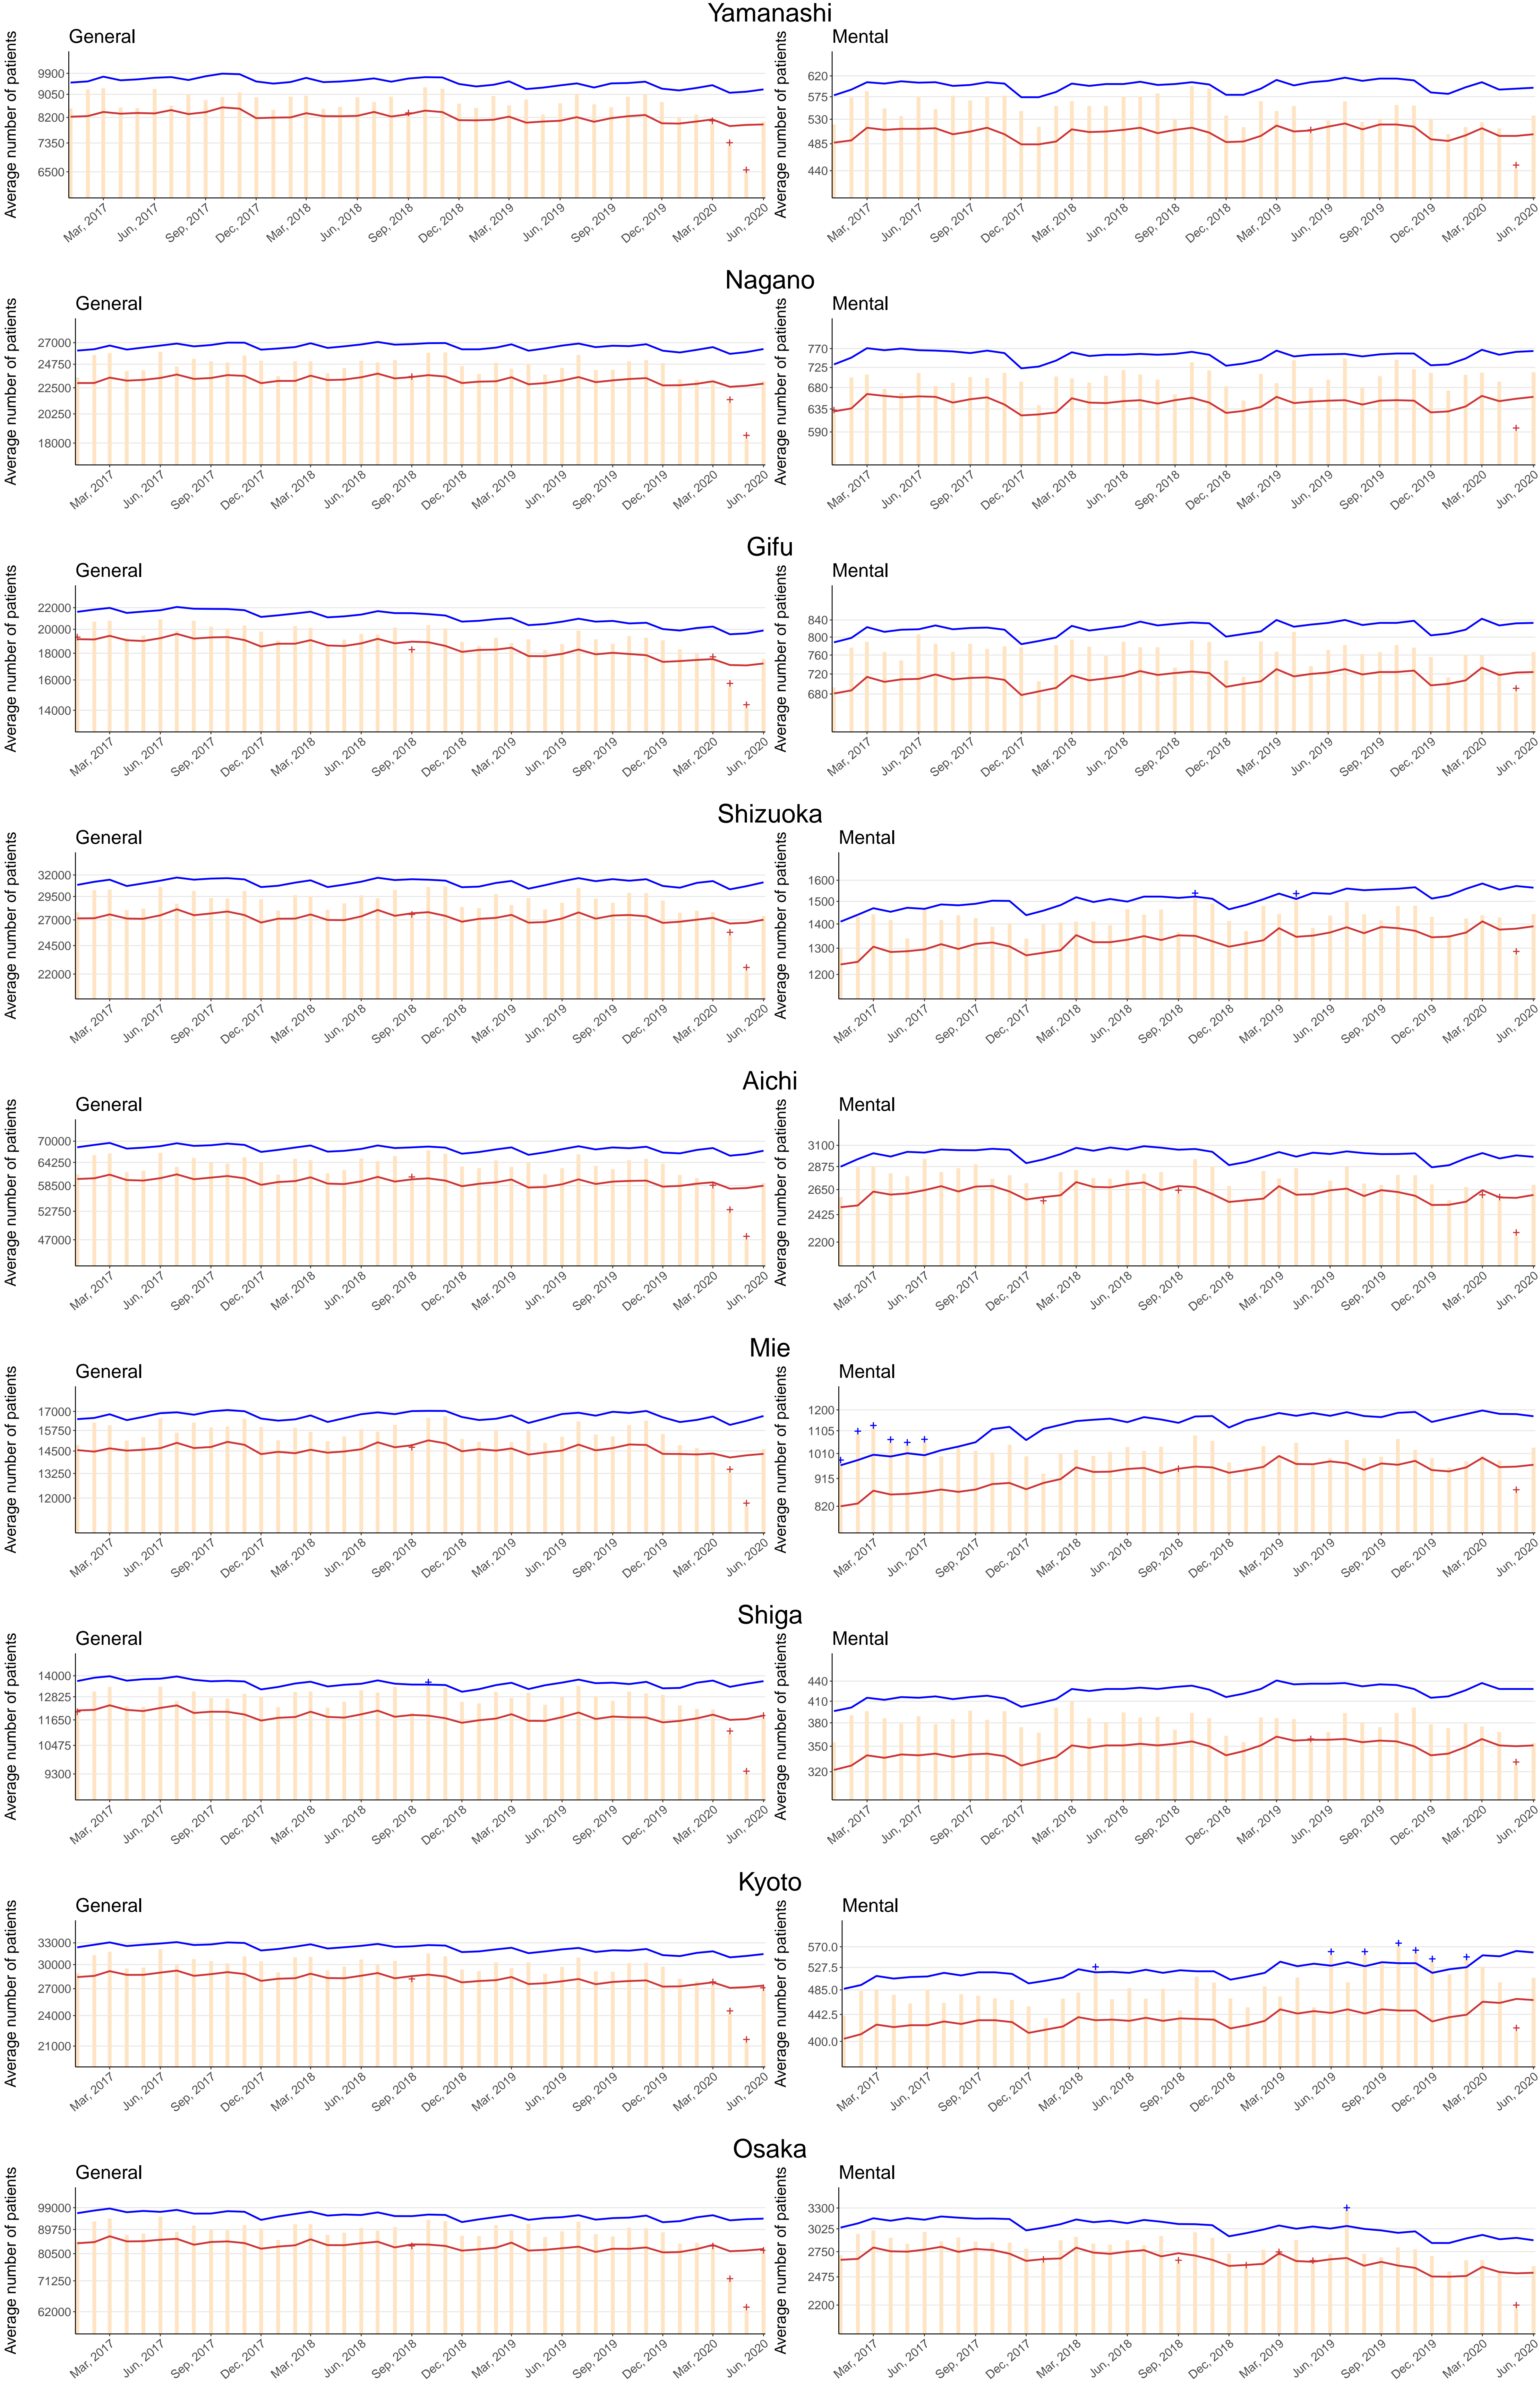

General

Average number of patients

Average number of patients

Mental

Average number of patients

Average number of patients

General

Average number of patients

Average number of patients

Mental

Average number of patients

Average number of patients

General

Average number of patients

Average number of patients

Mental

Average number of patients

Average number of patients

General

Average number of patients

Average number of patients

Mental

Average number of patients

Average number of patients

General

Average number of patients

Average number of patients

Mental

Average number of patients

Average number of patients

General

Average number of patients

Average number of patients

Mental

Average number of patients

Average number of patients

General

Average number of patients

Average number of patients

Mental

Average number of patients

Average number of patients

General

Average number of patients

Average number of patients

Mental

Average number of patients

Average number of patients



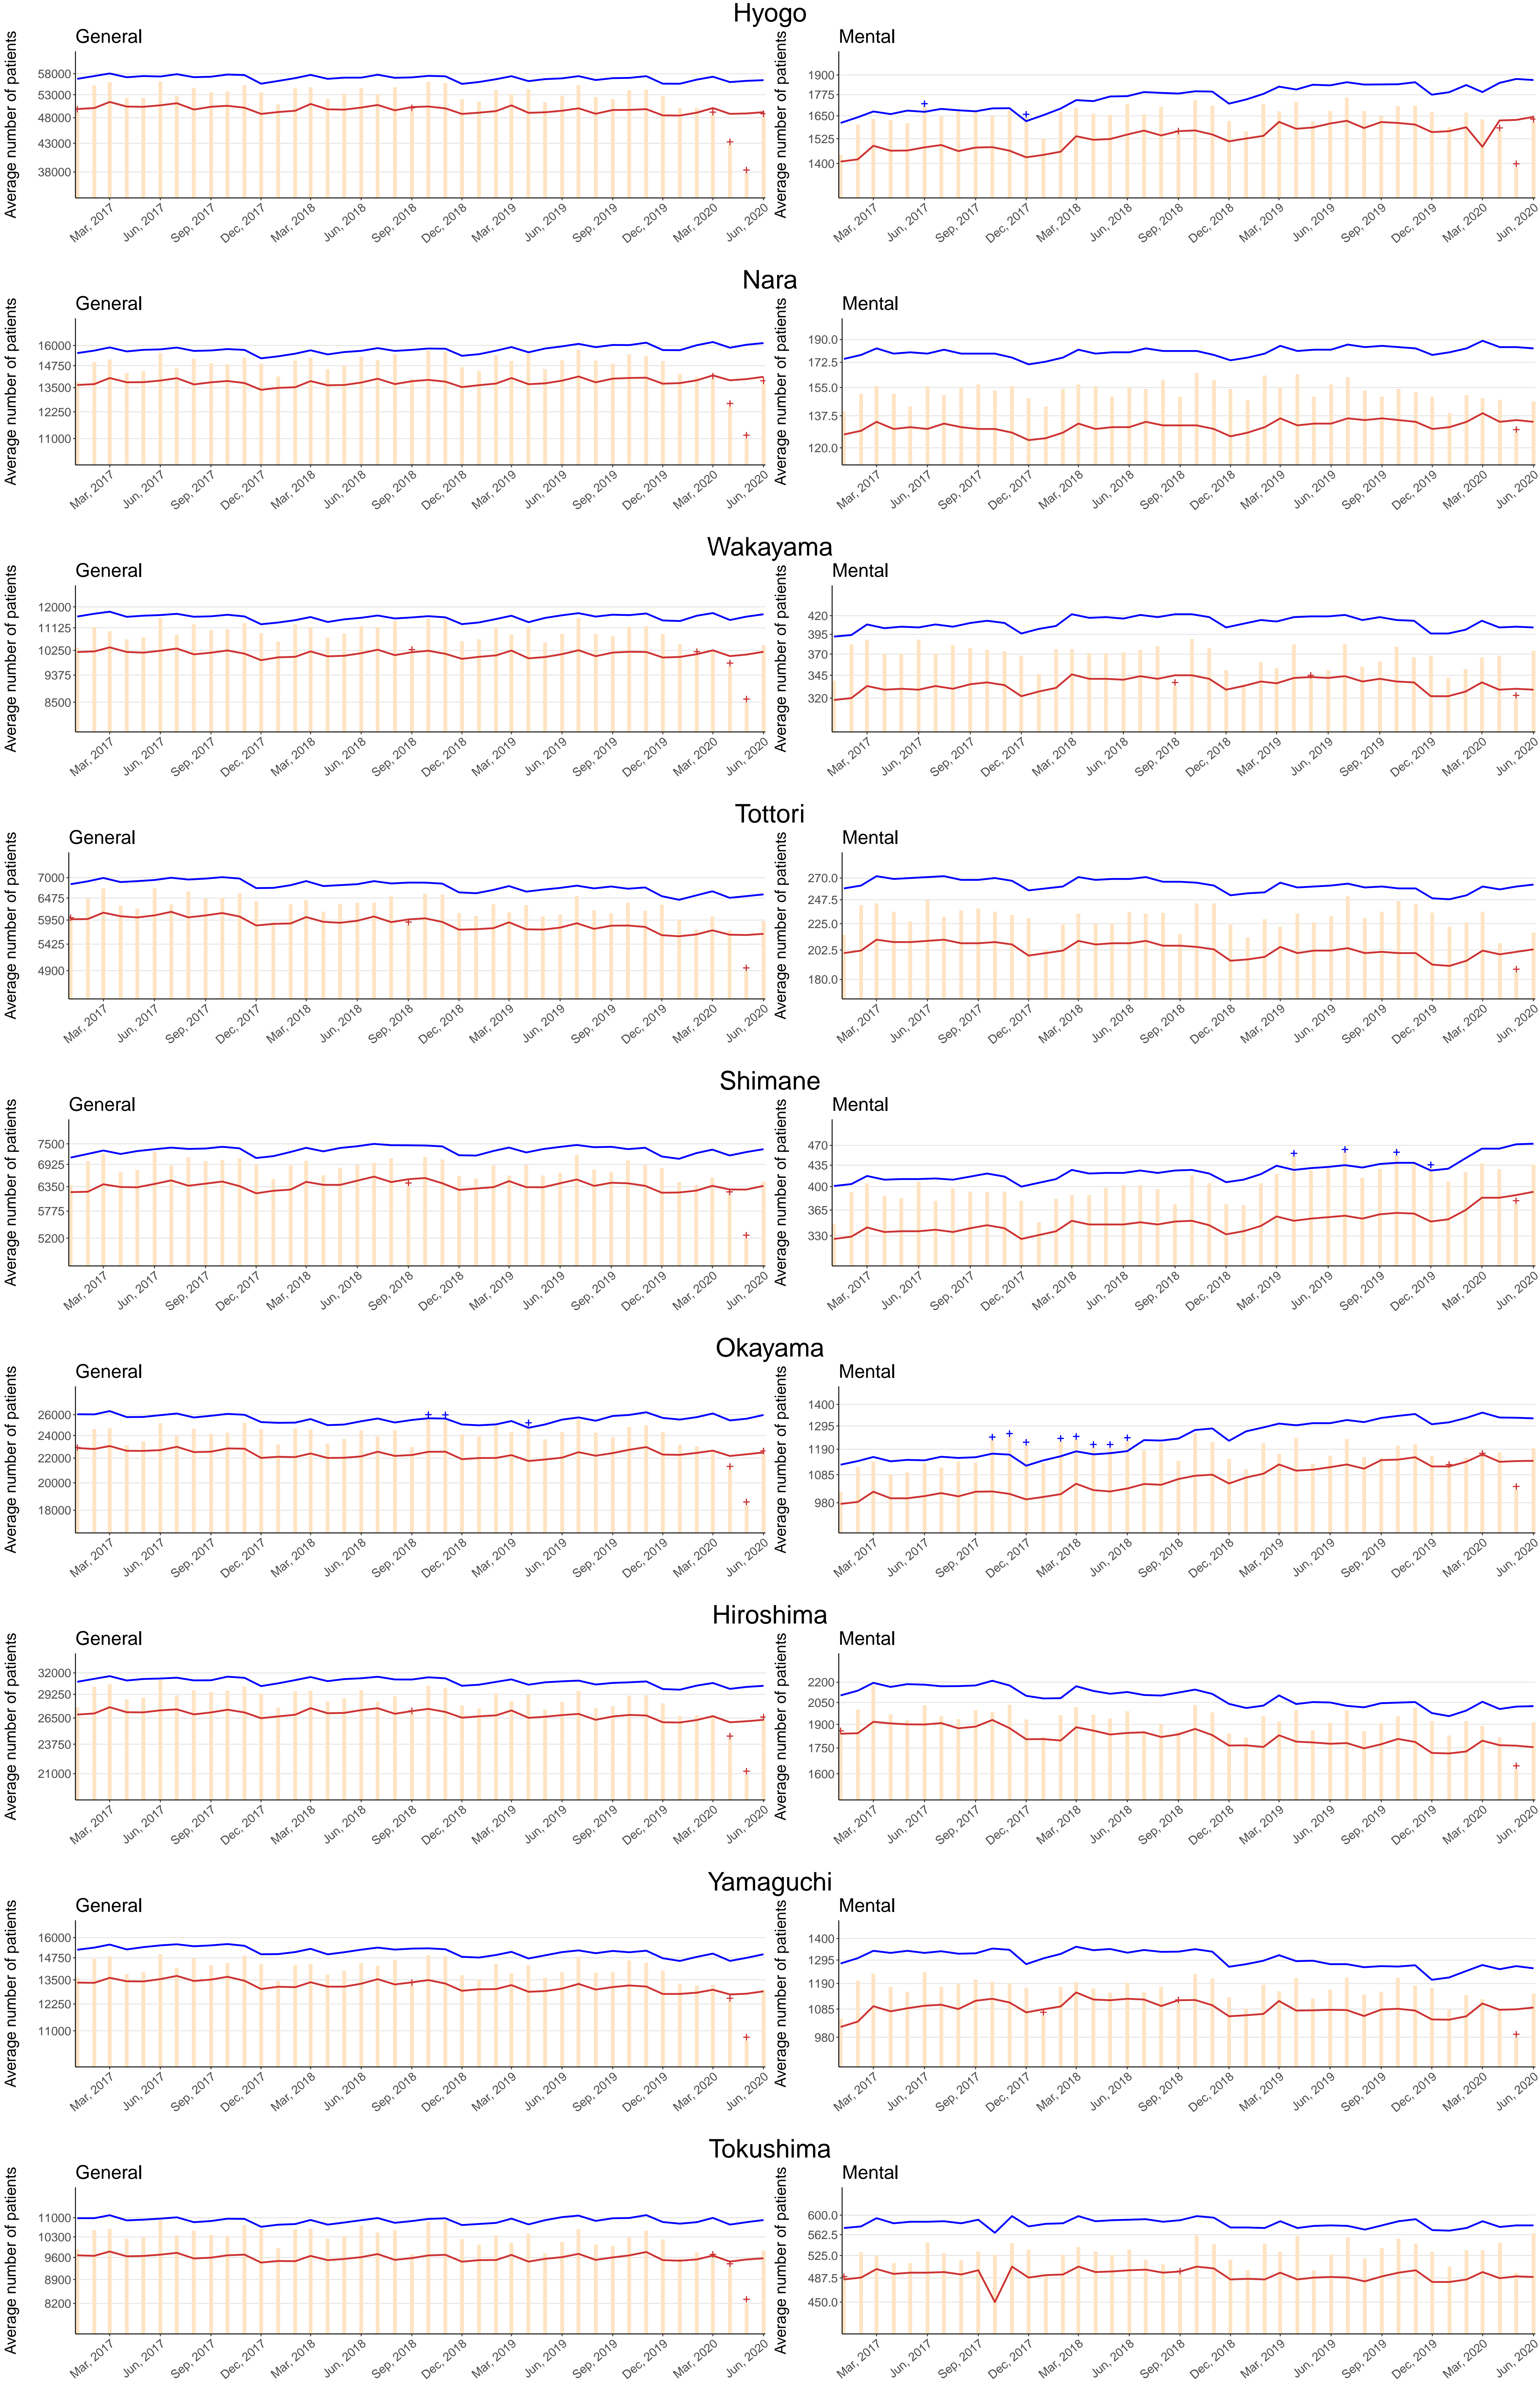

General

Average number of patients

Average number of patients

Mental

Average number of patients

Average number of patients

General

Average number of patients

Average number of patients

Mental

Average number of patients

Average number of patients

General

Average number of patients

Average number of patients

Mental

Average number of patients

Average number of patients

General

Average number of patients

Average number of patients

Mental

Average number of patients

Average number of patients

General

Average number of patients

Average number of patients

Mental

Average number of patients

Average number of patients

General

Average number of patients

Average number of patients

Mental

Average number of patients

Average number of patients

General

Average number of patients

Average number of patients

Mental

Average number of patients

Average number of patients



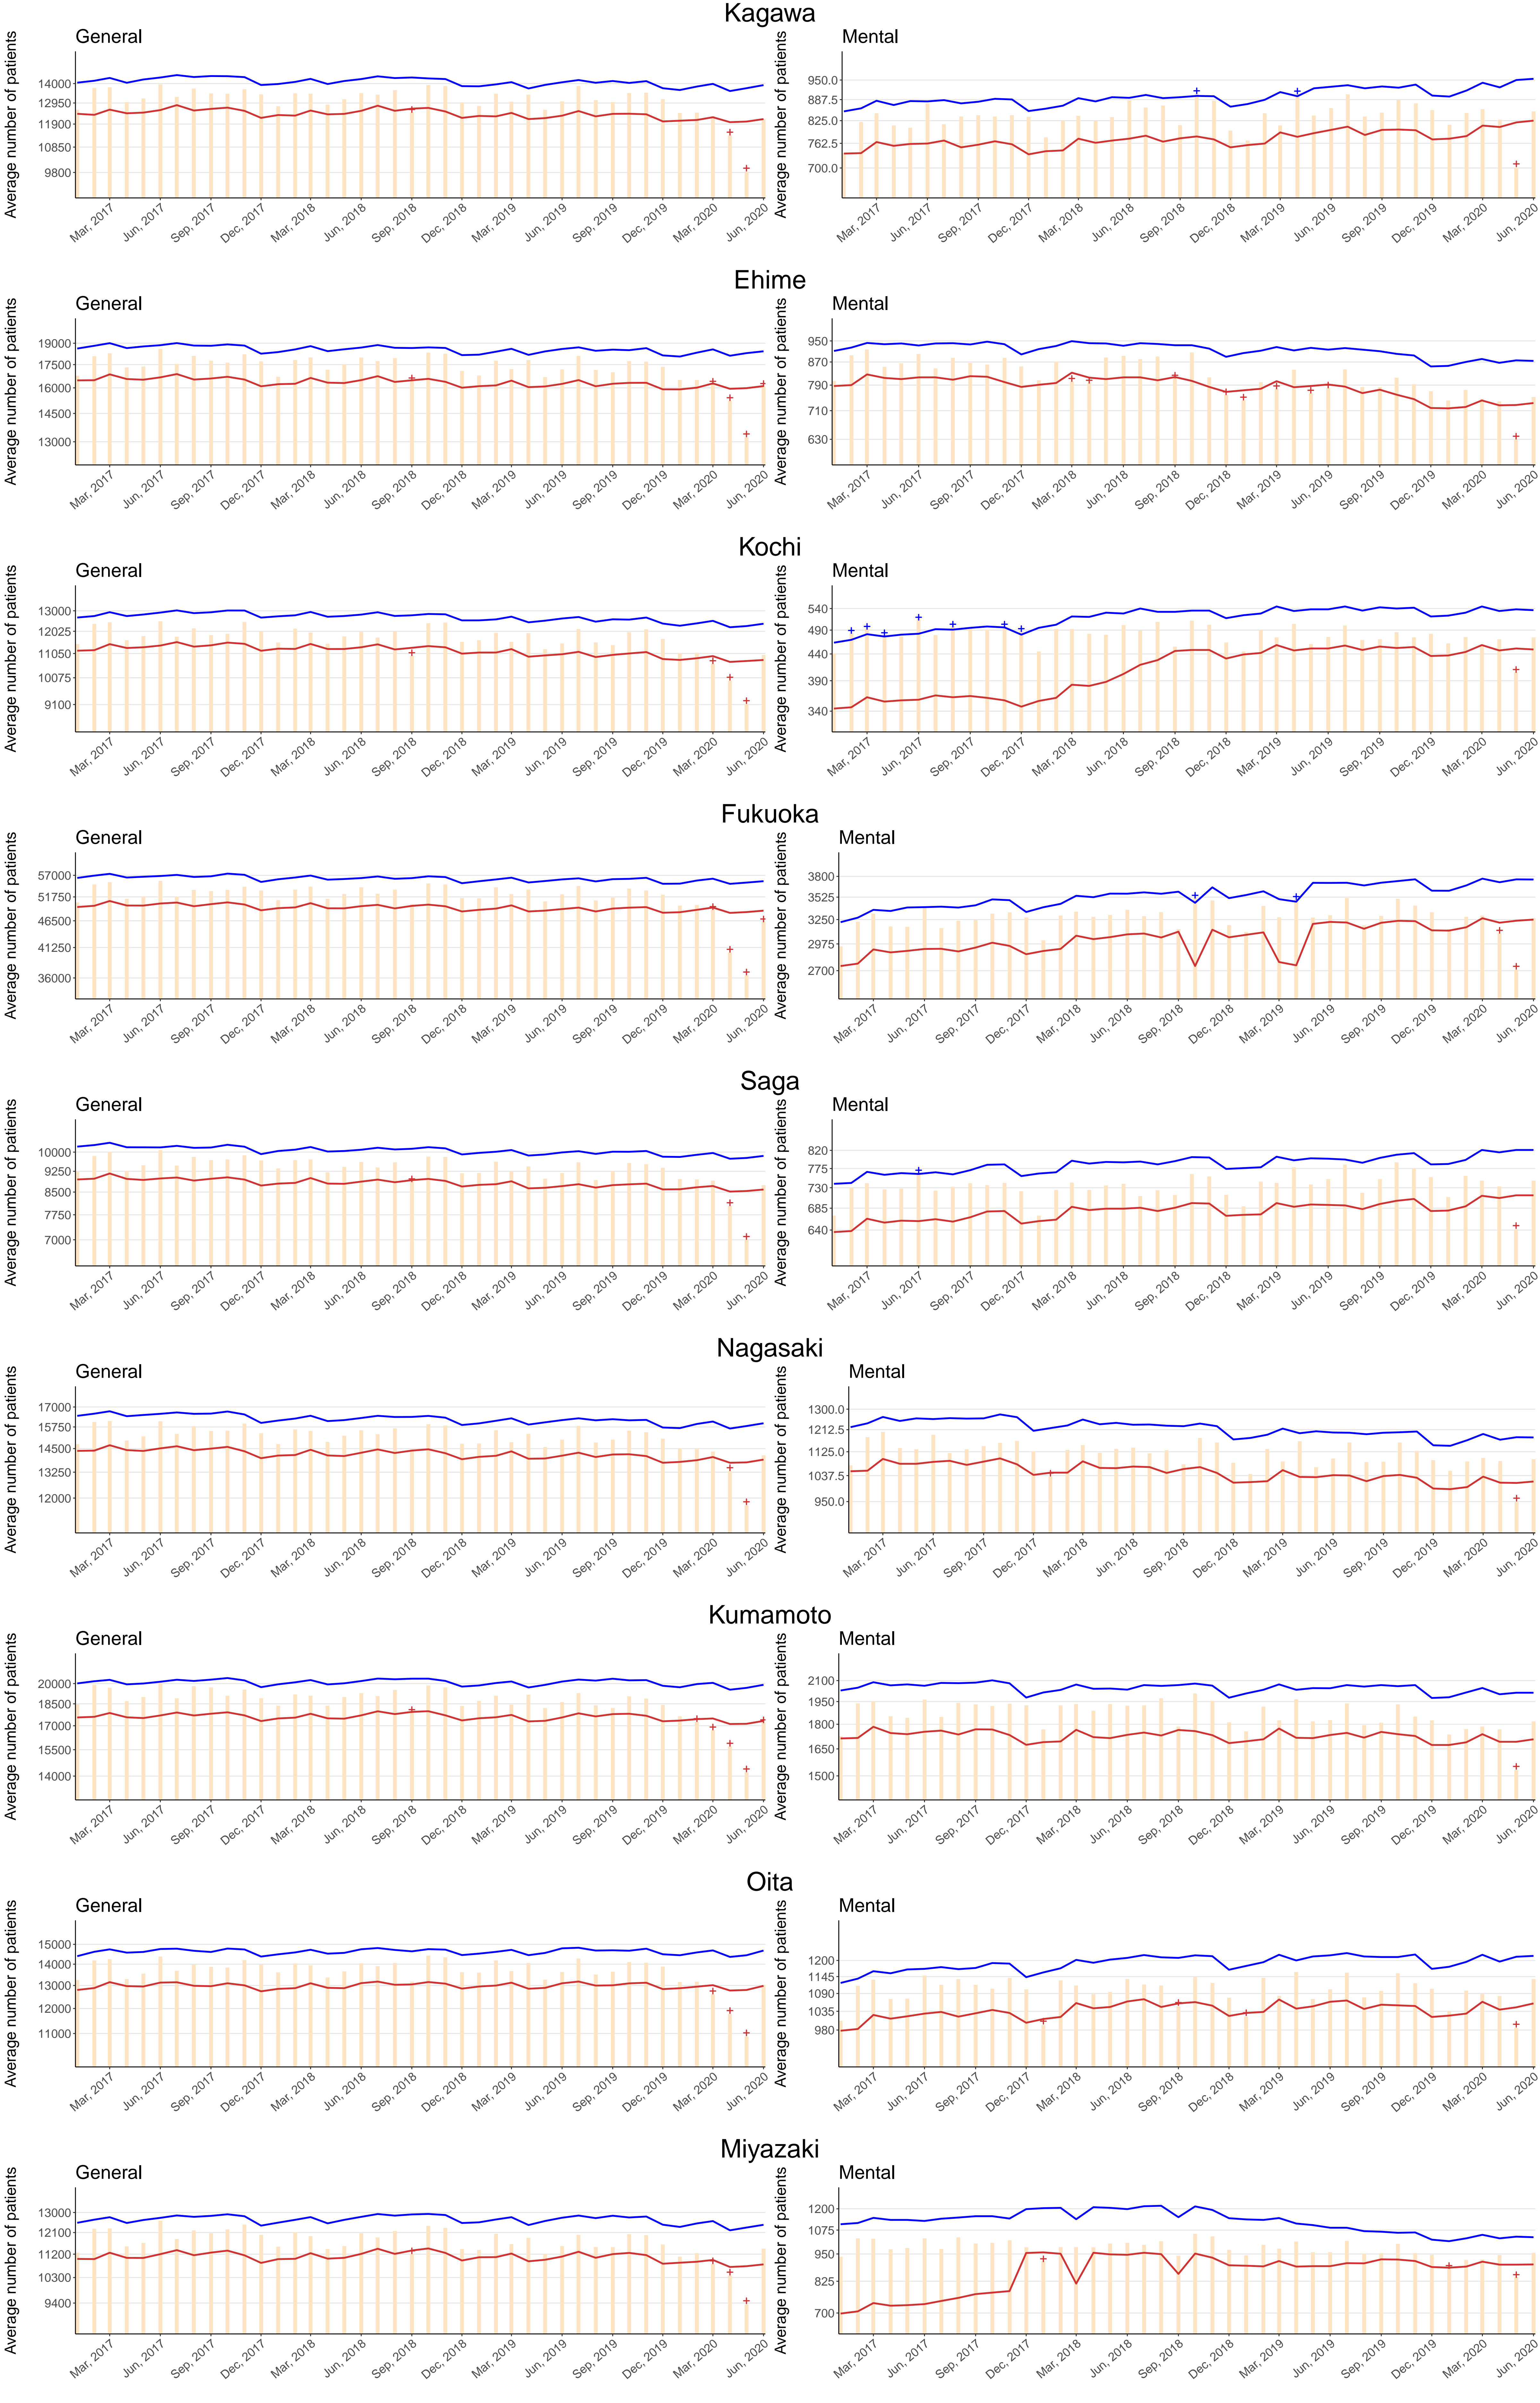

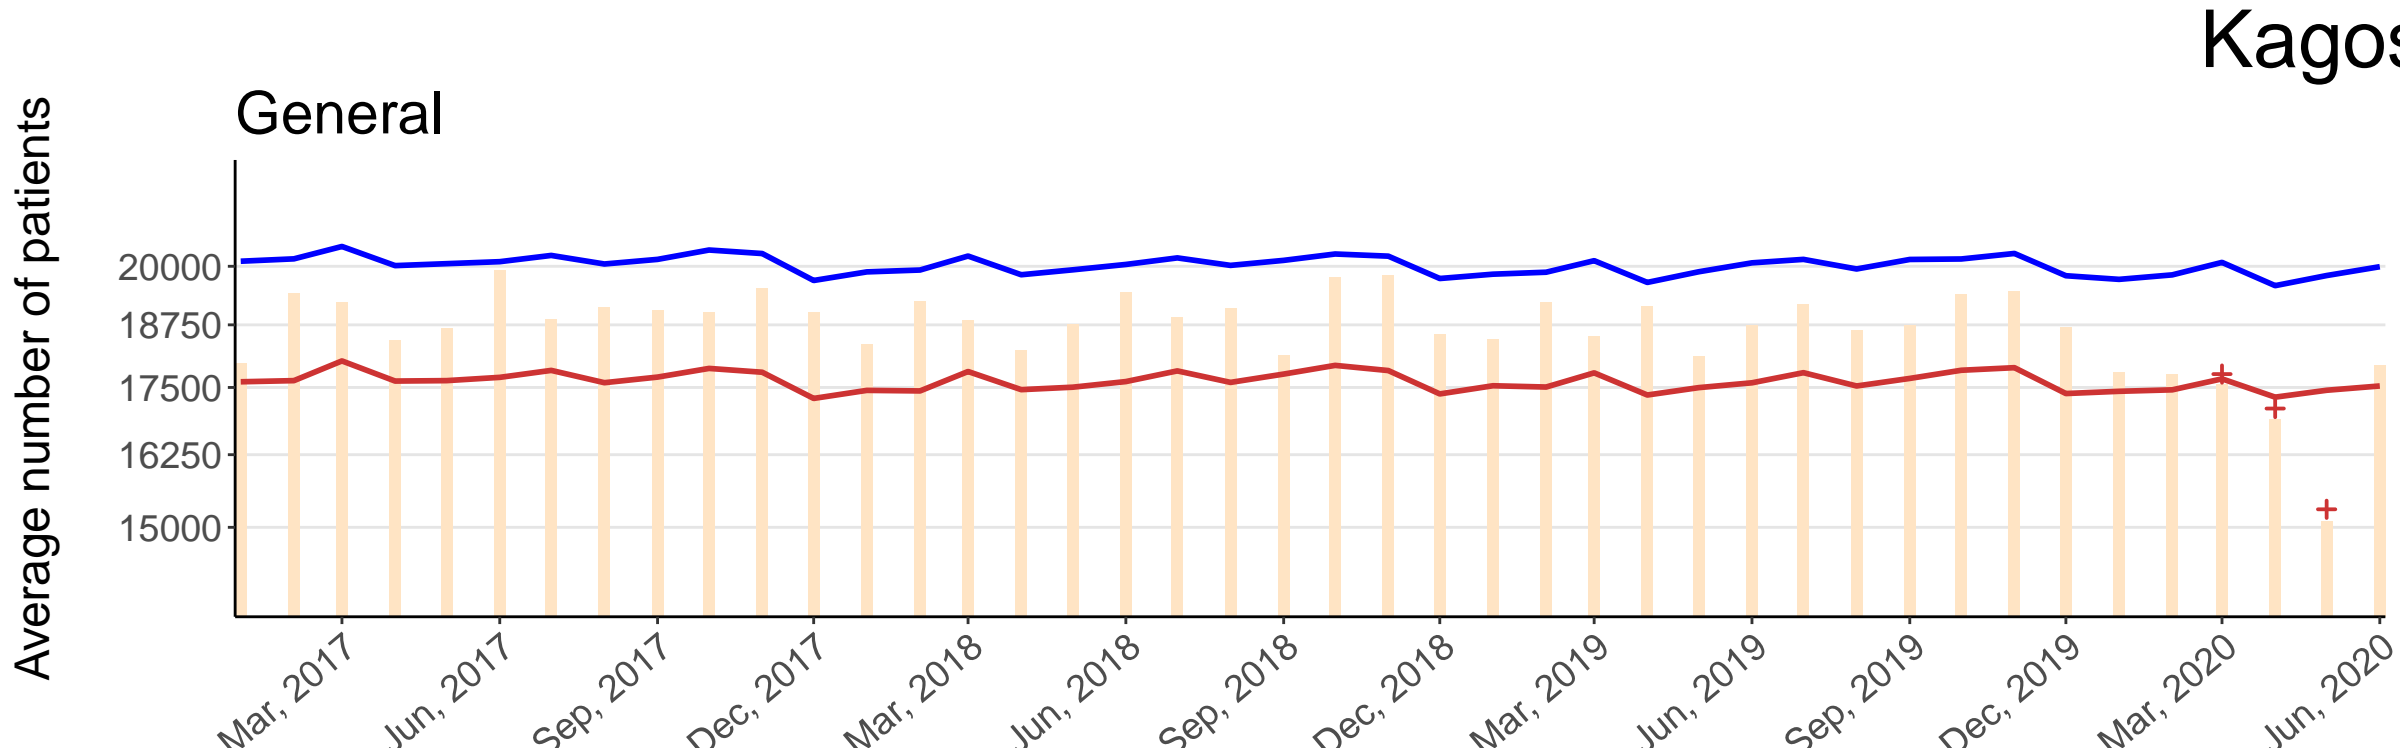

## Kagoshima

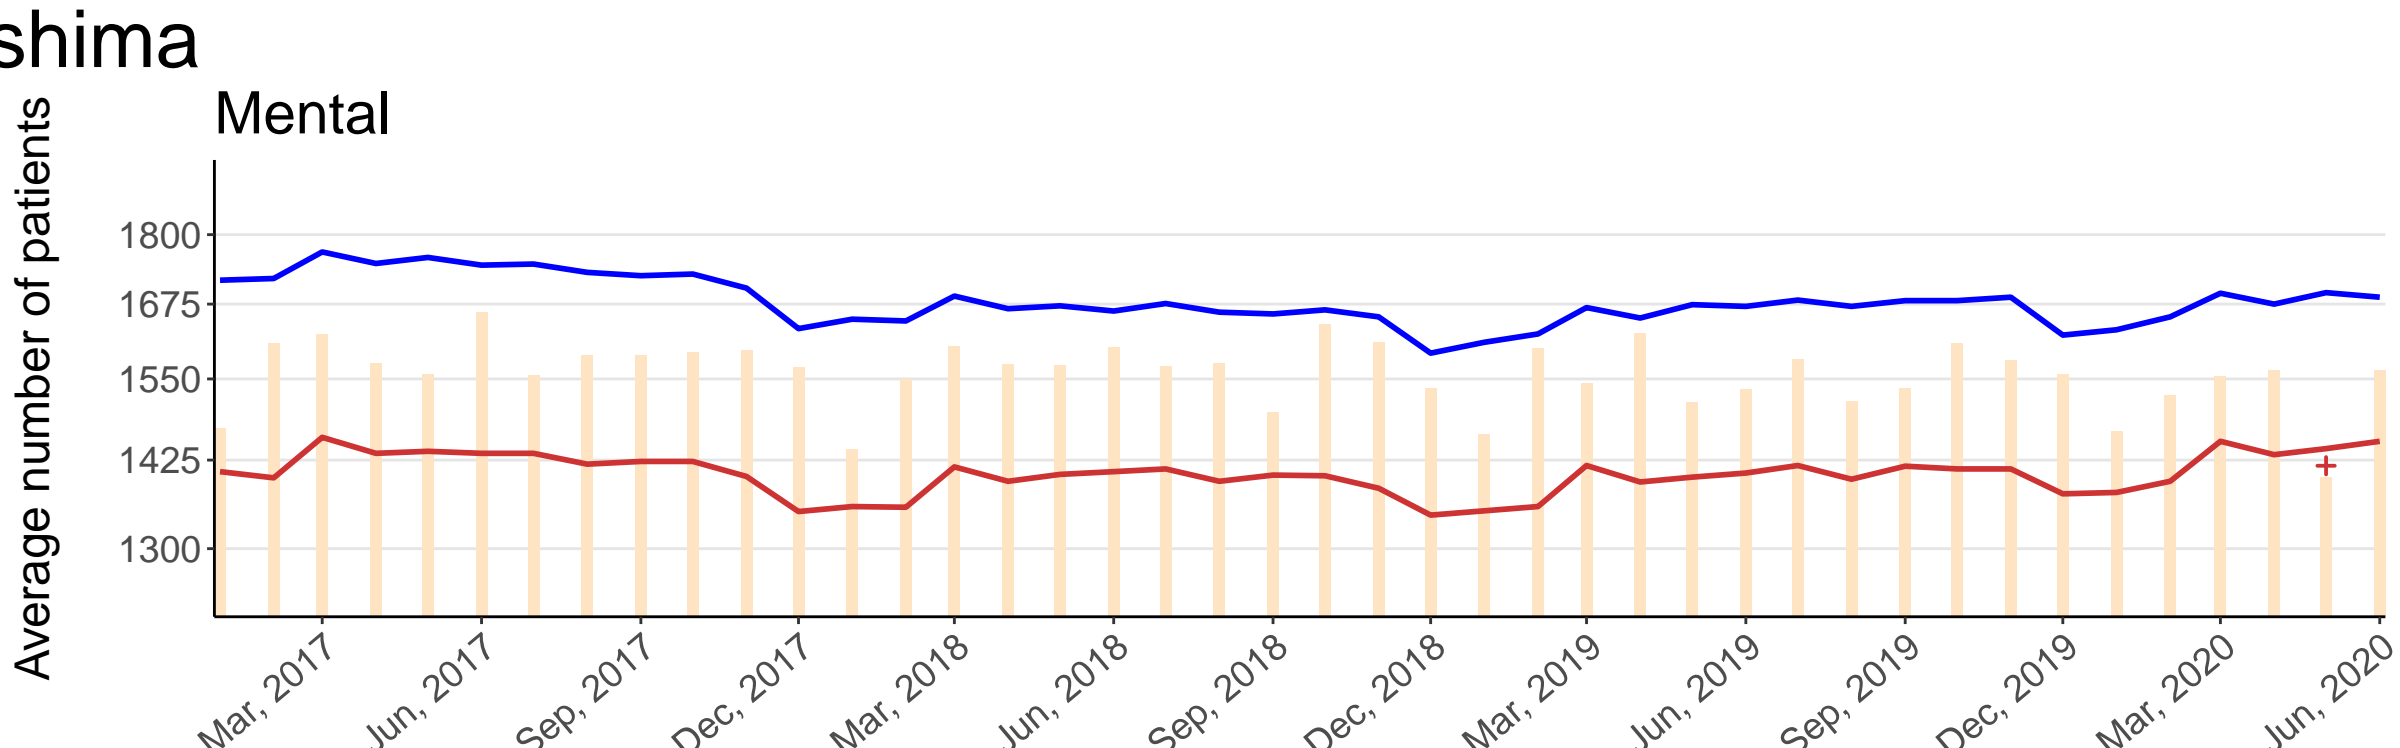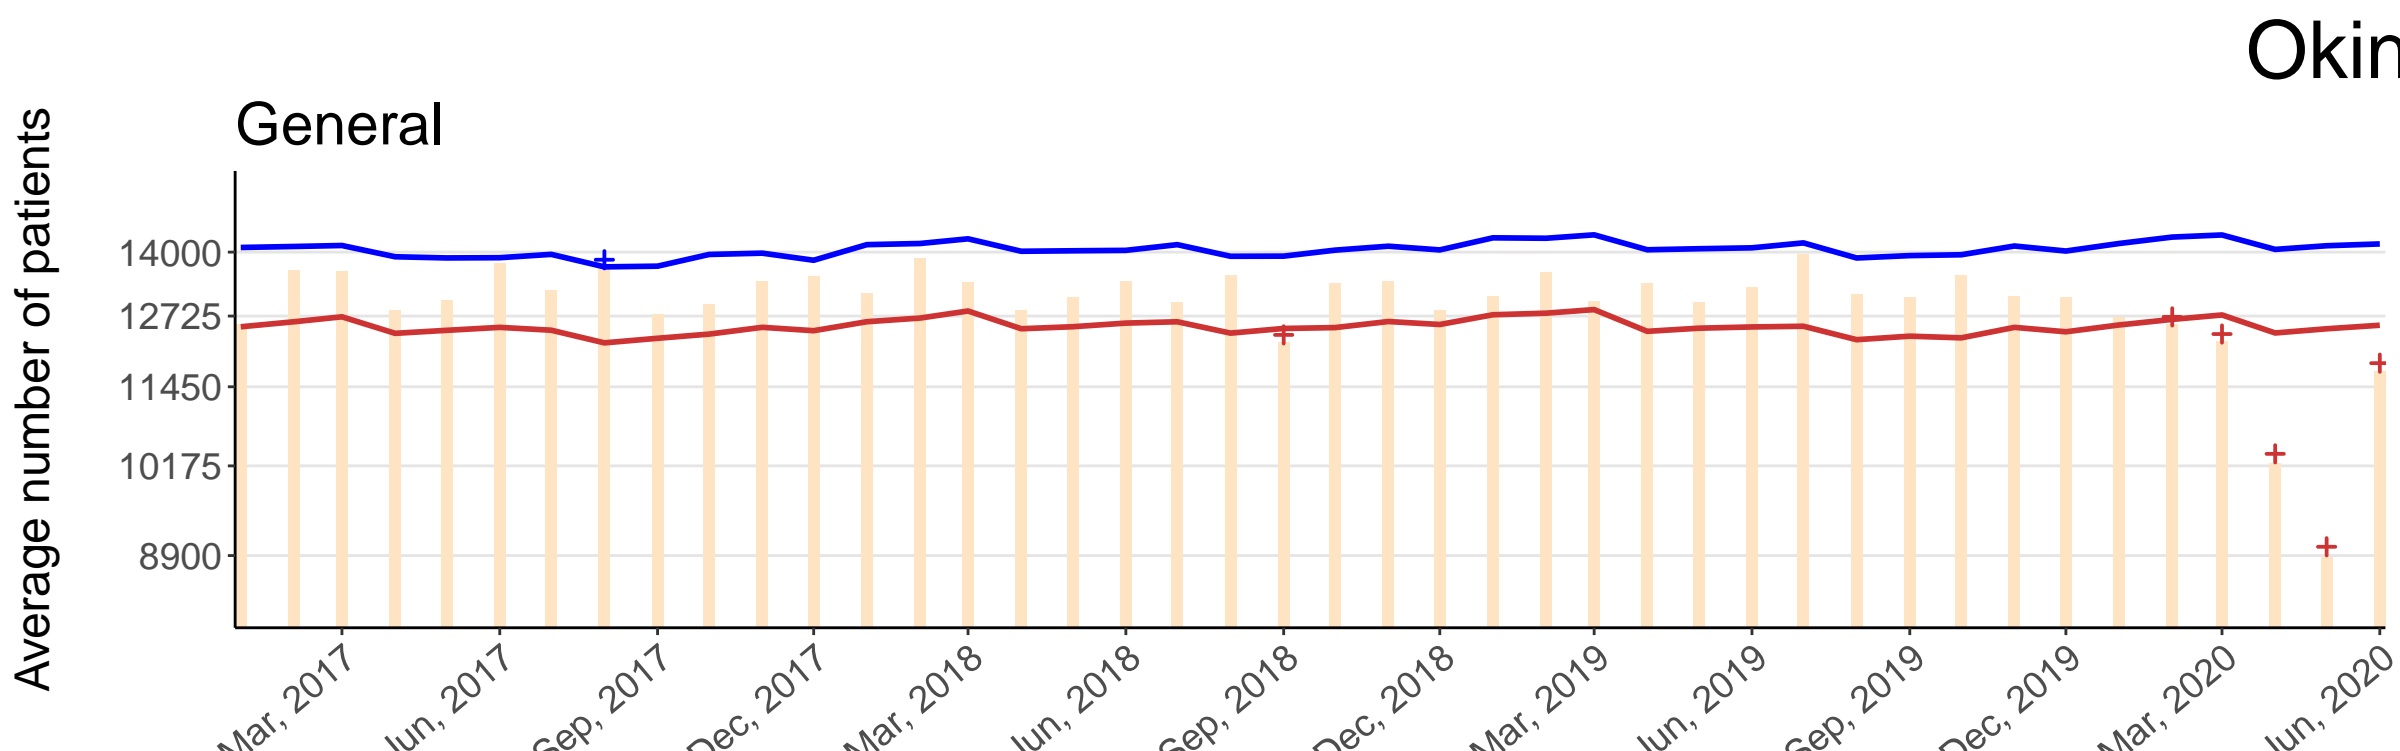

## Okinawa

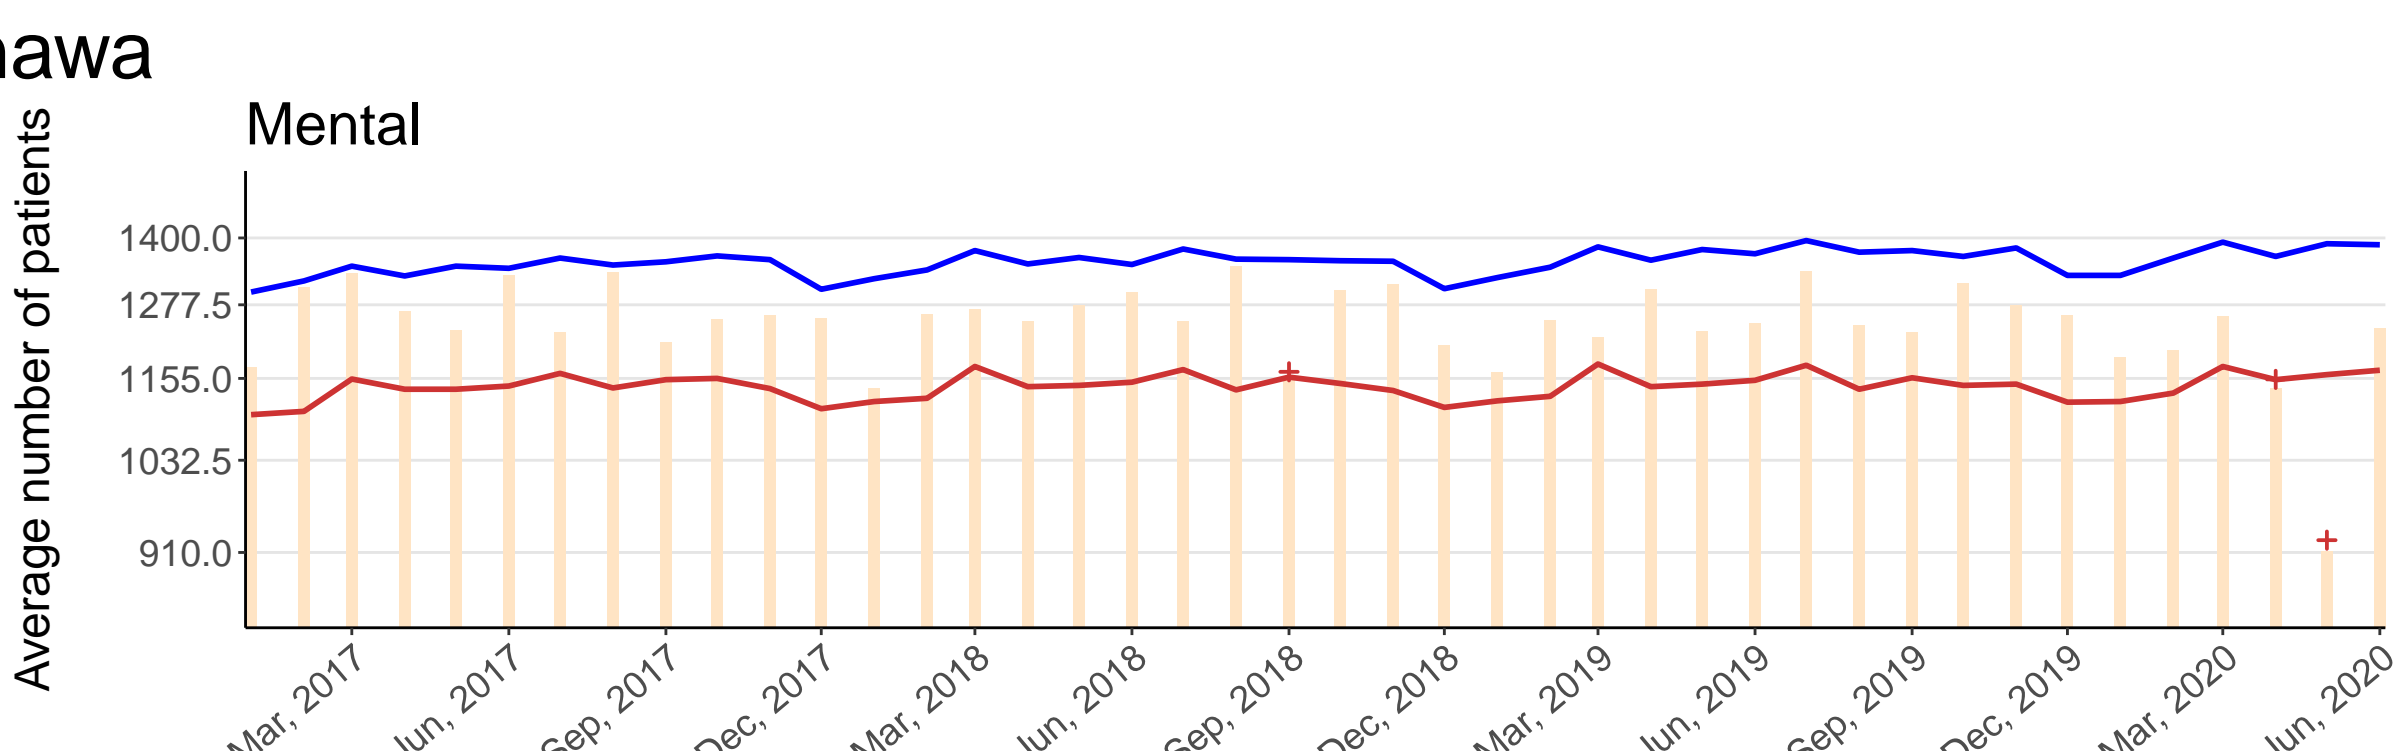

Supplement: s1 [file s1]
