# Supplementary material for: Trends in Healthcare Access in Japan during the First Wave of the COVID-19 Pandemic, up to June 2020
Source: MDPI journal article supplement (doi:10.3390/ijerph18063271), 2021-03-22

# Hokkaido

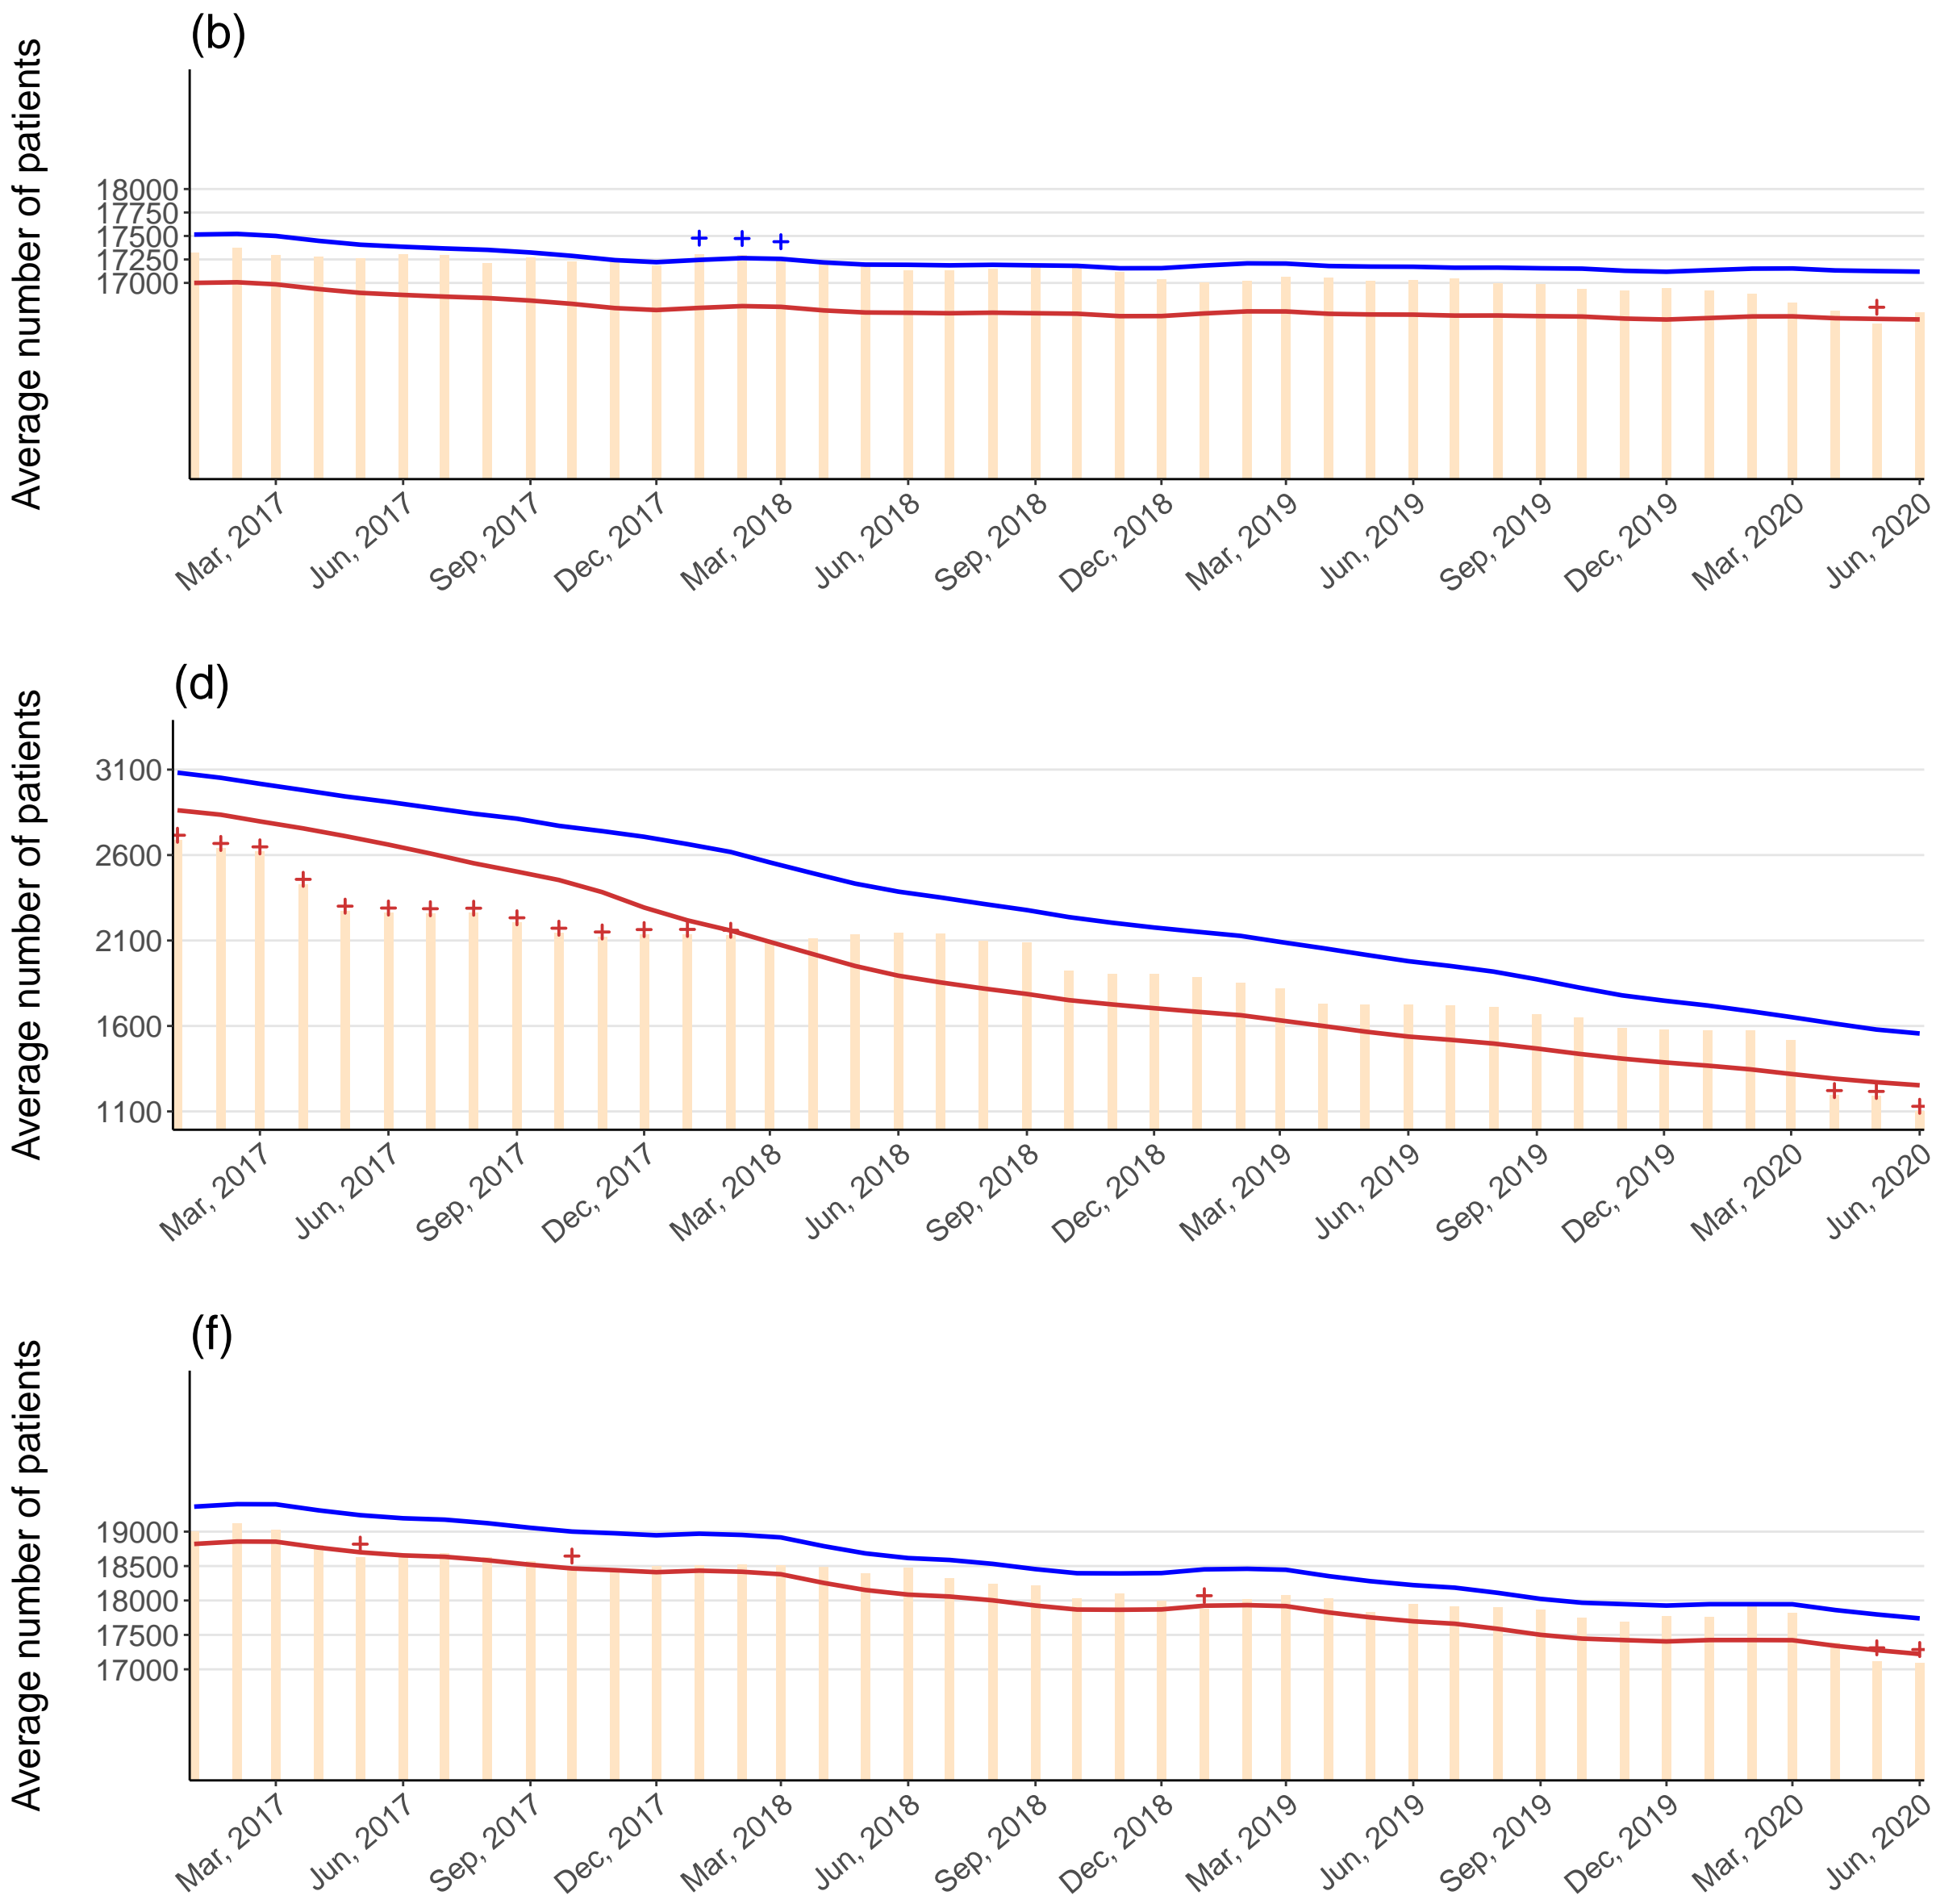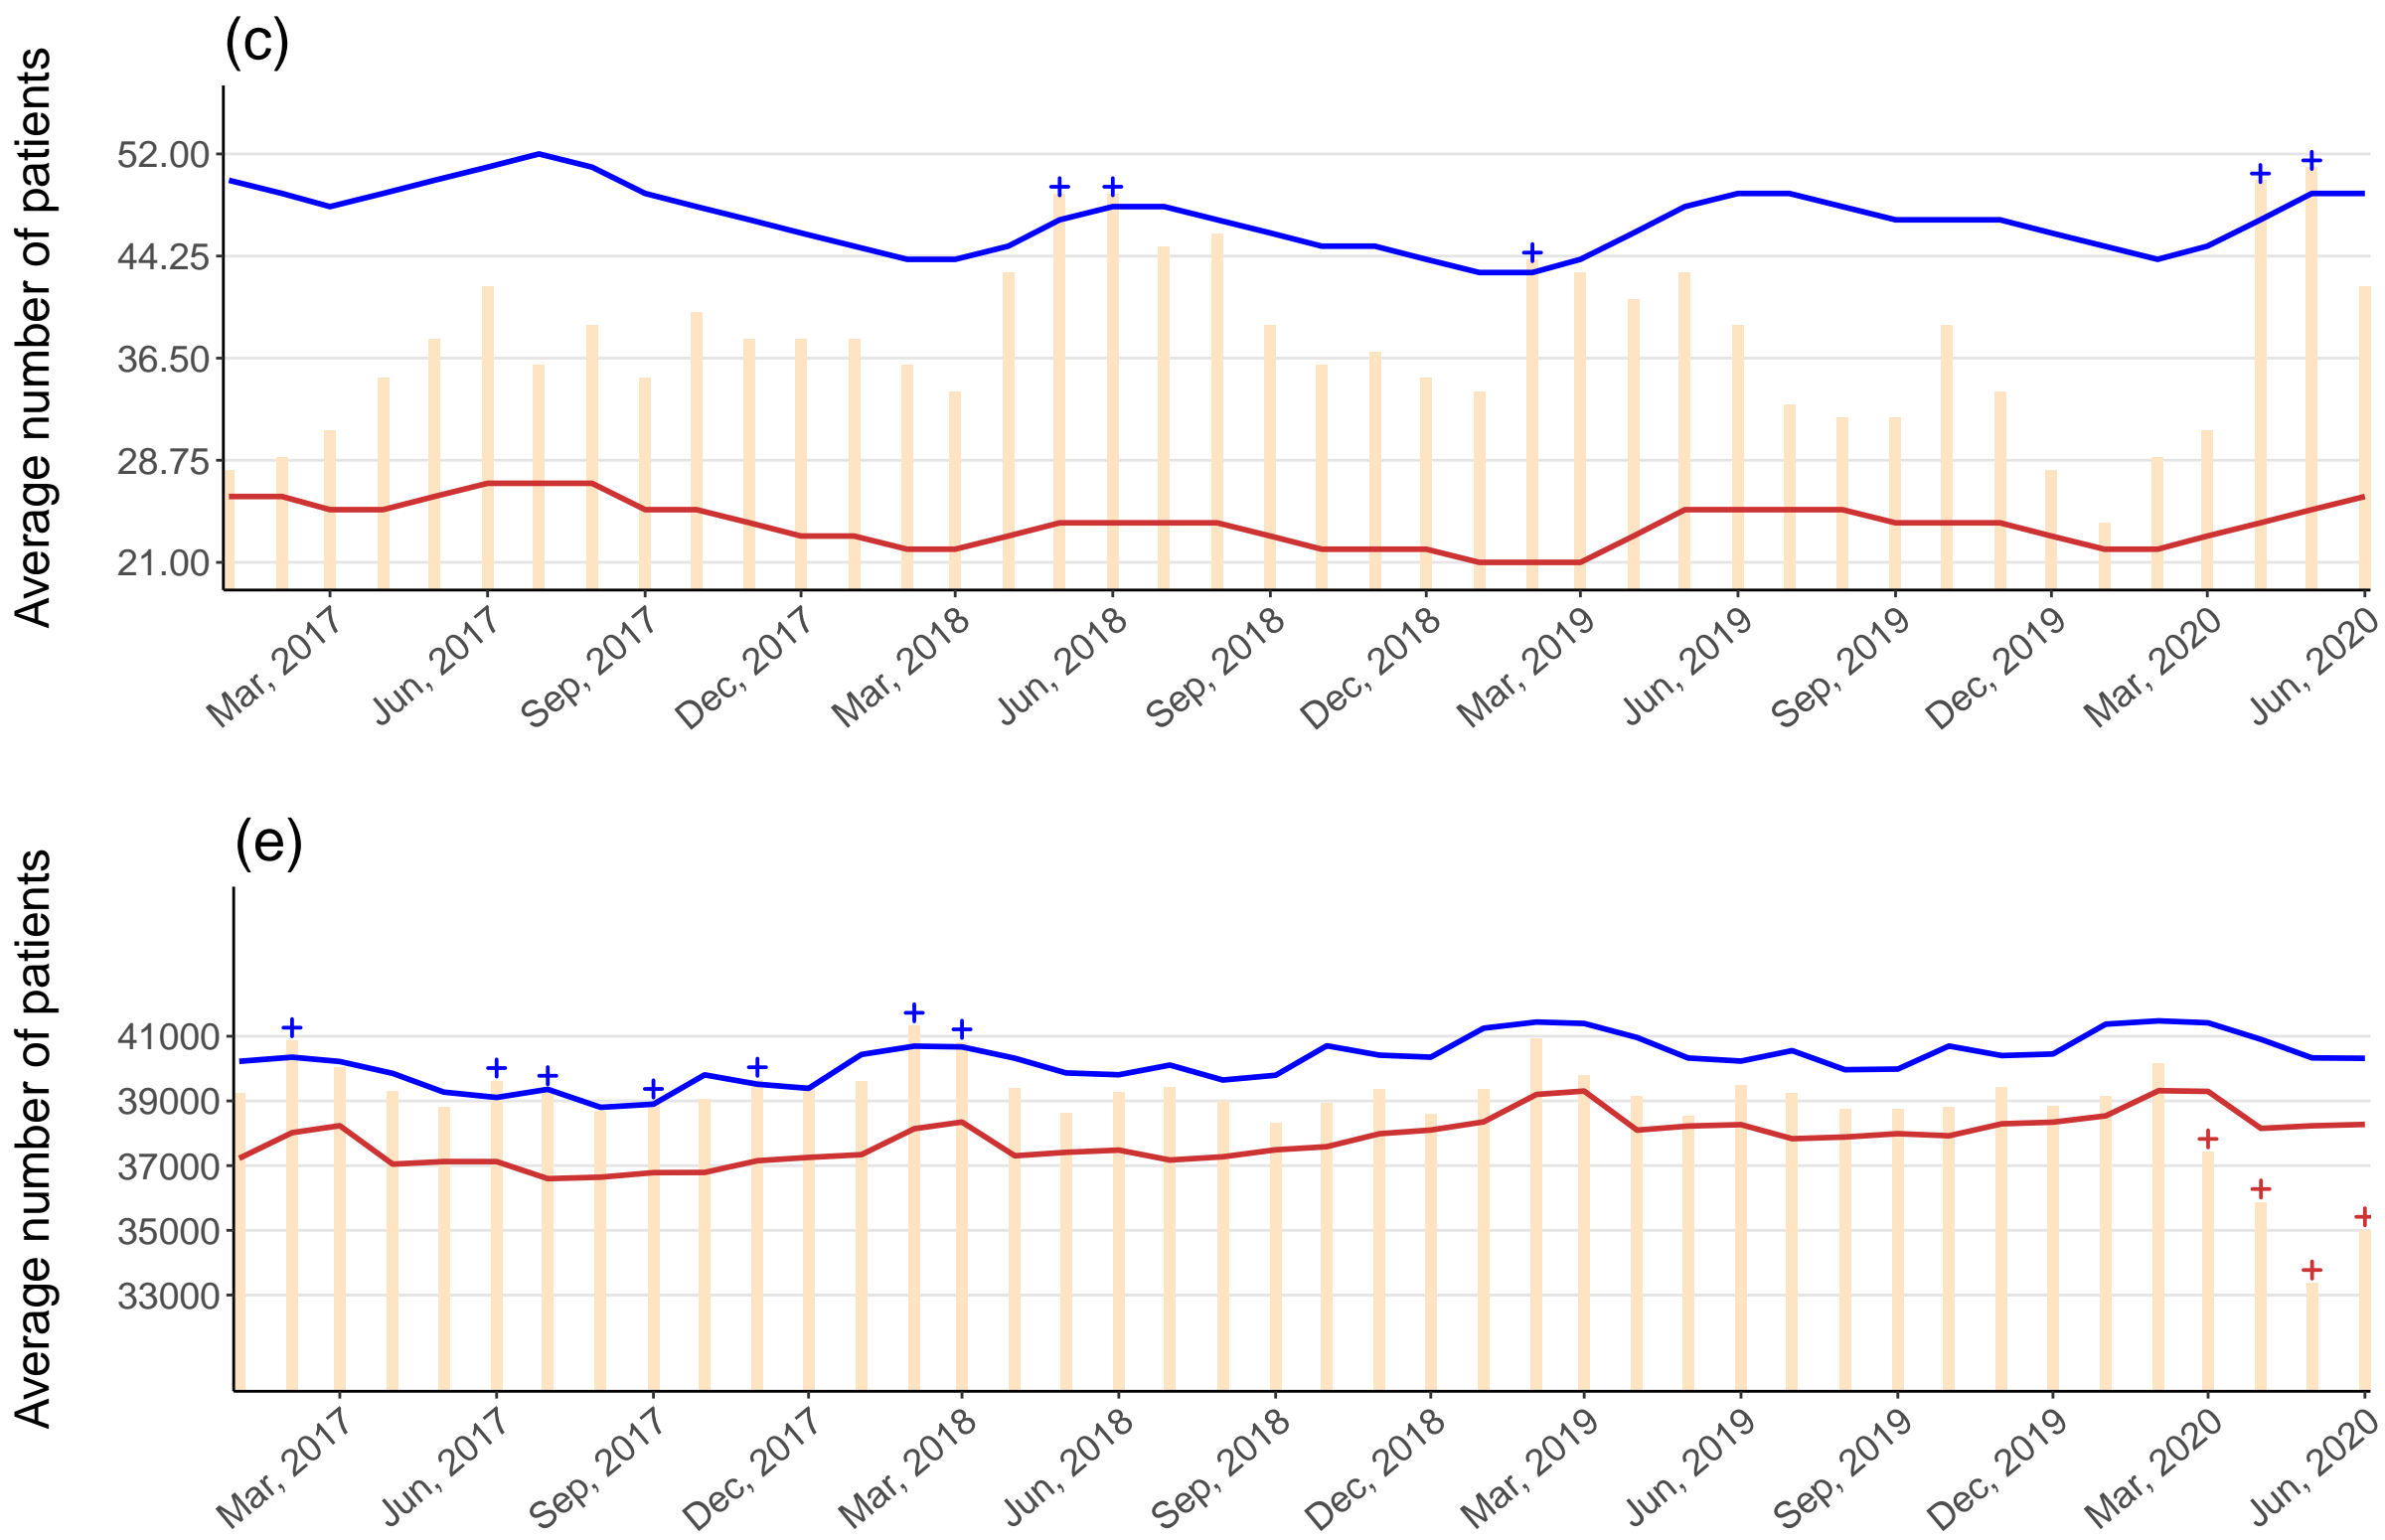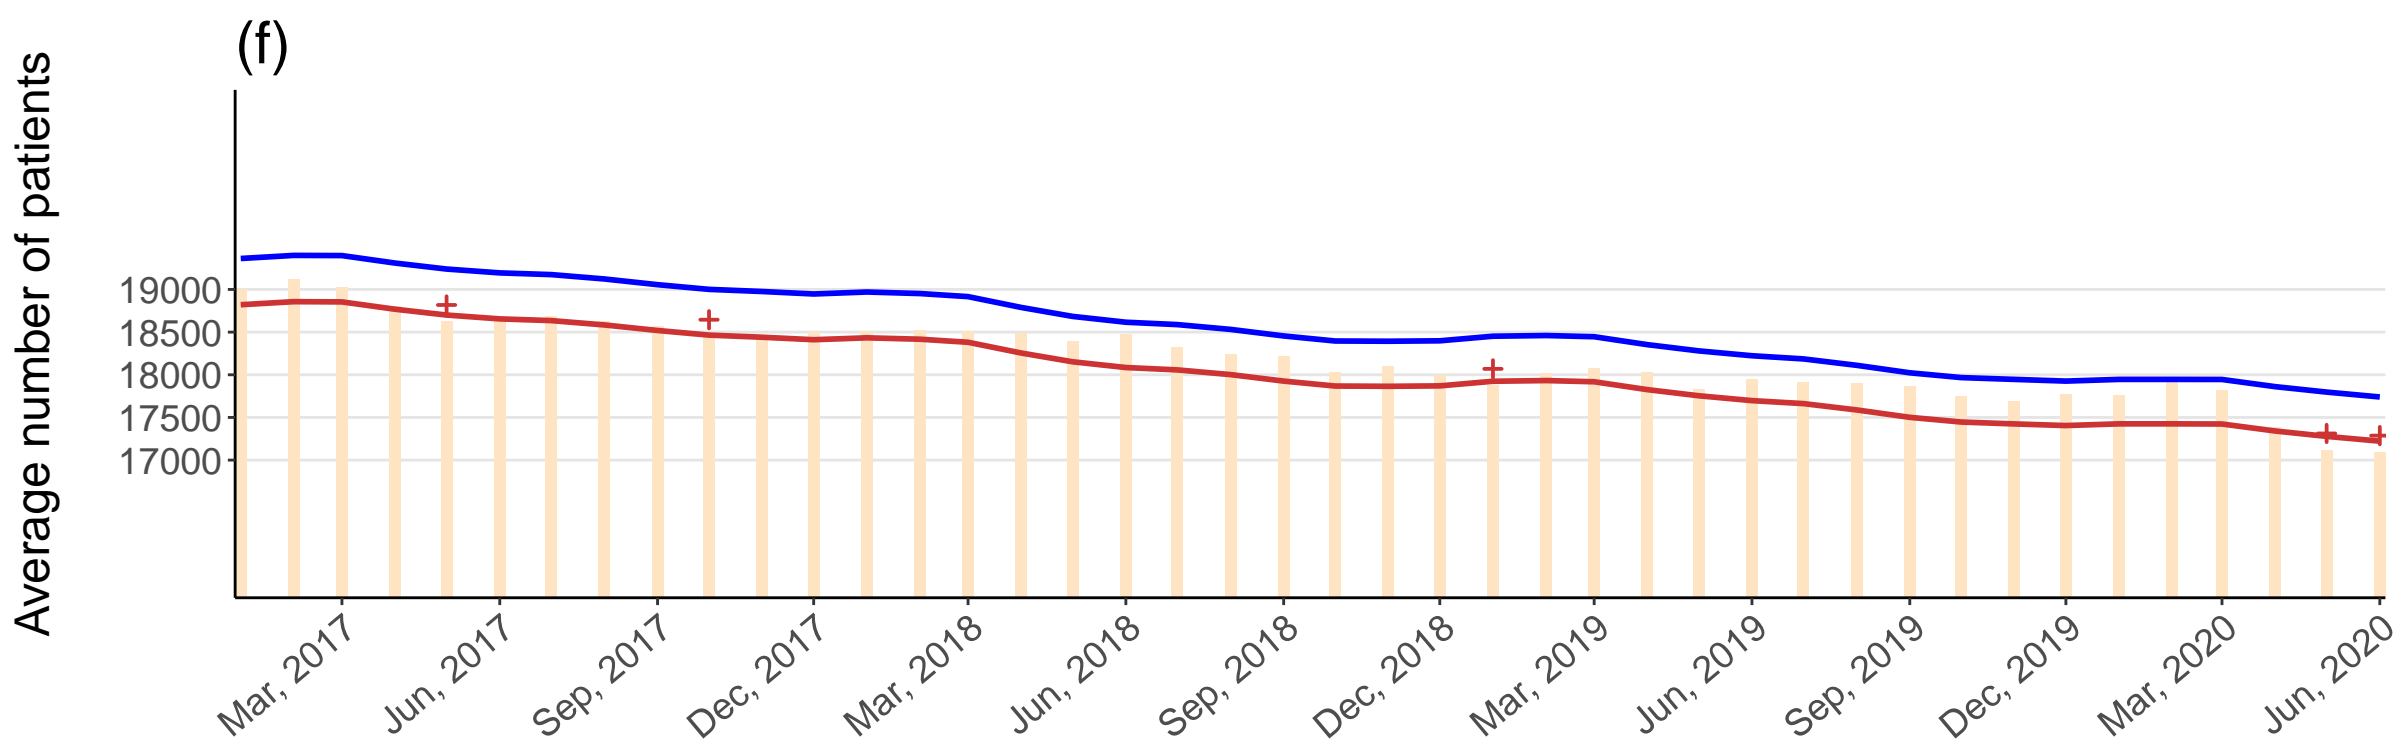

## Aomori

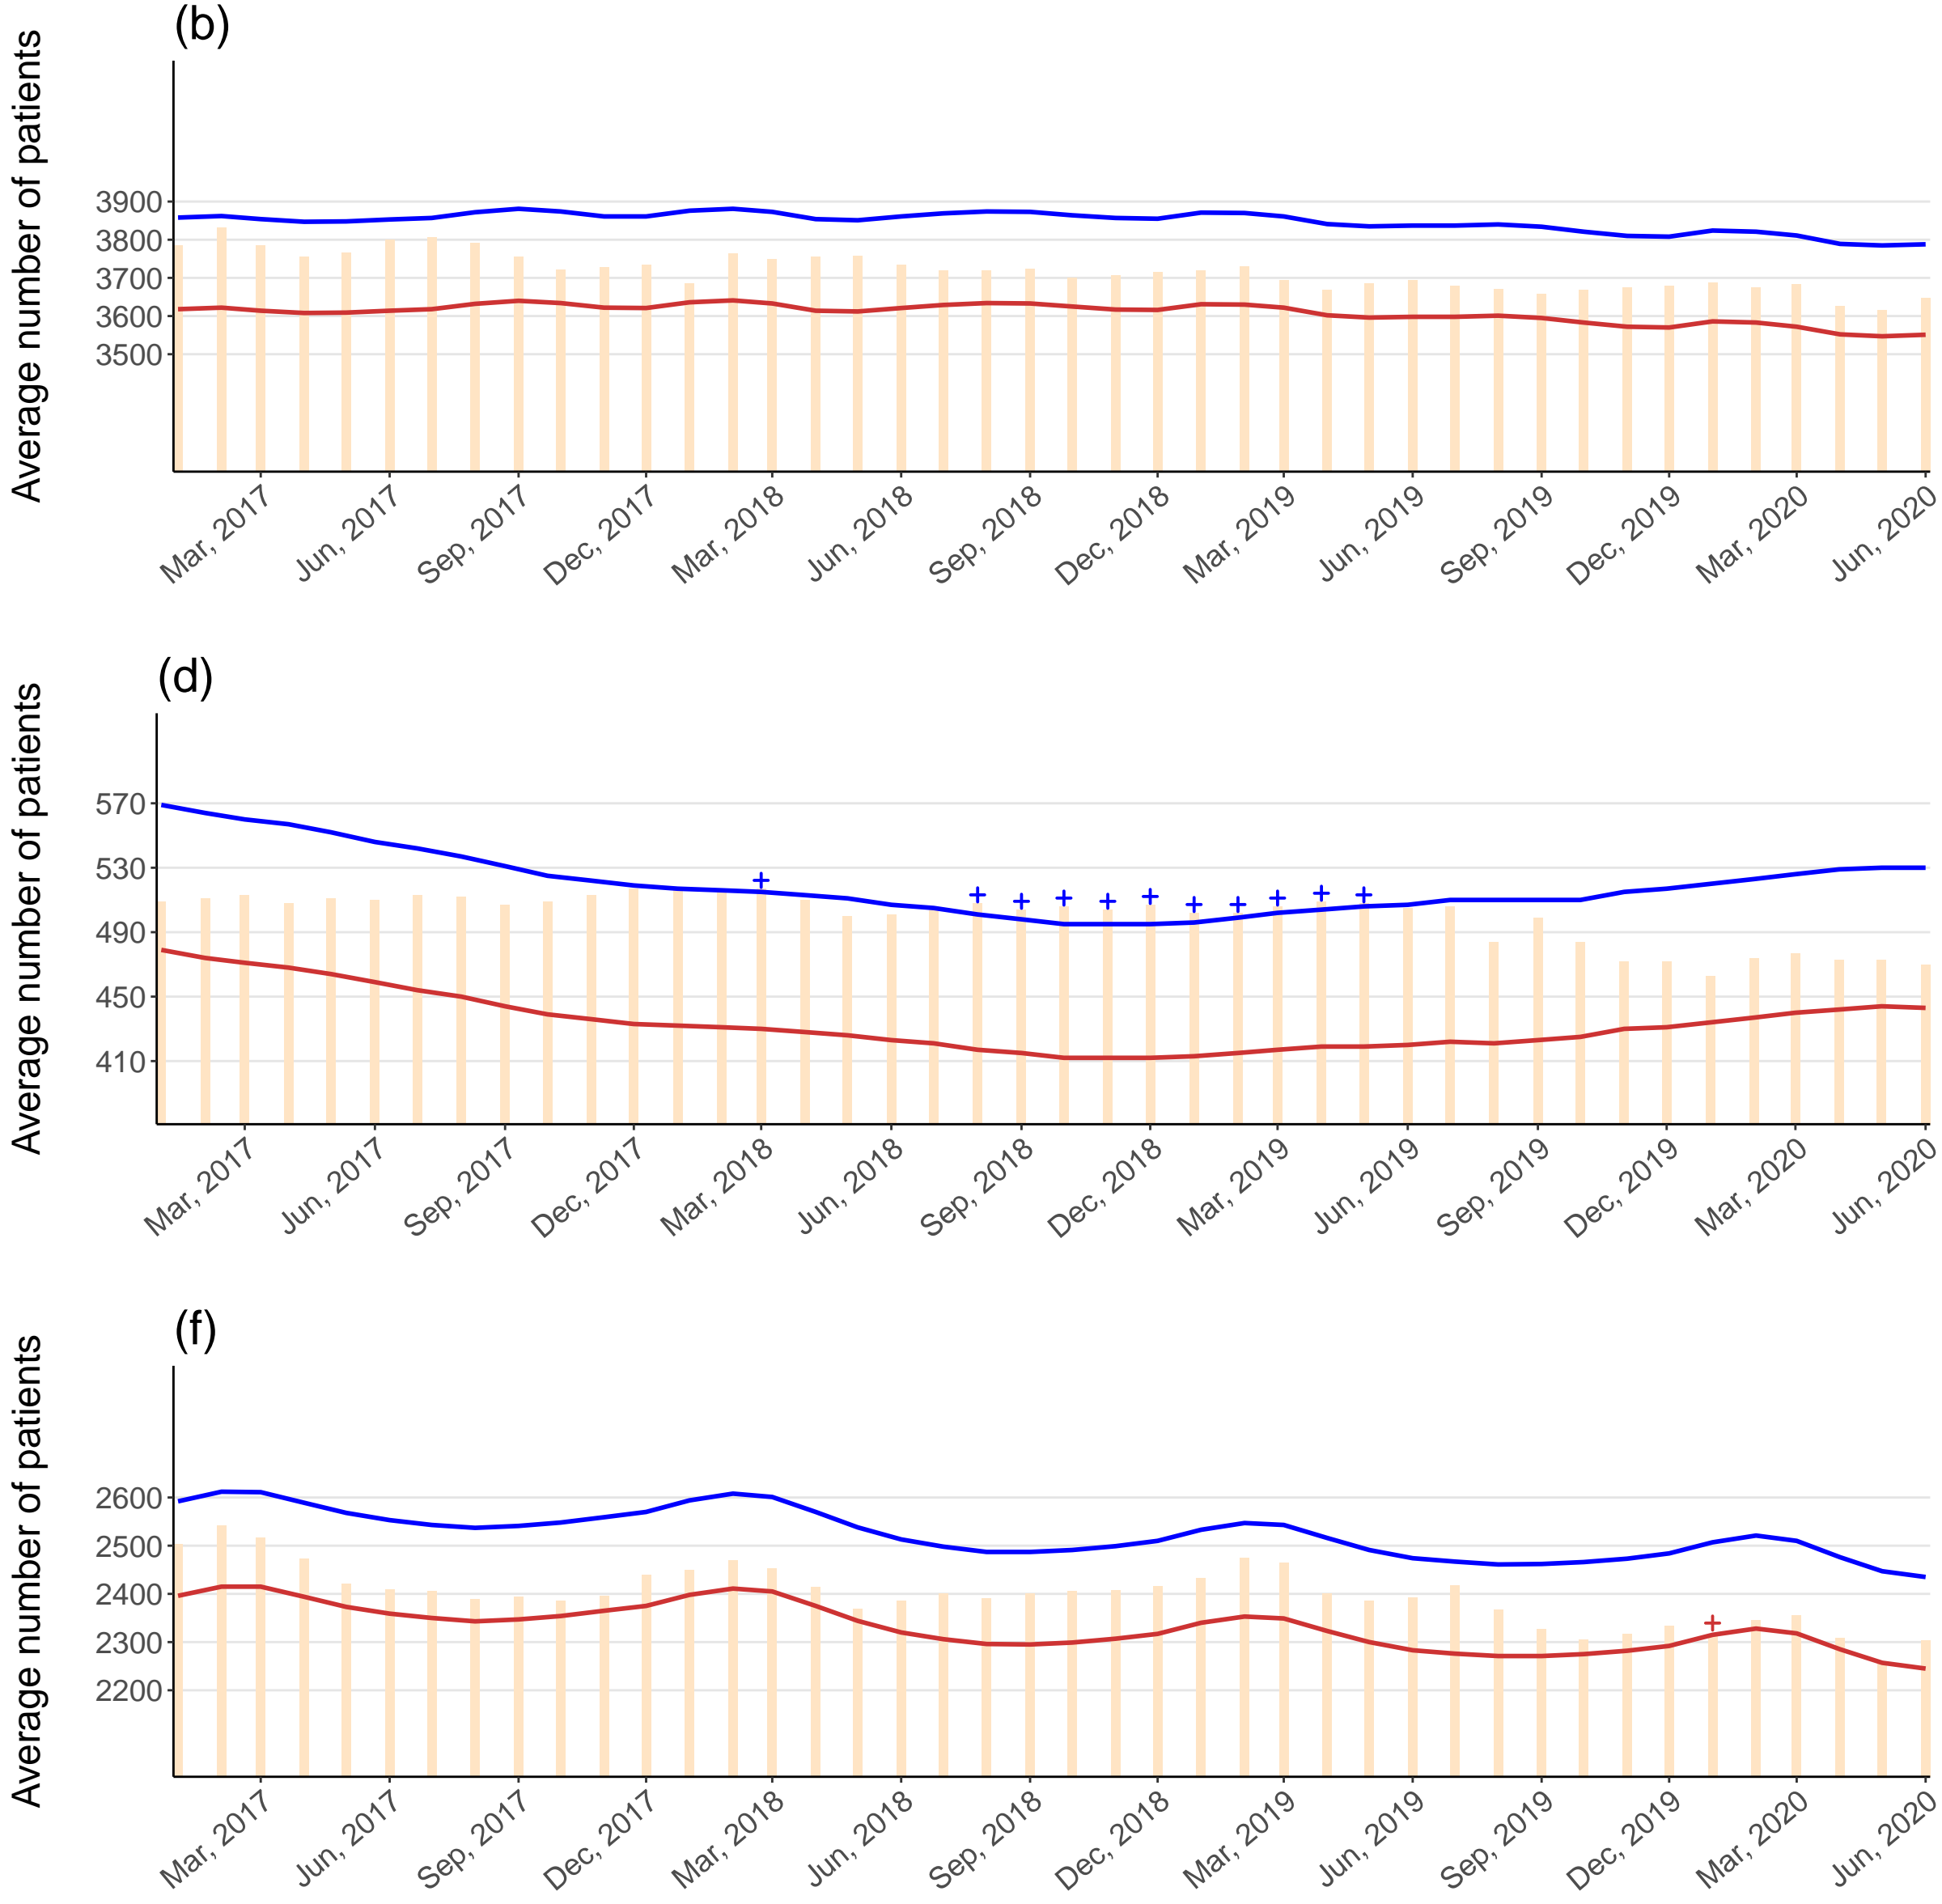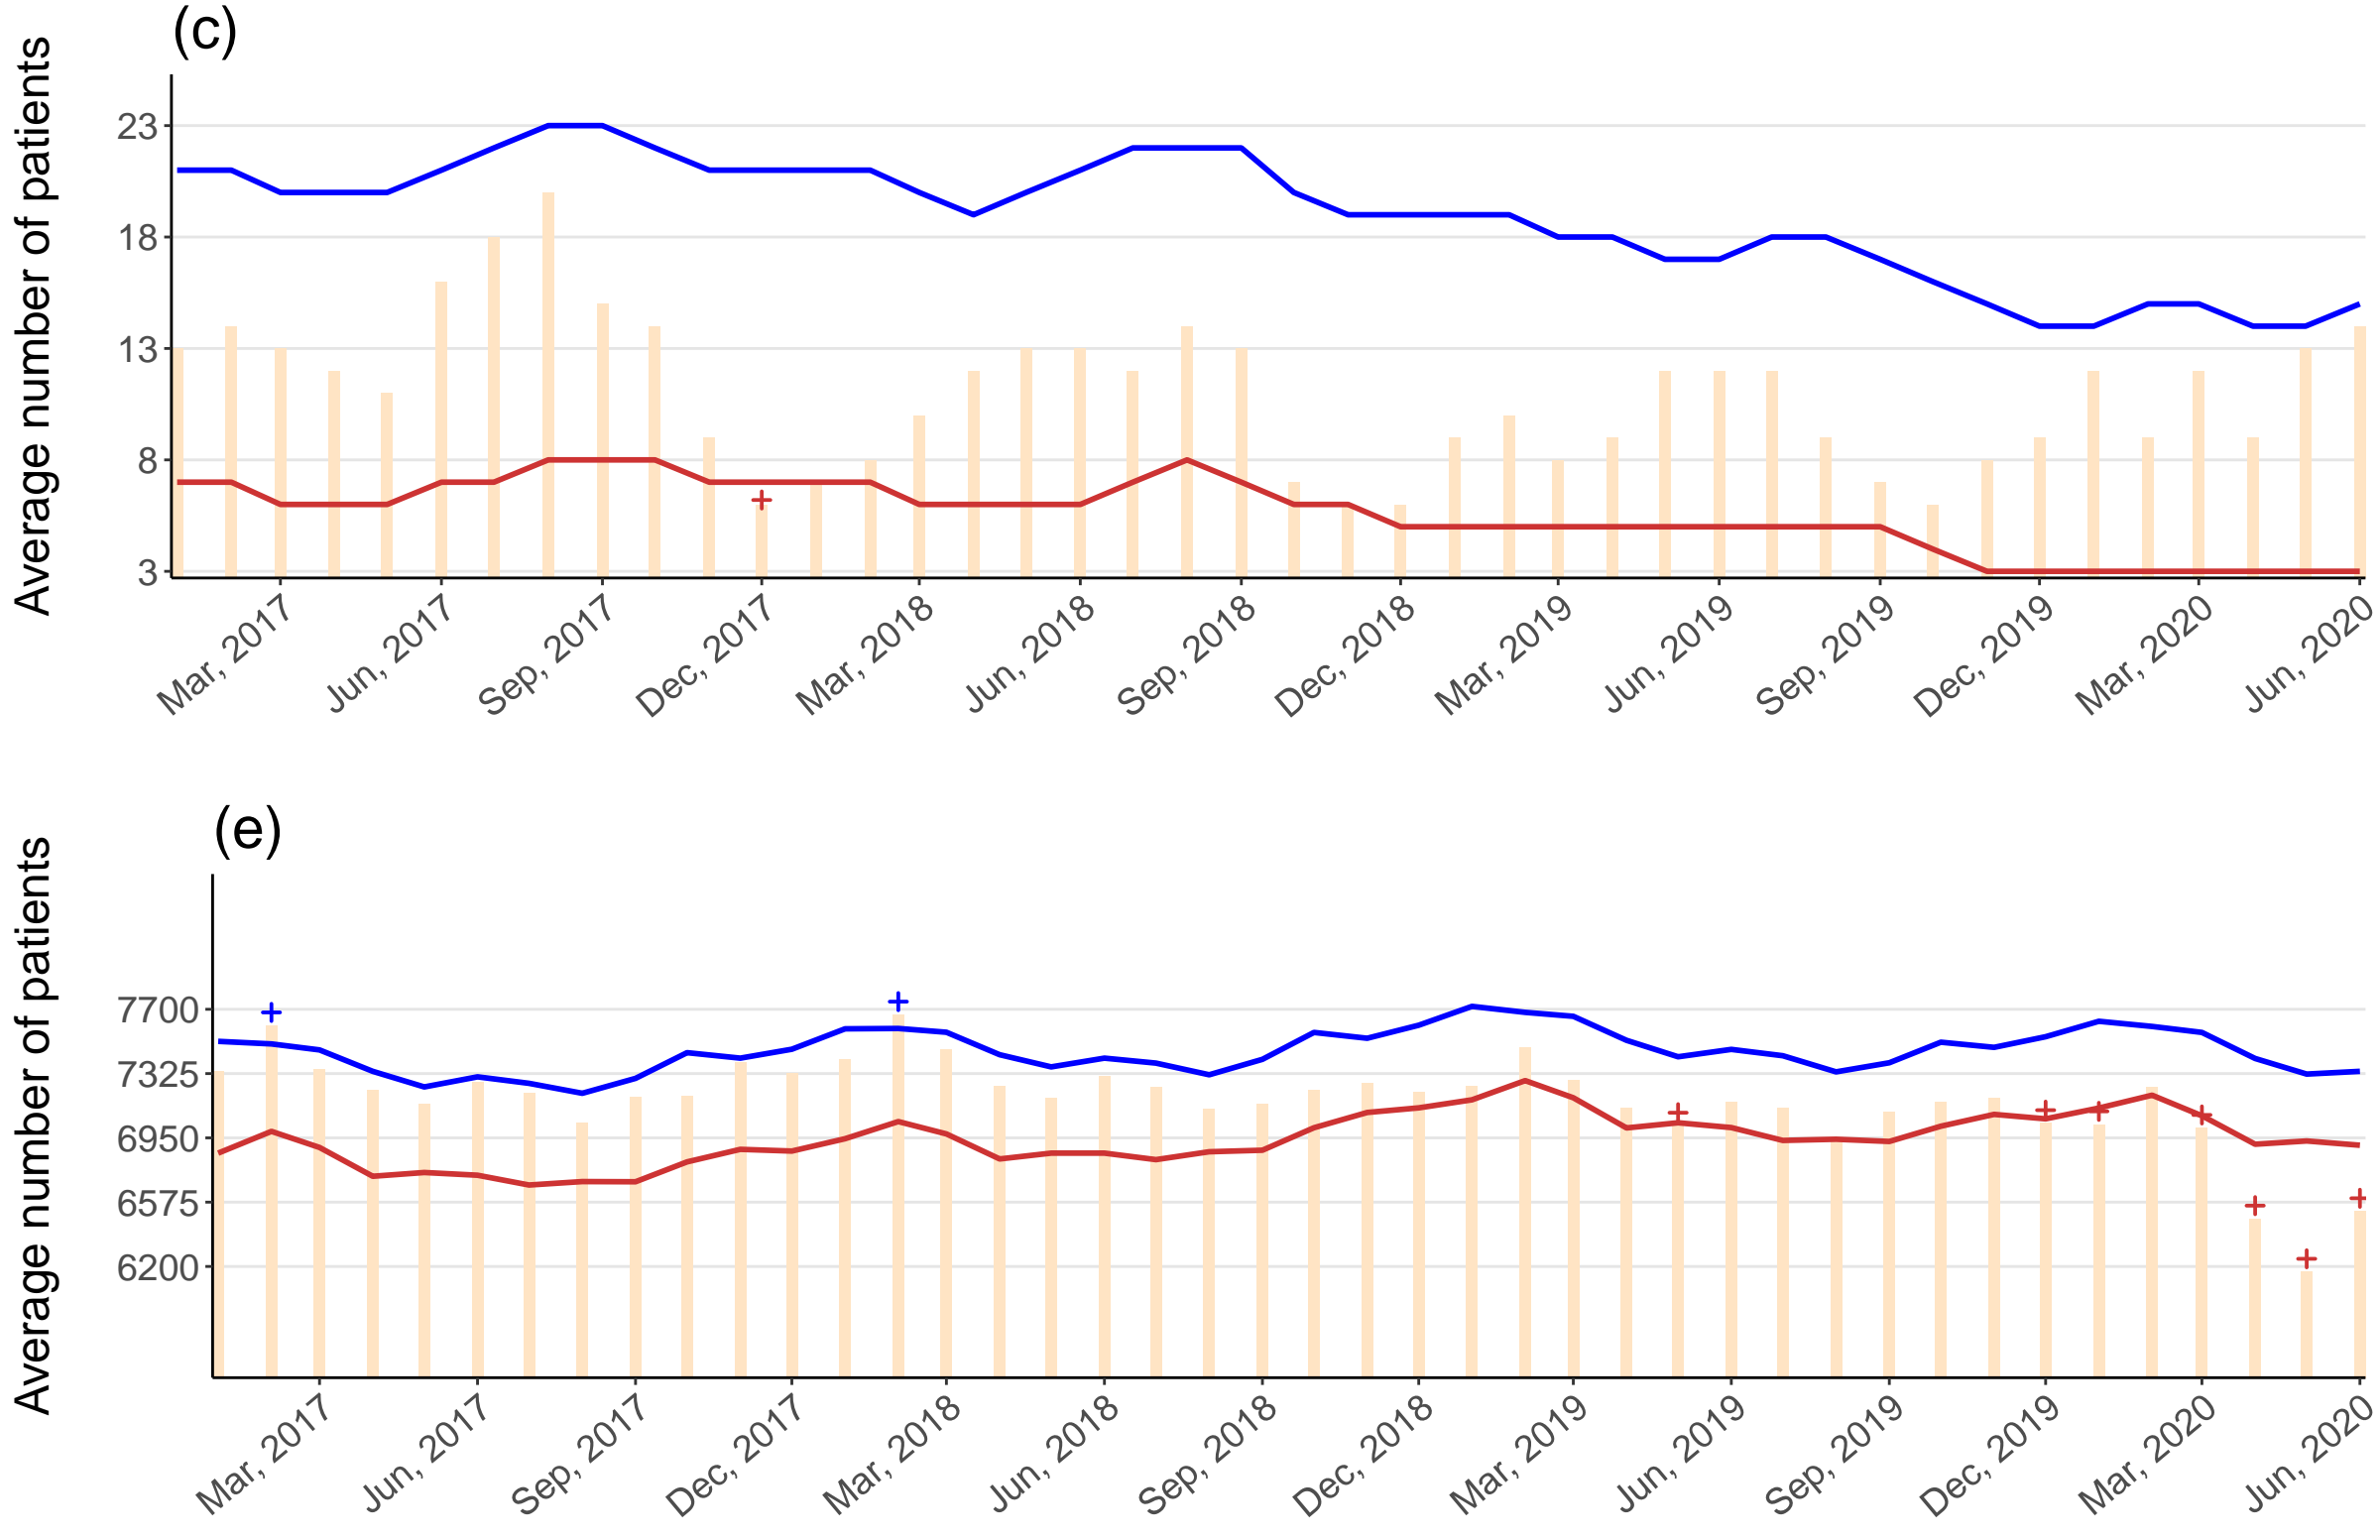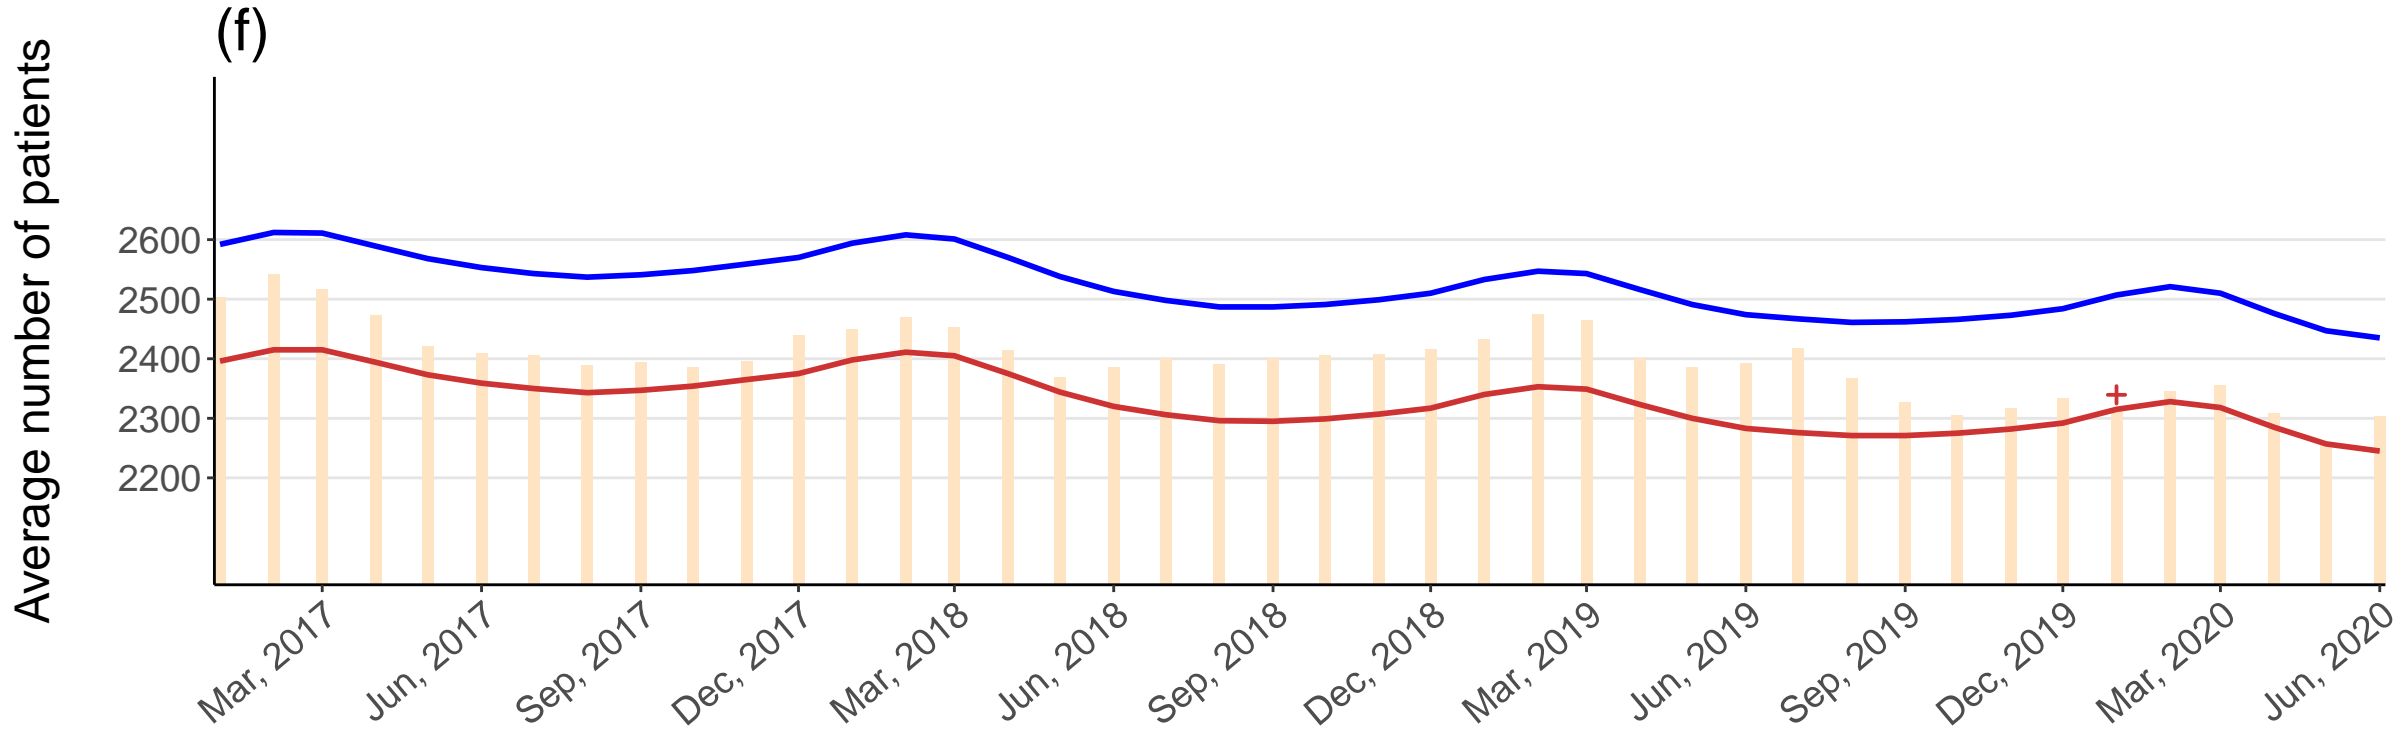

## Iwate

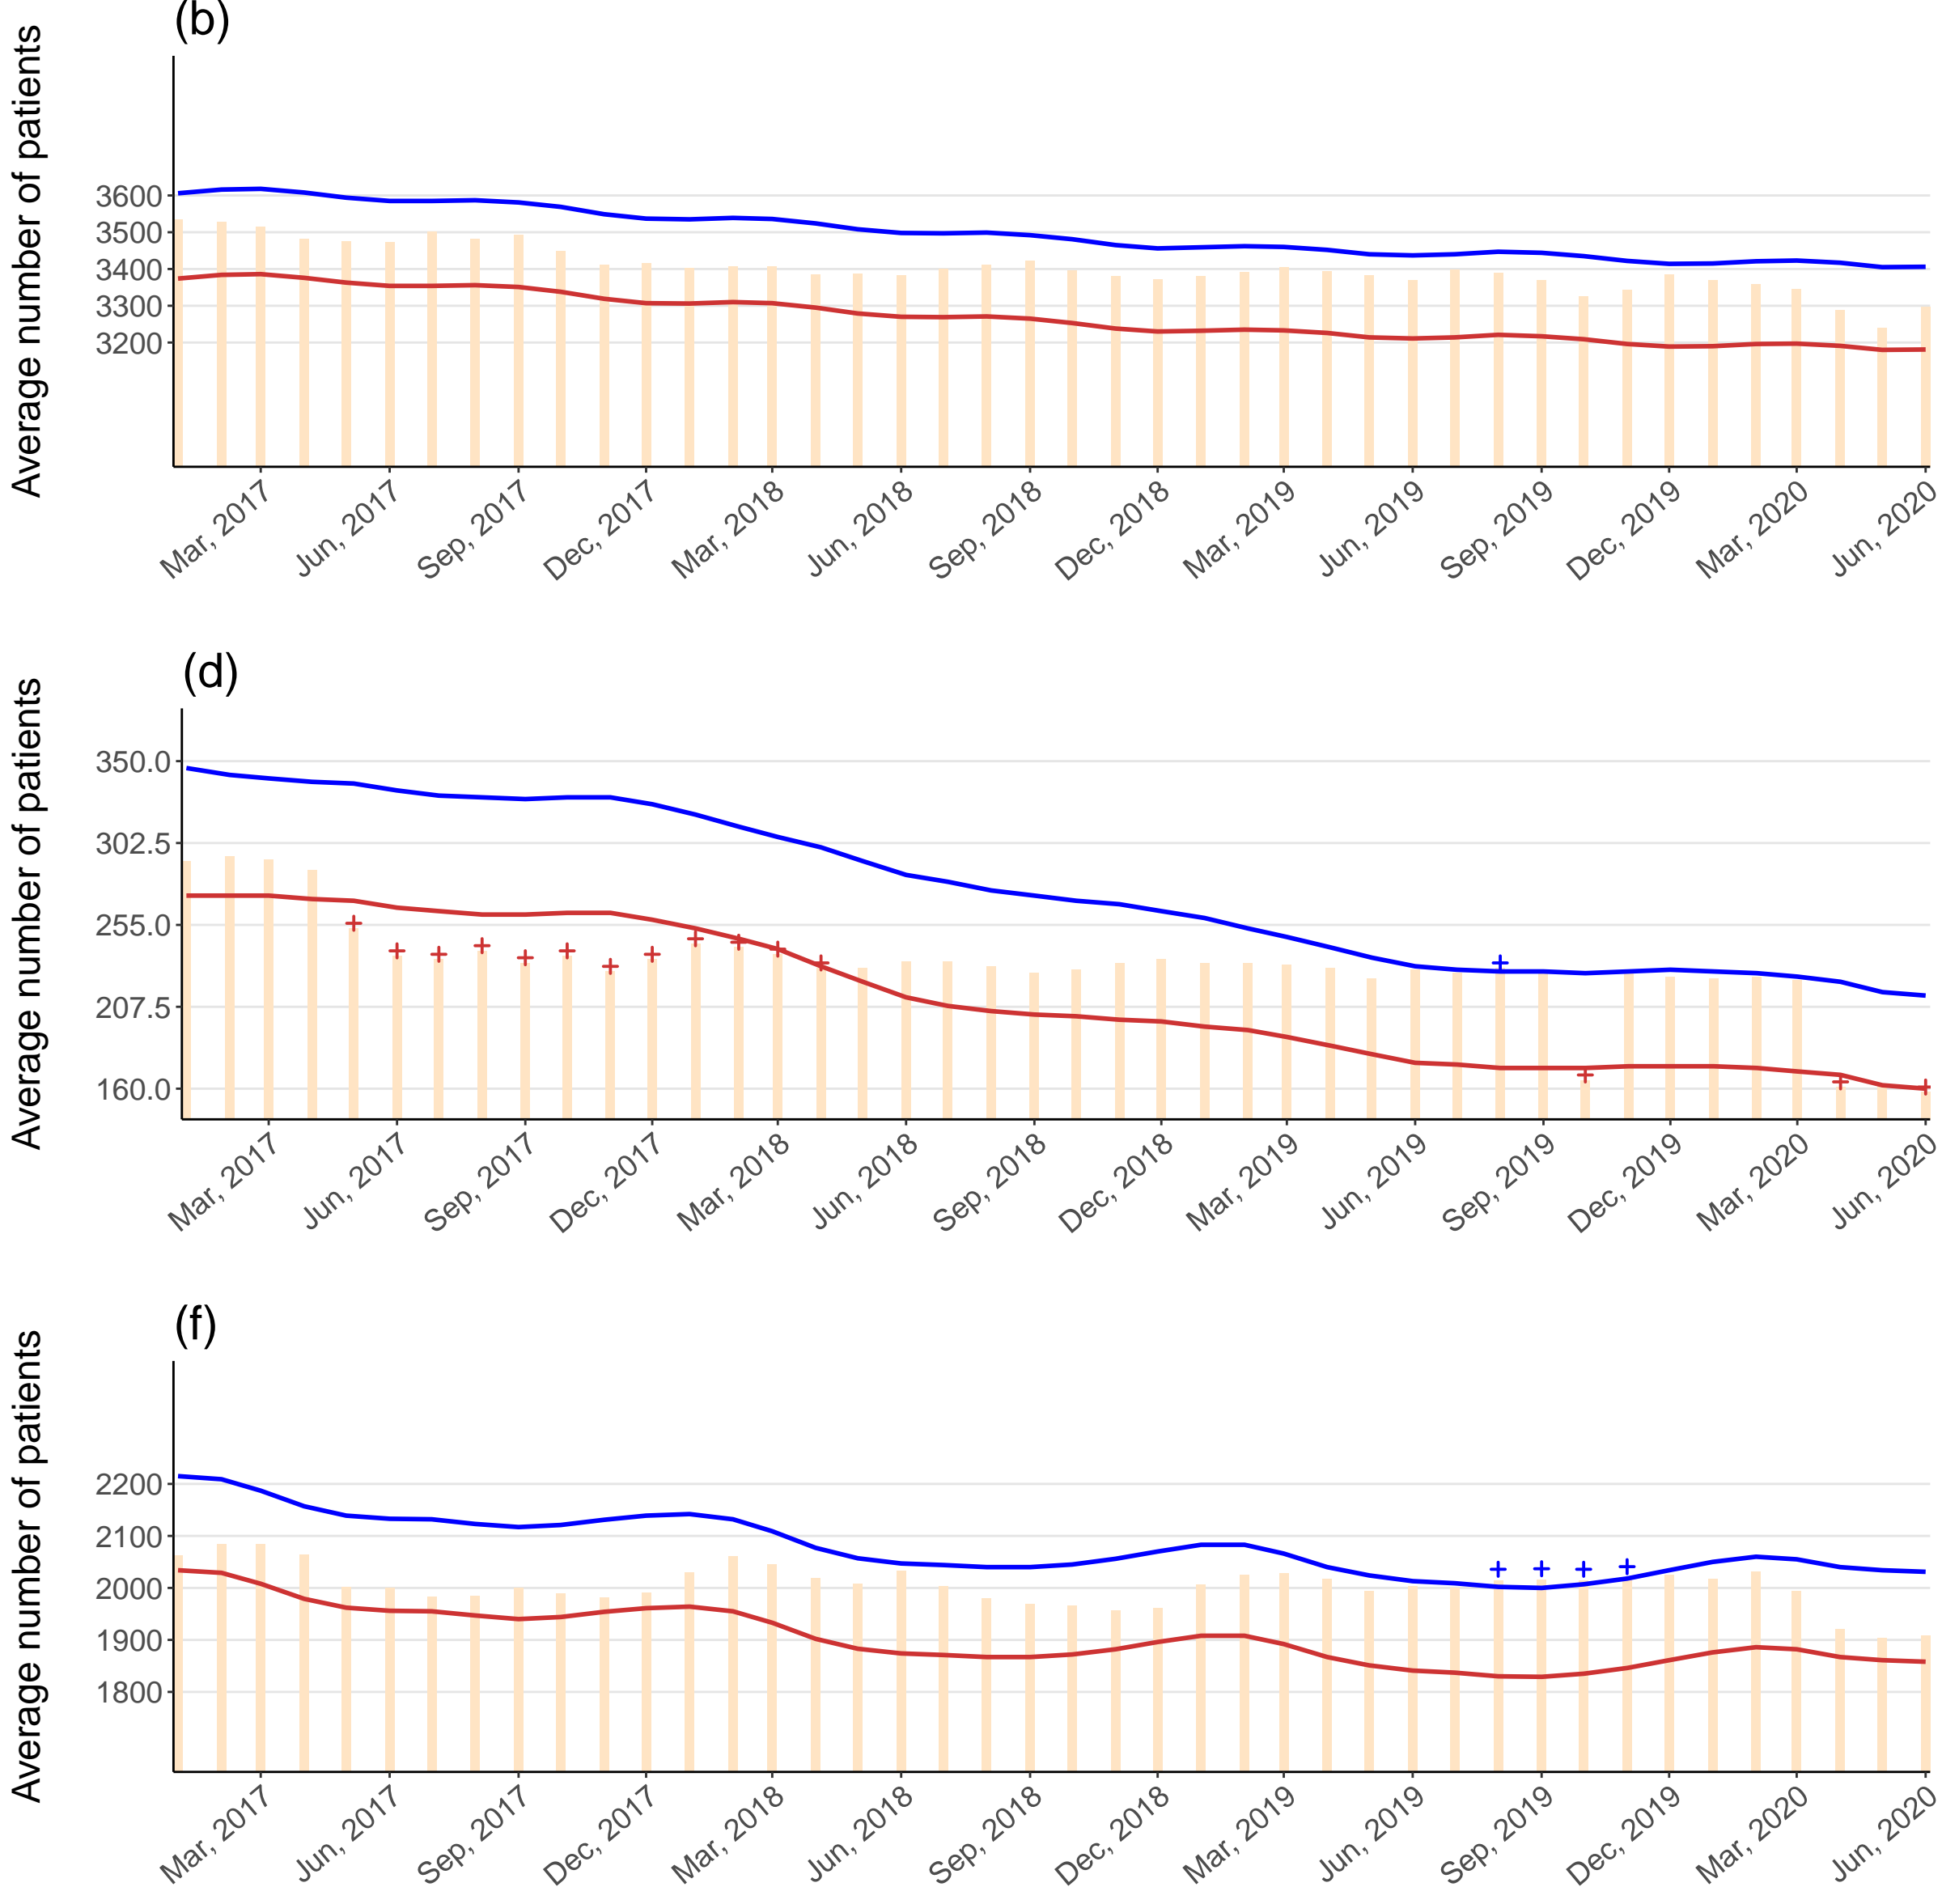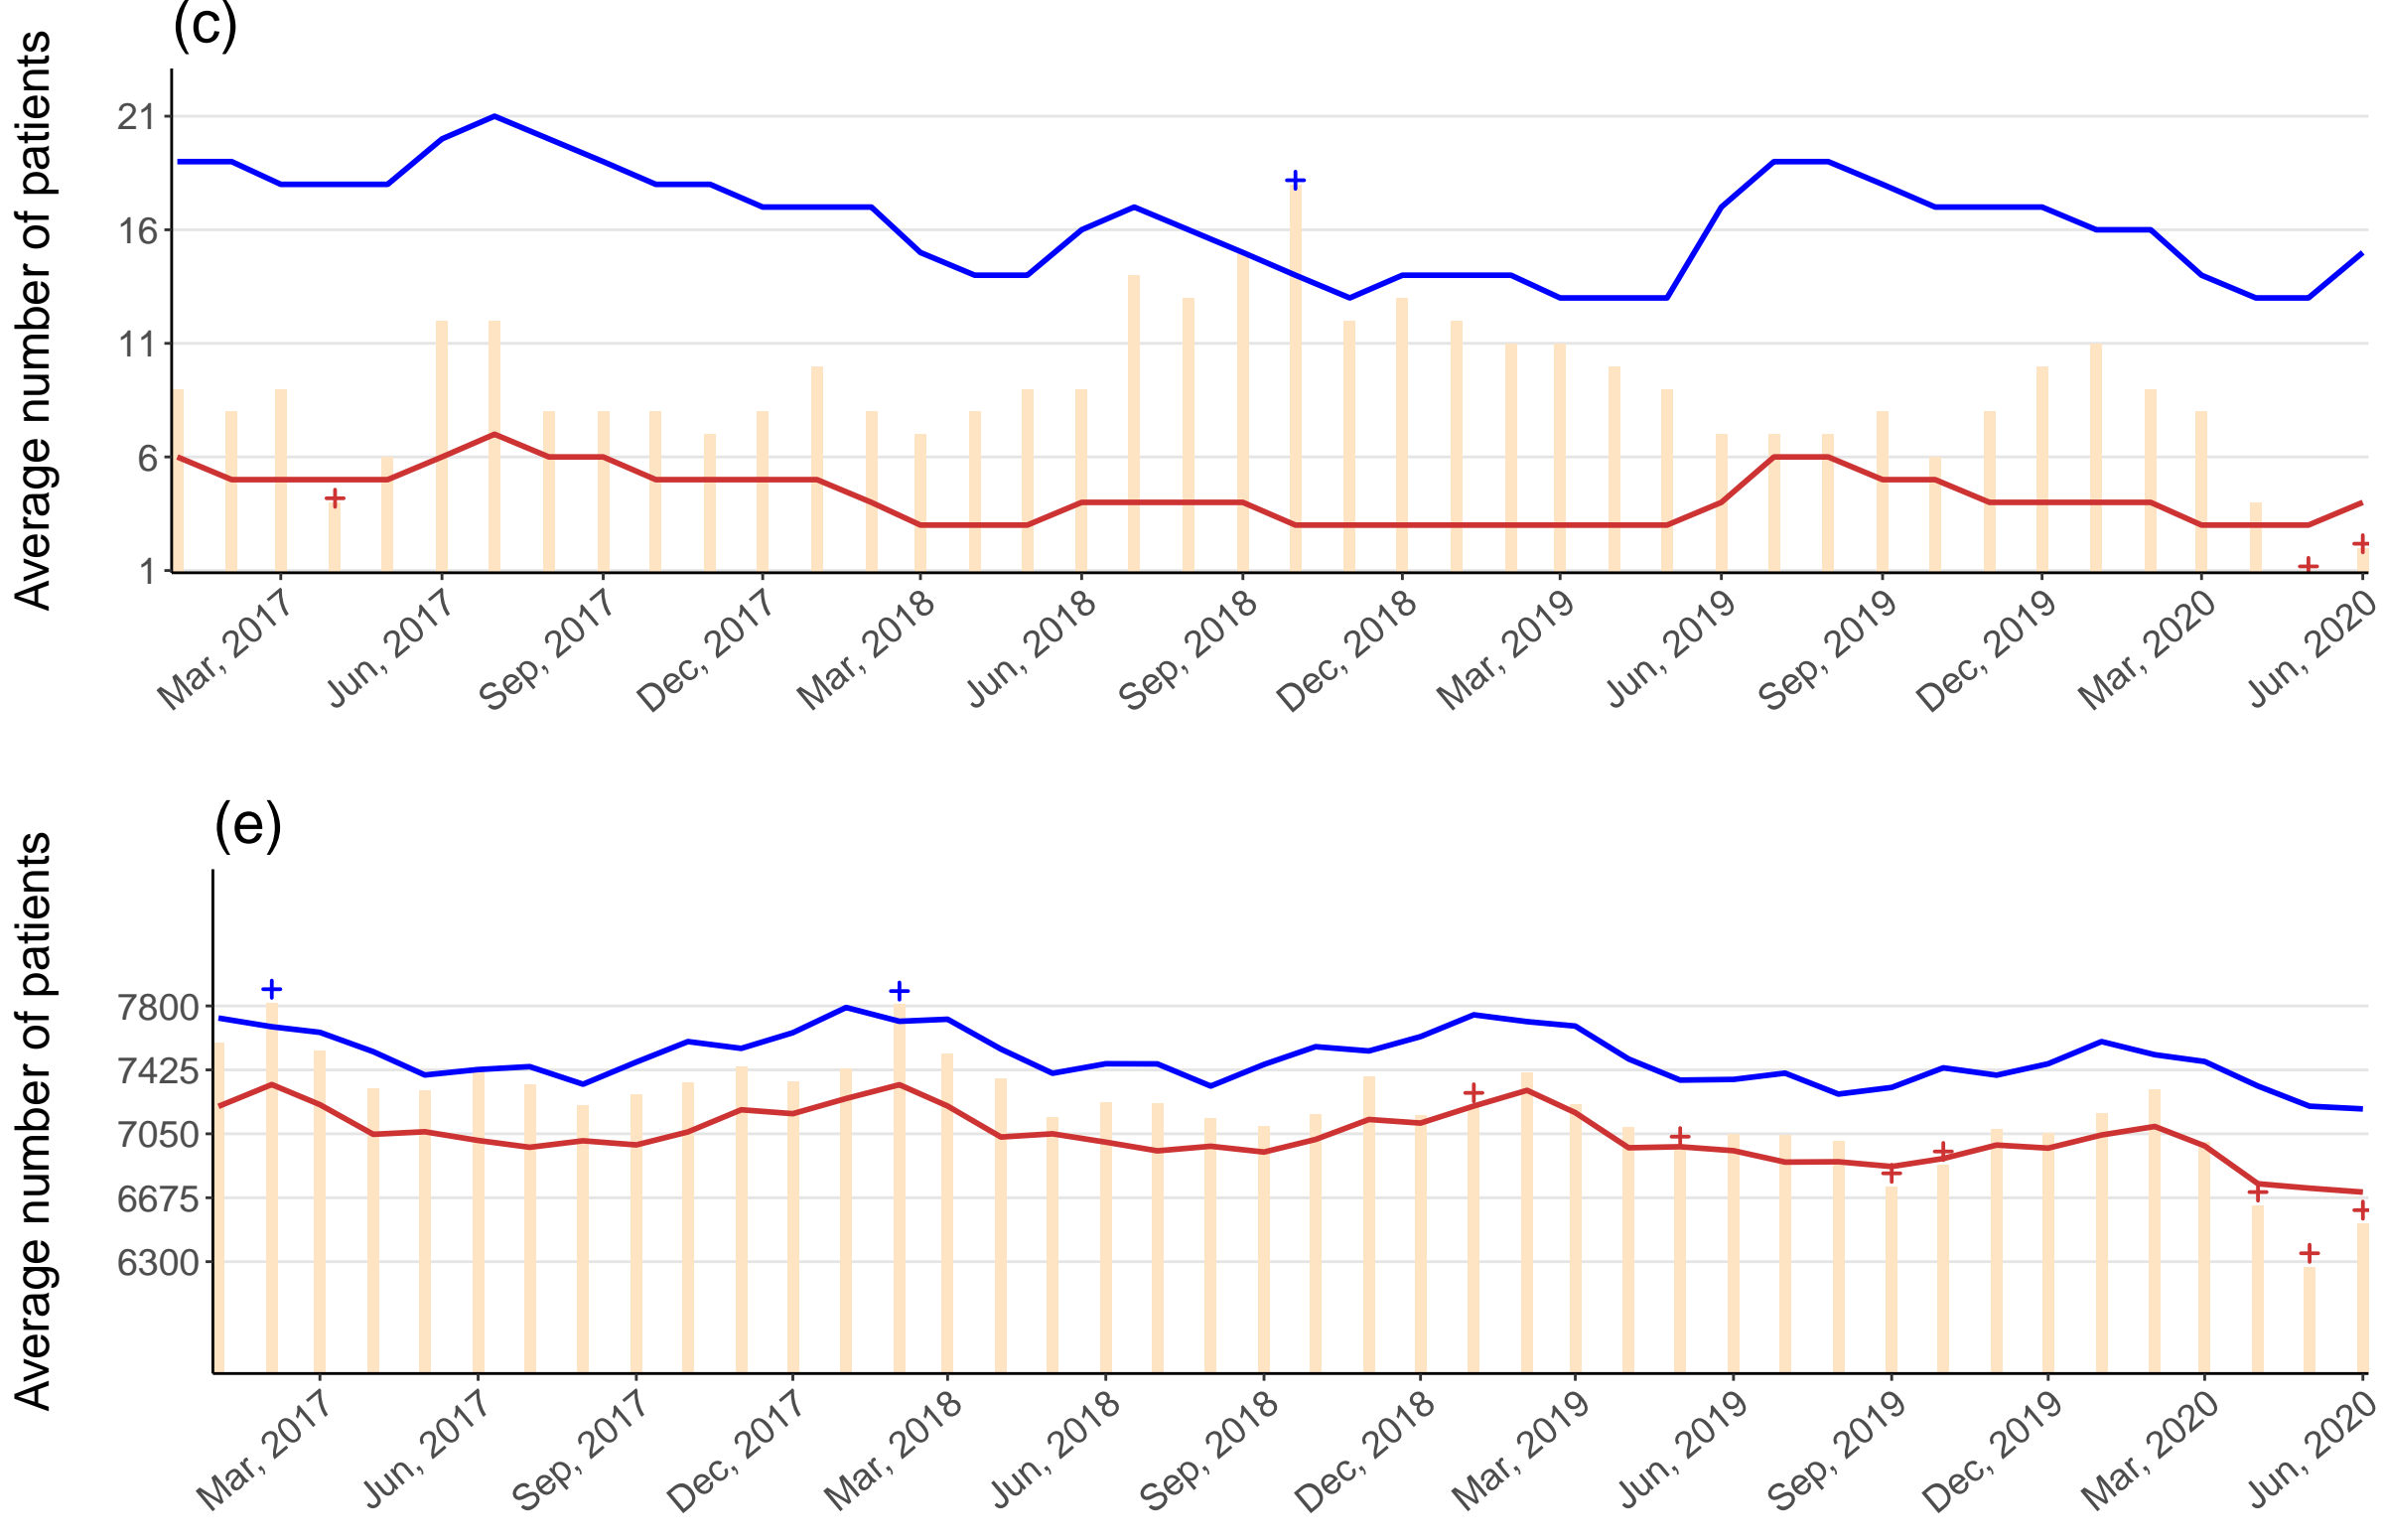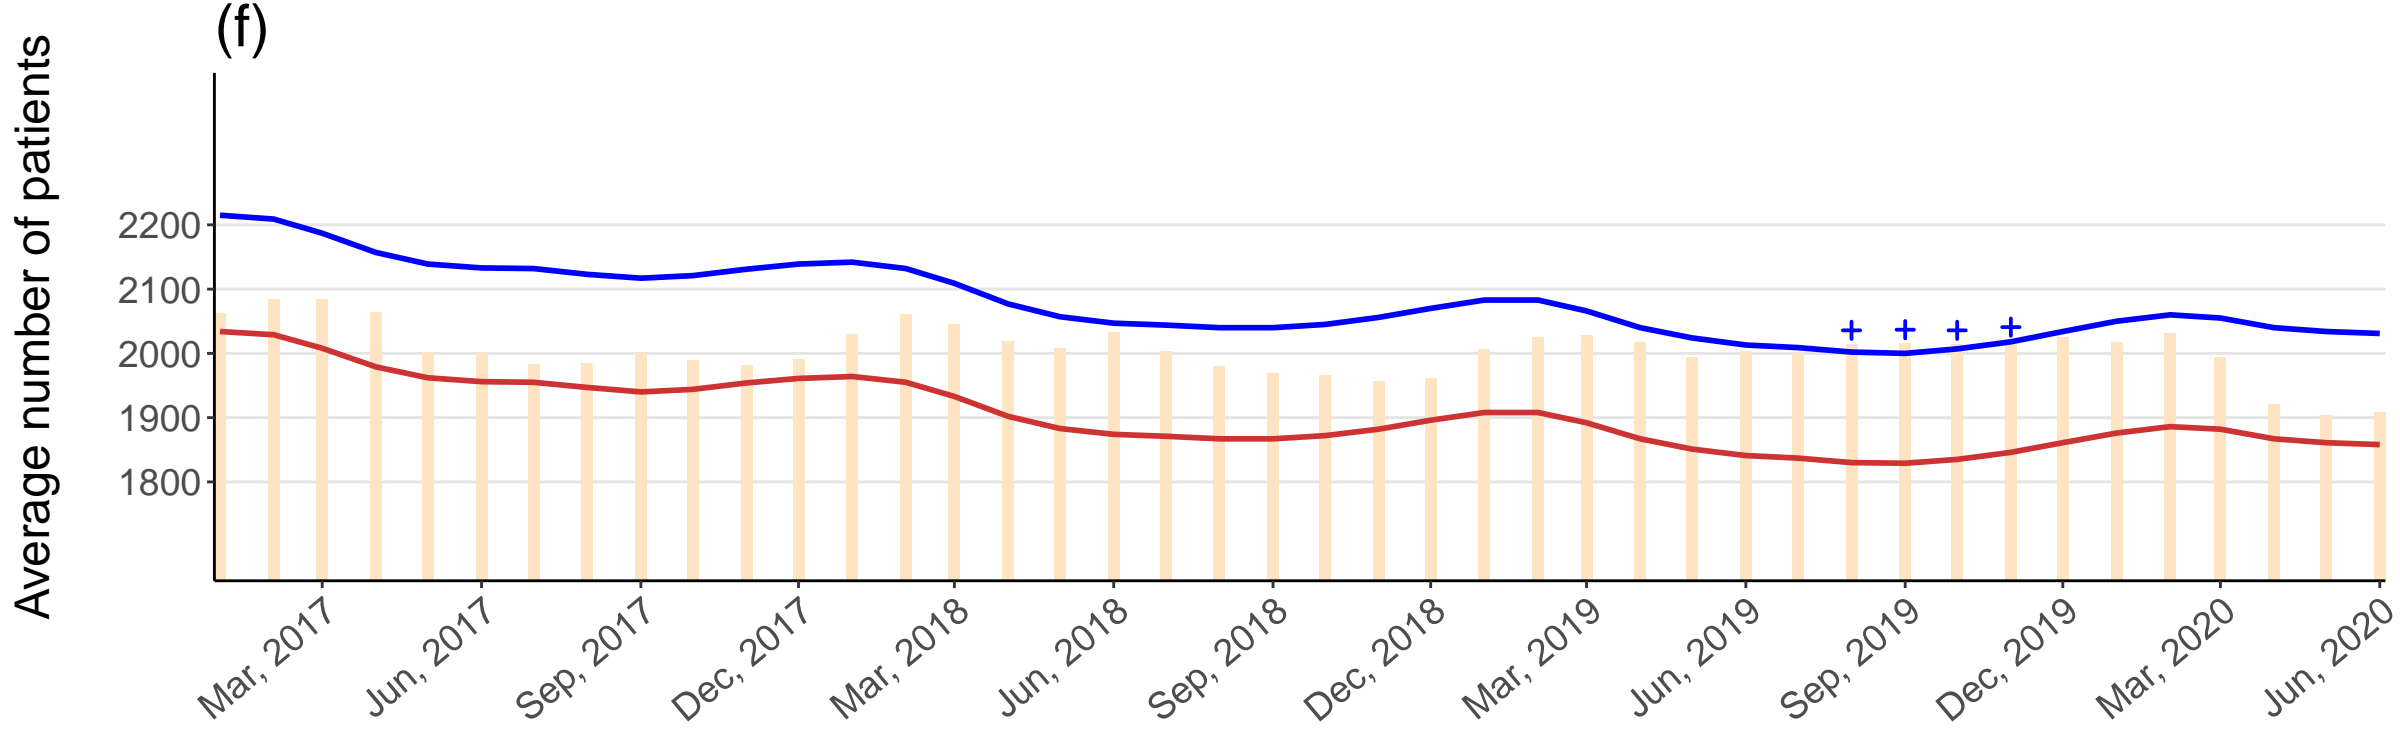

Miyagi

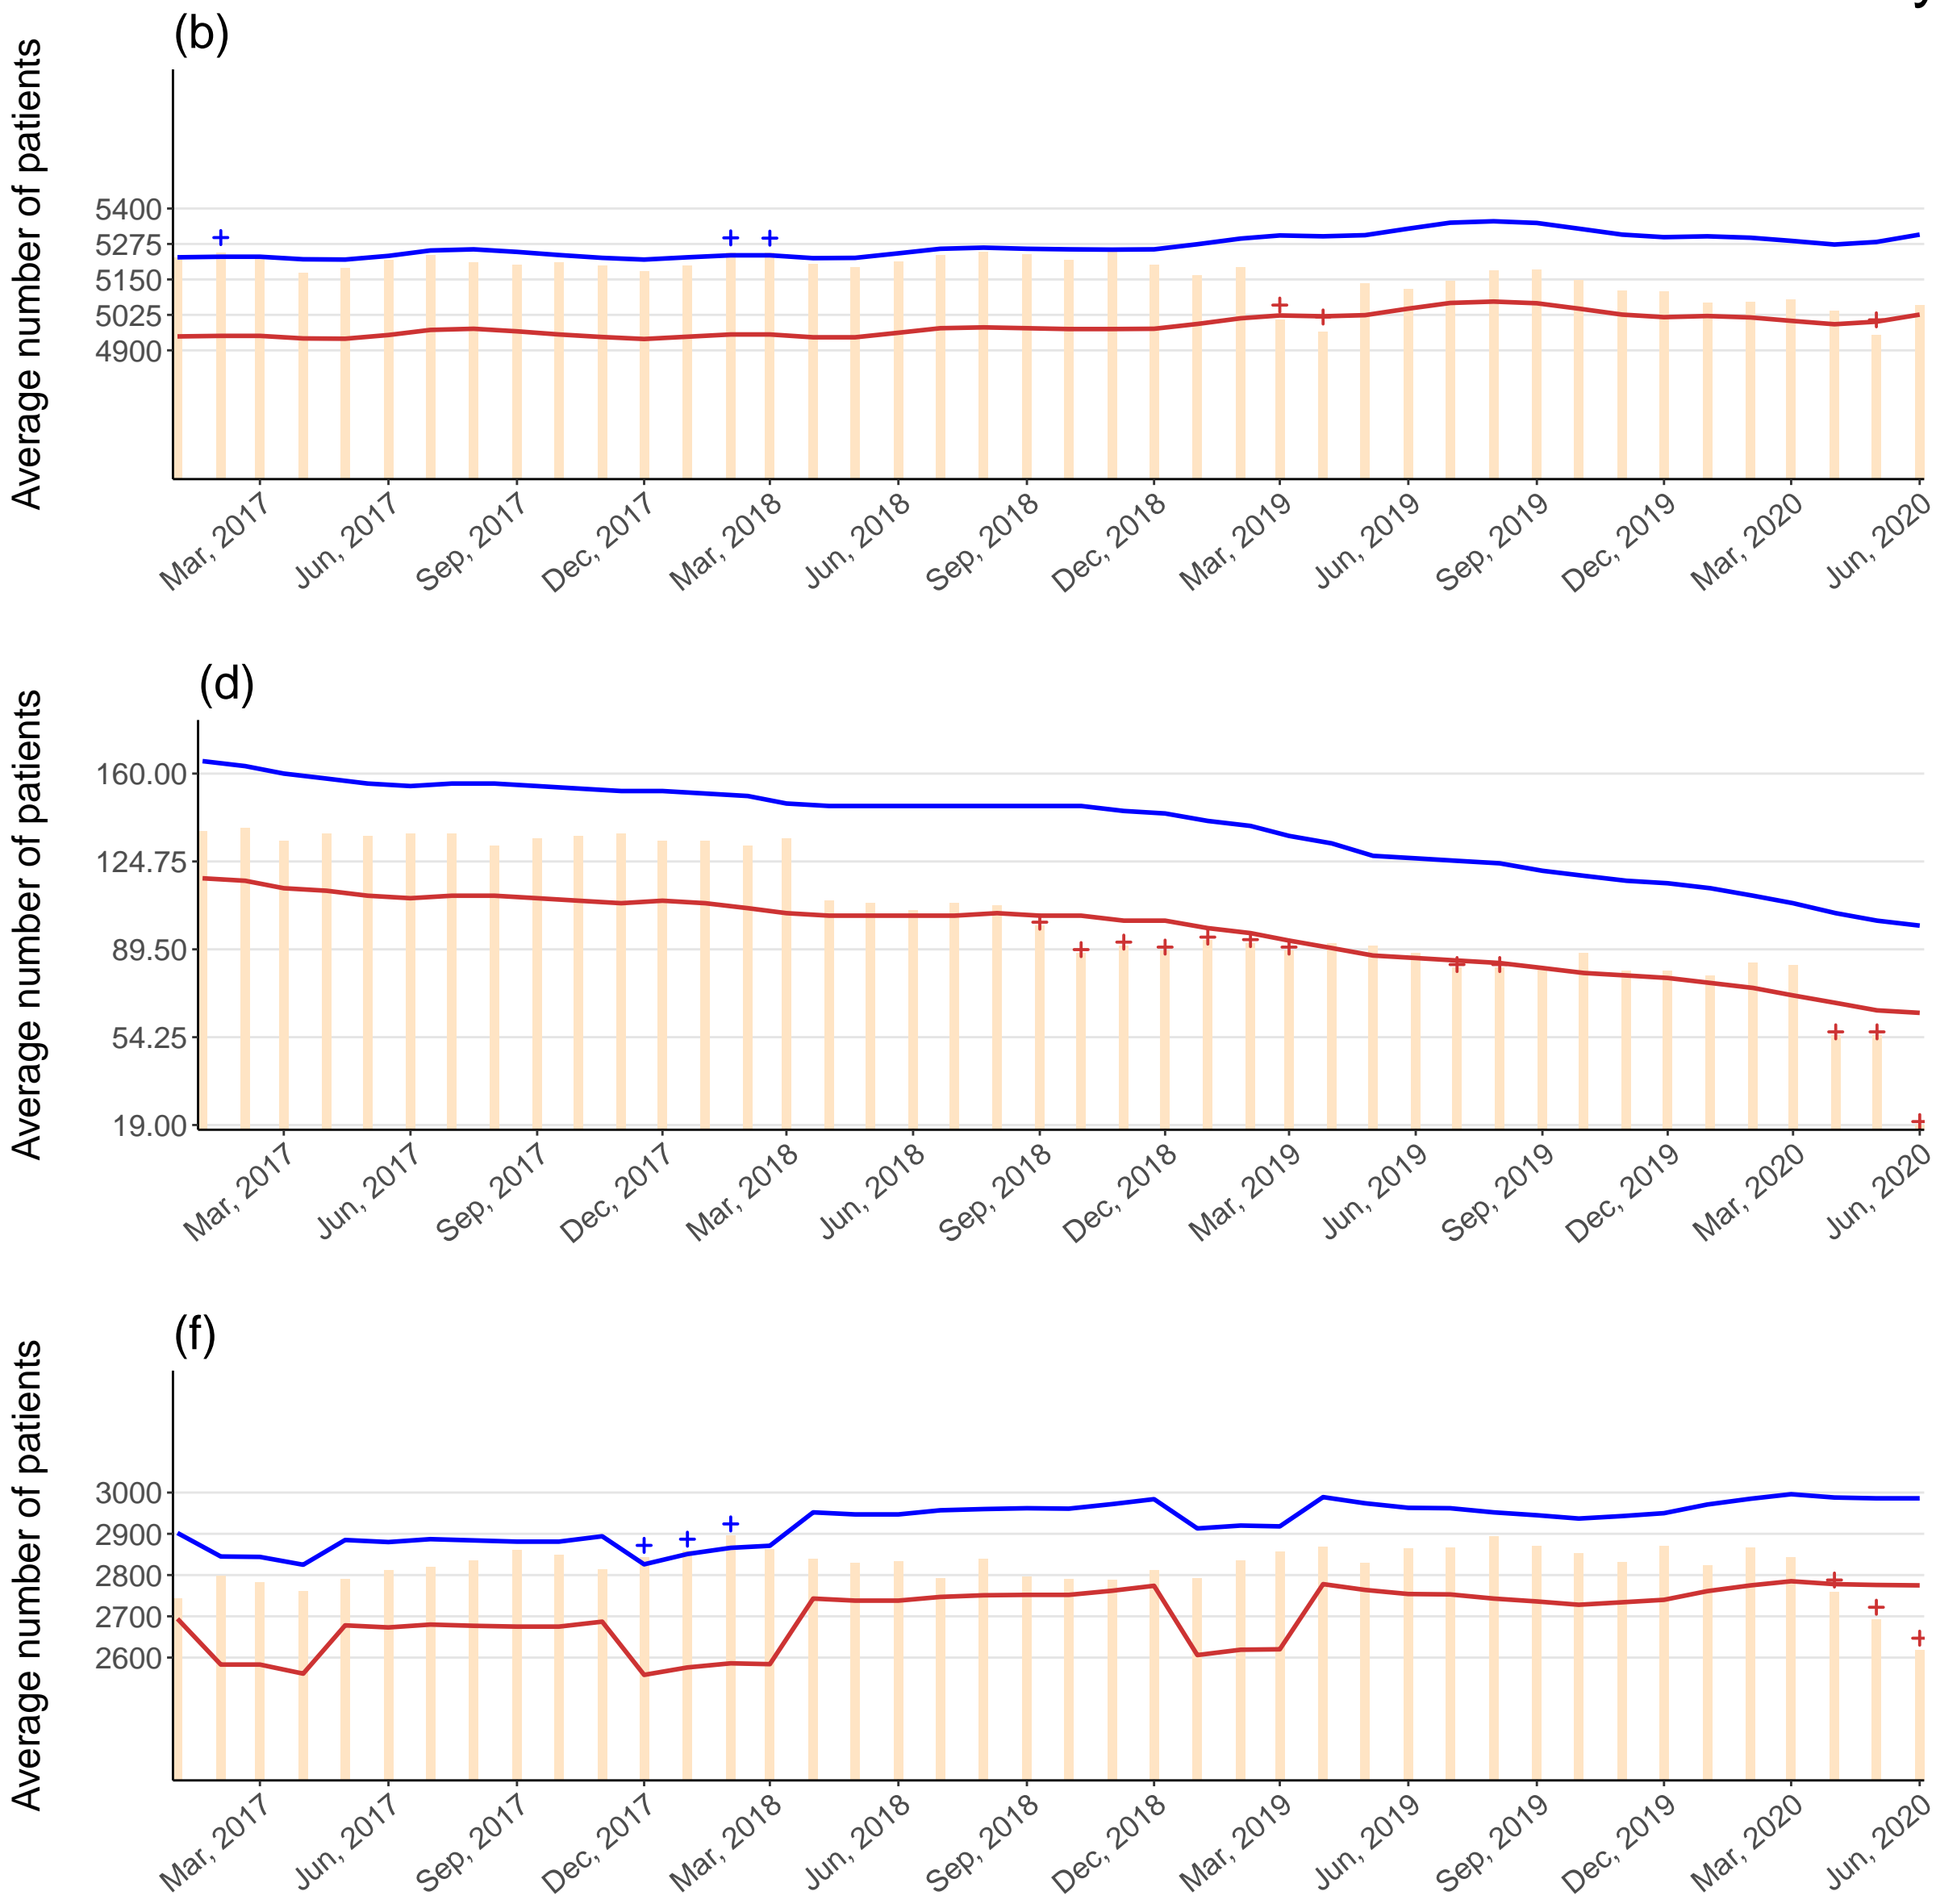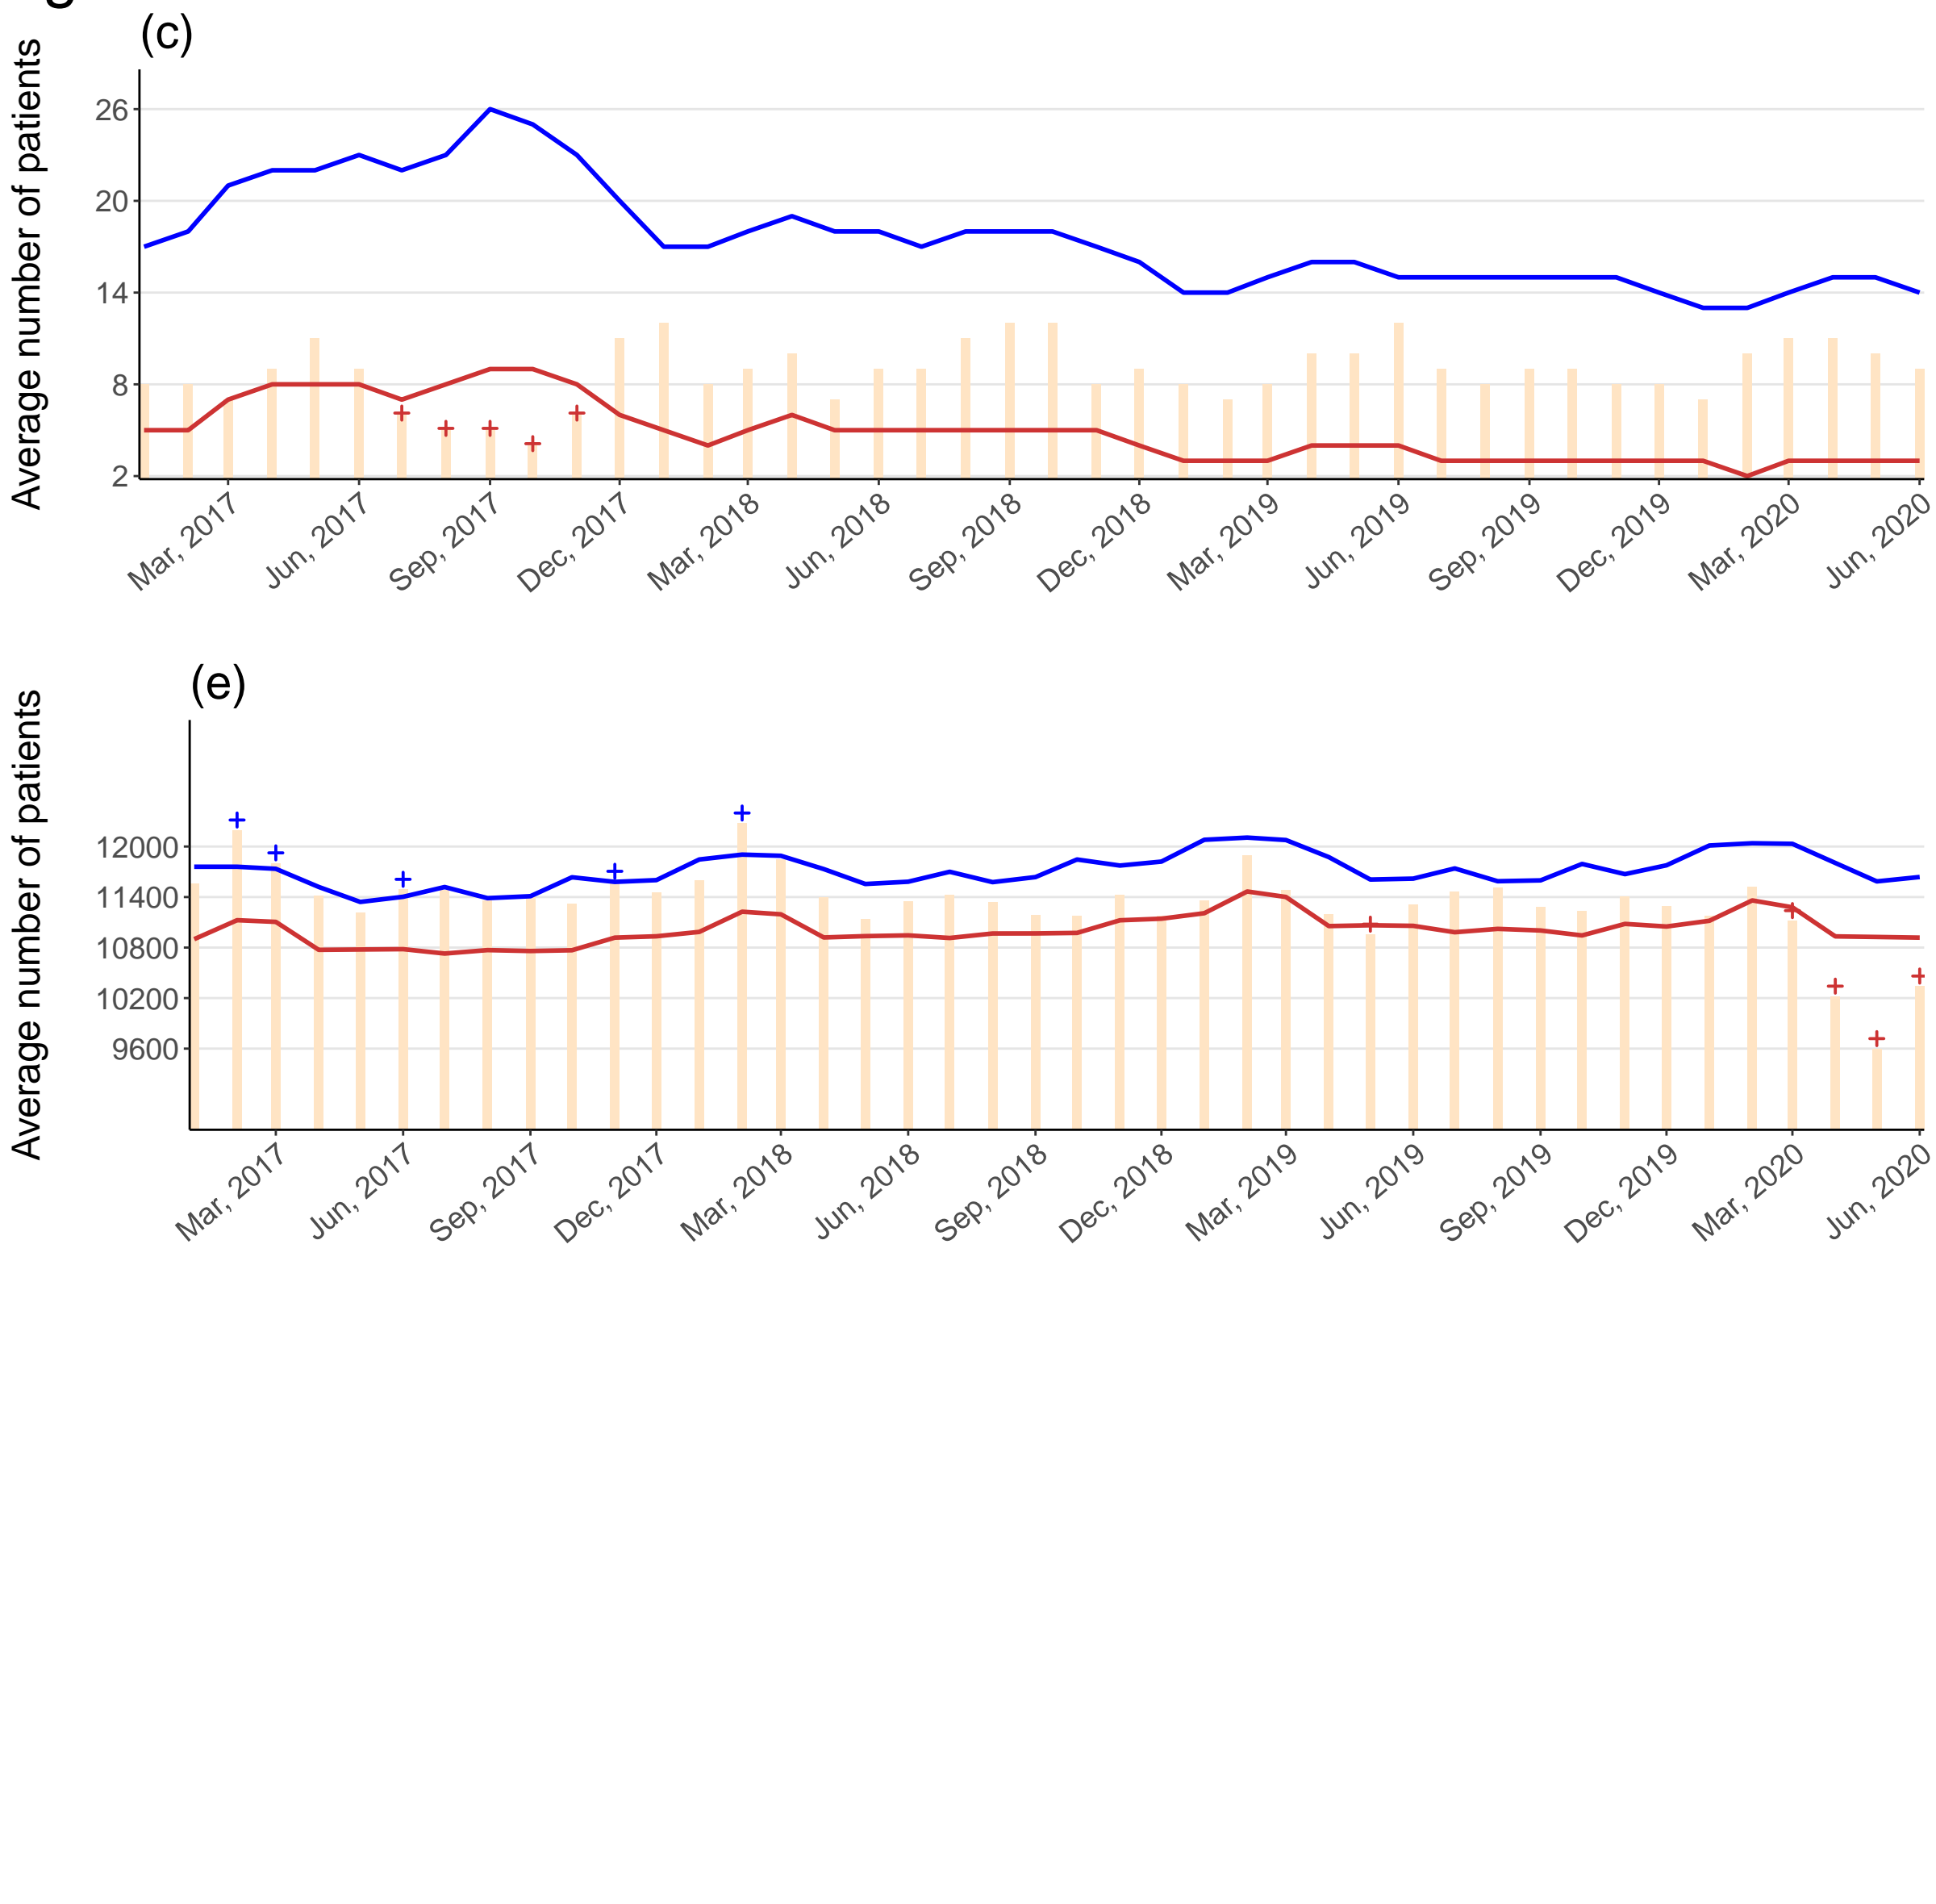

Akita

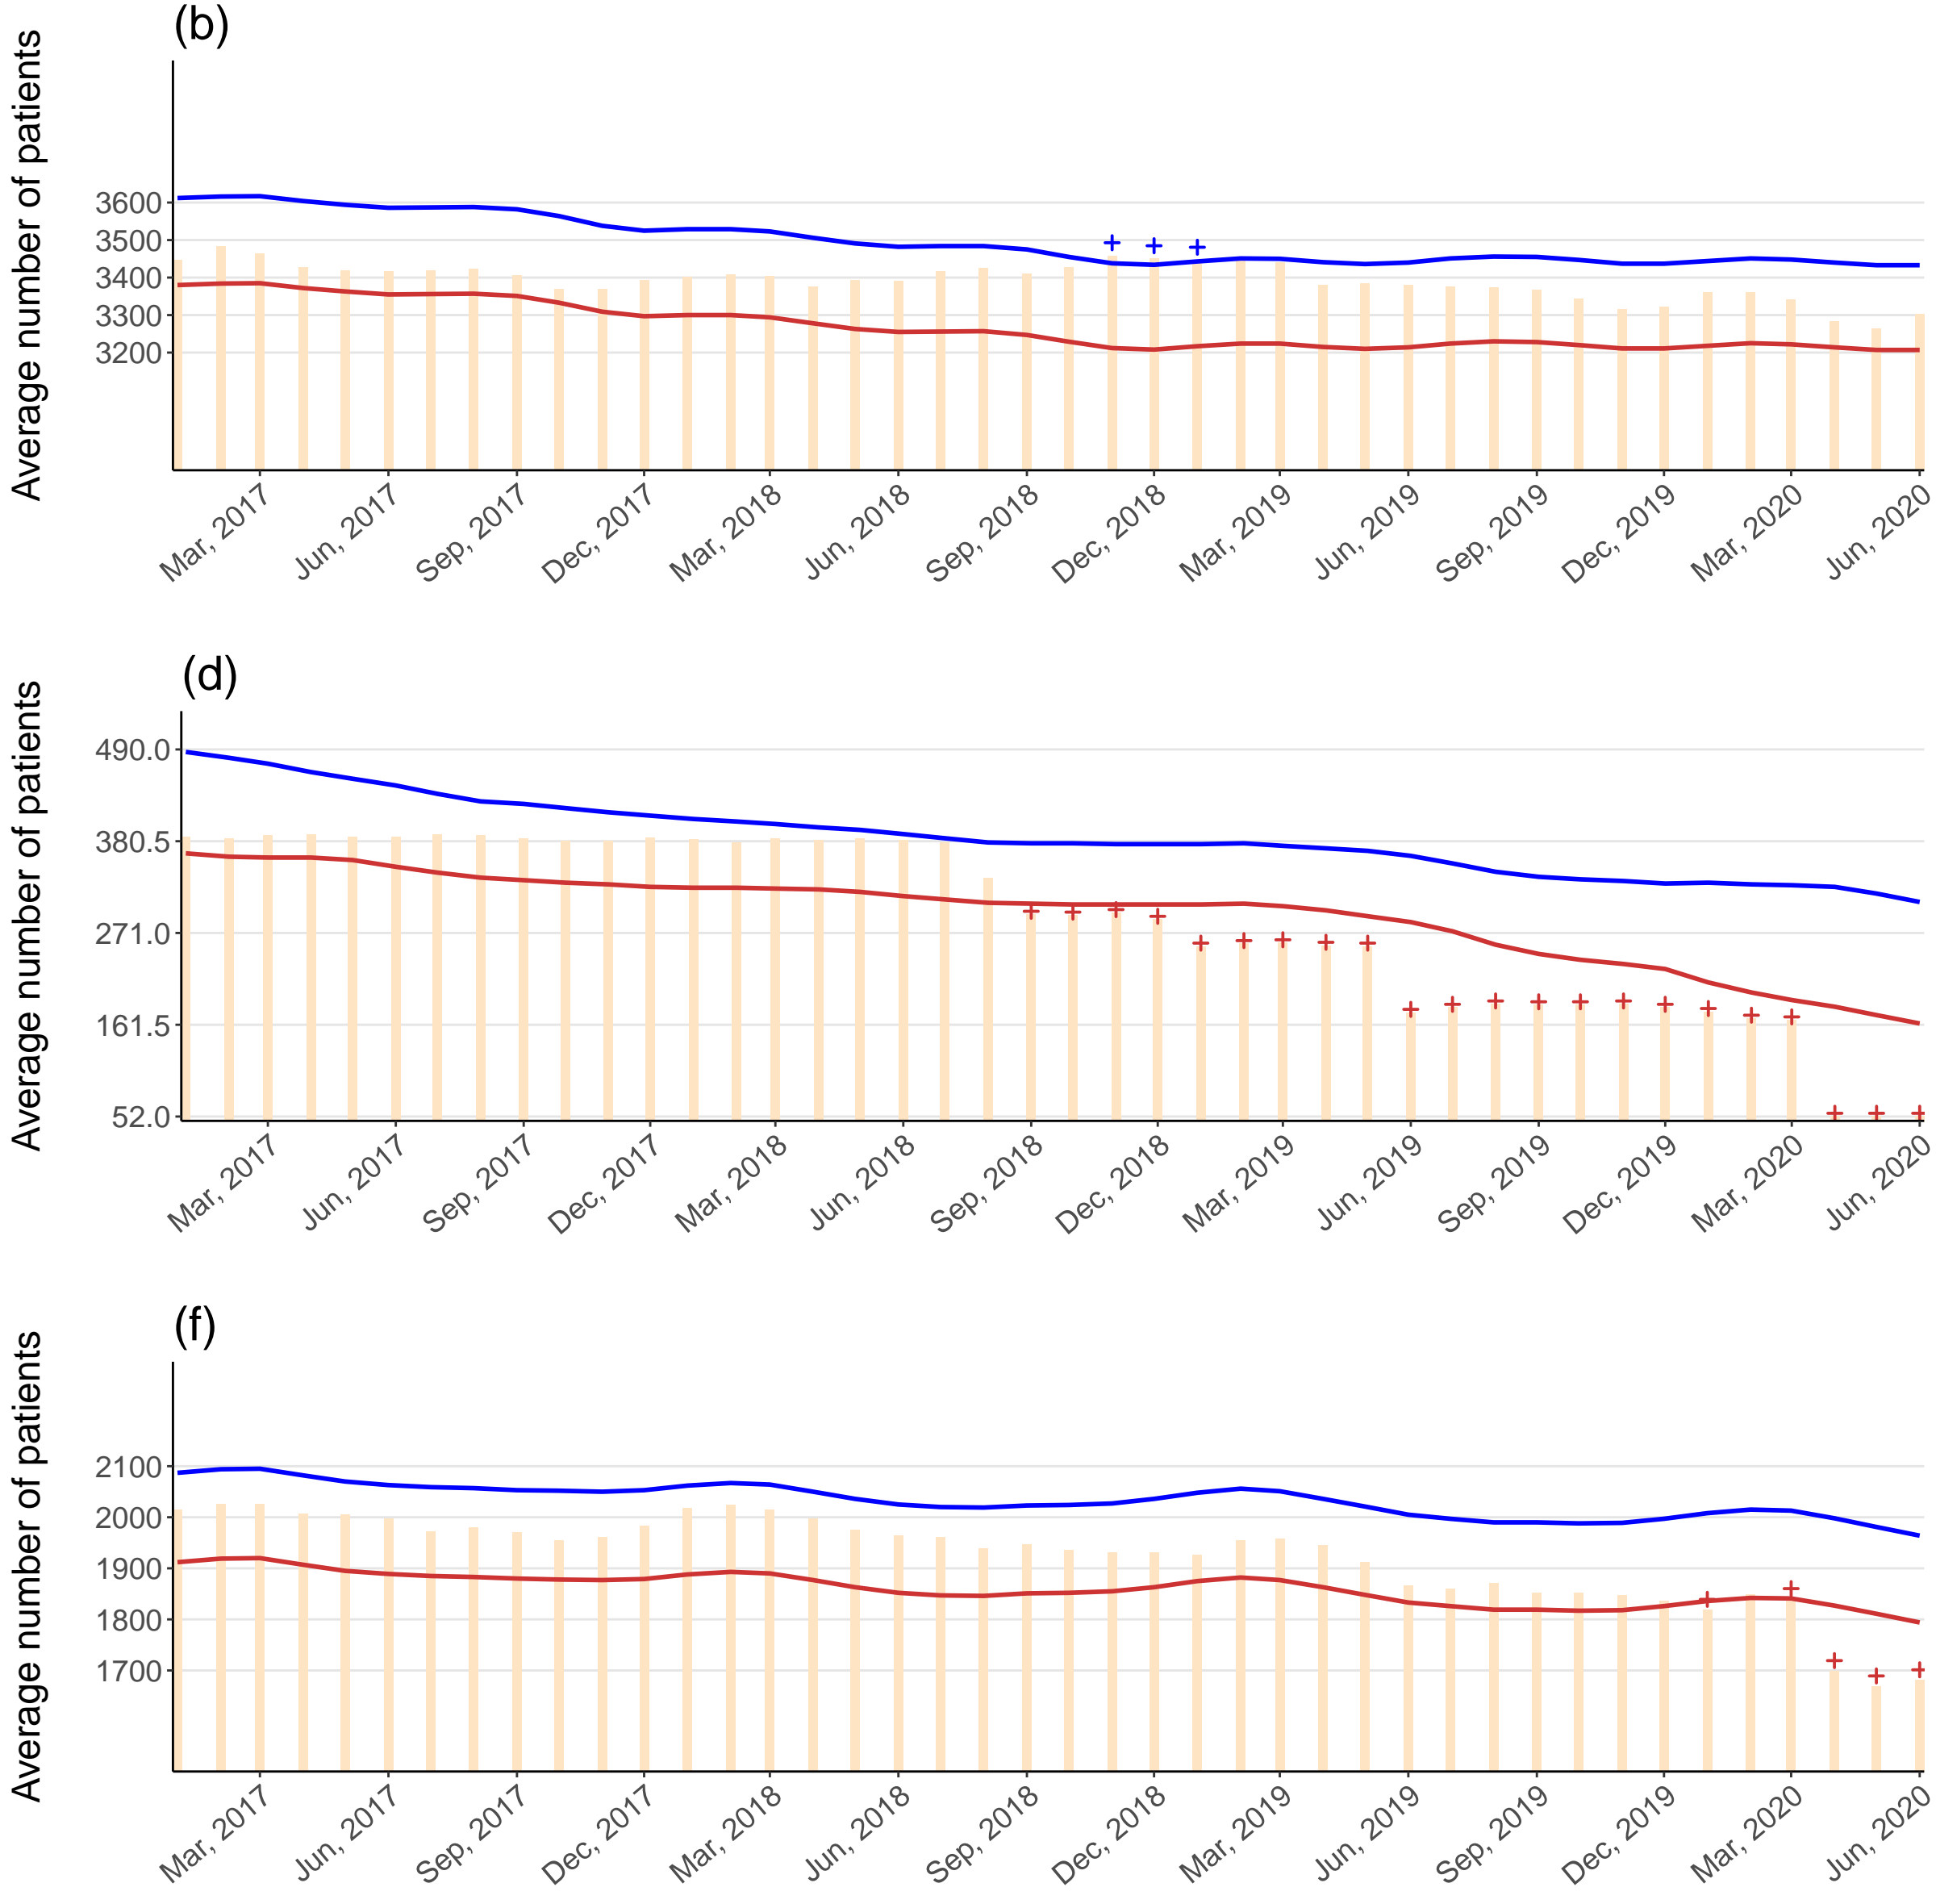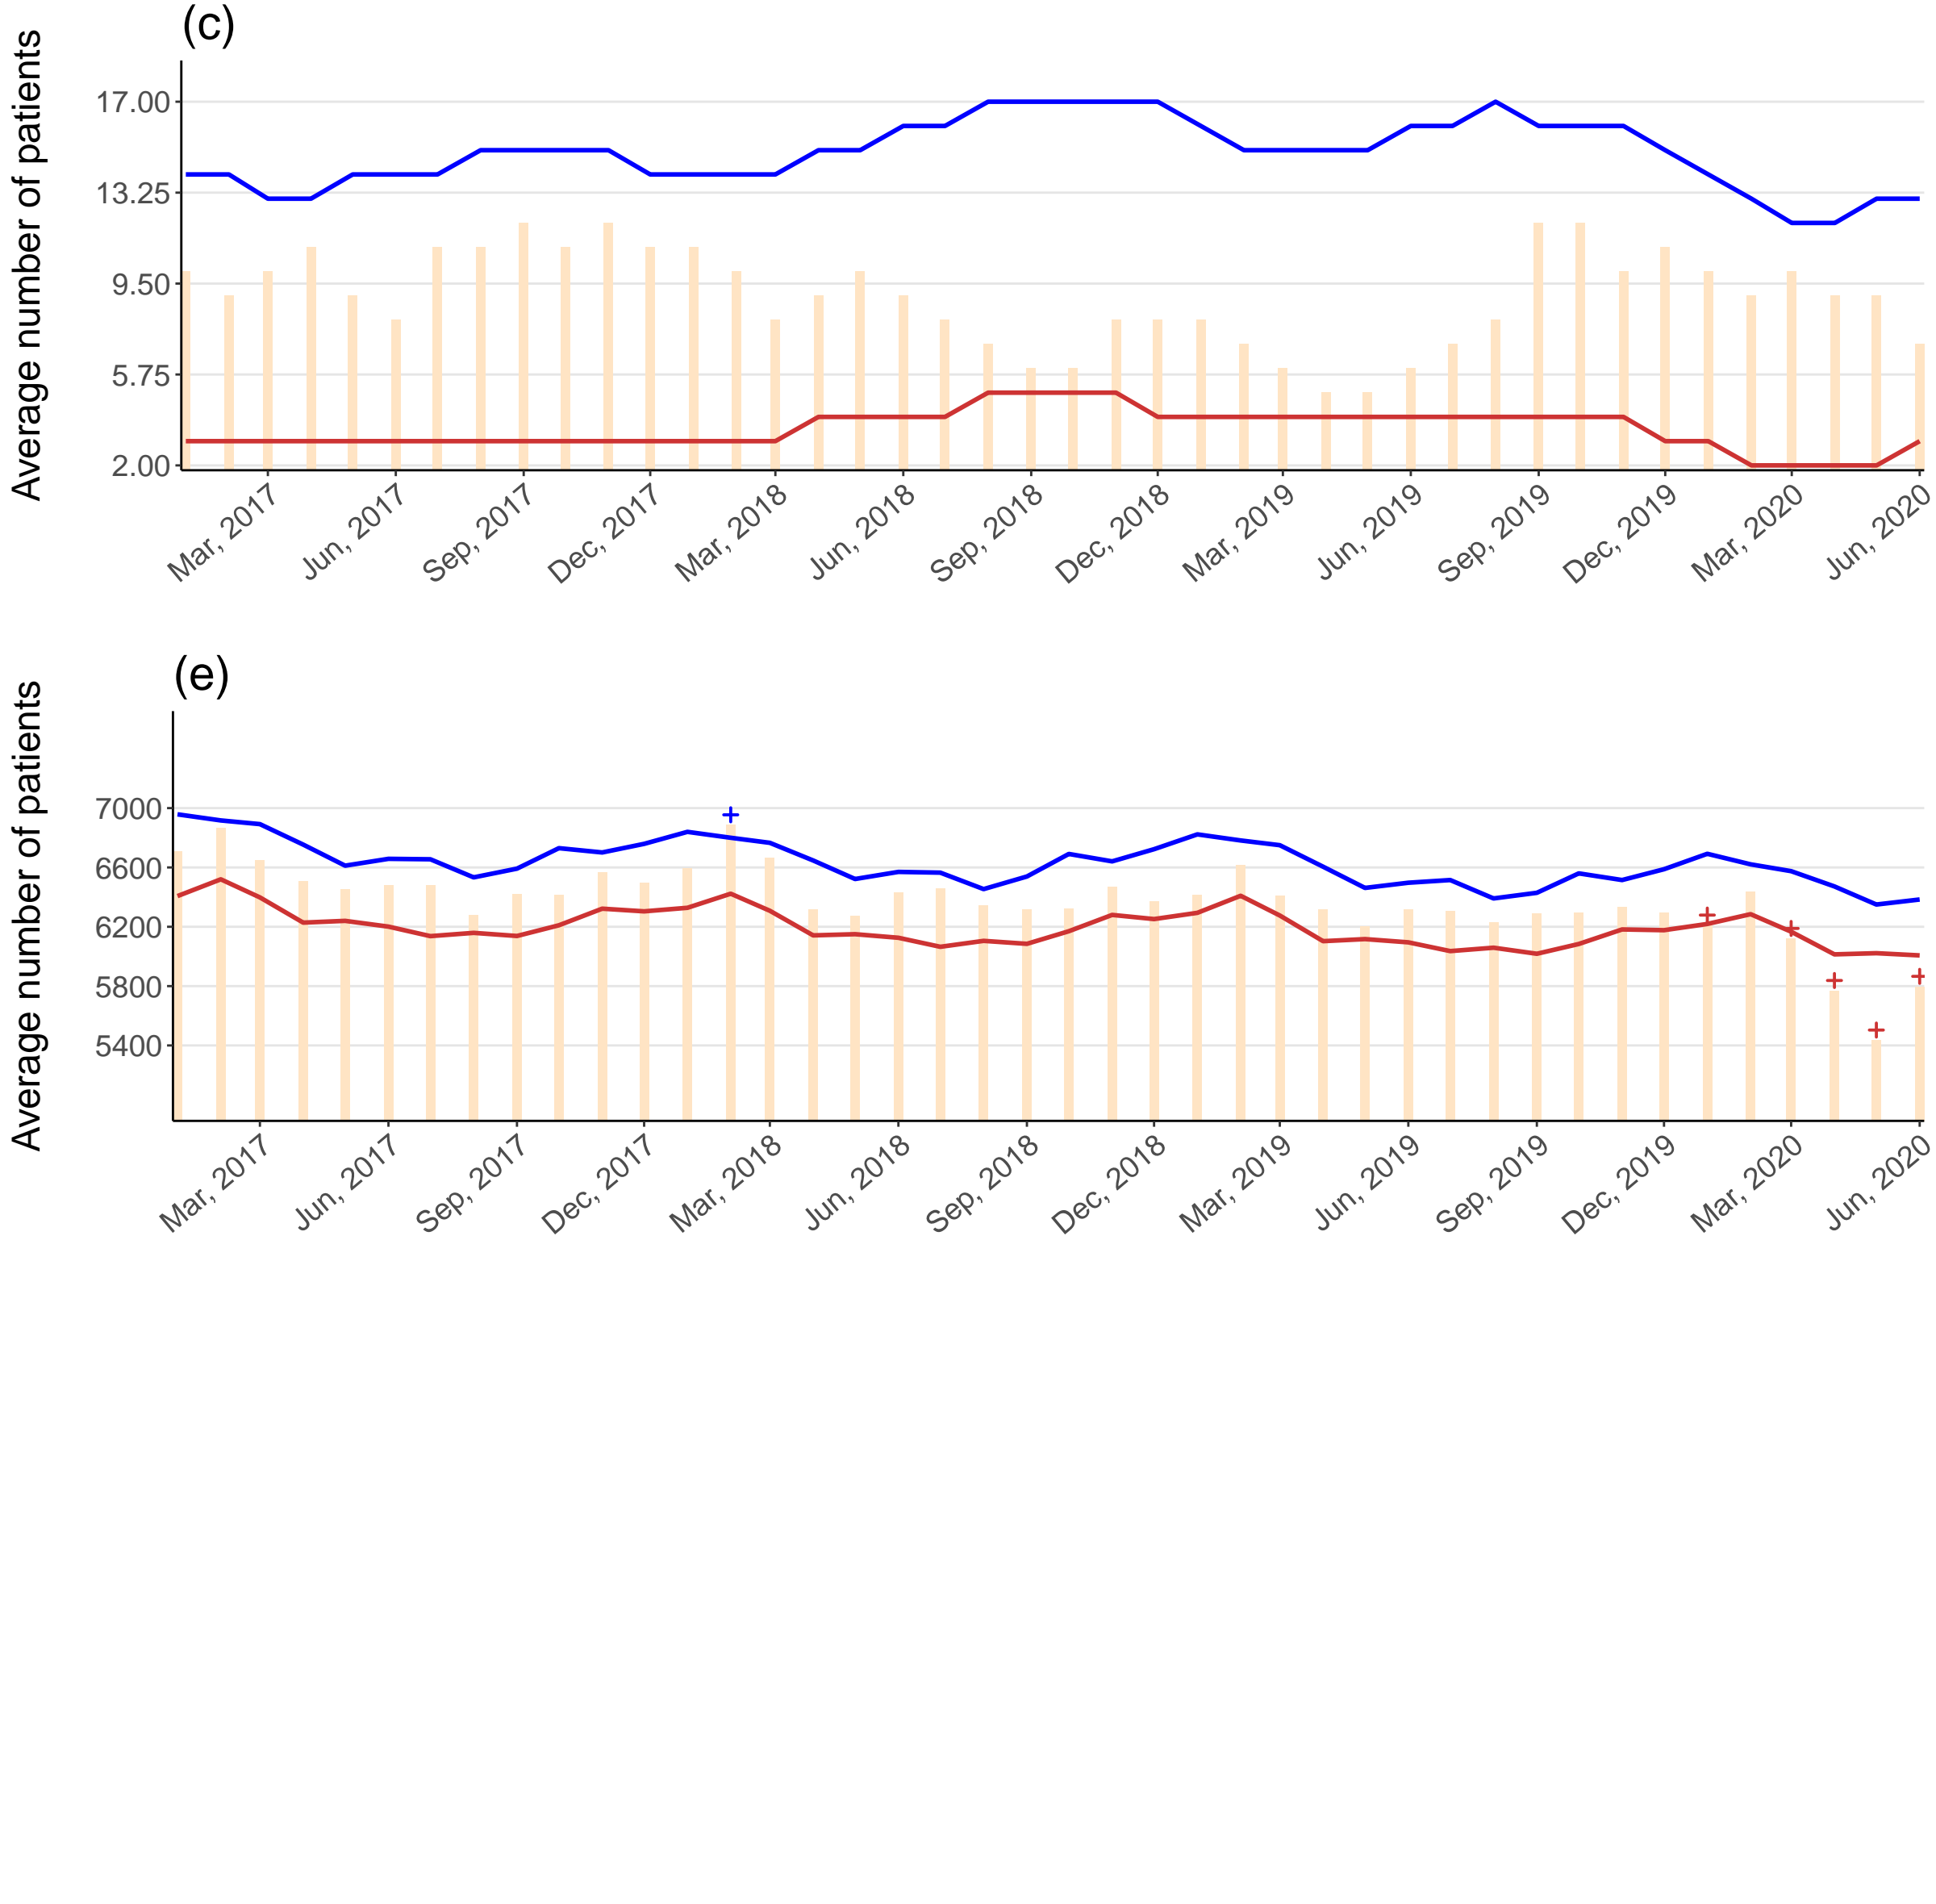

Yamagata

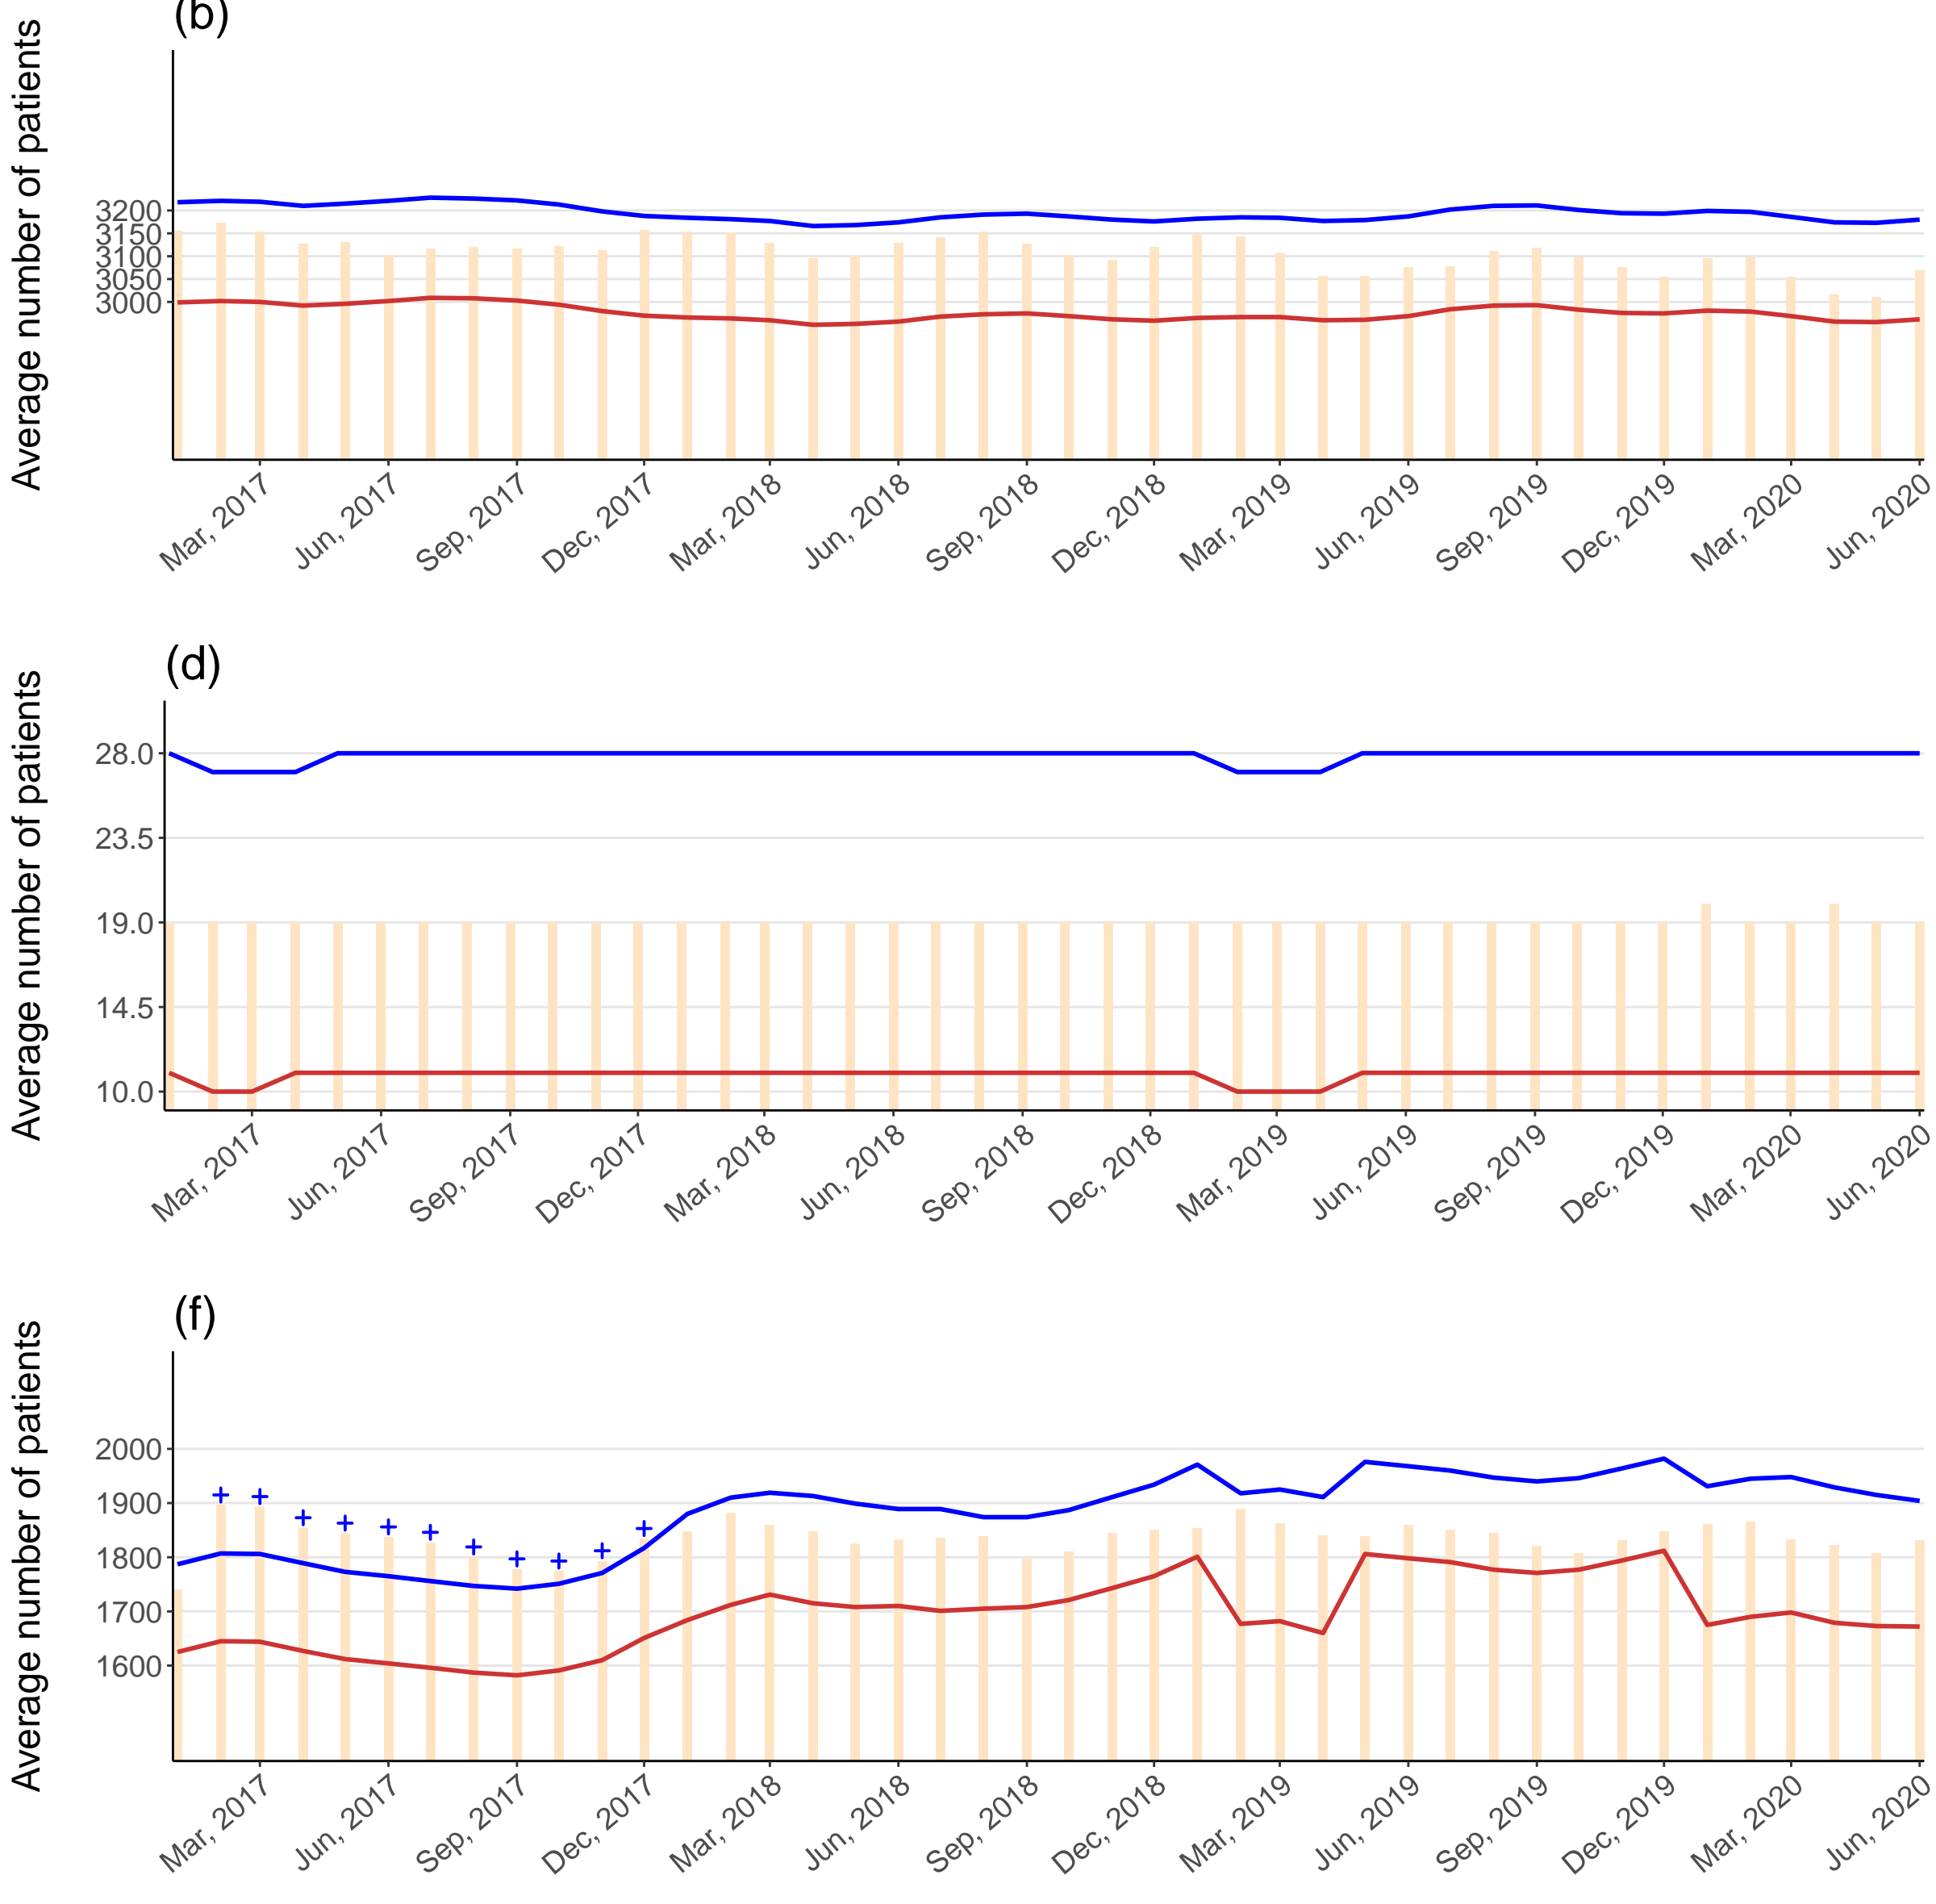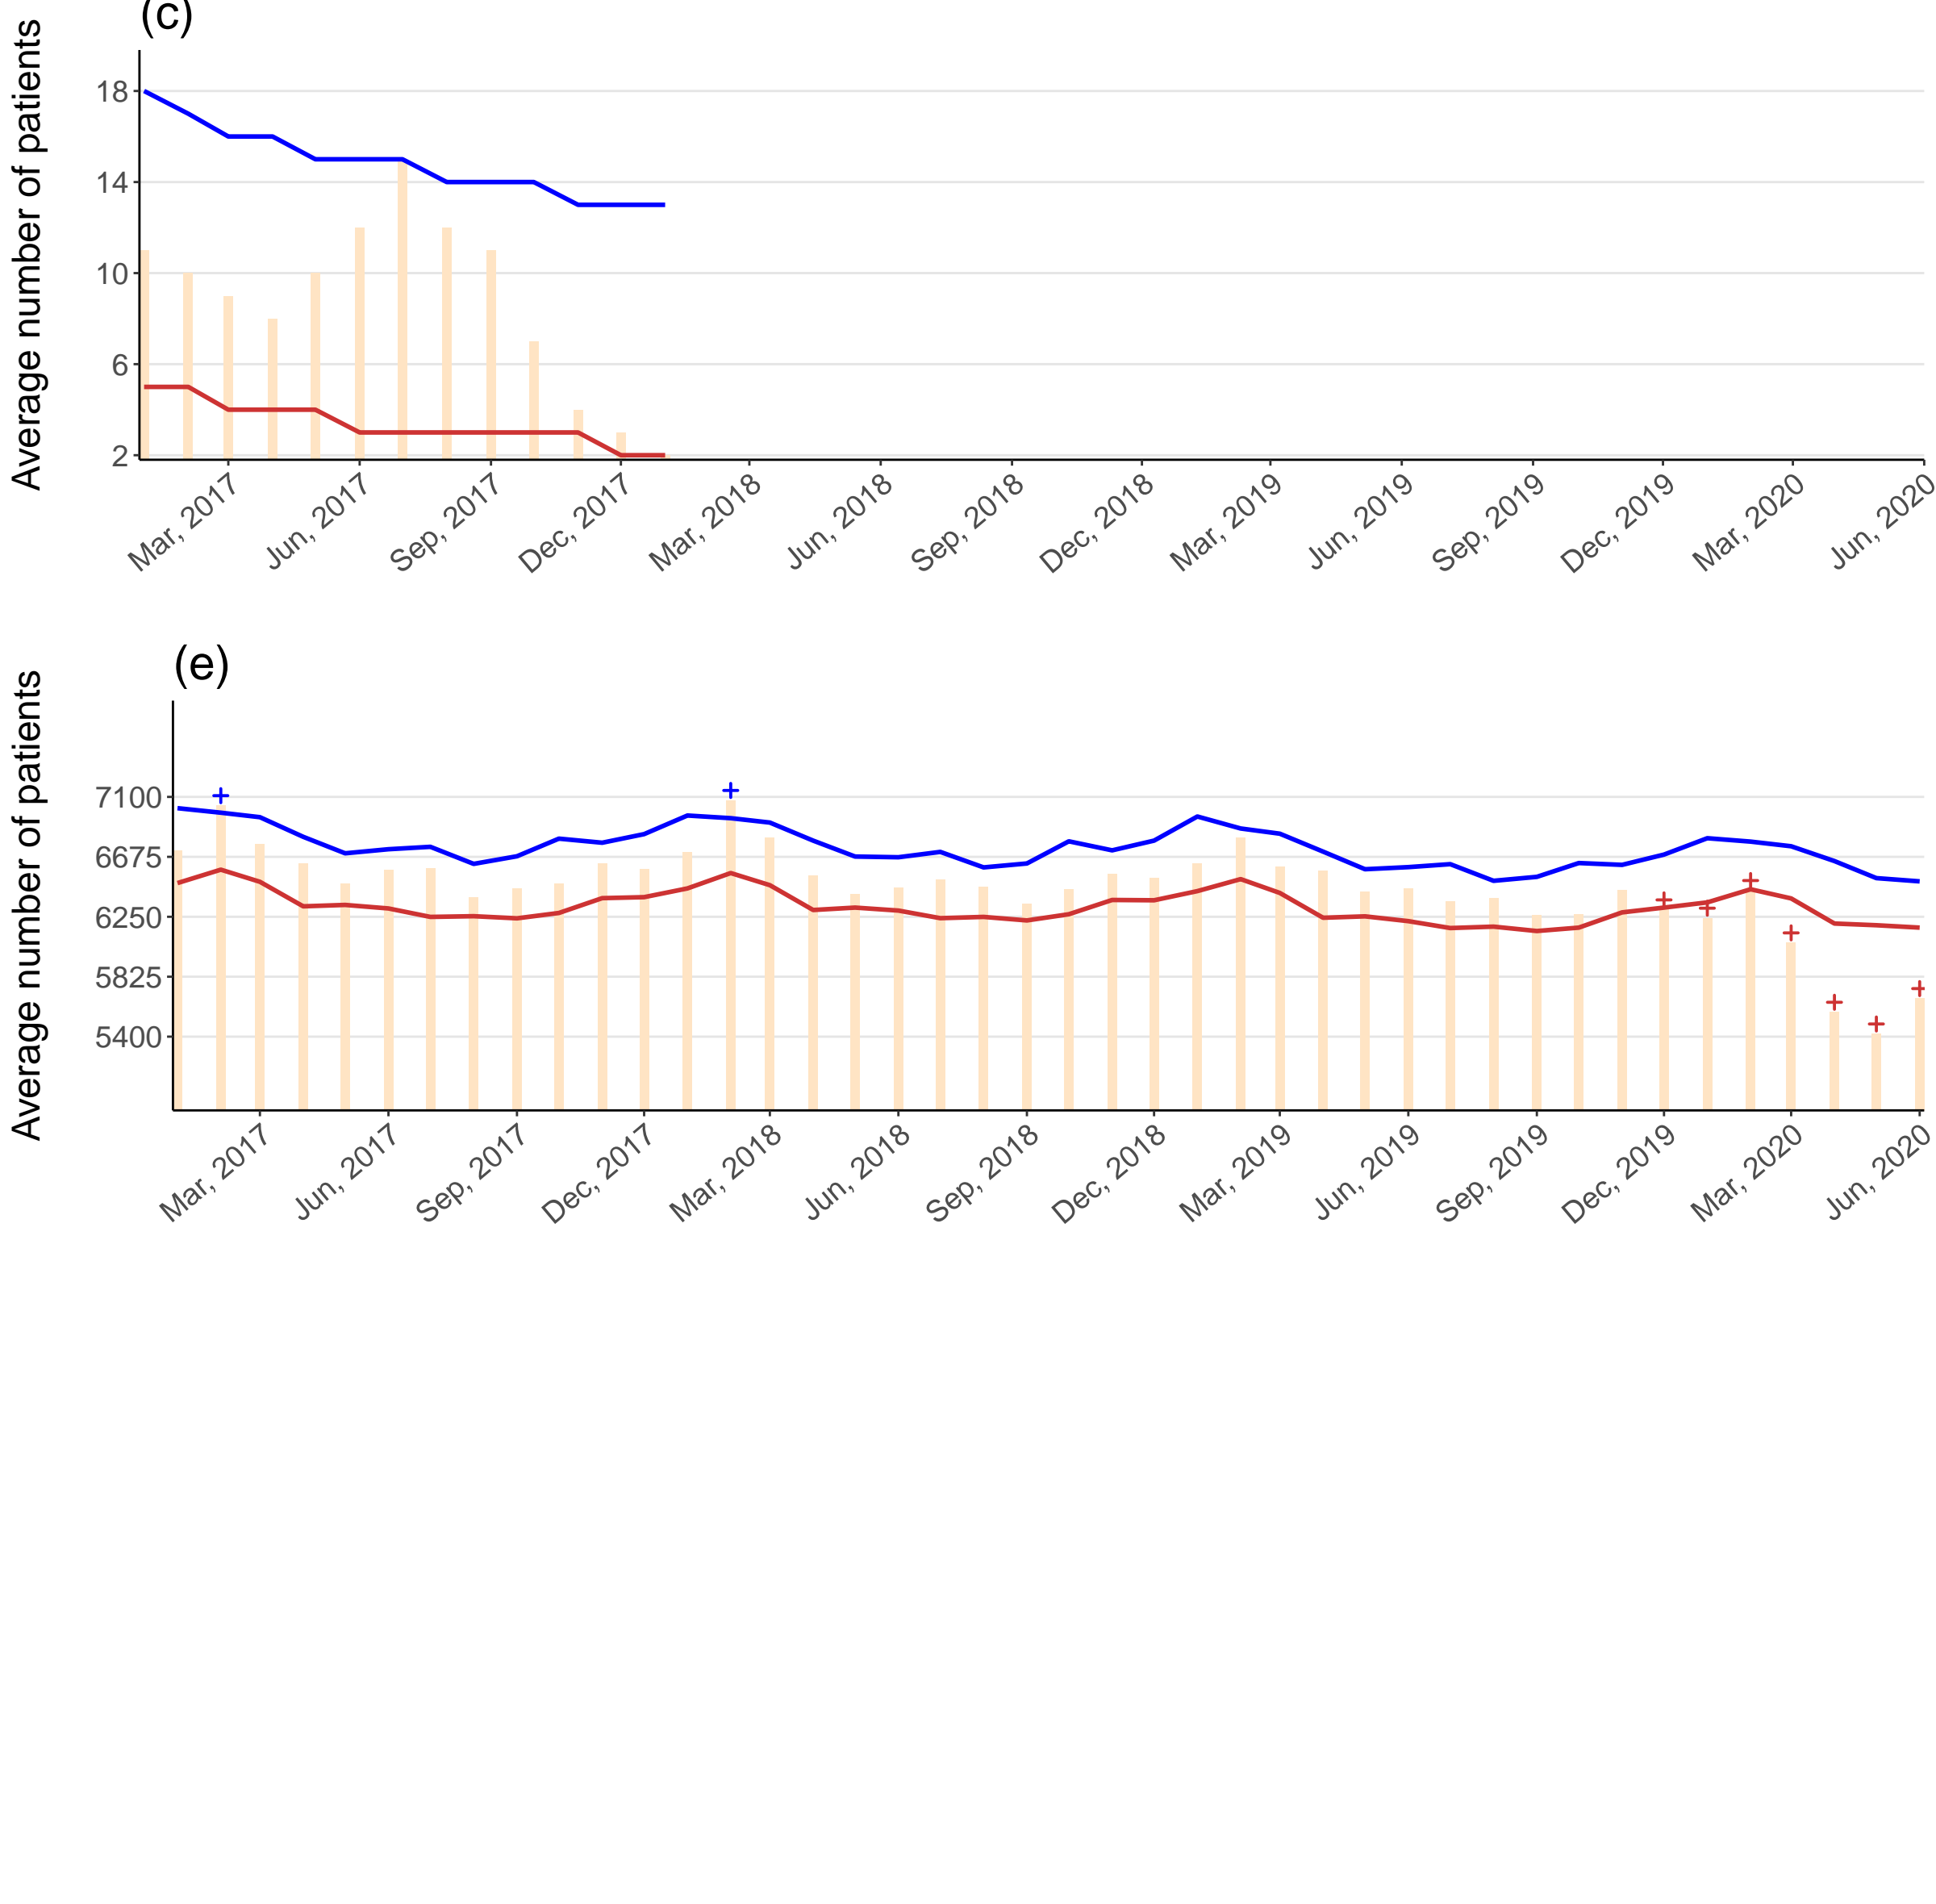



# Fukushima

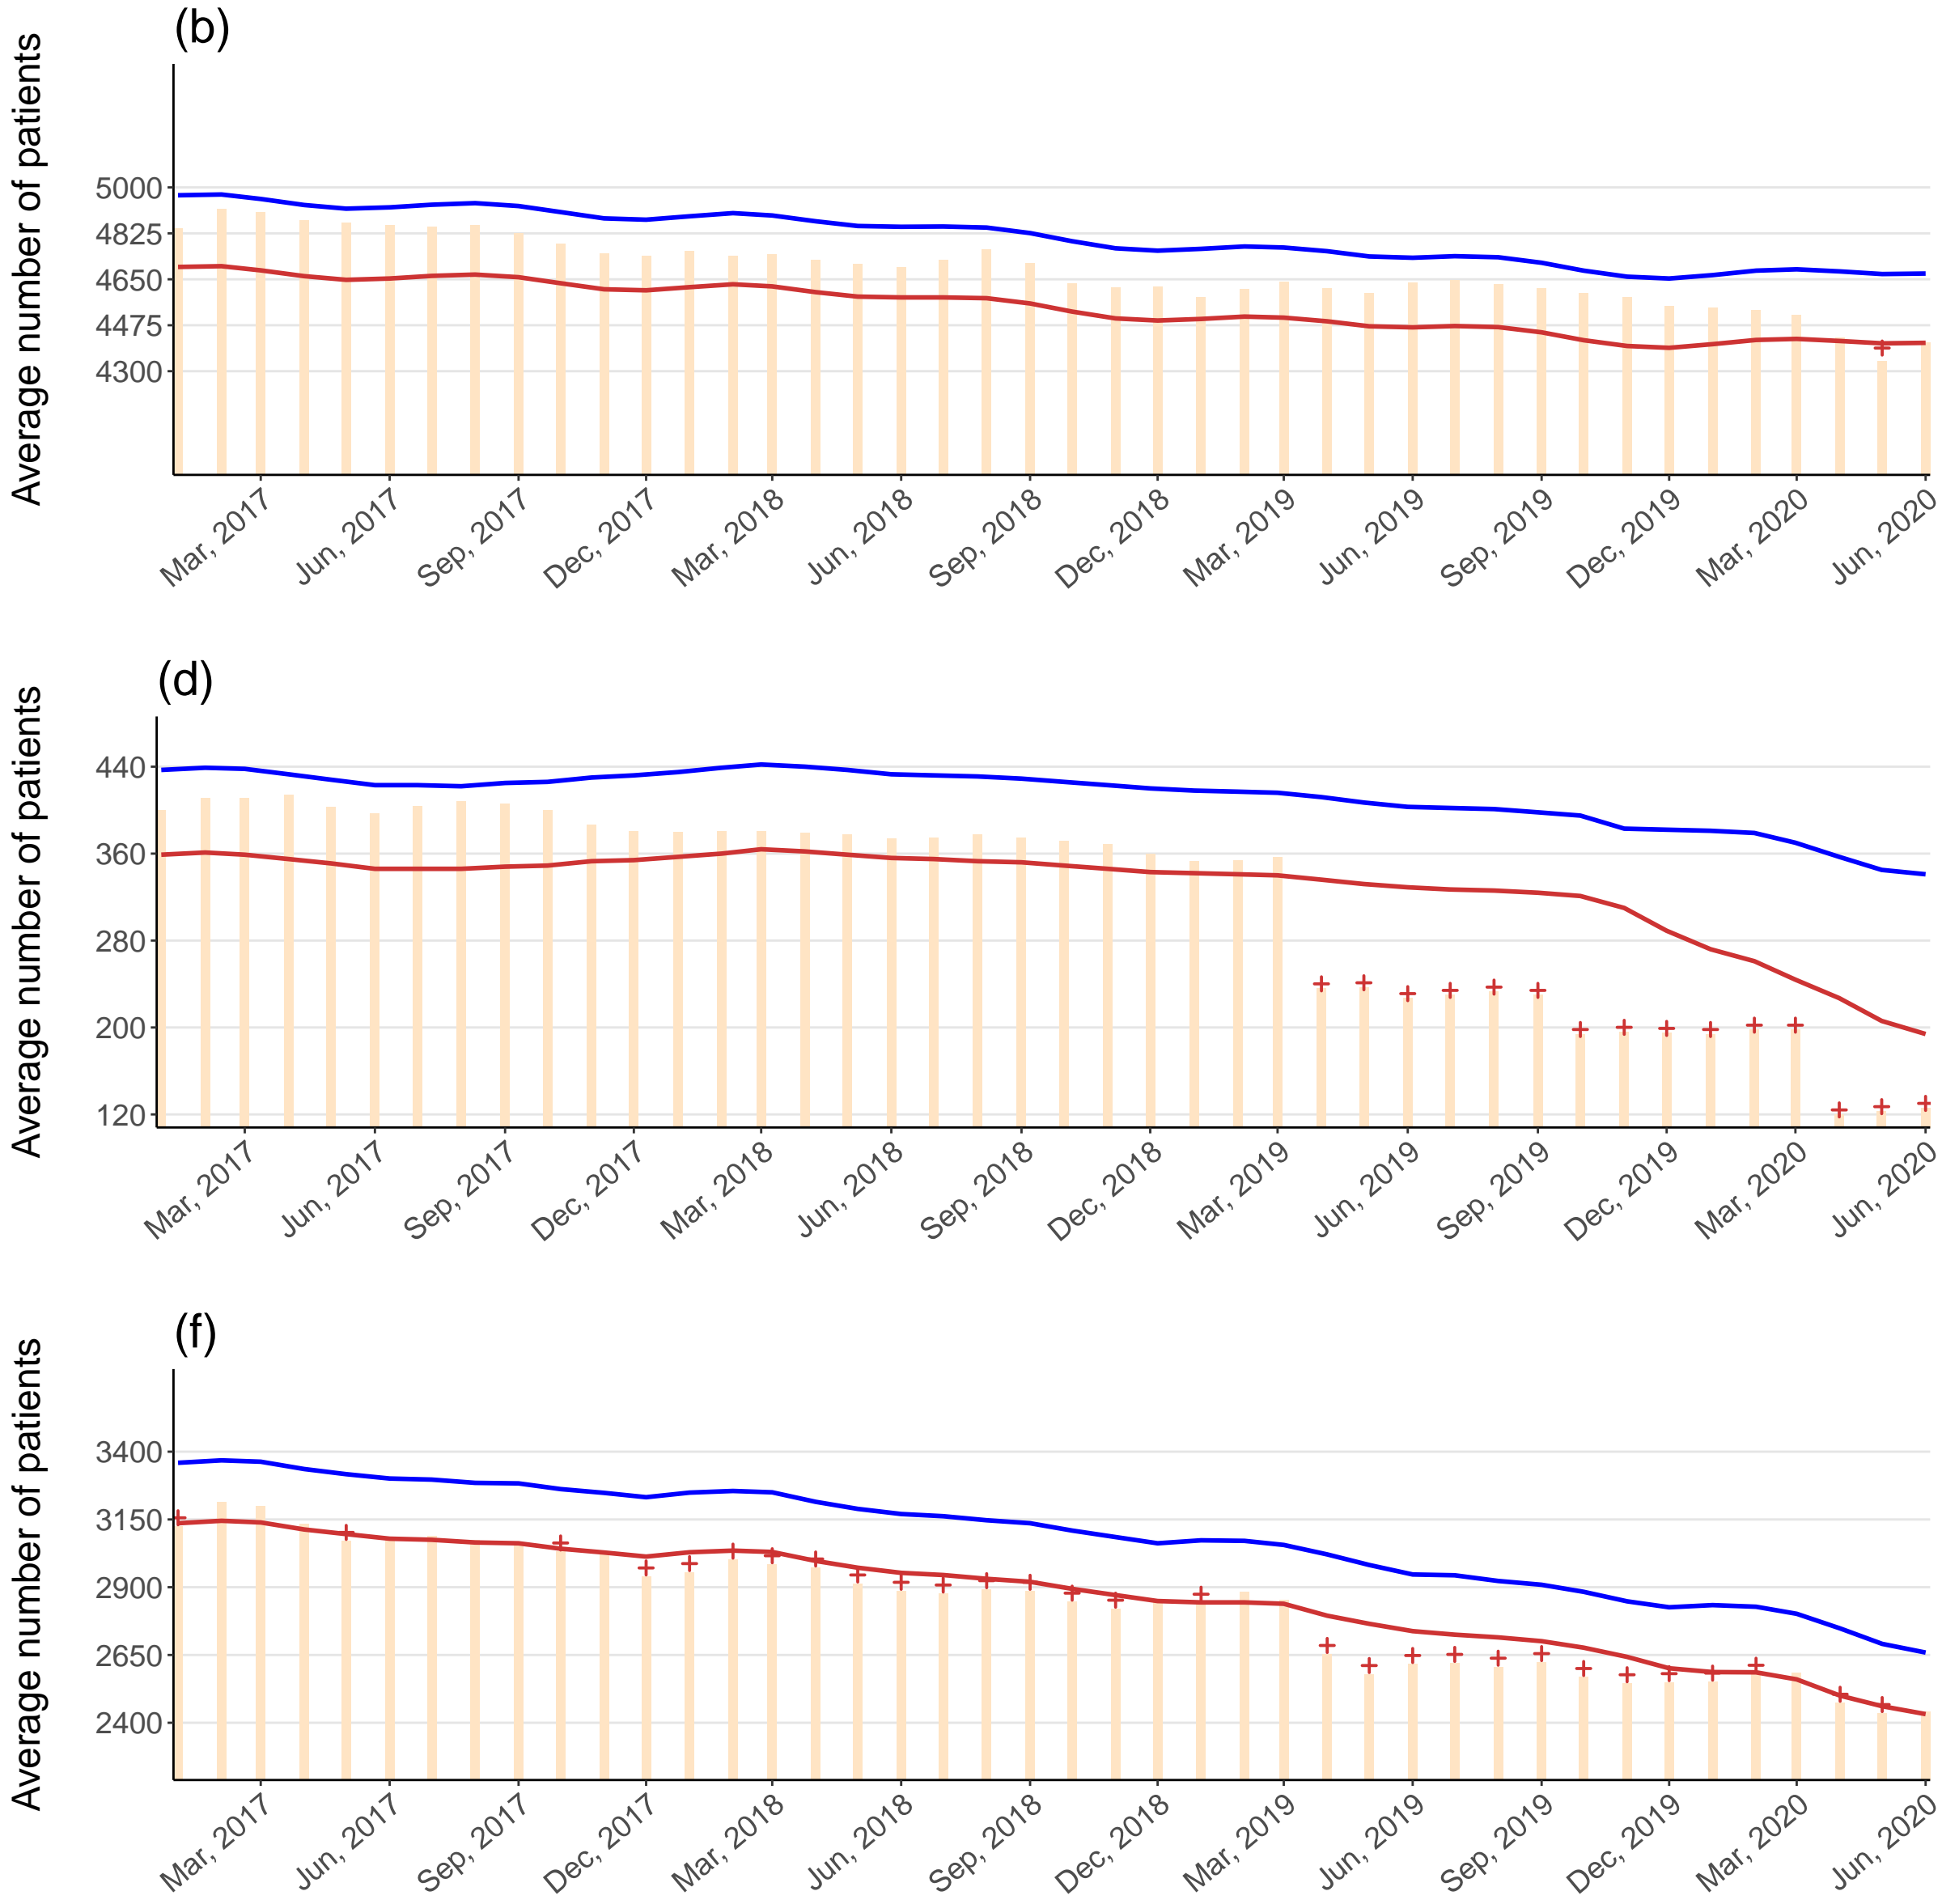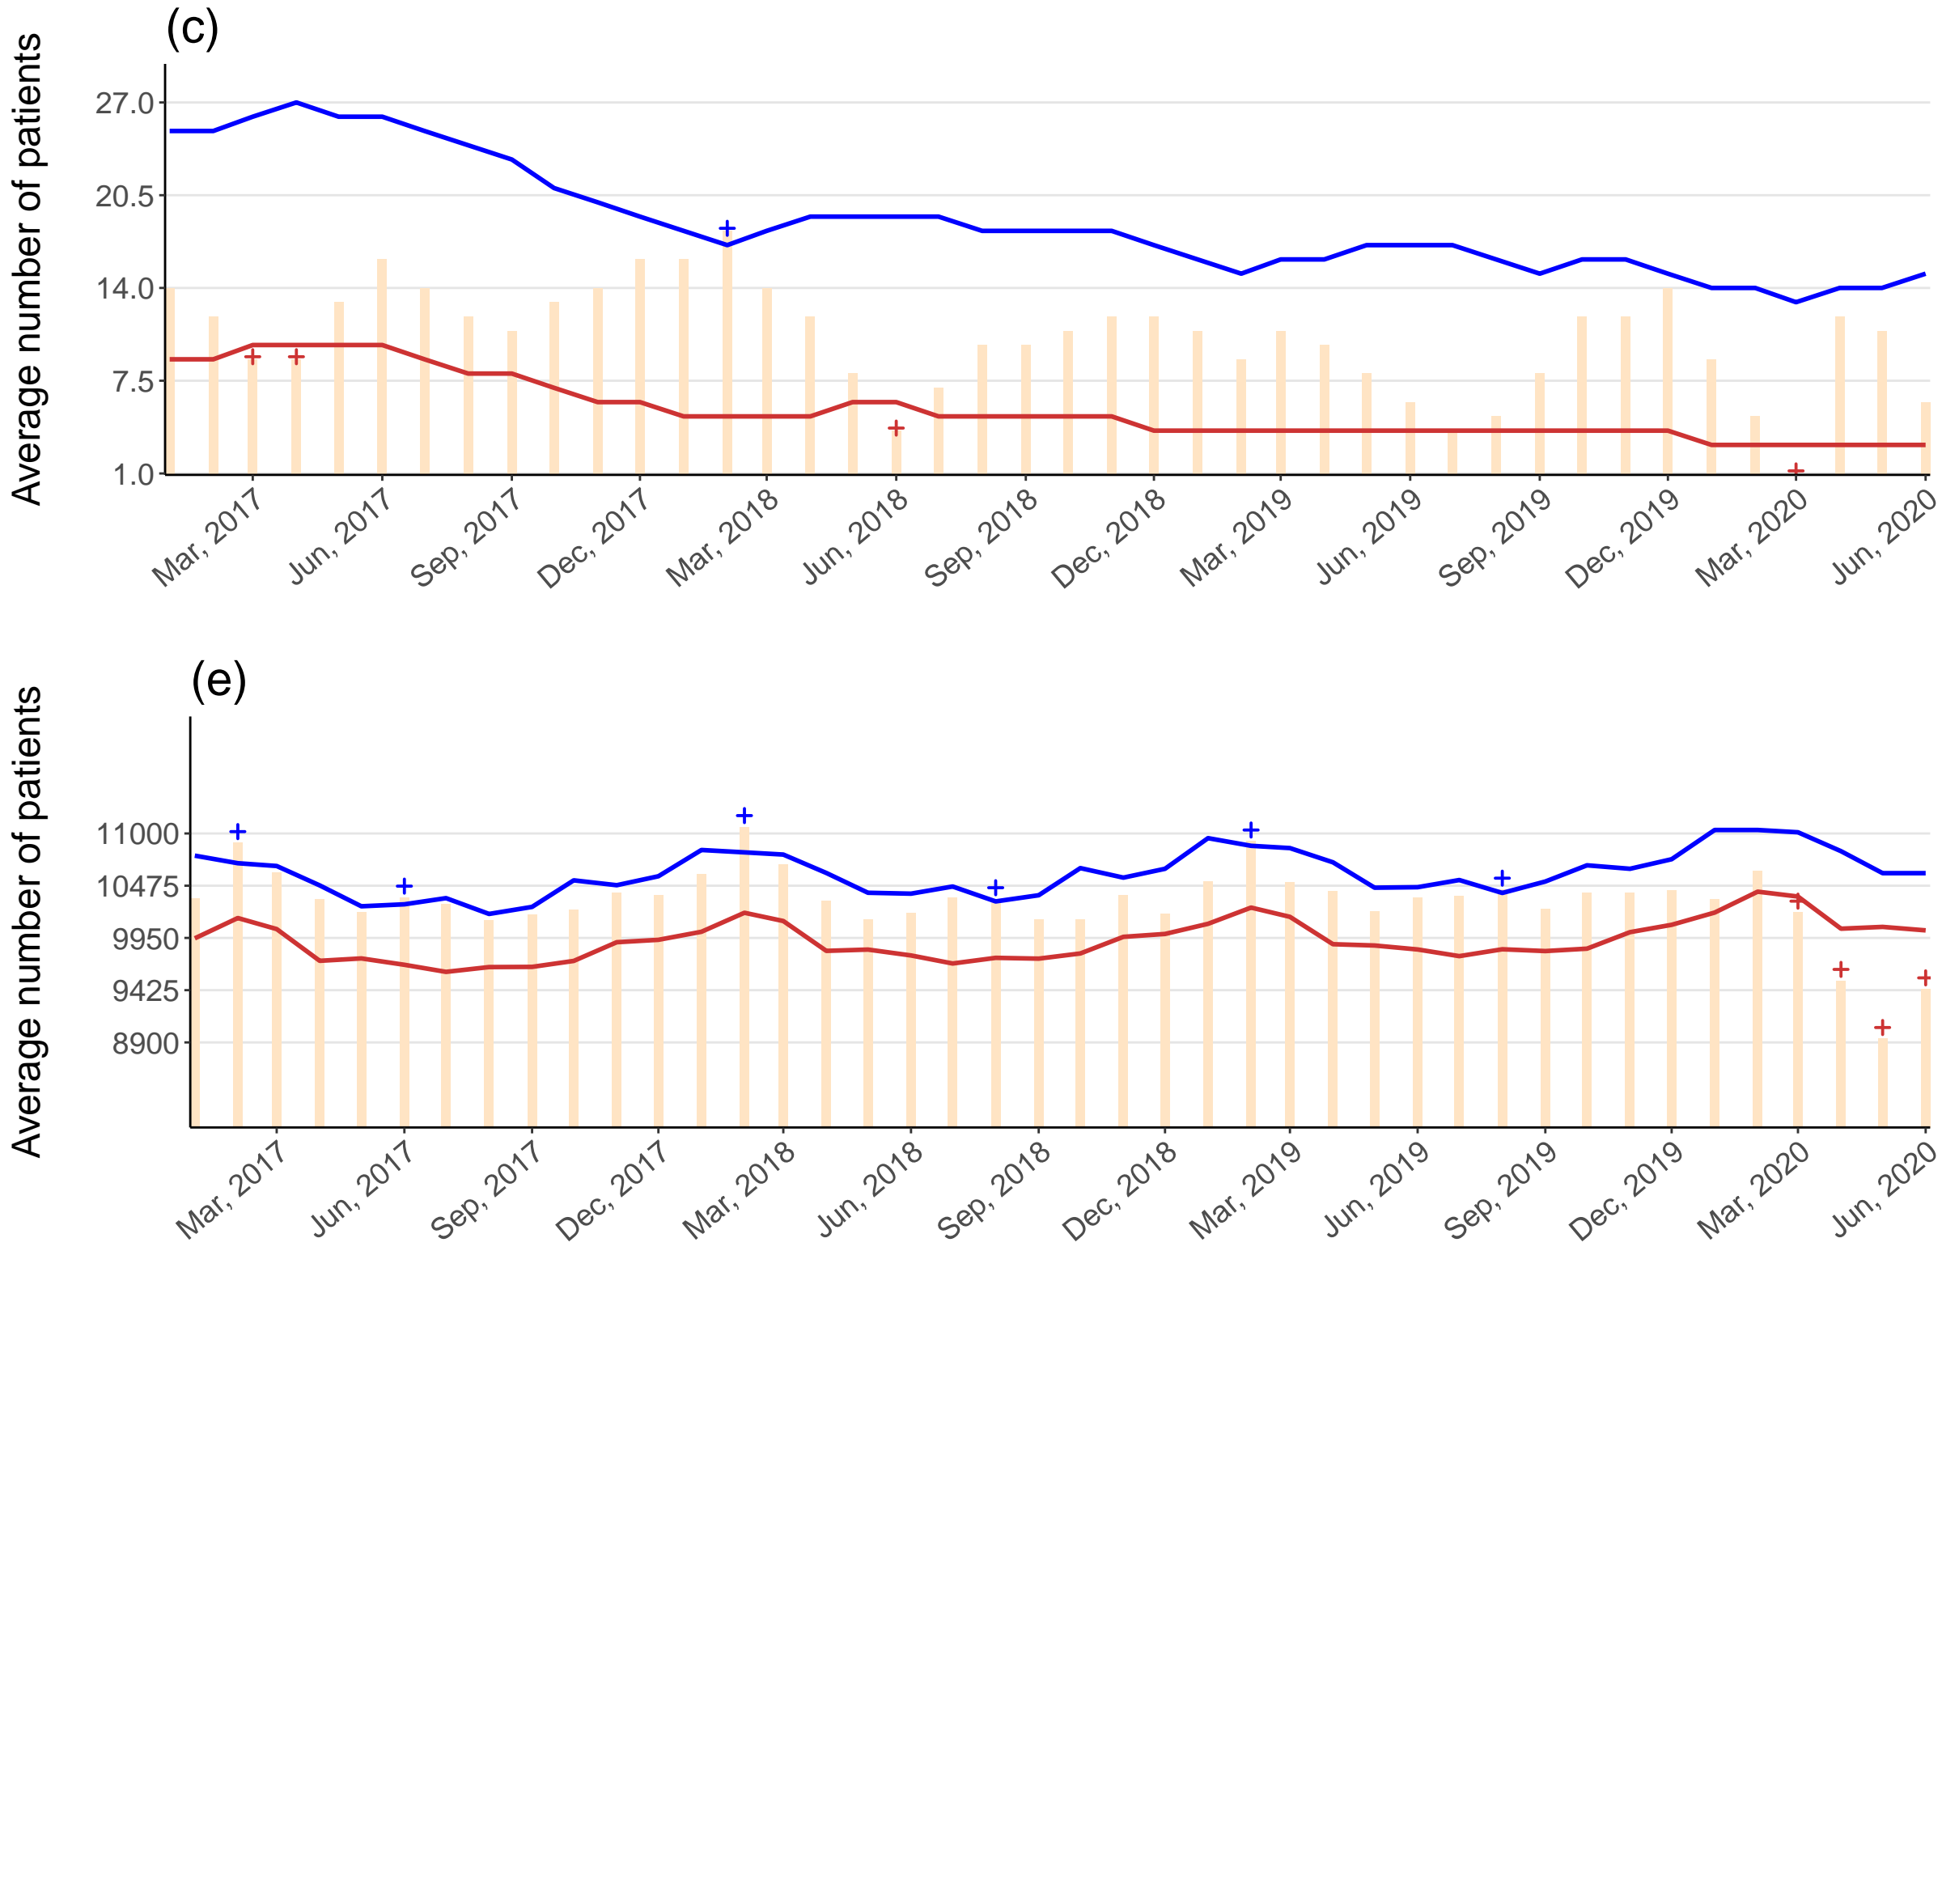

# Ibaraki

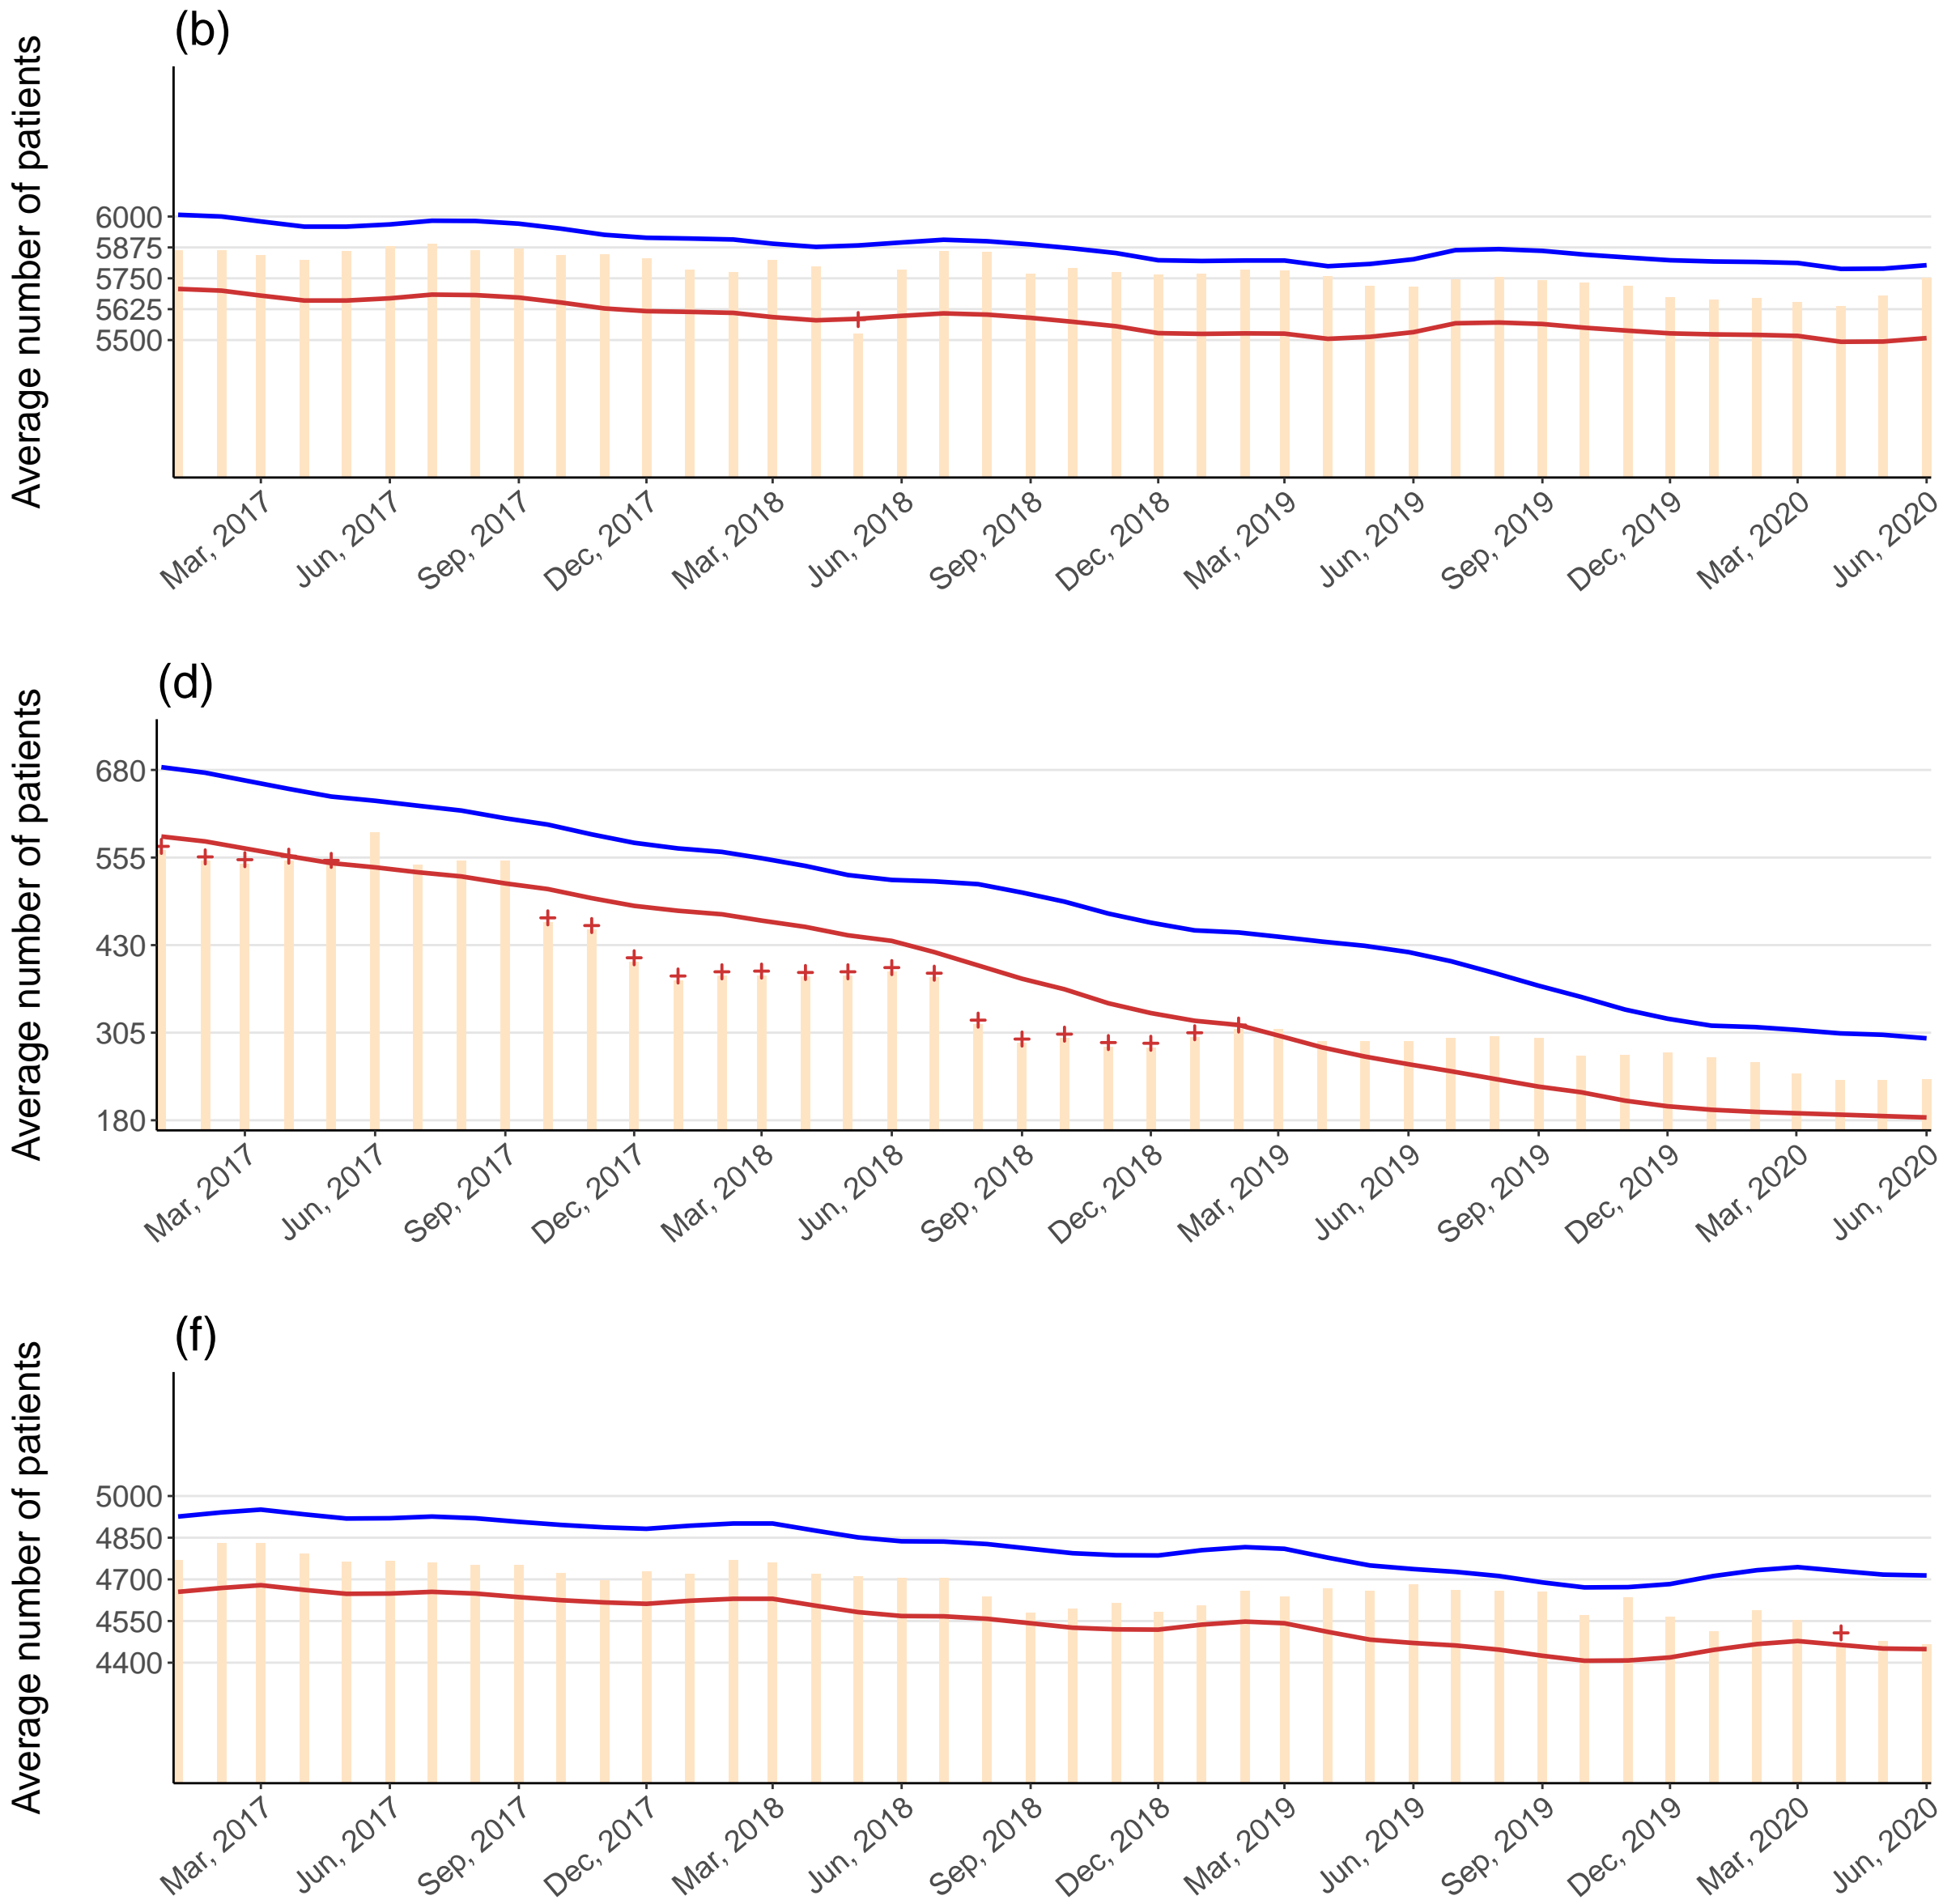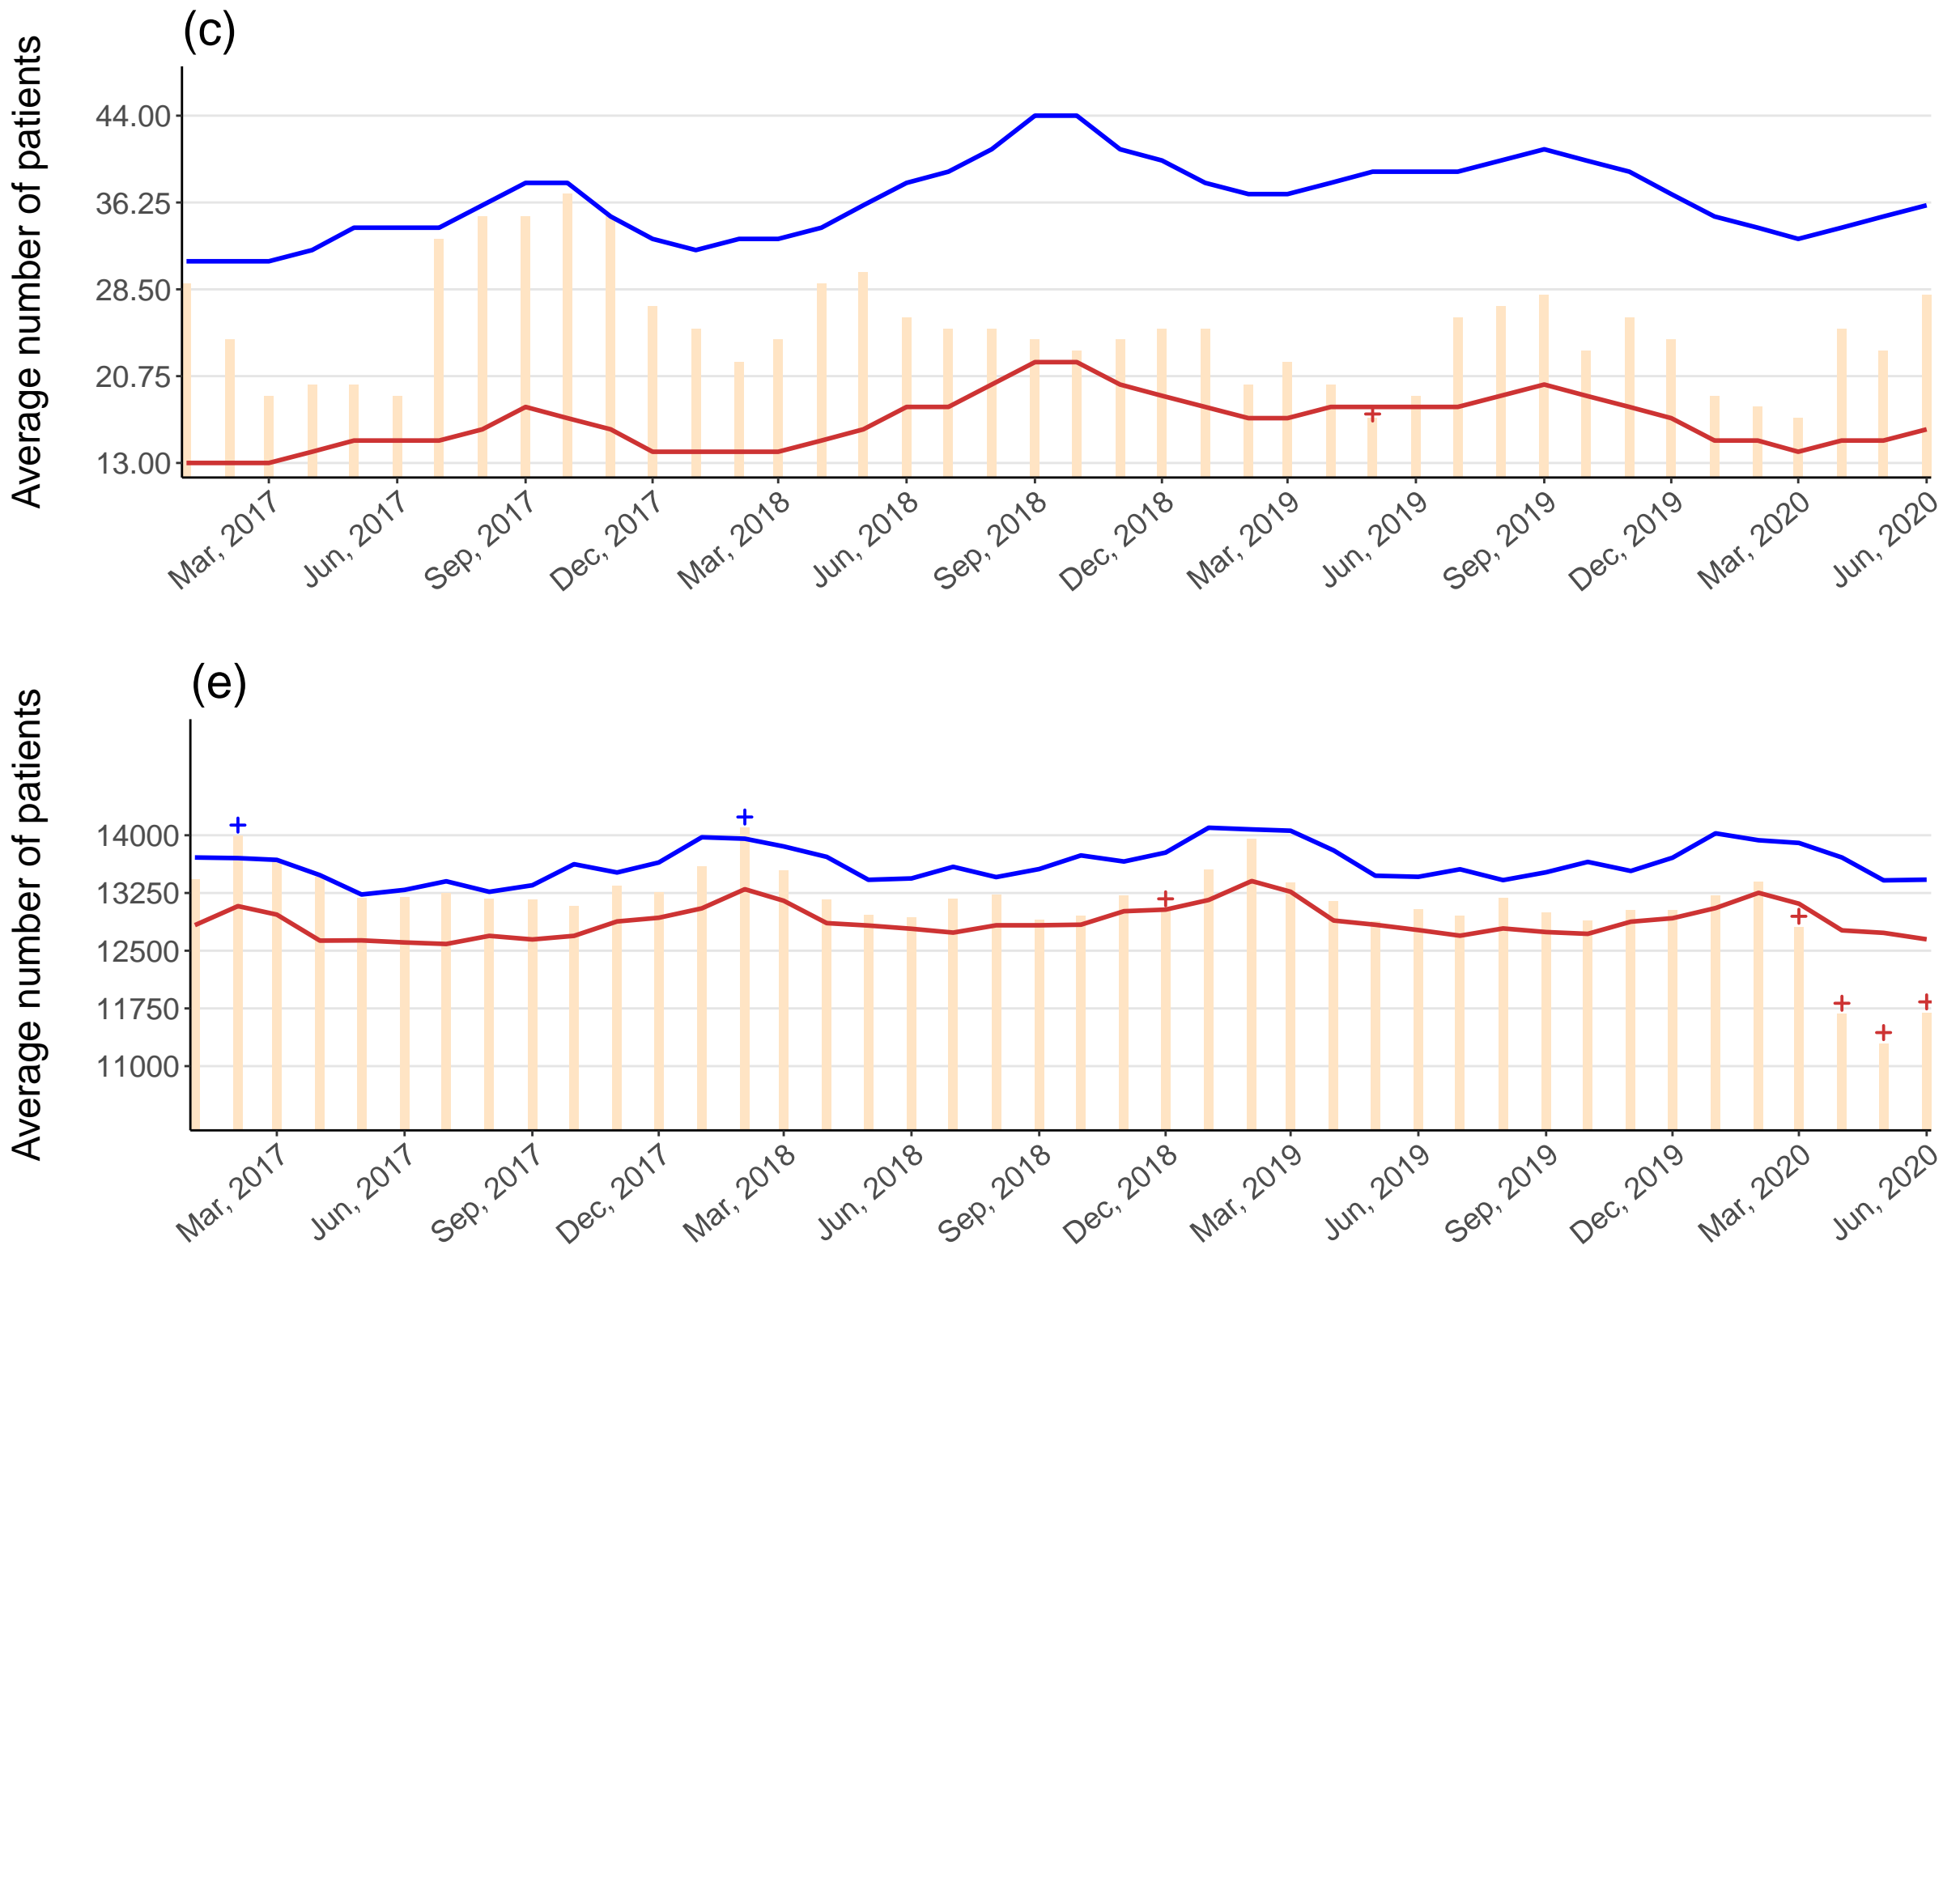

# Tochigi

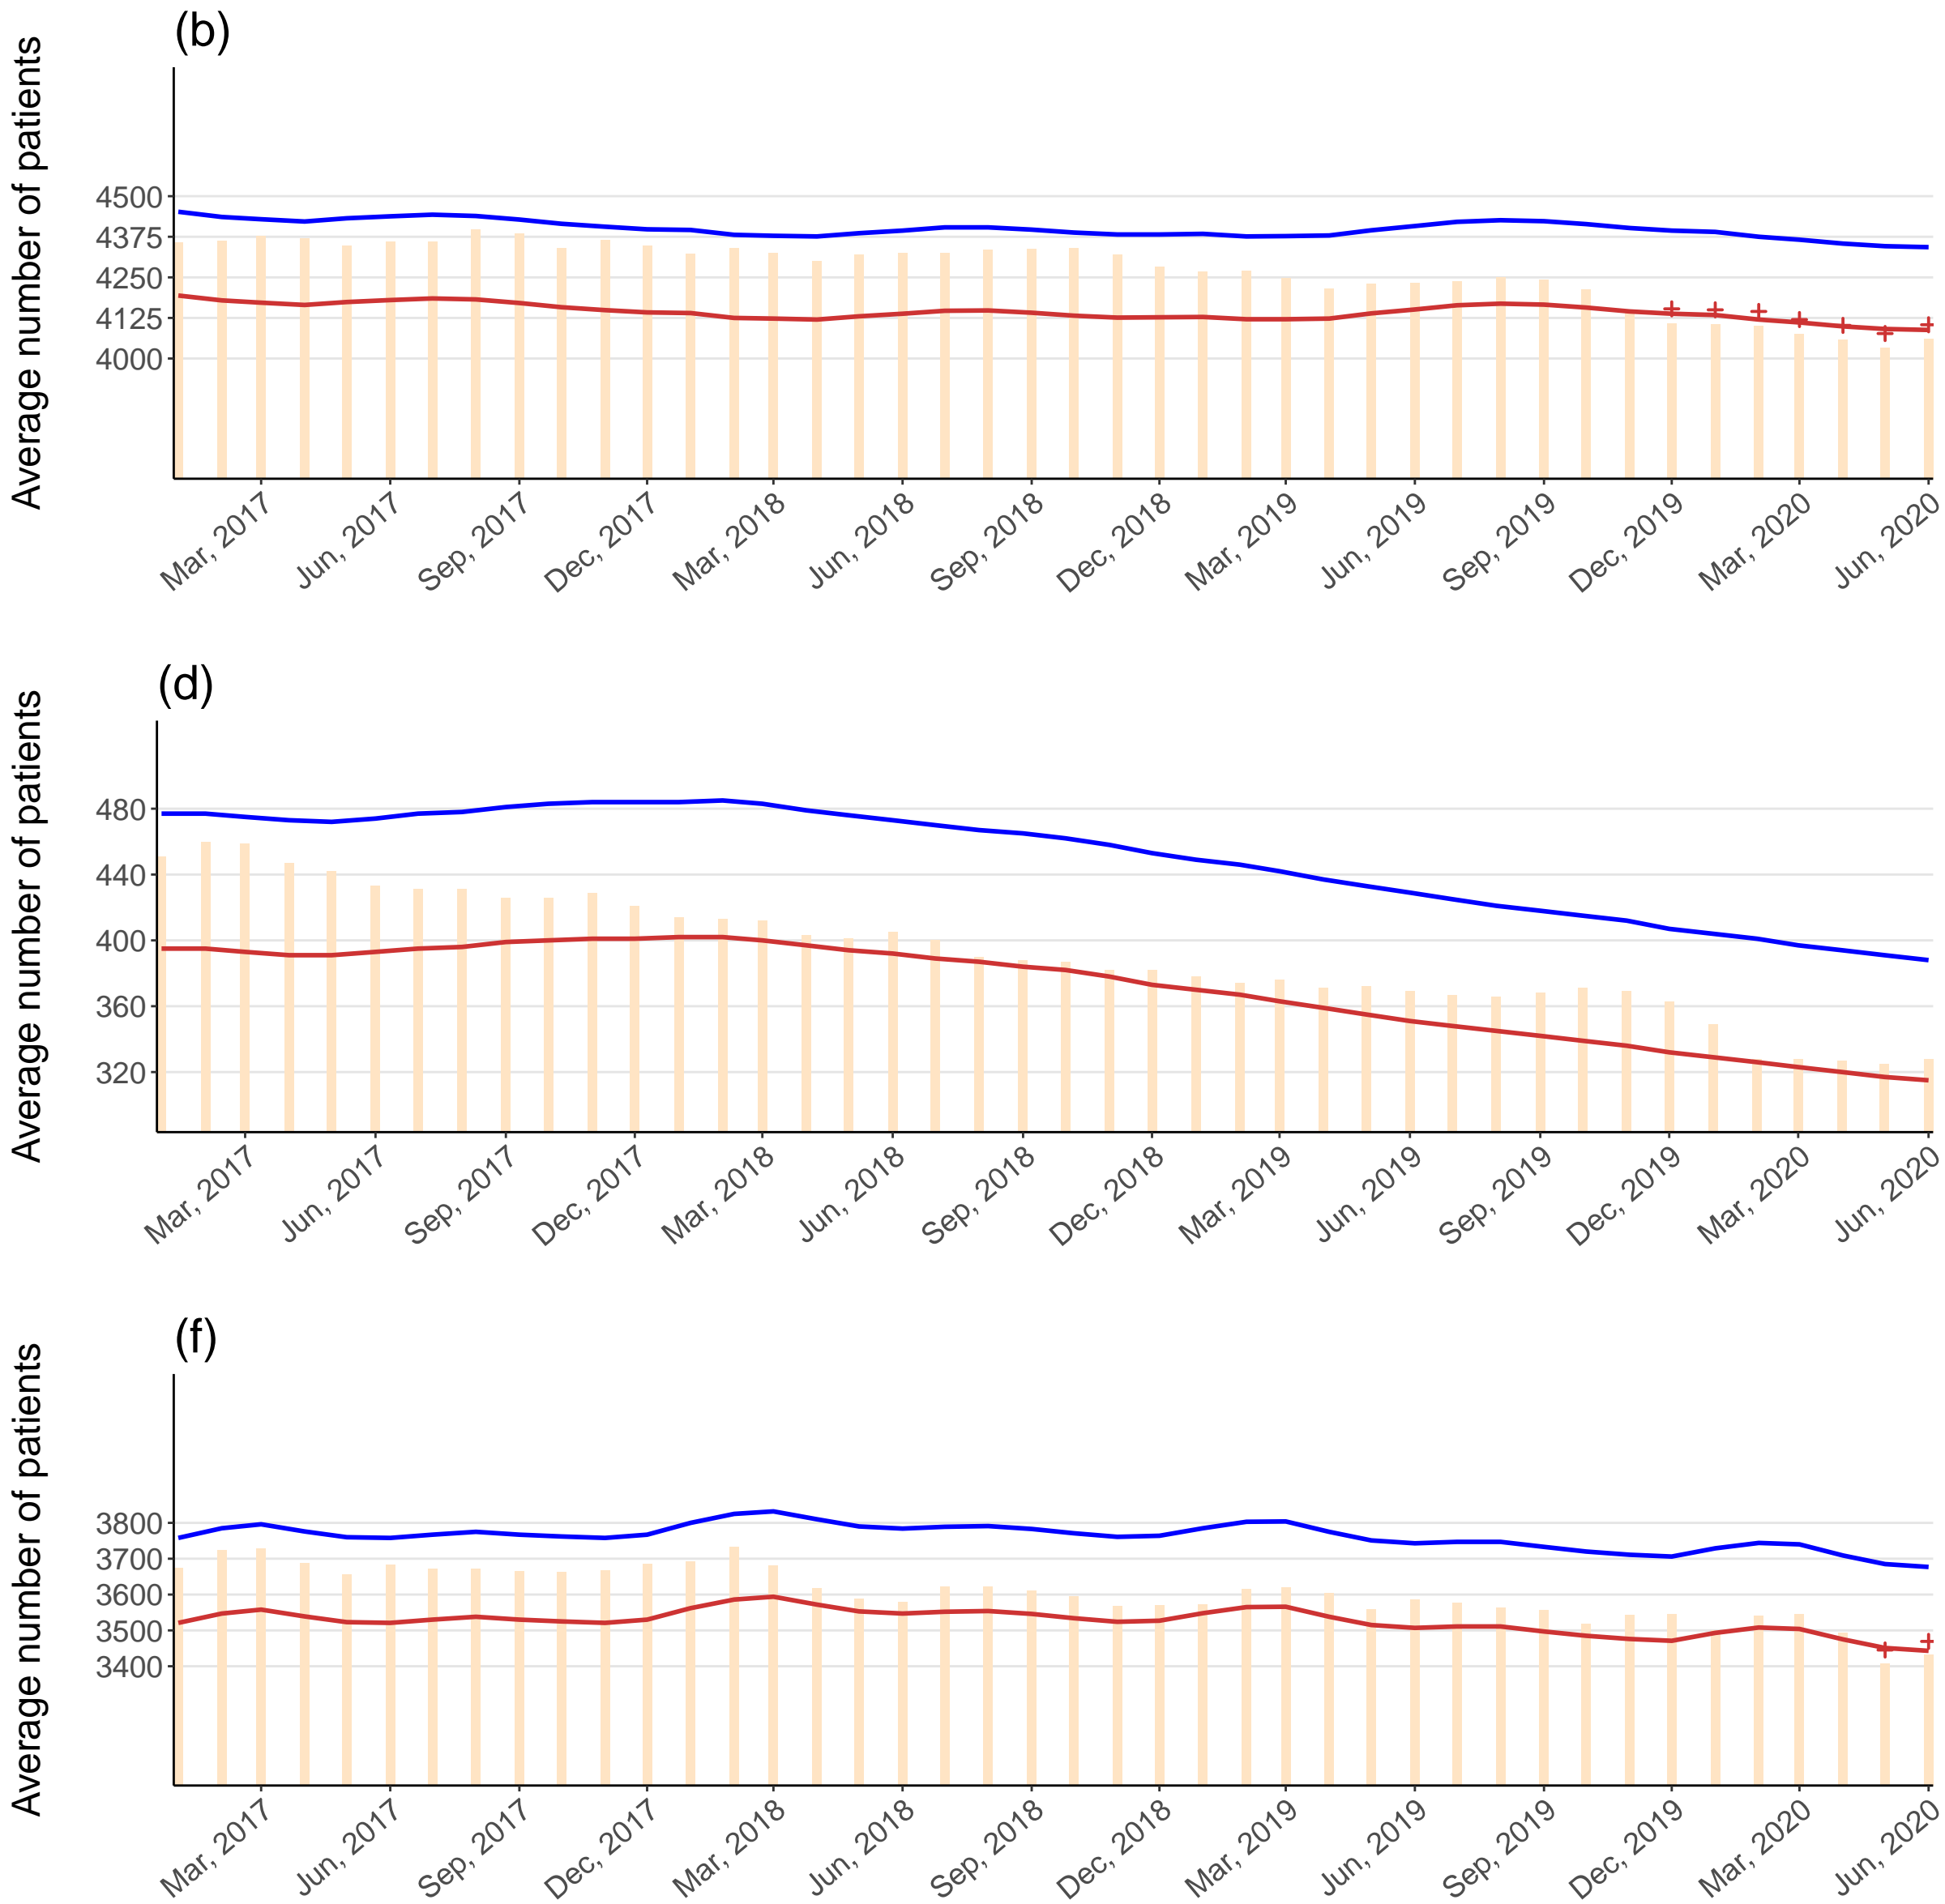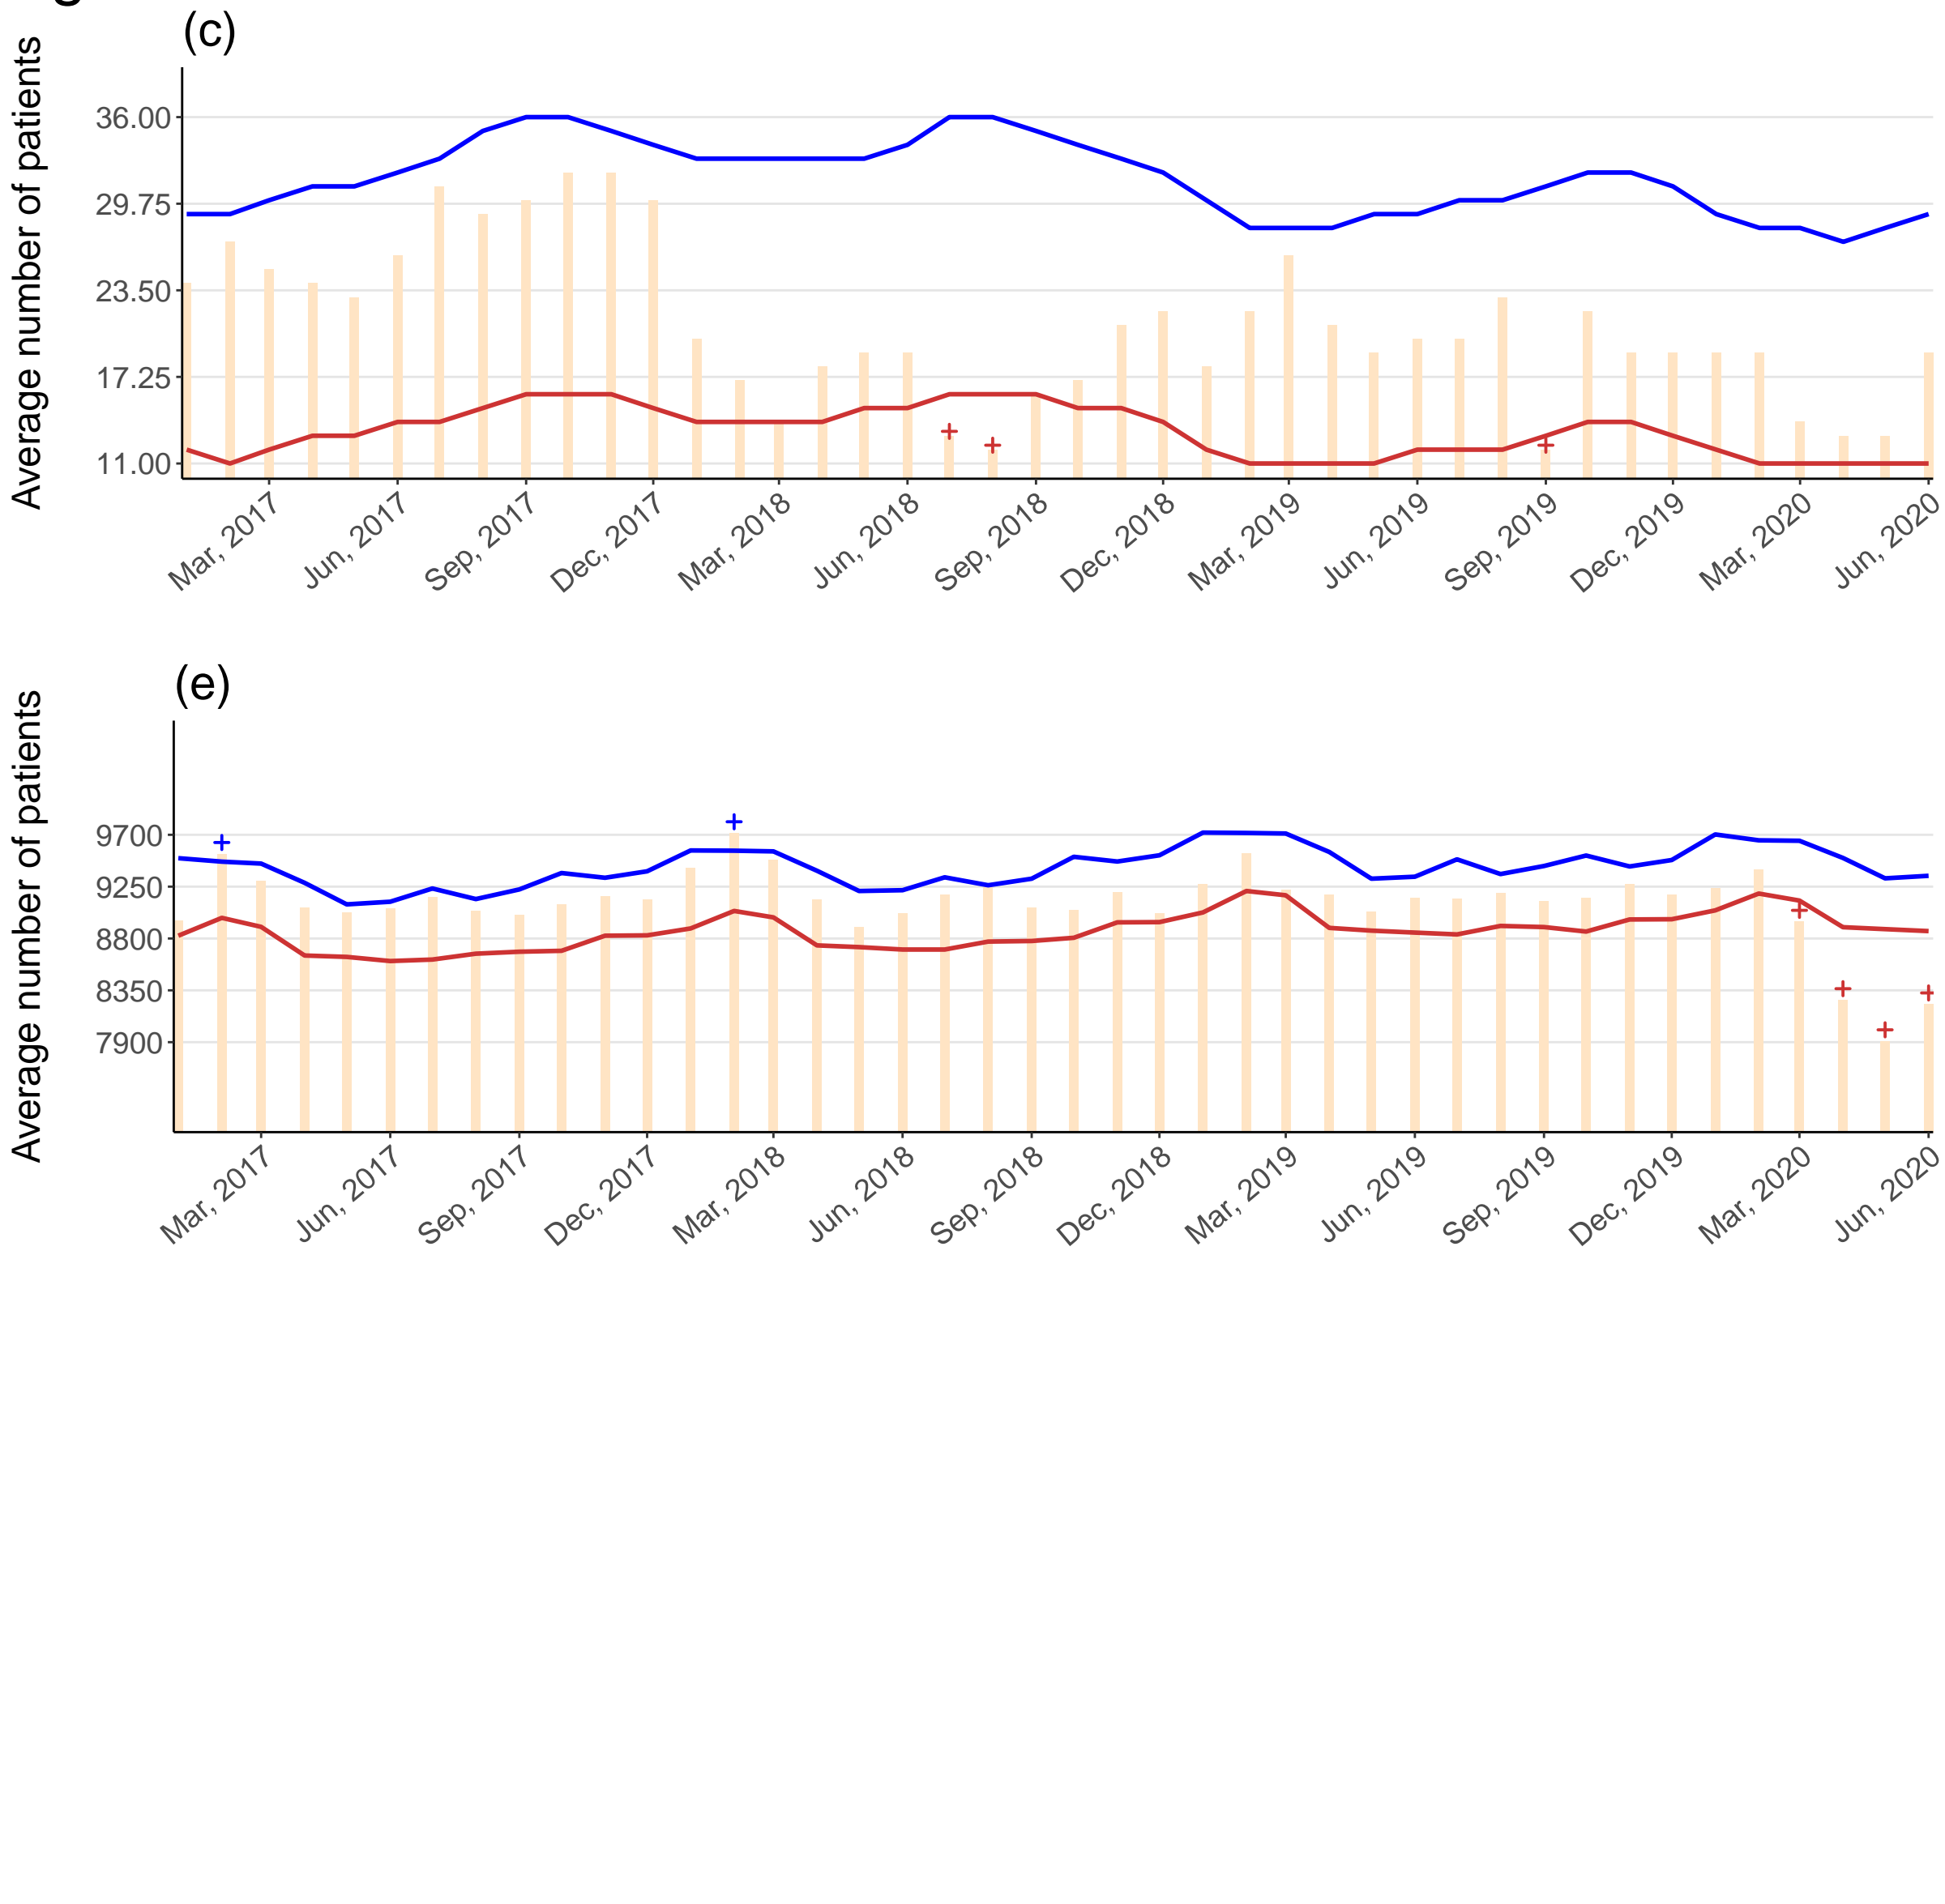



Gunma

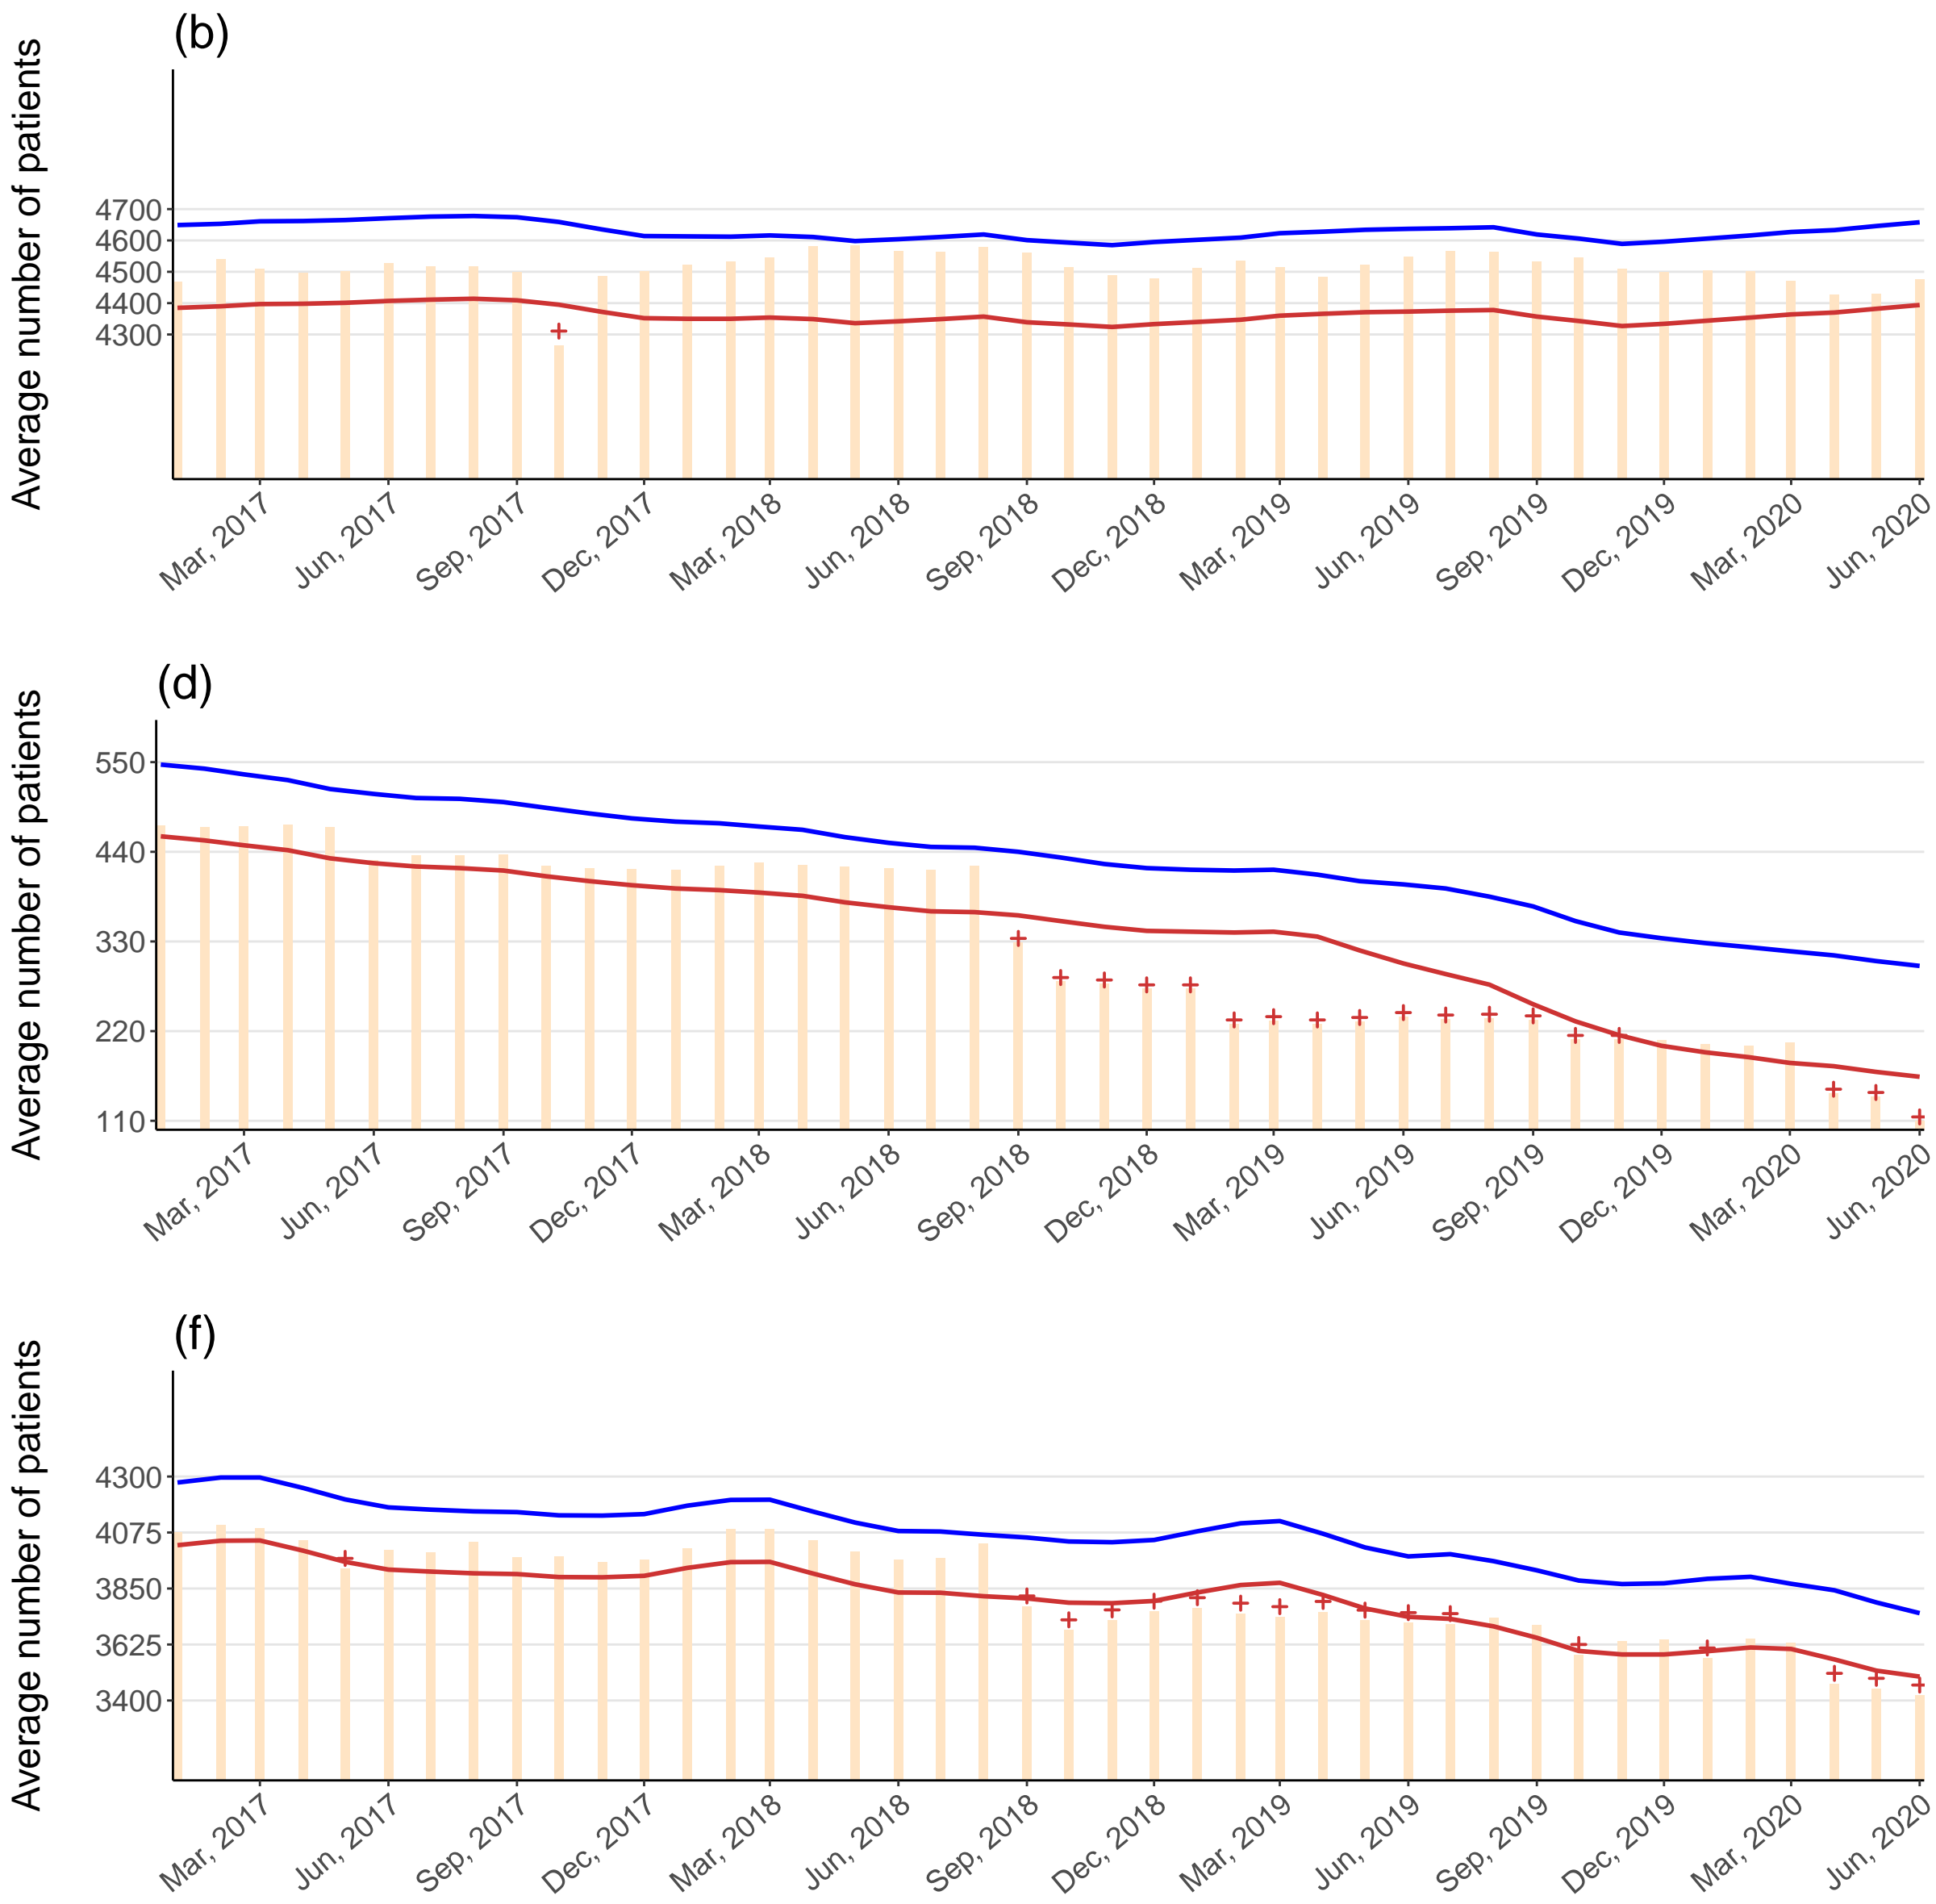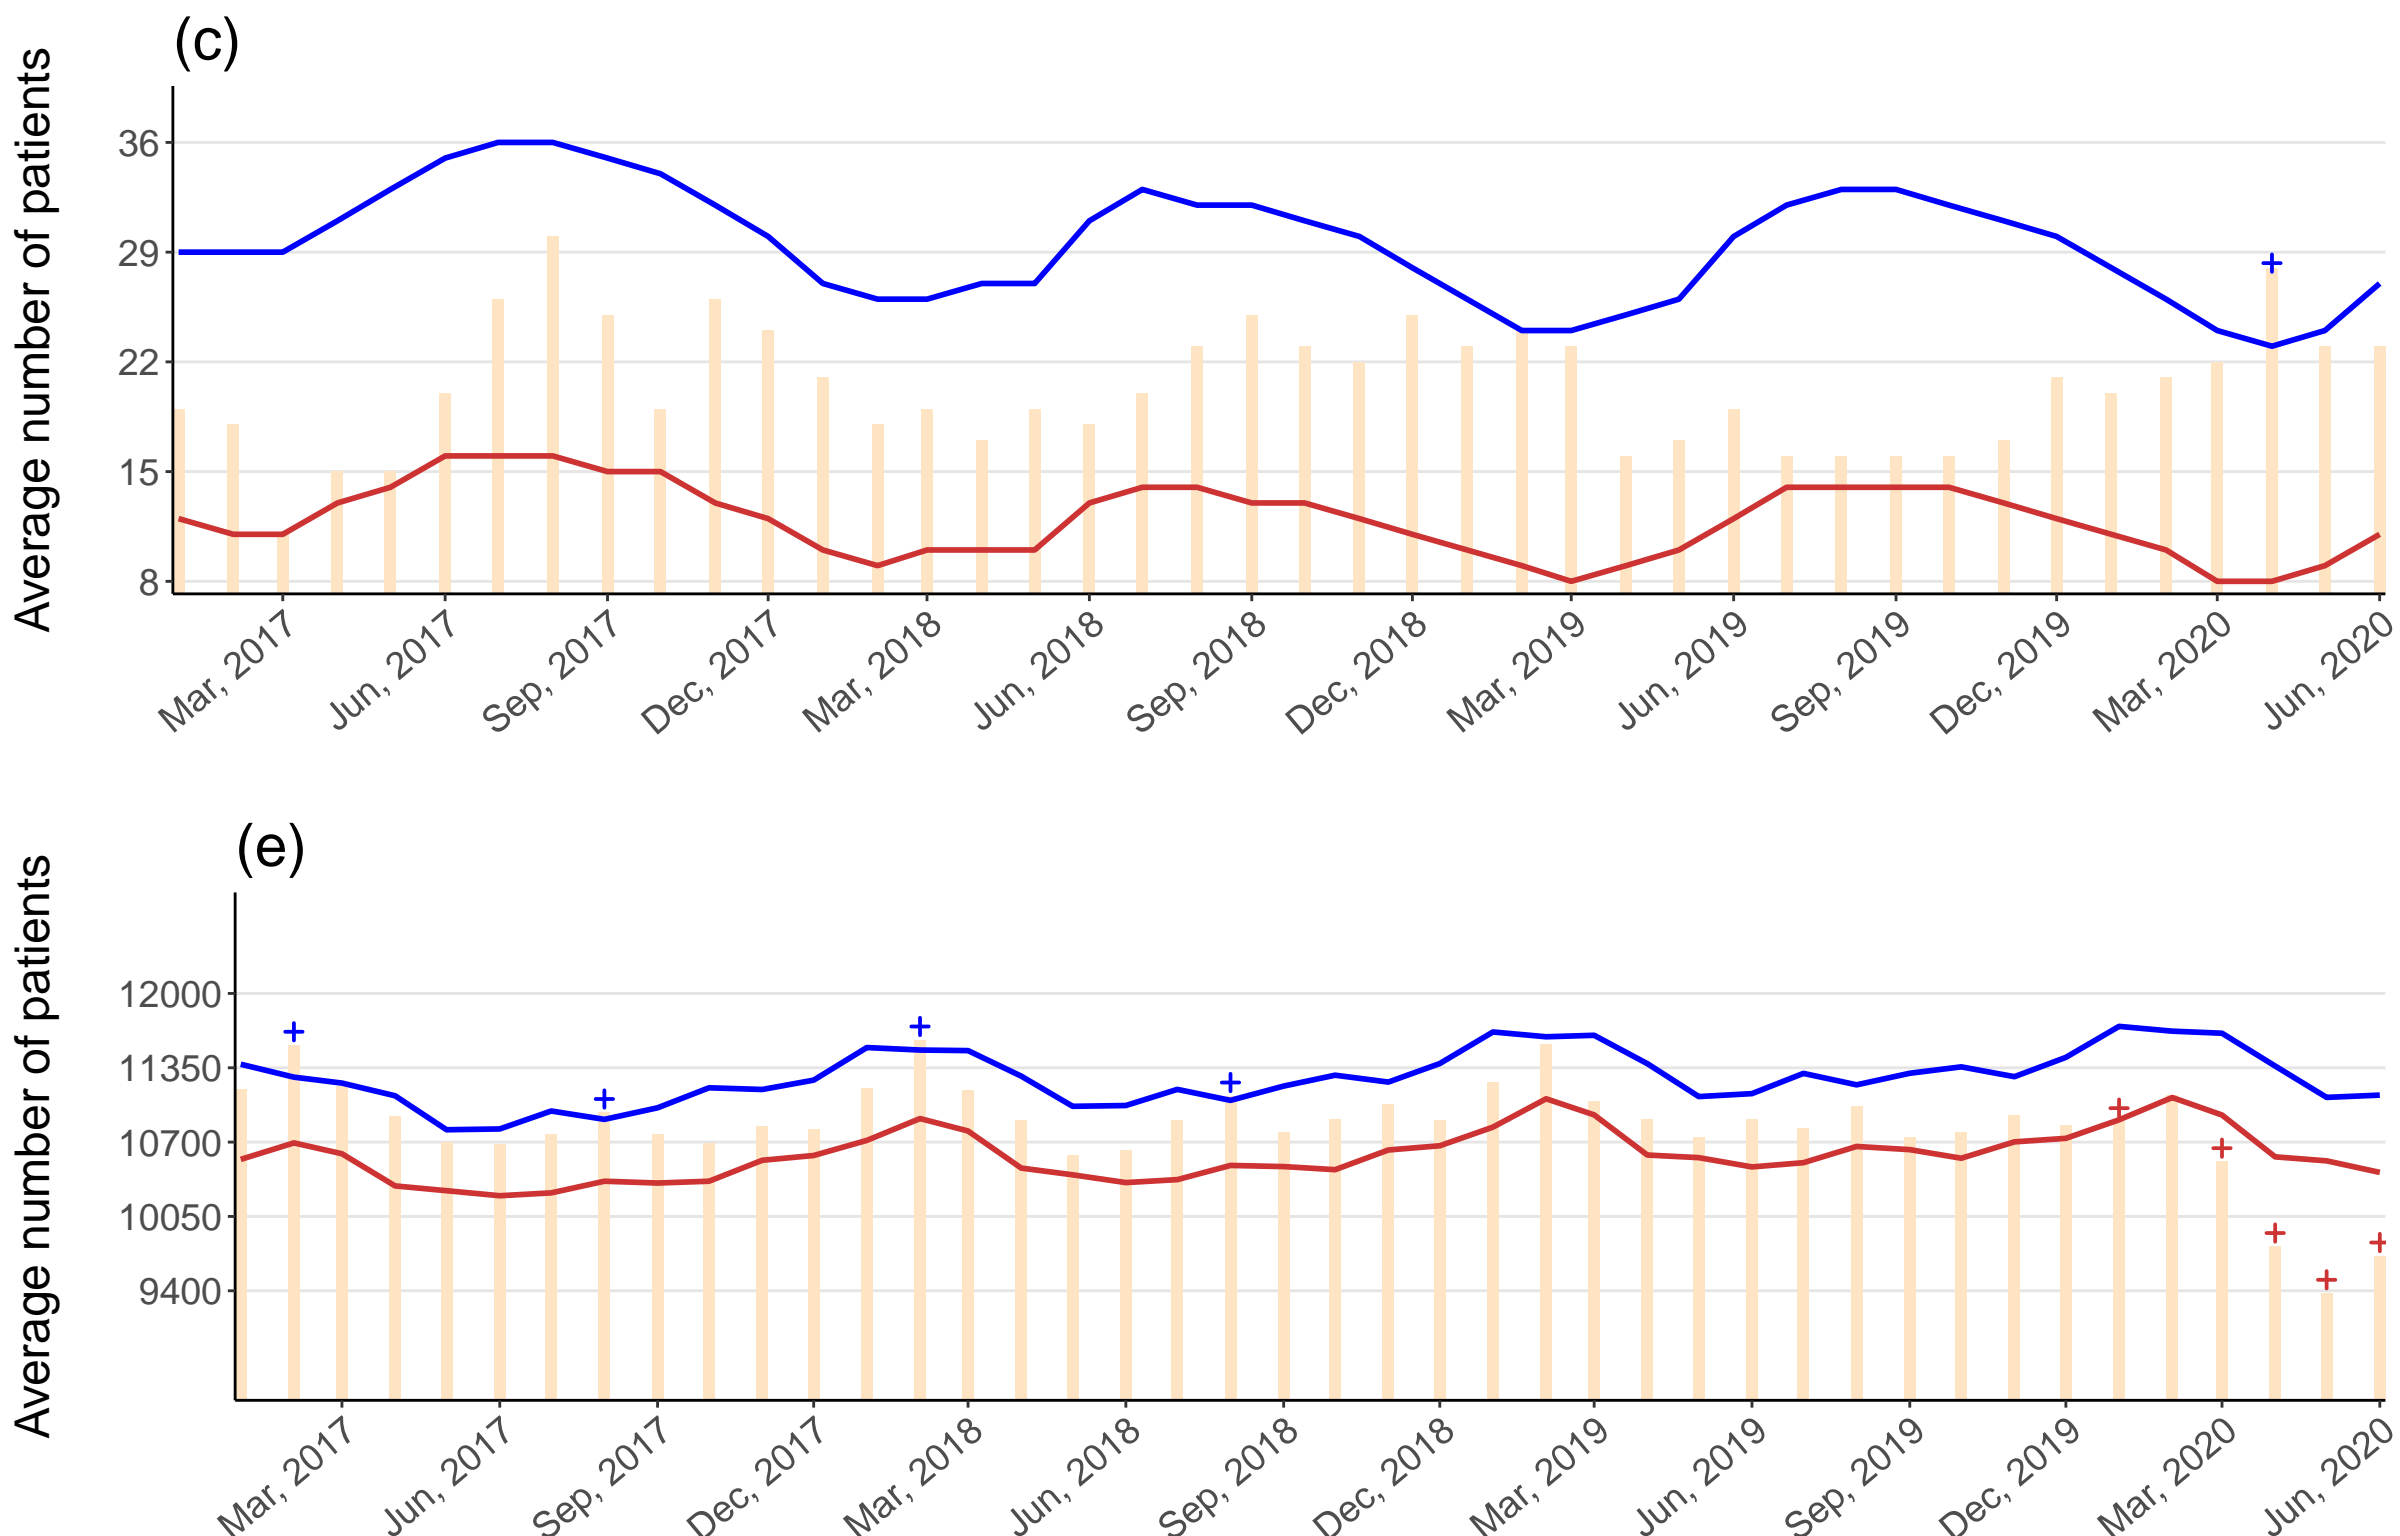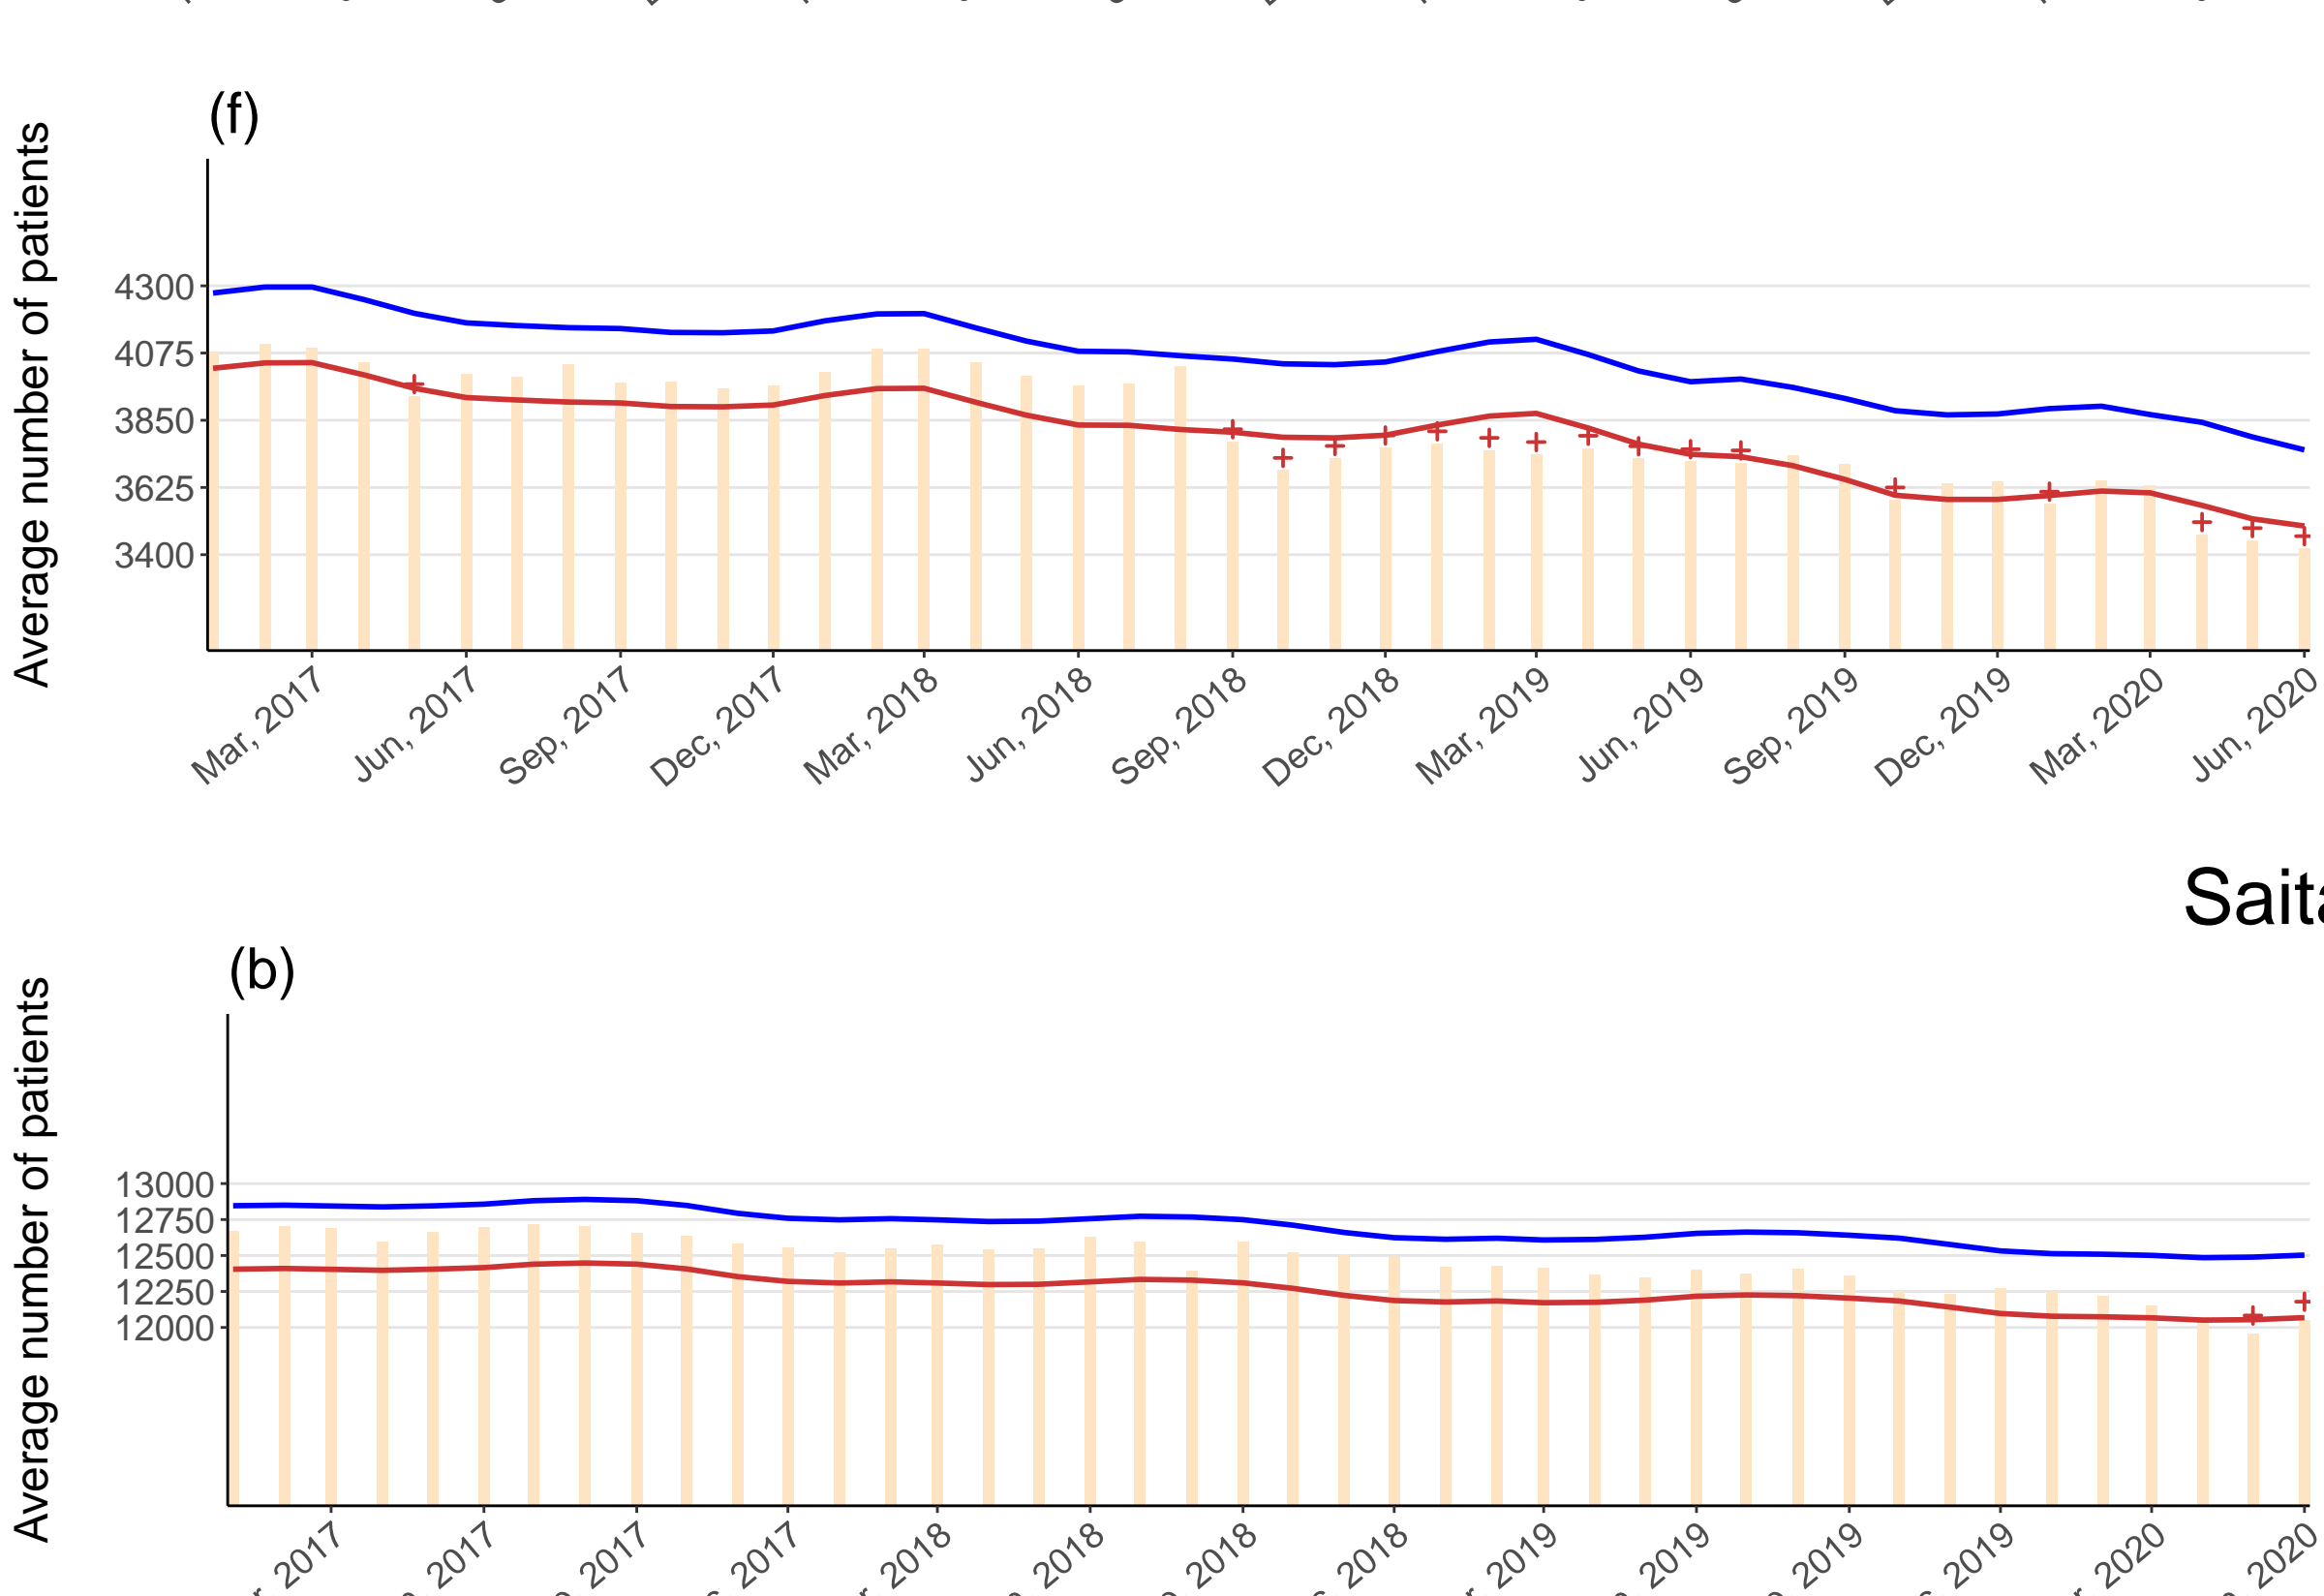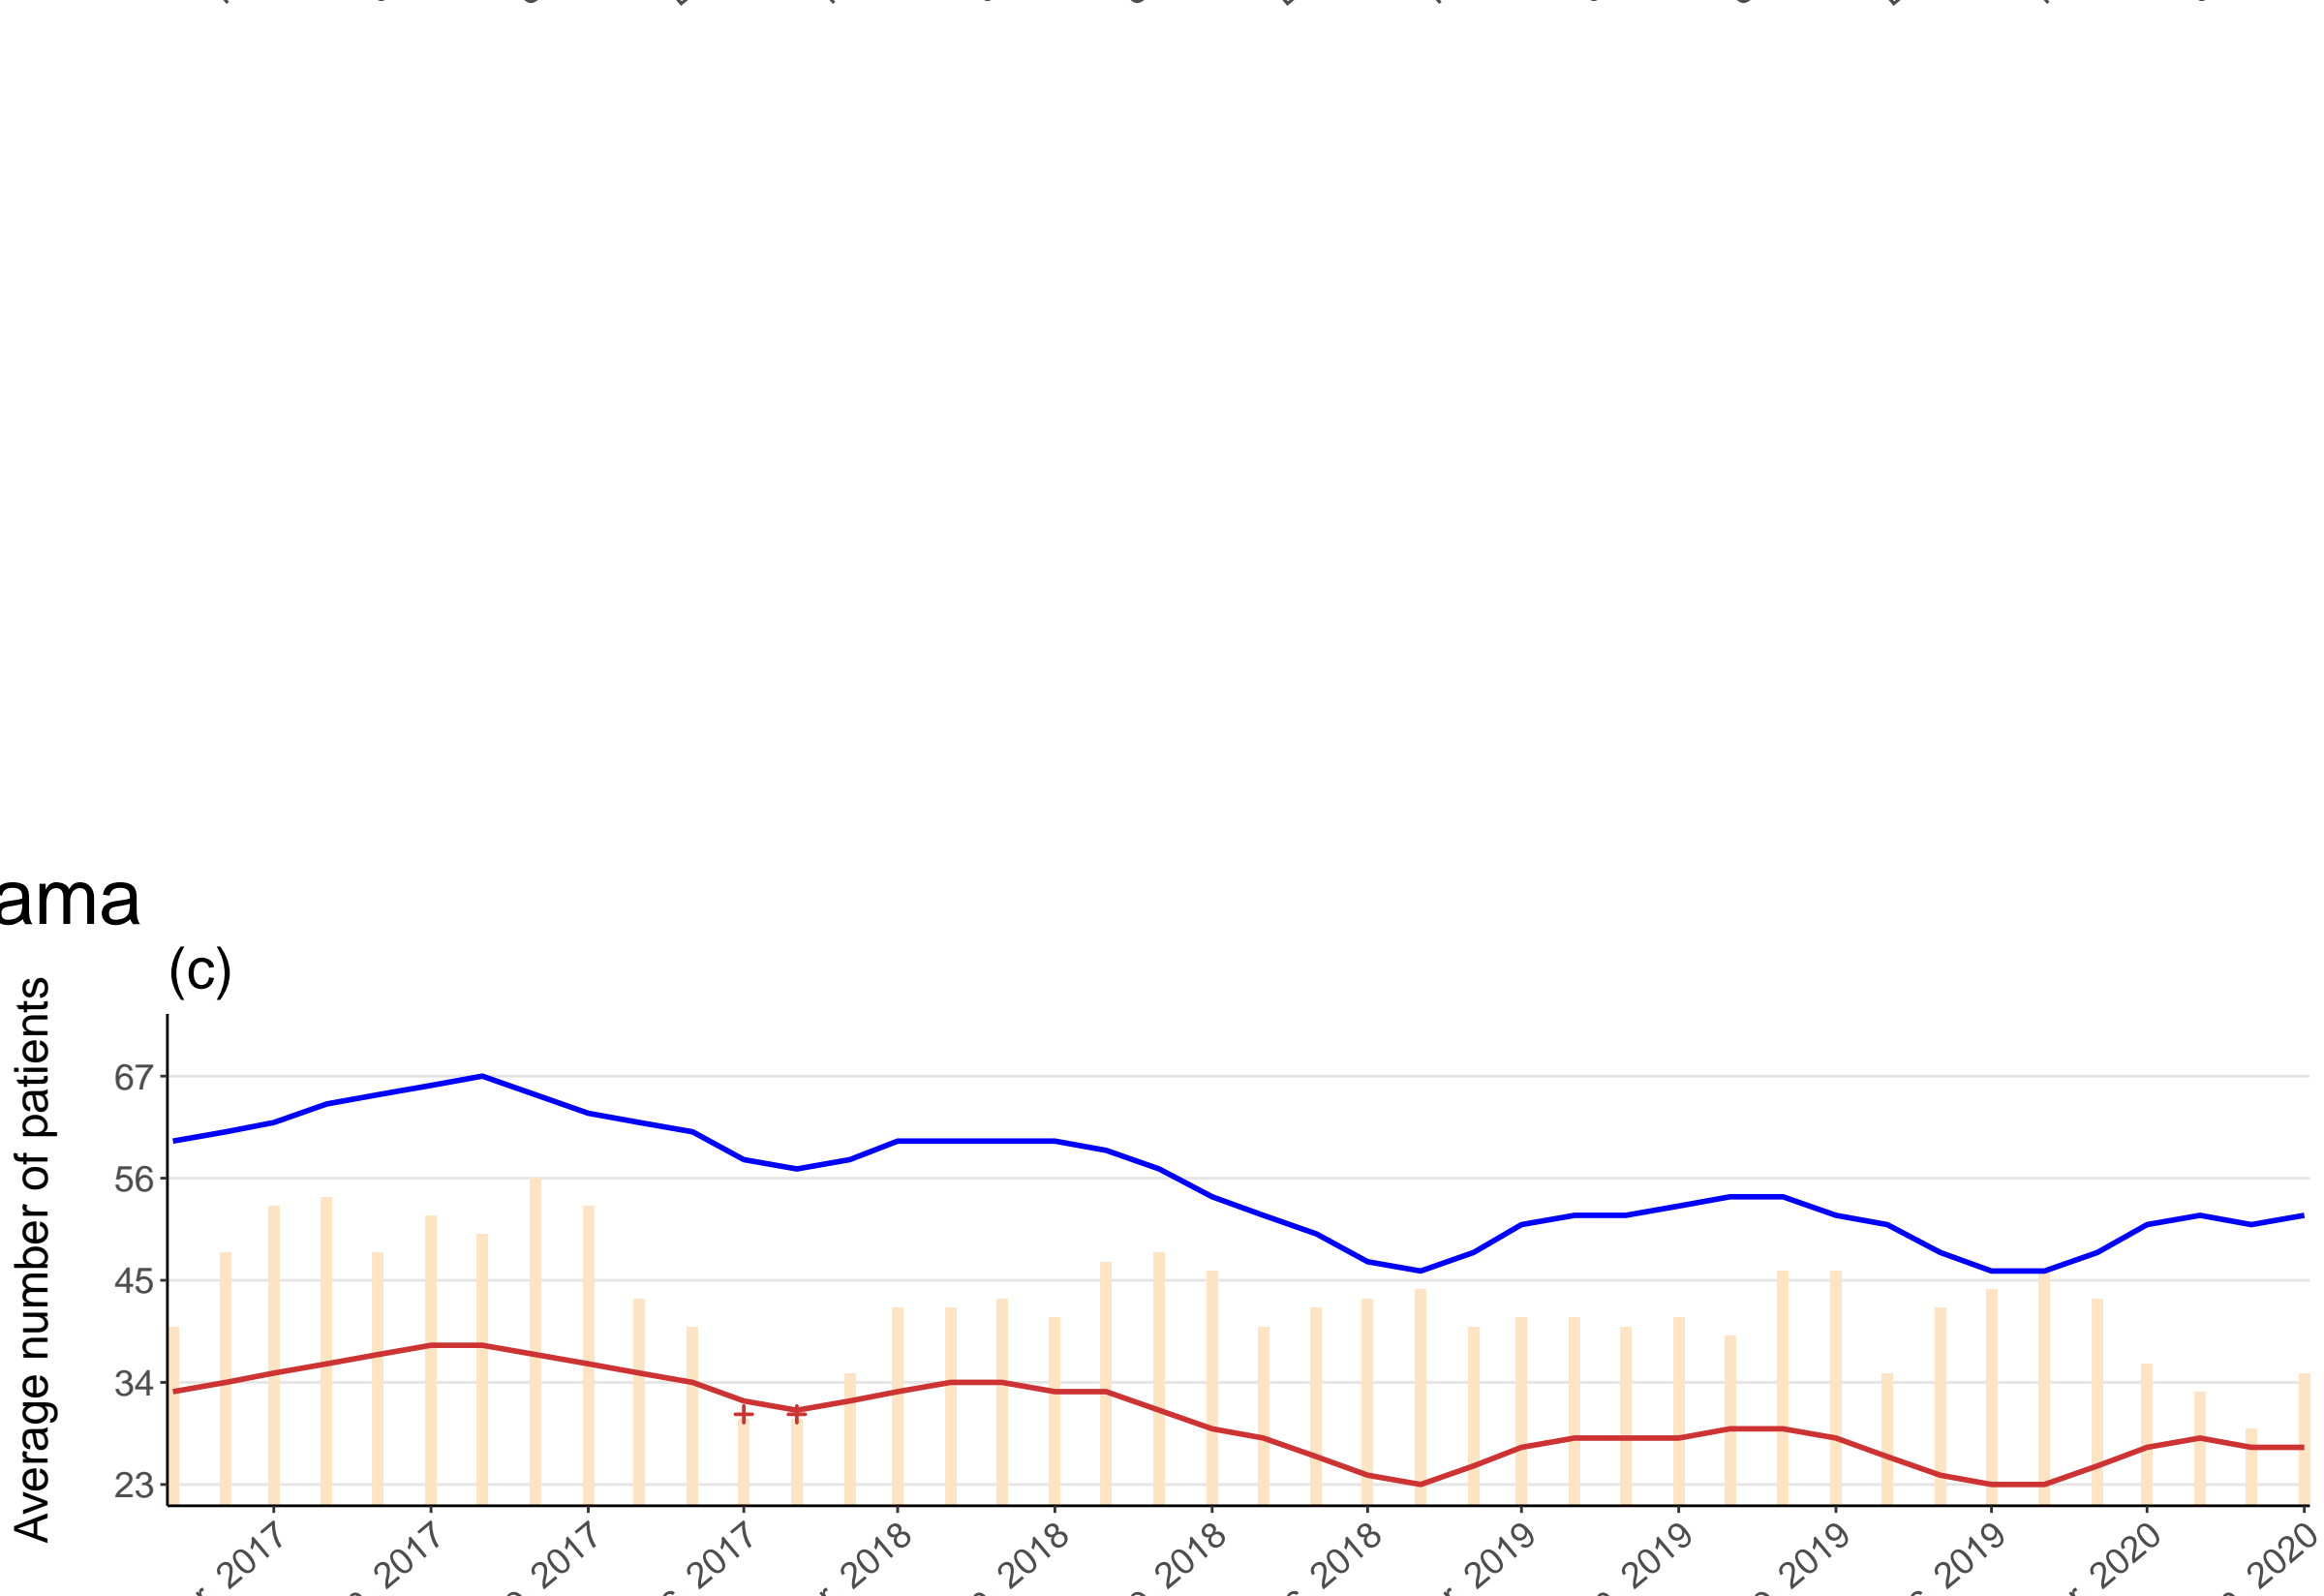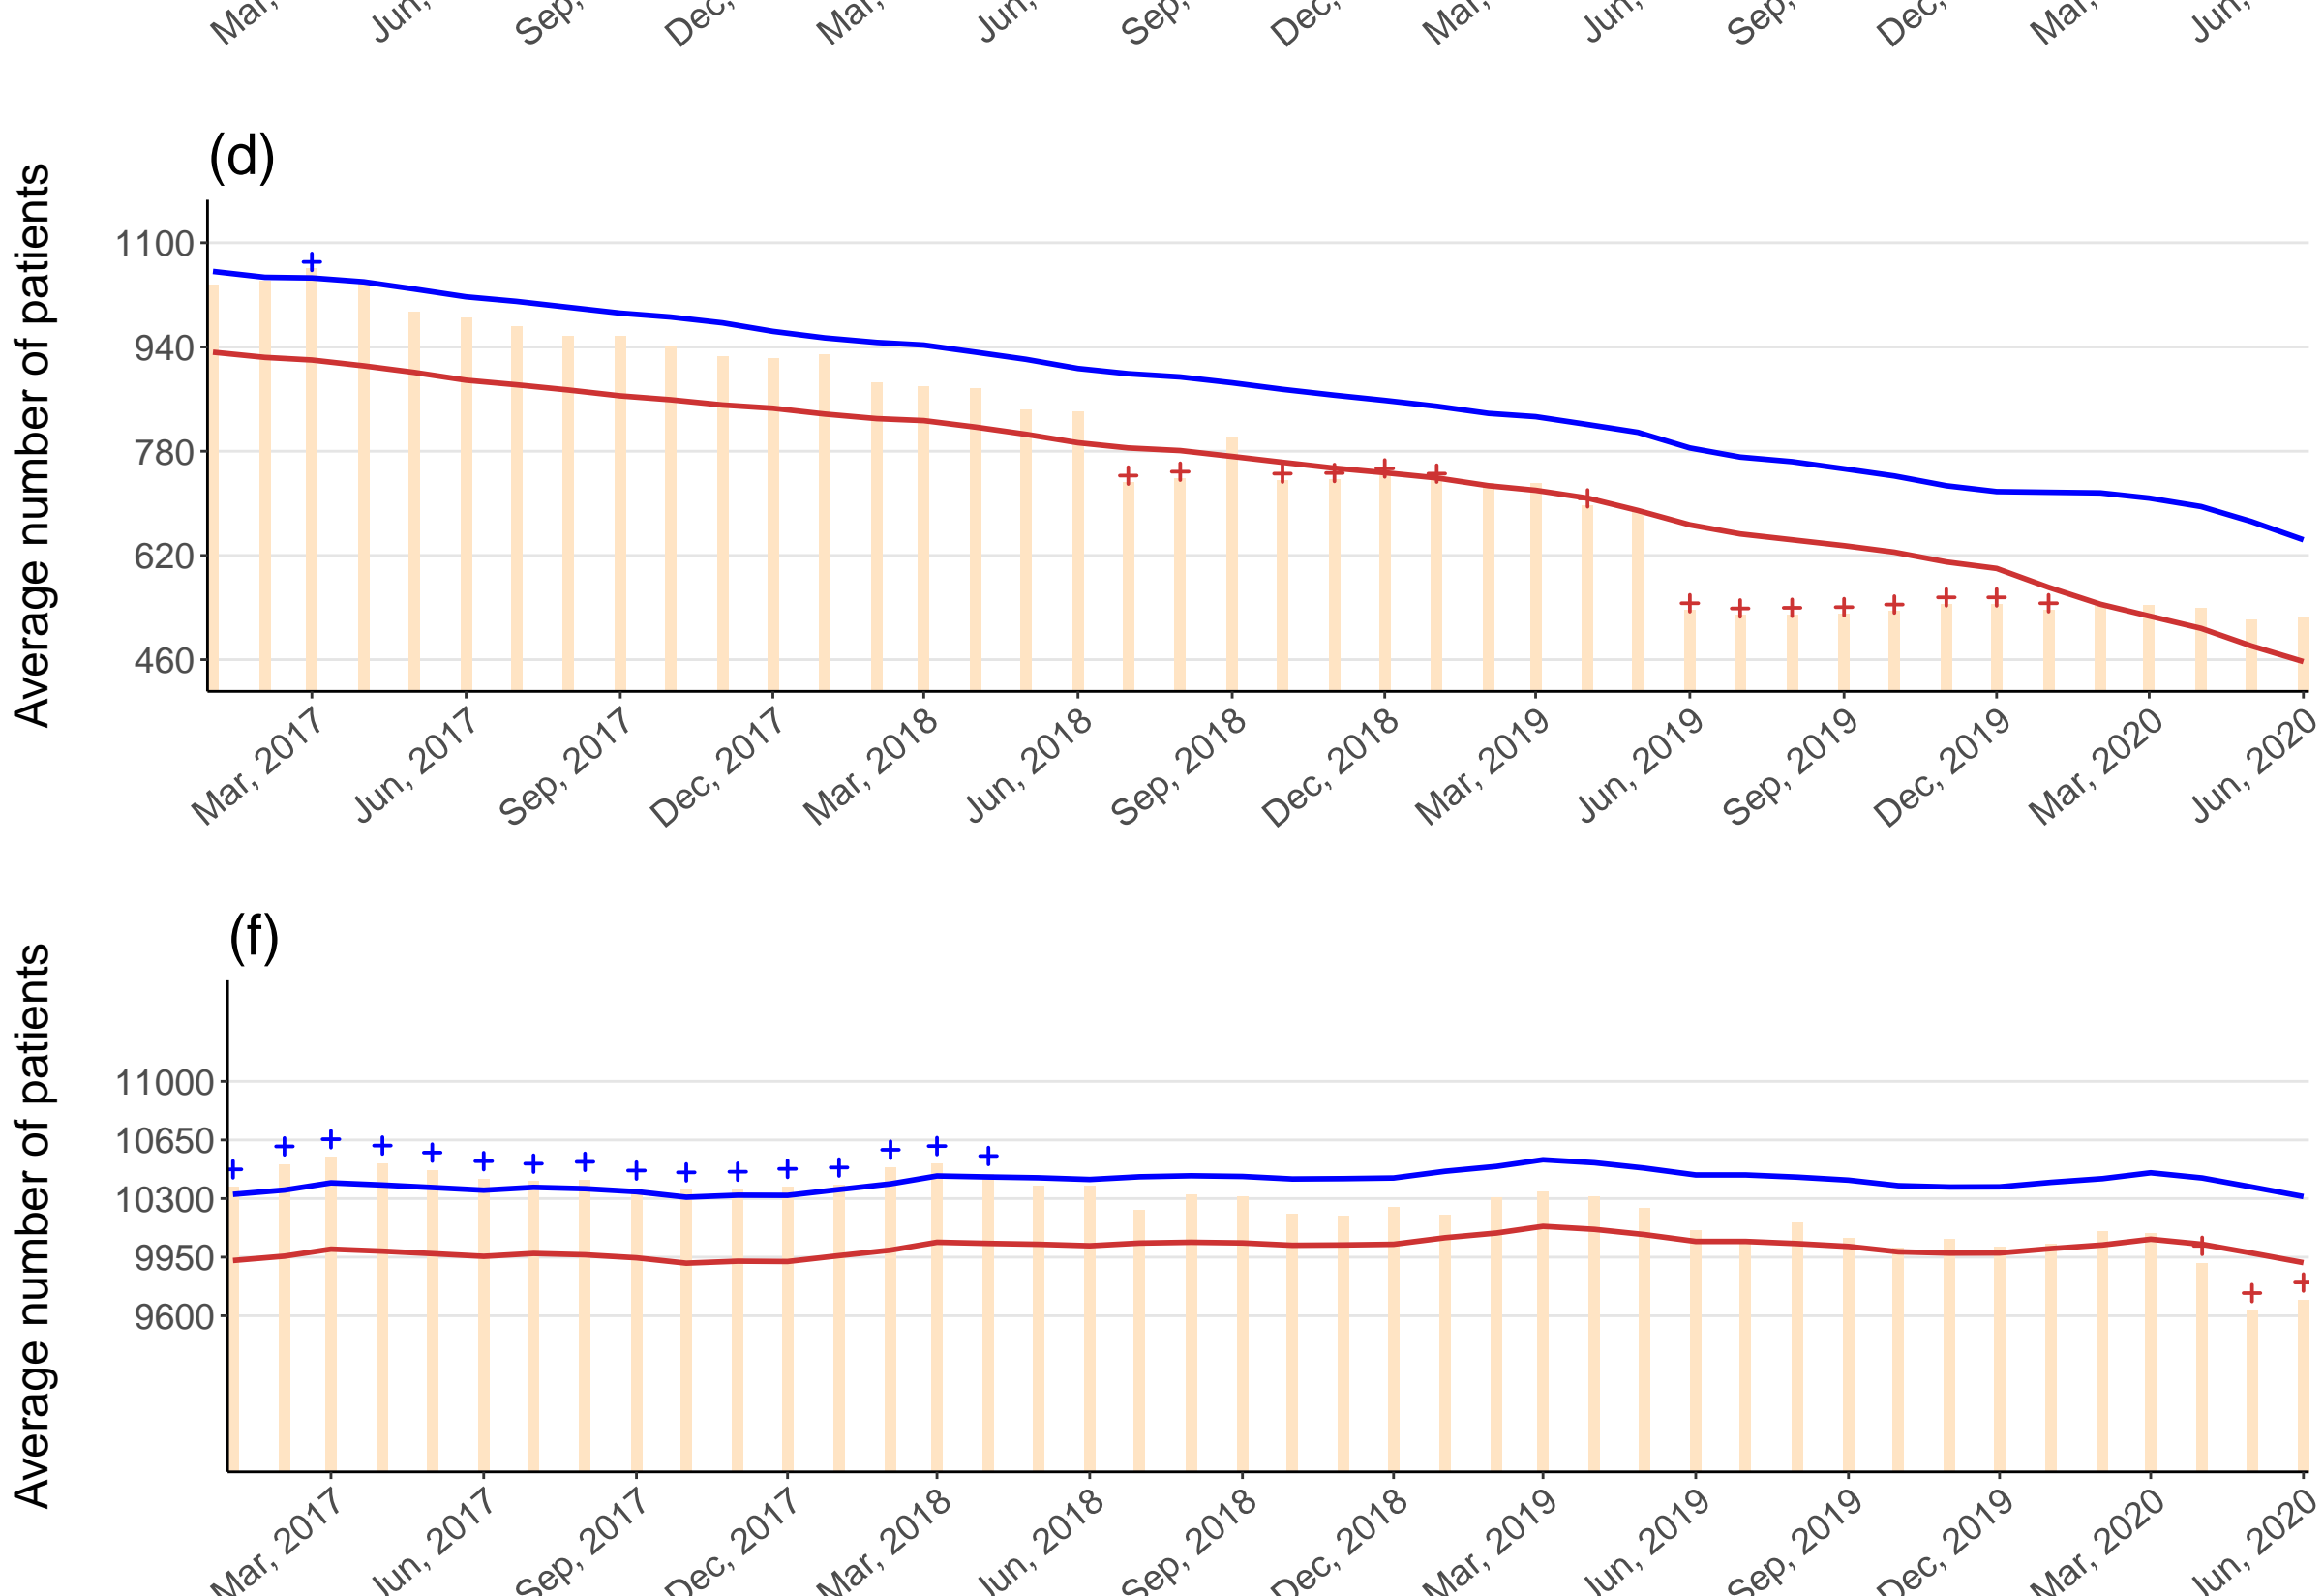

Saitama

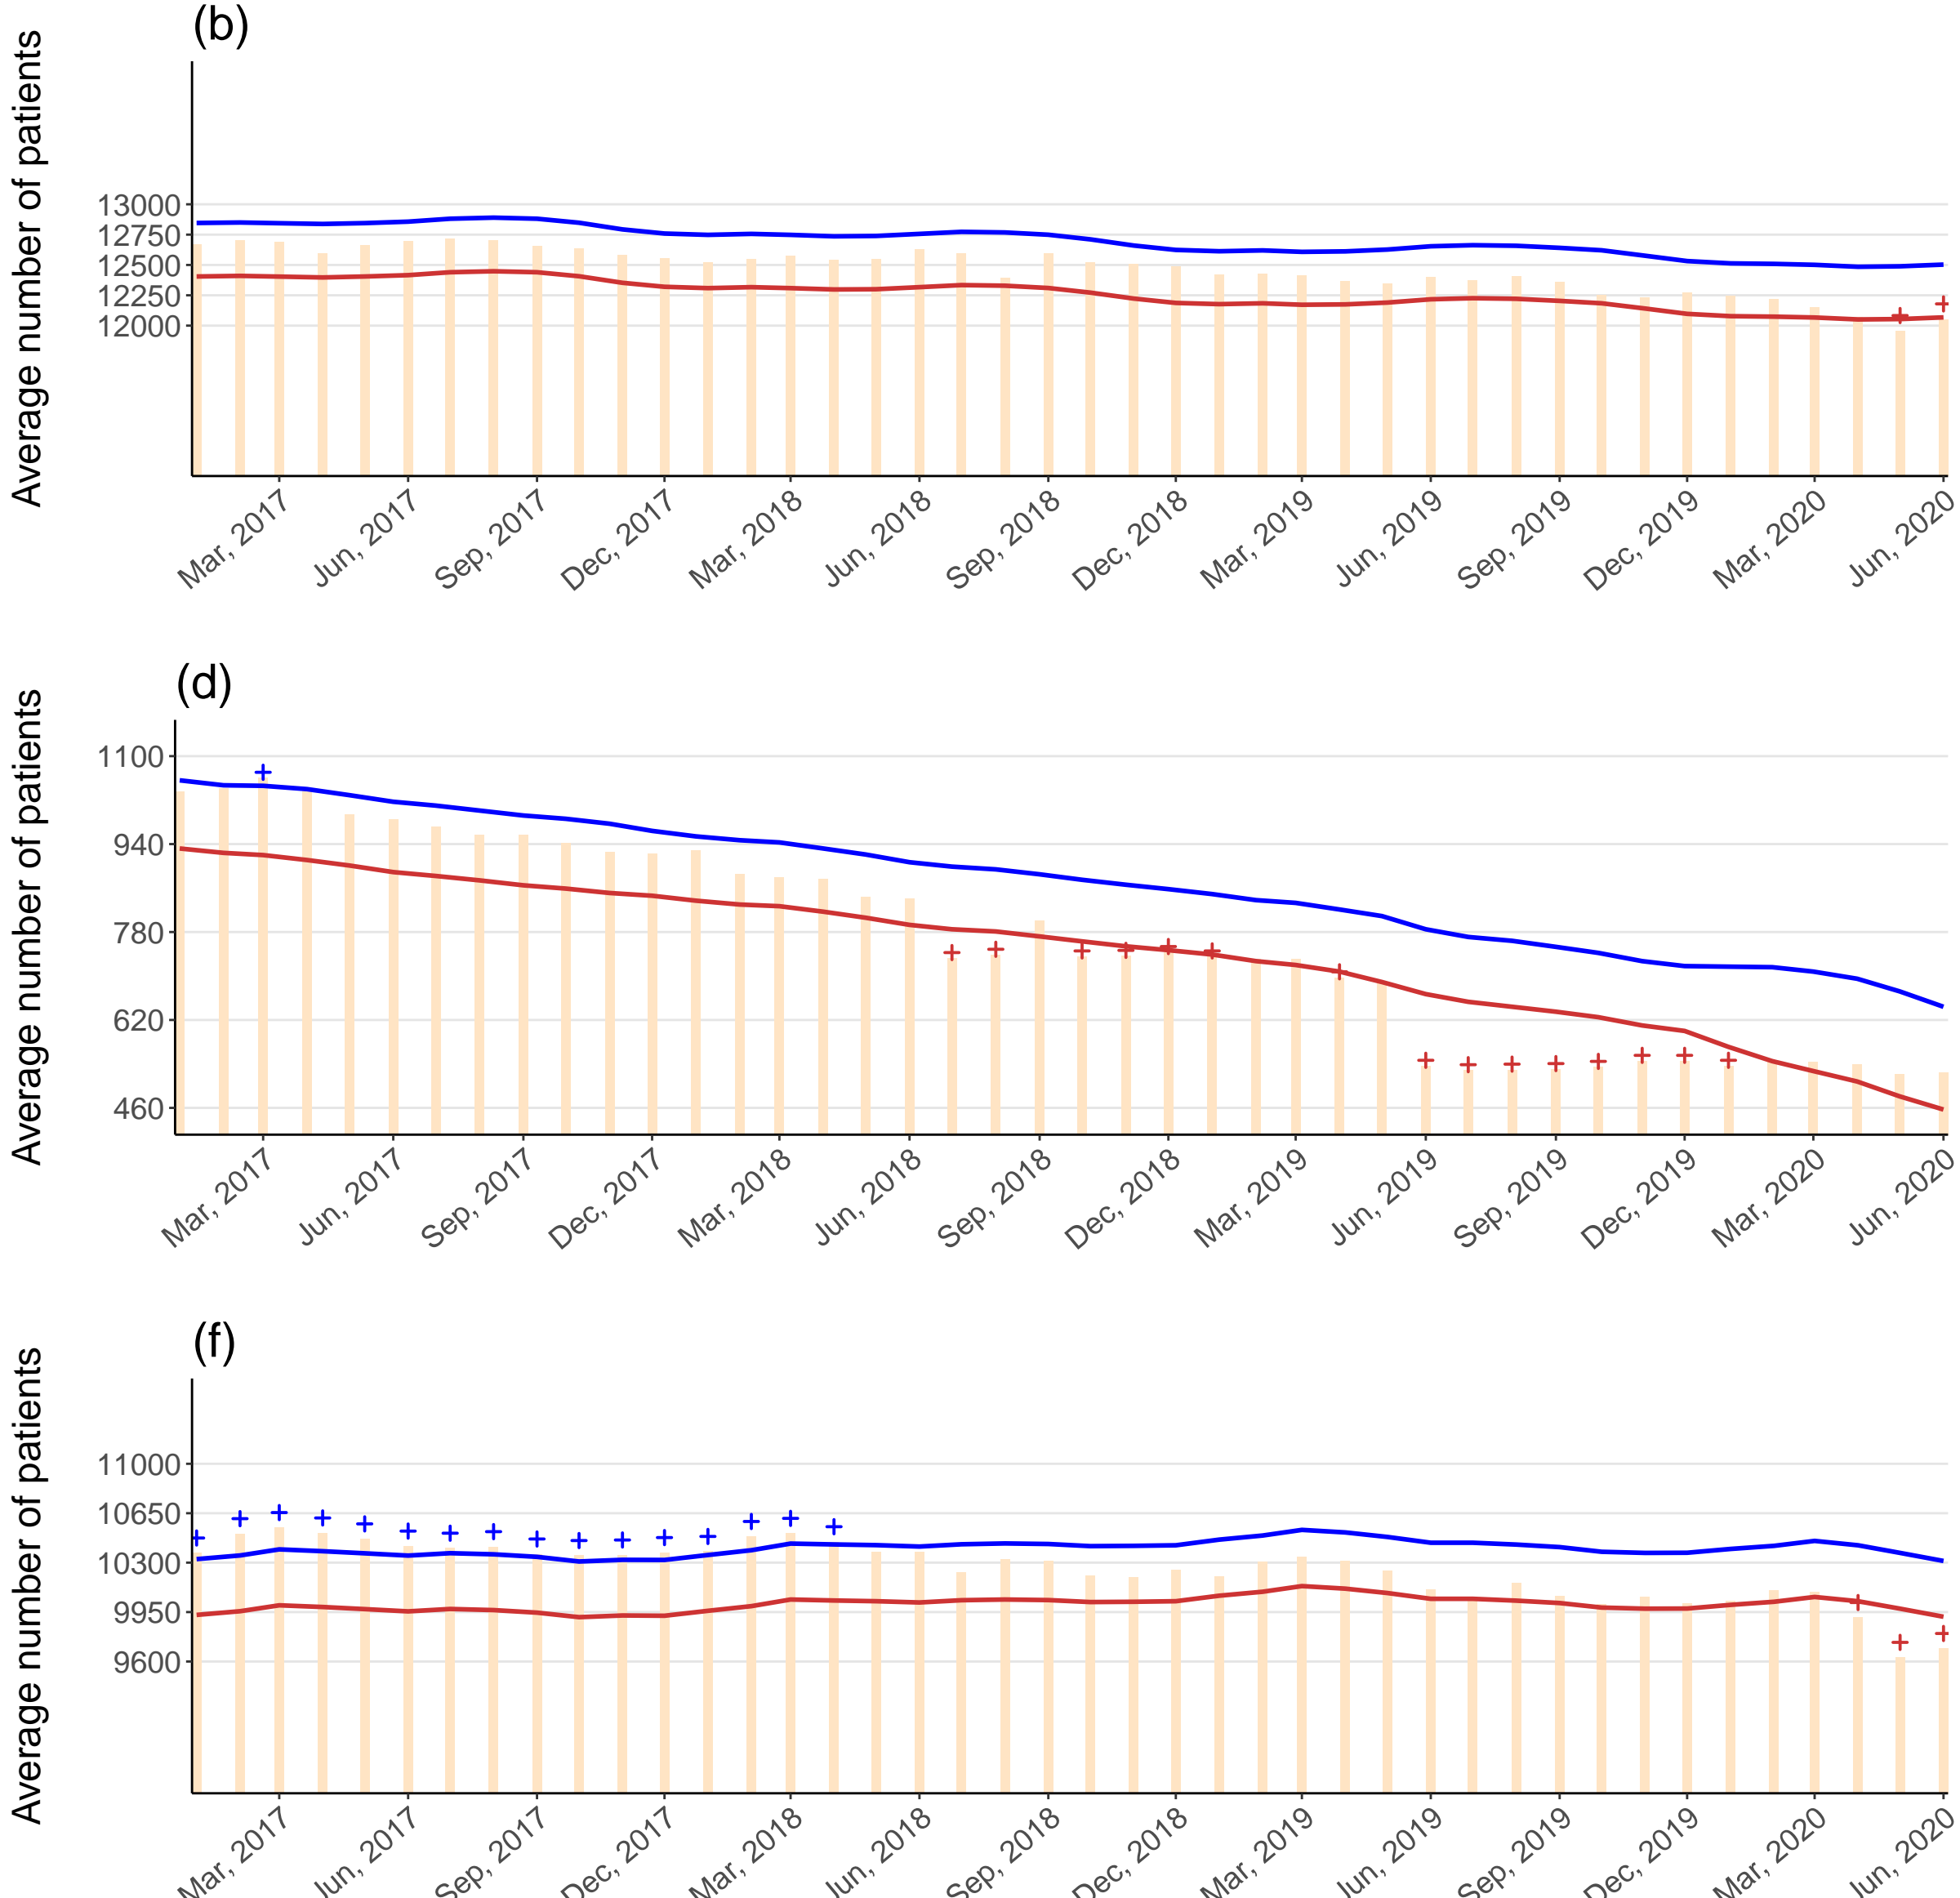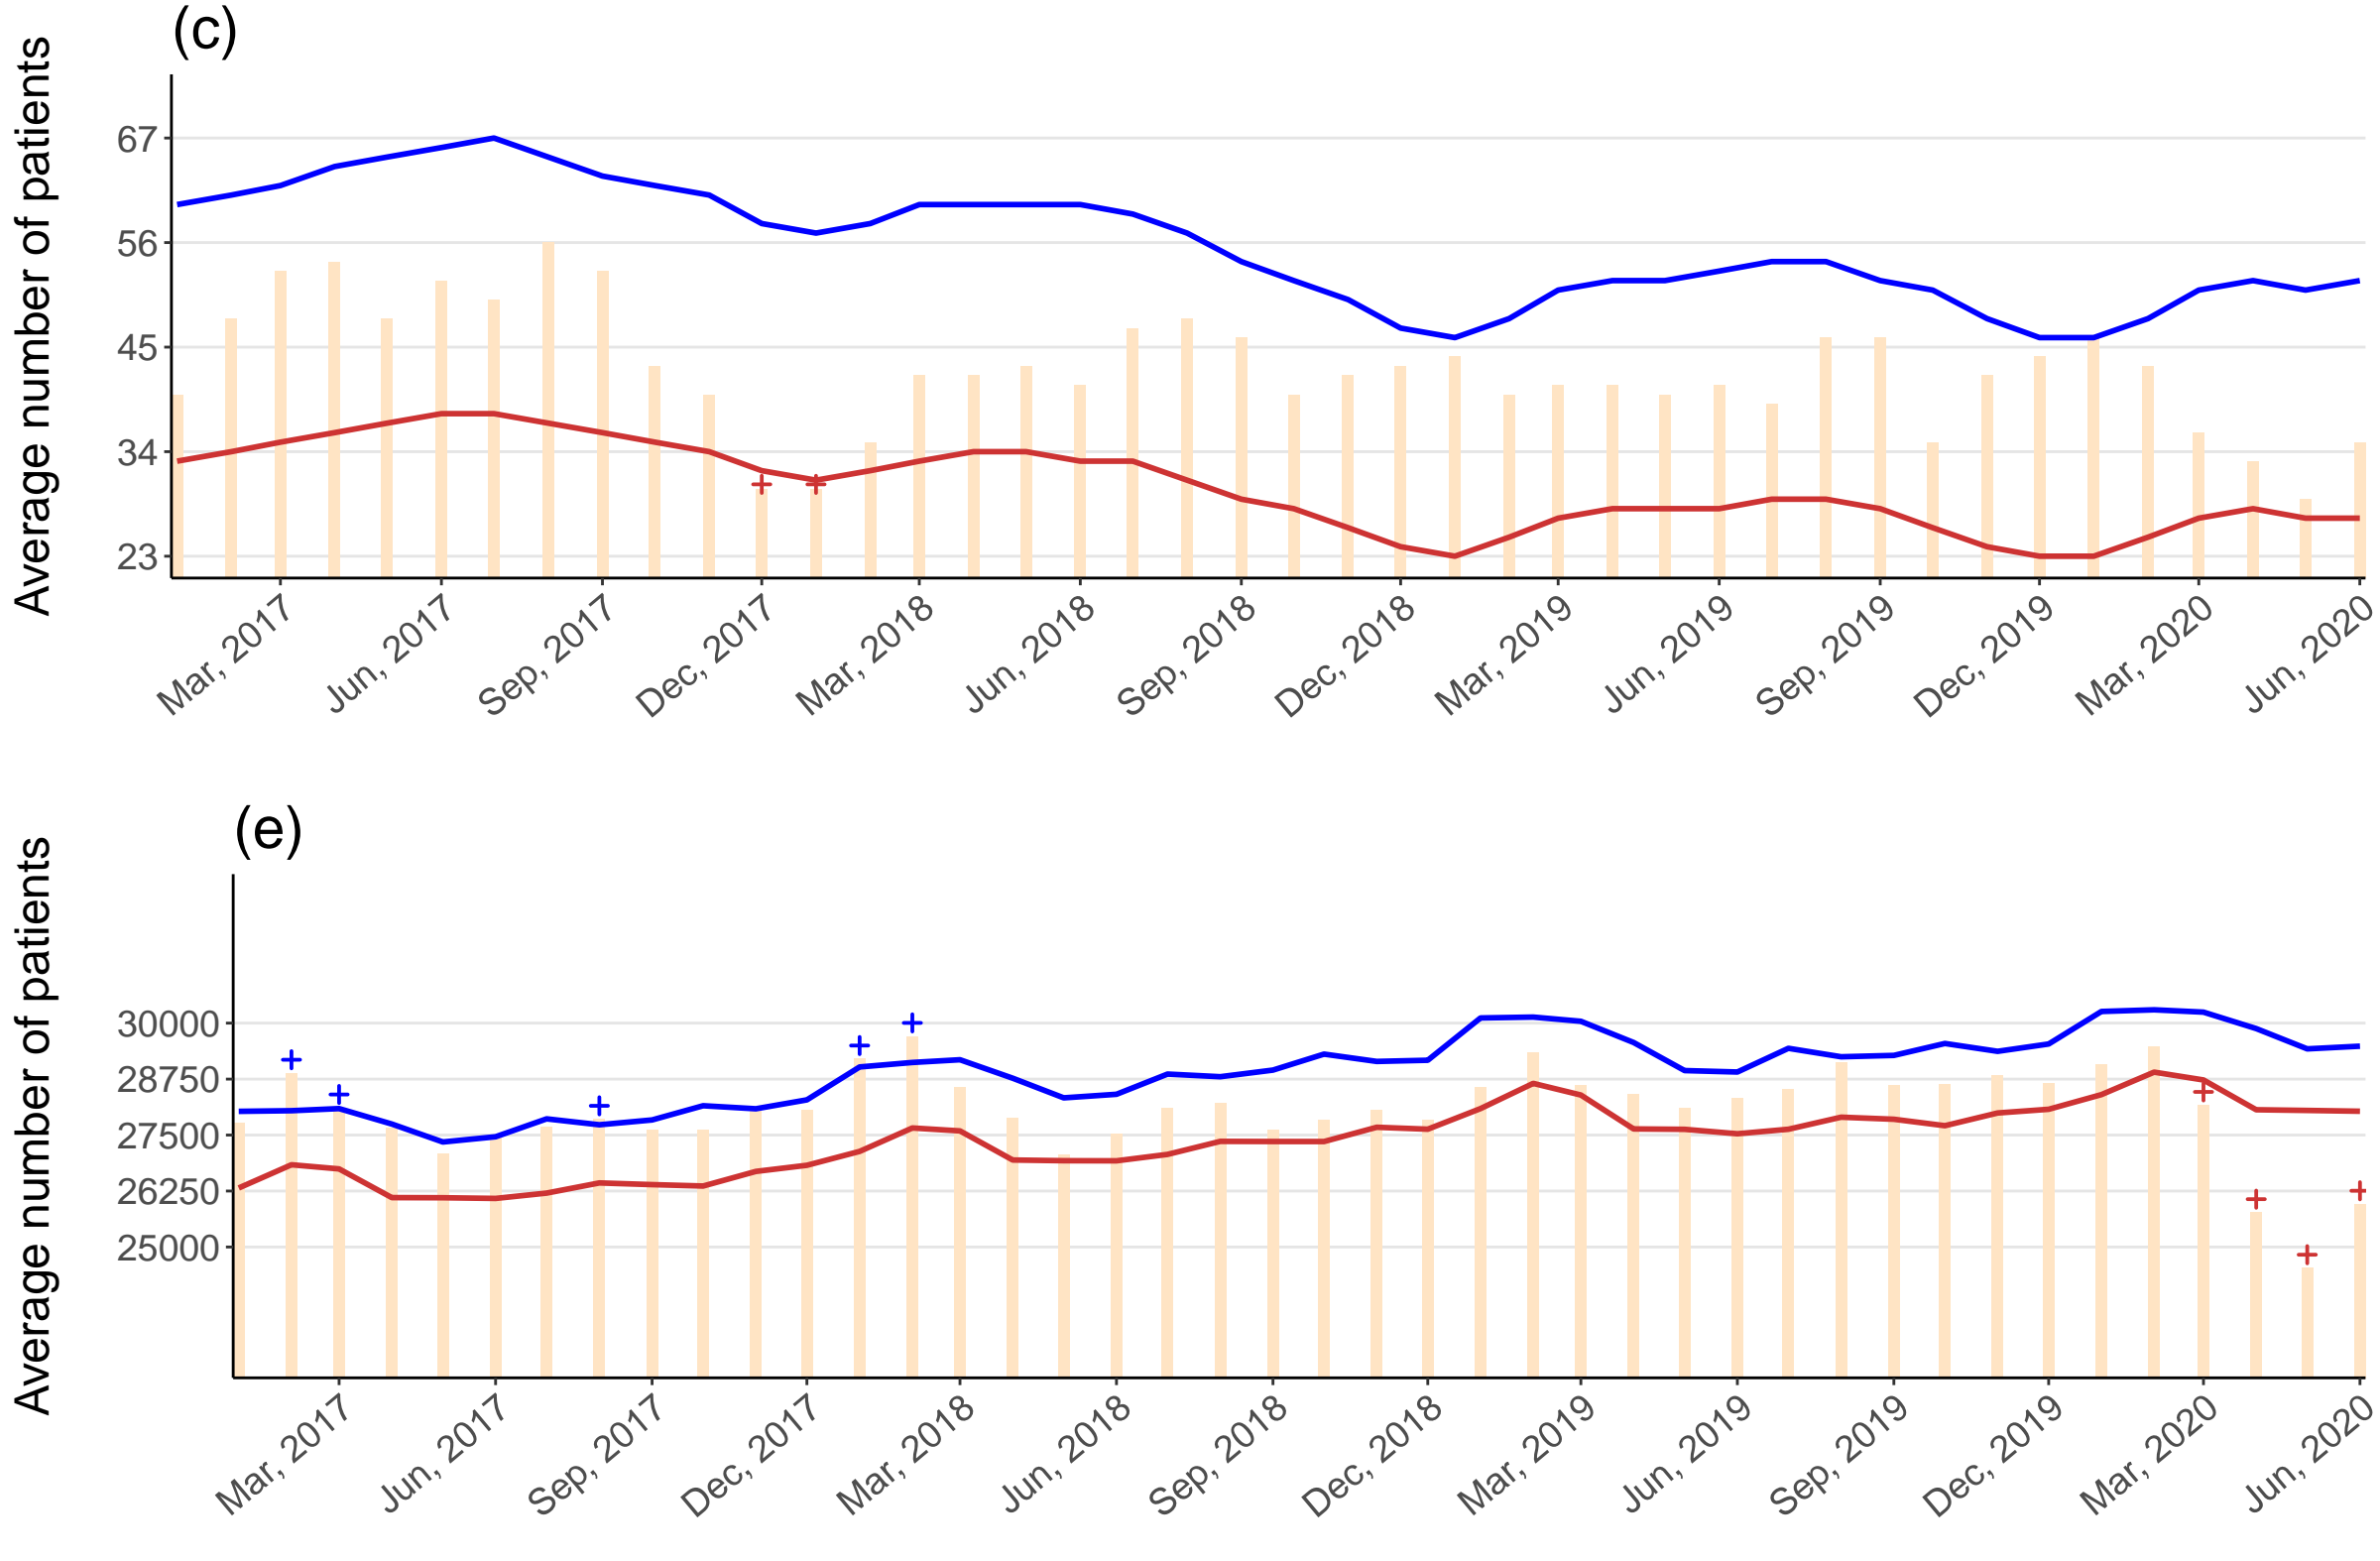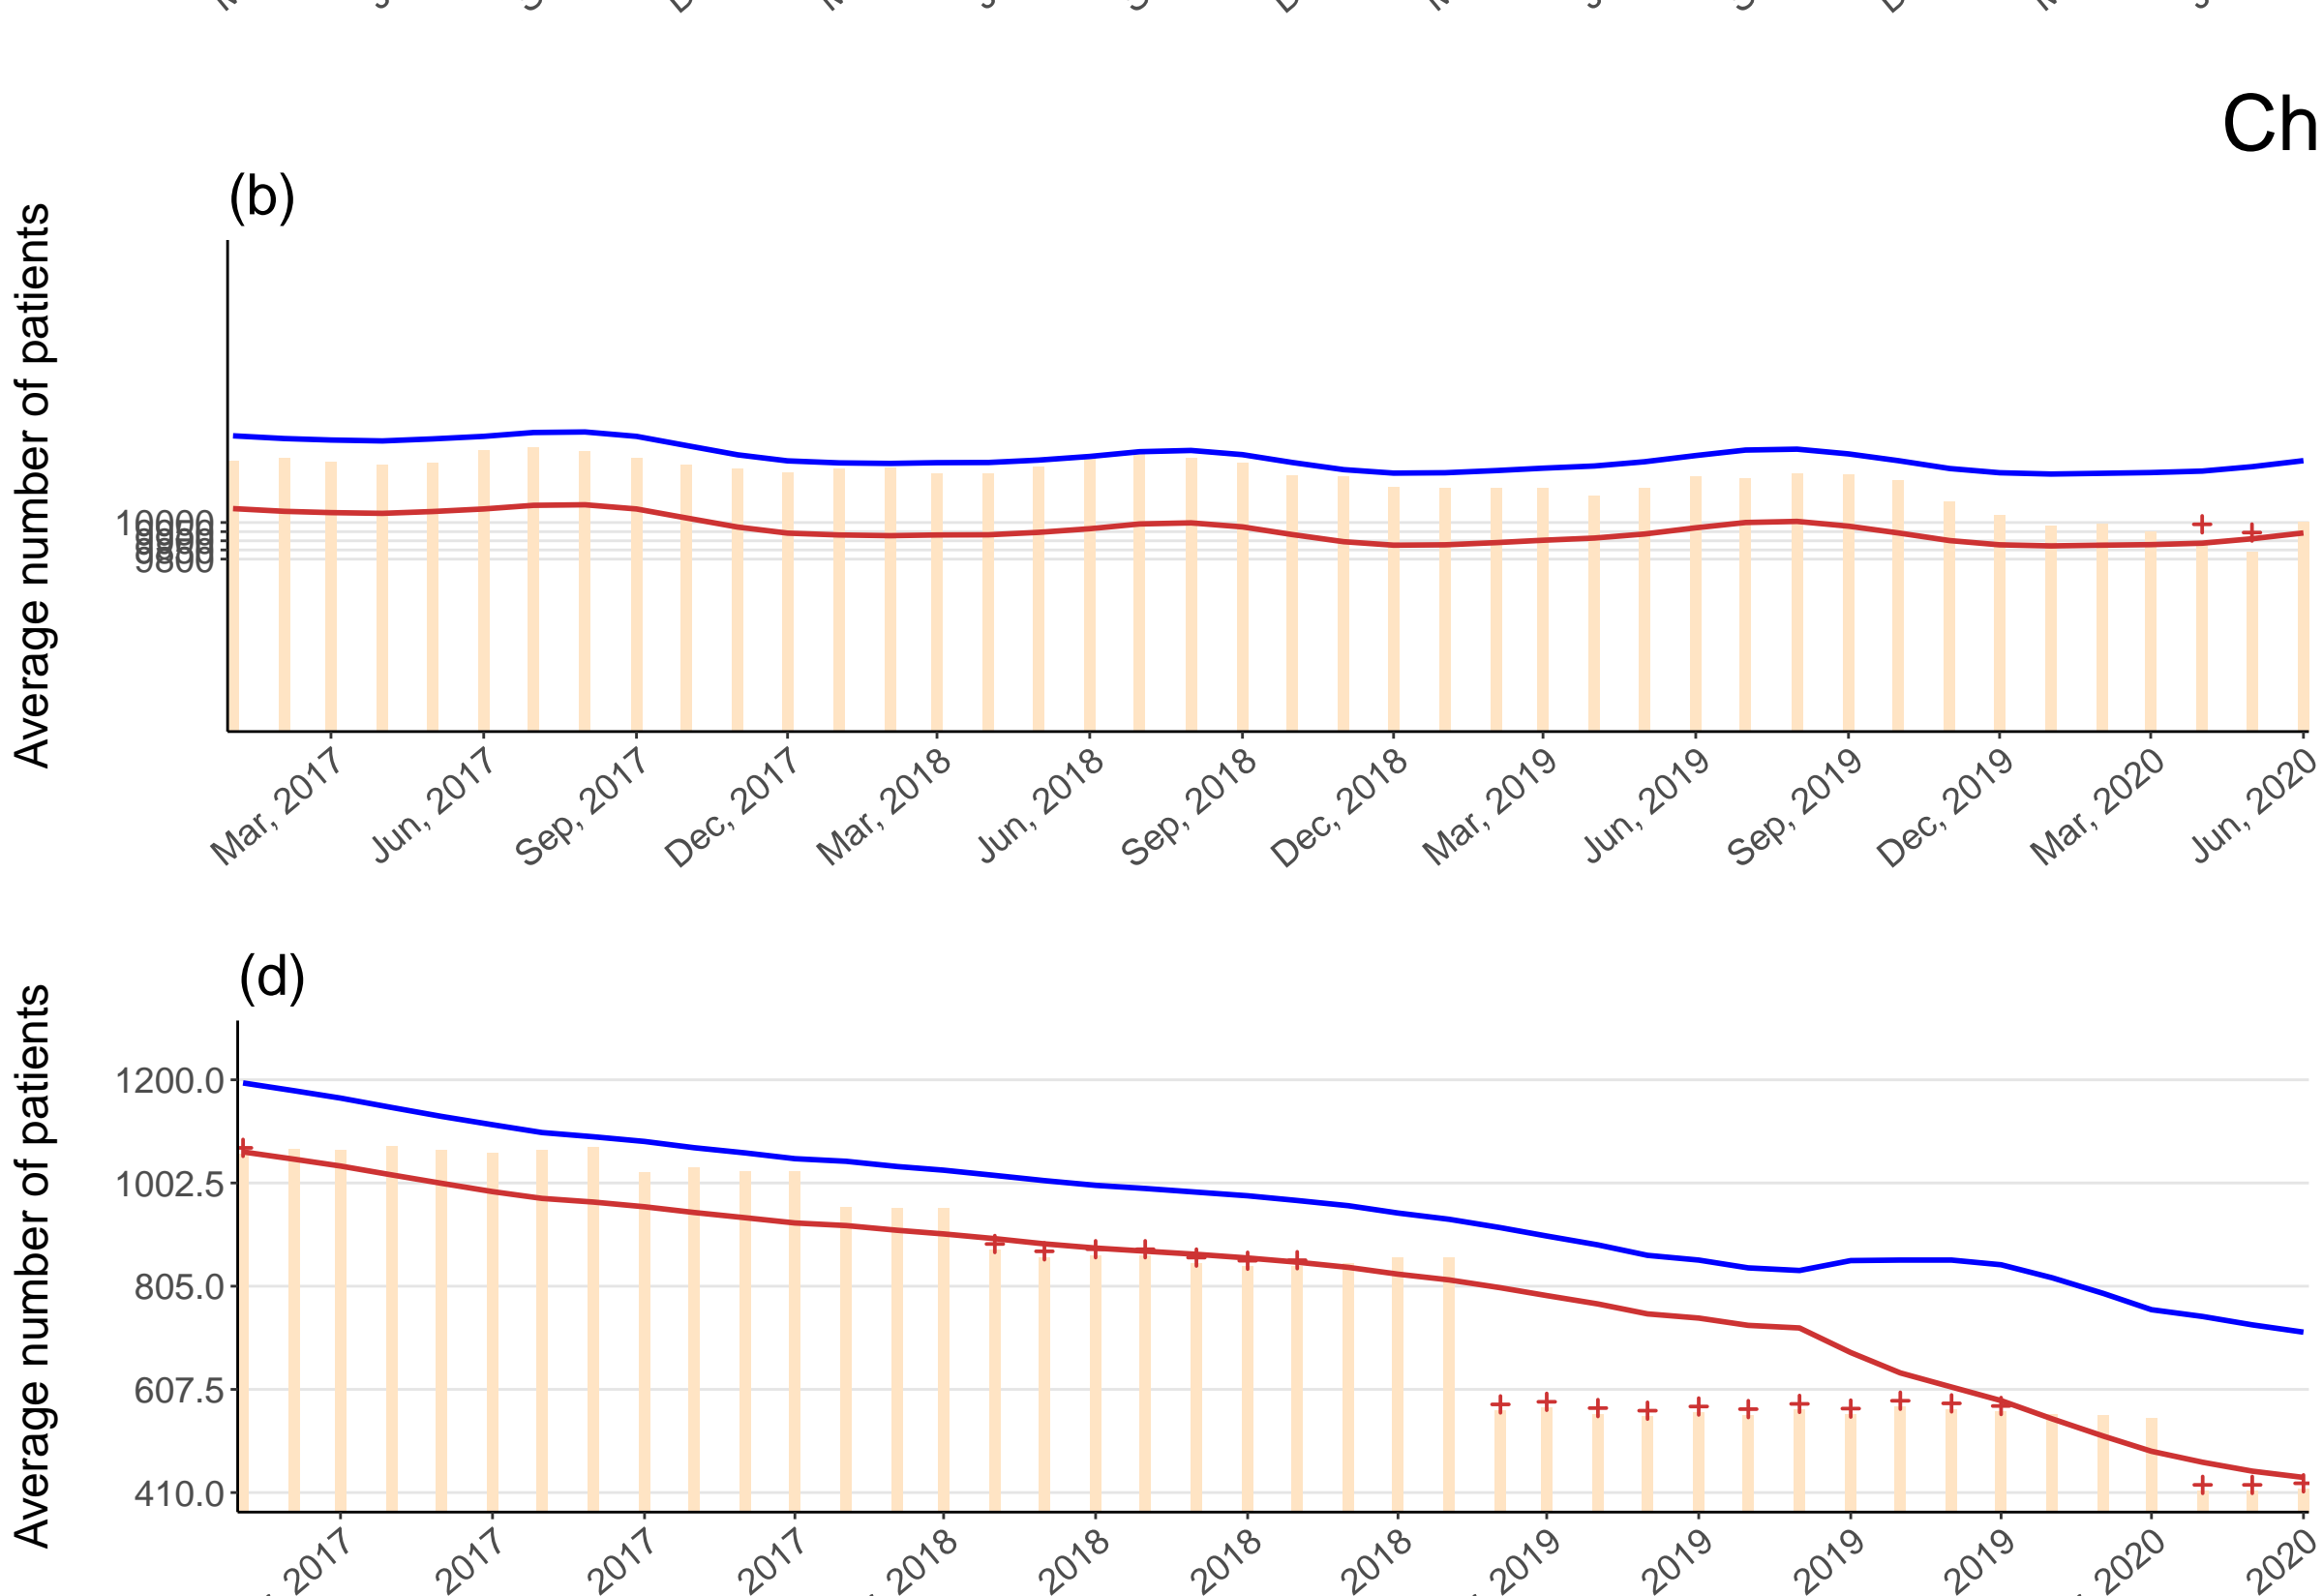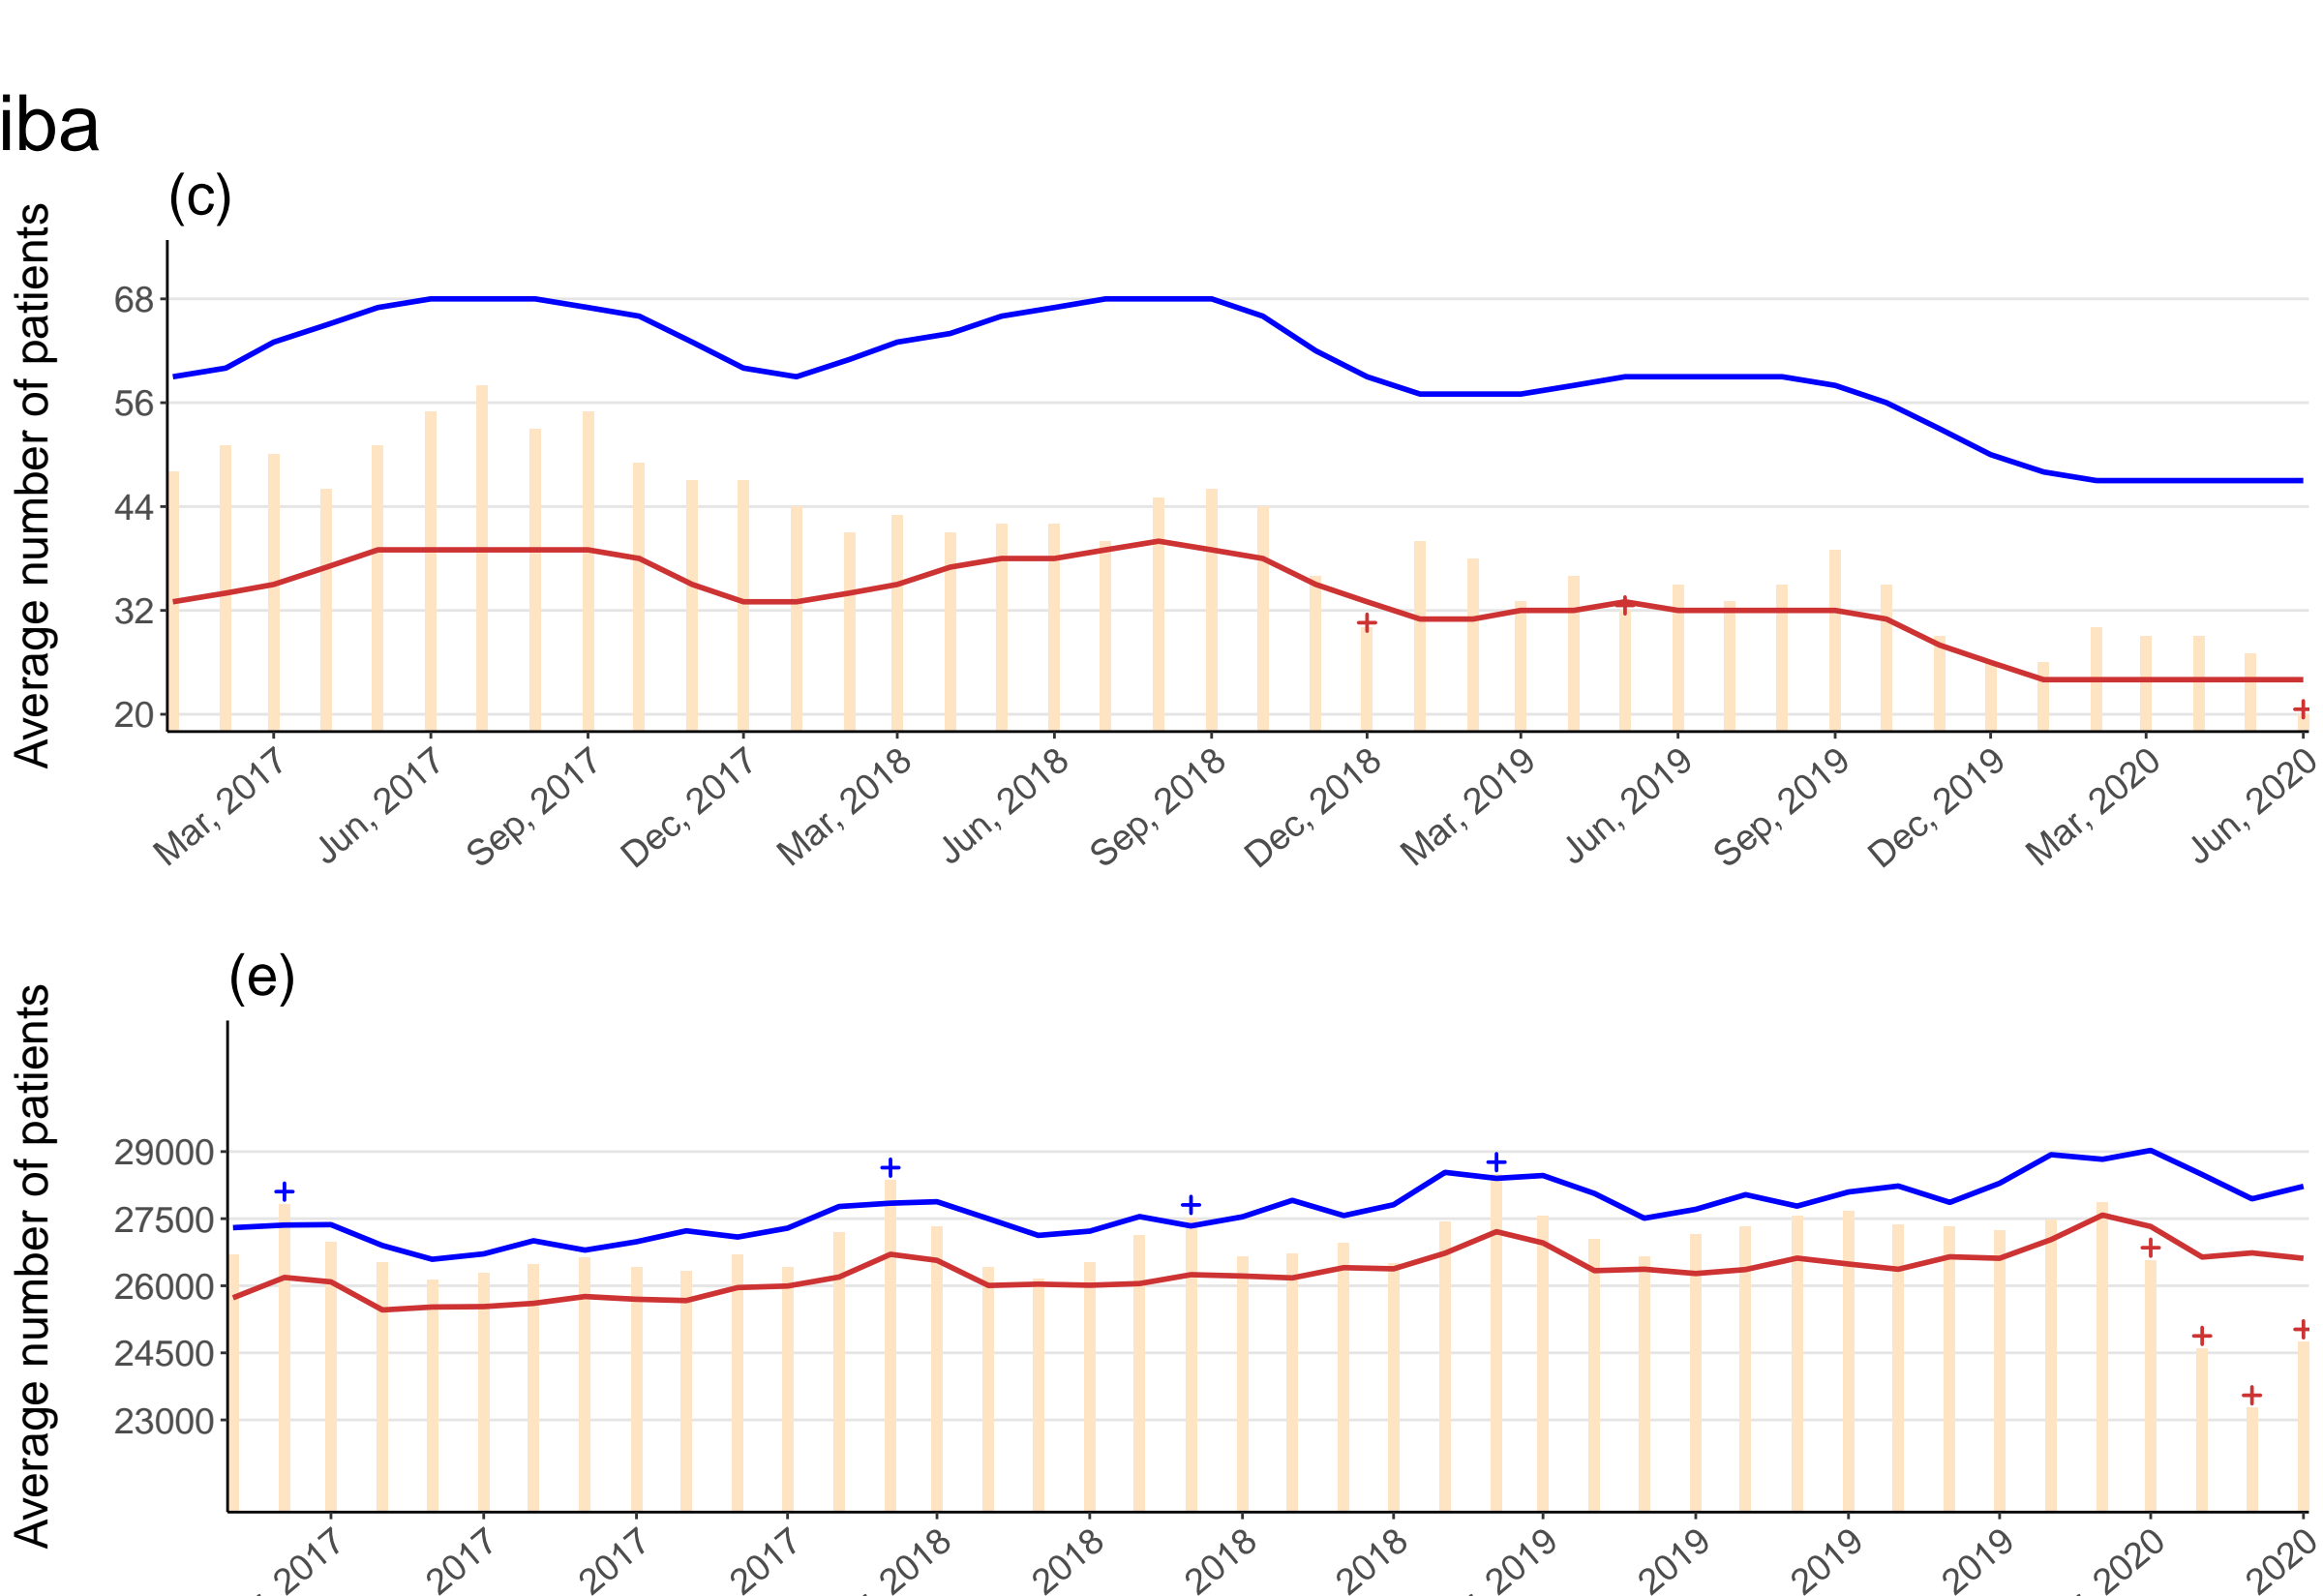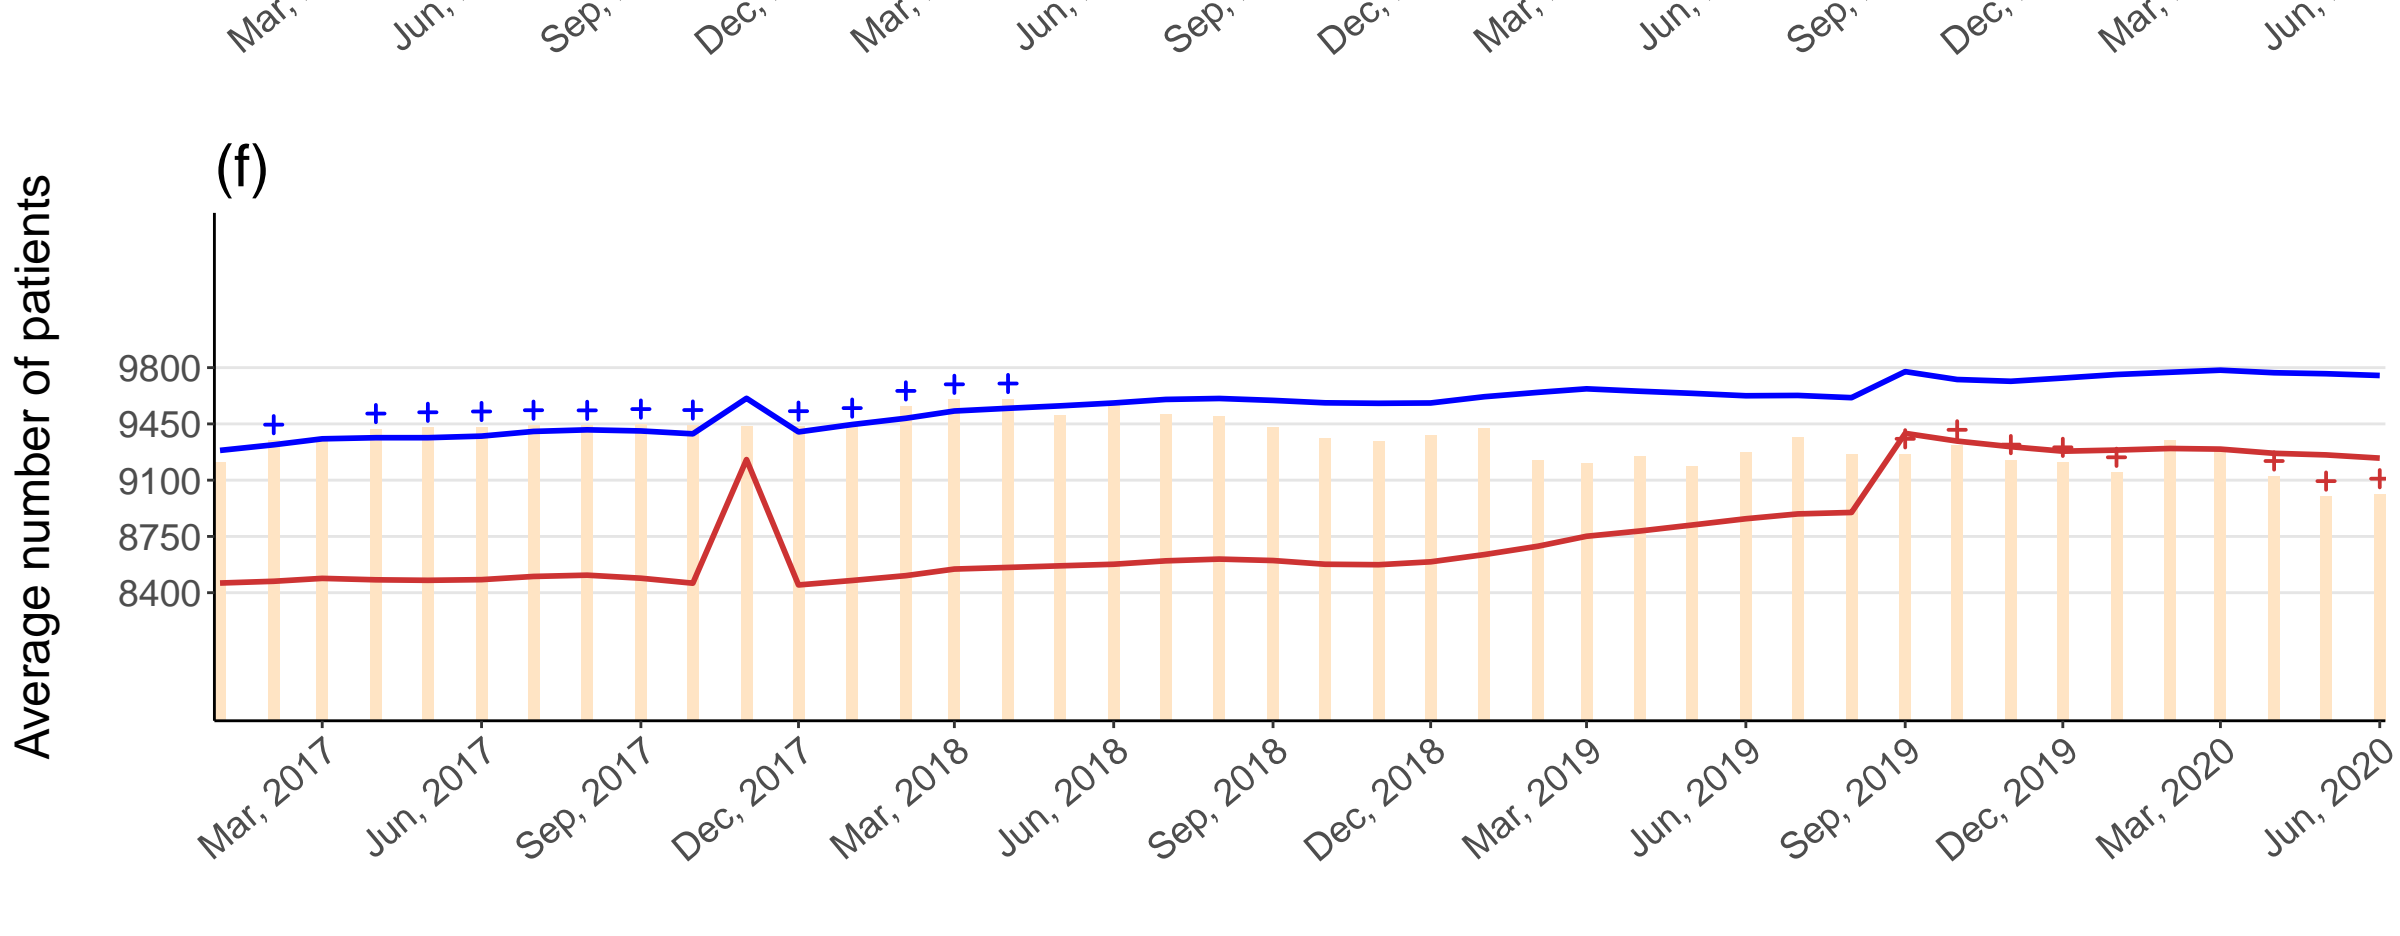

Chiba

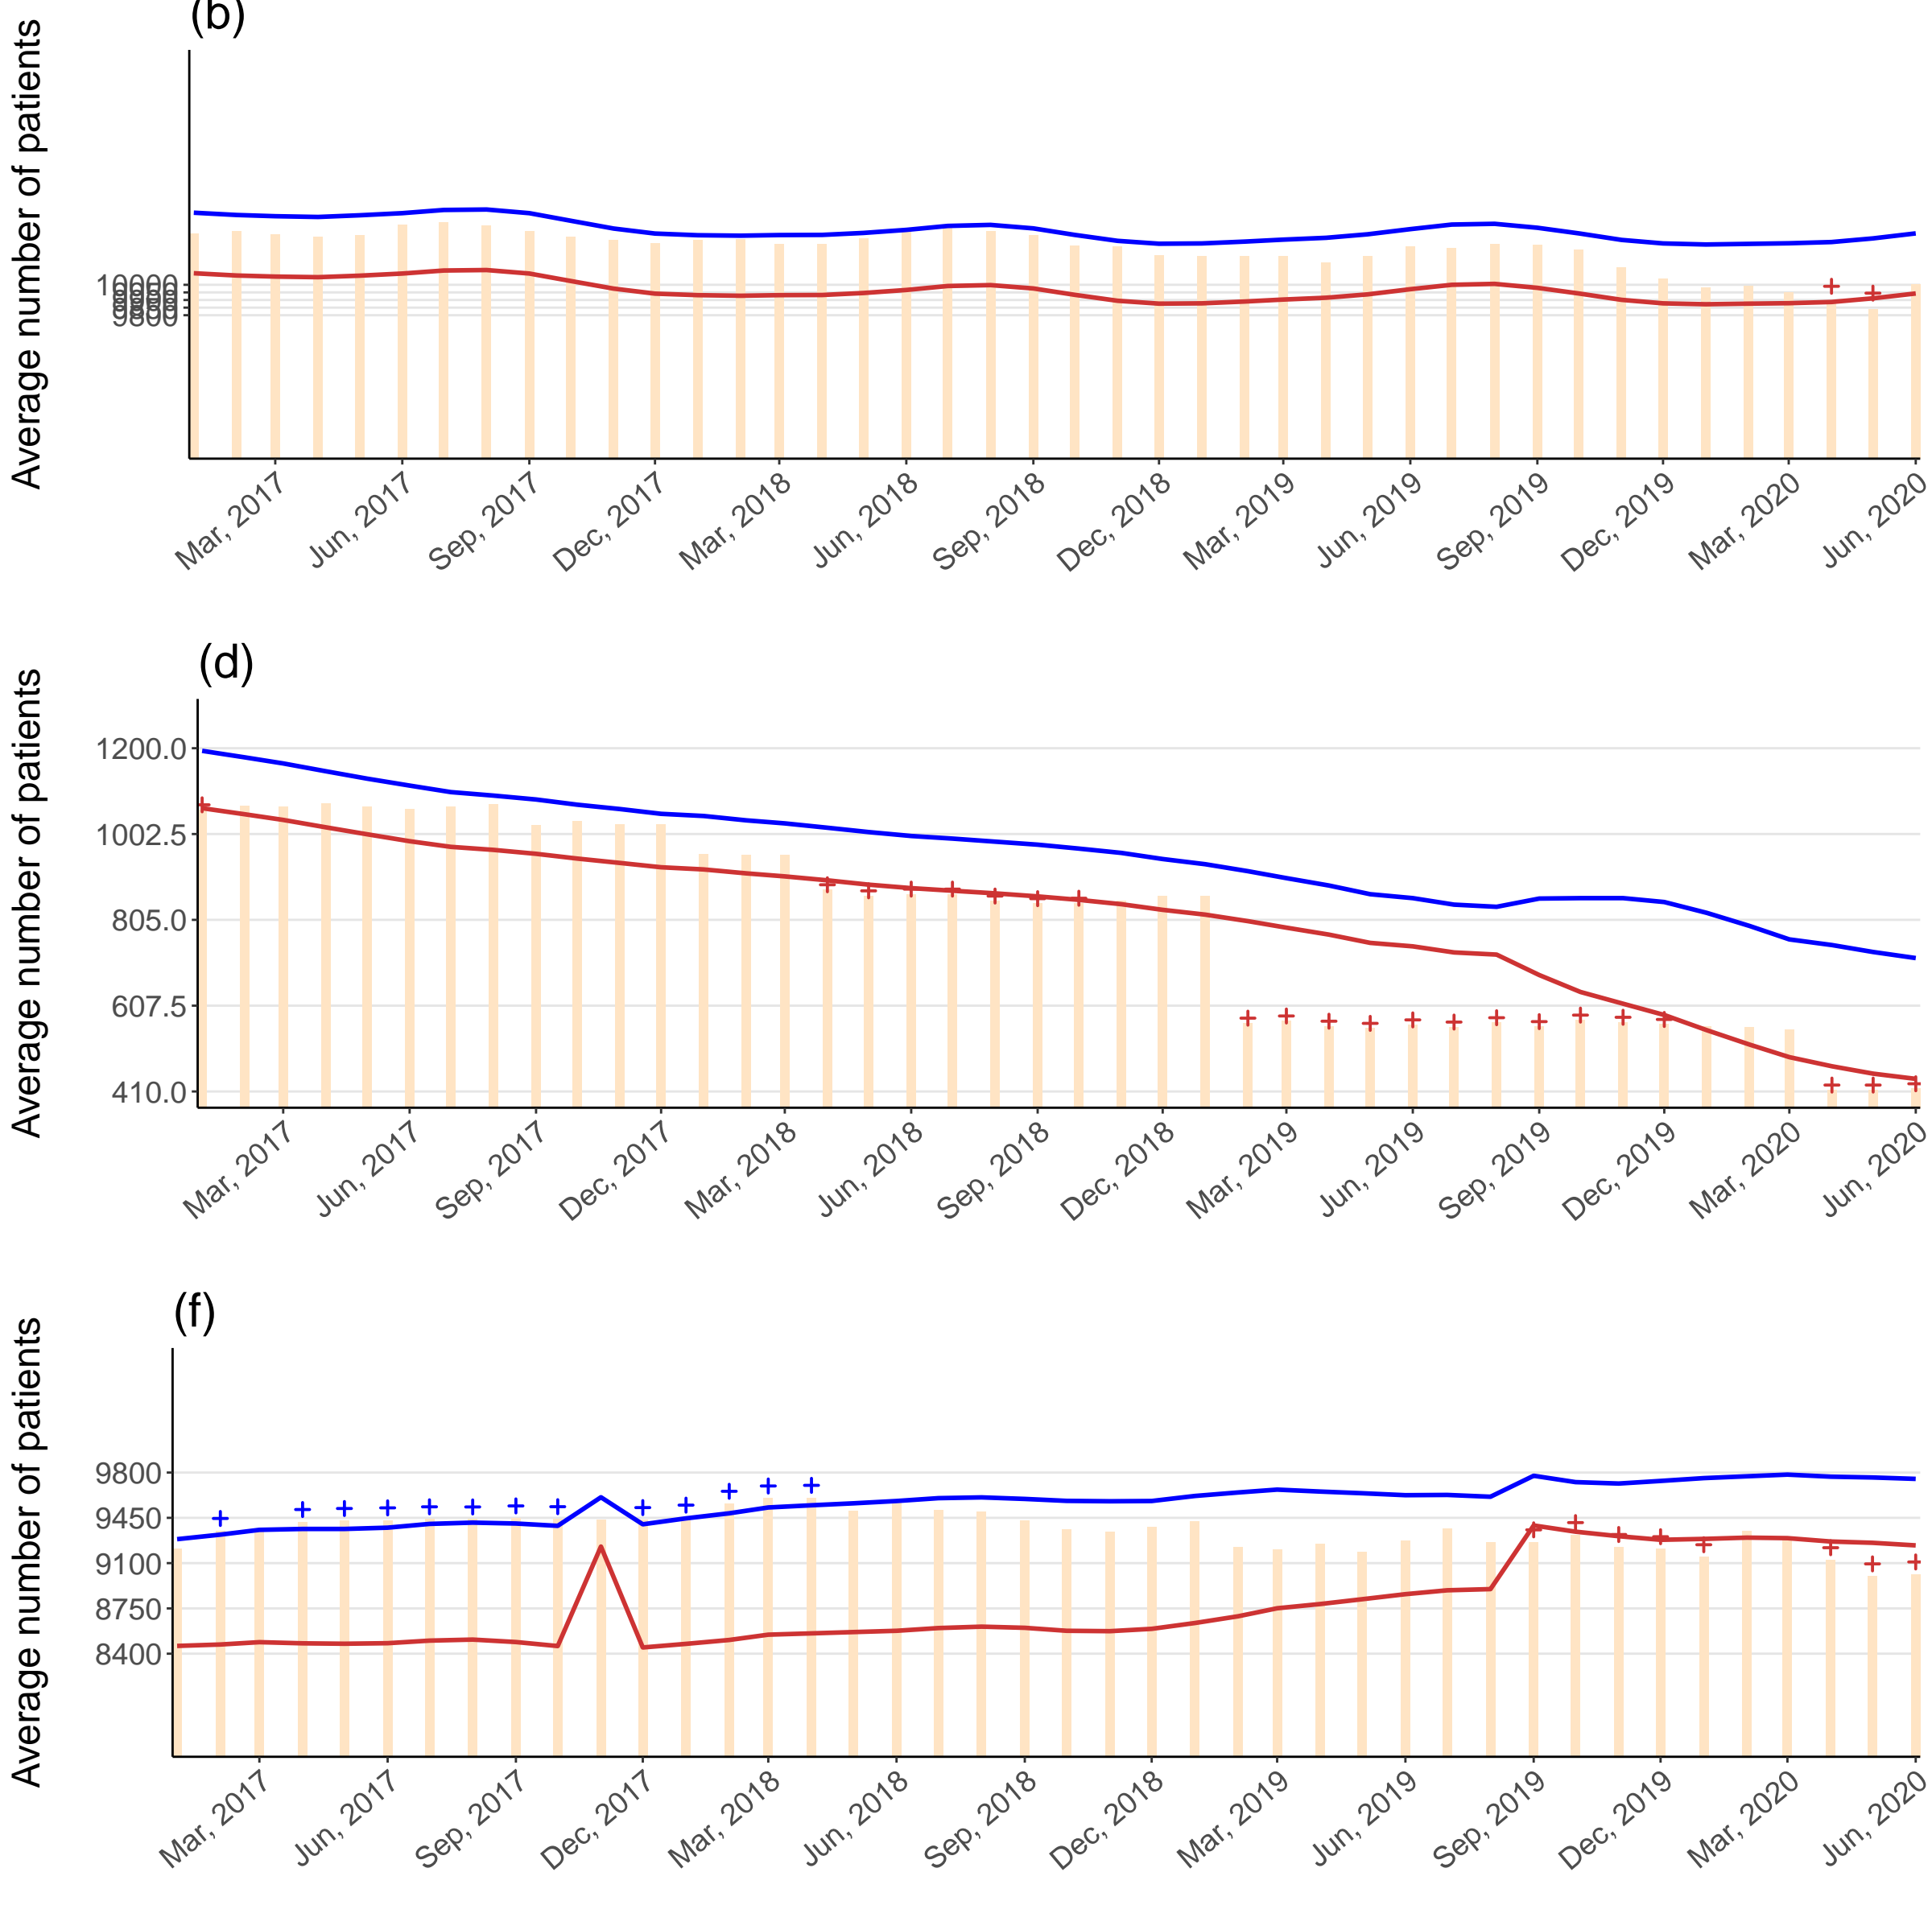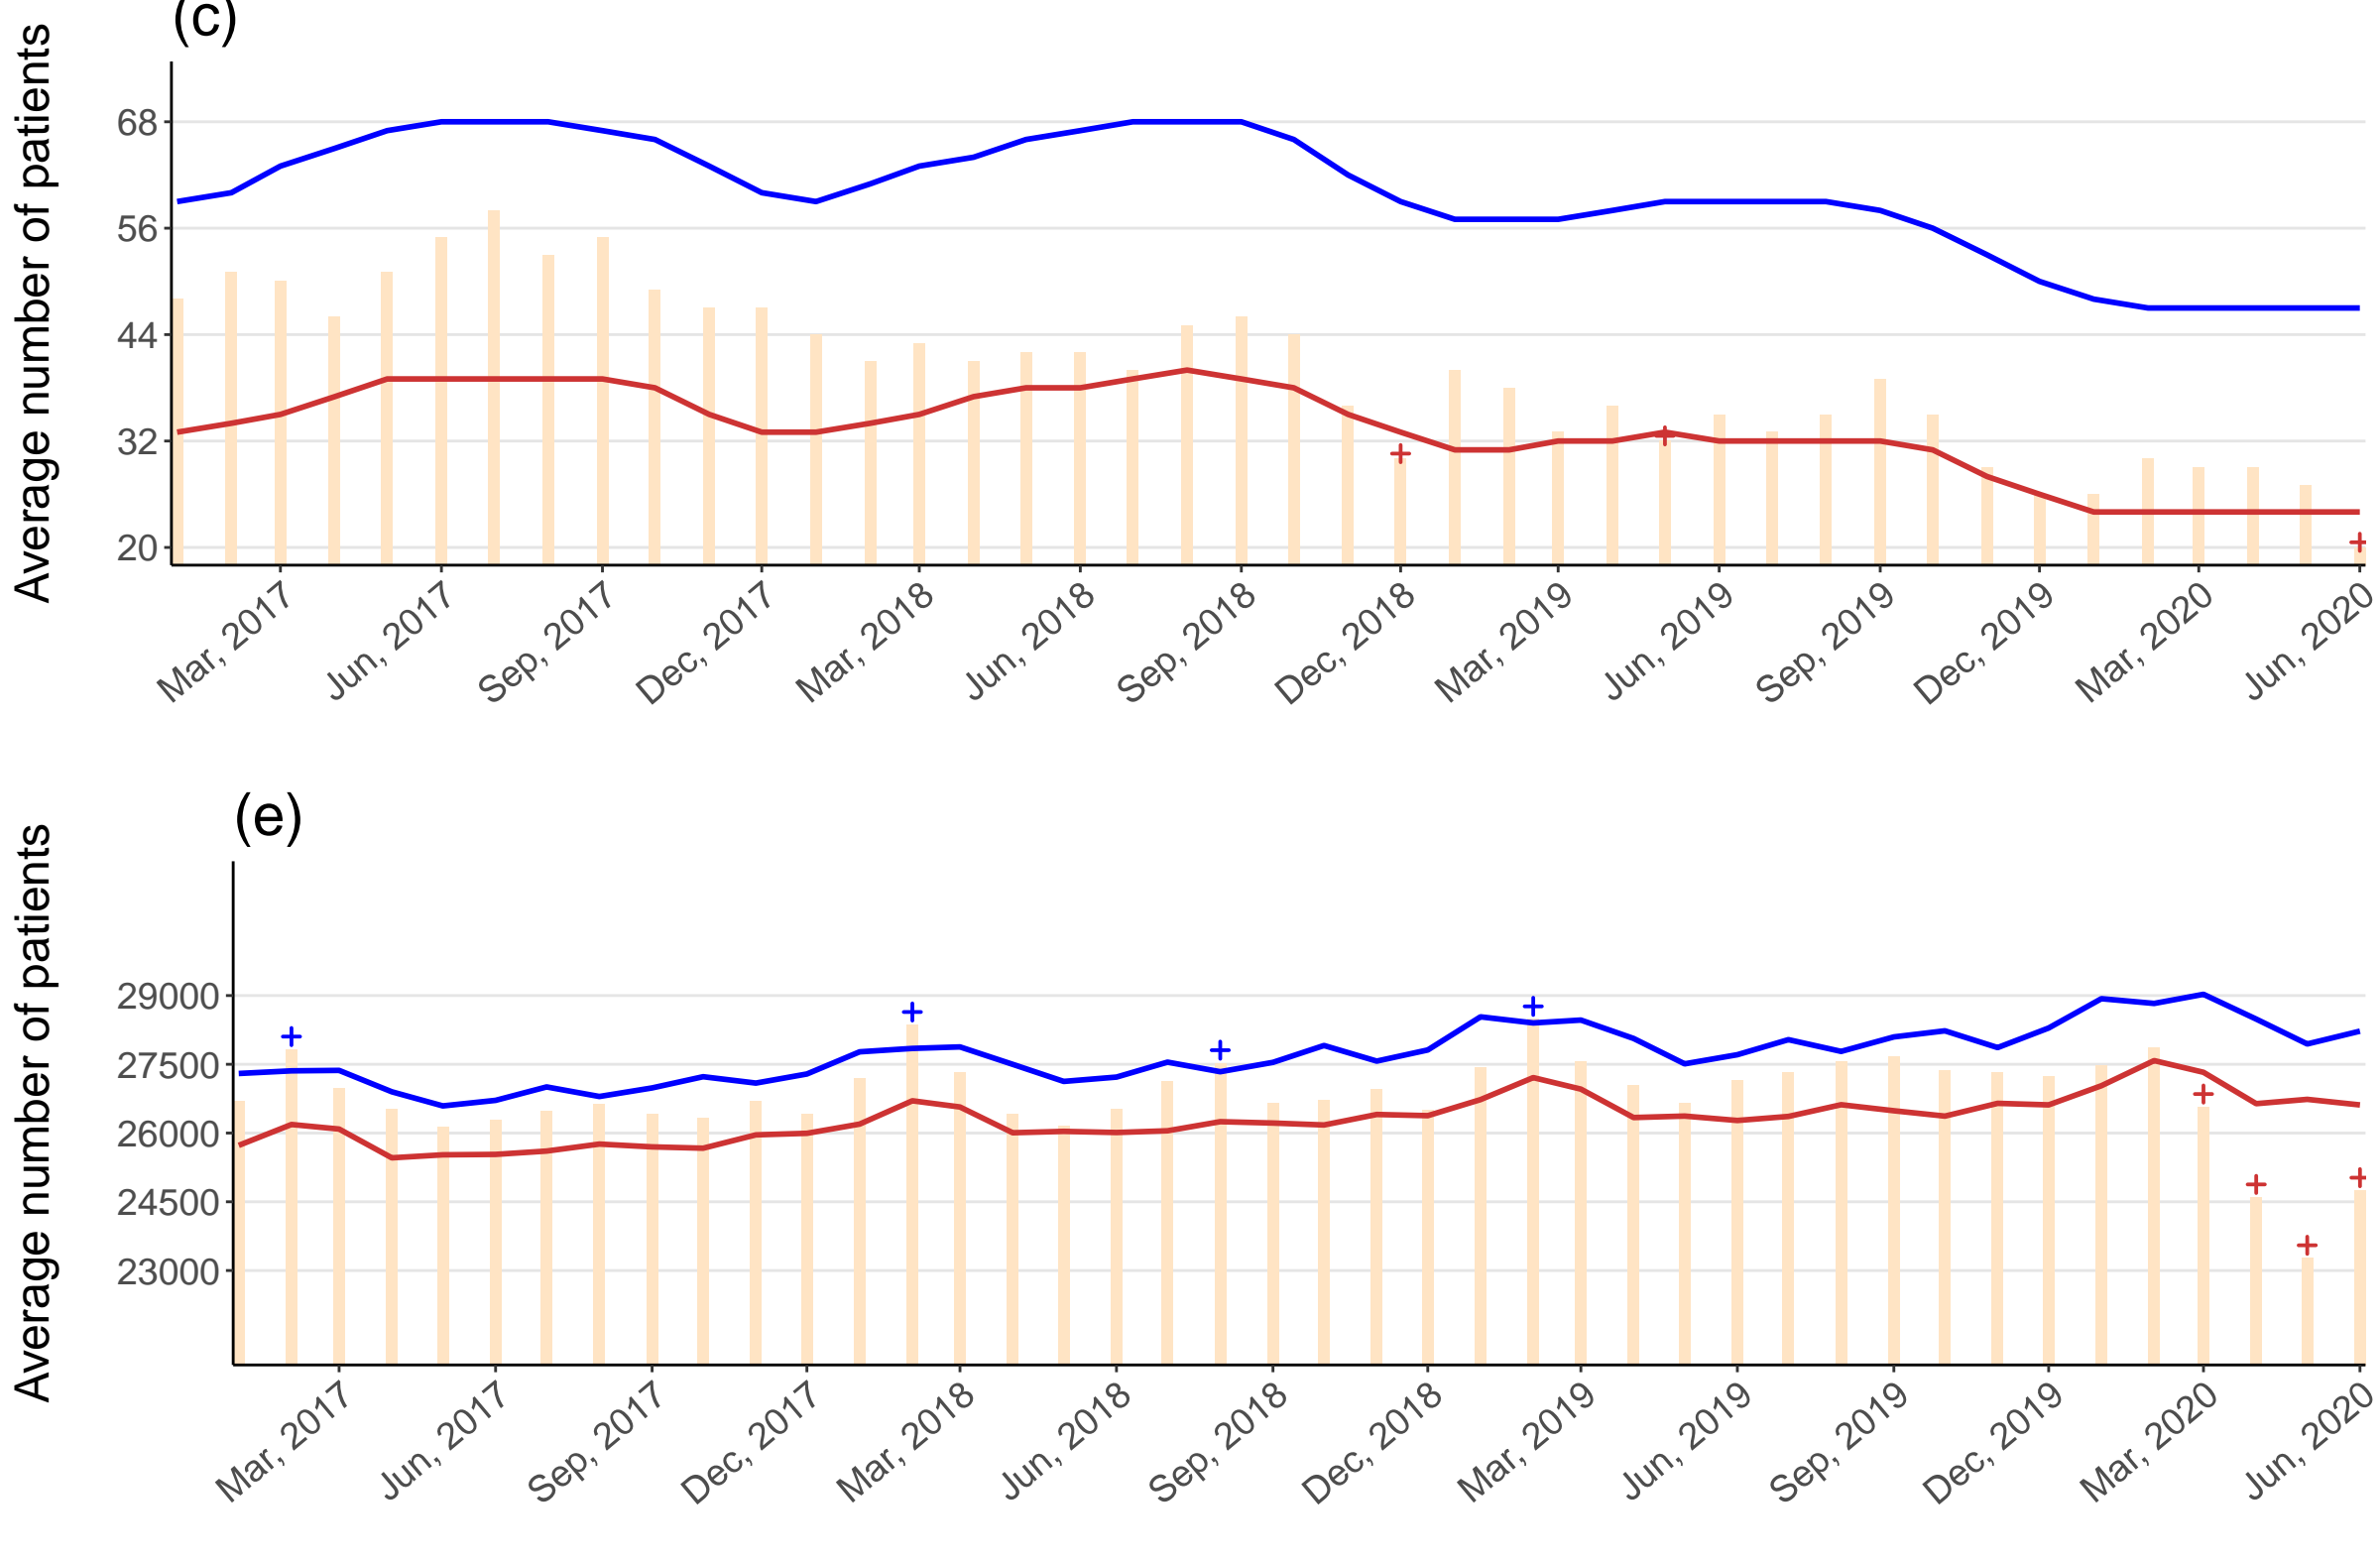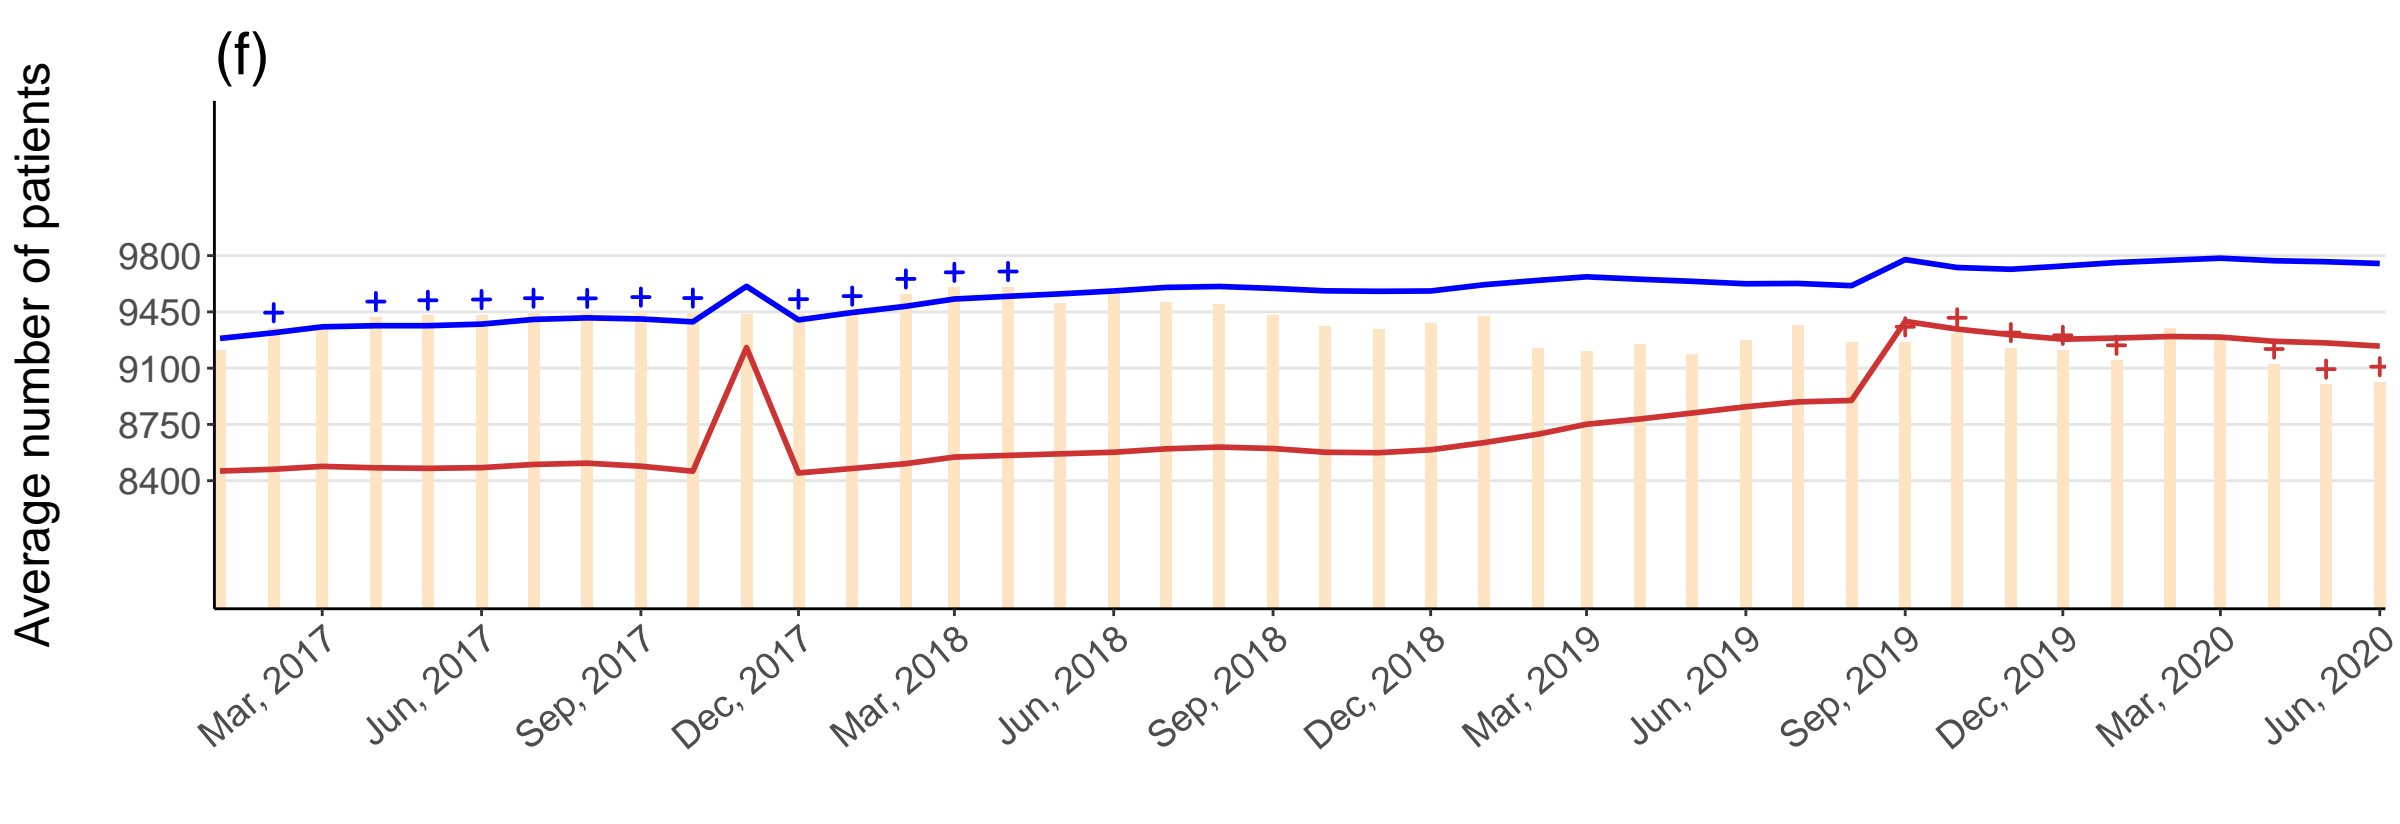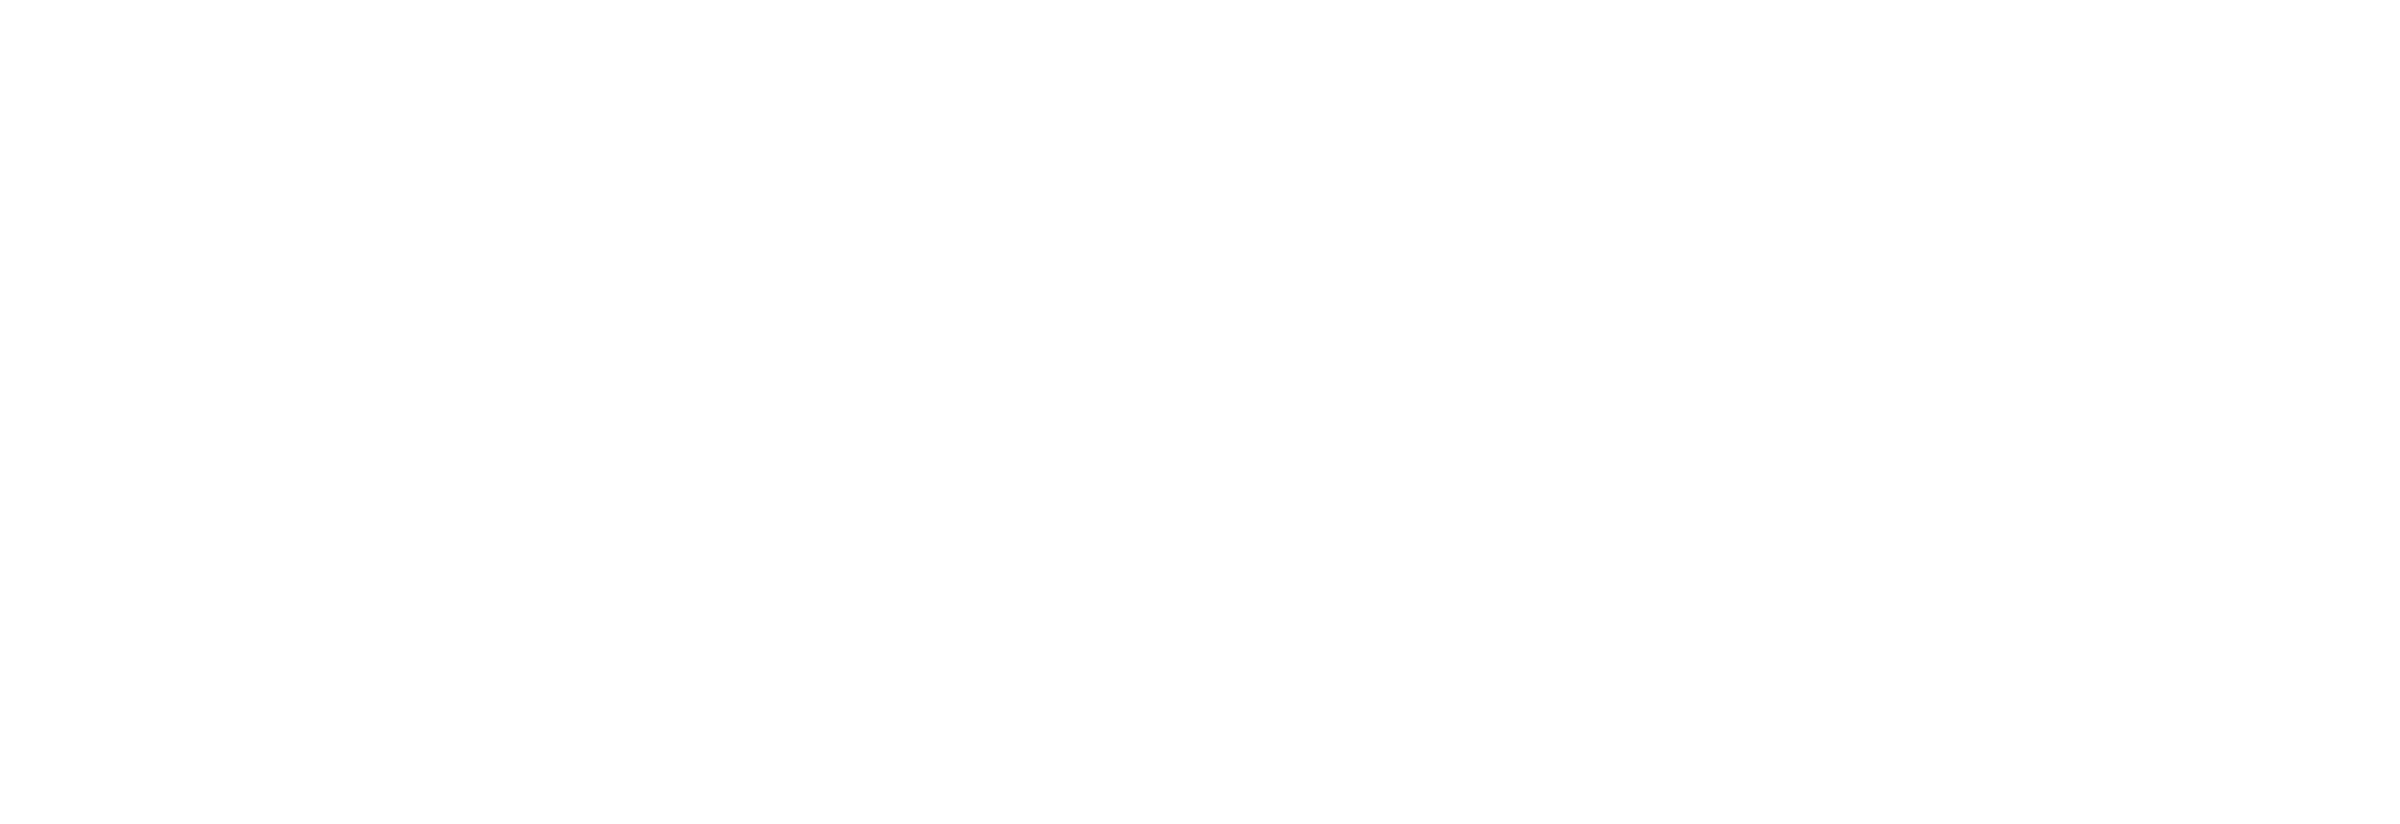



Tokyo

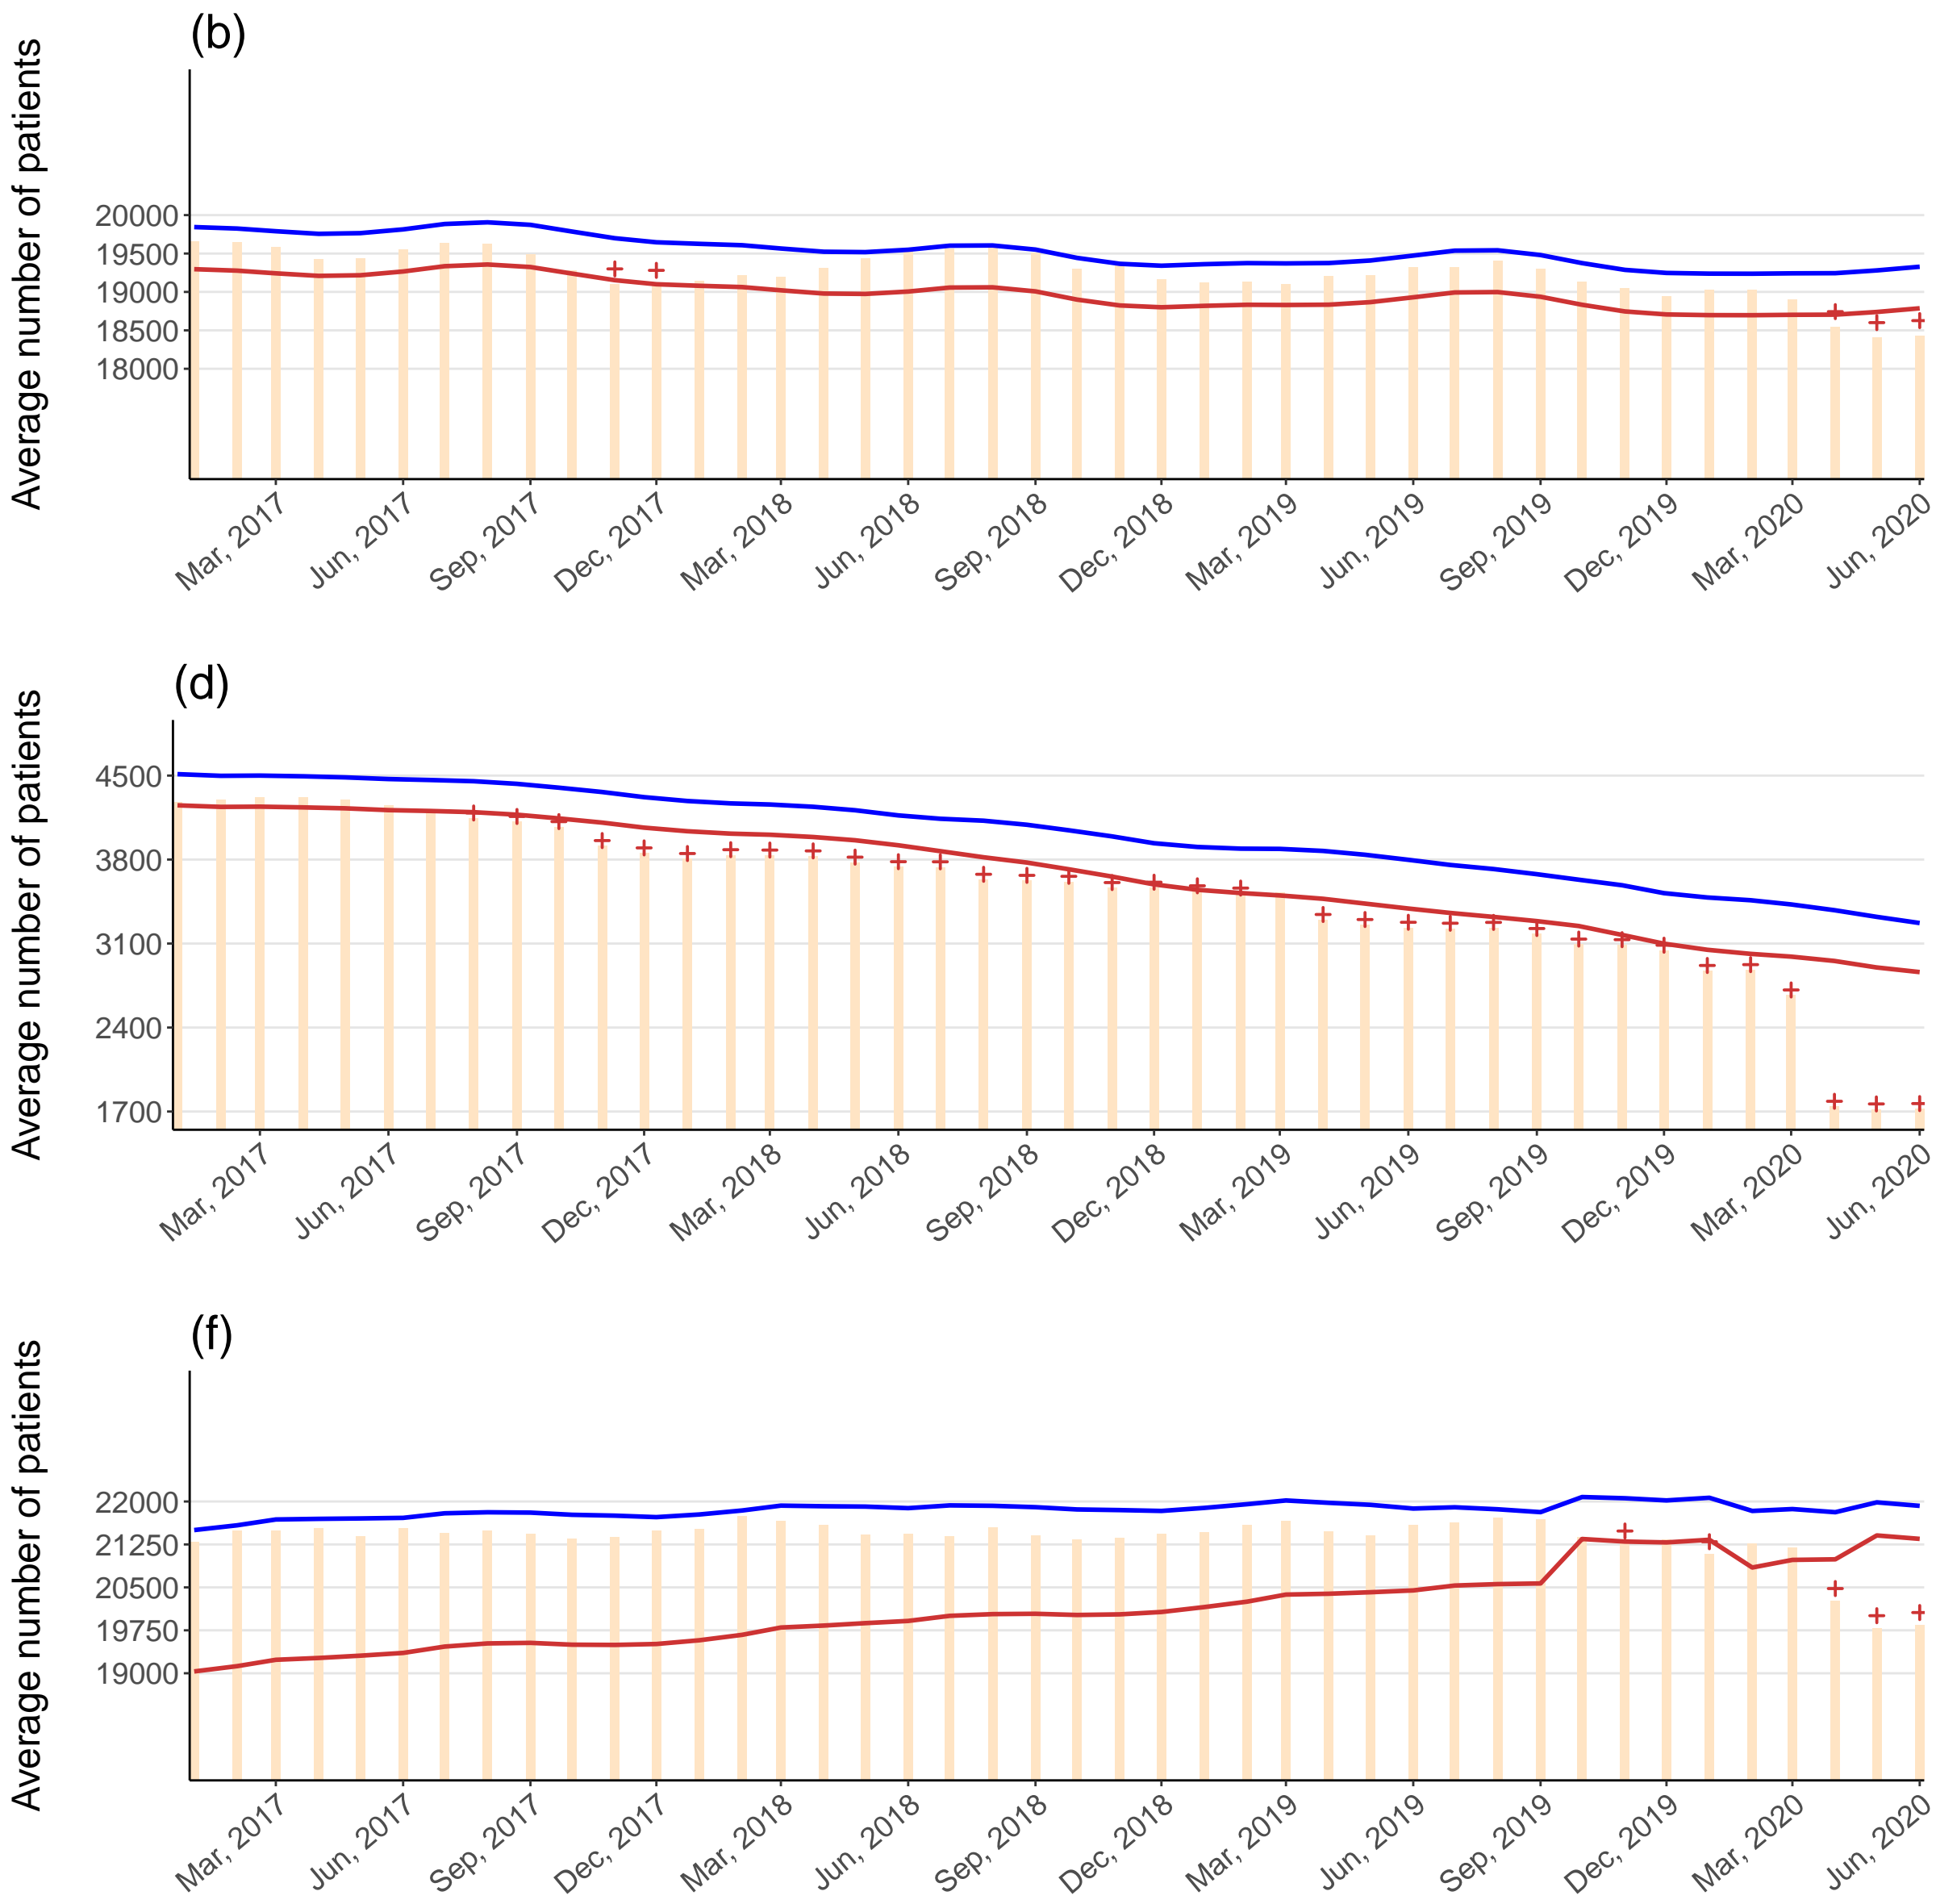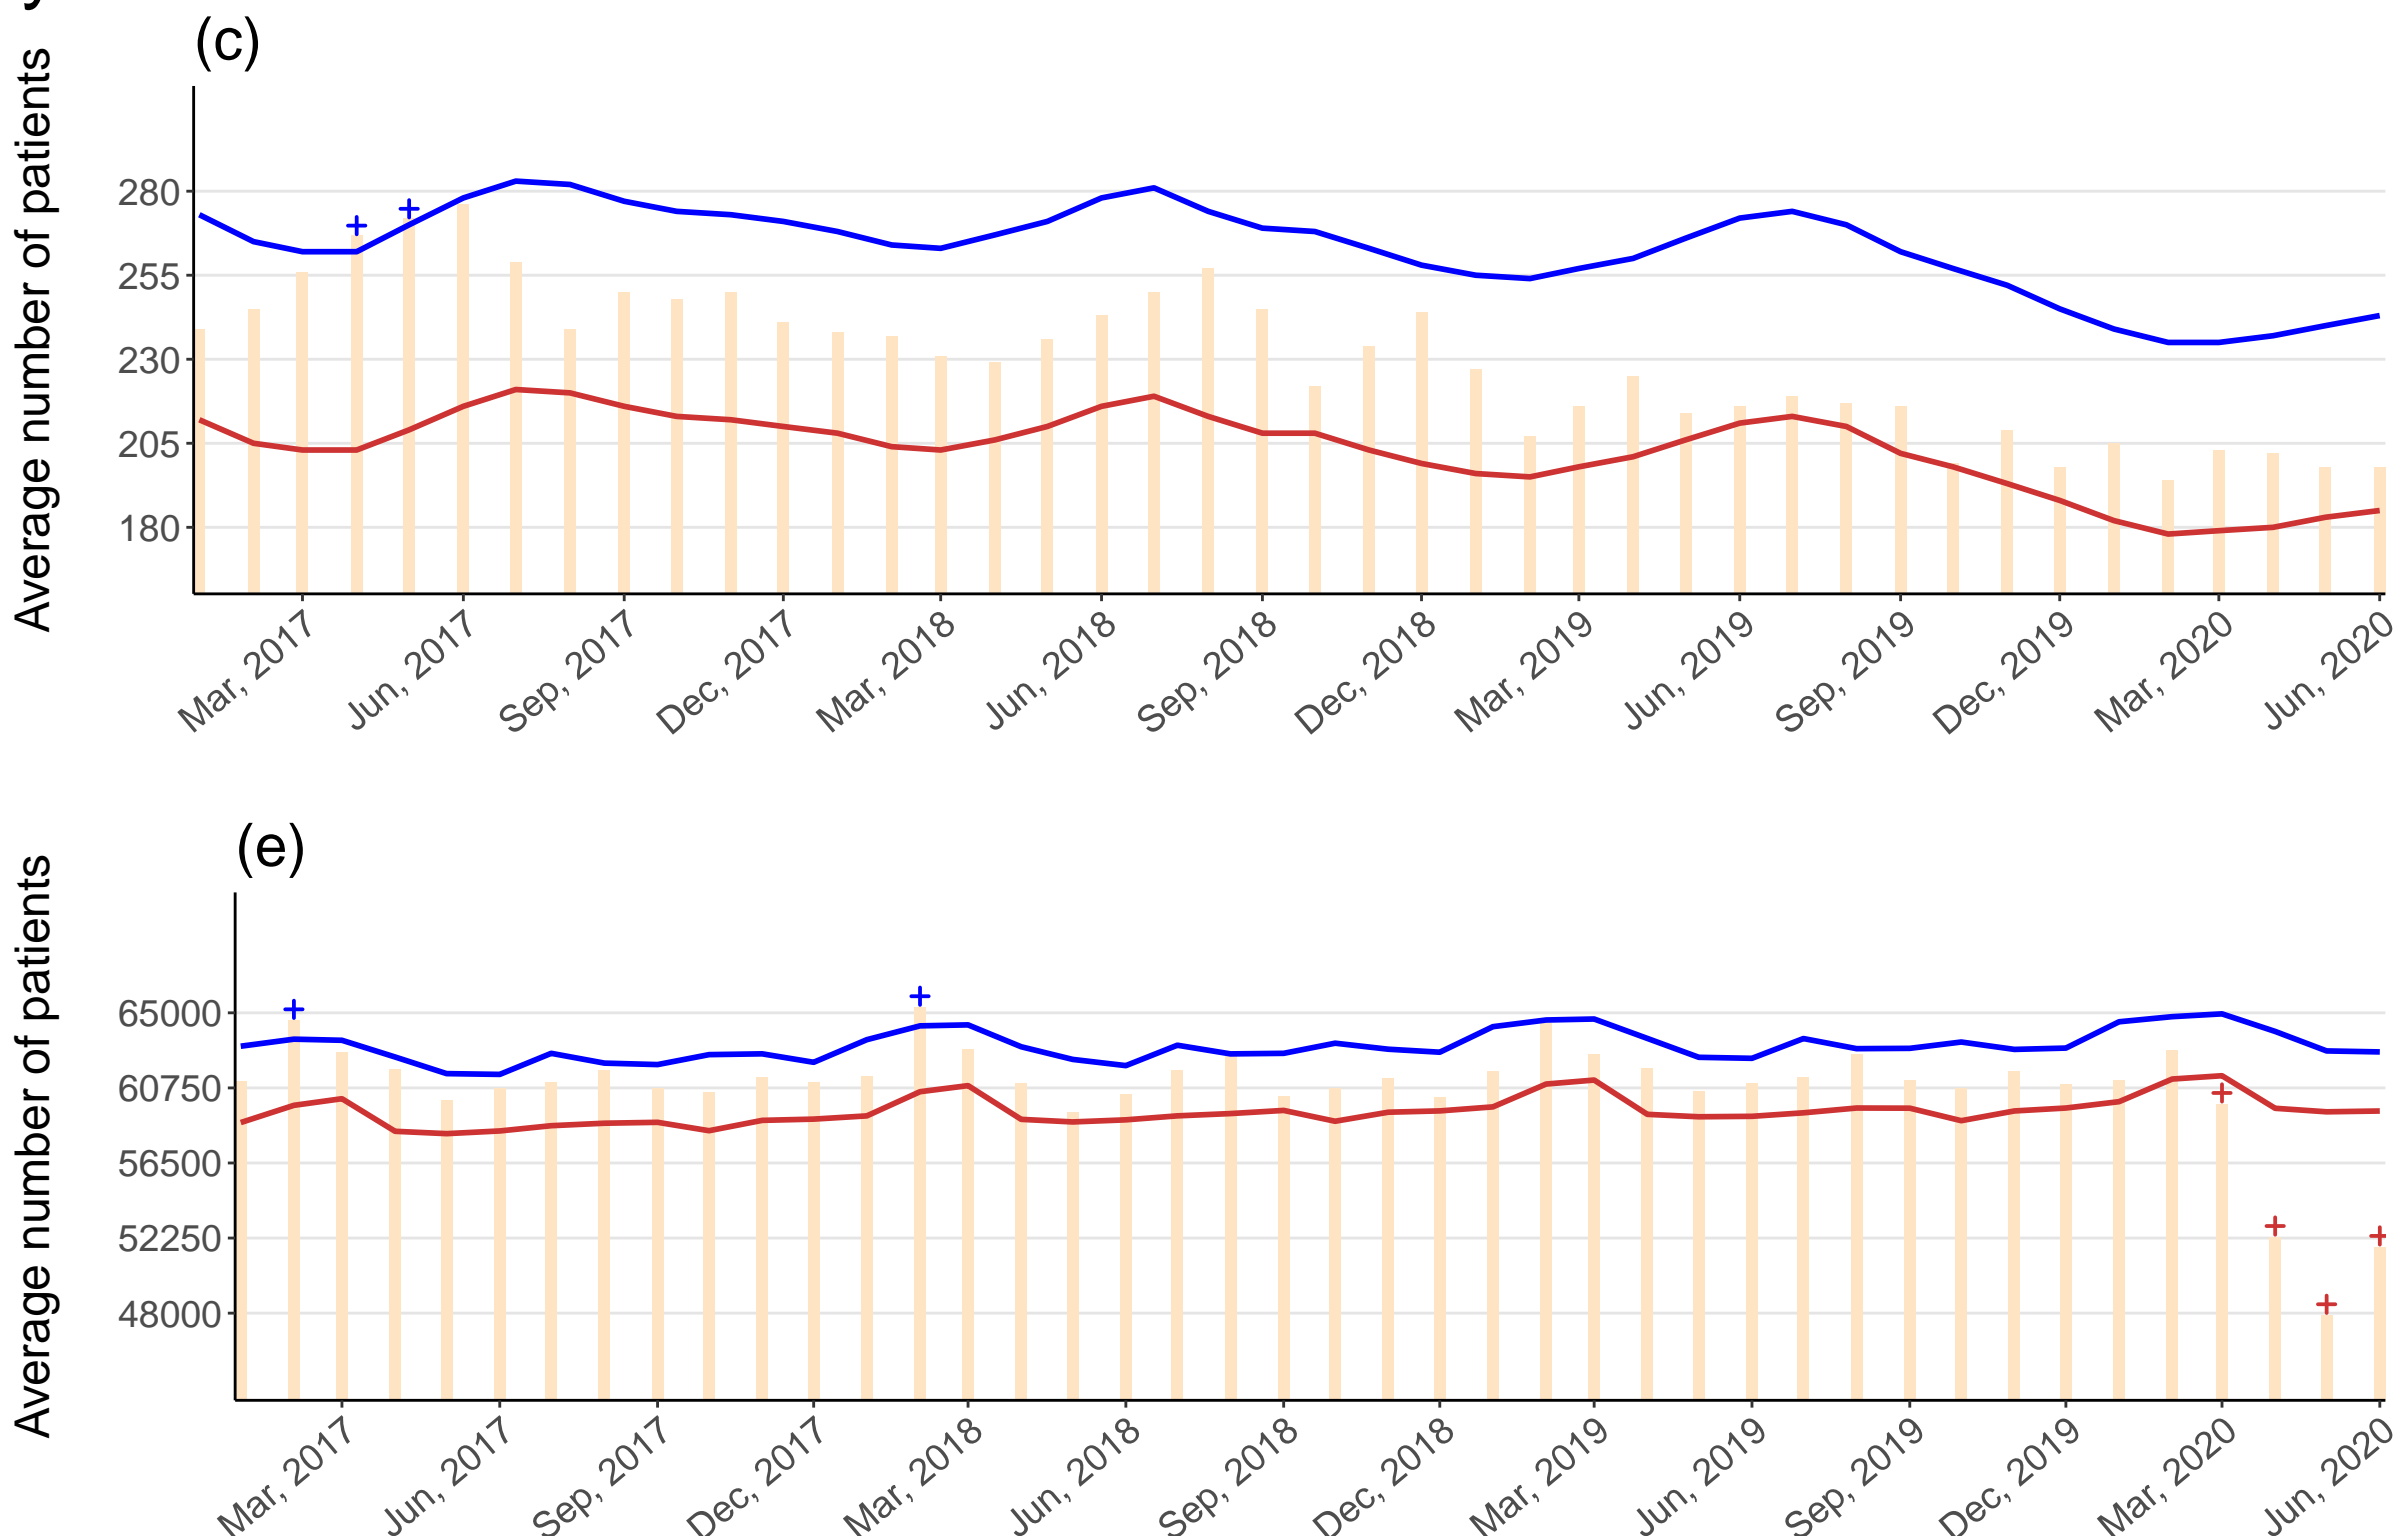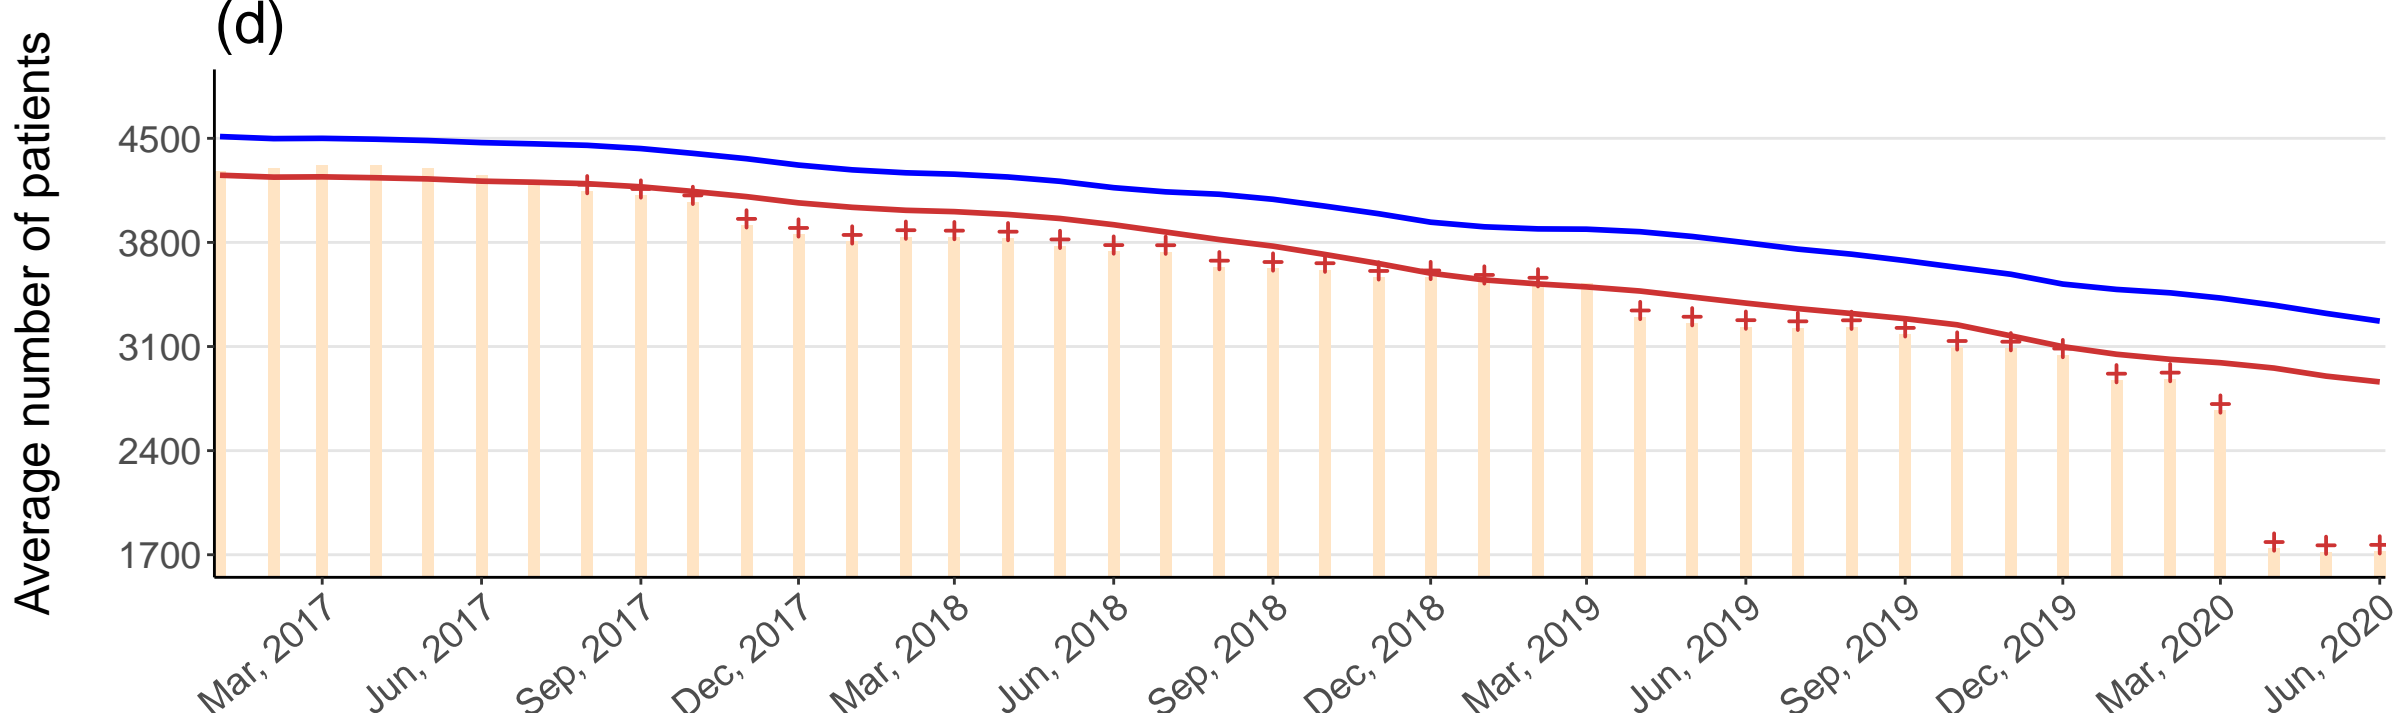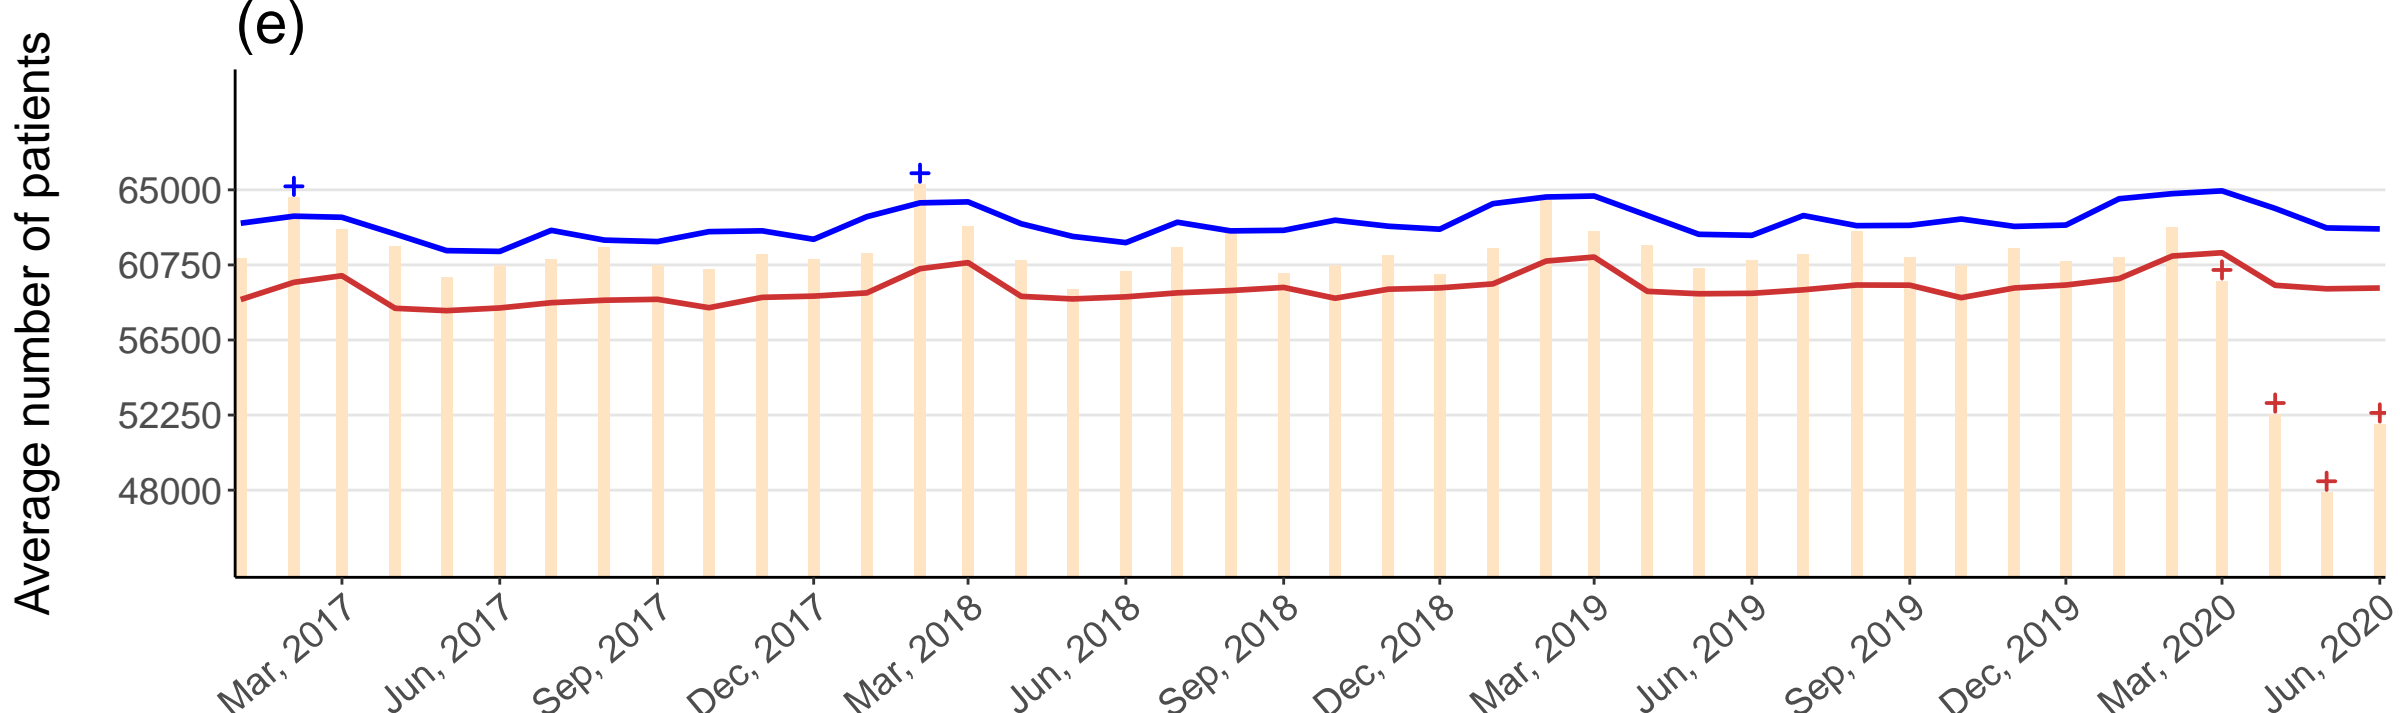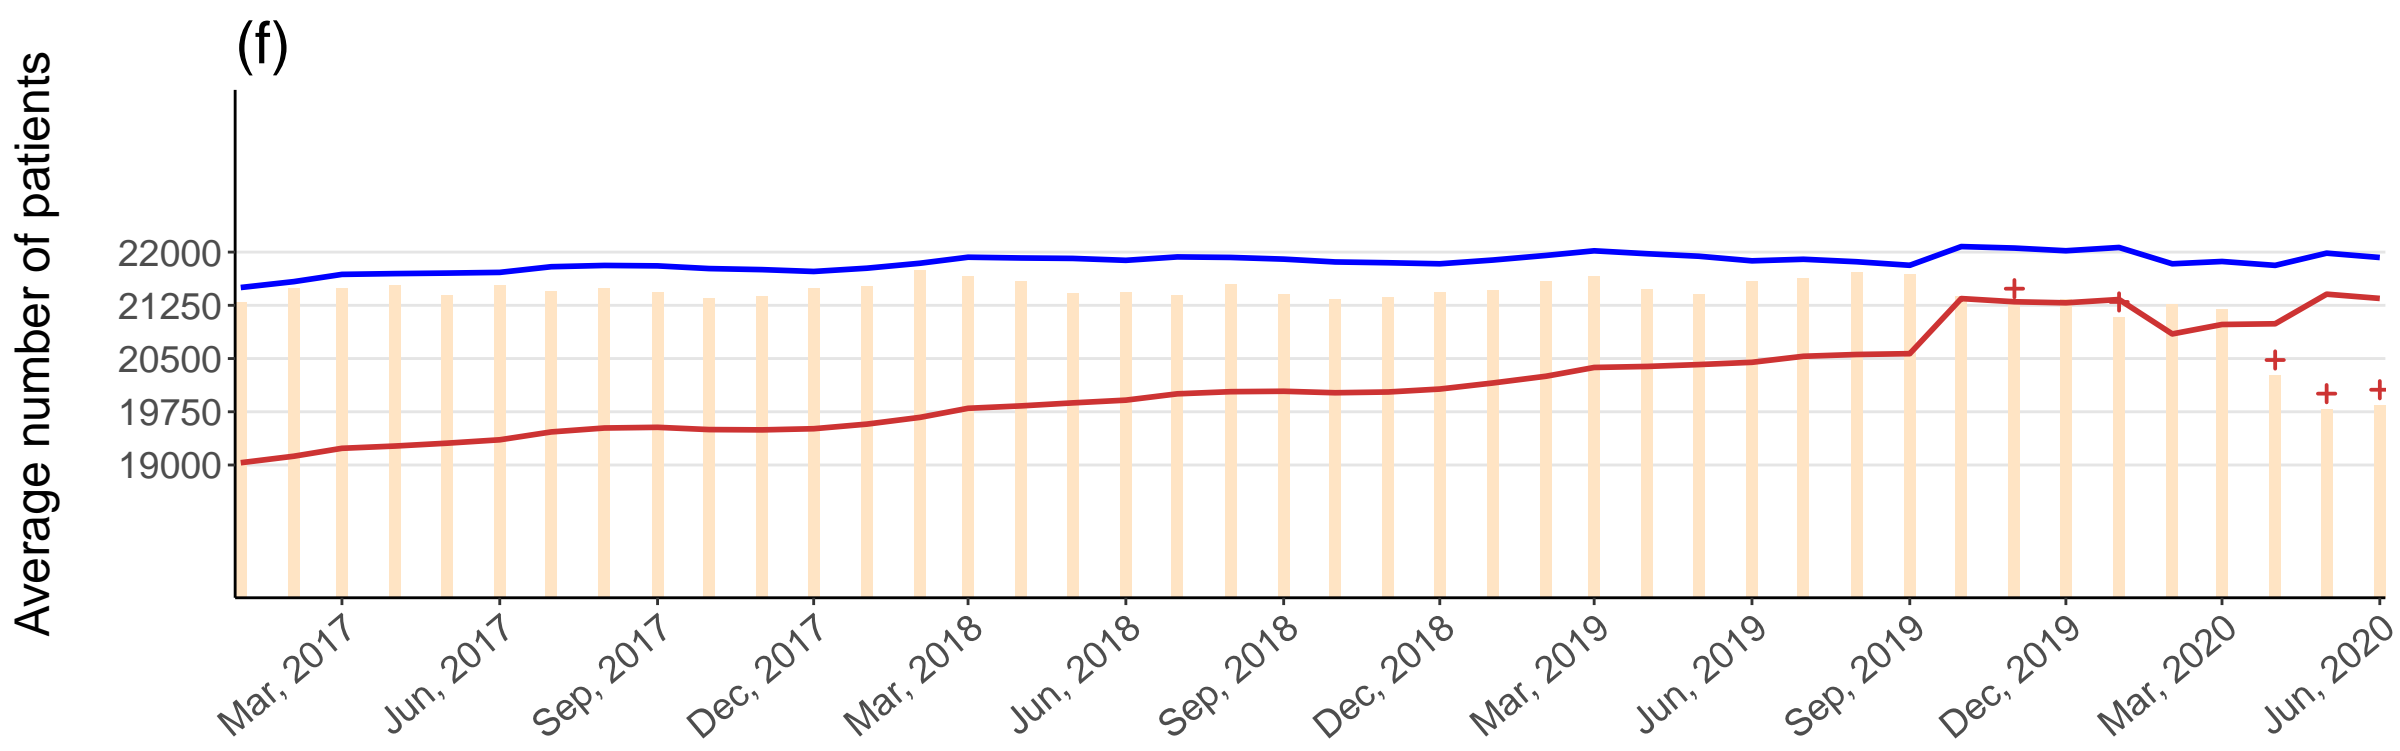

Kanagawa

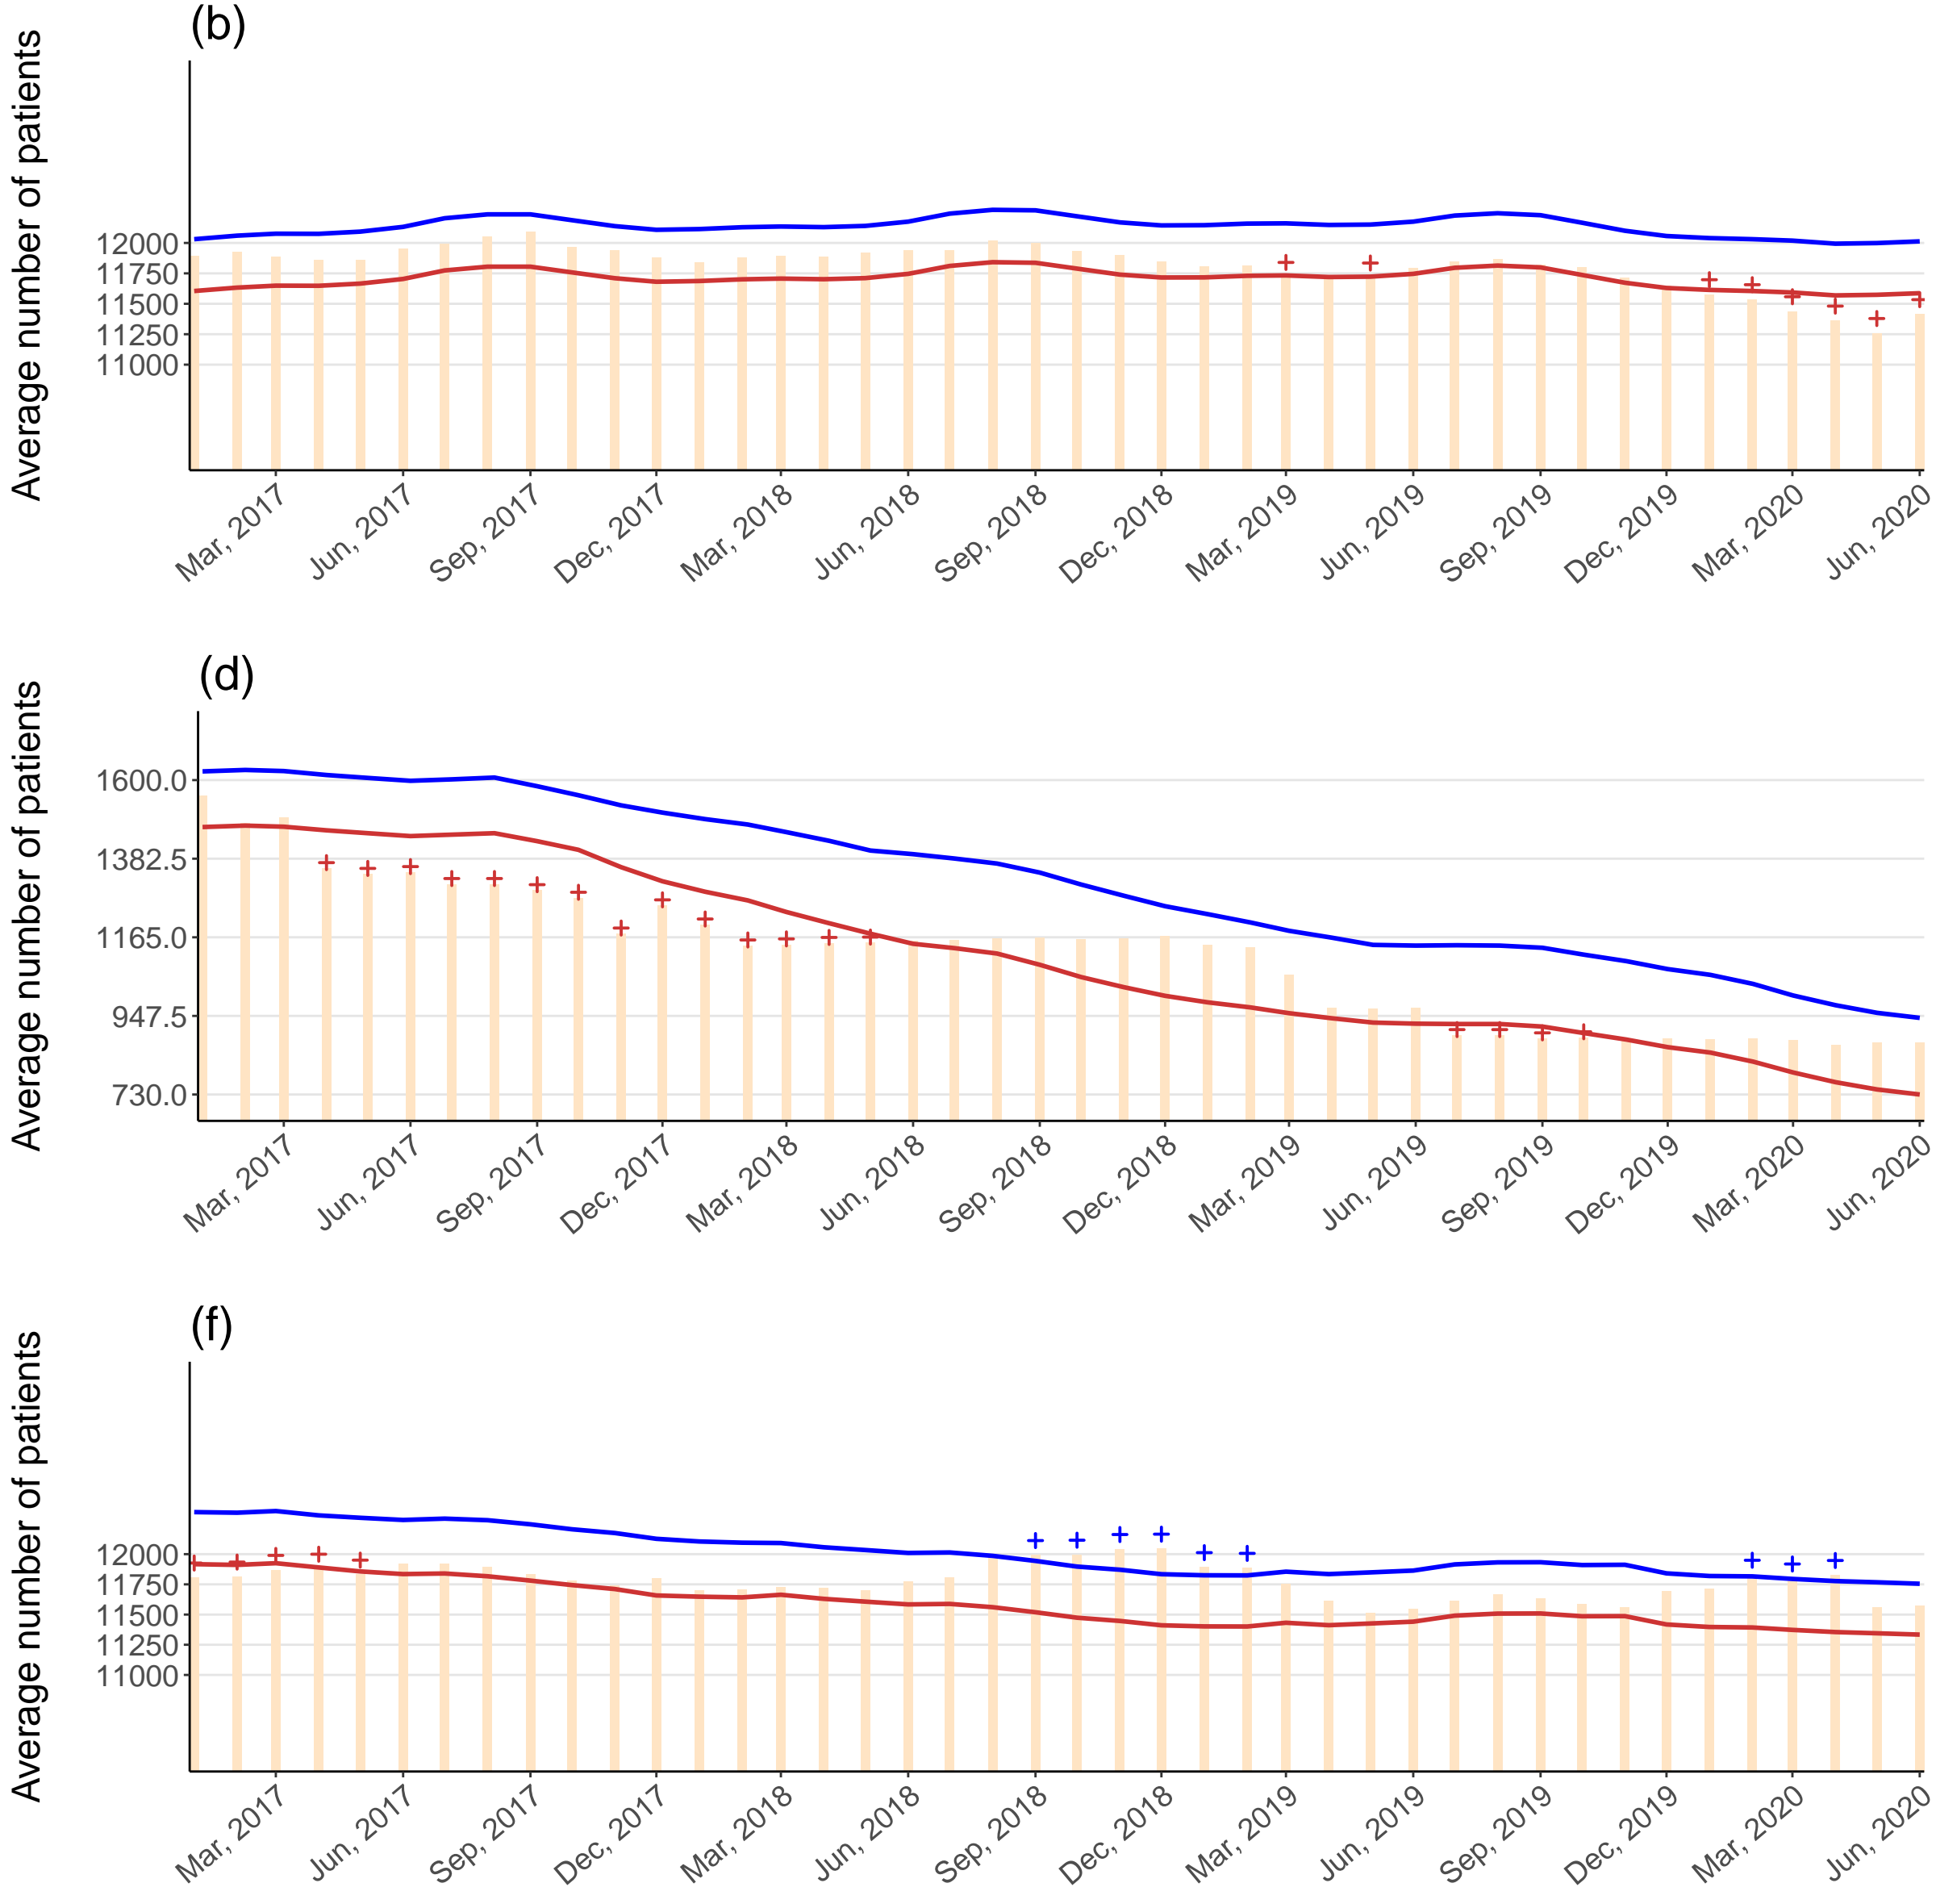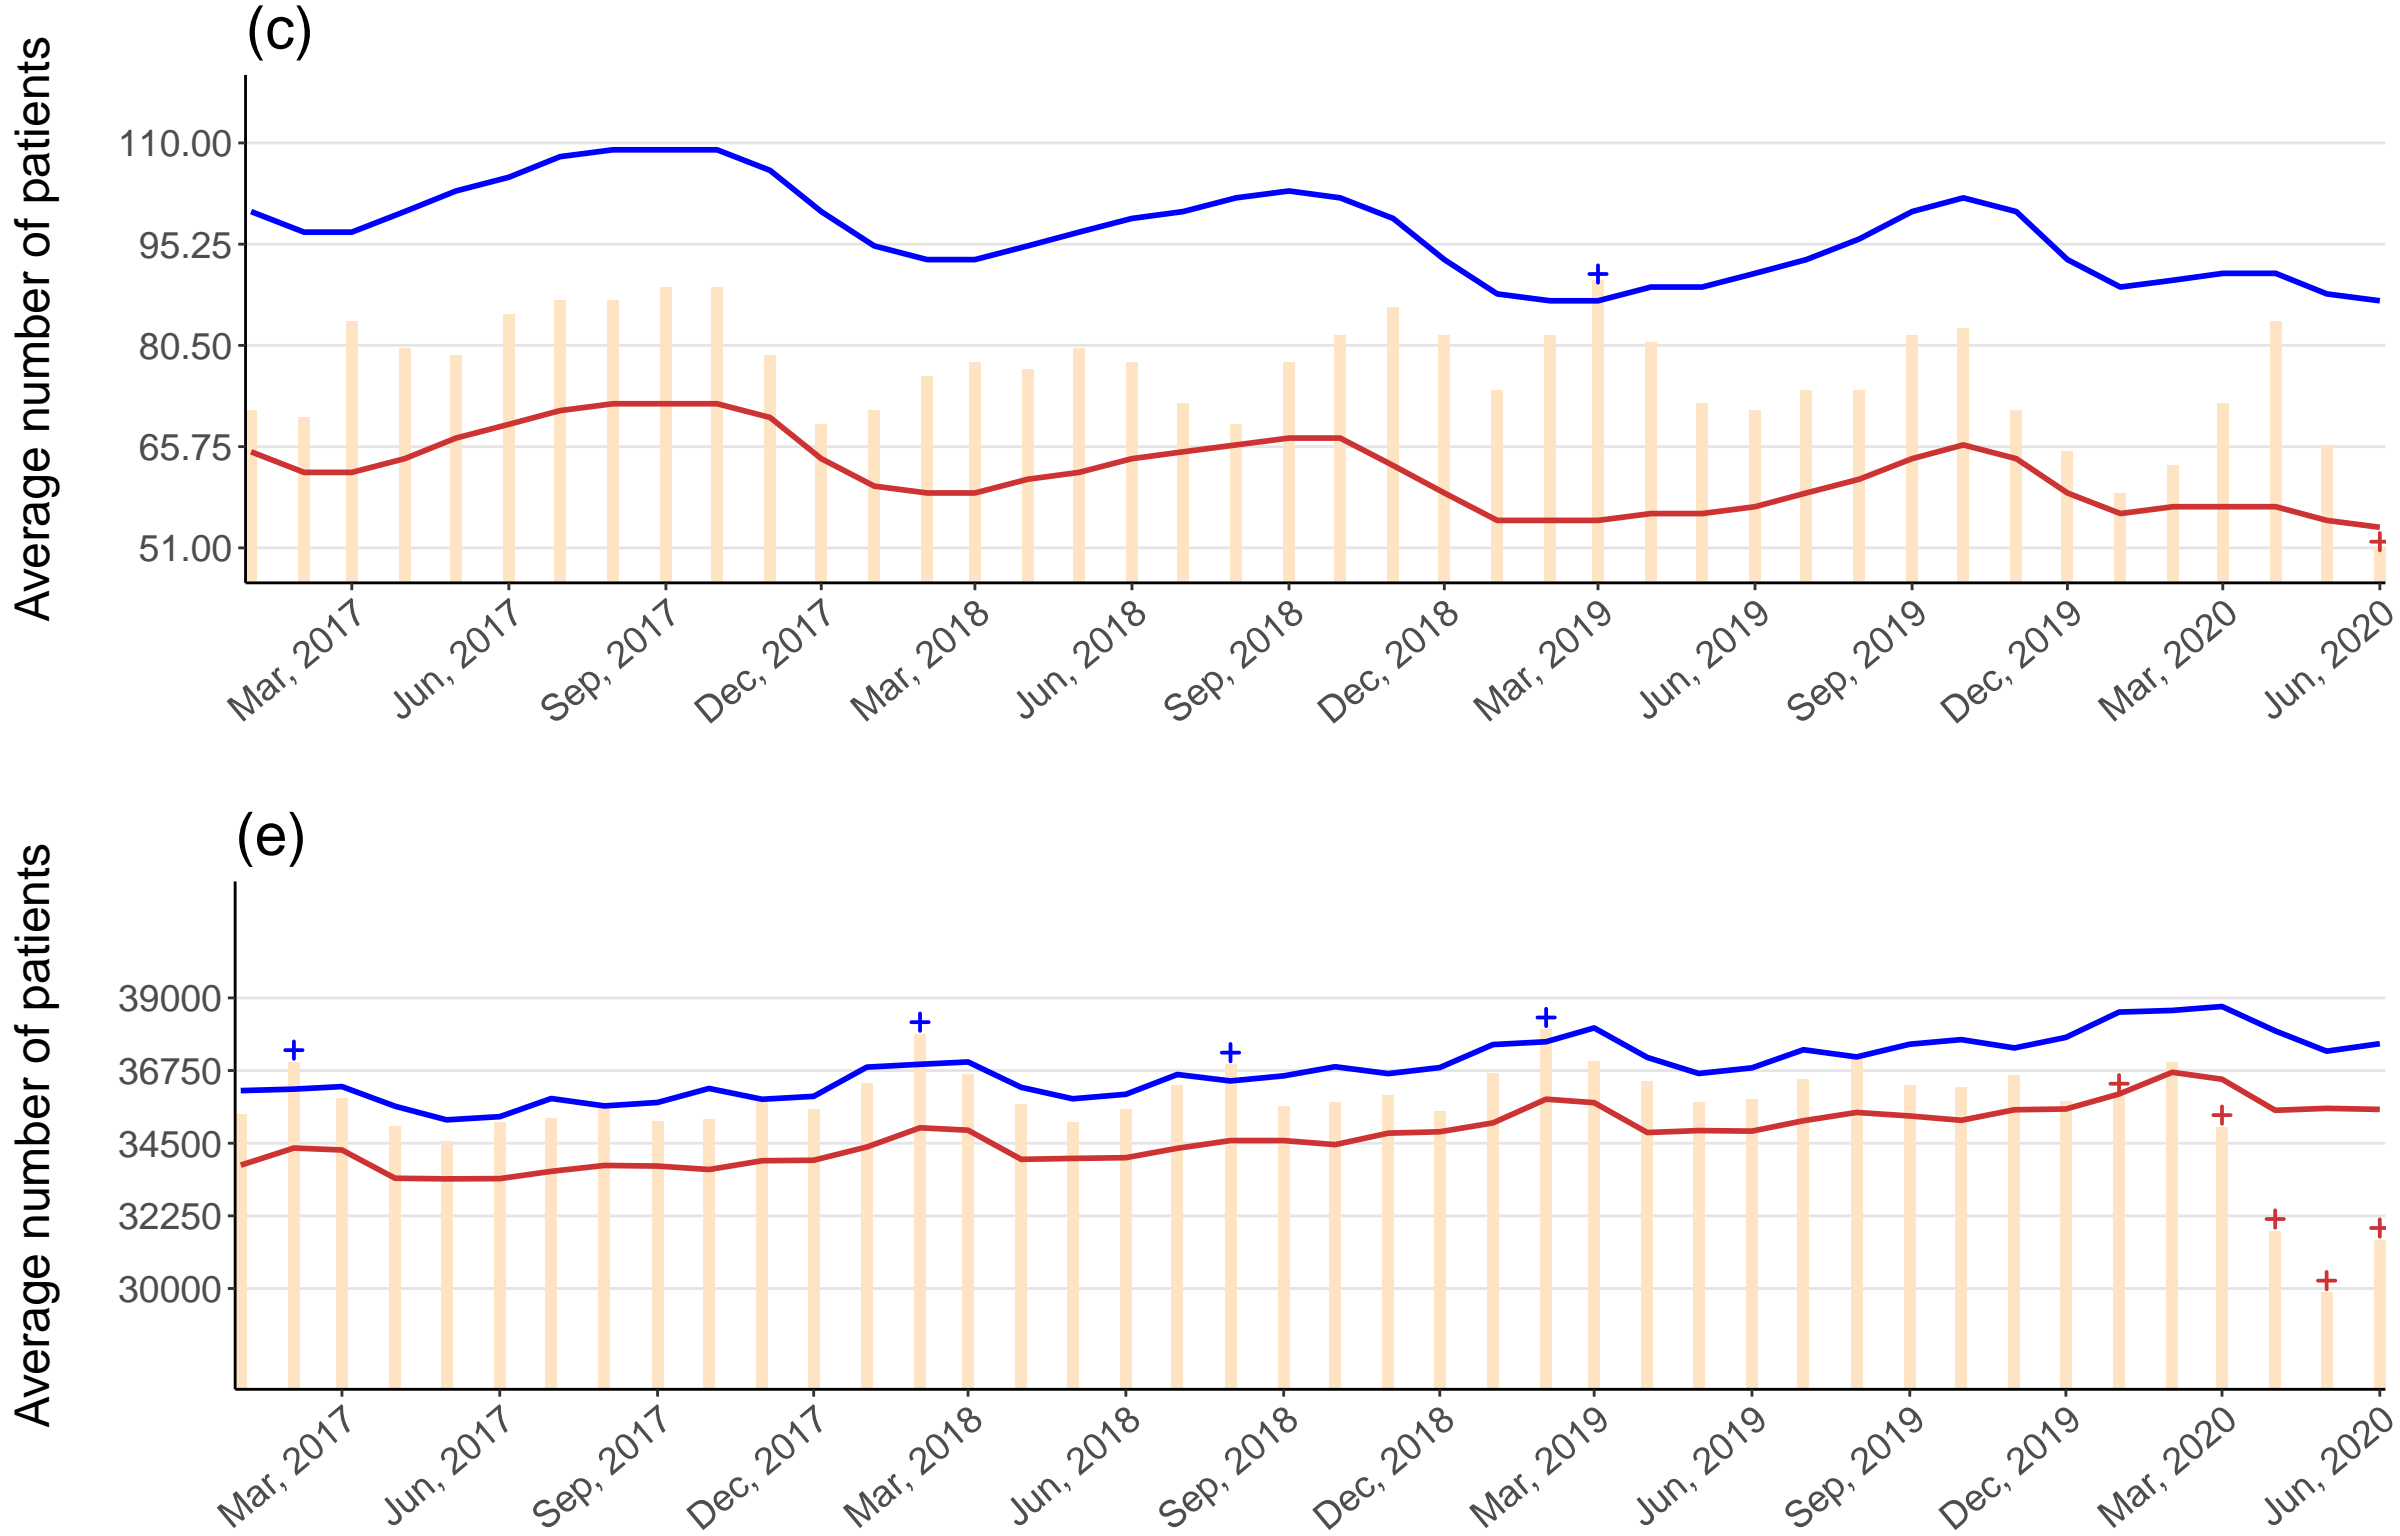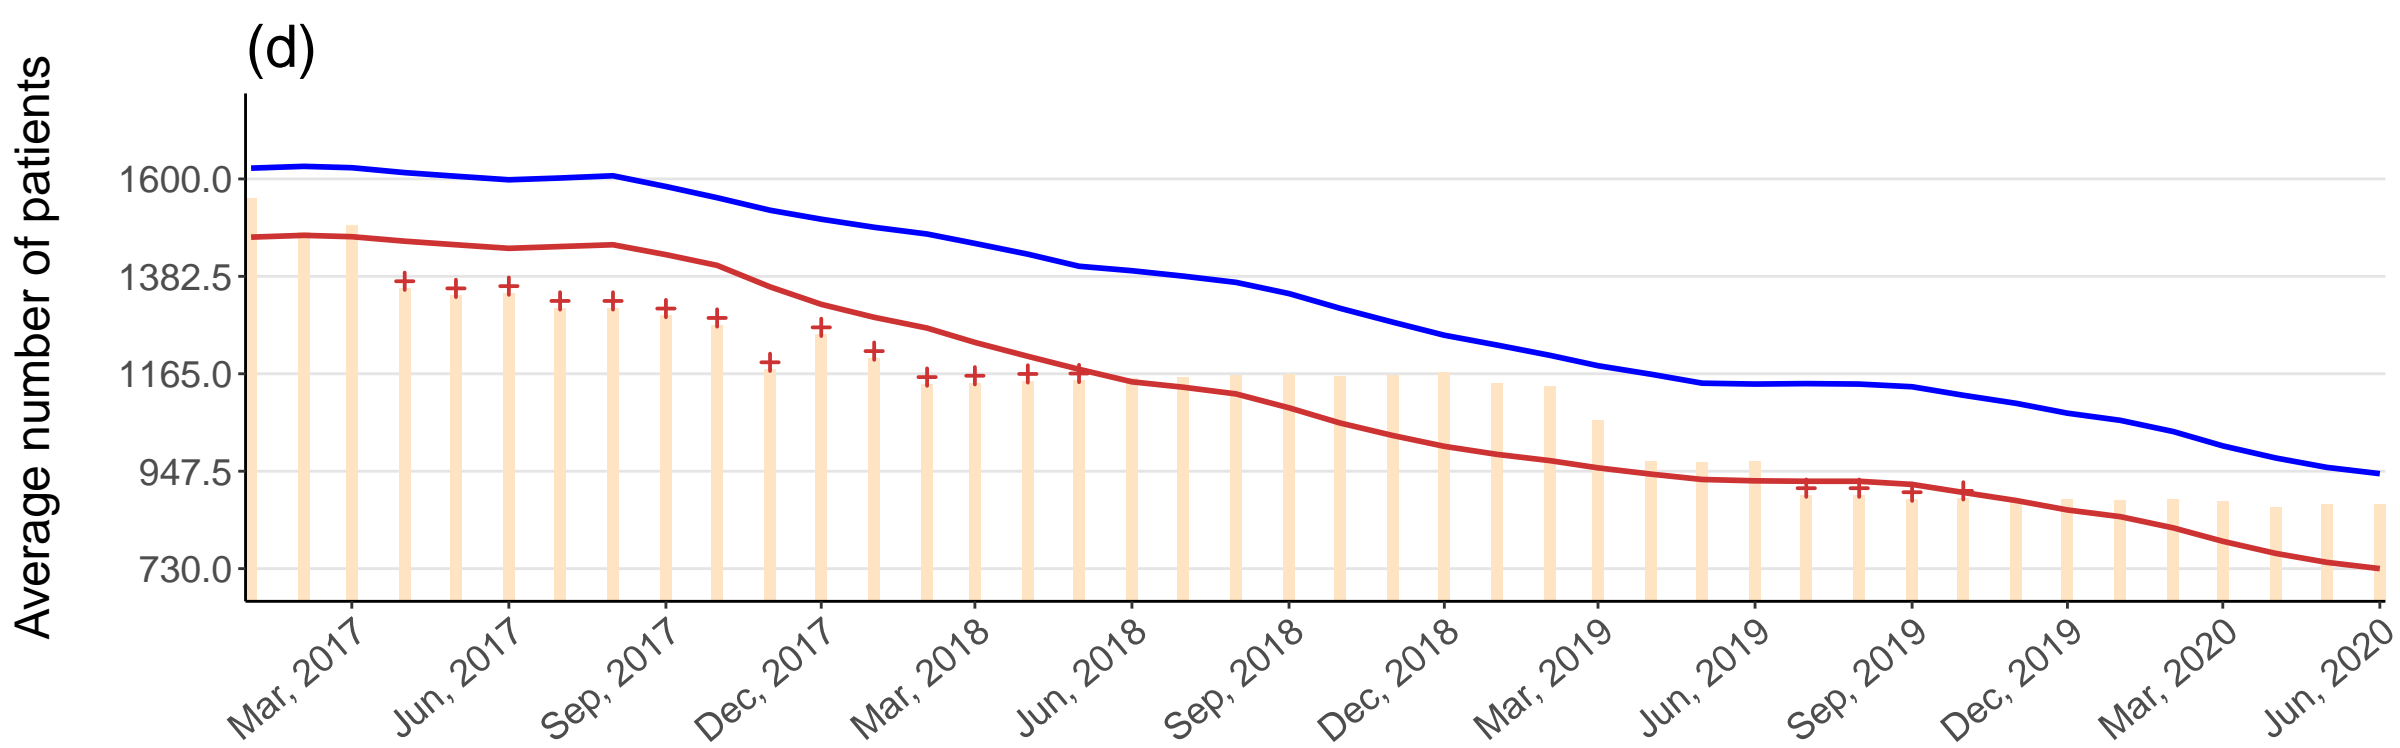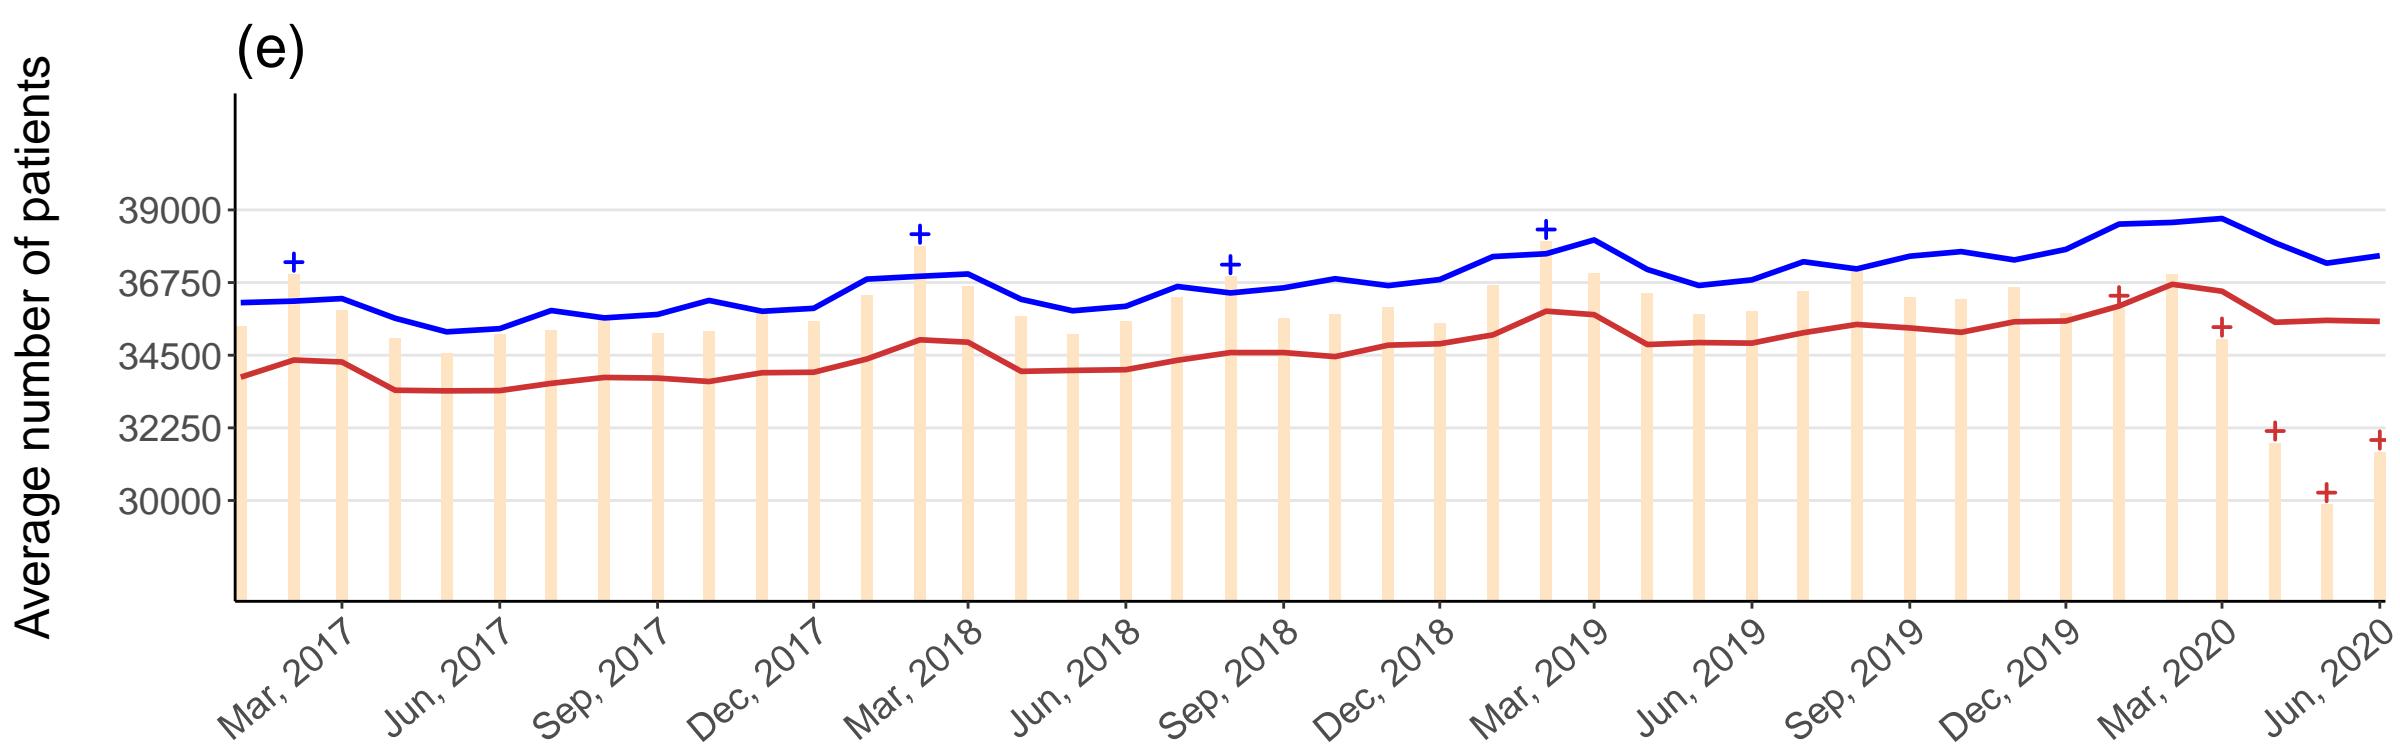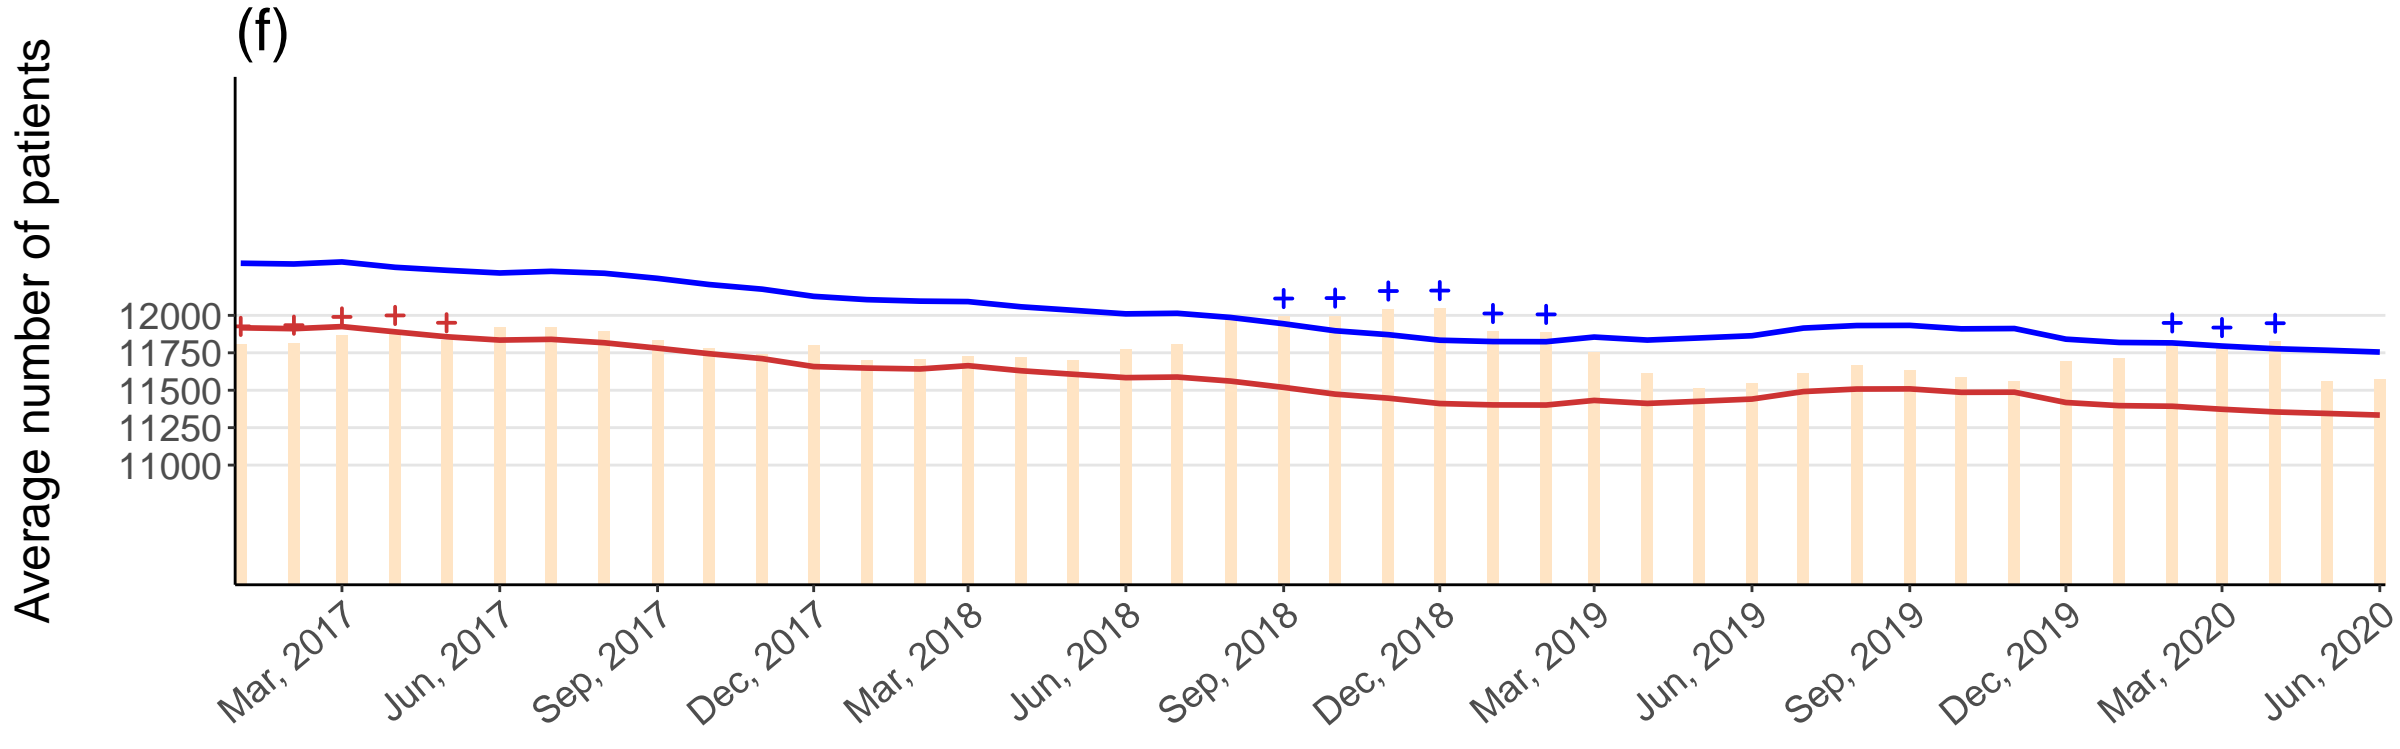

Niigata

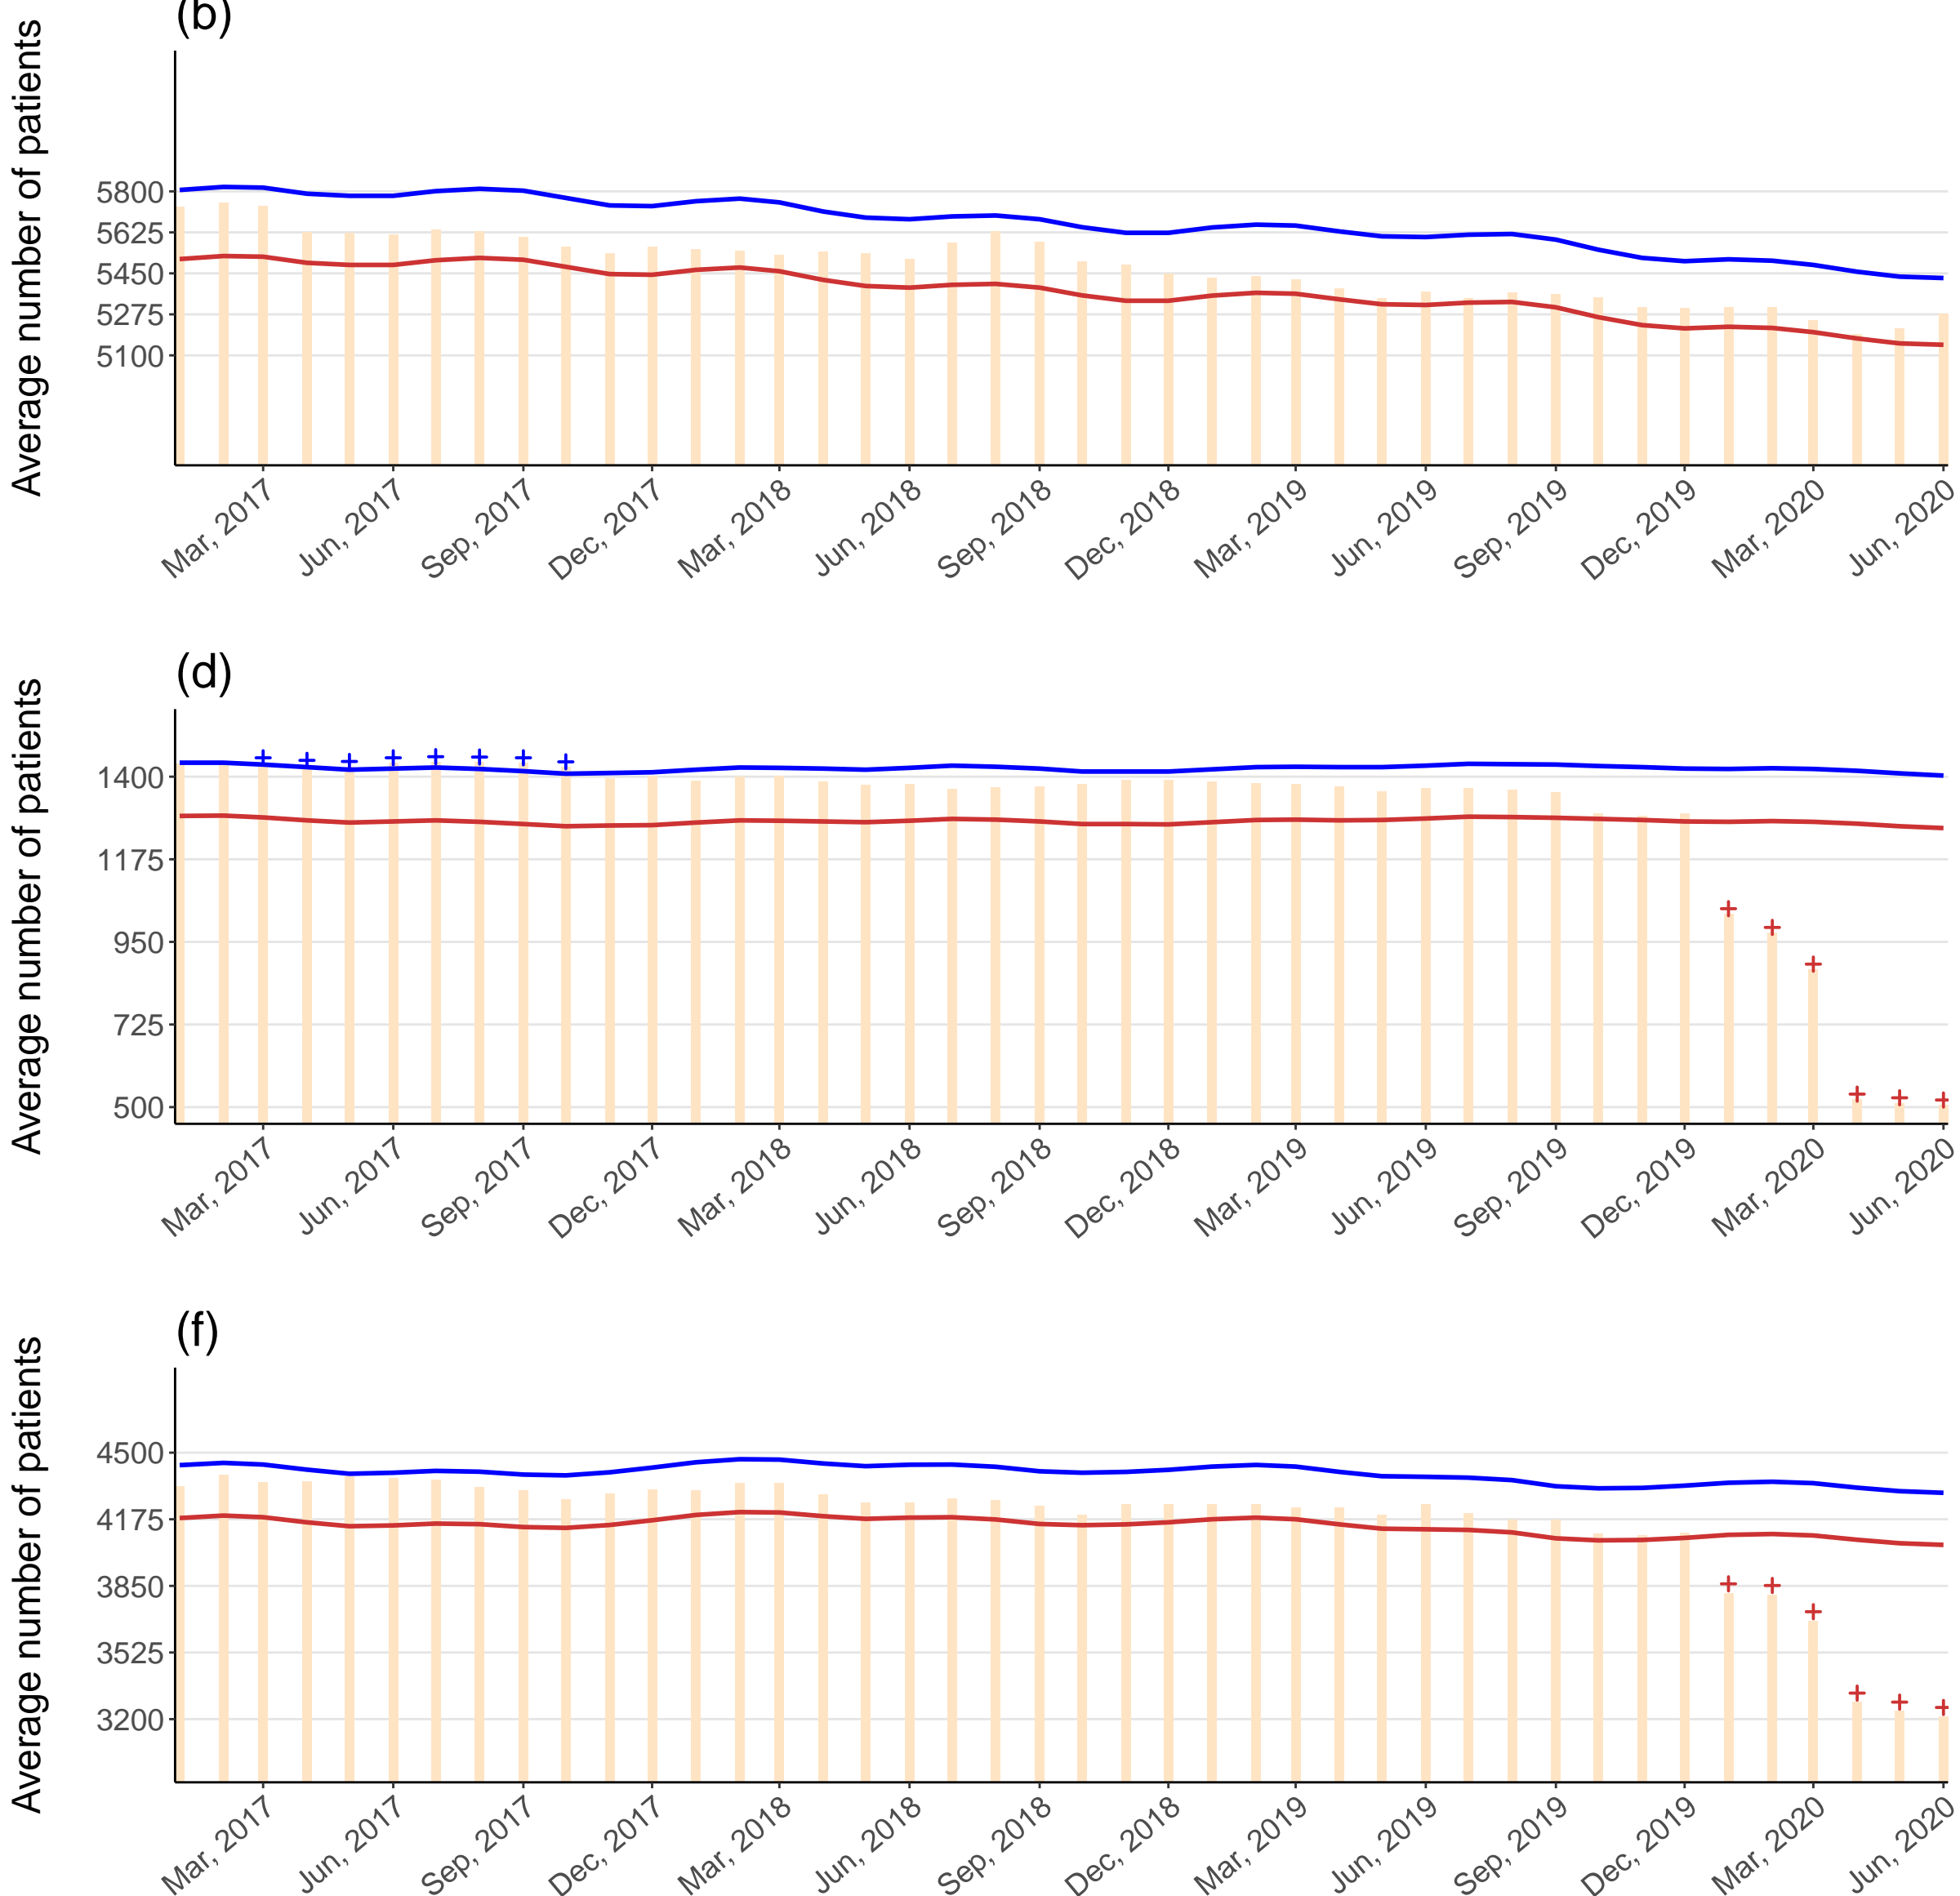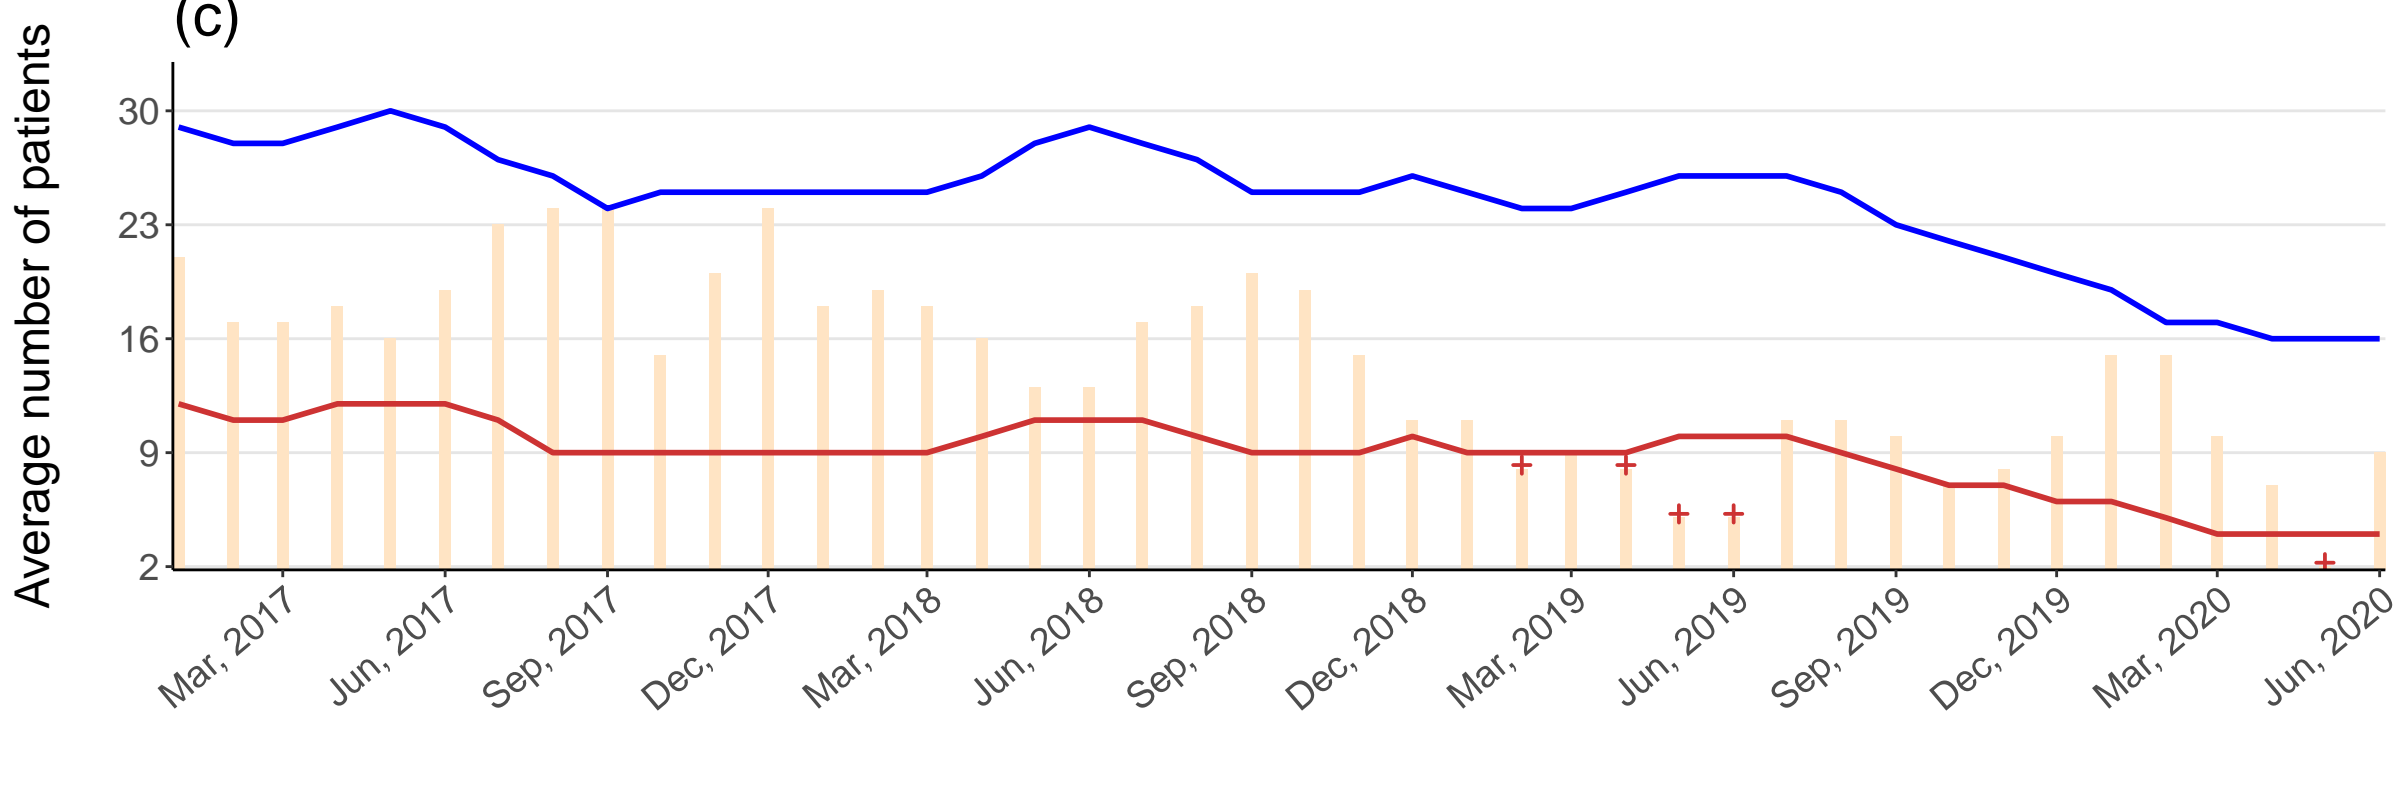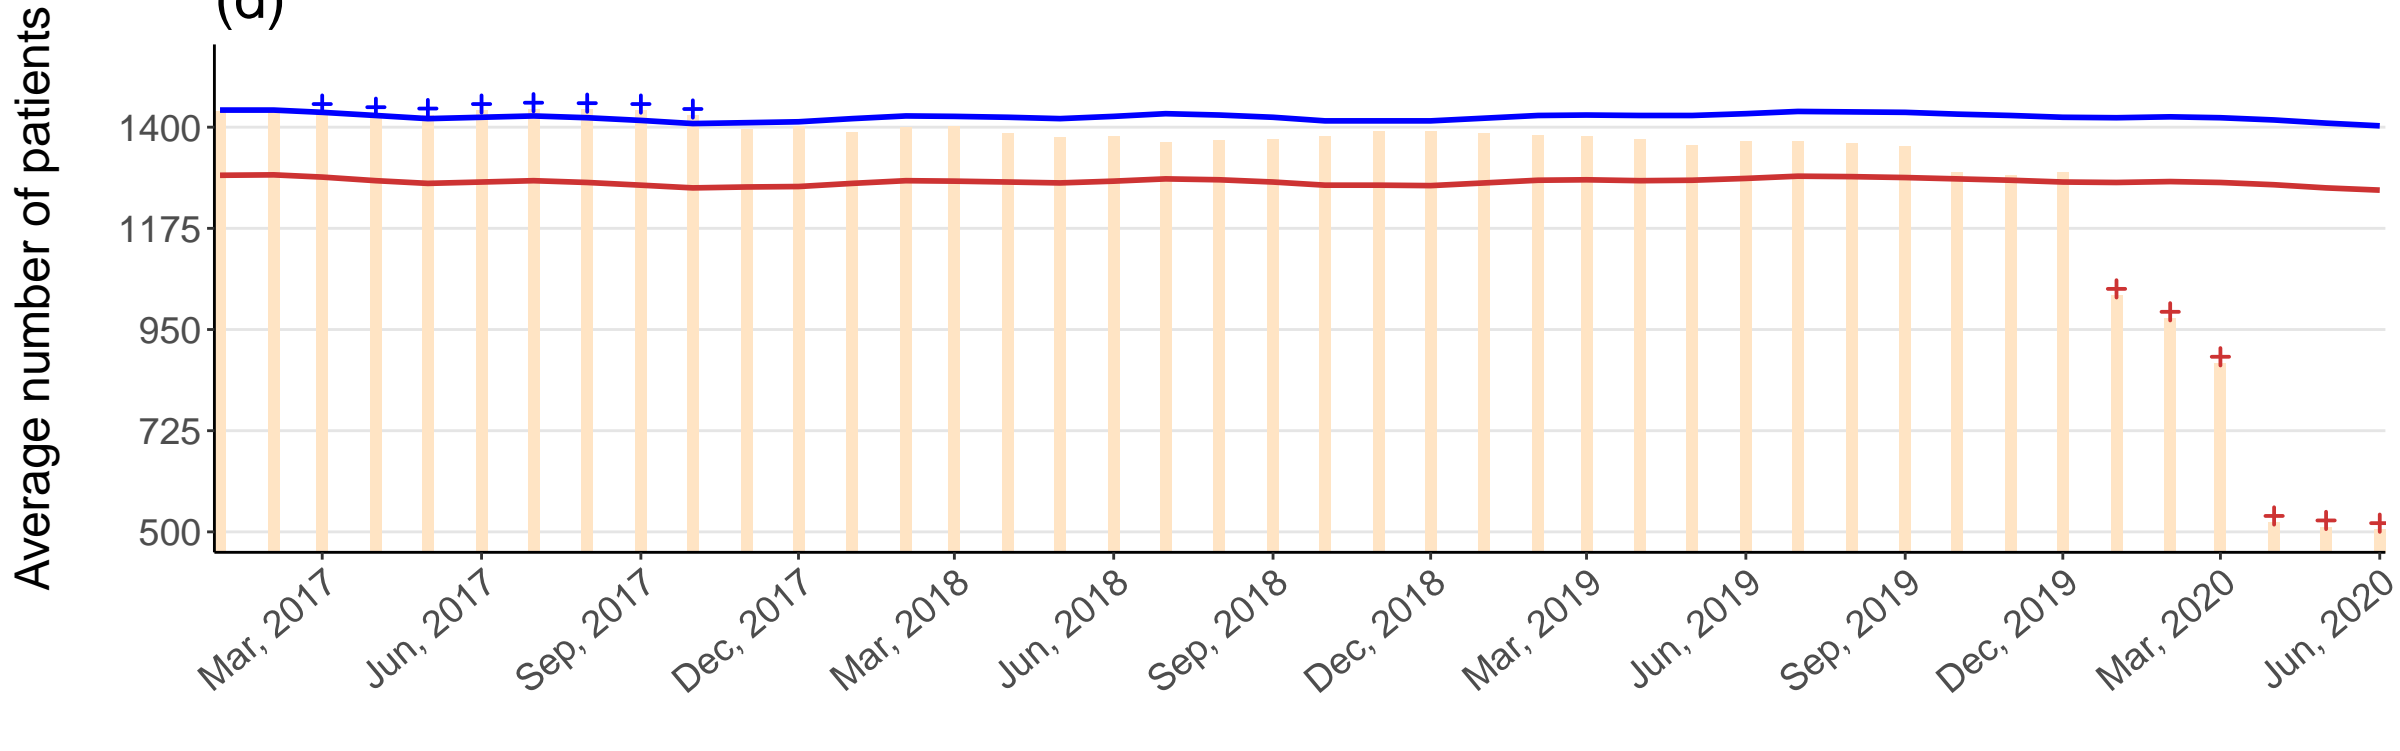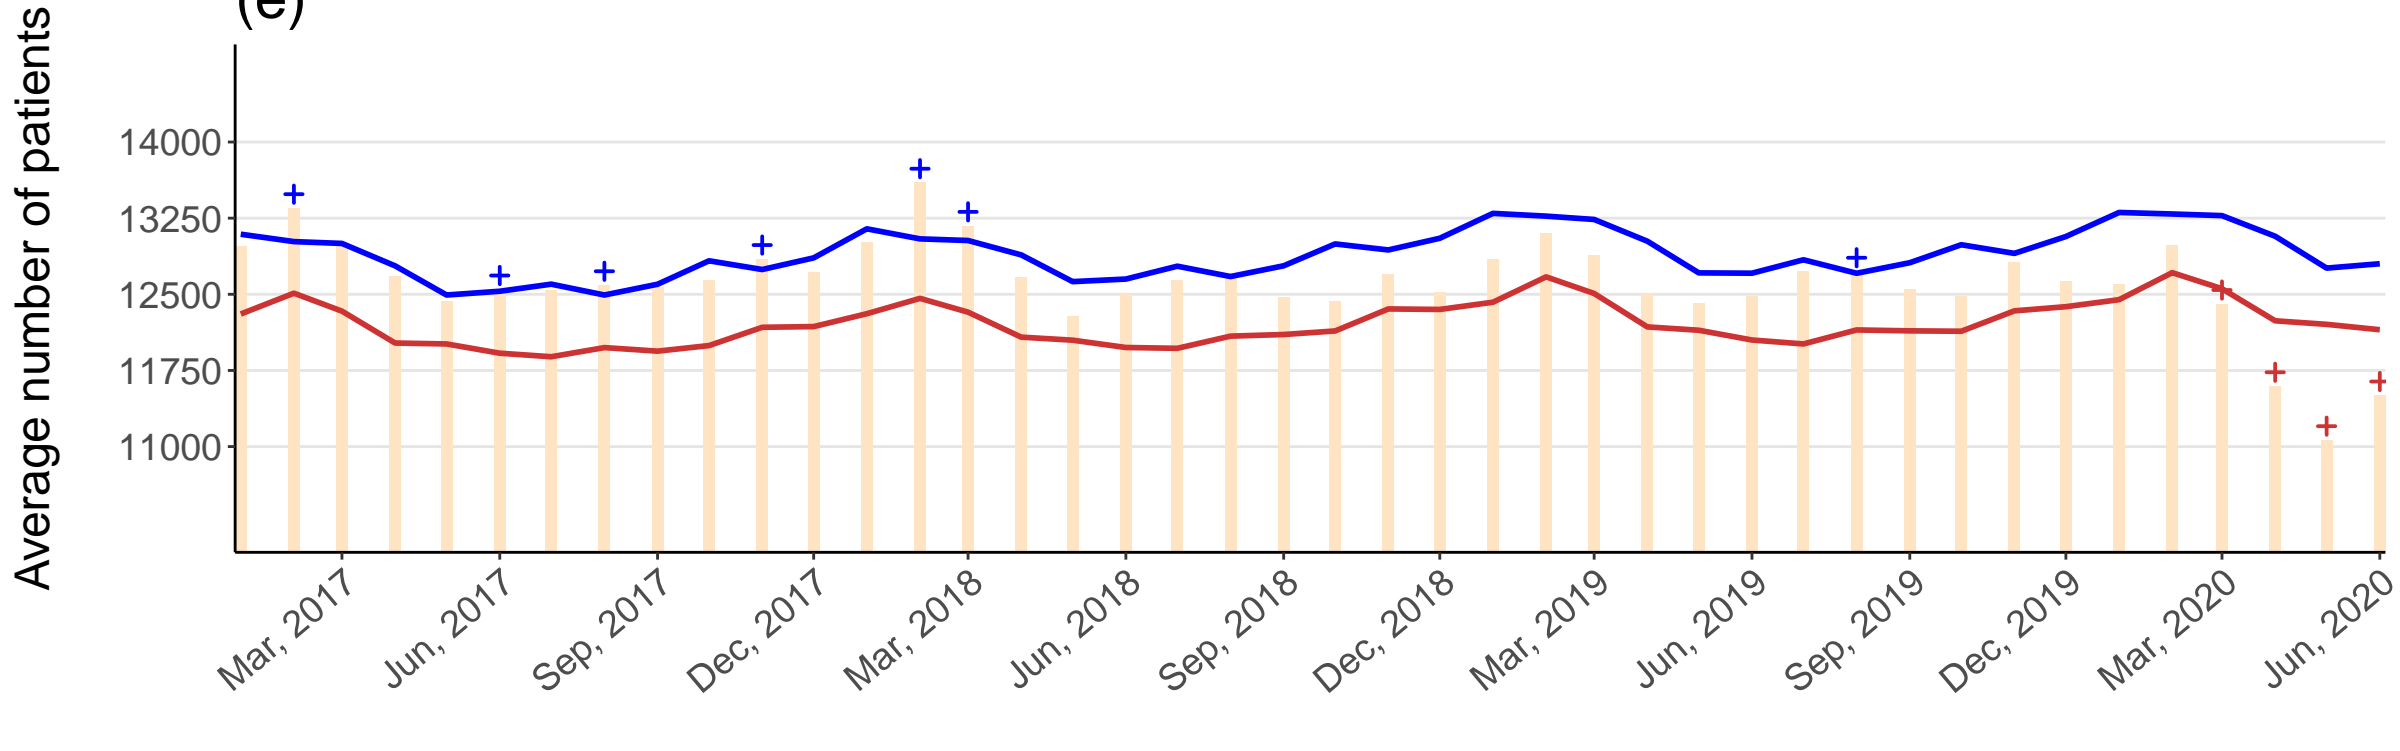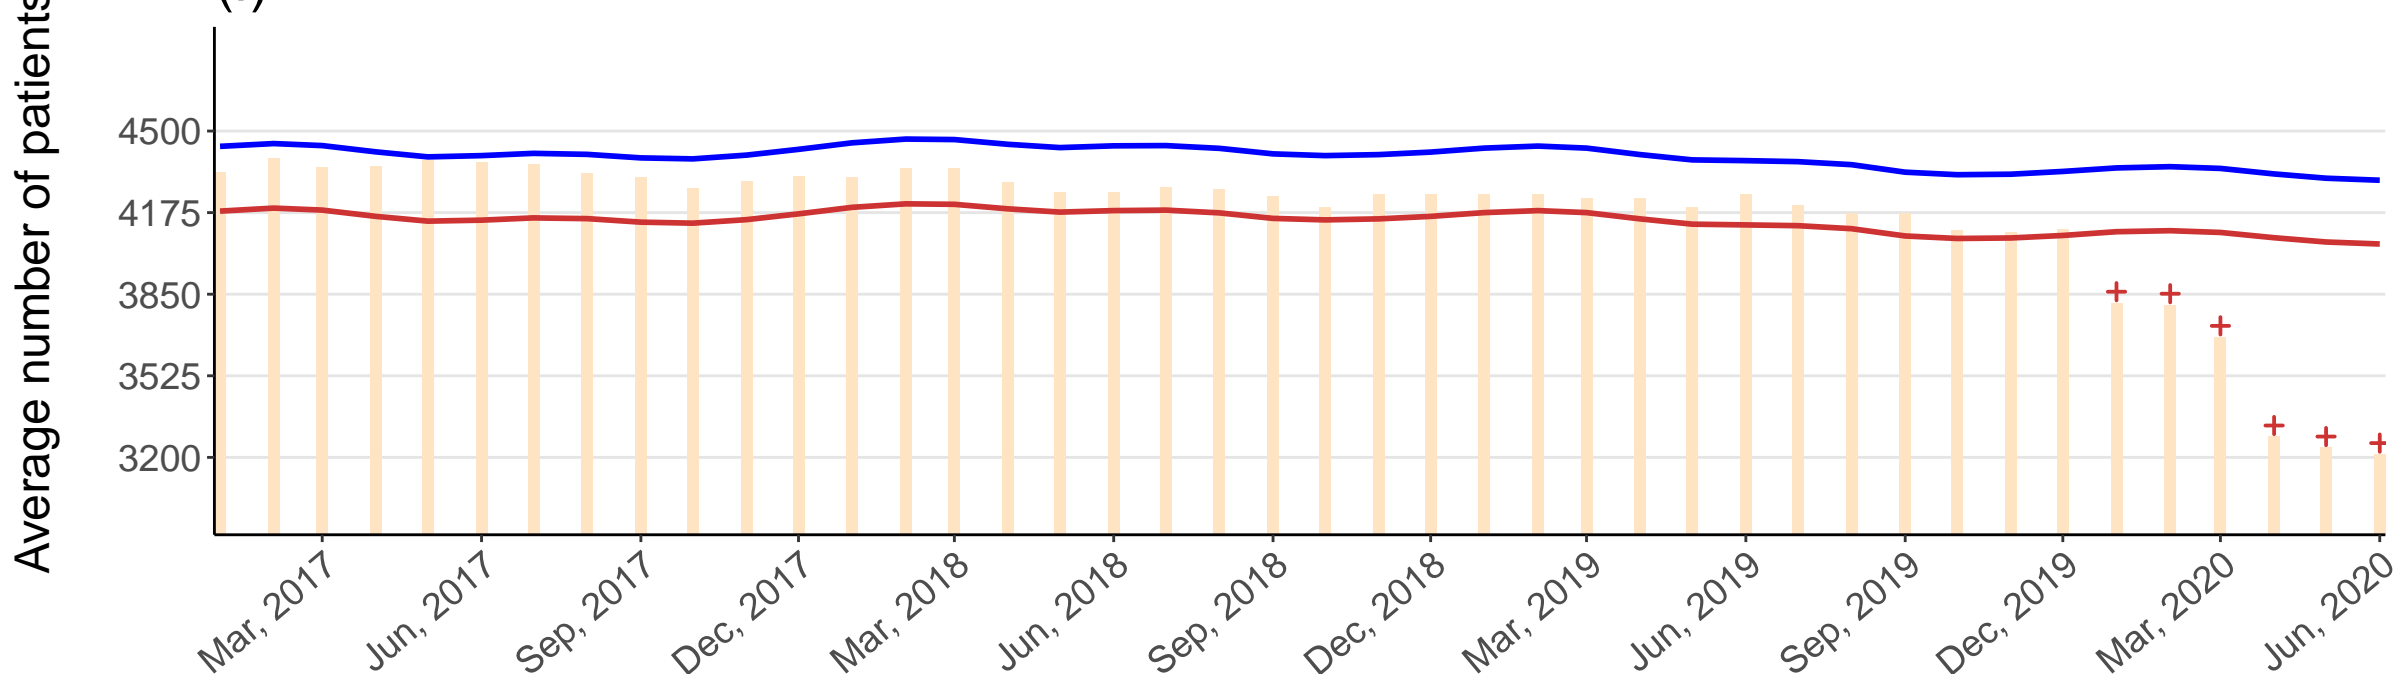

# Toyama

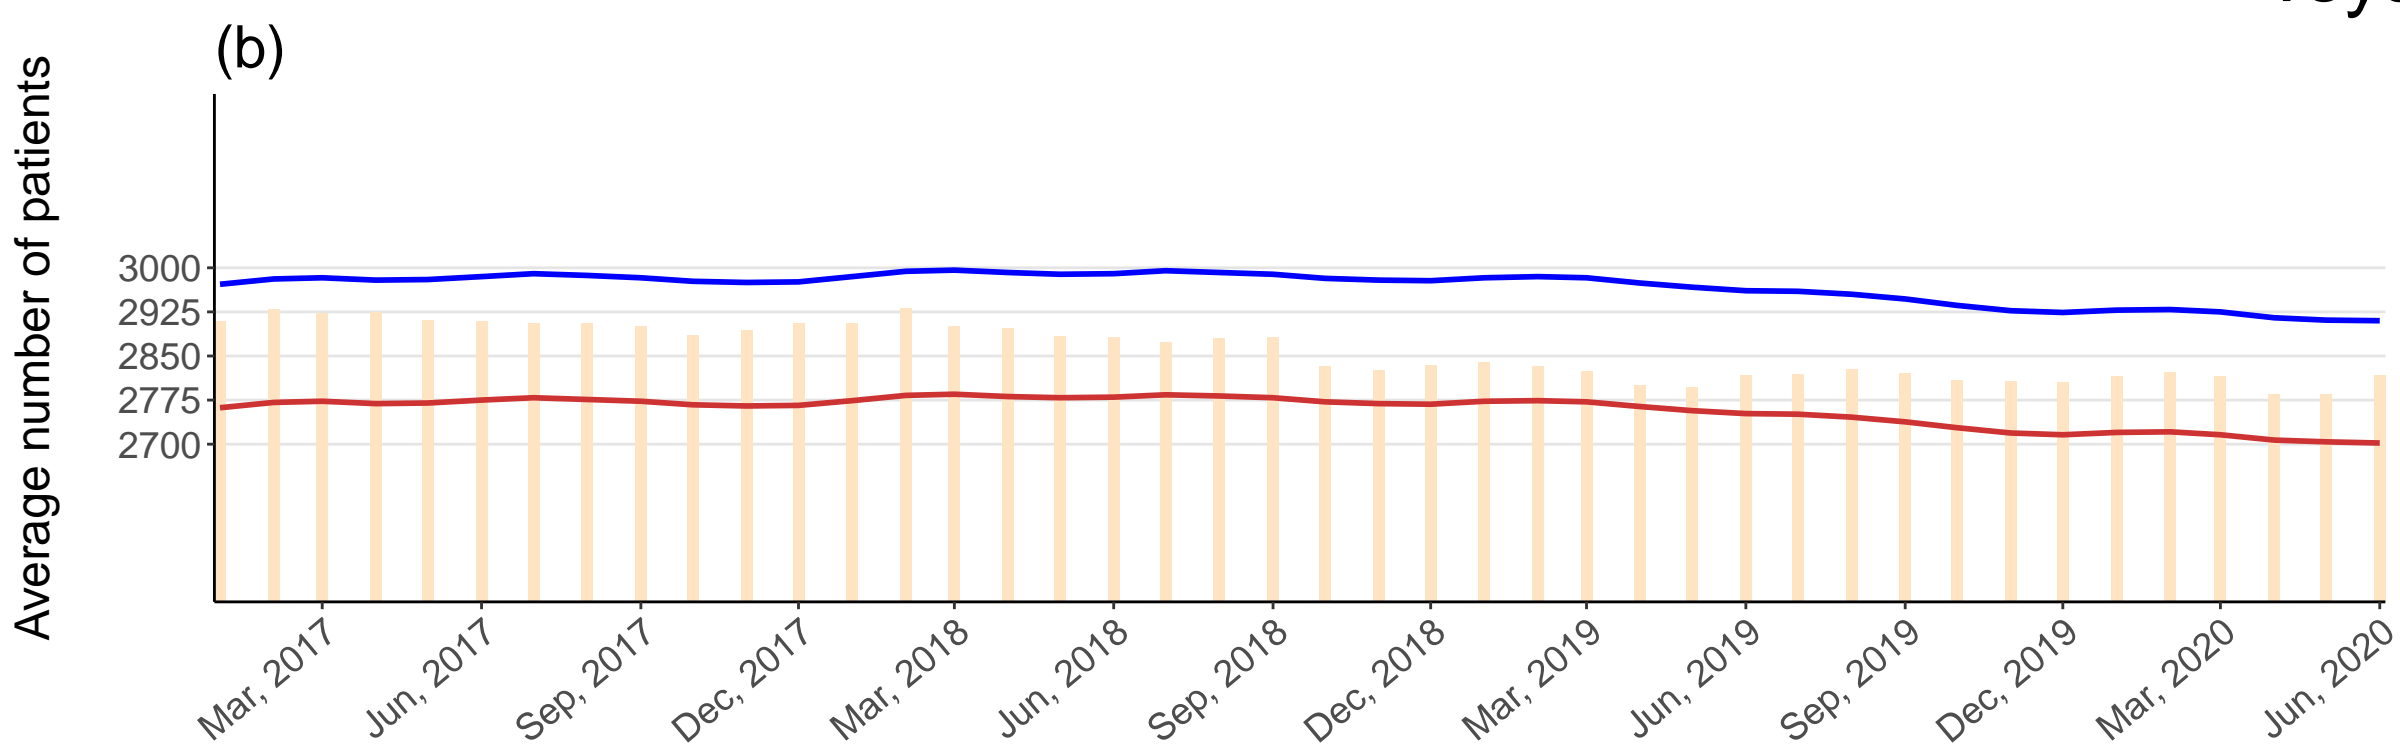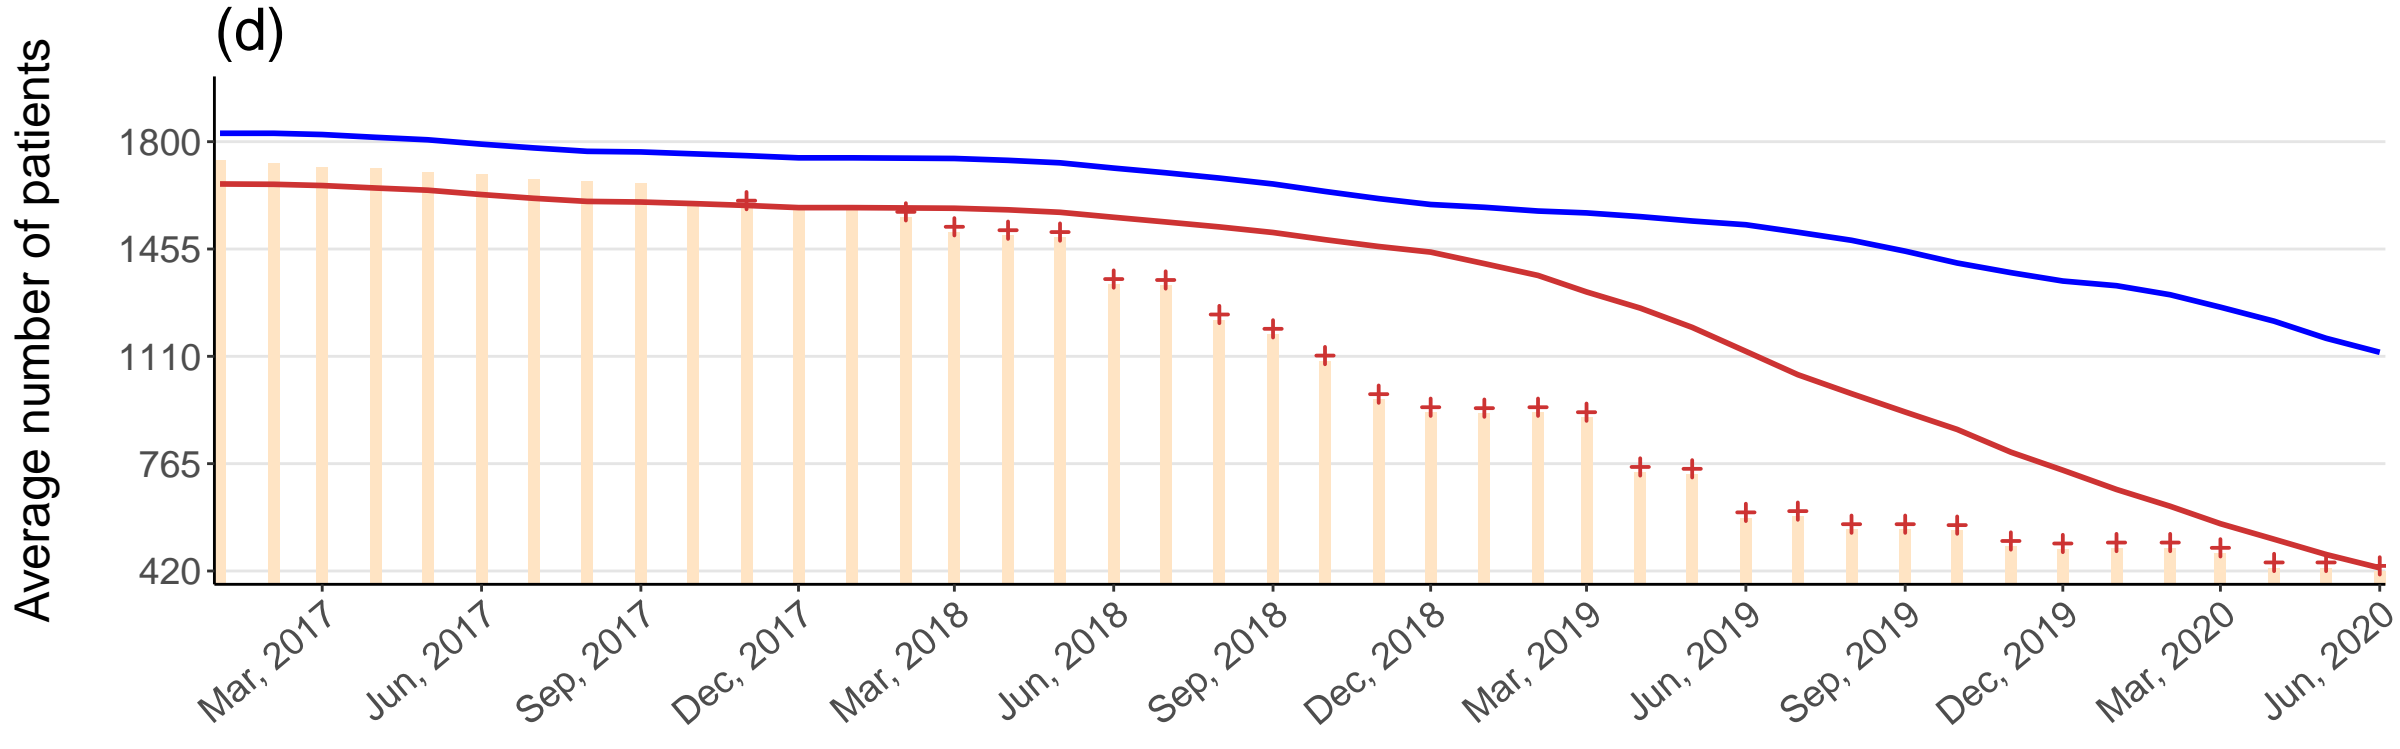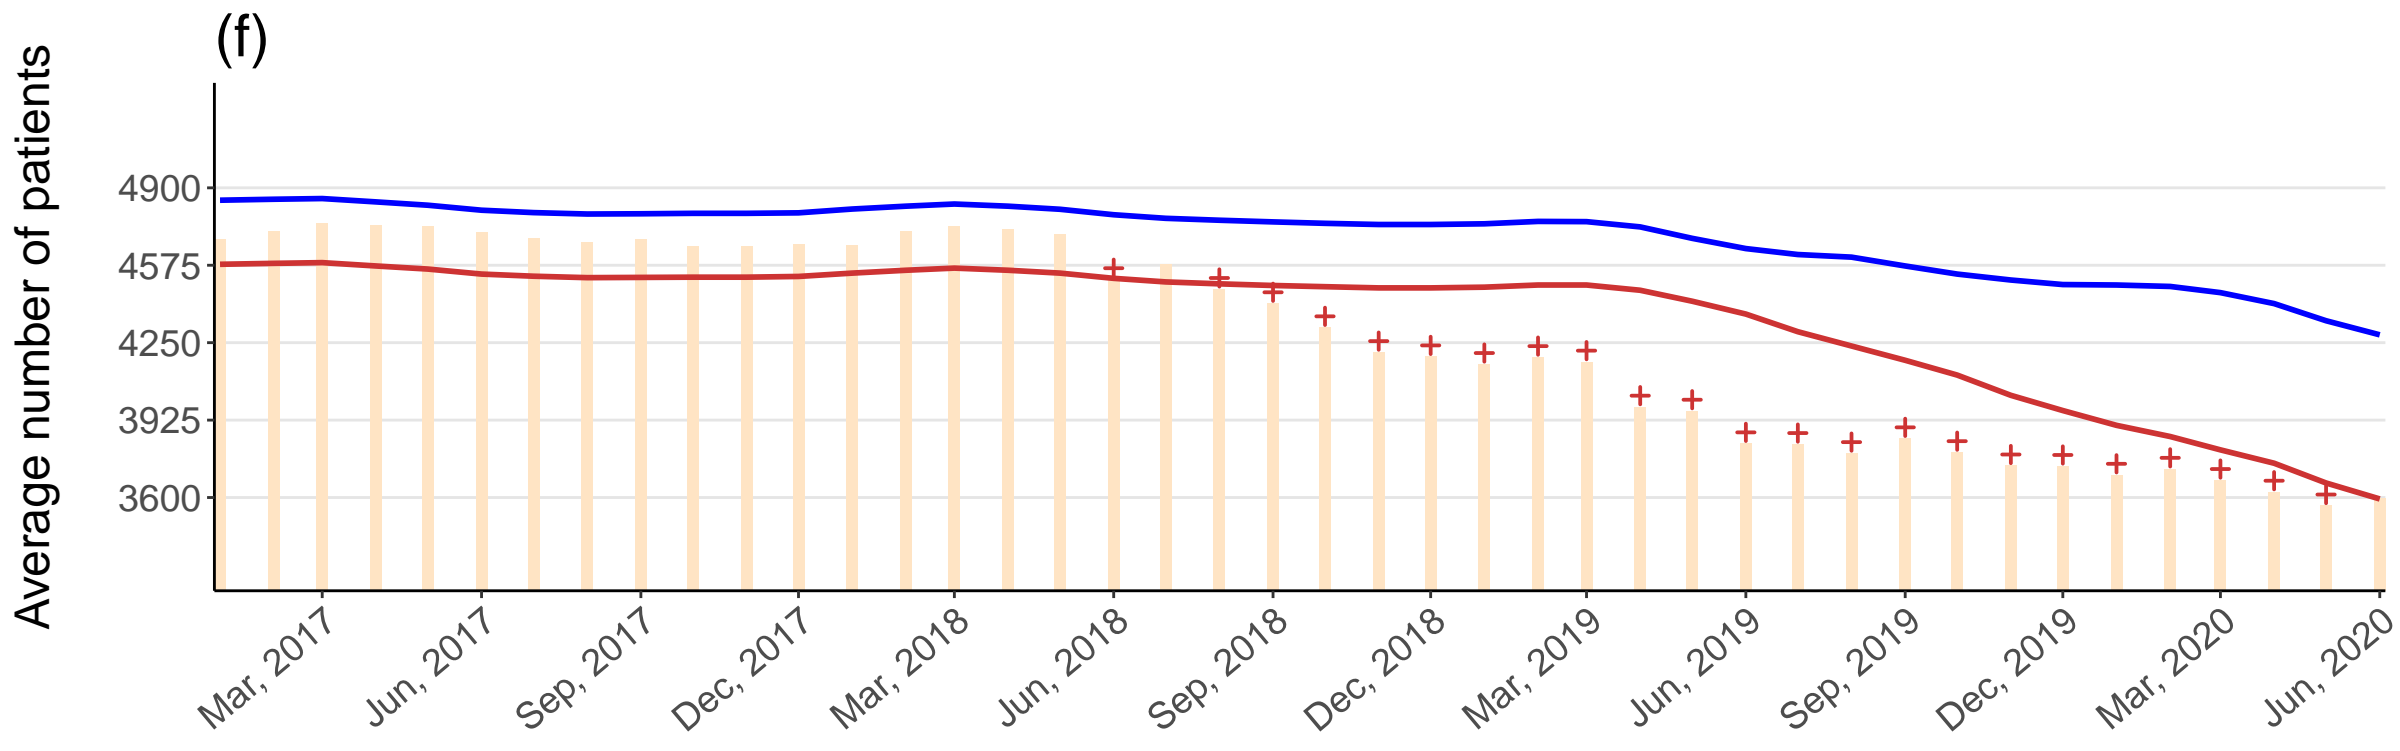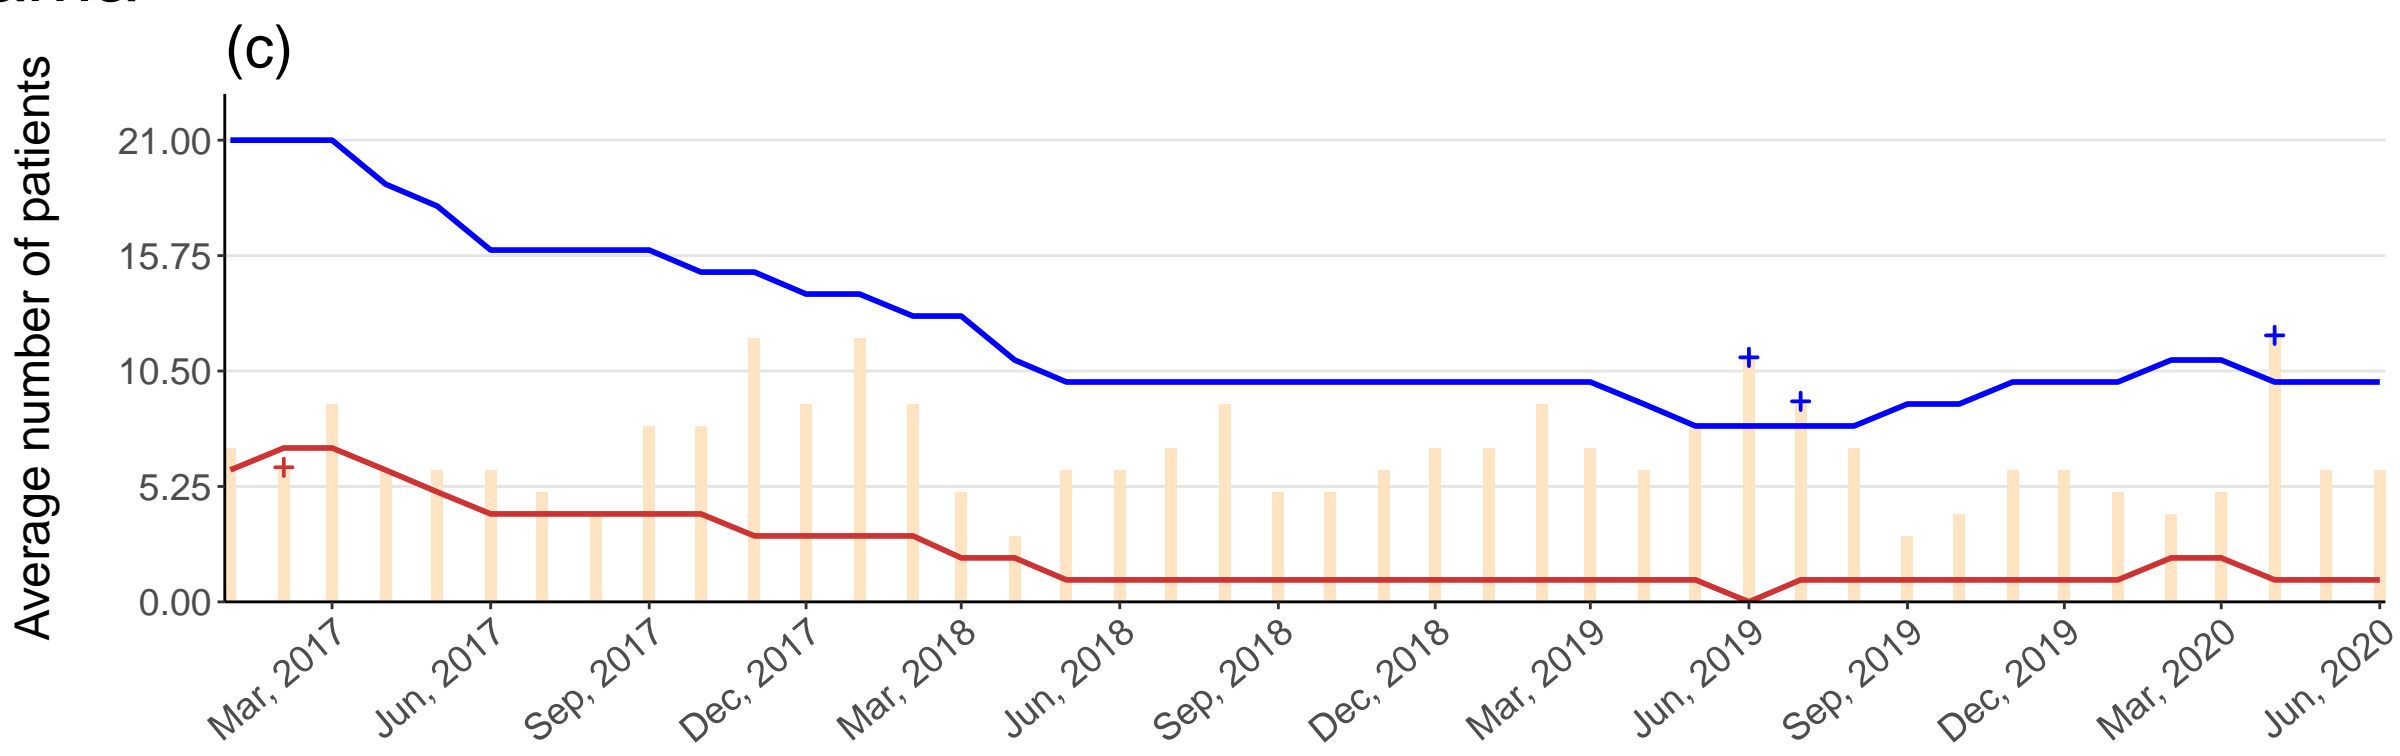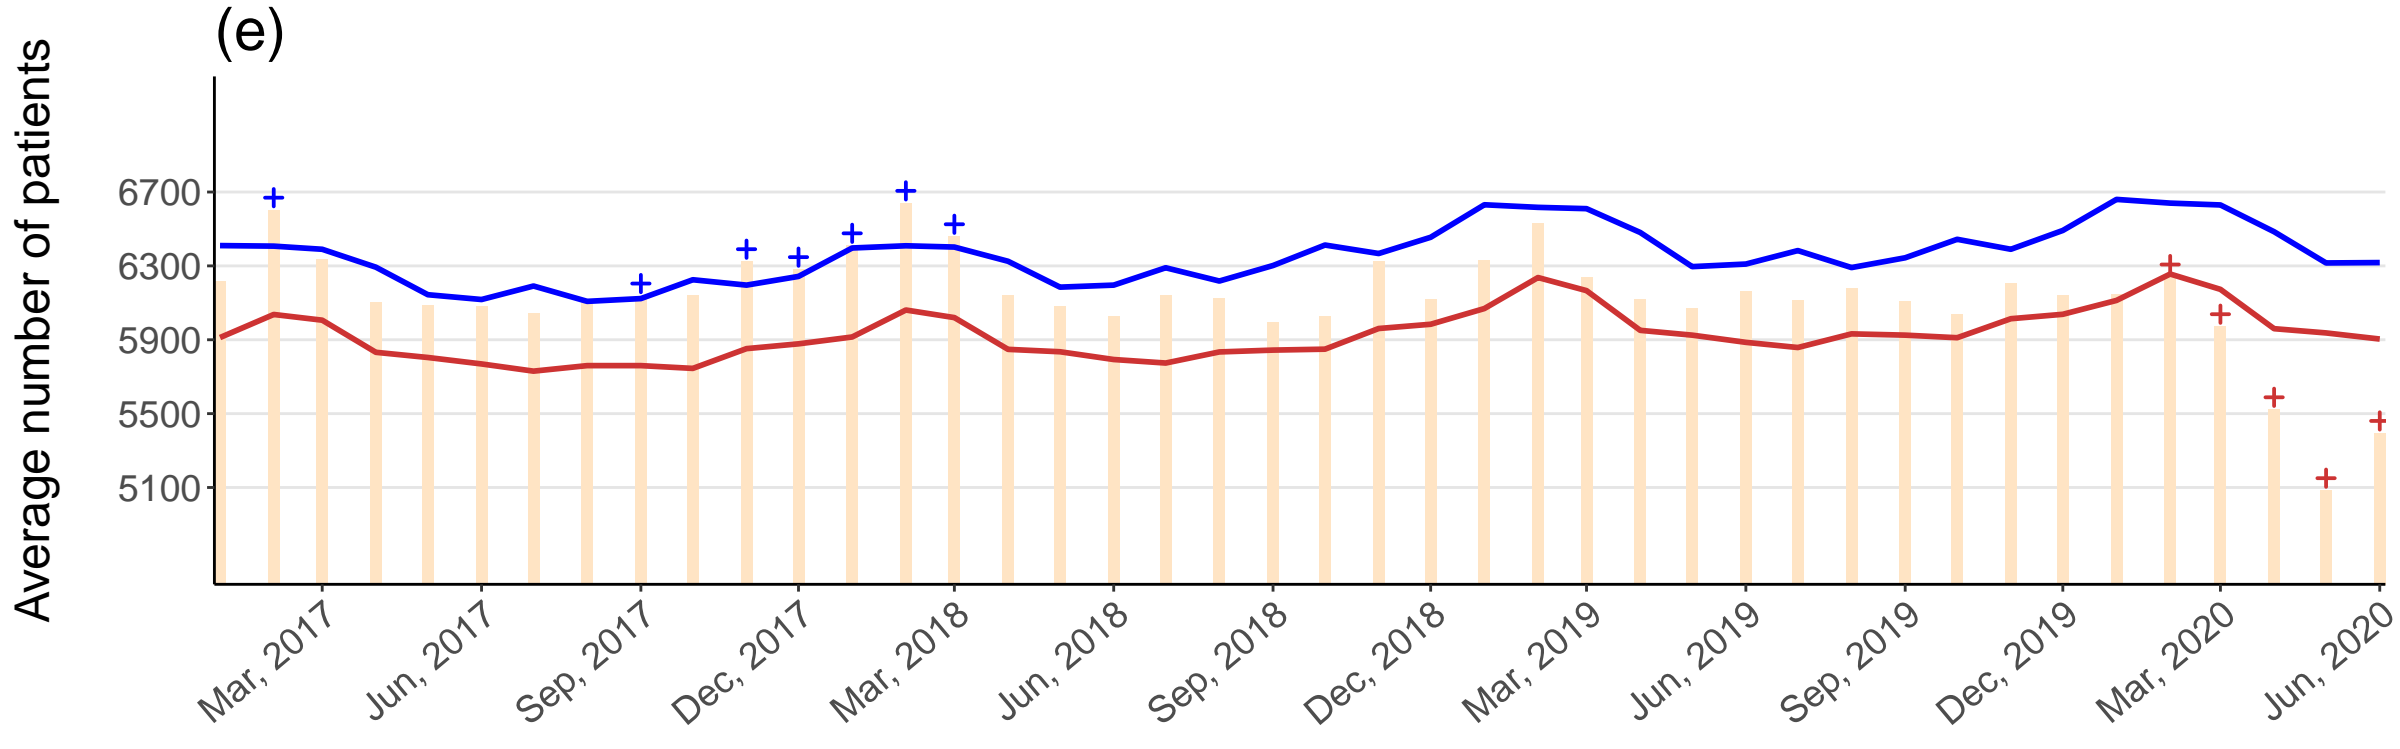

## Ishikawa

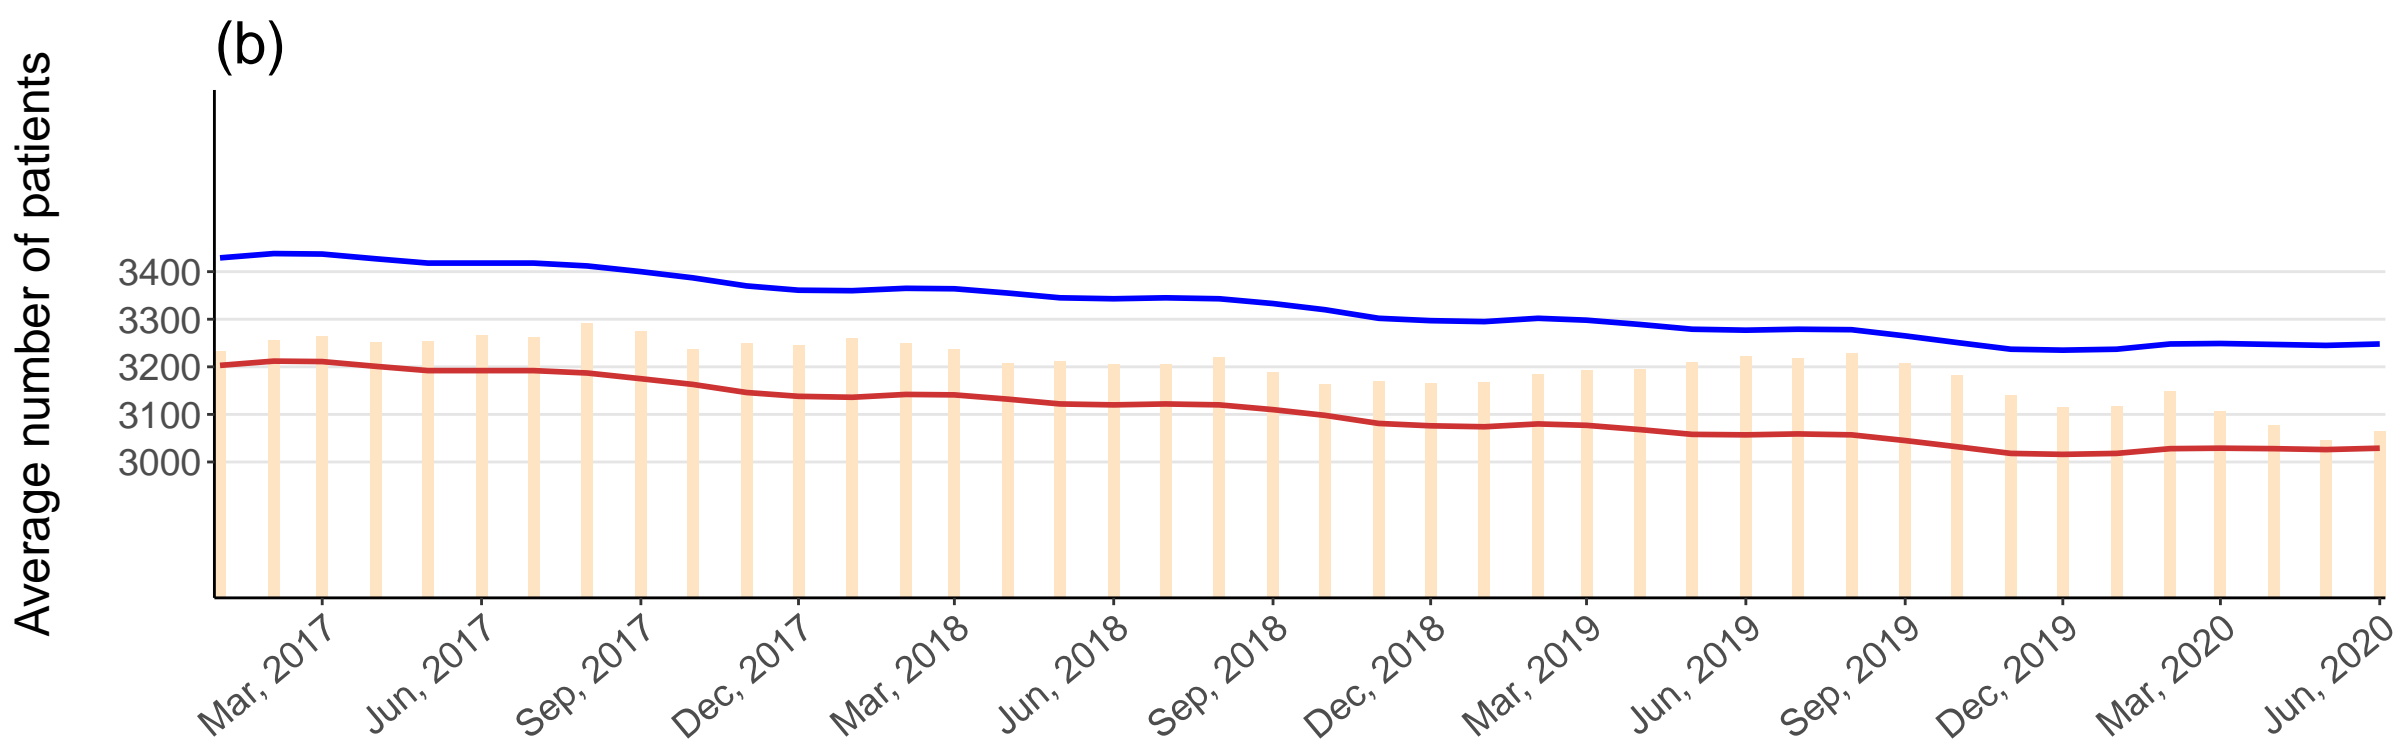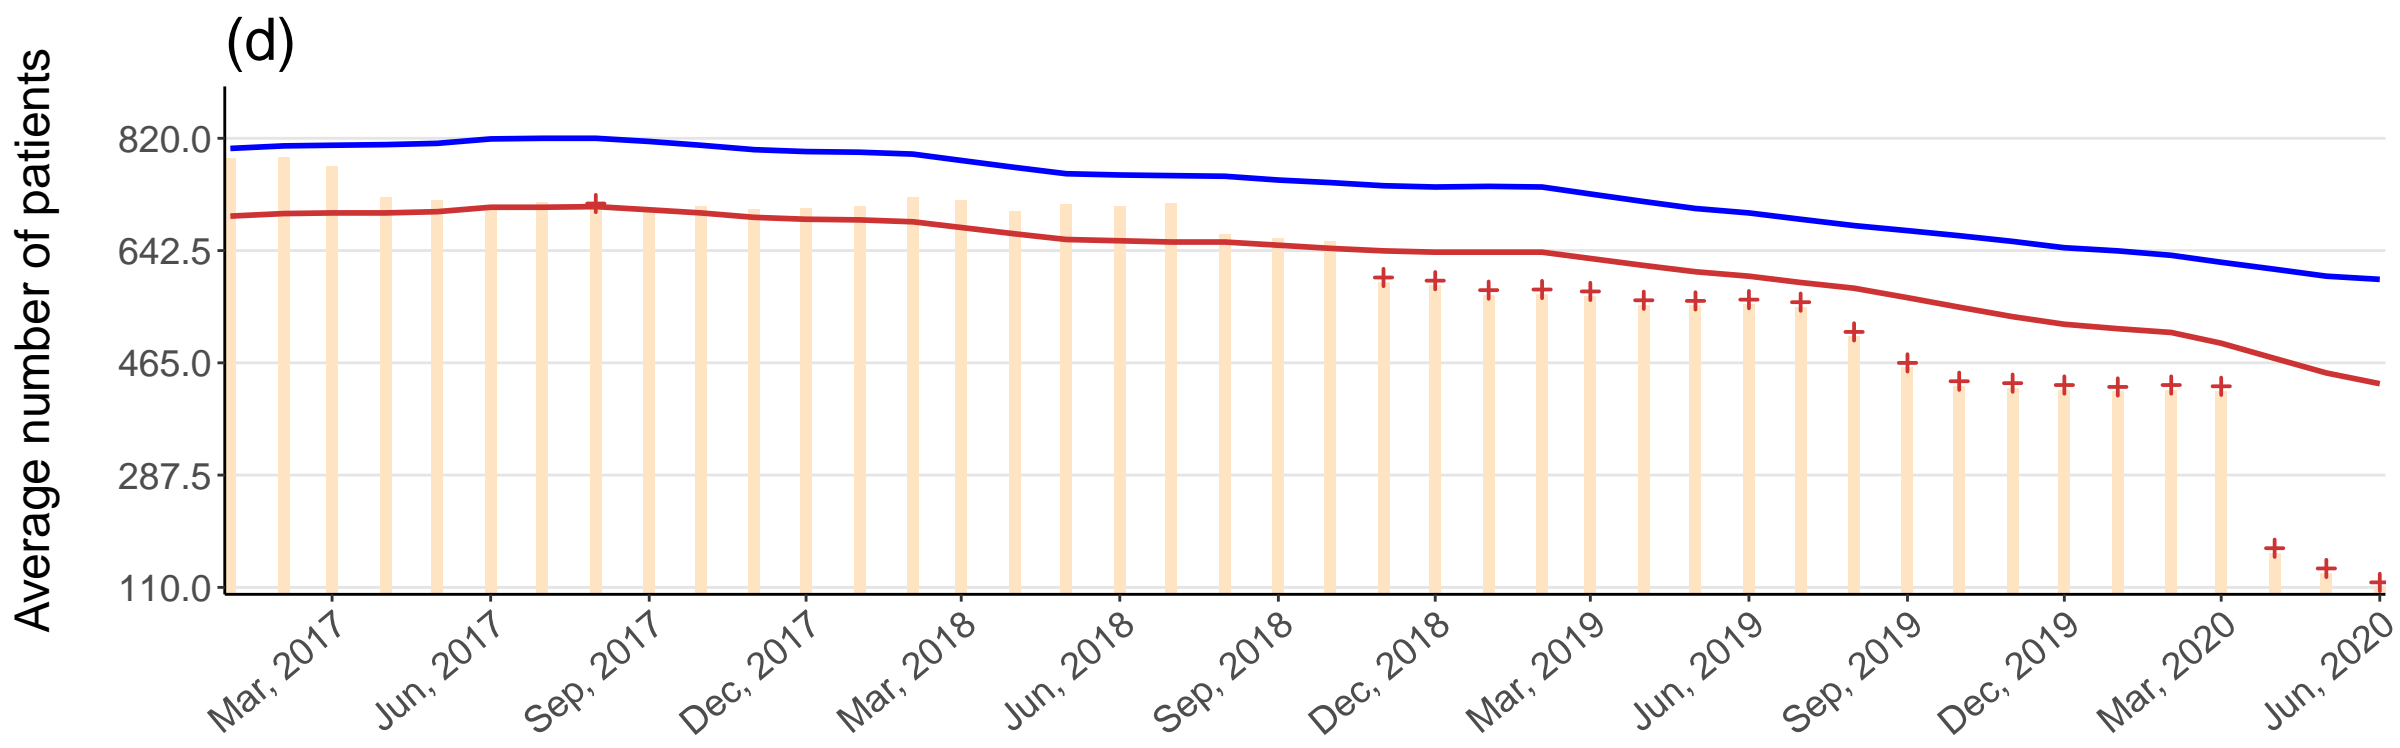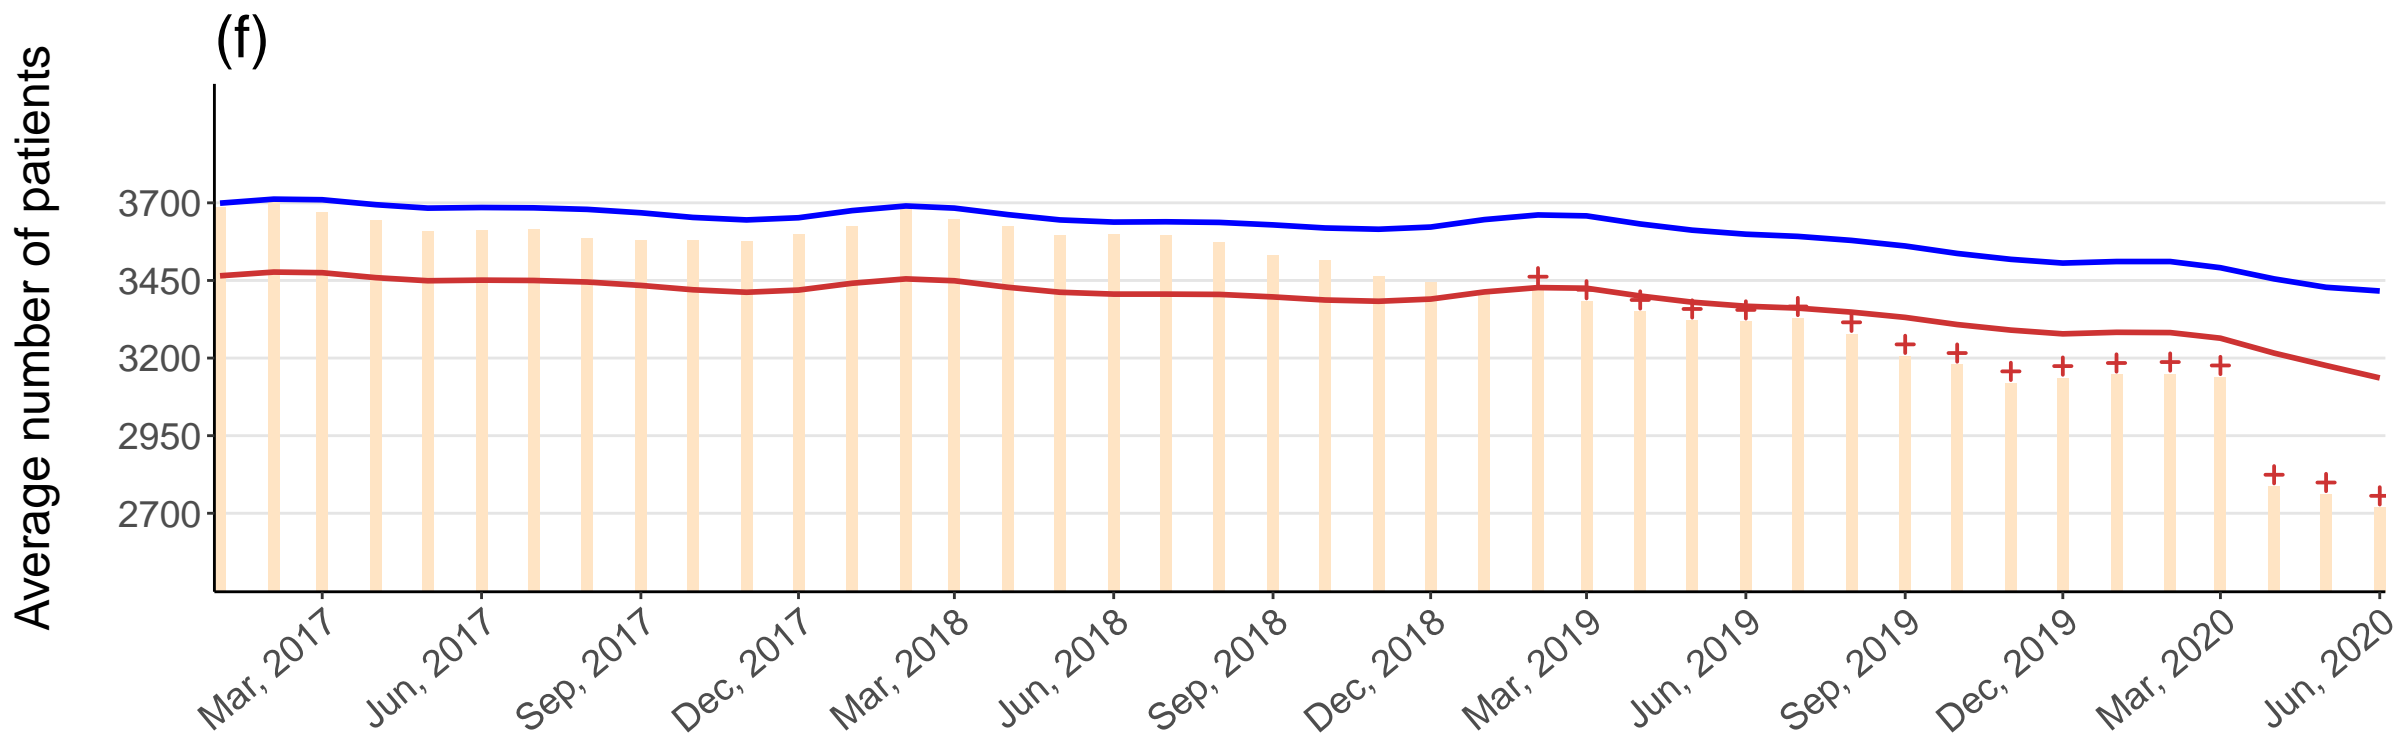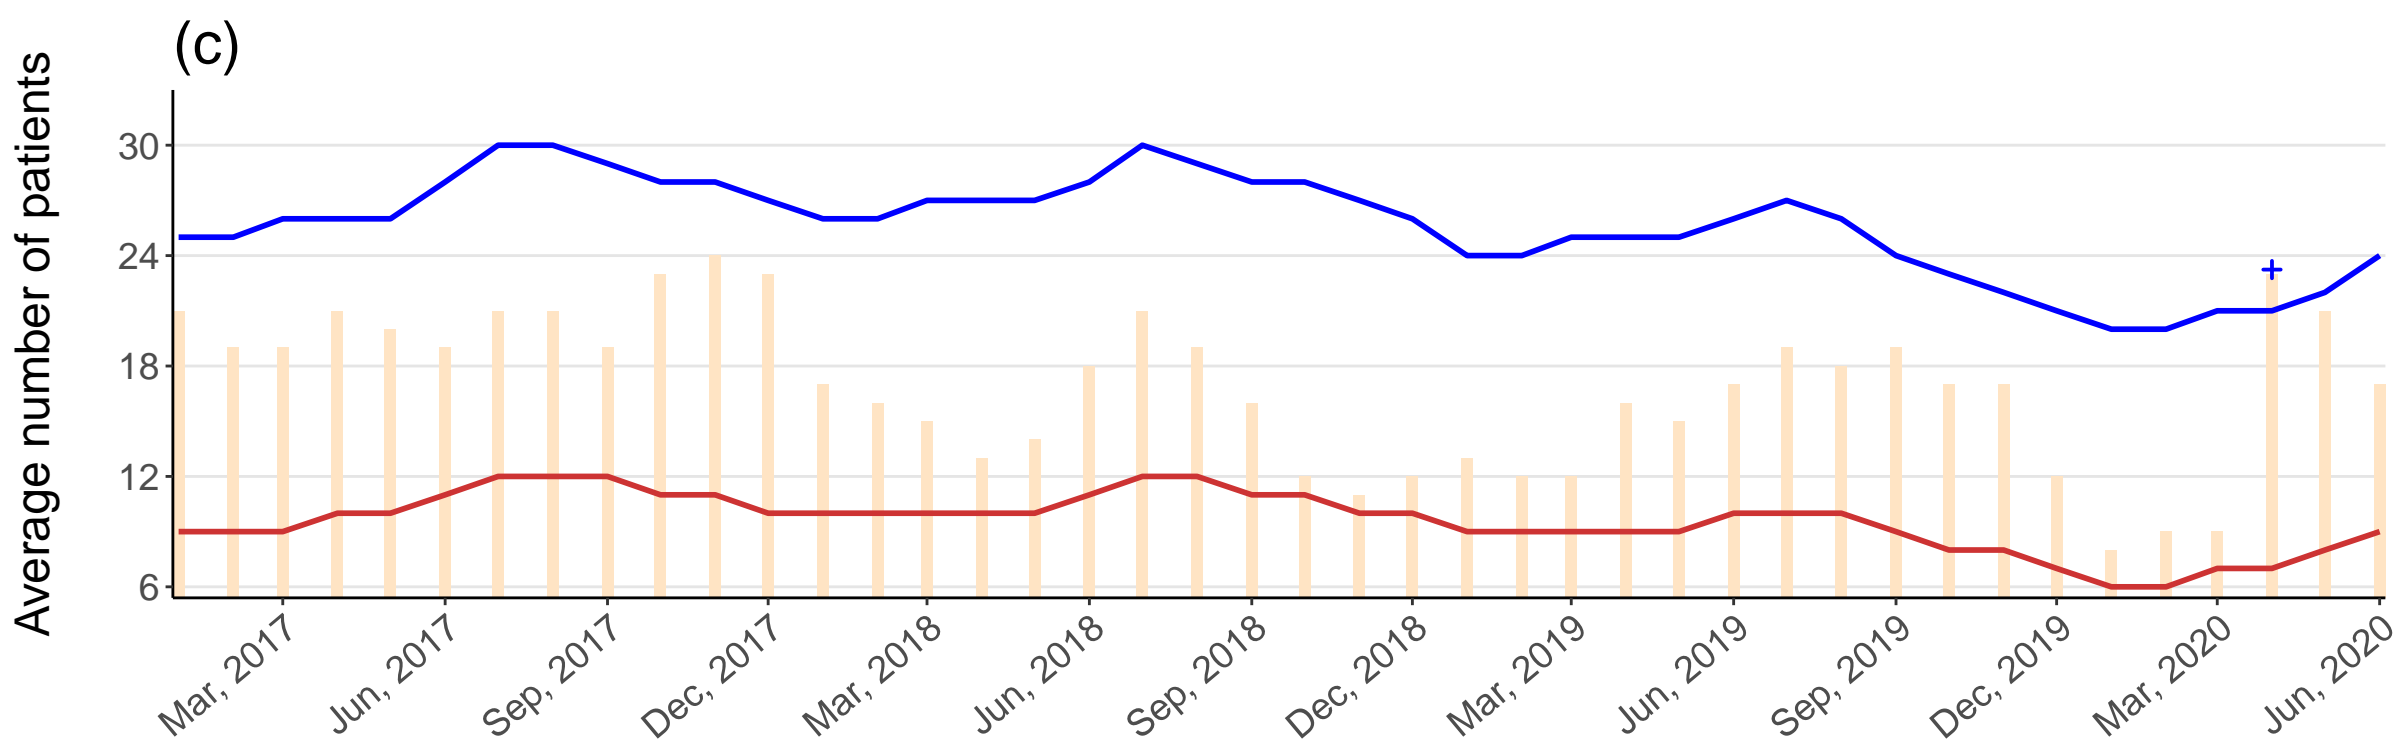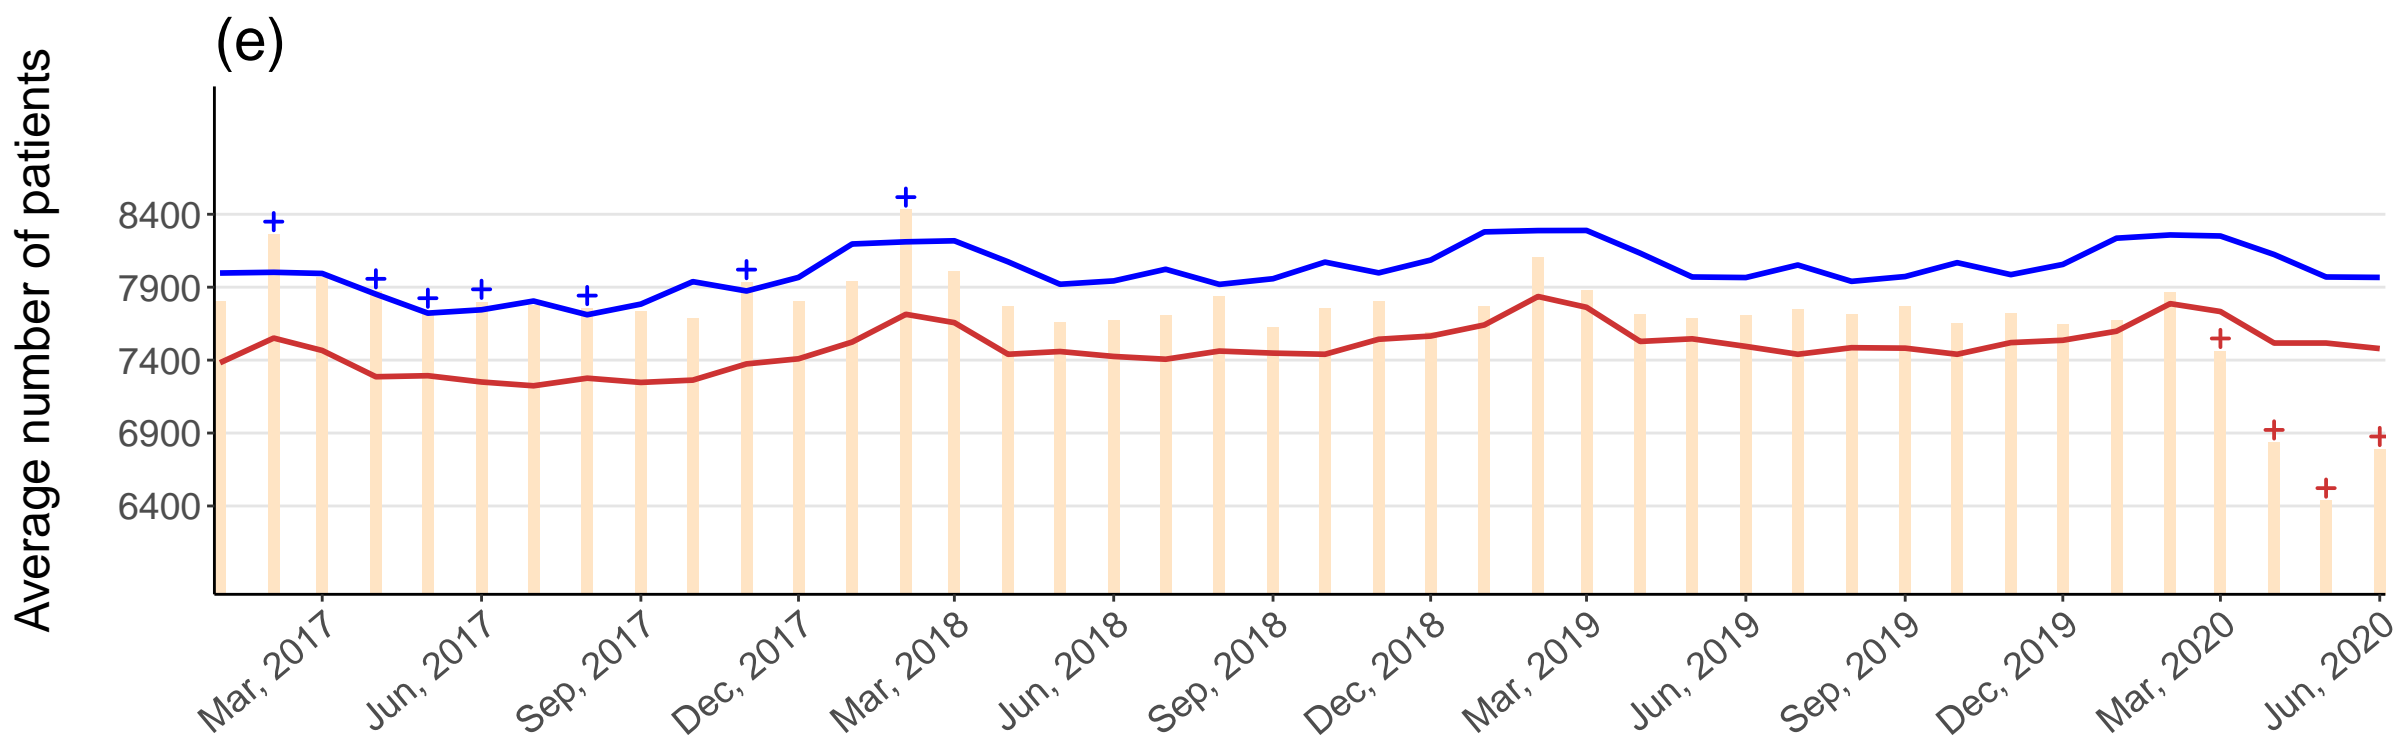

## Fukui

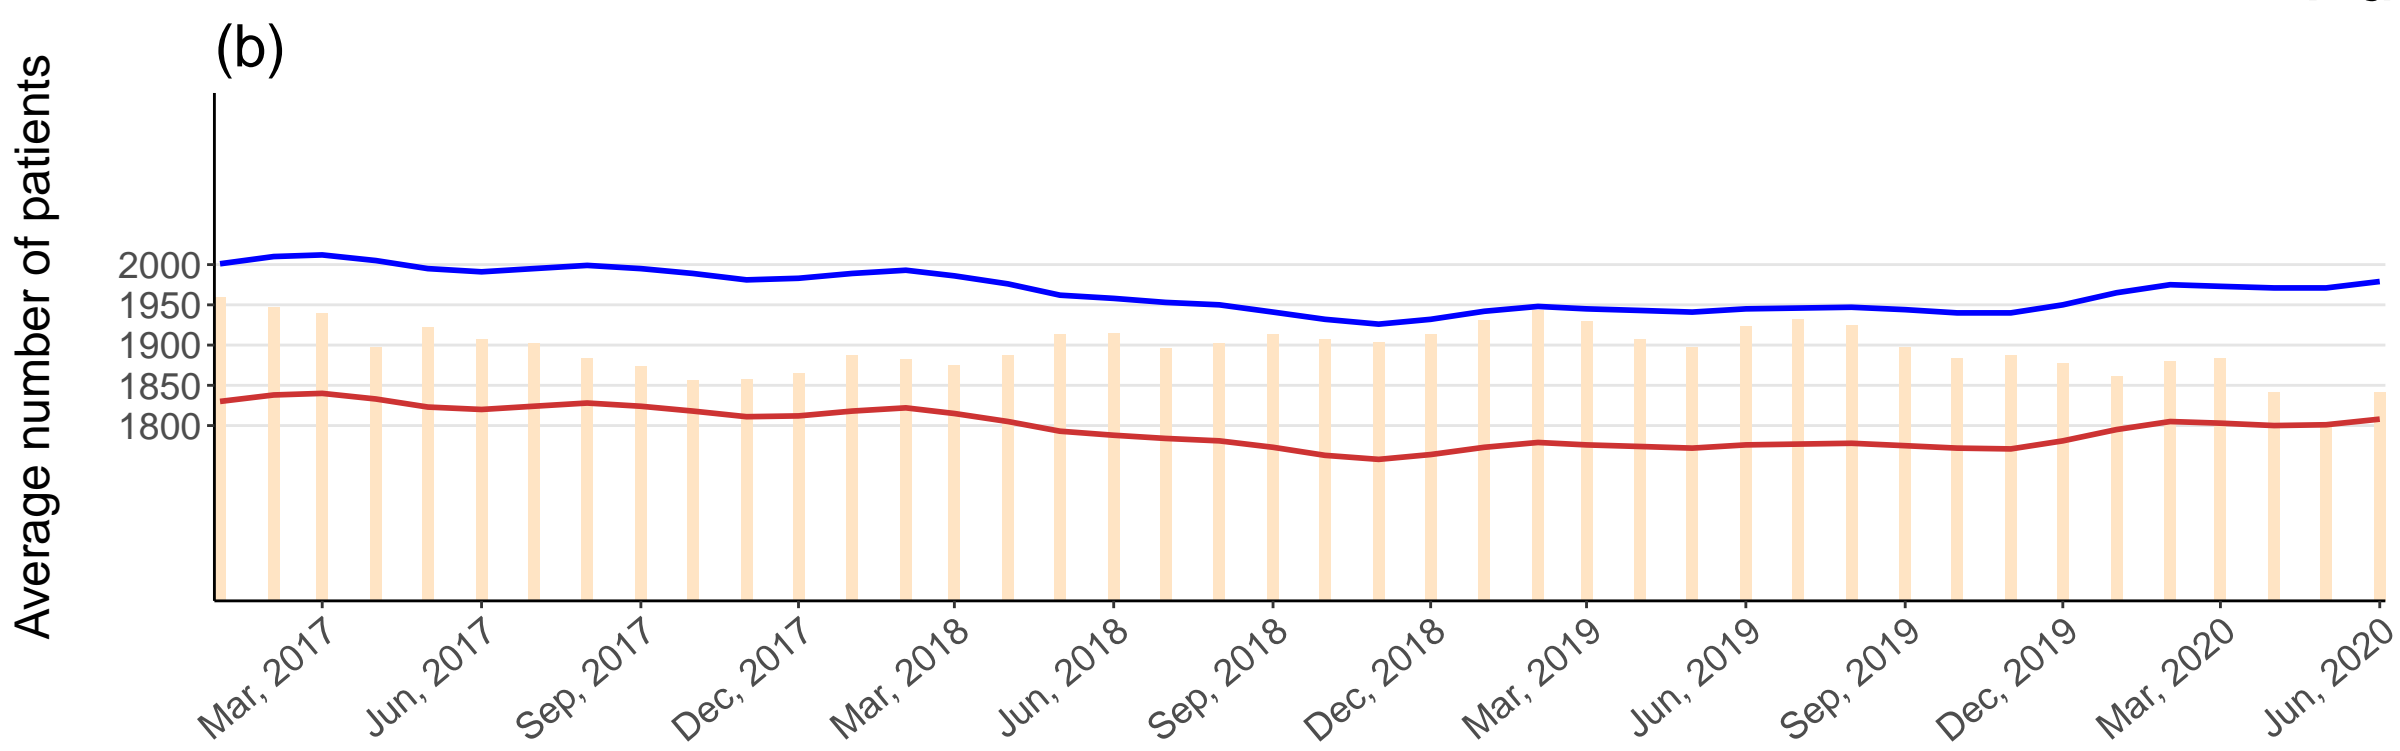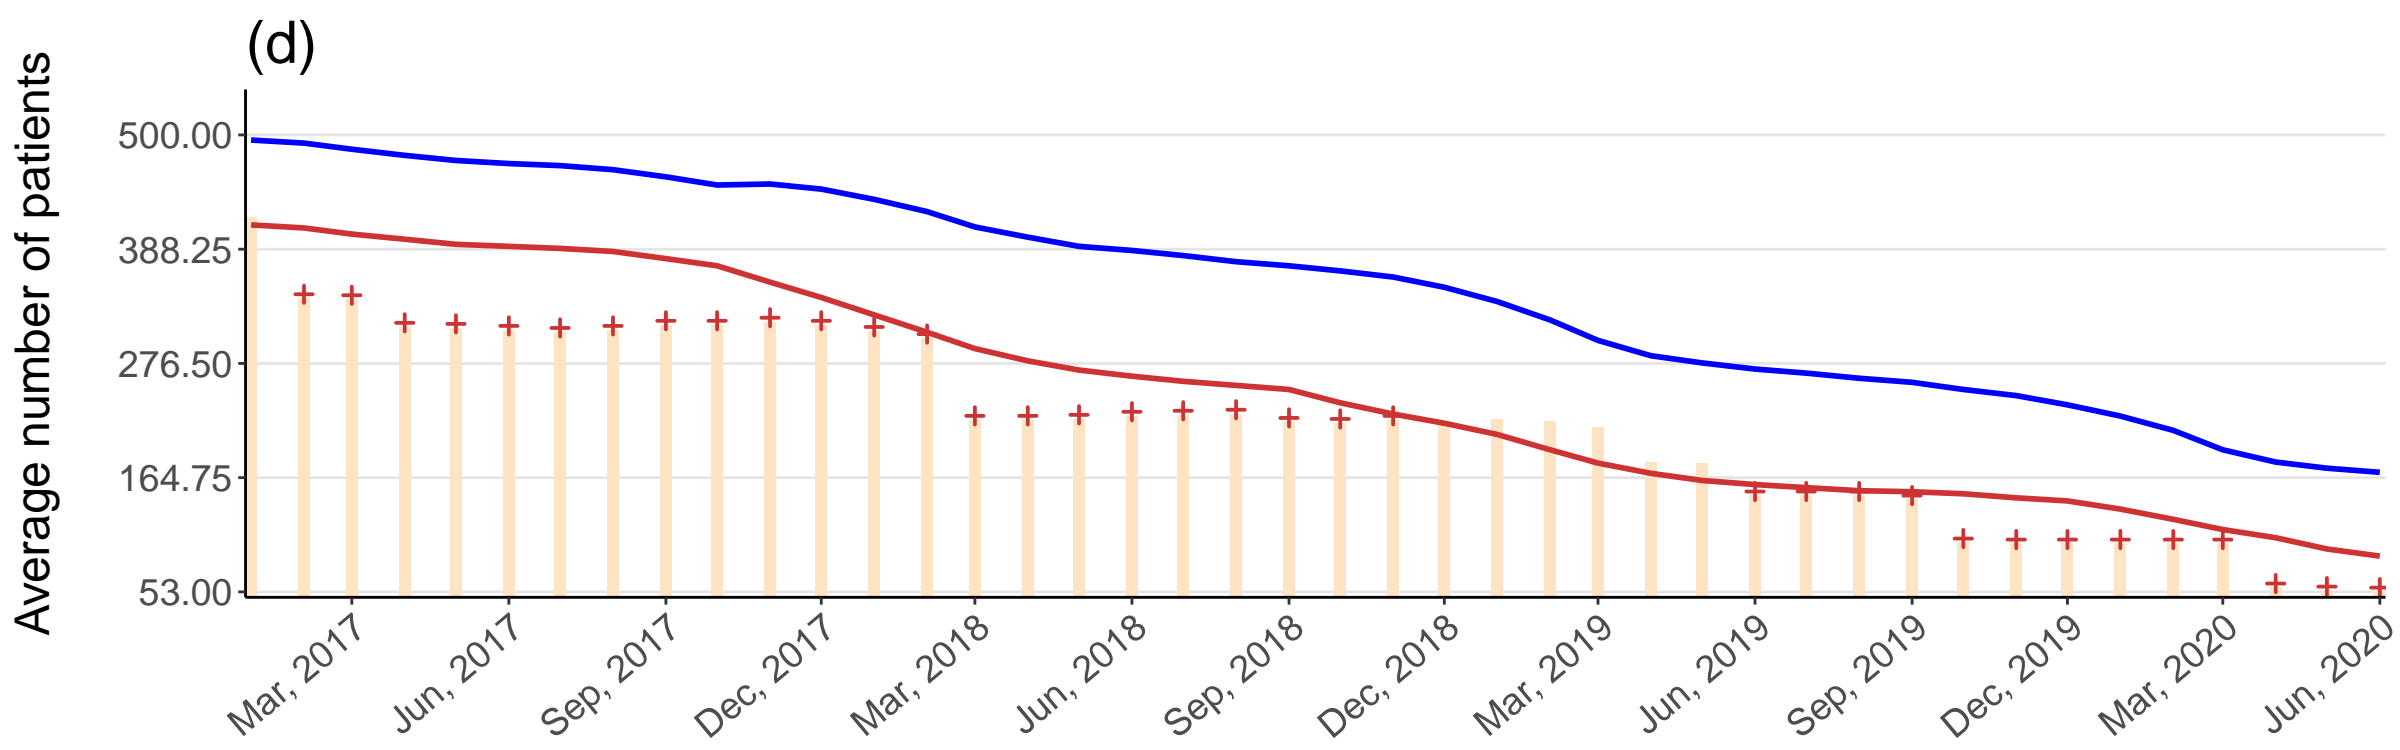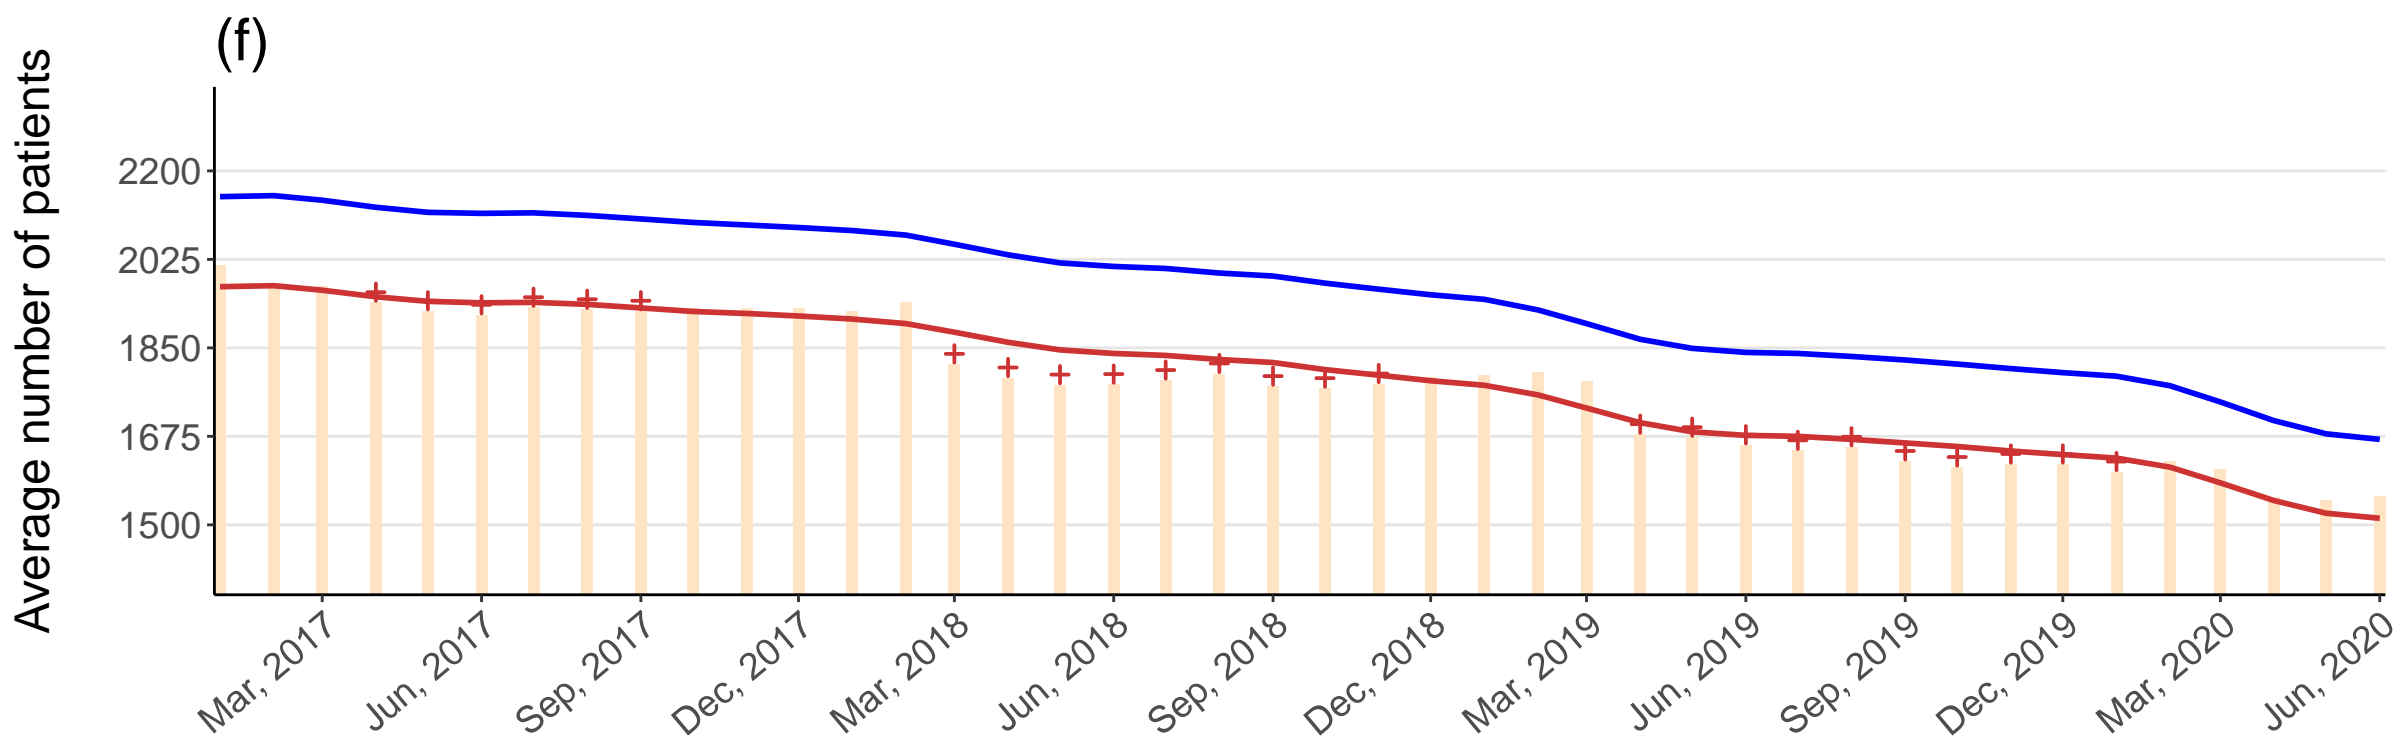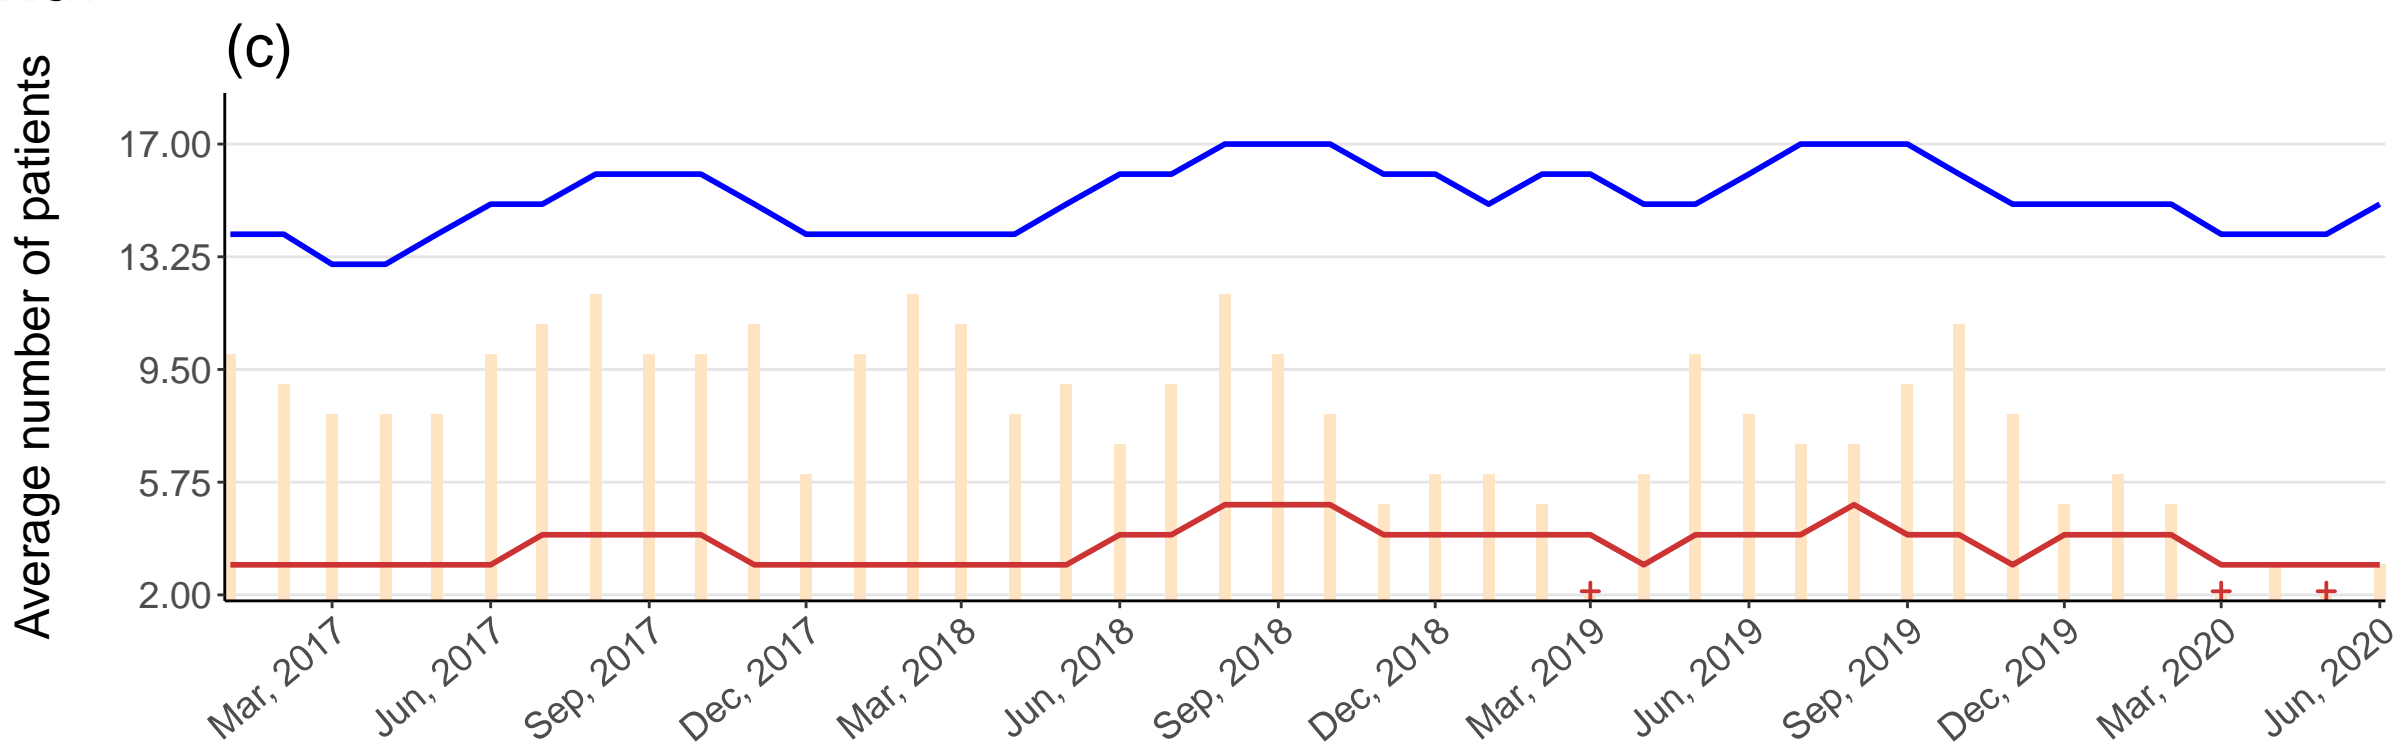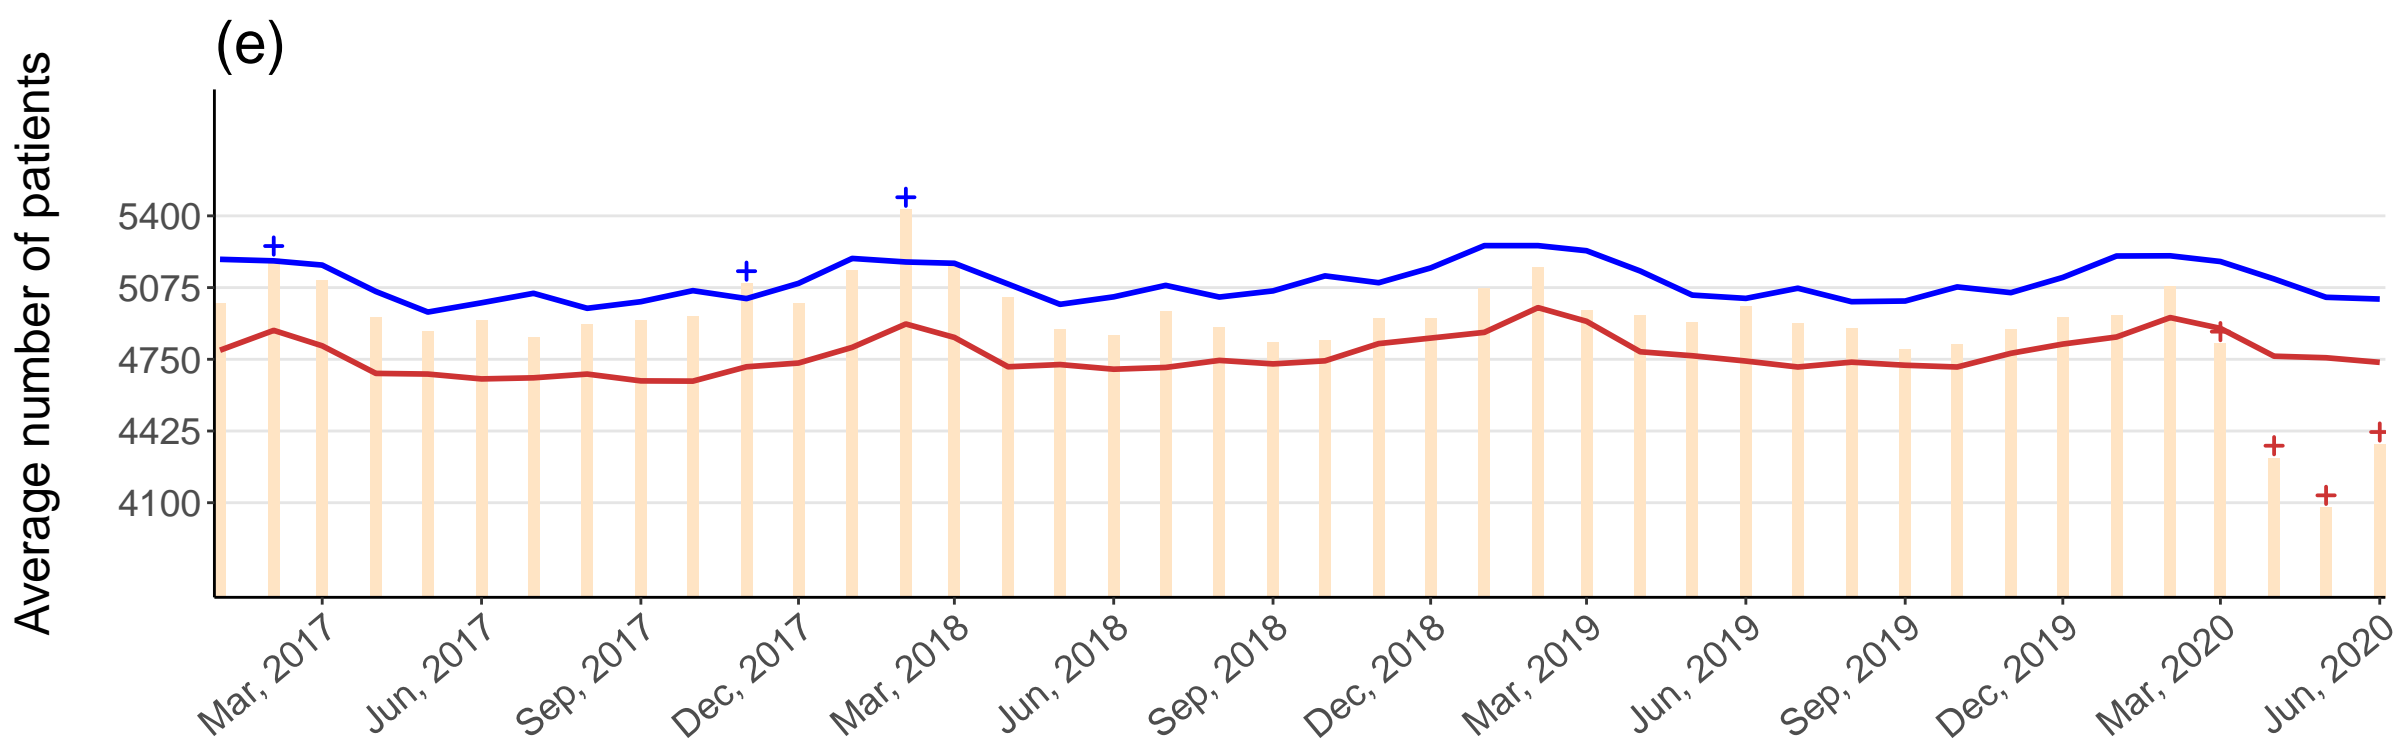



# Yamanashi

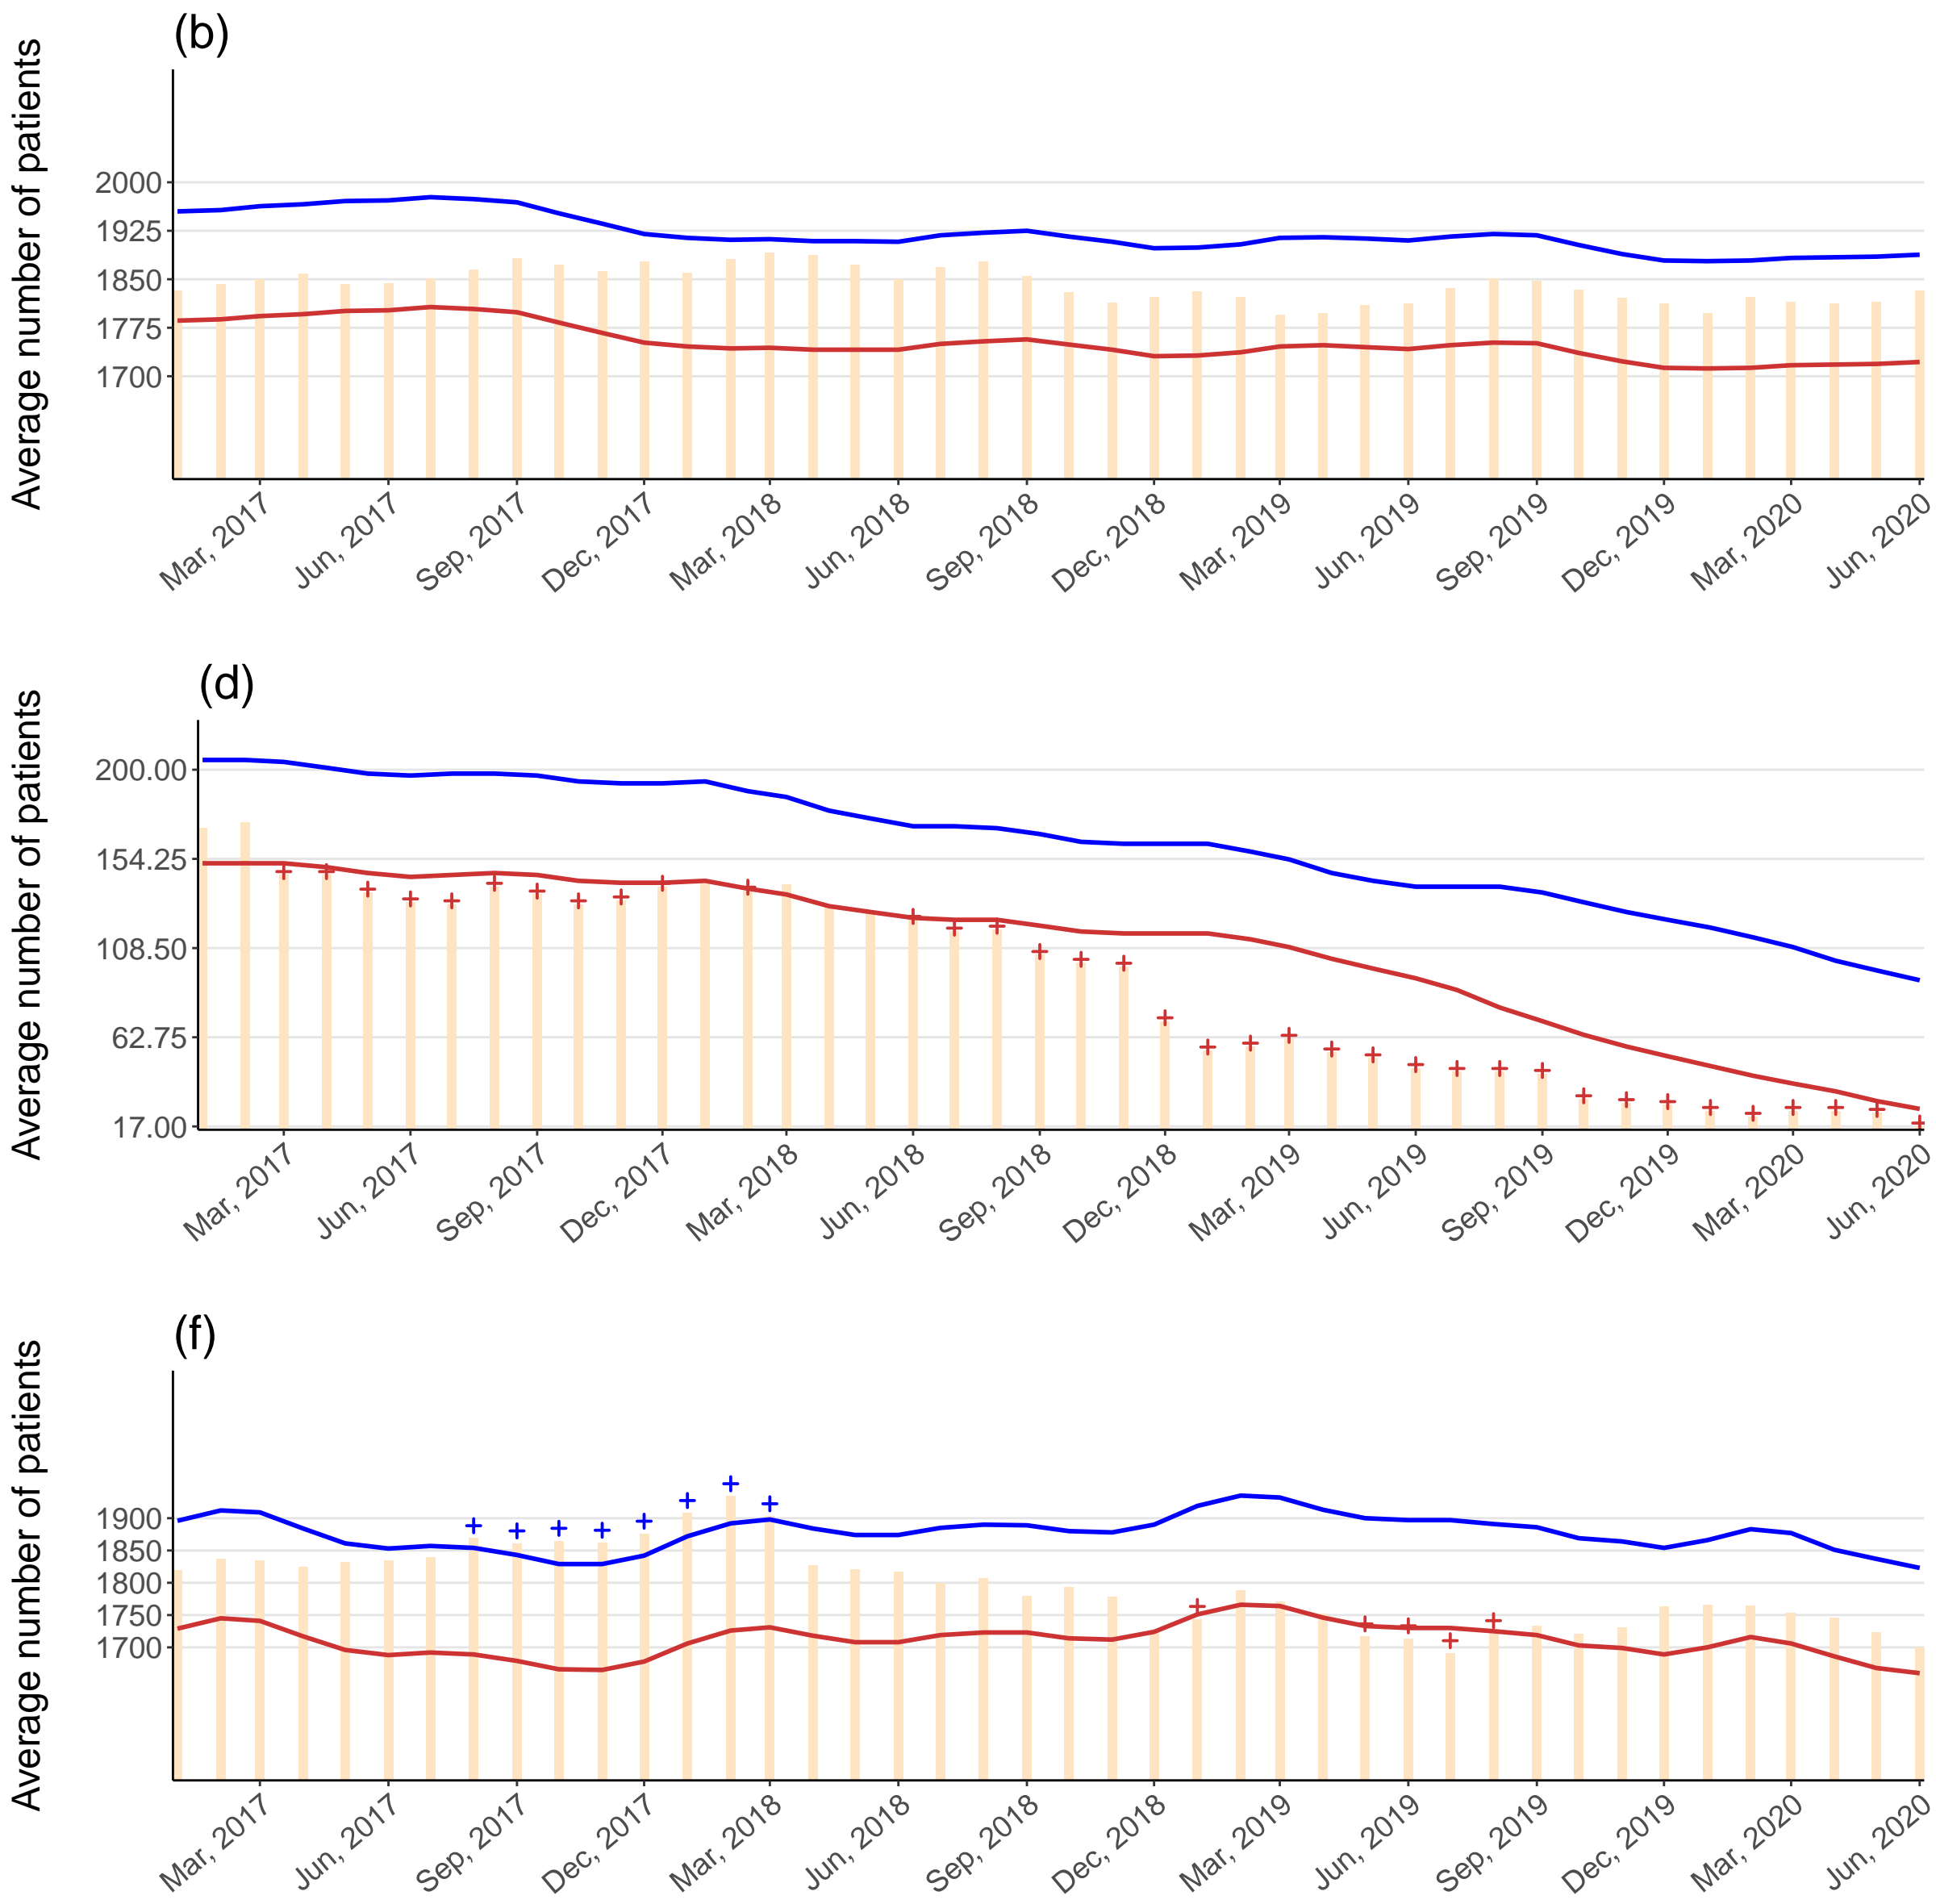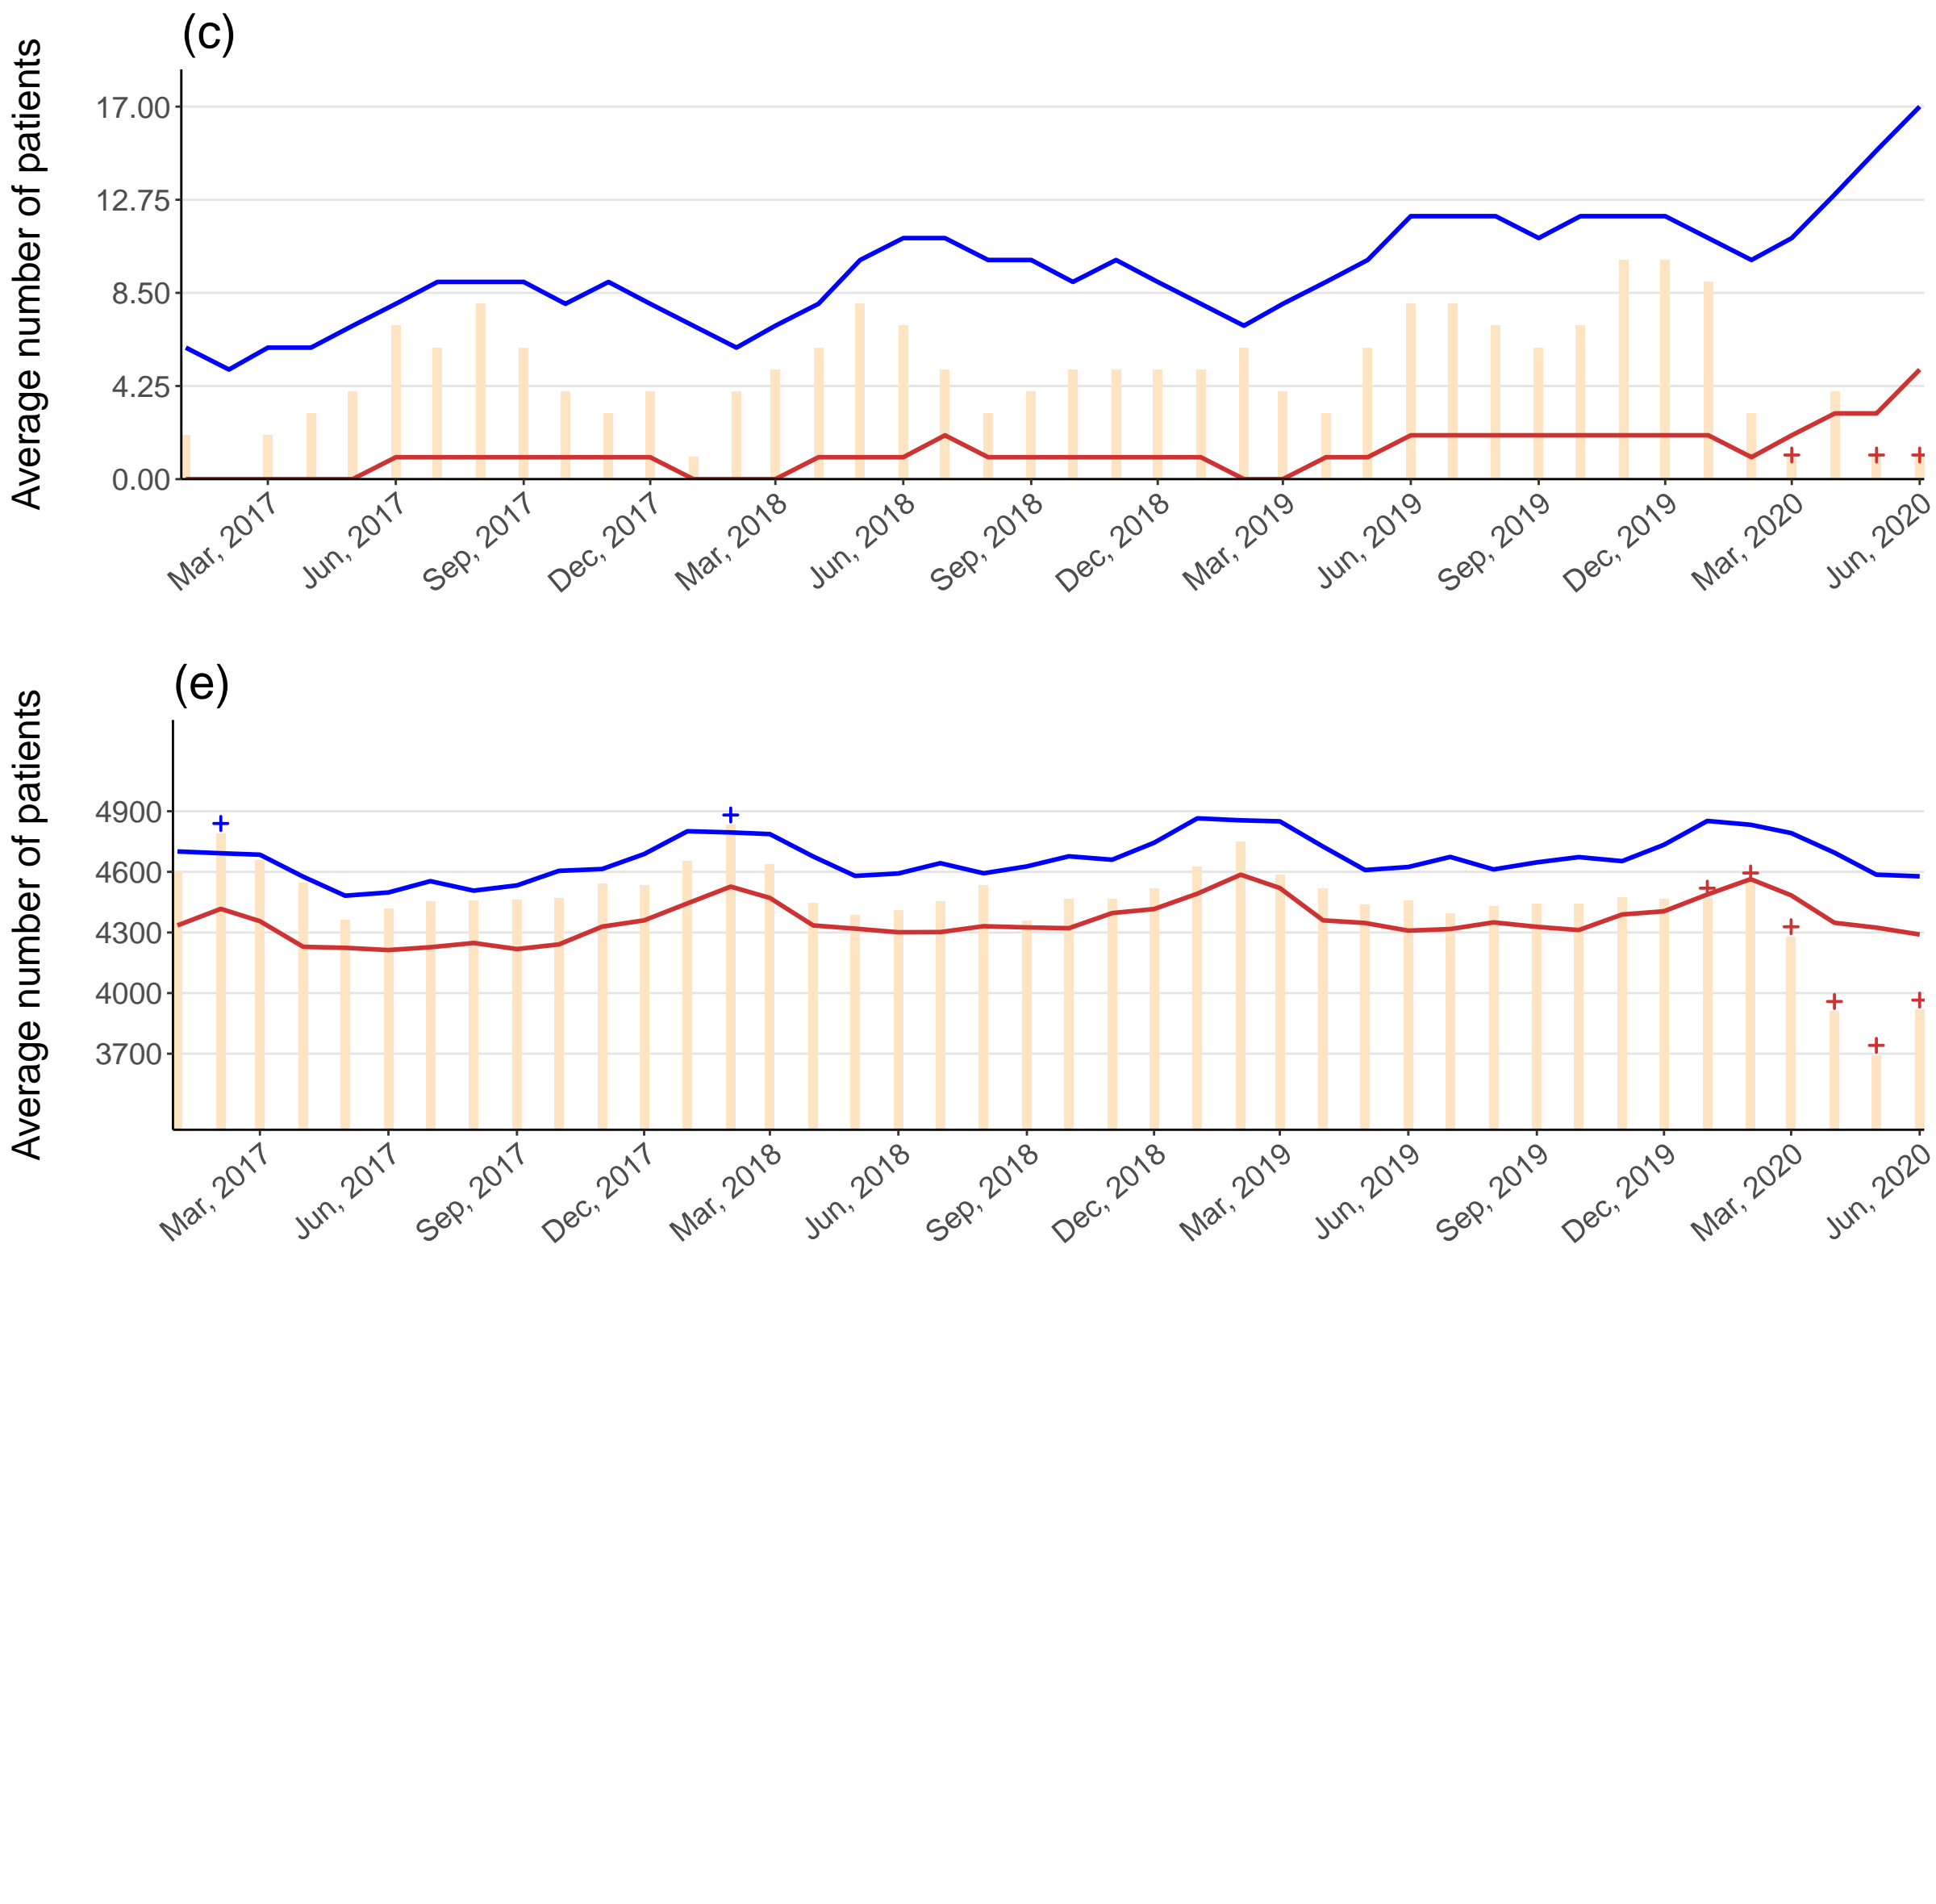

## Nagano

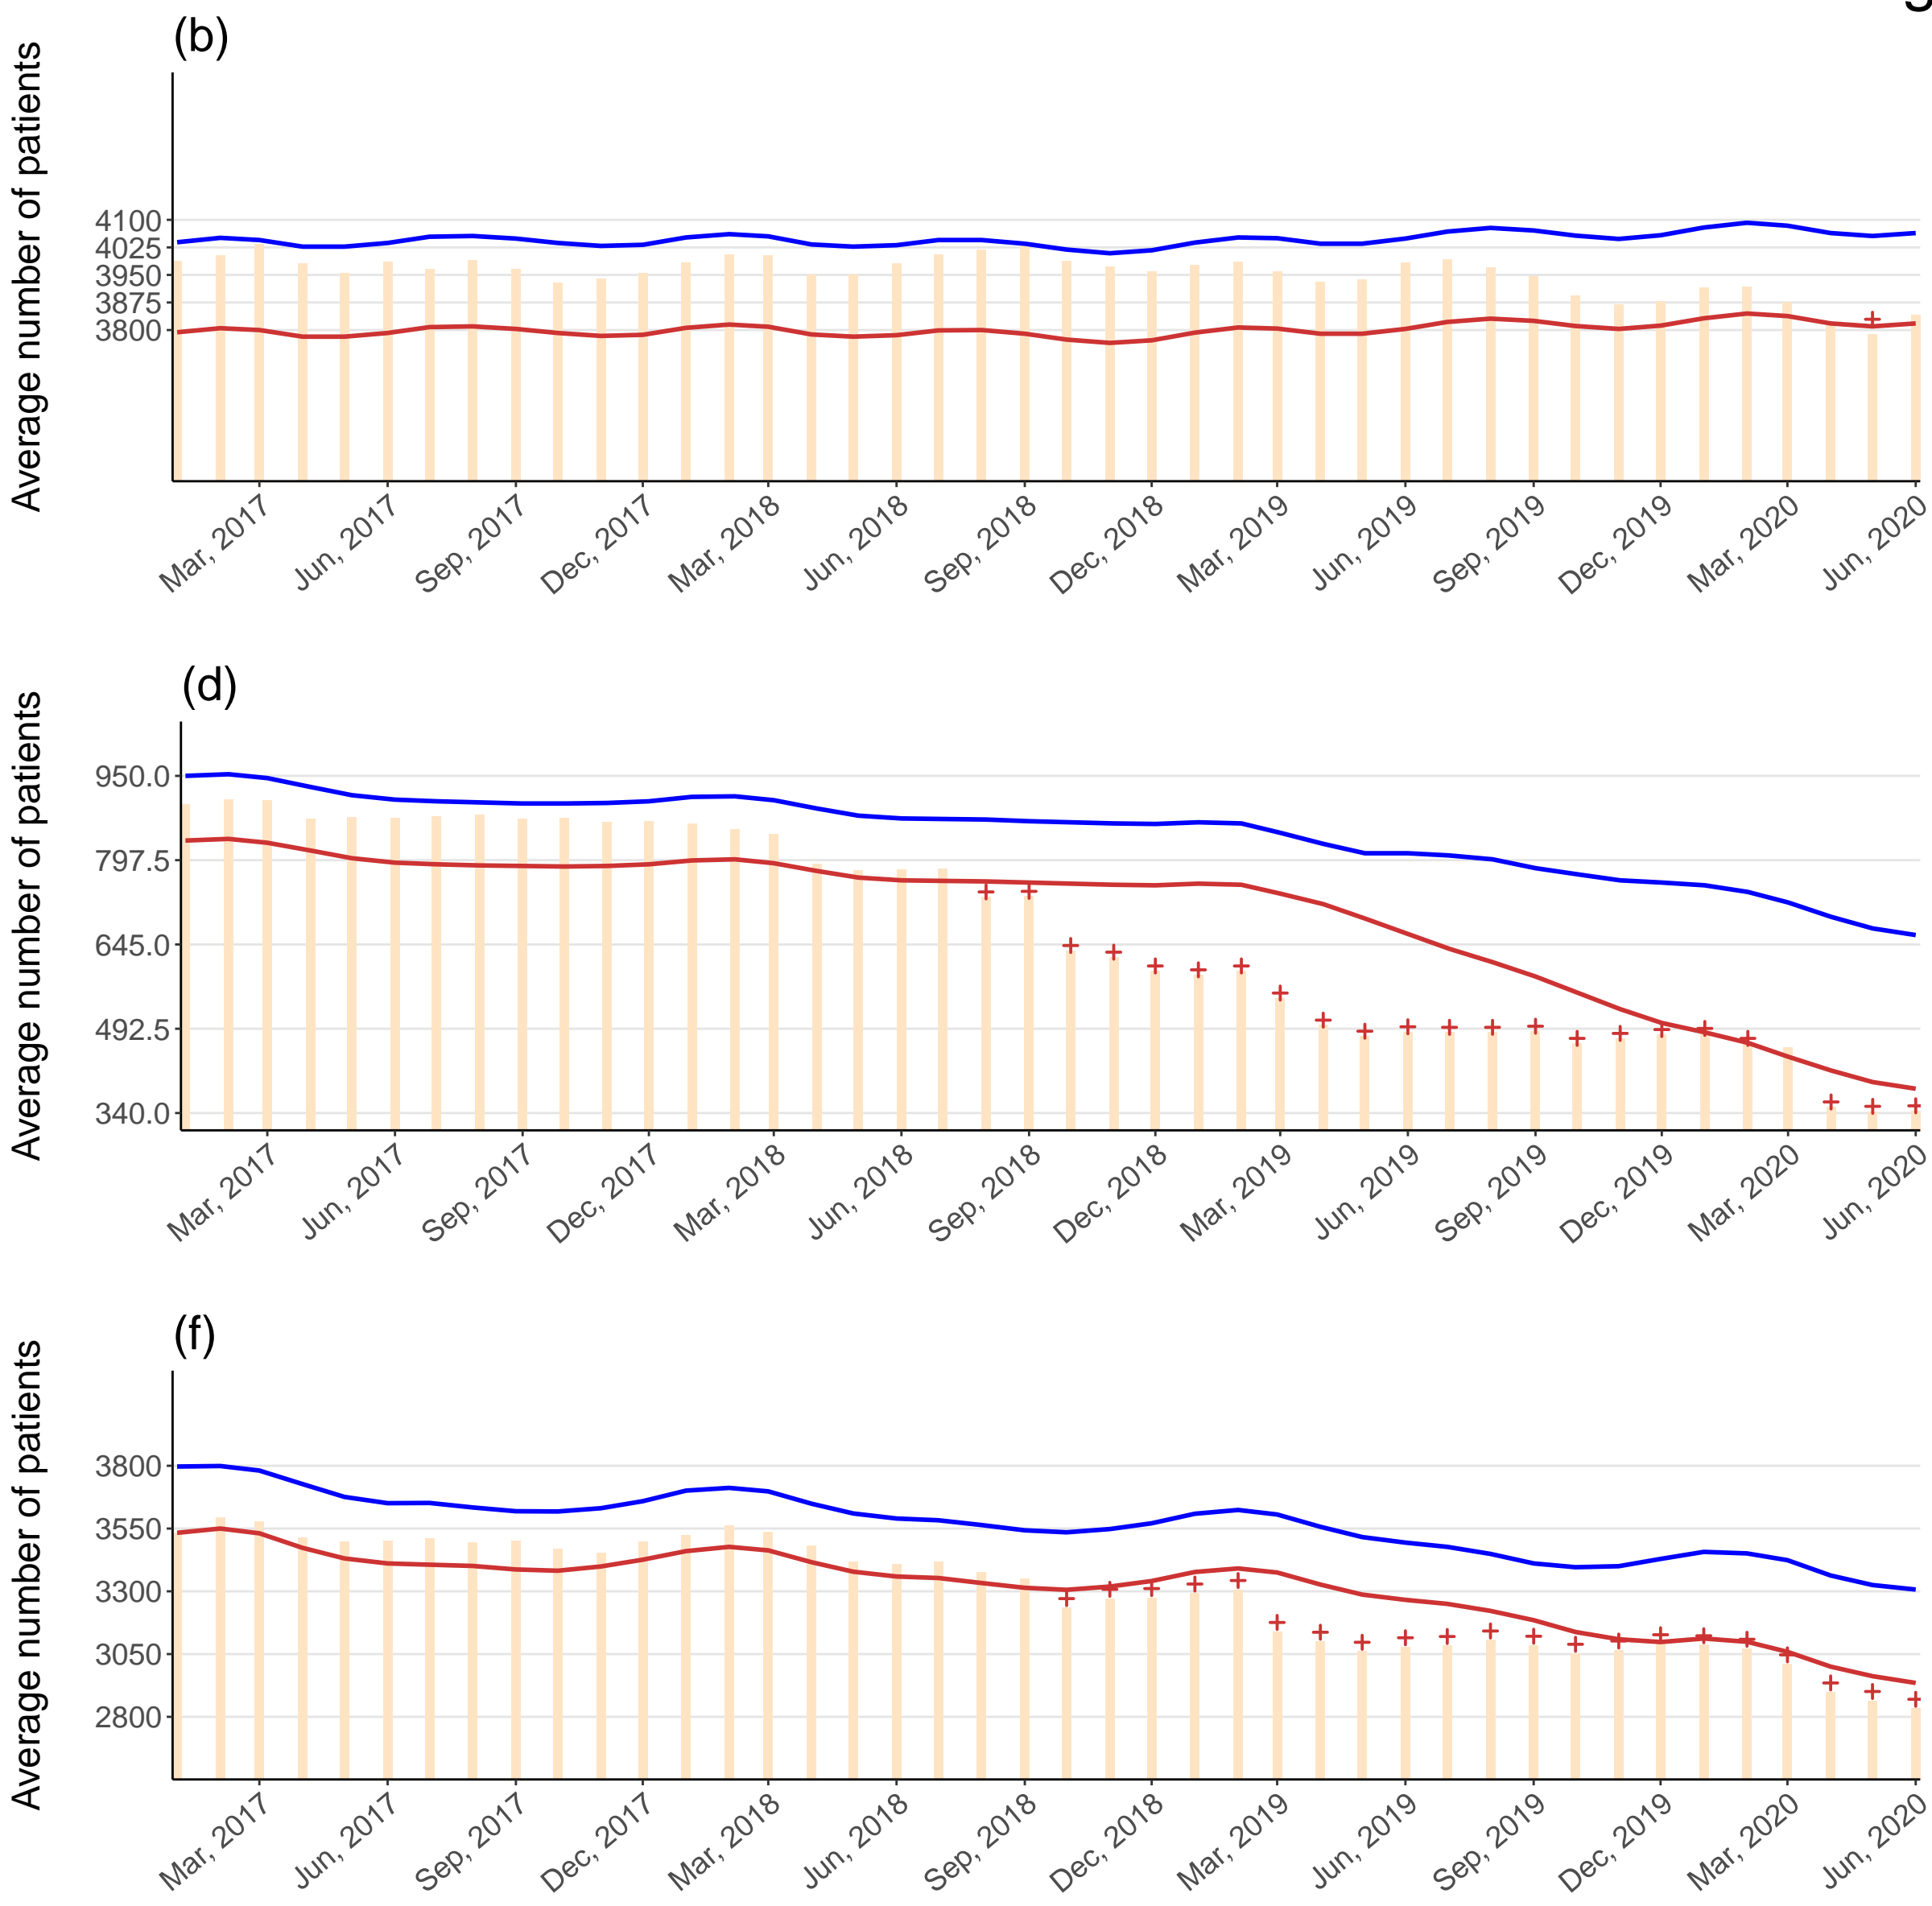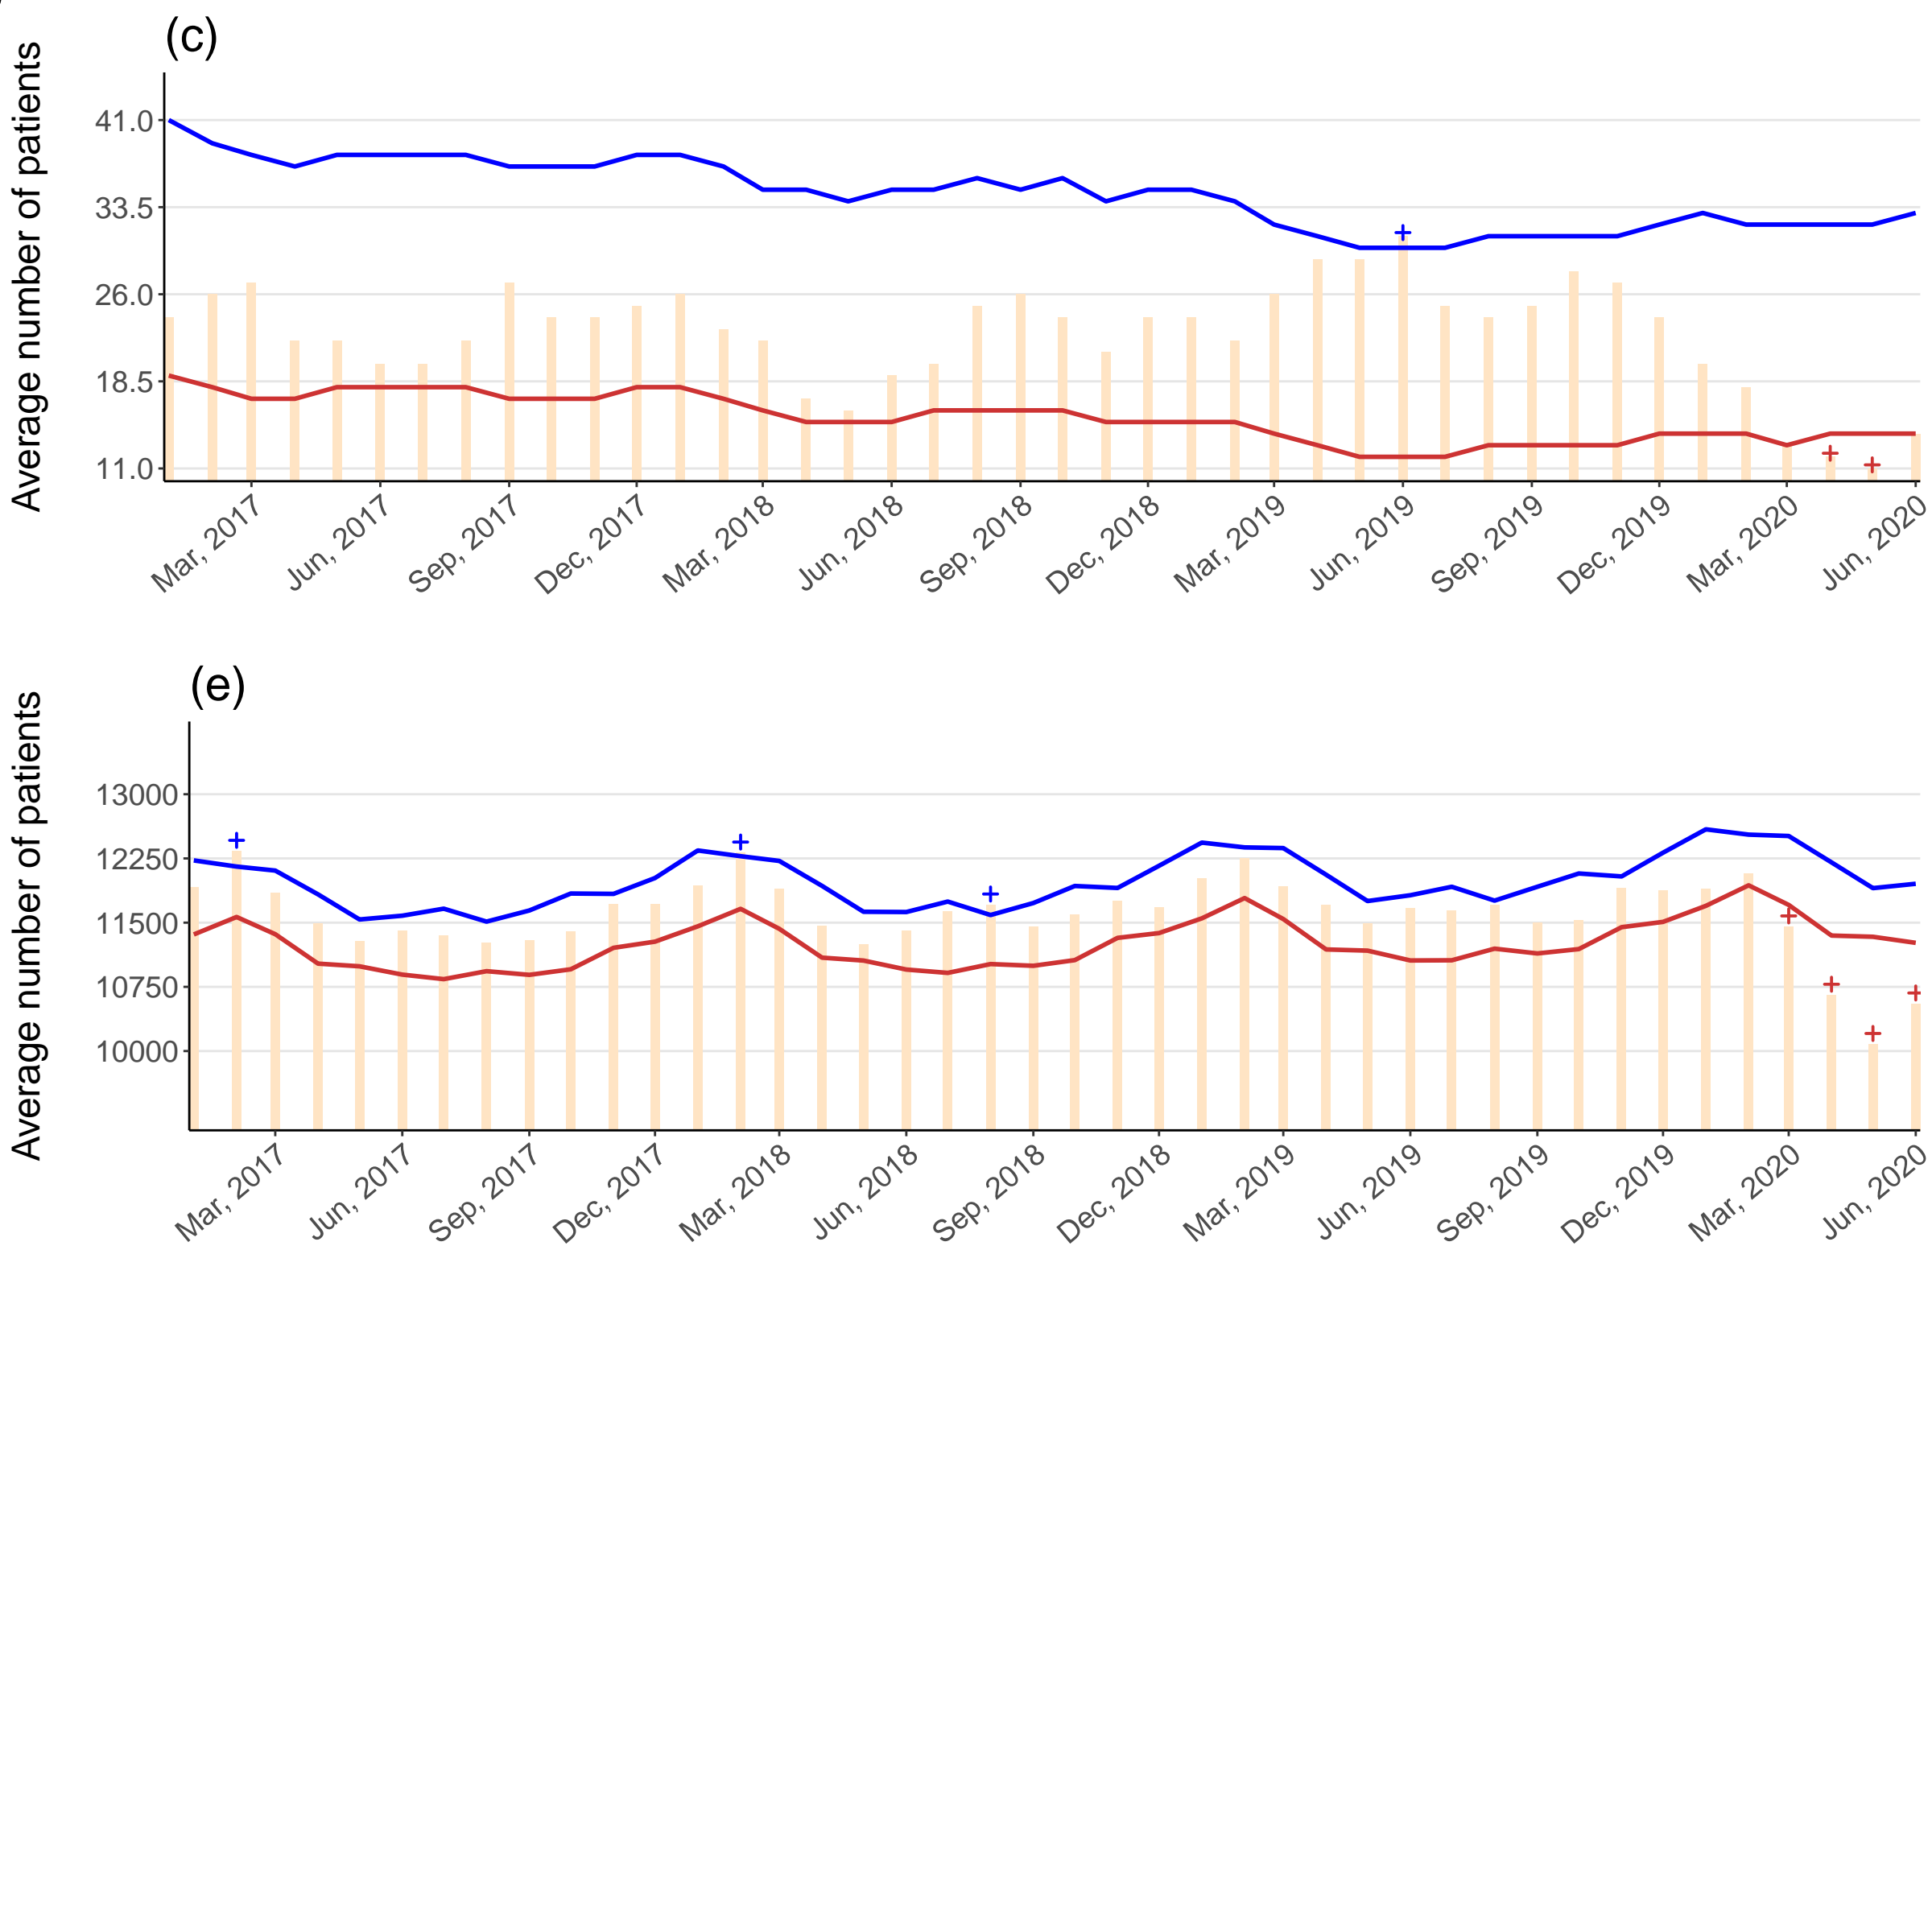

## Gifu

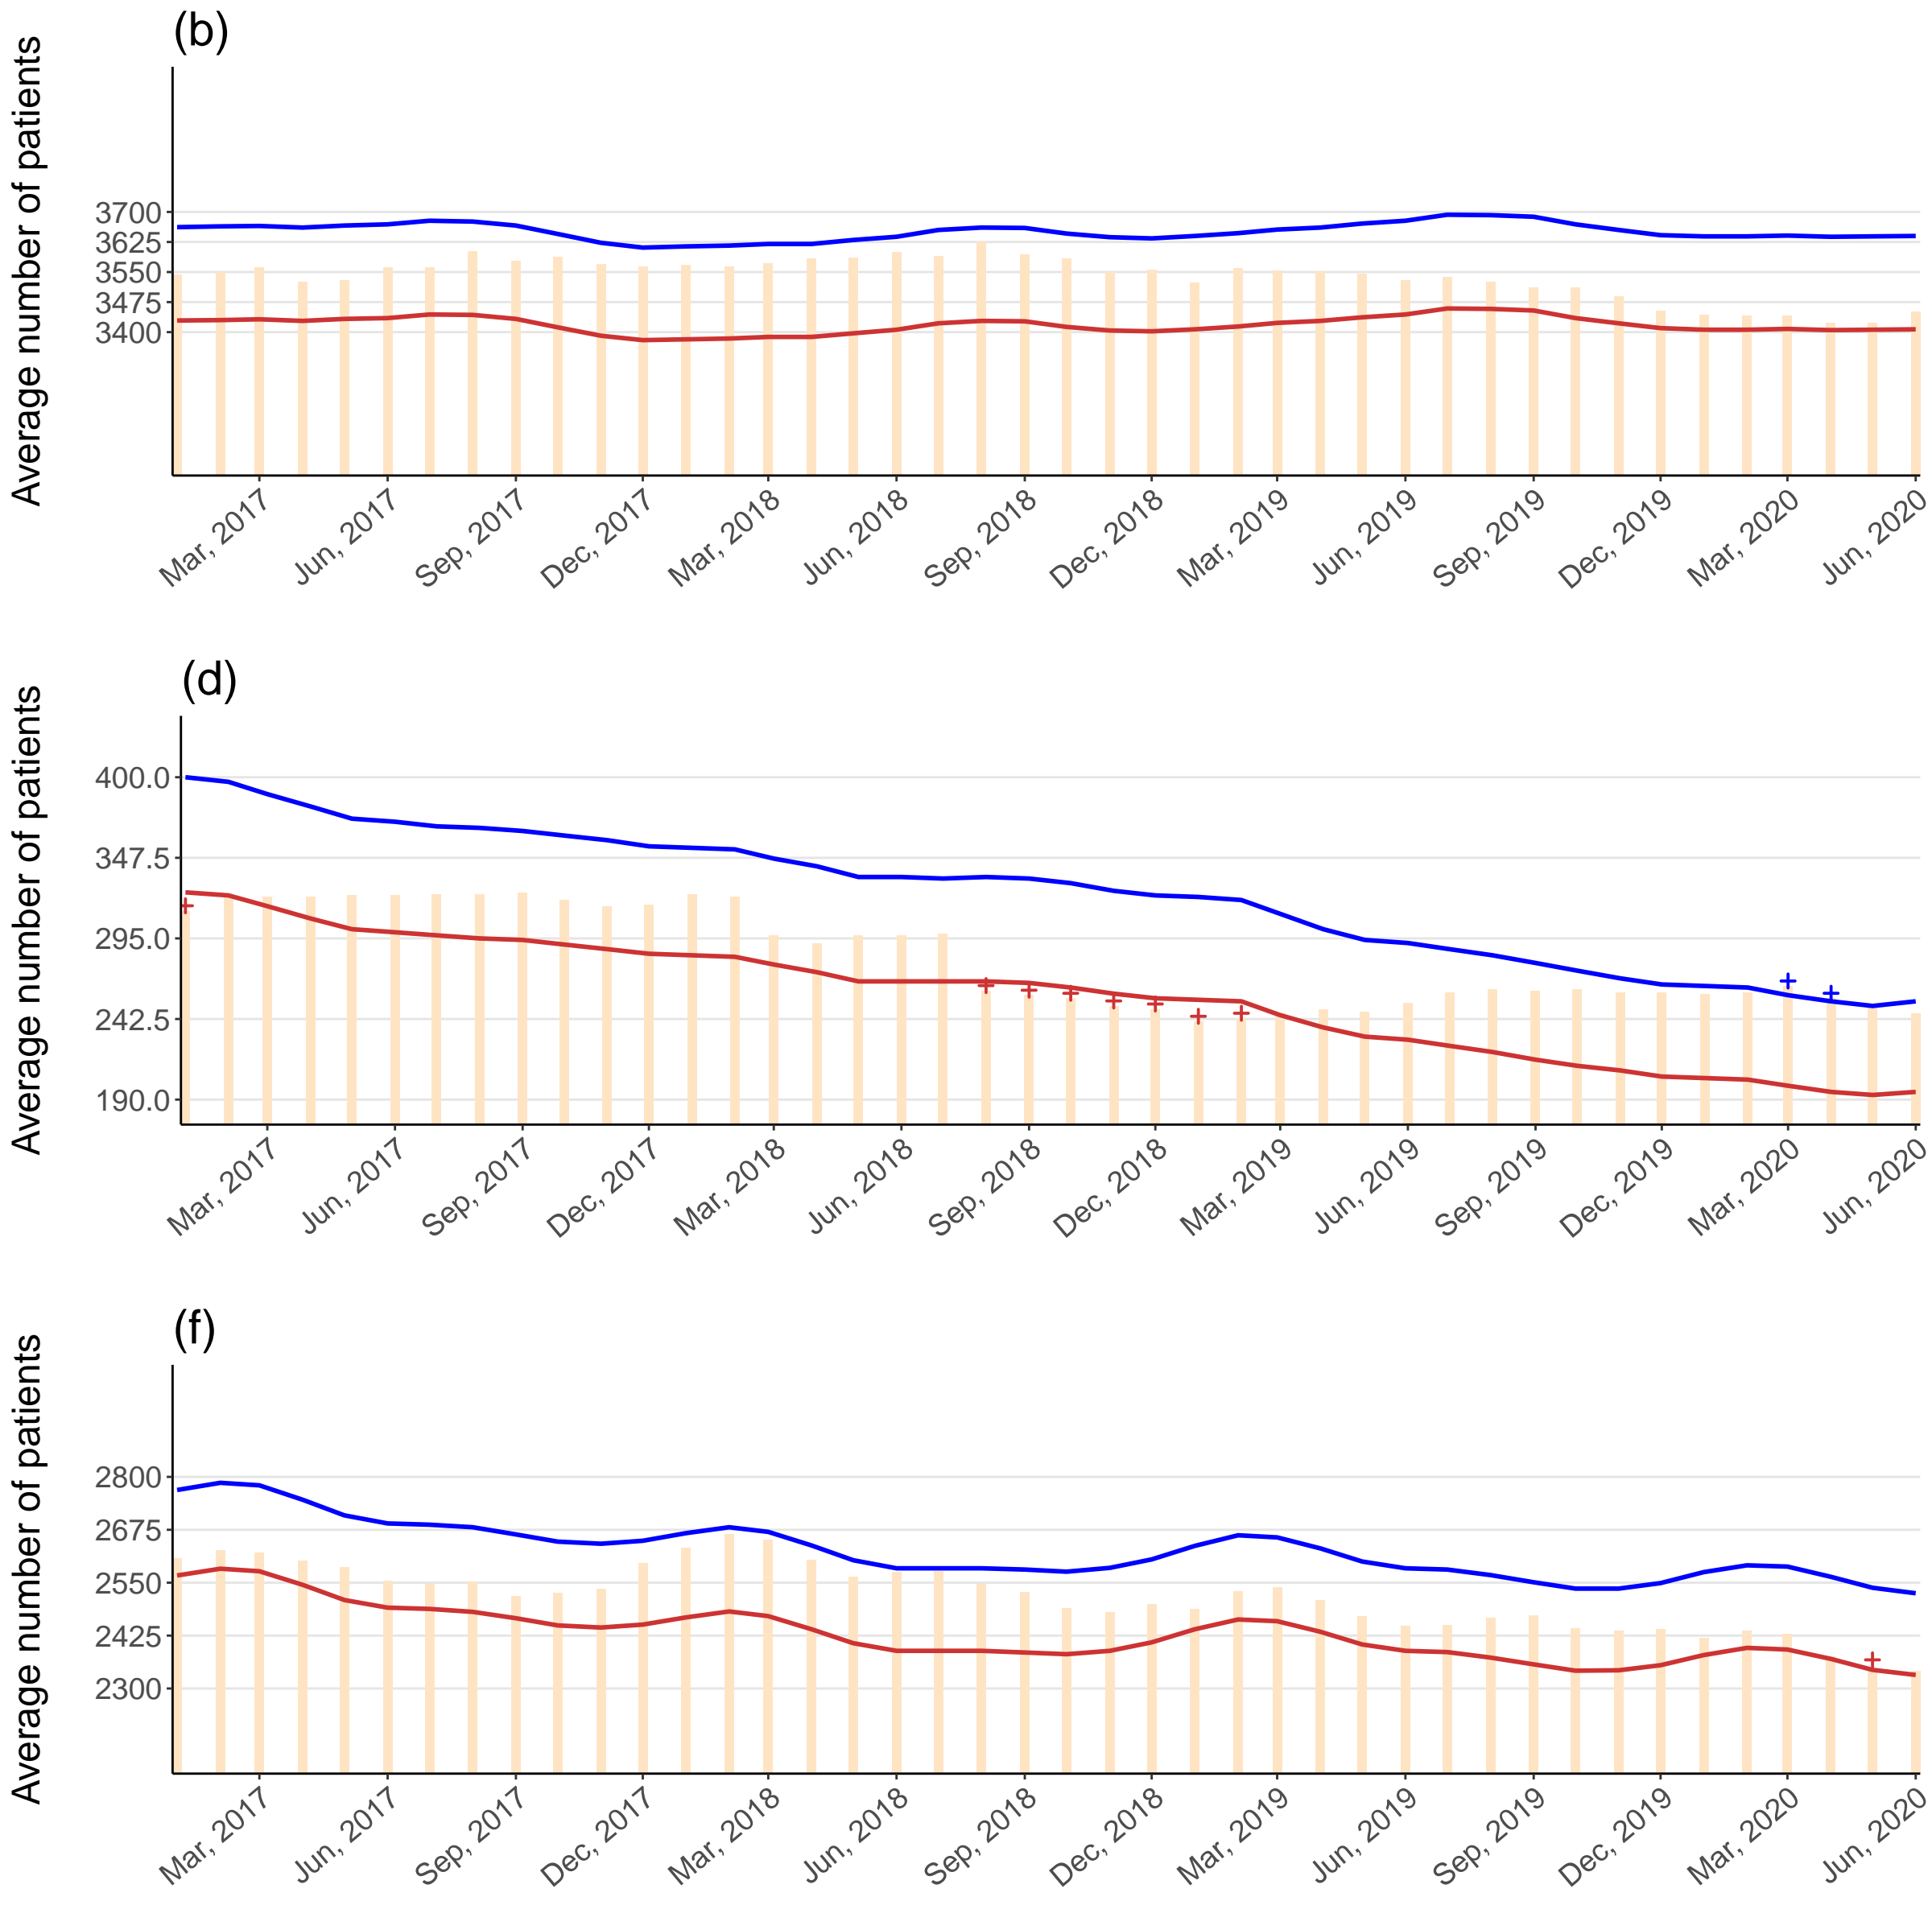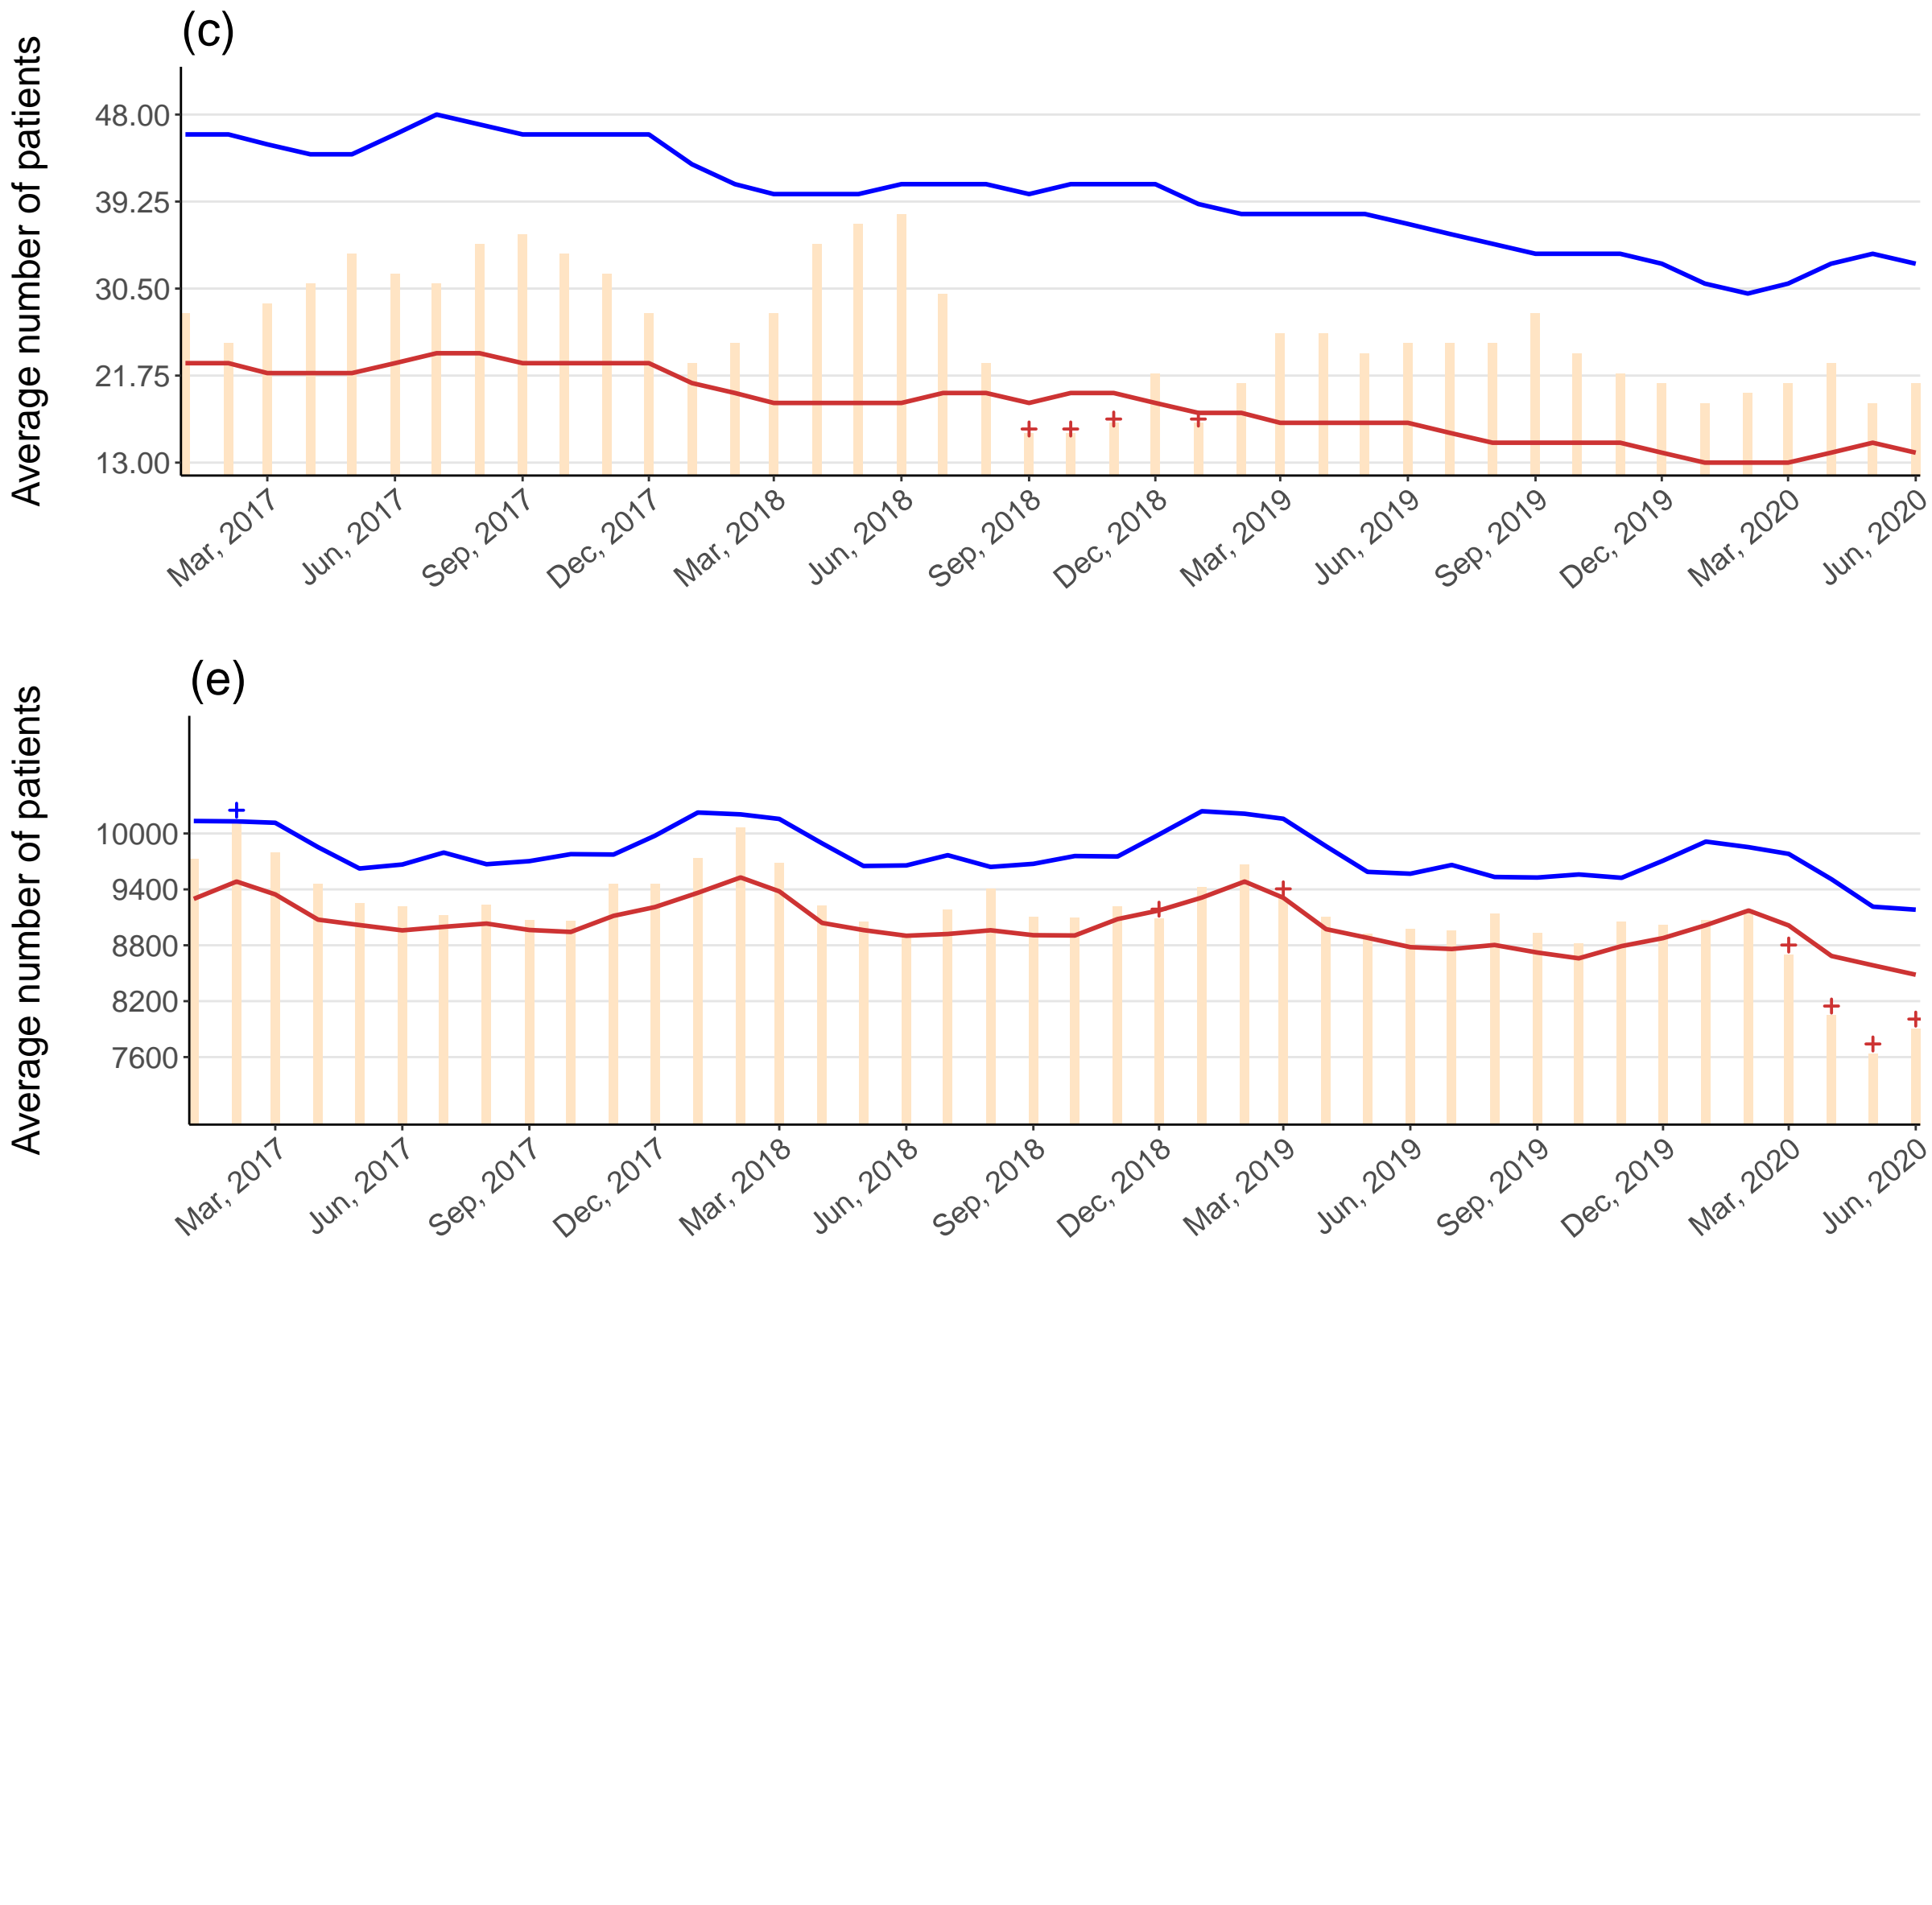



Shizuoka

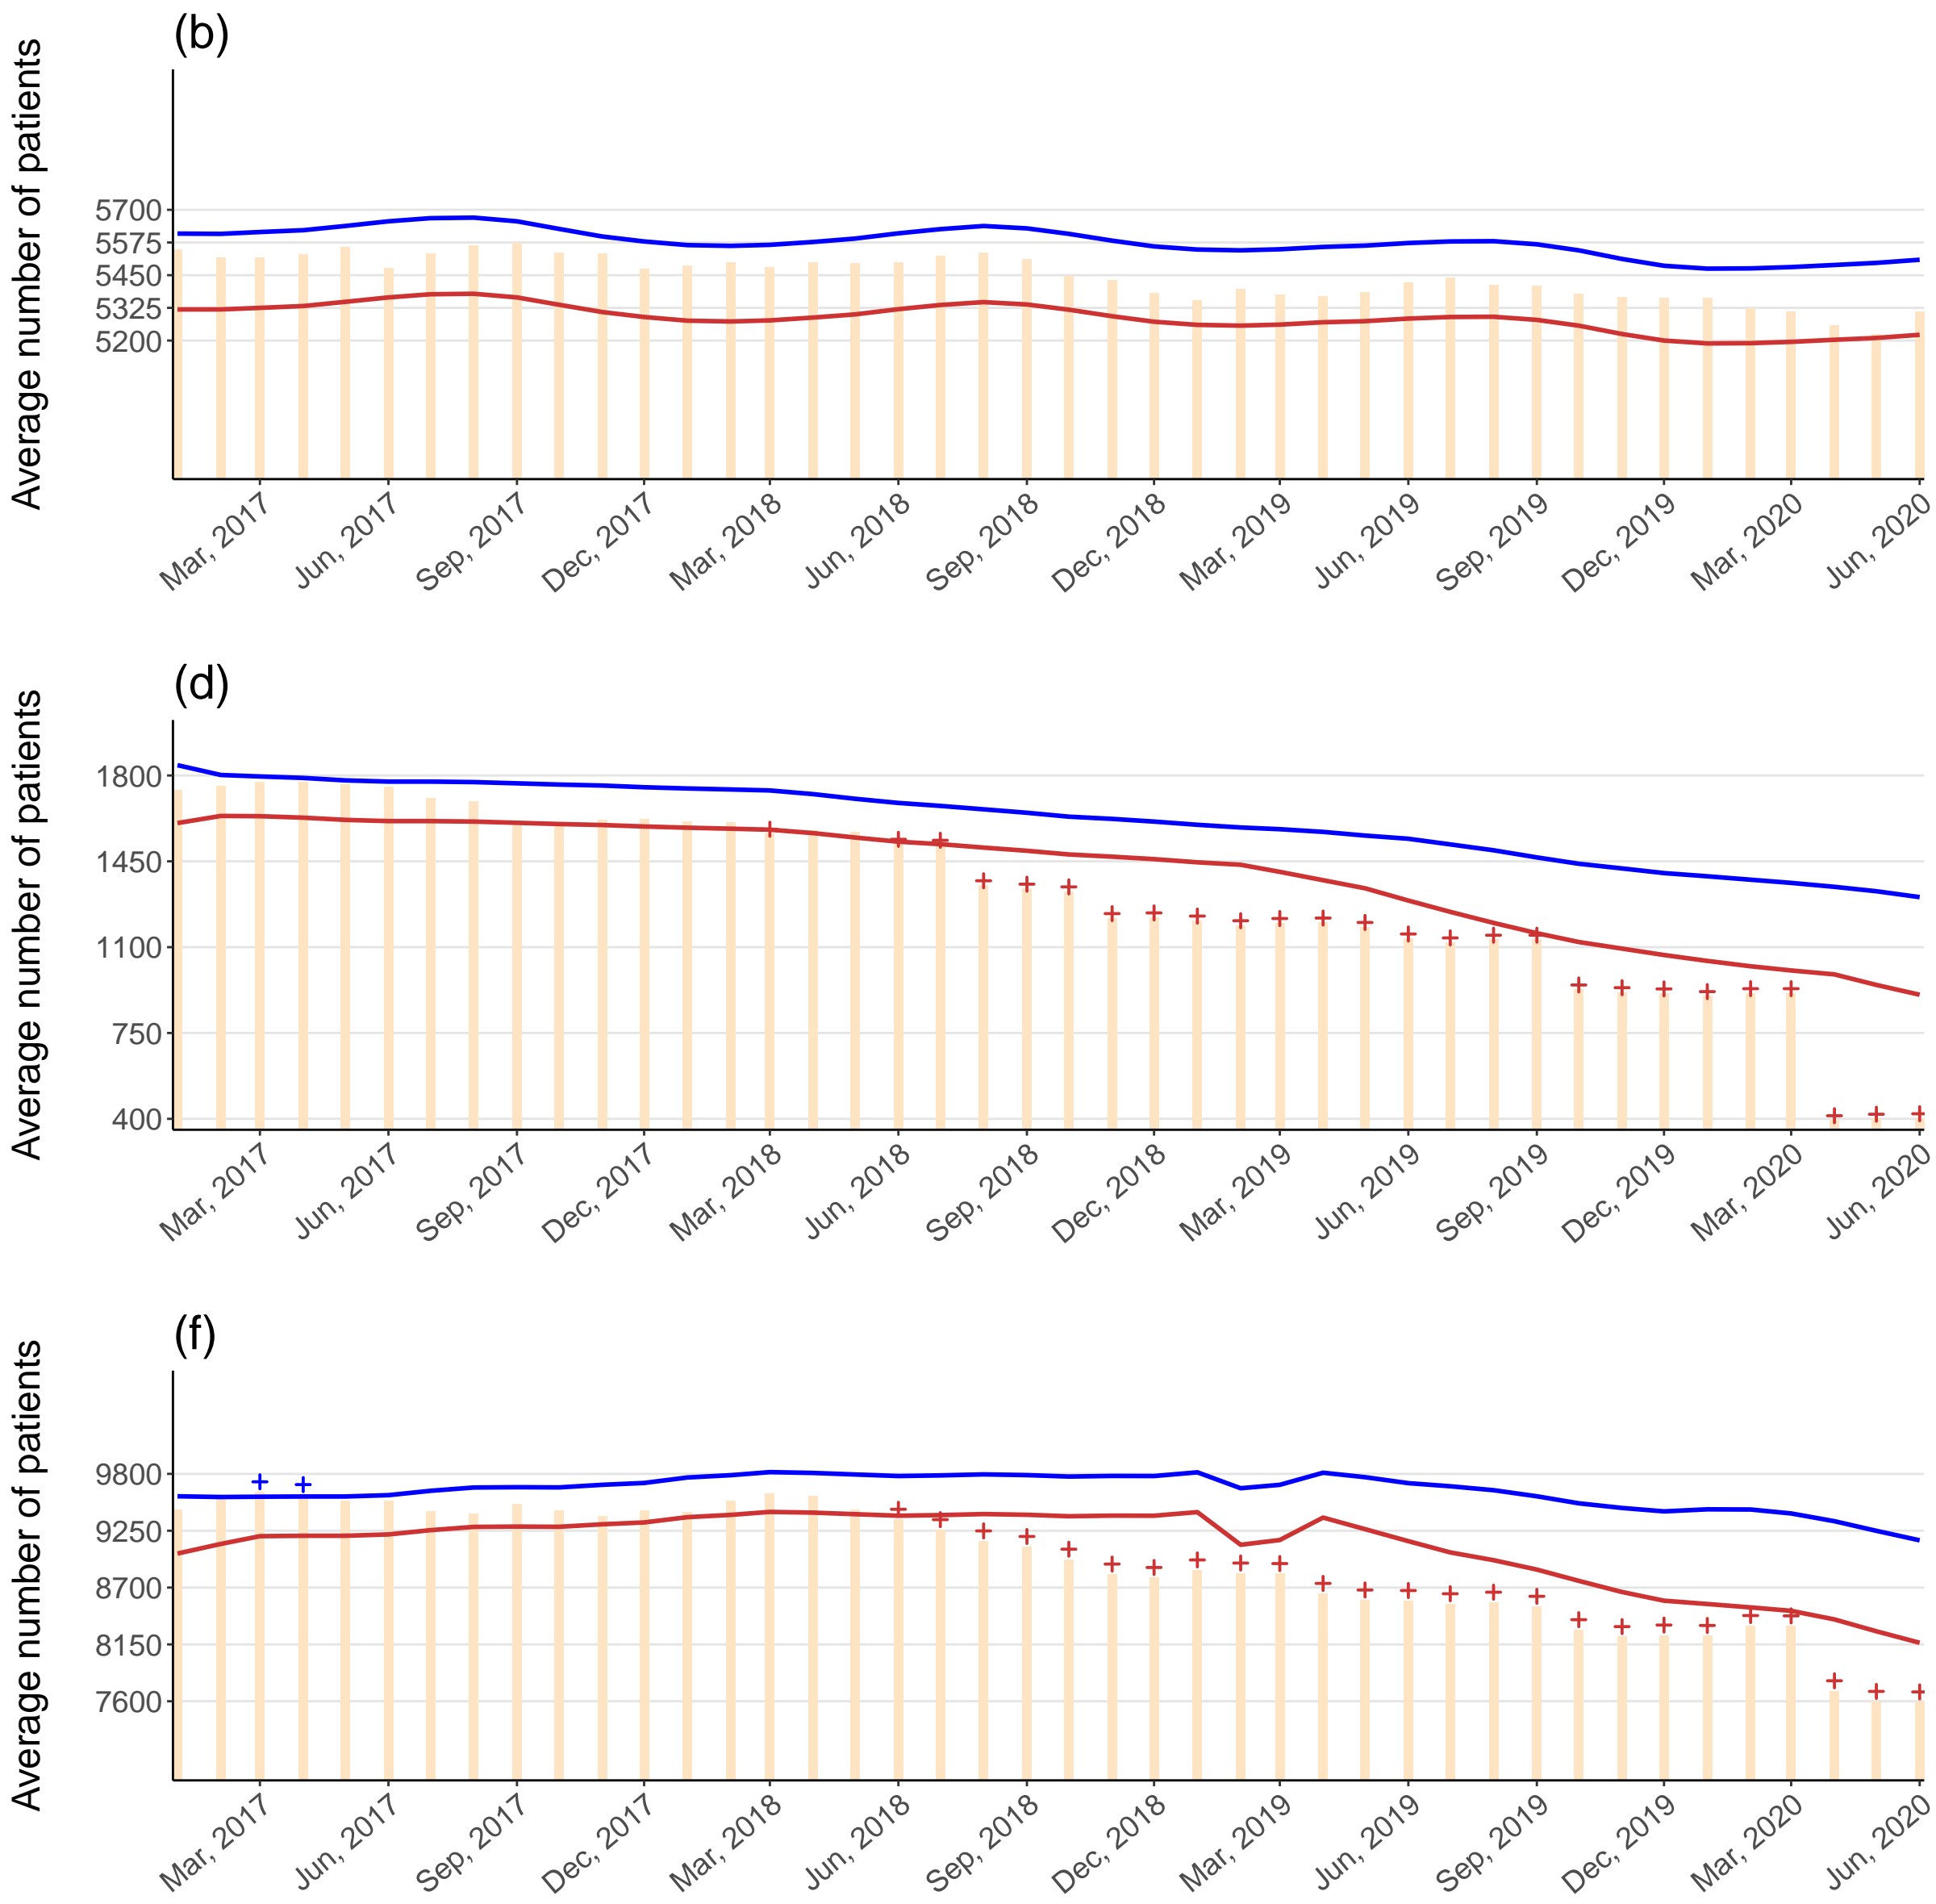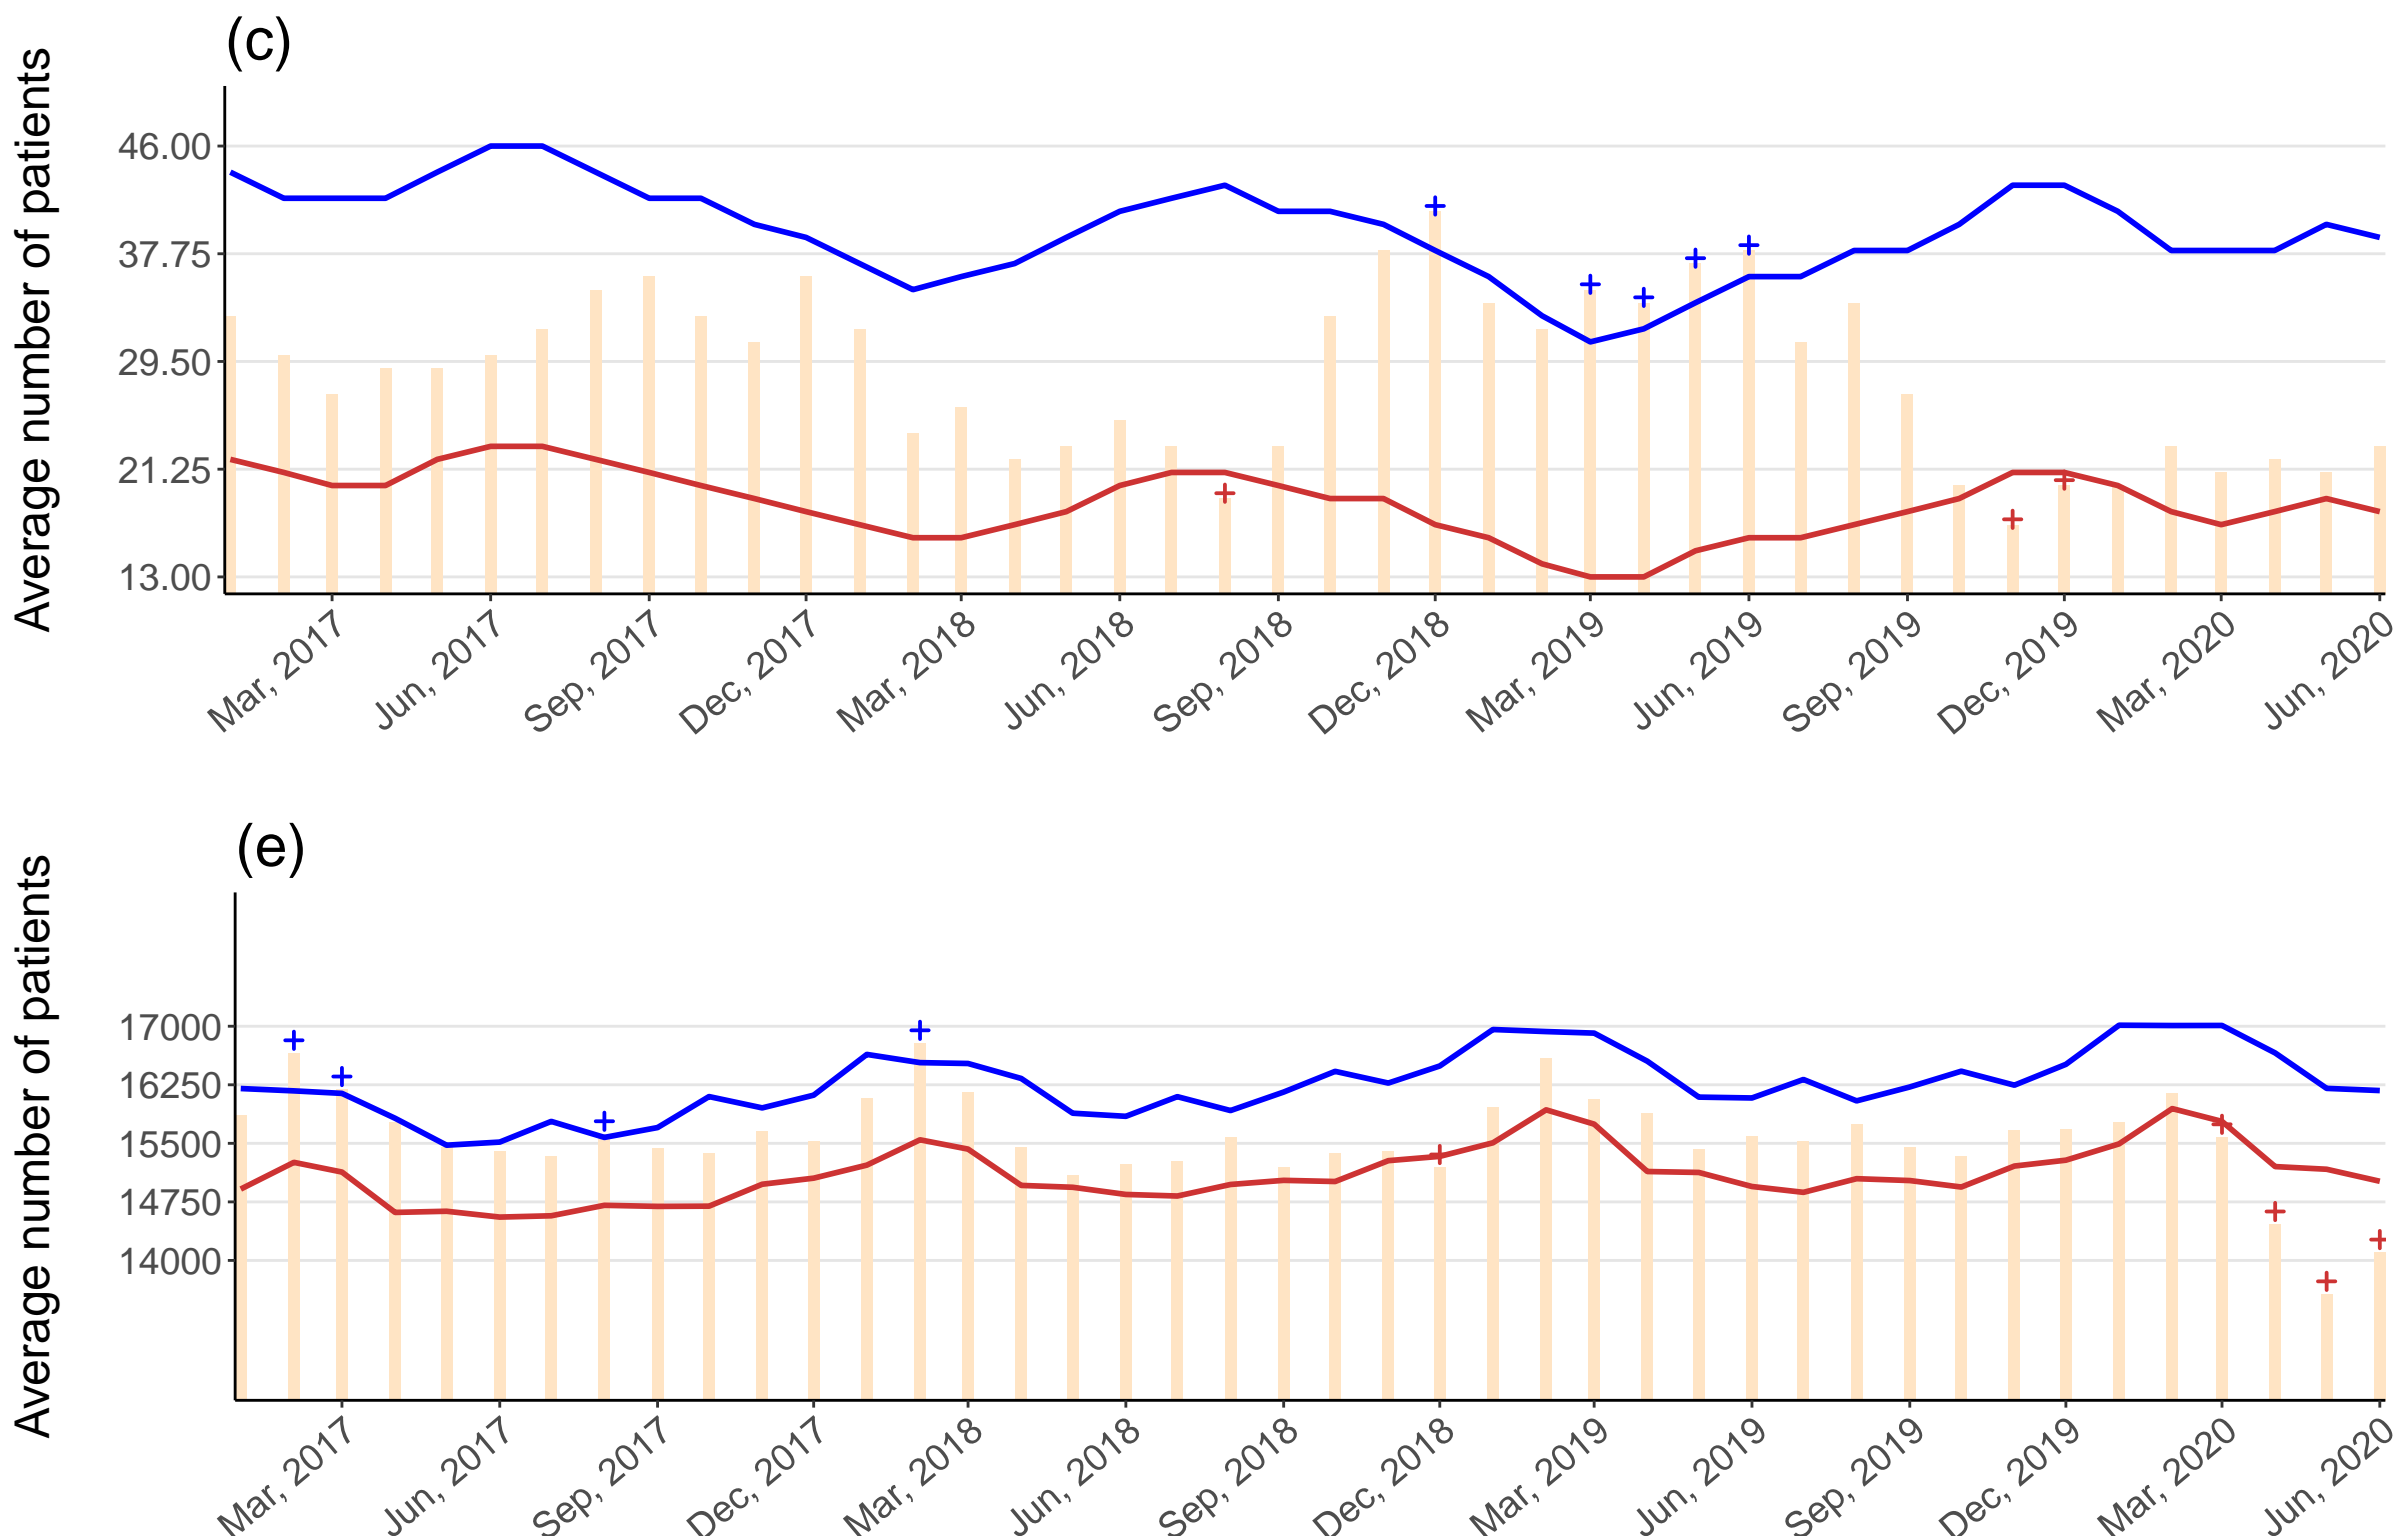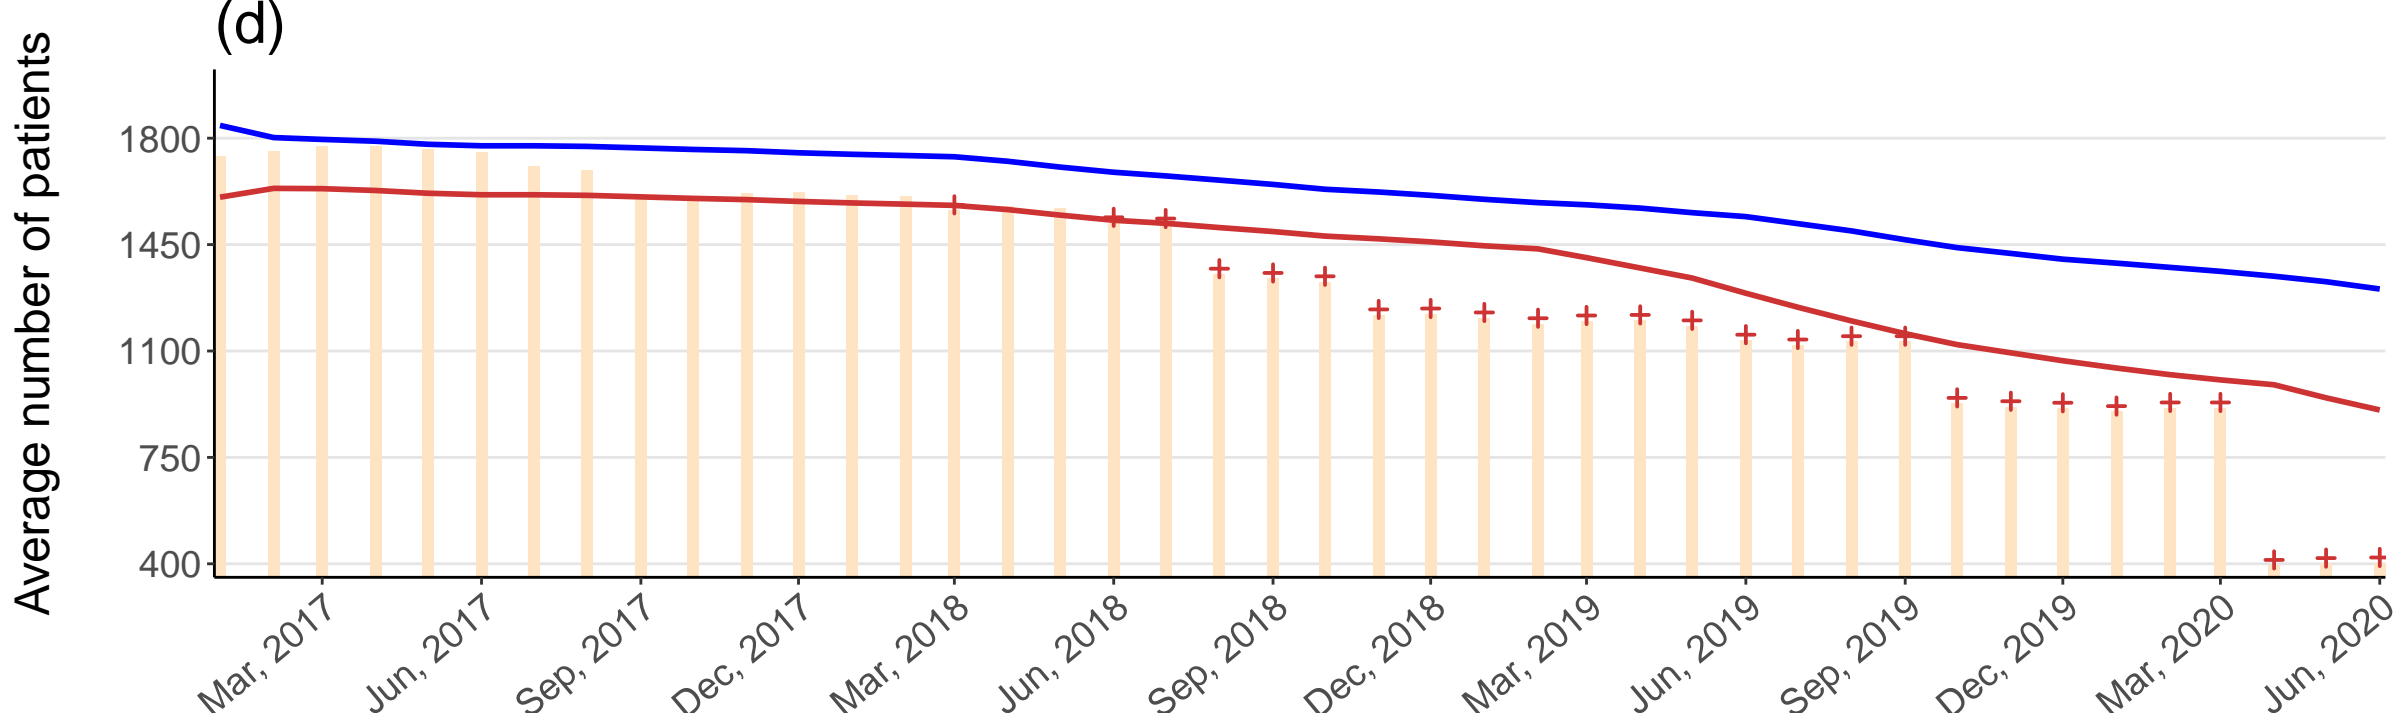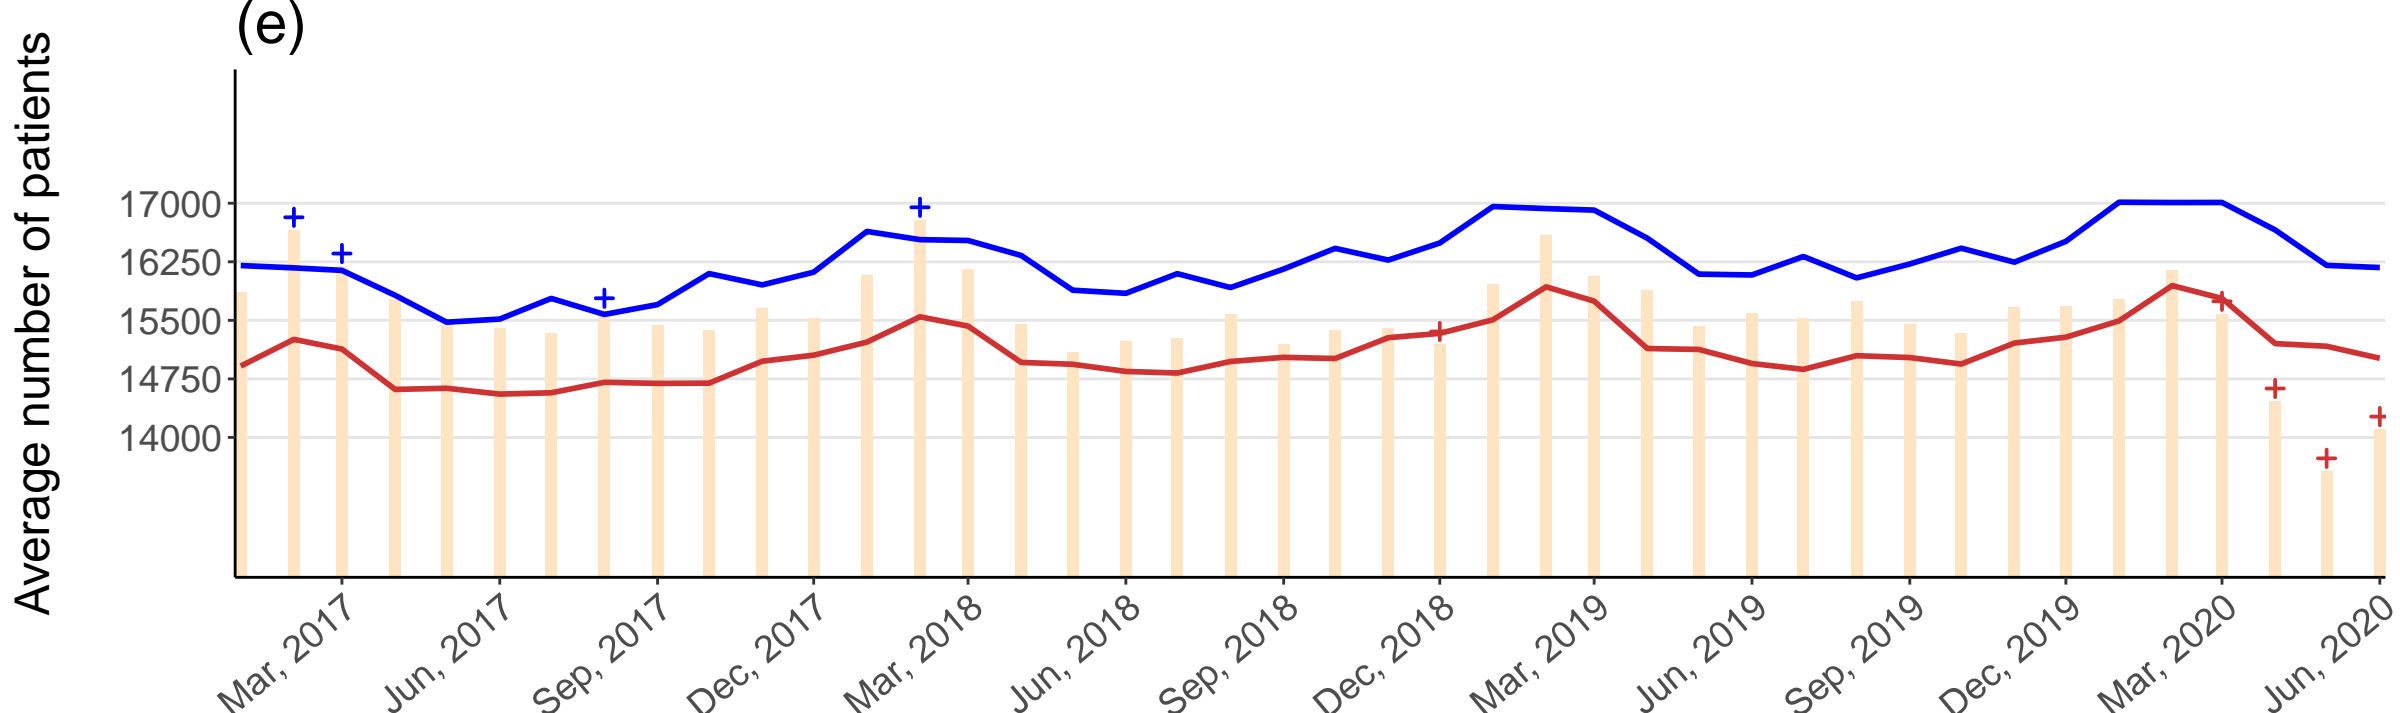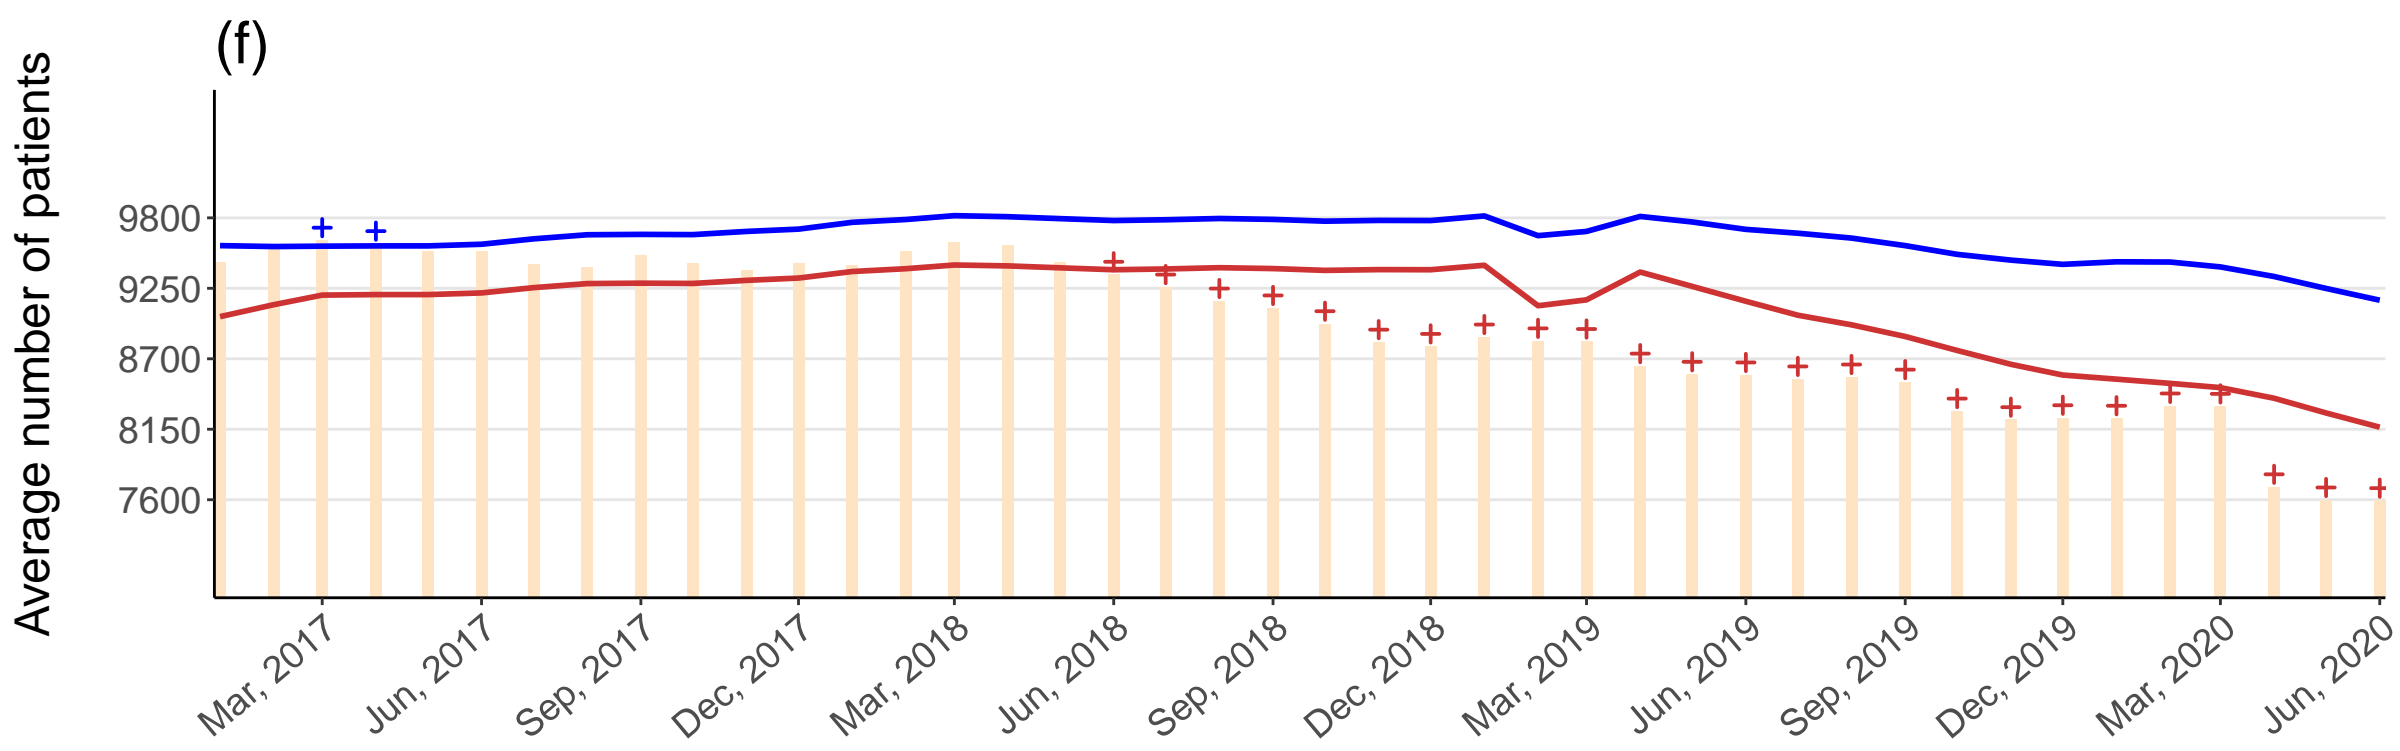

Aichi

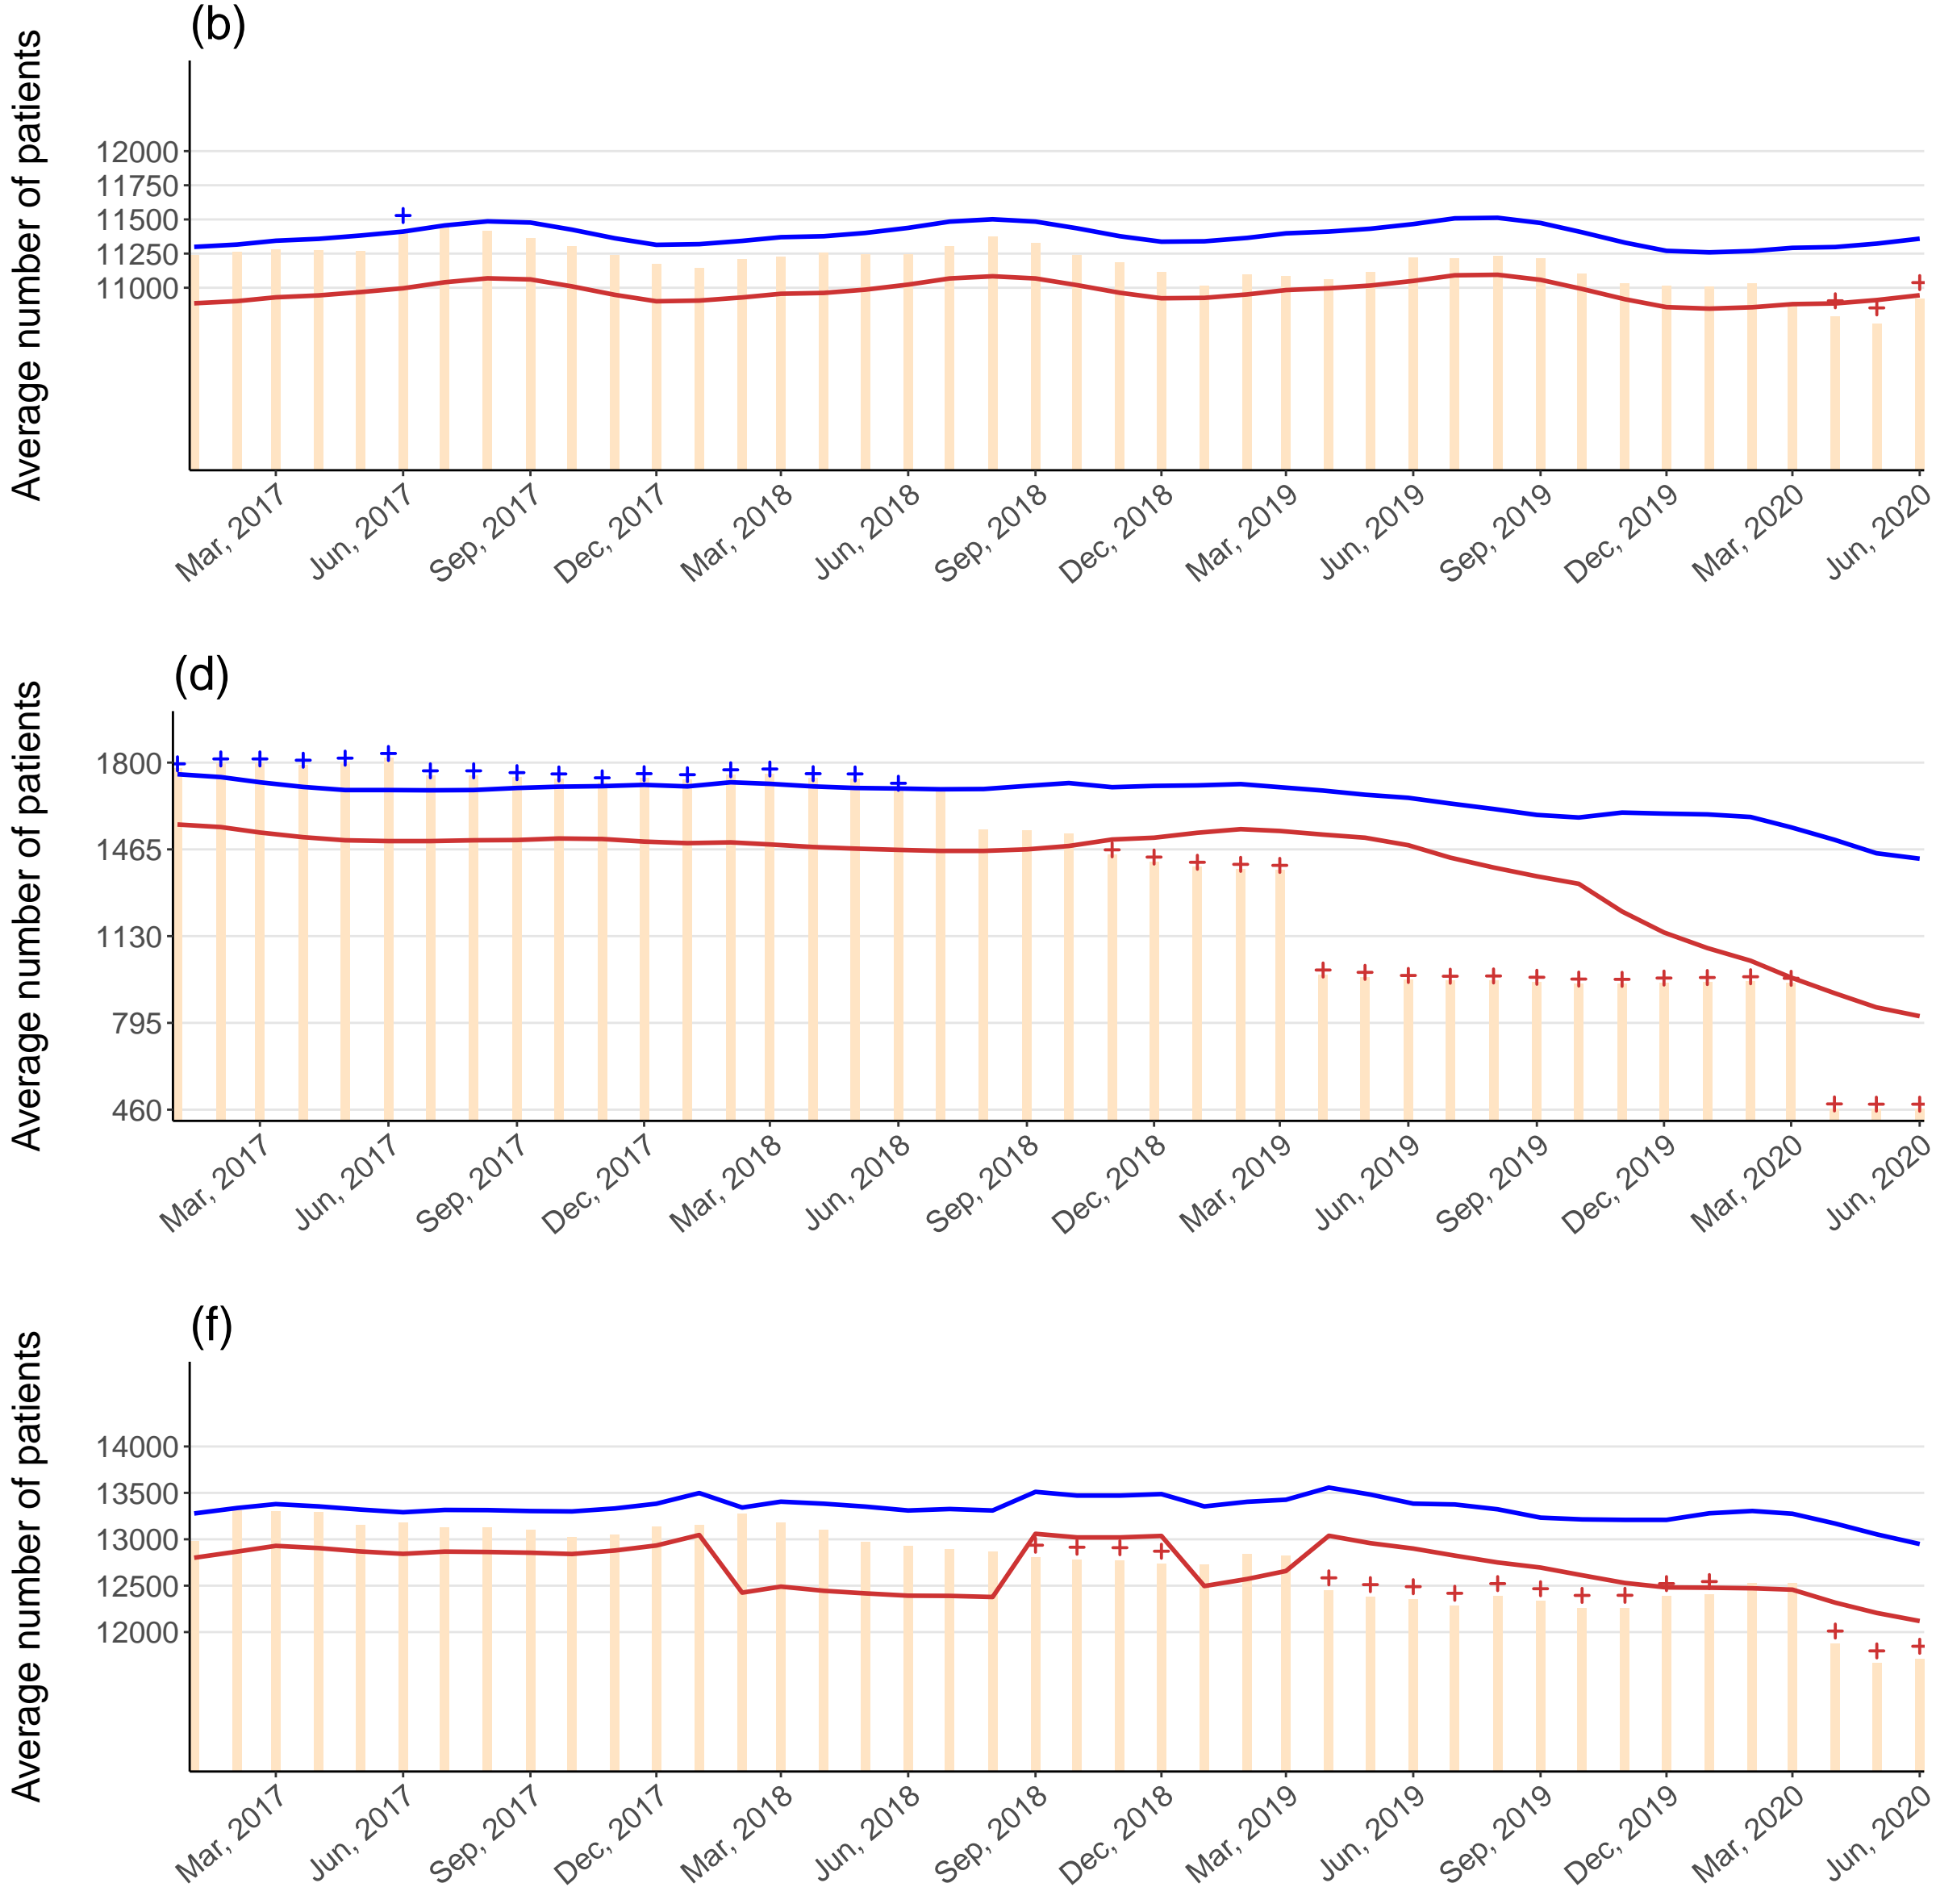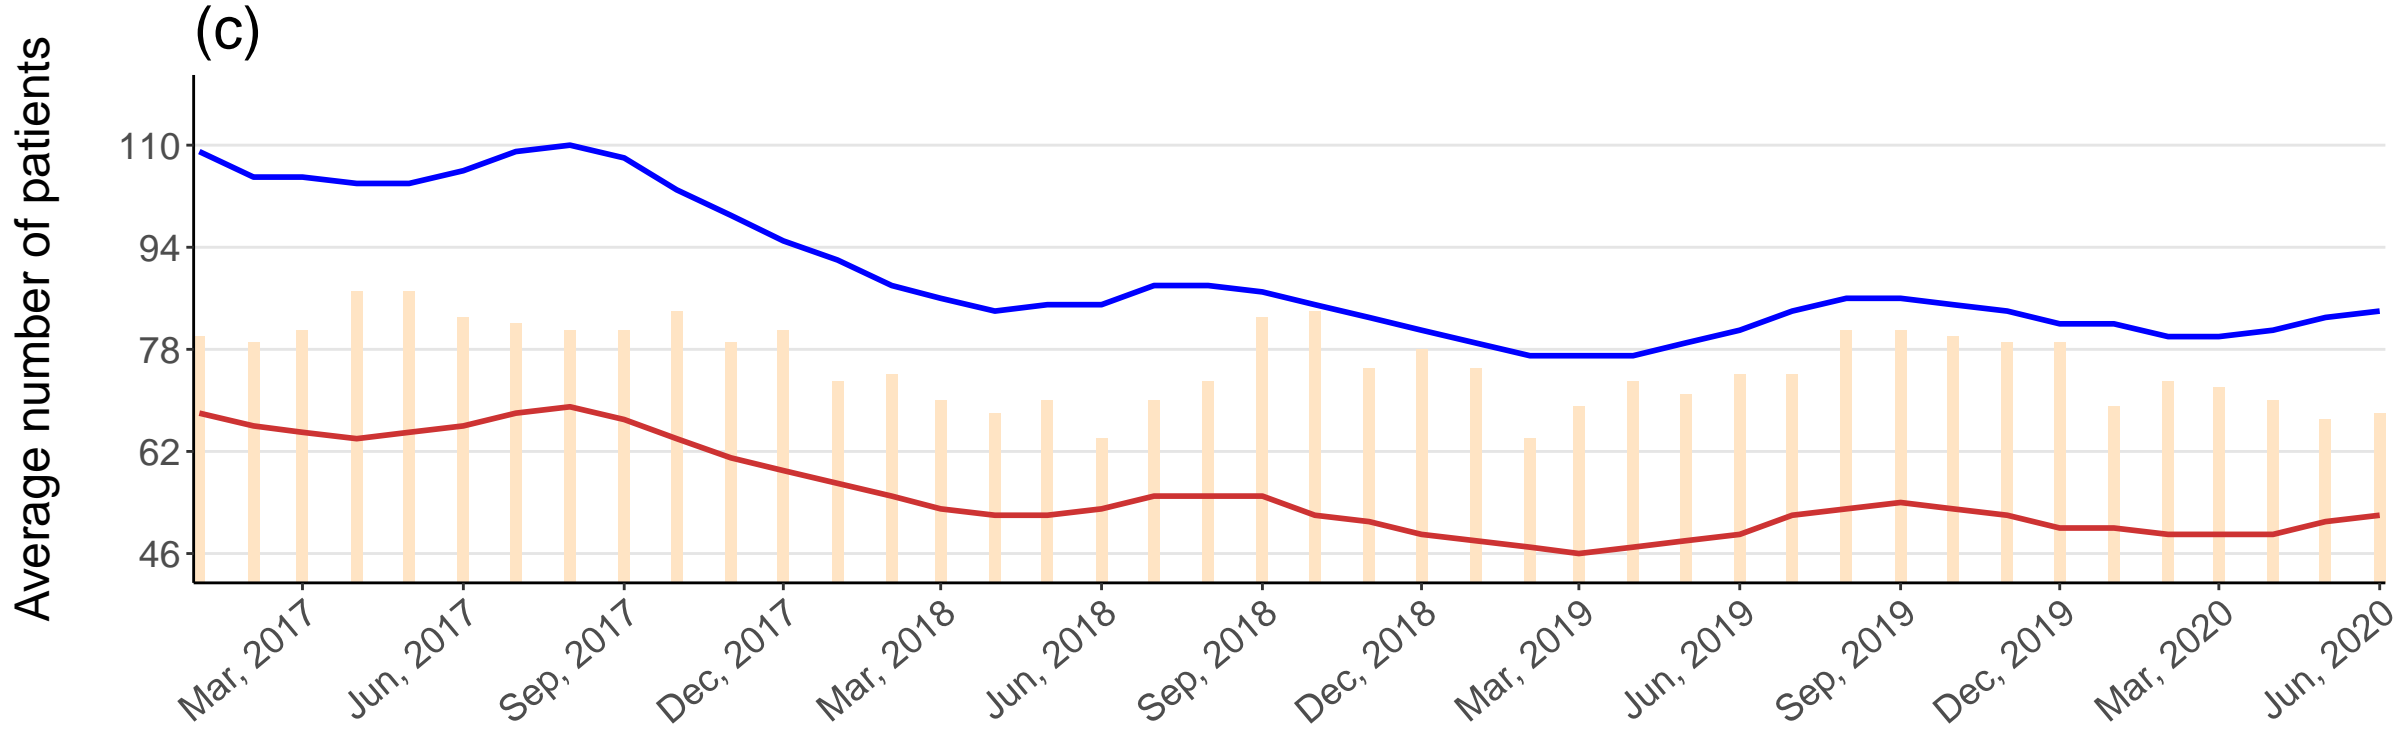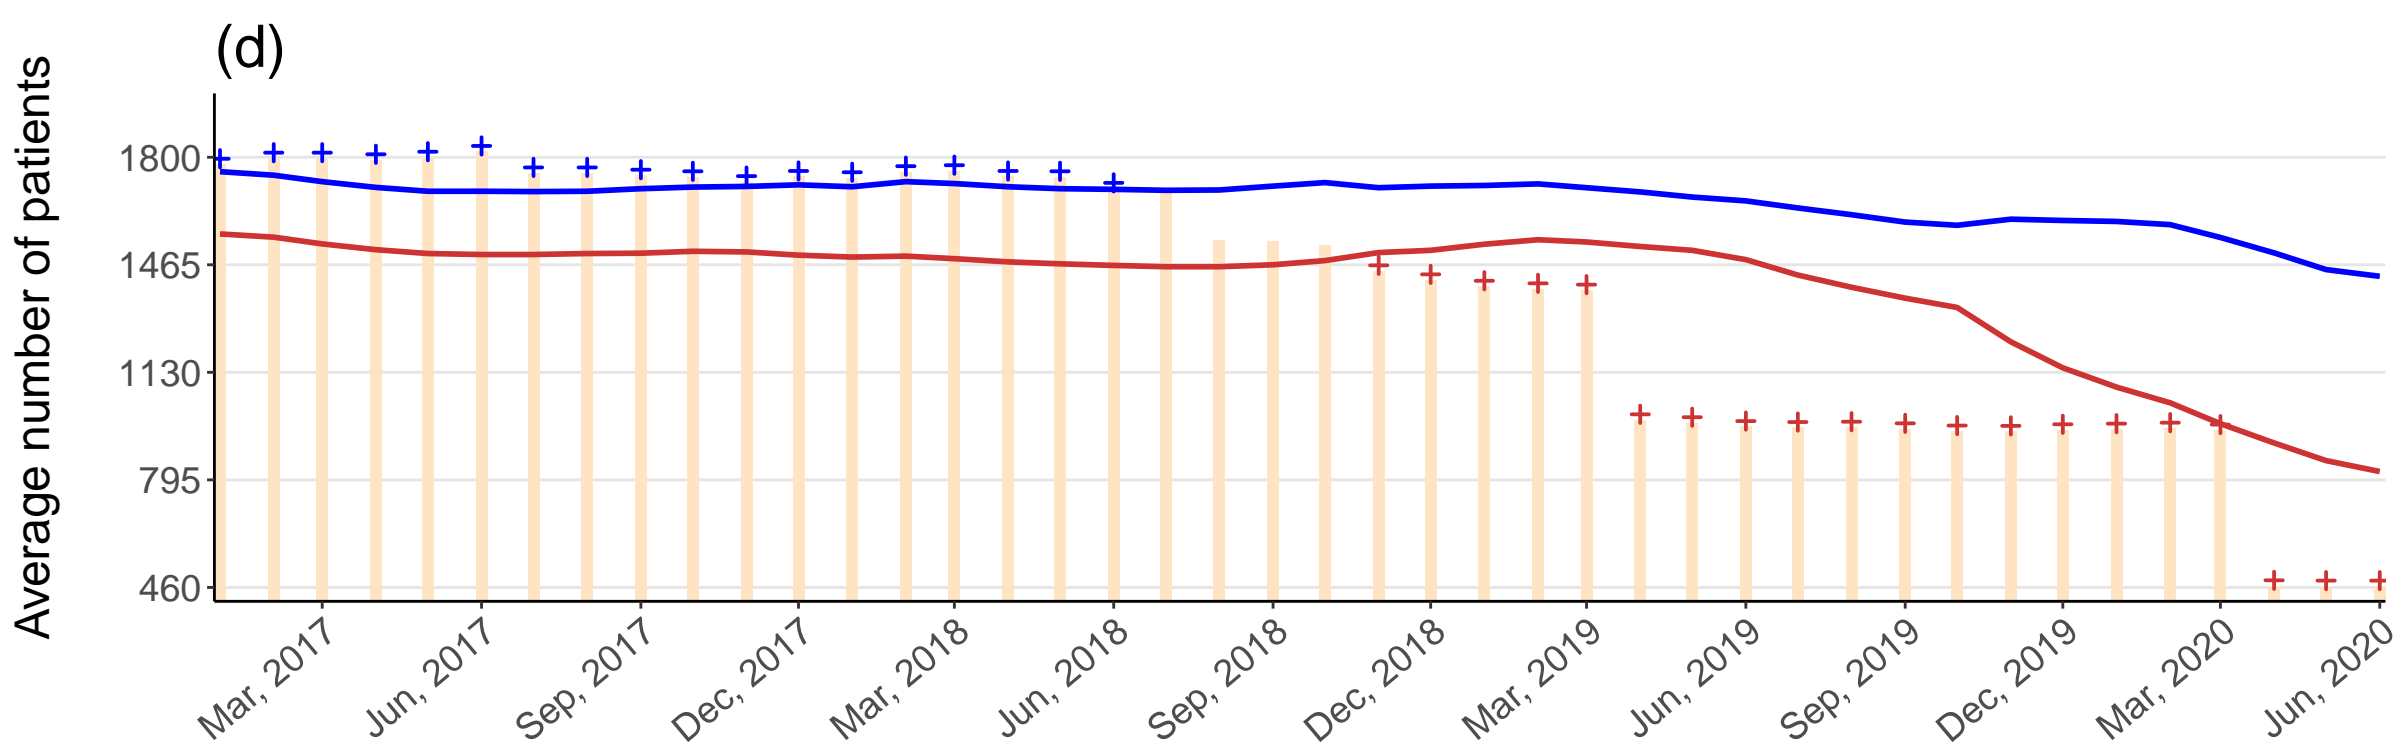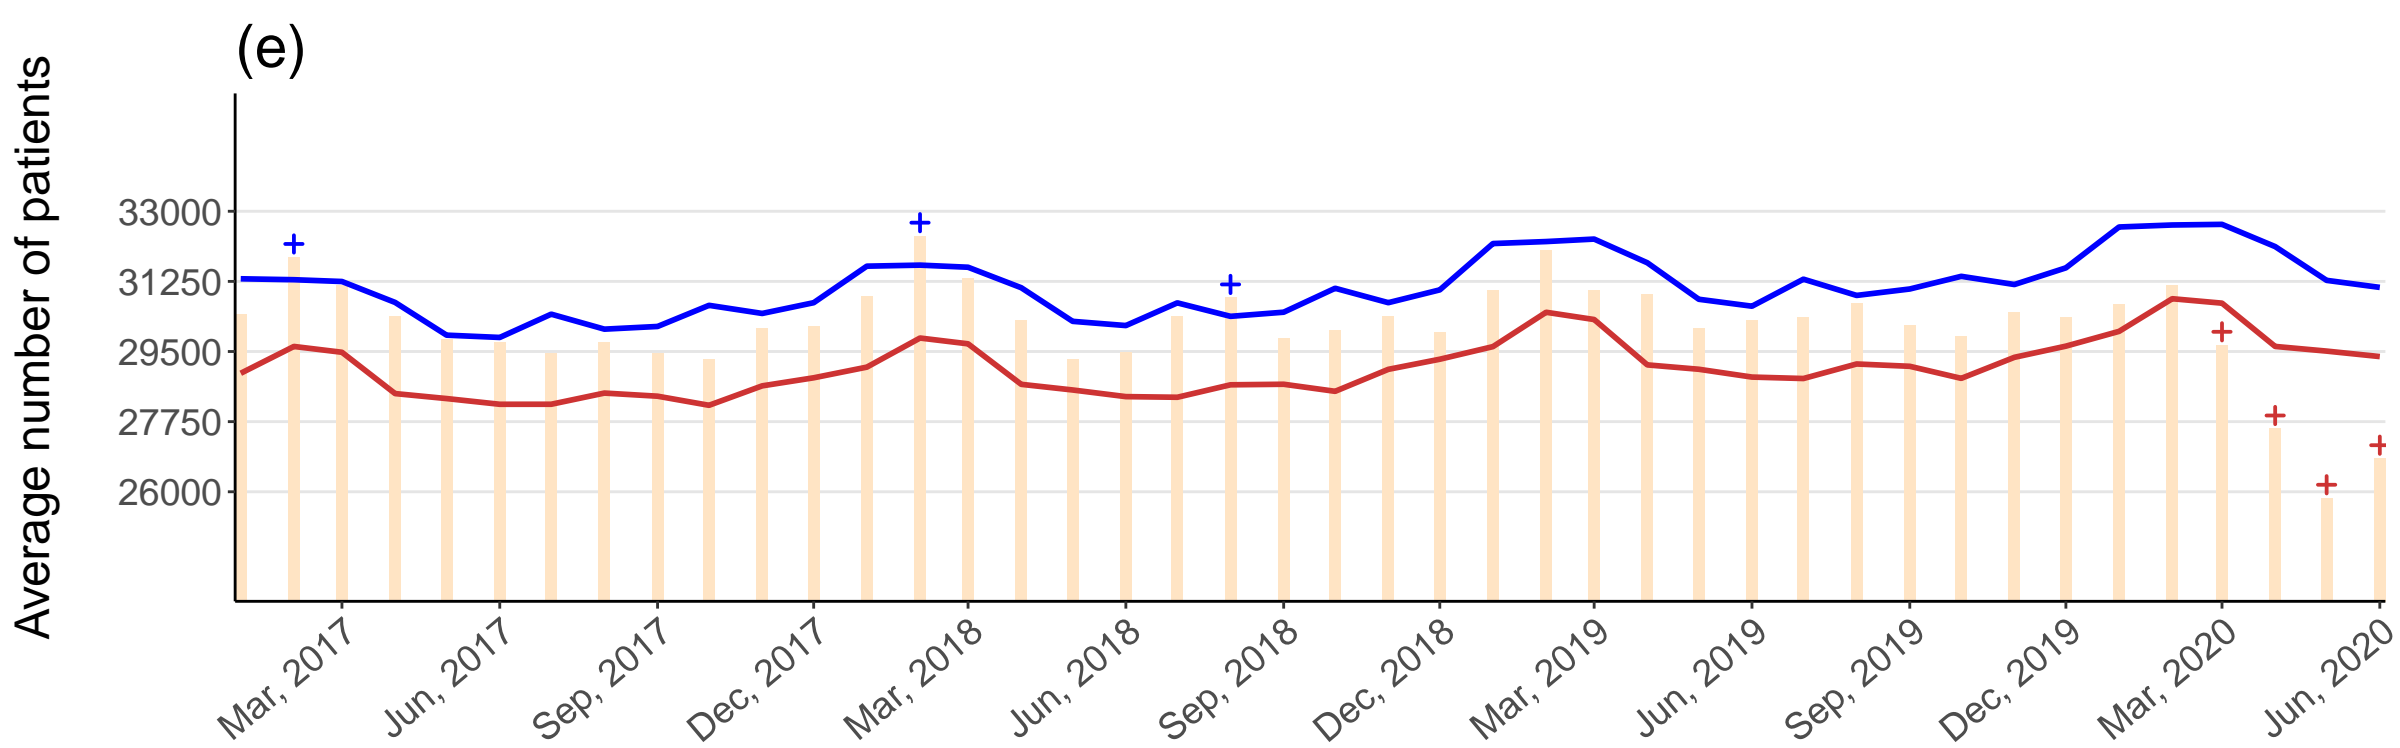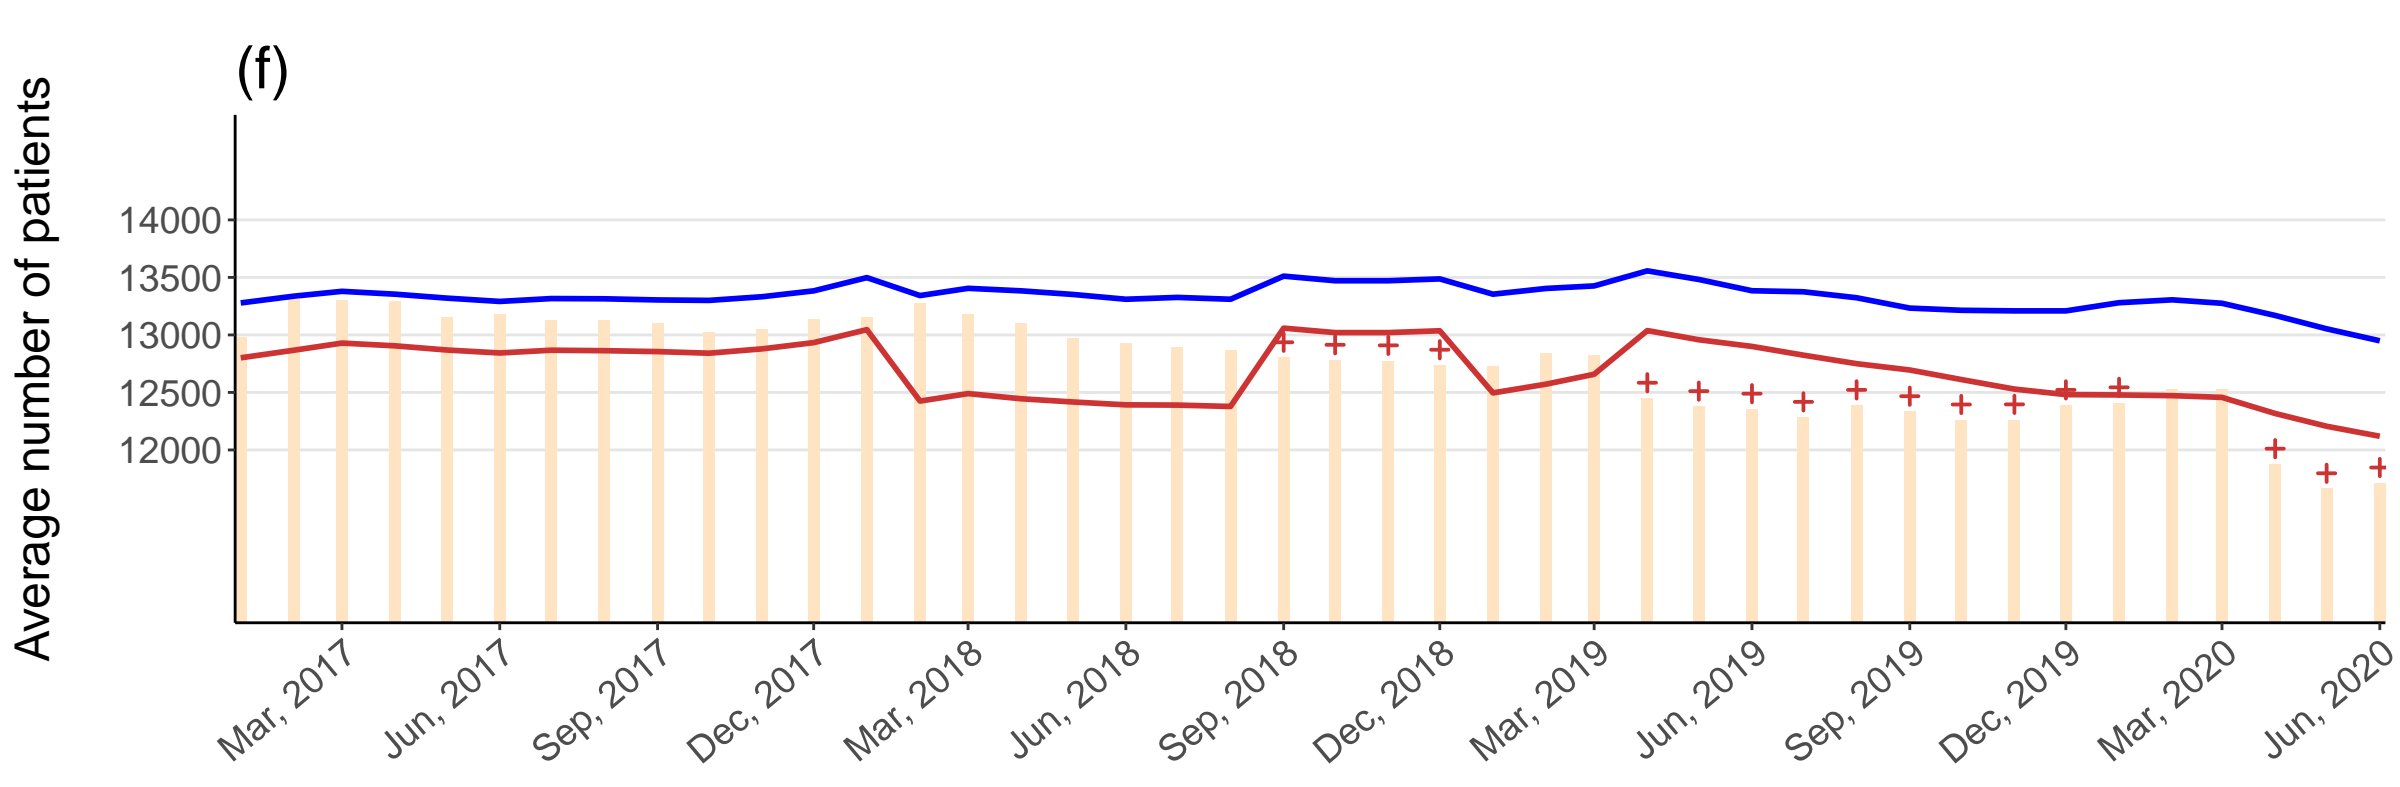

Mie

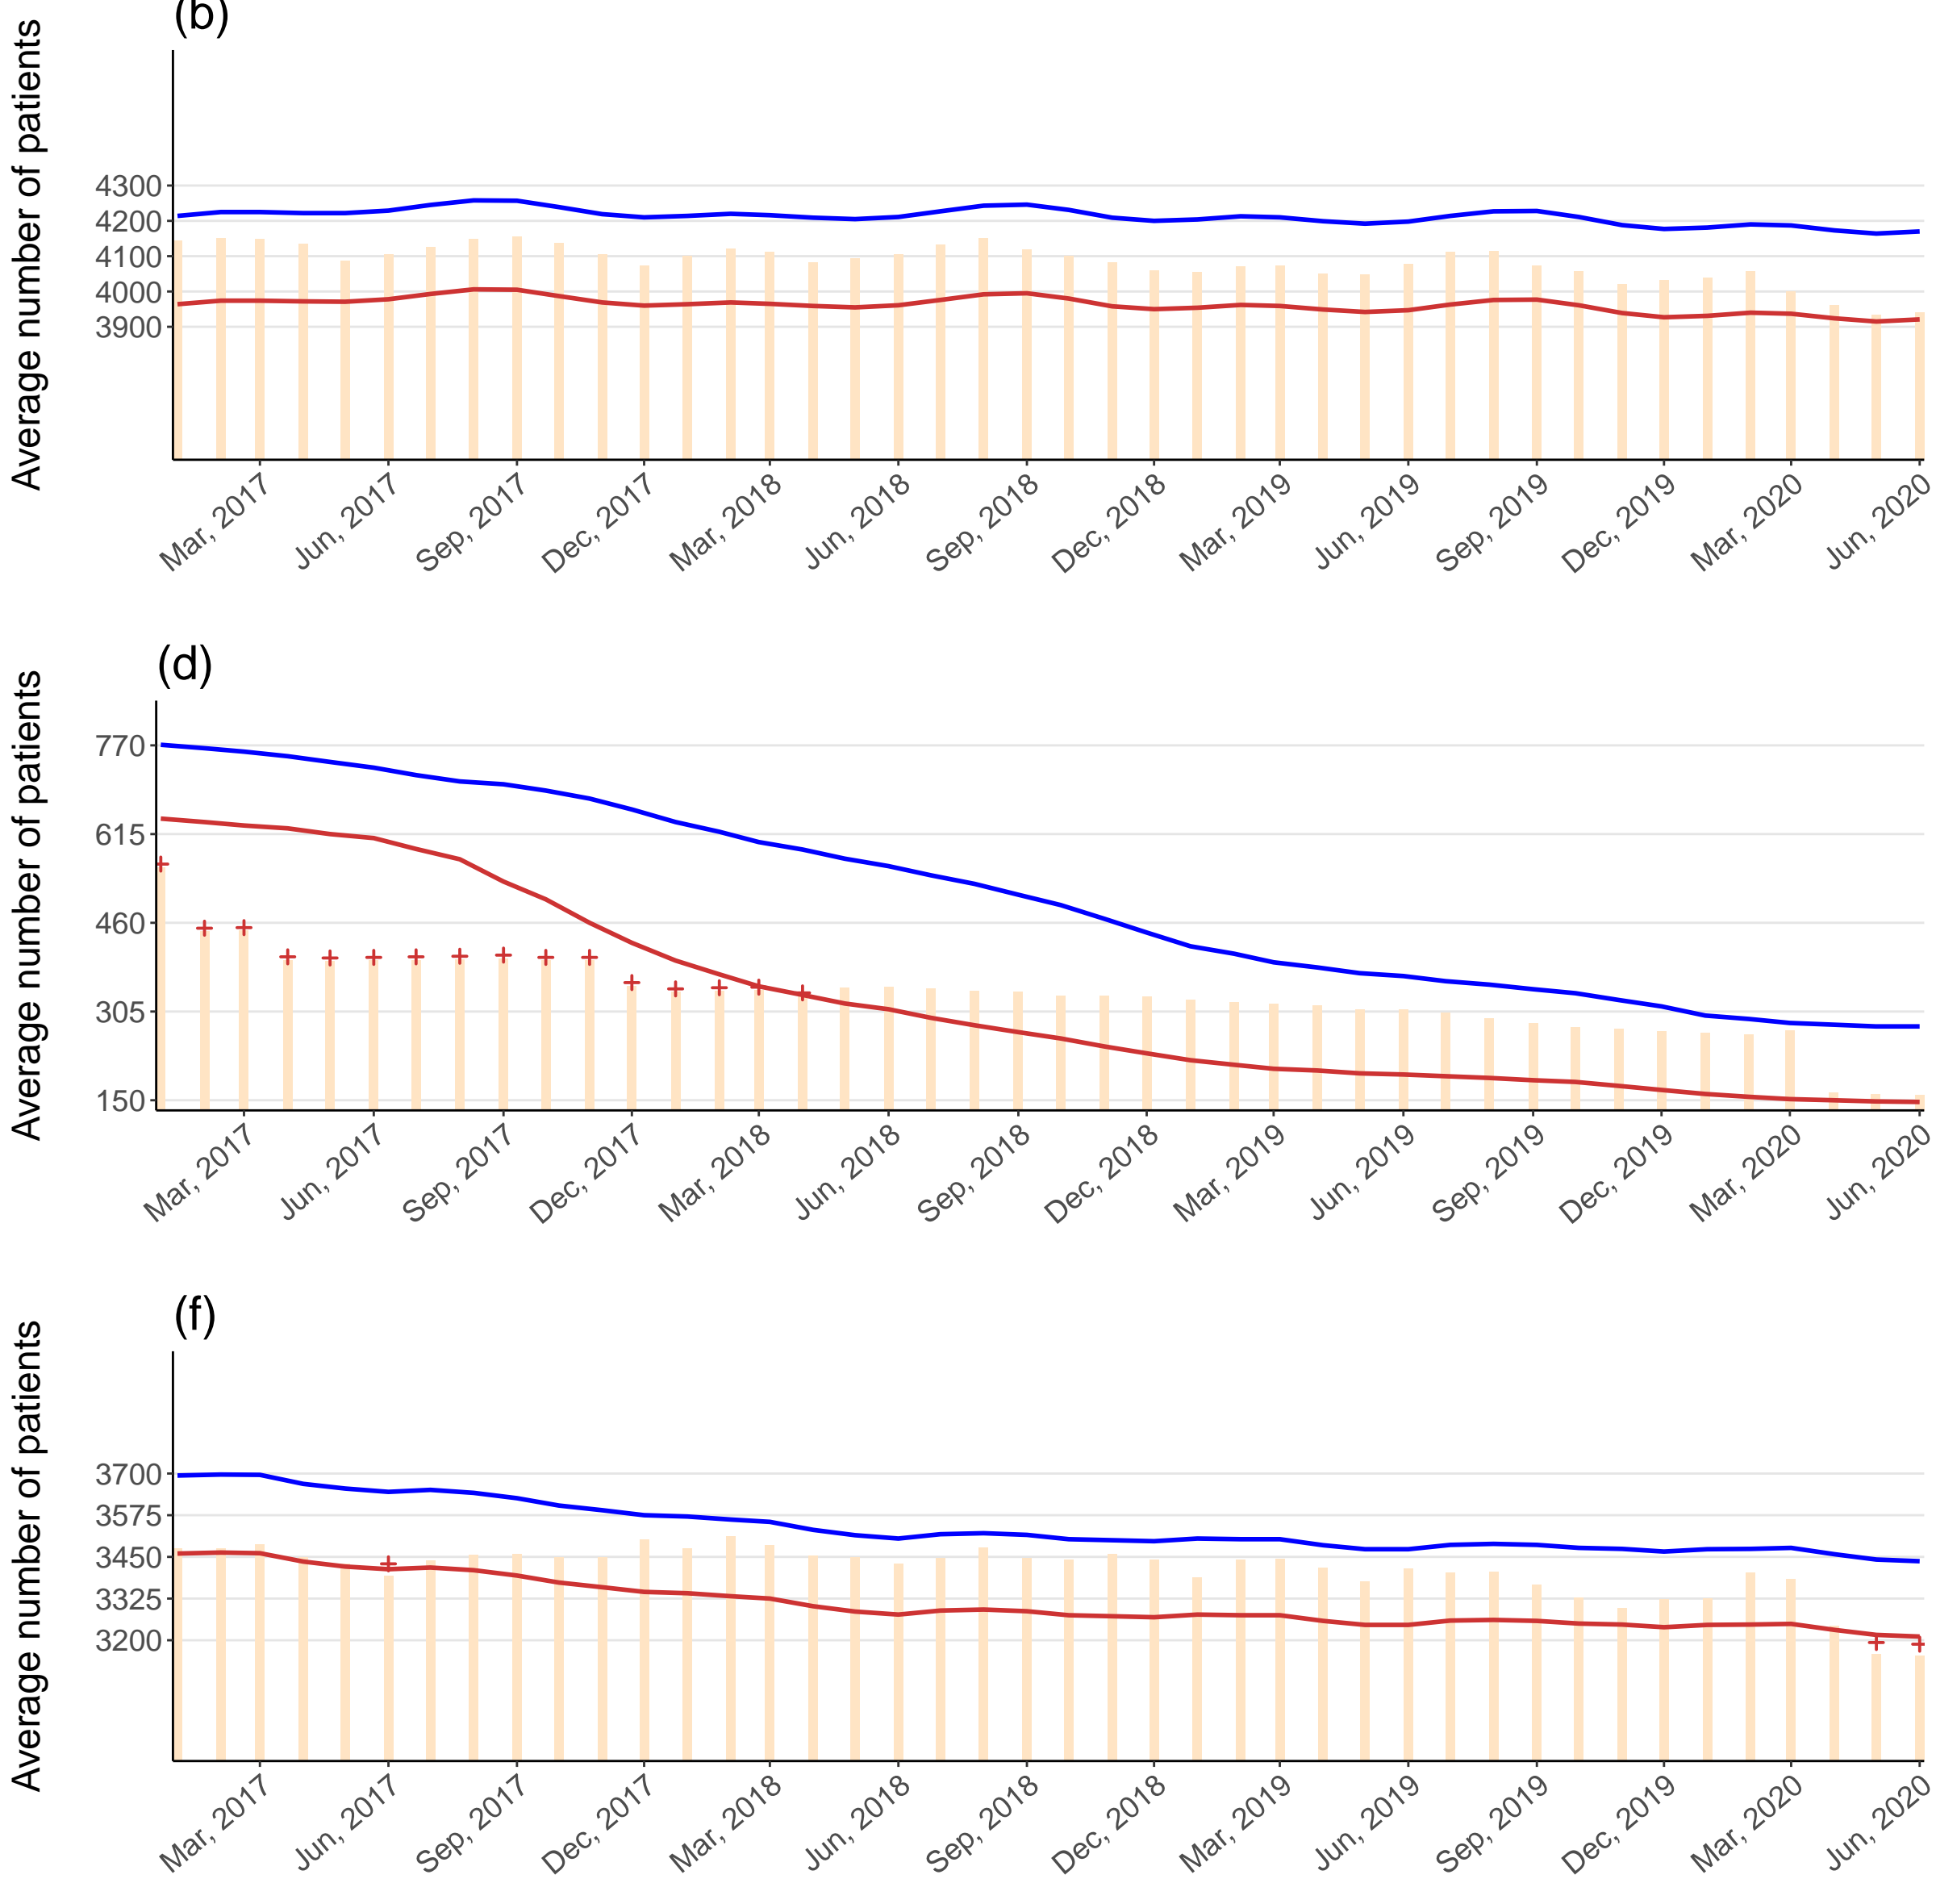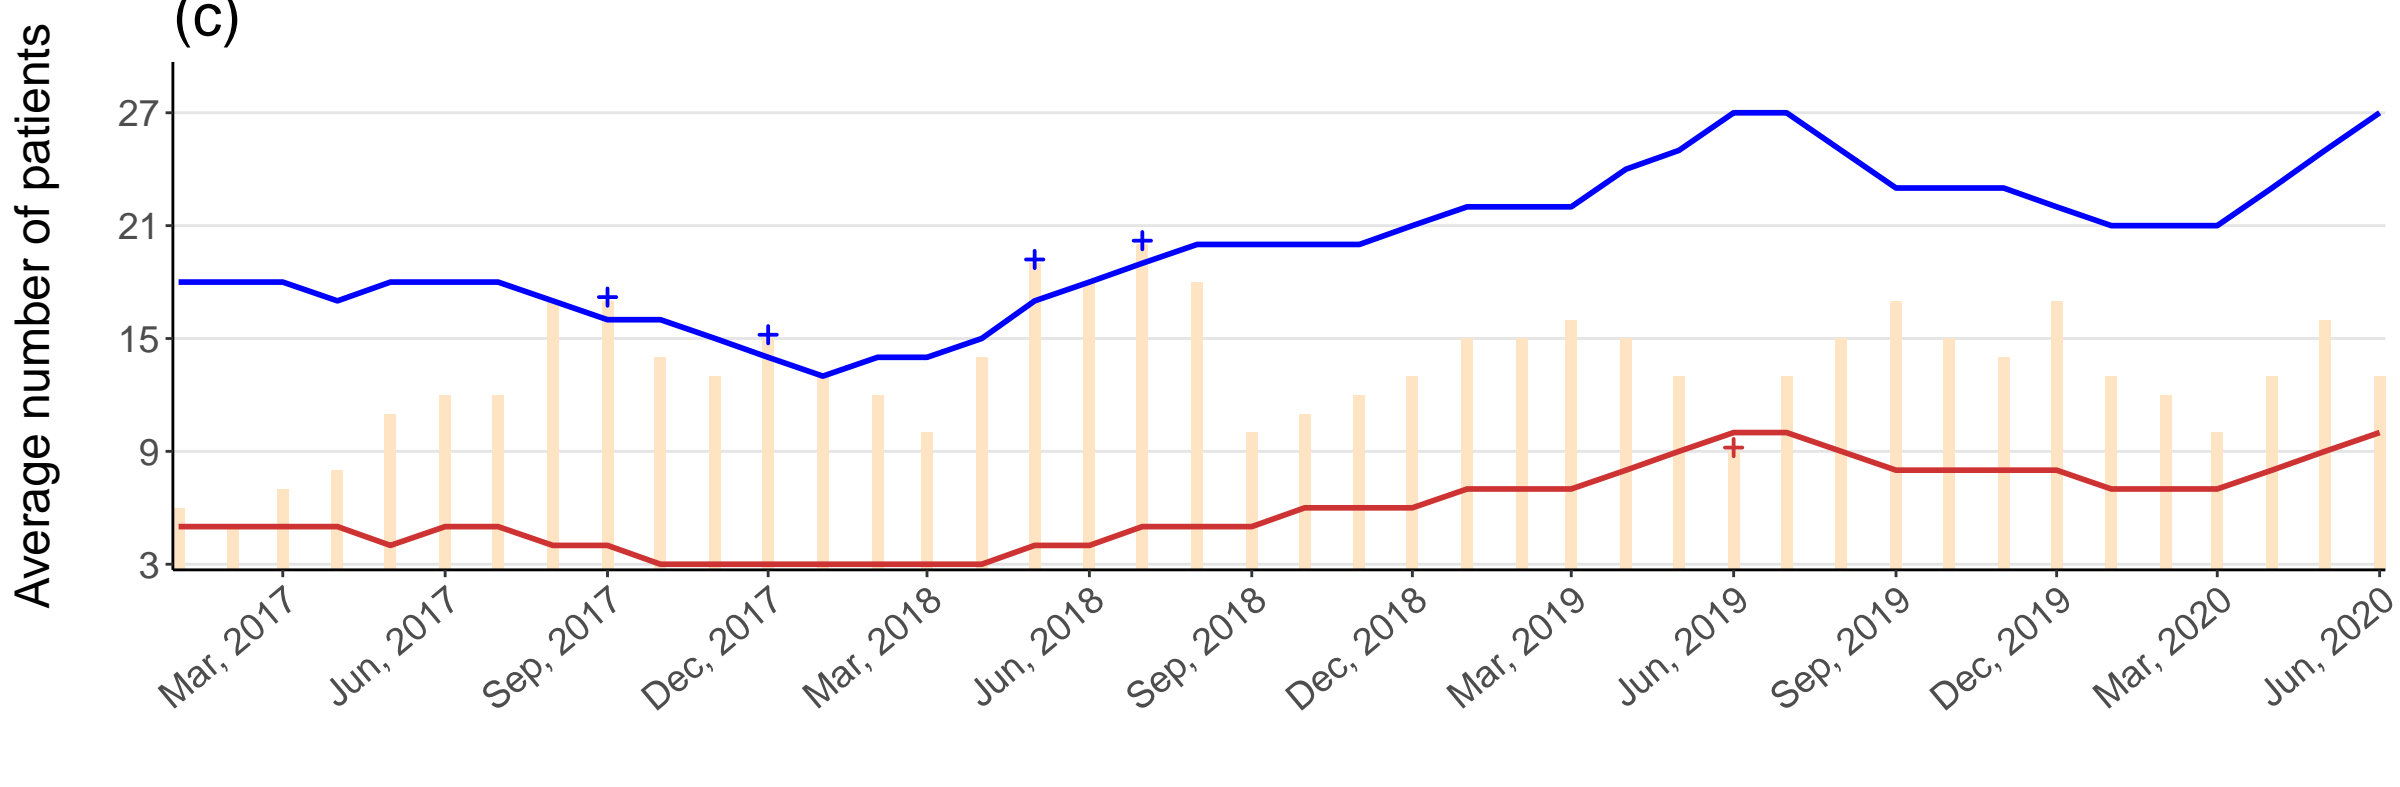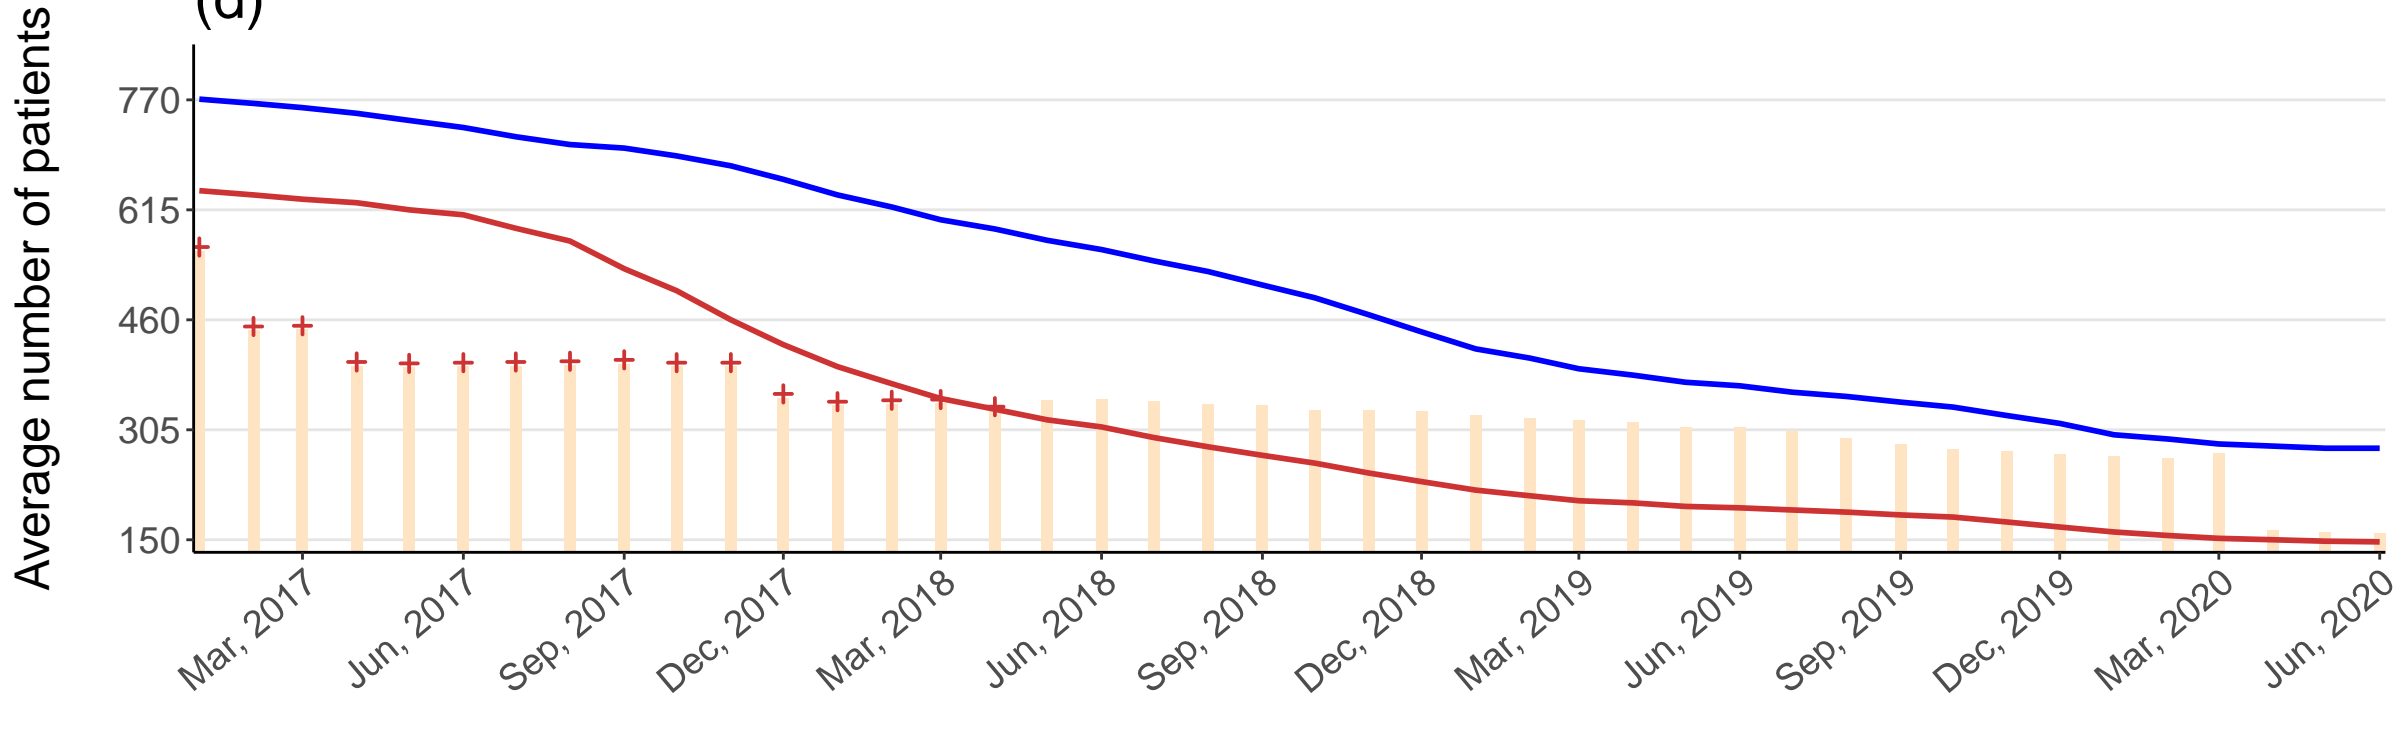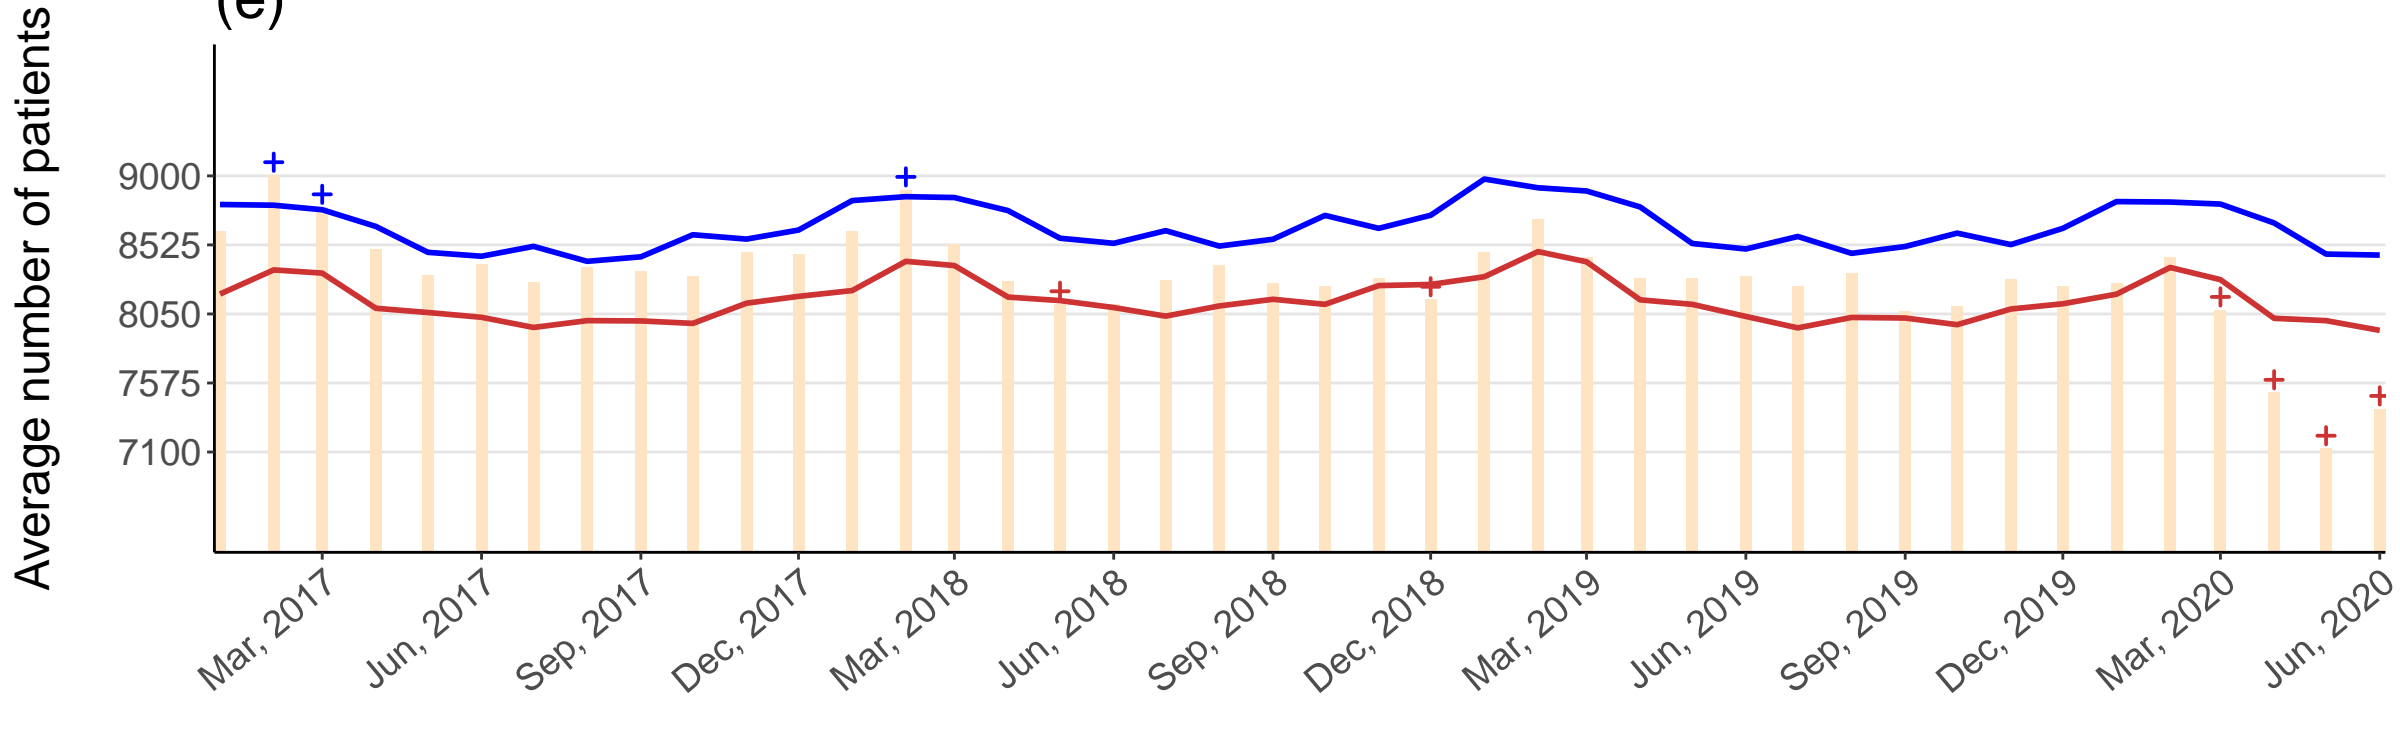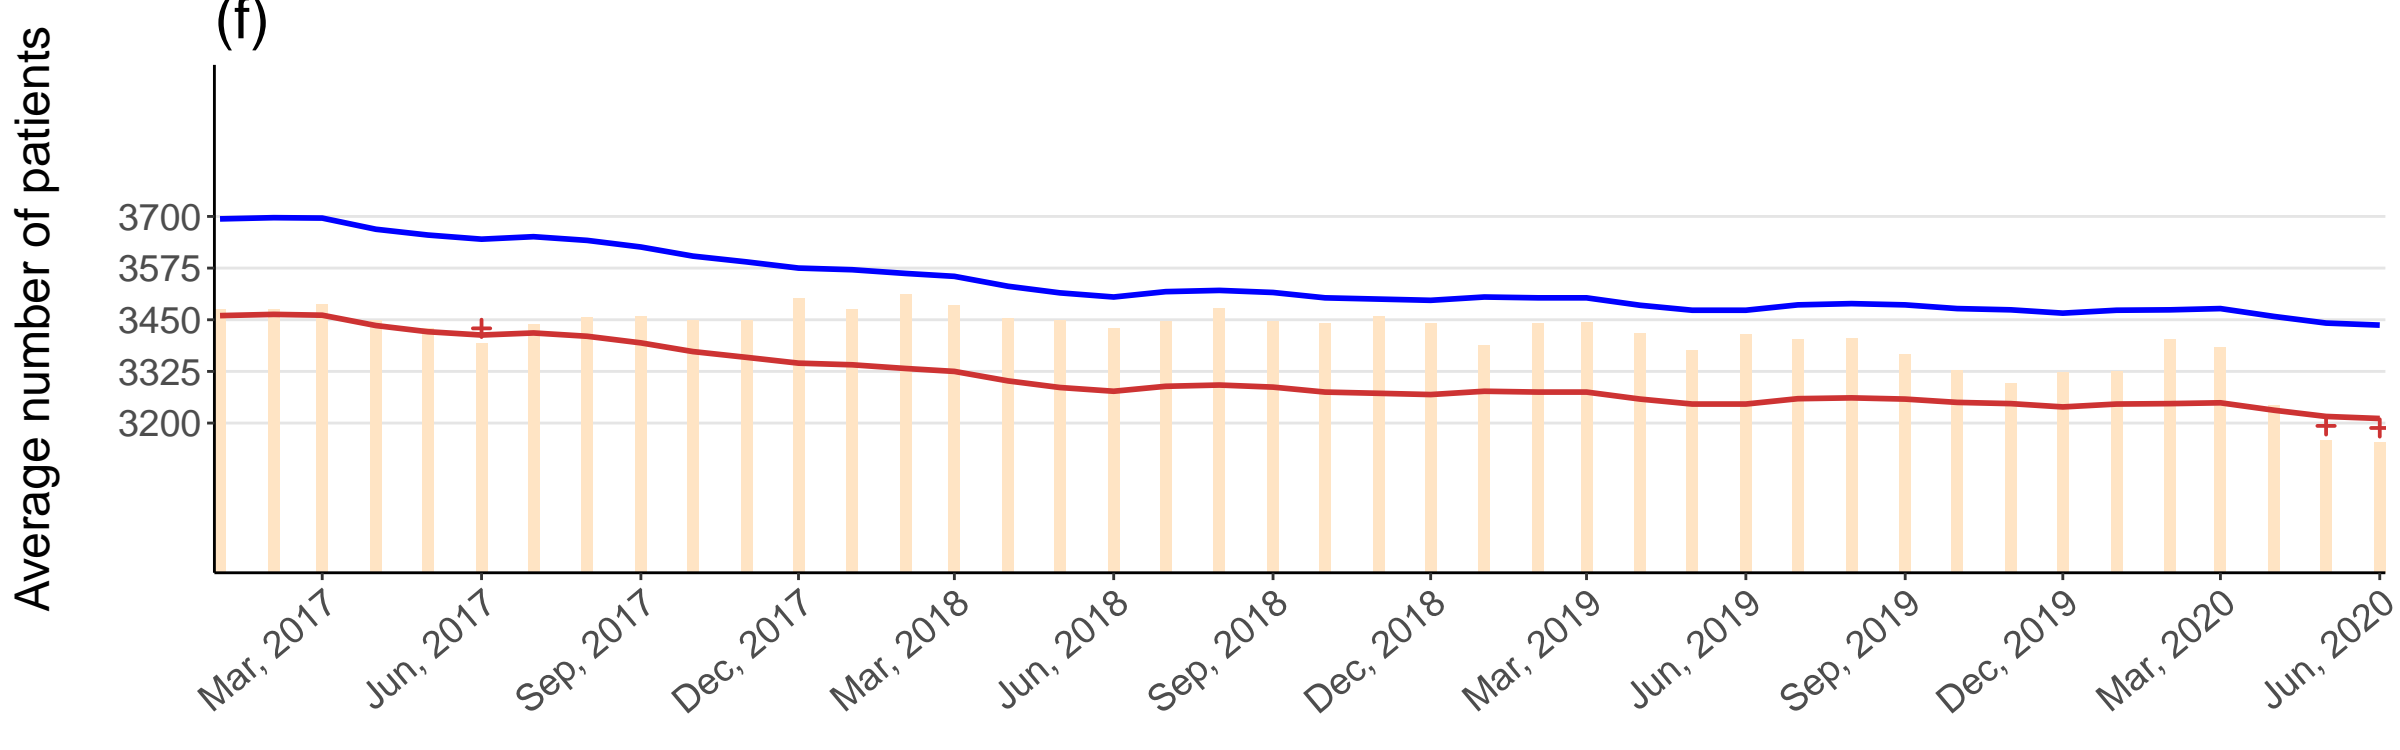



# Shiga

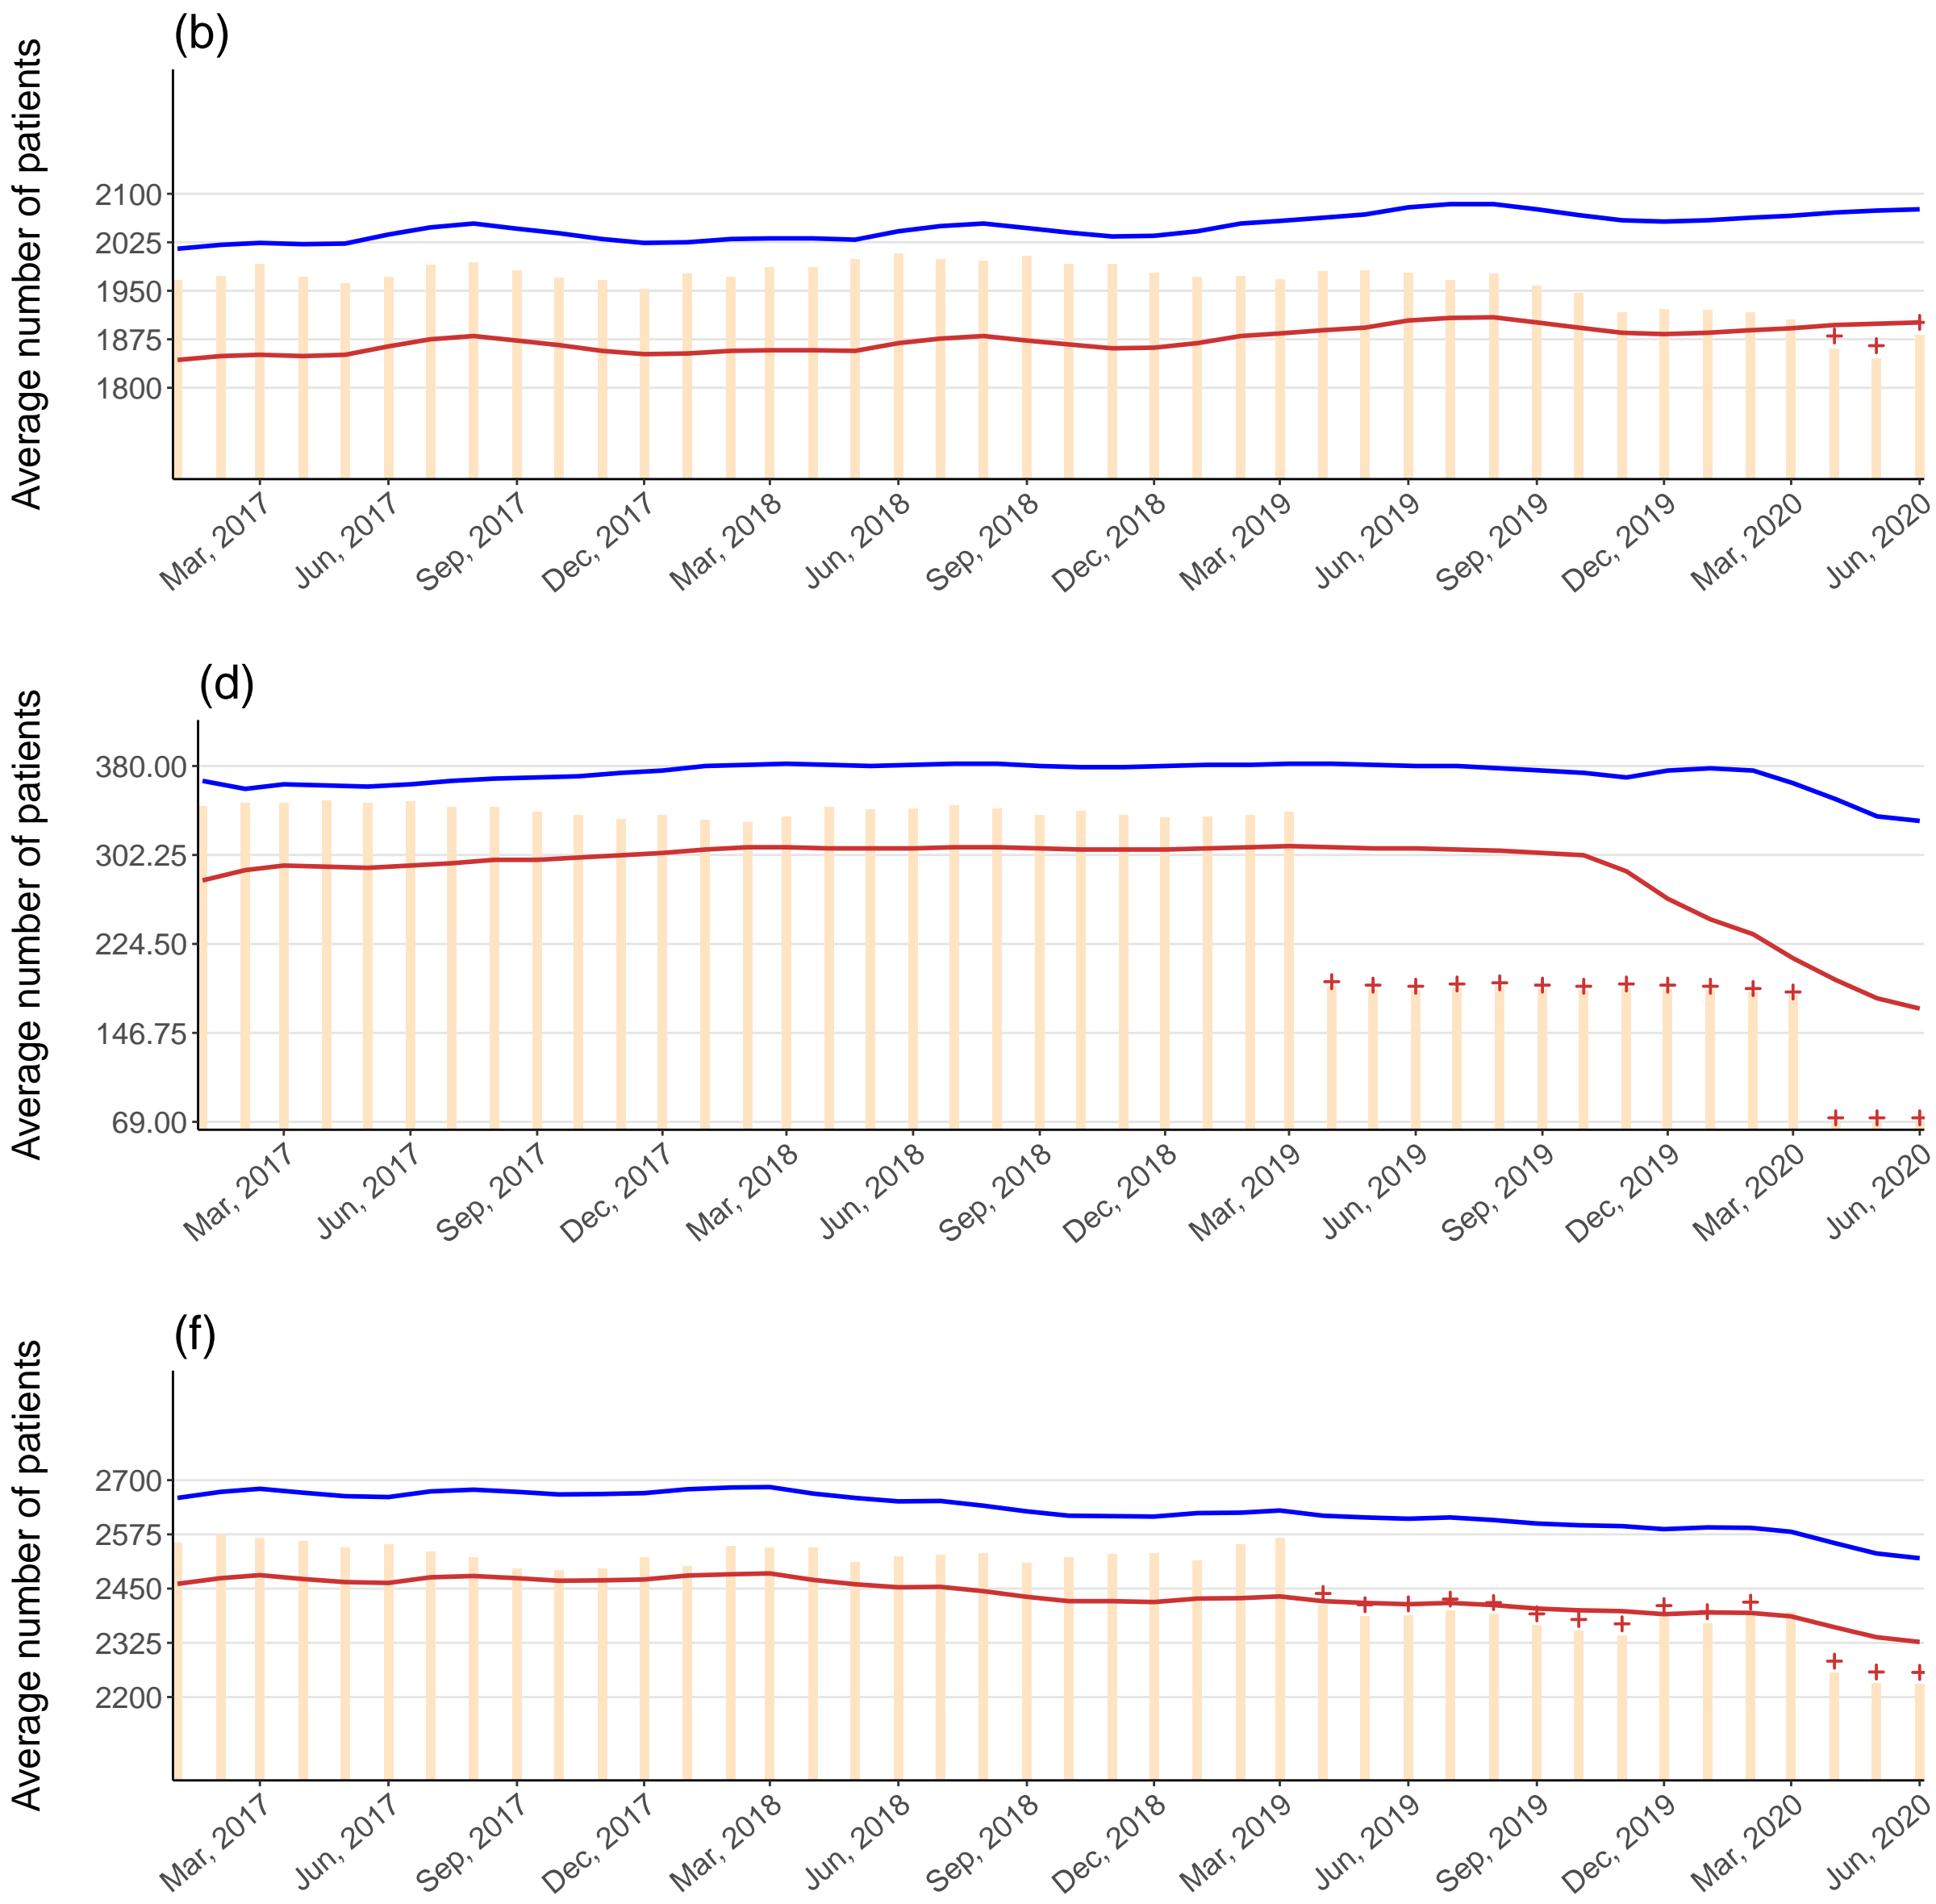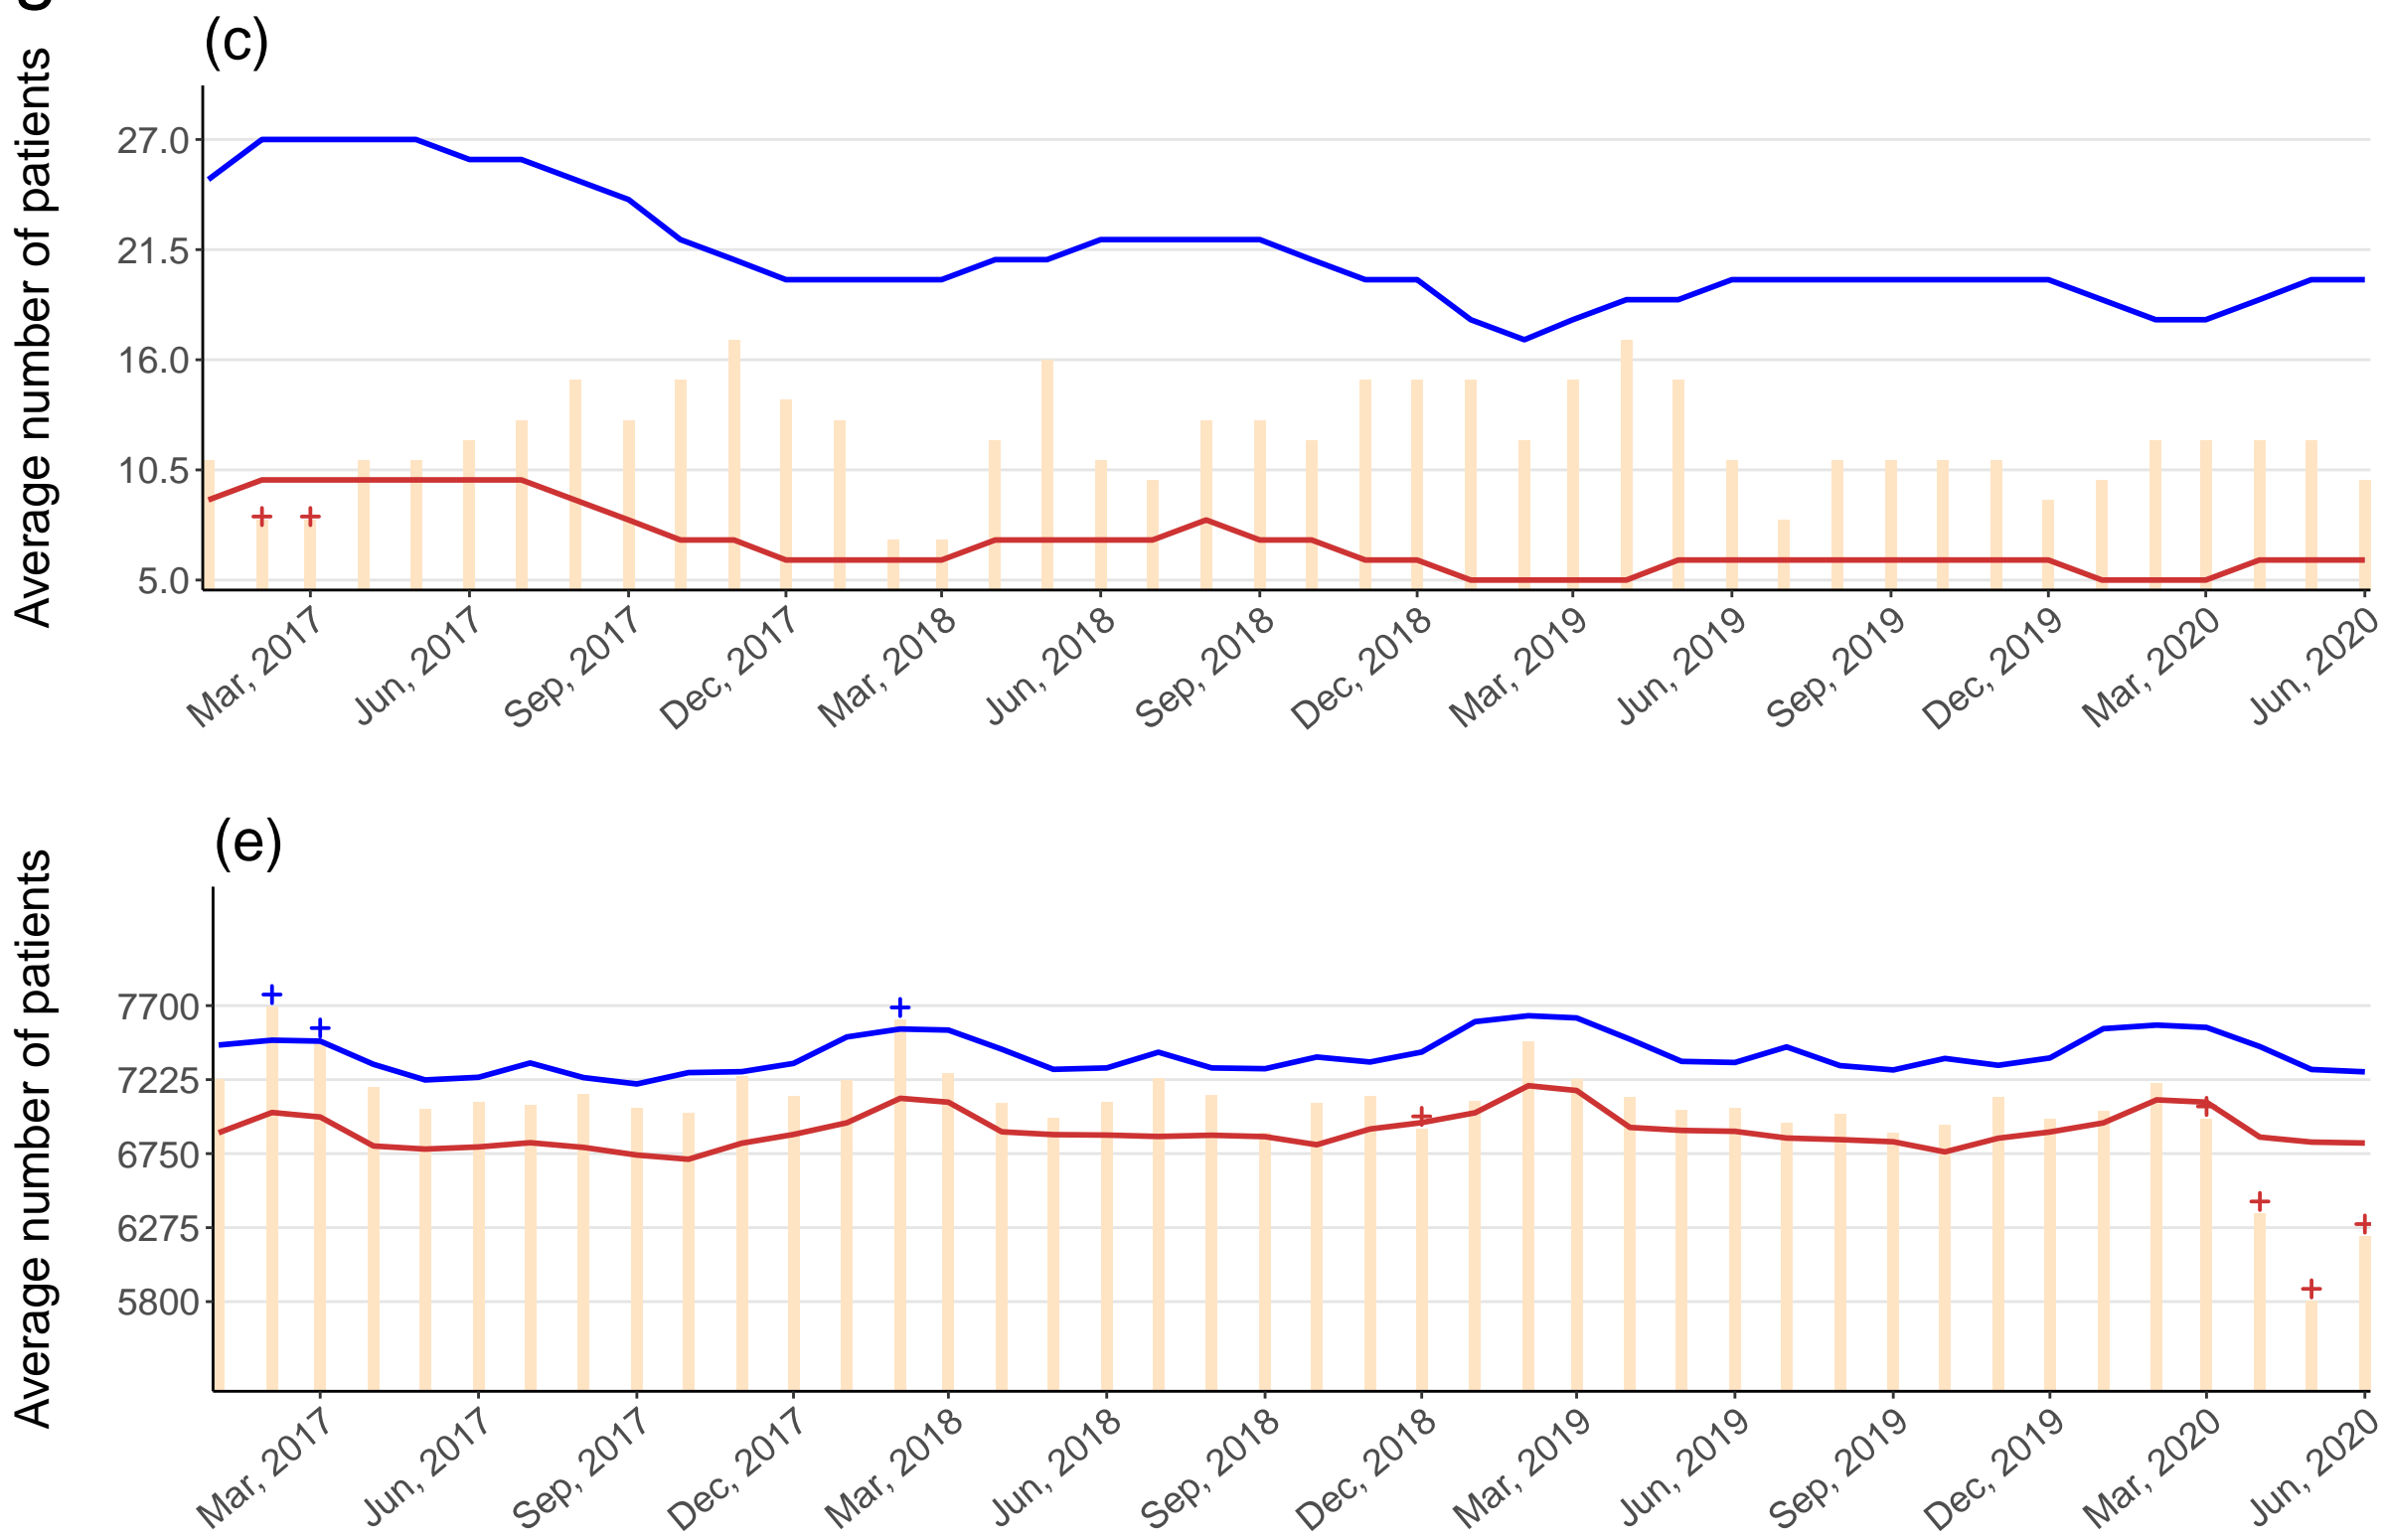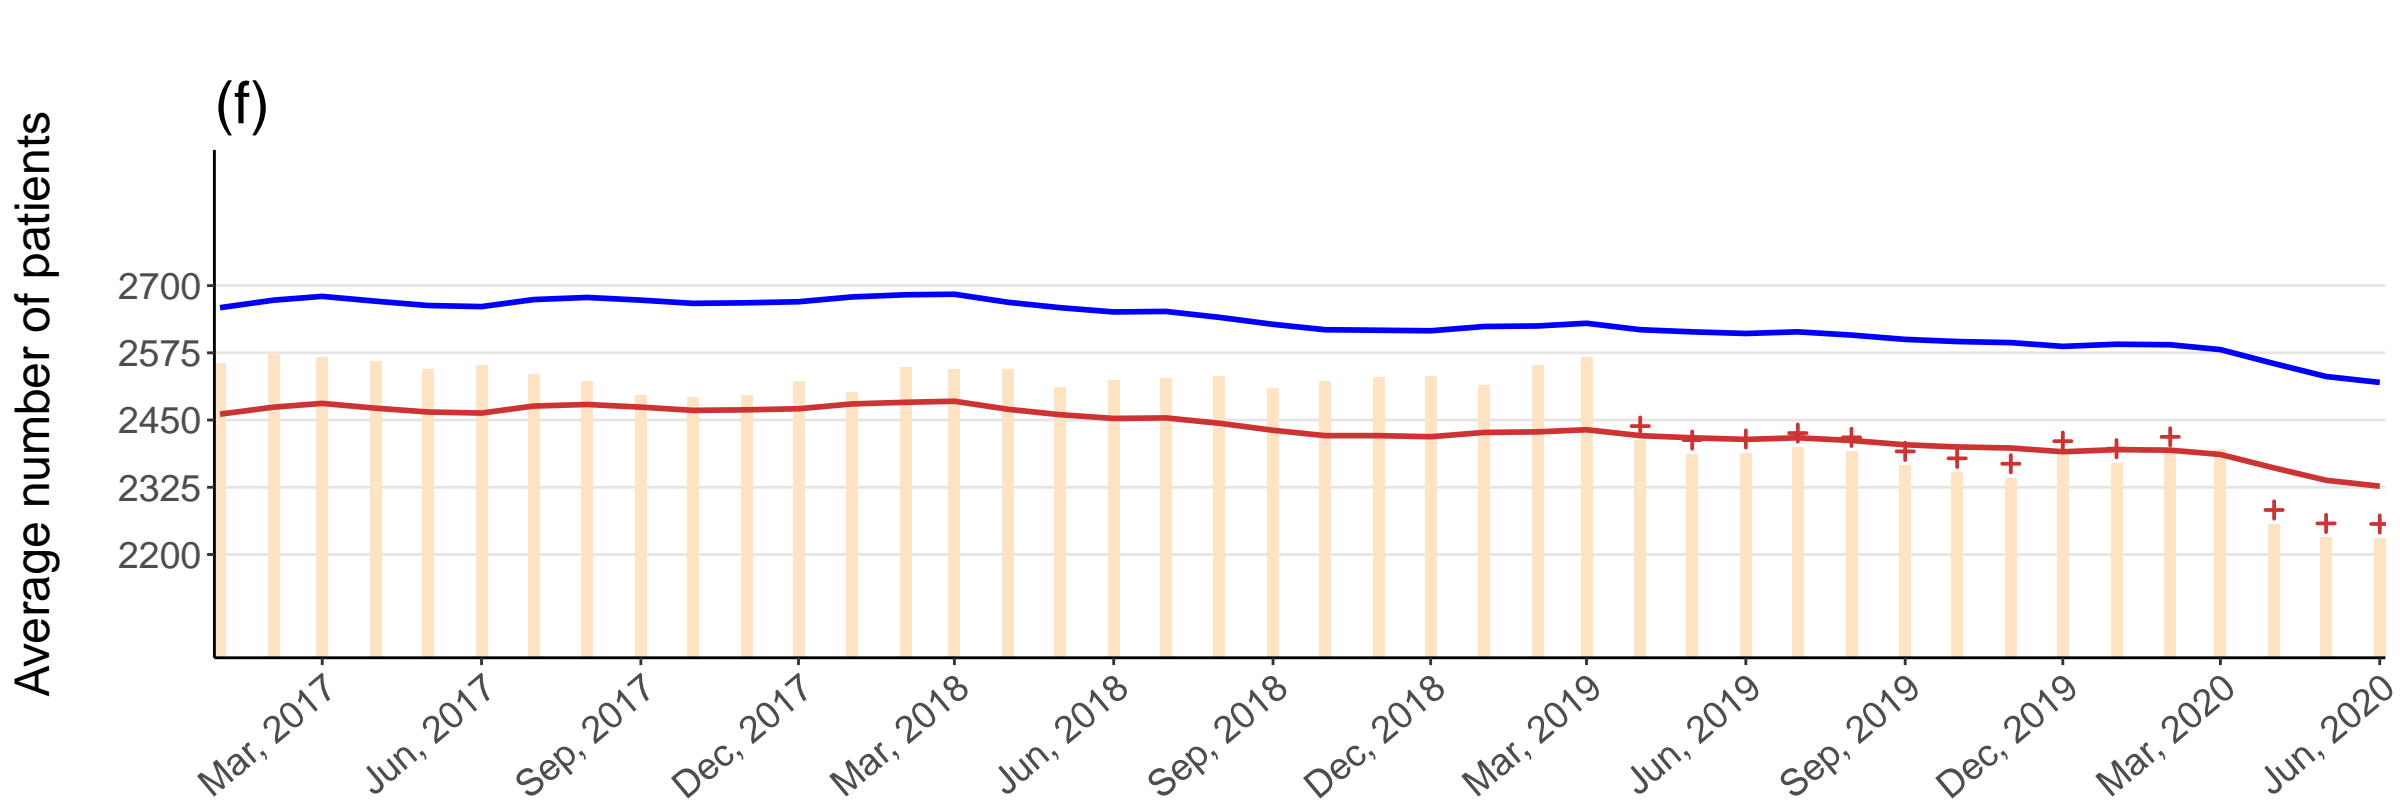

# Kyoto

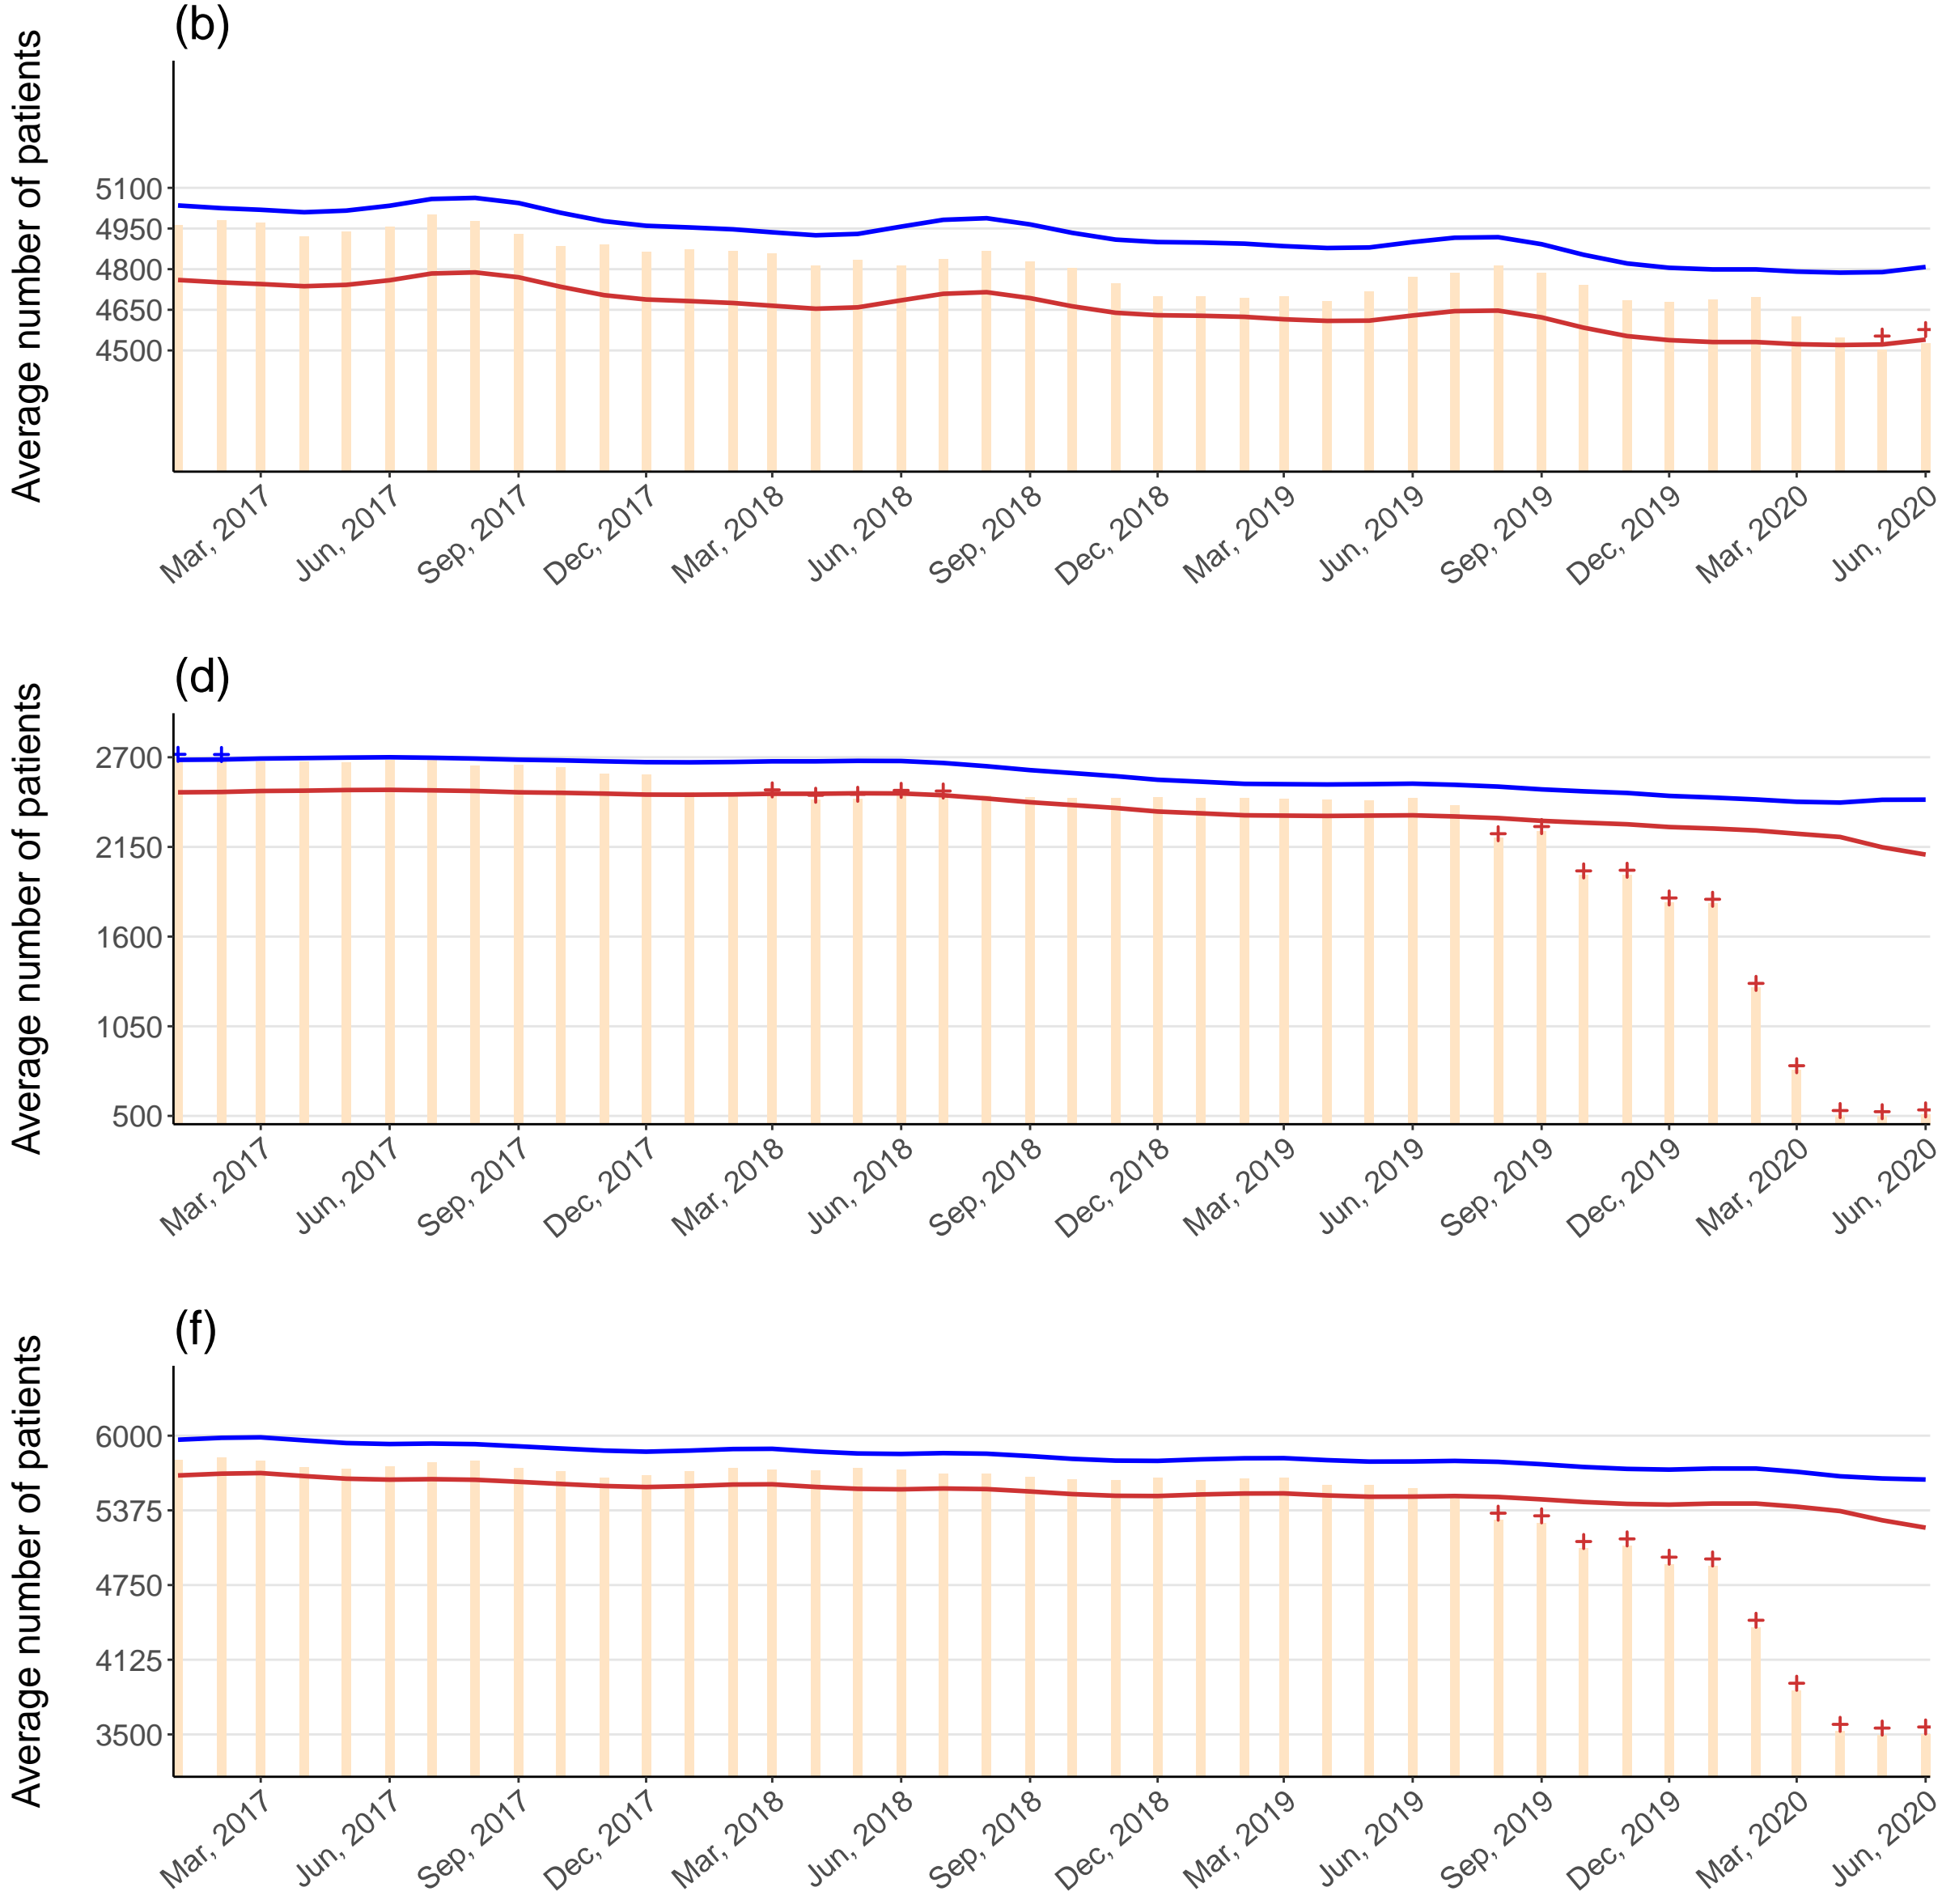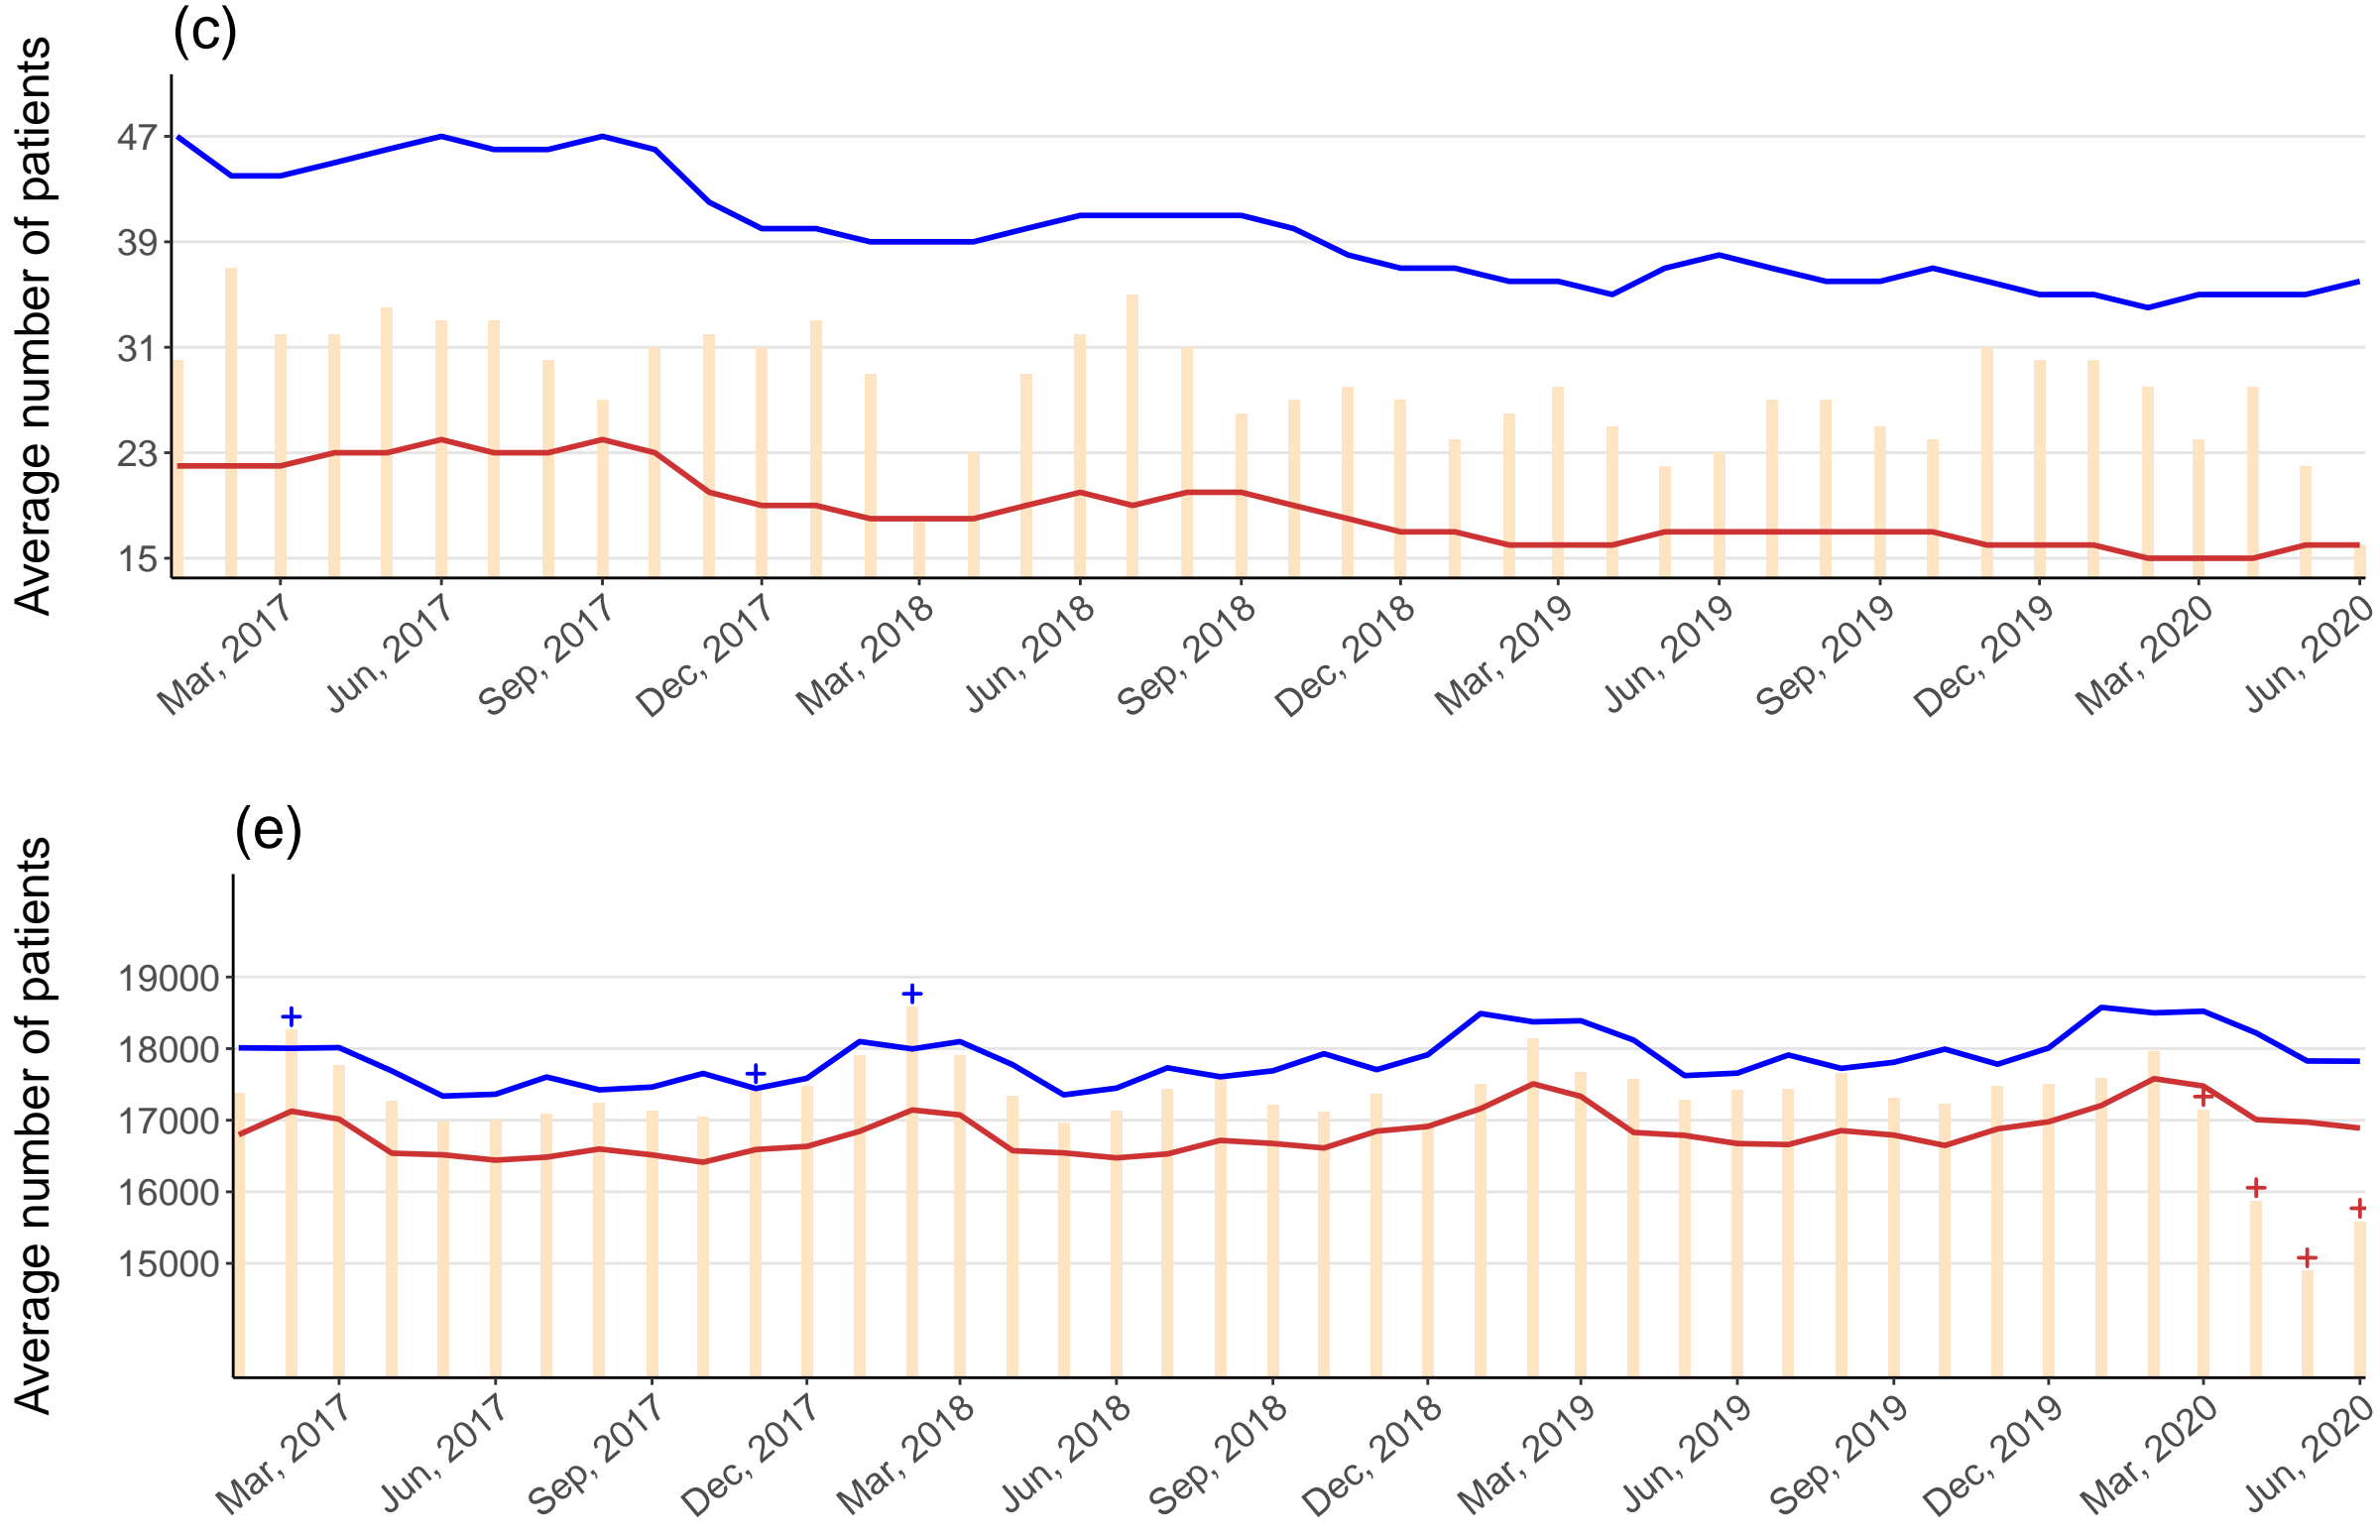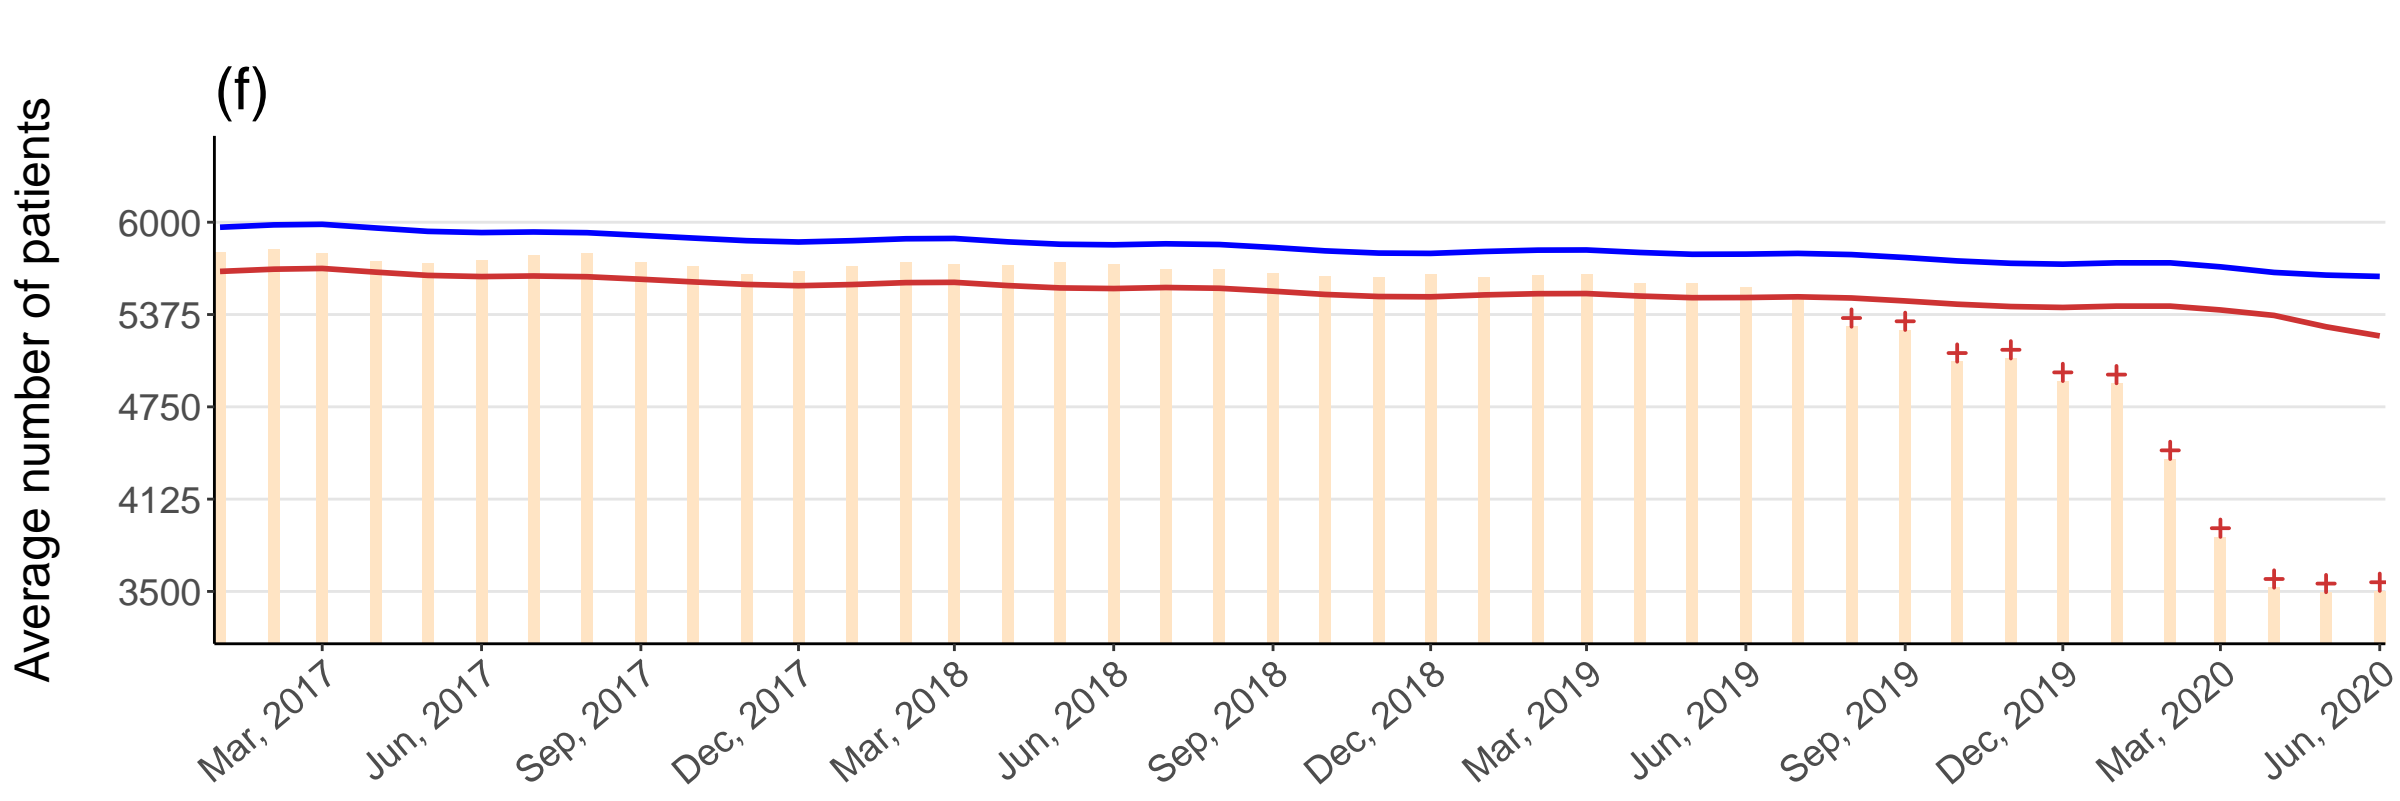

# Osaka

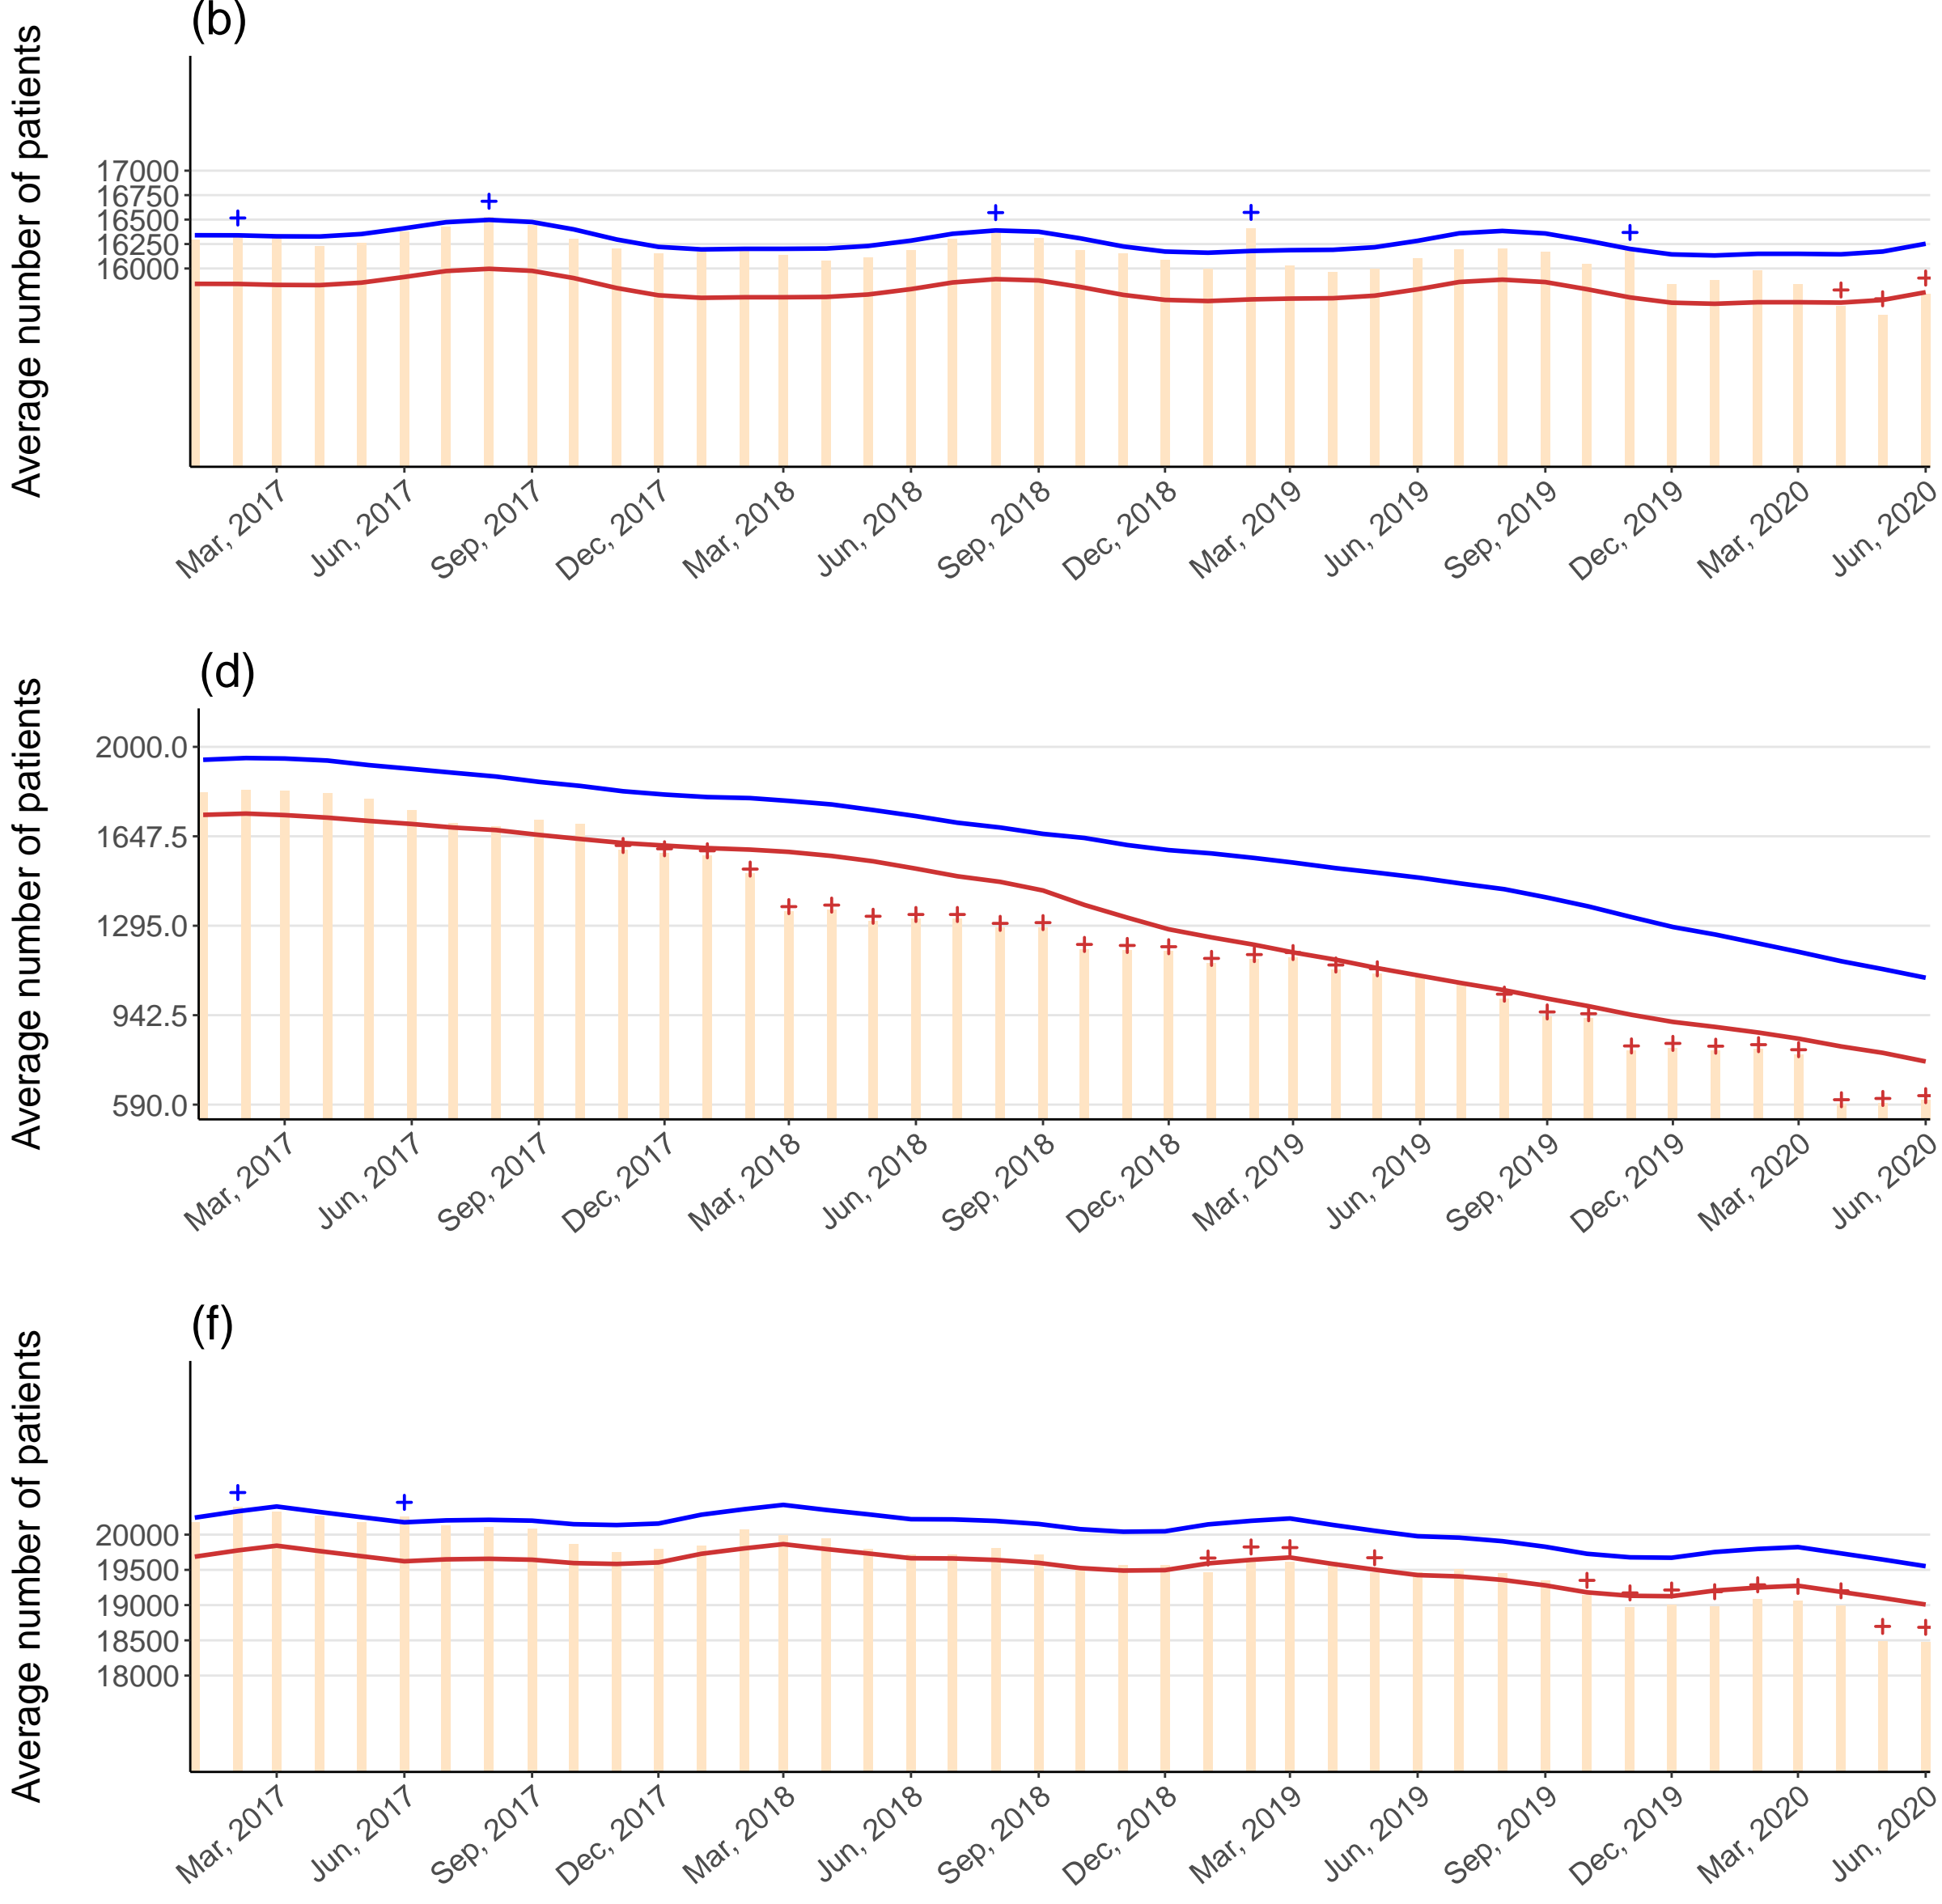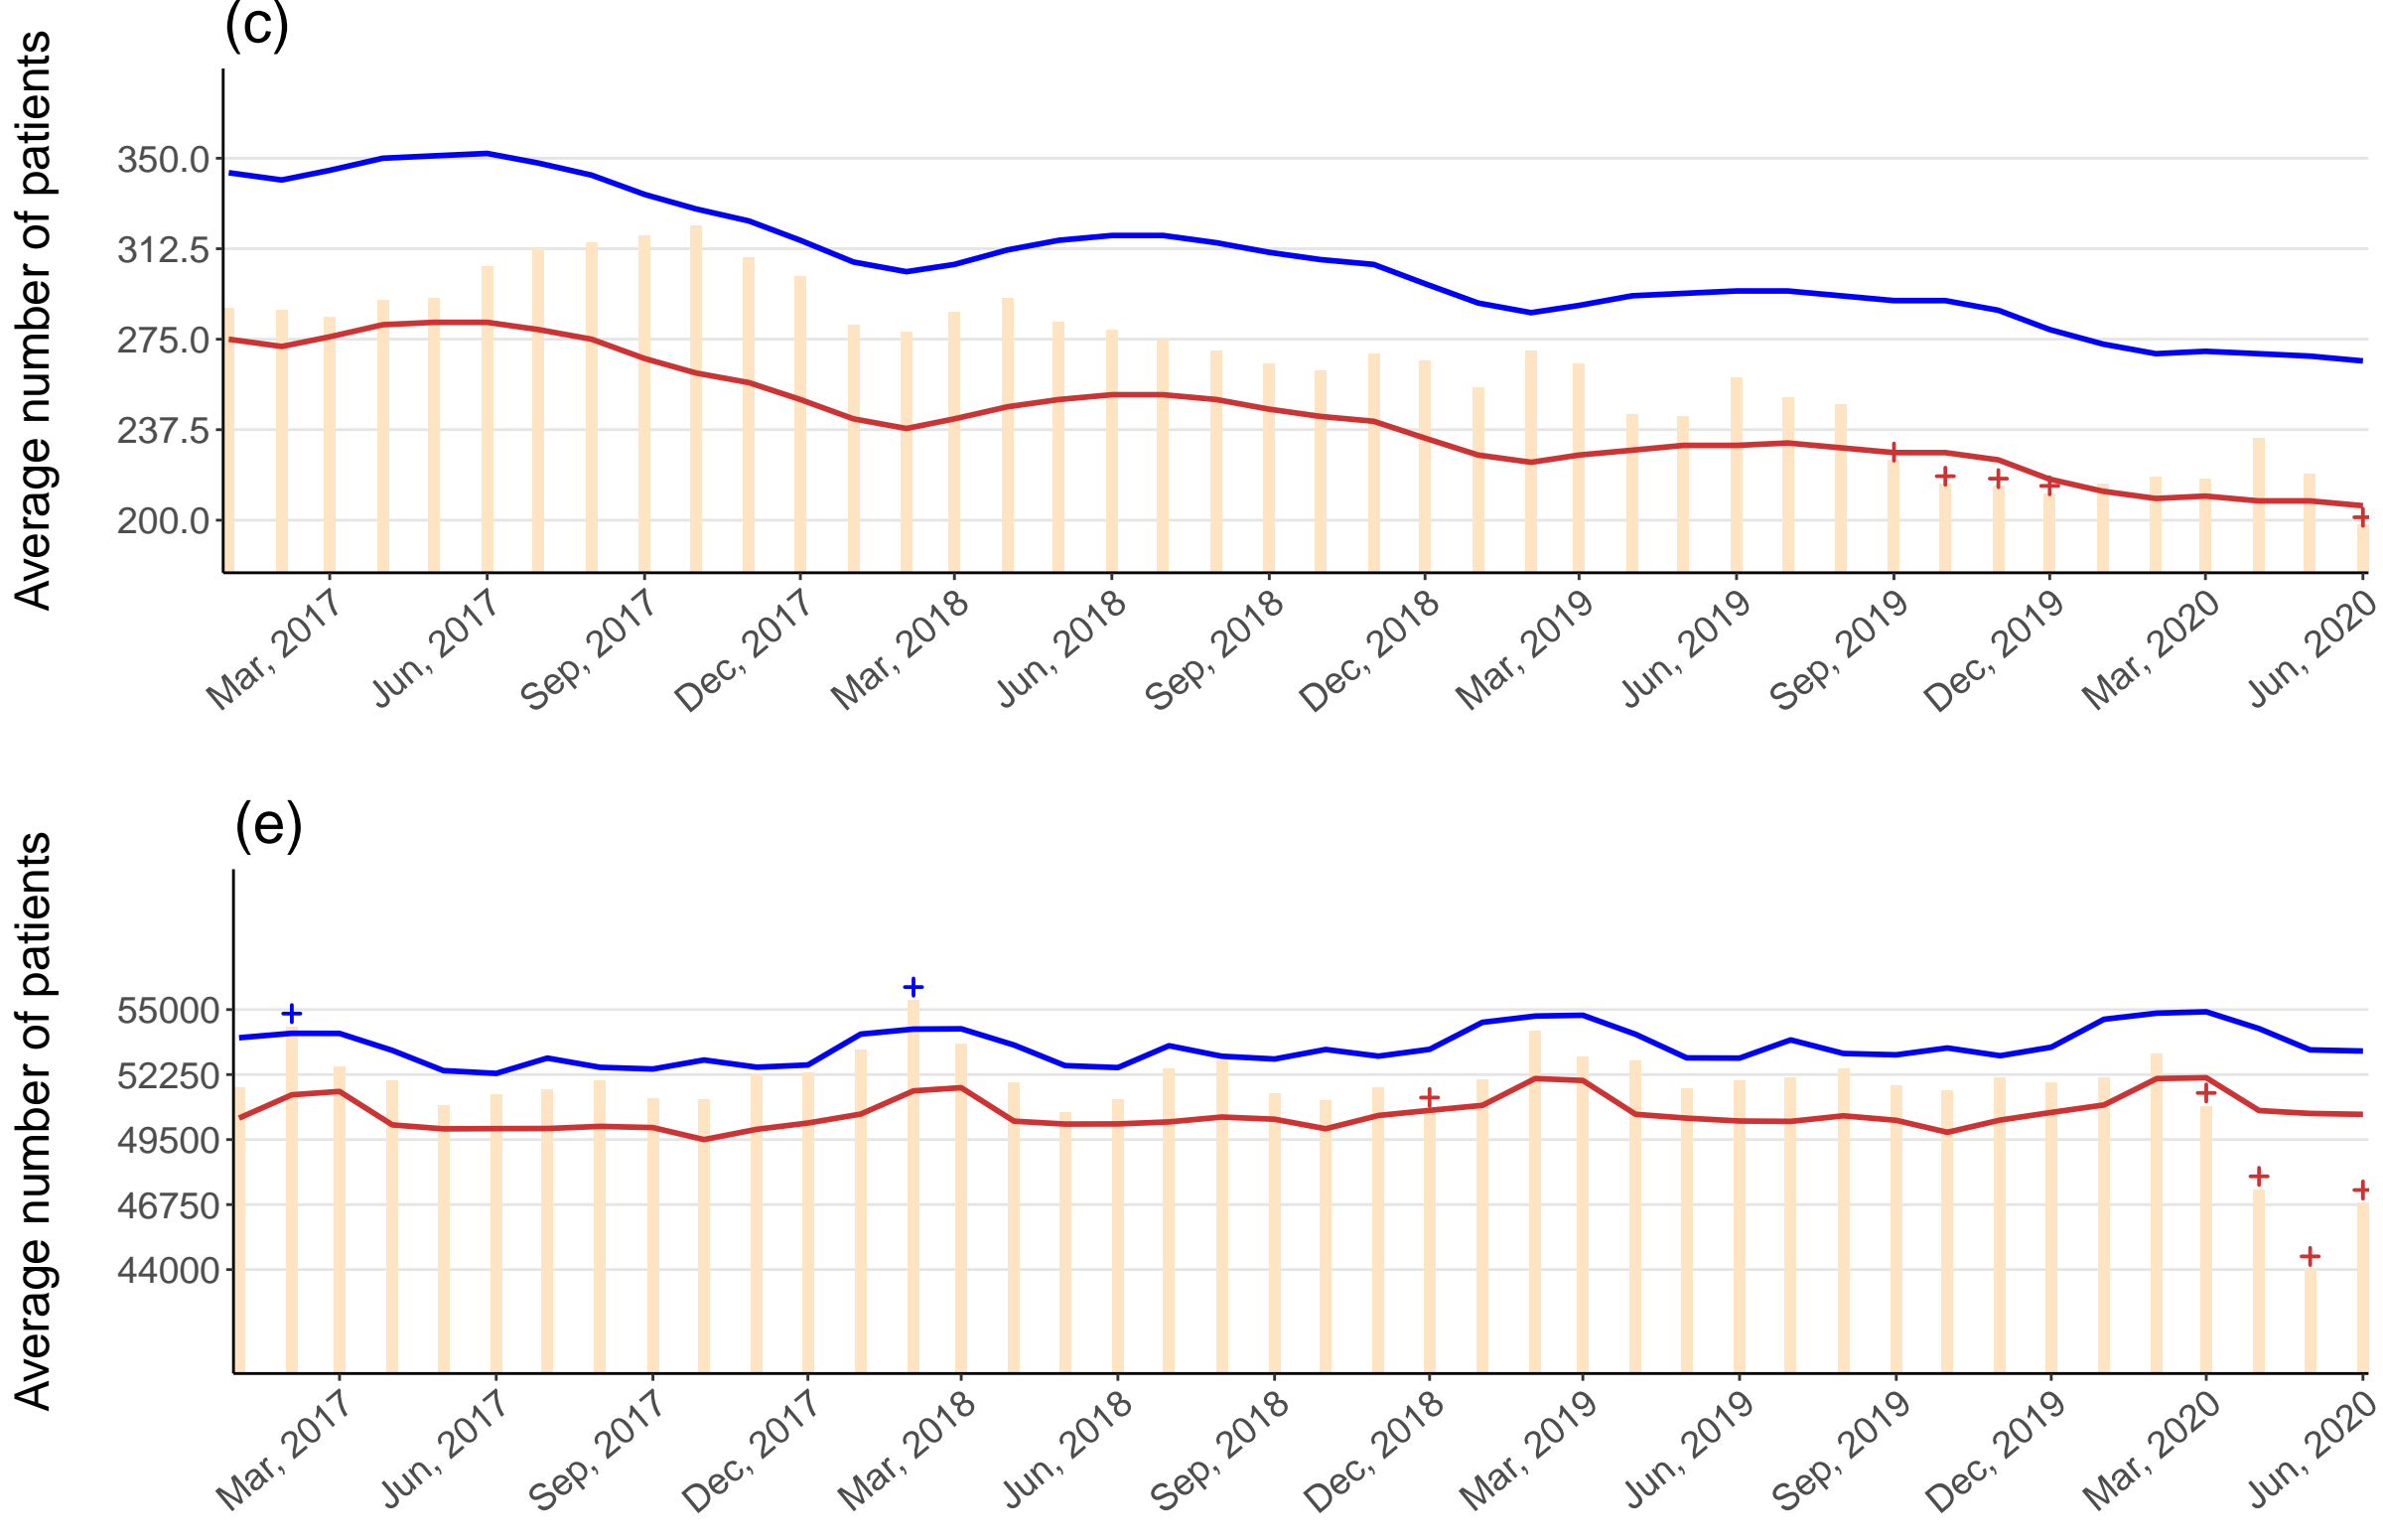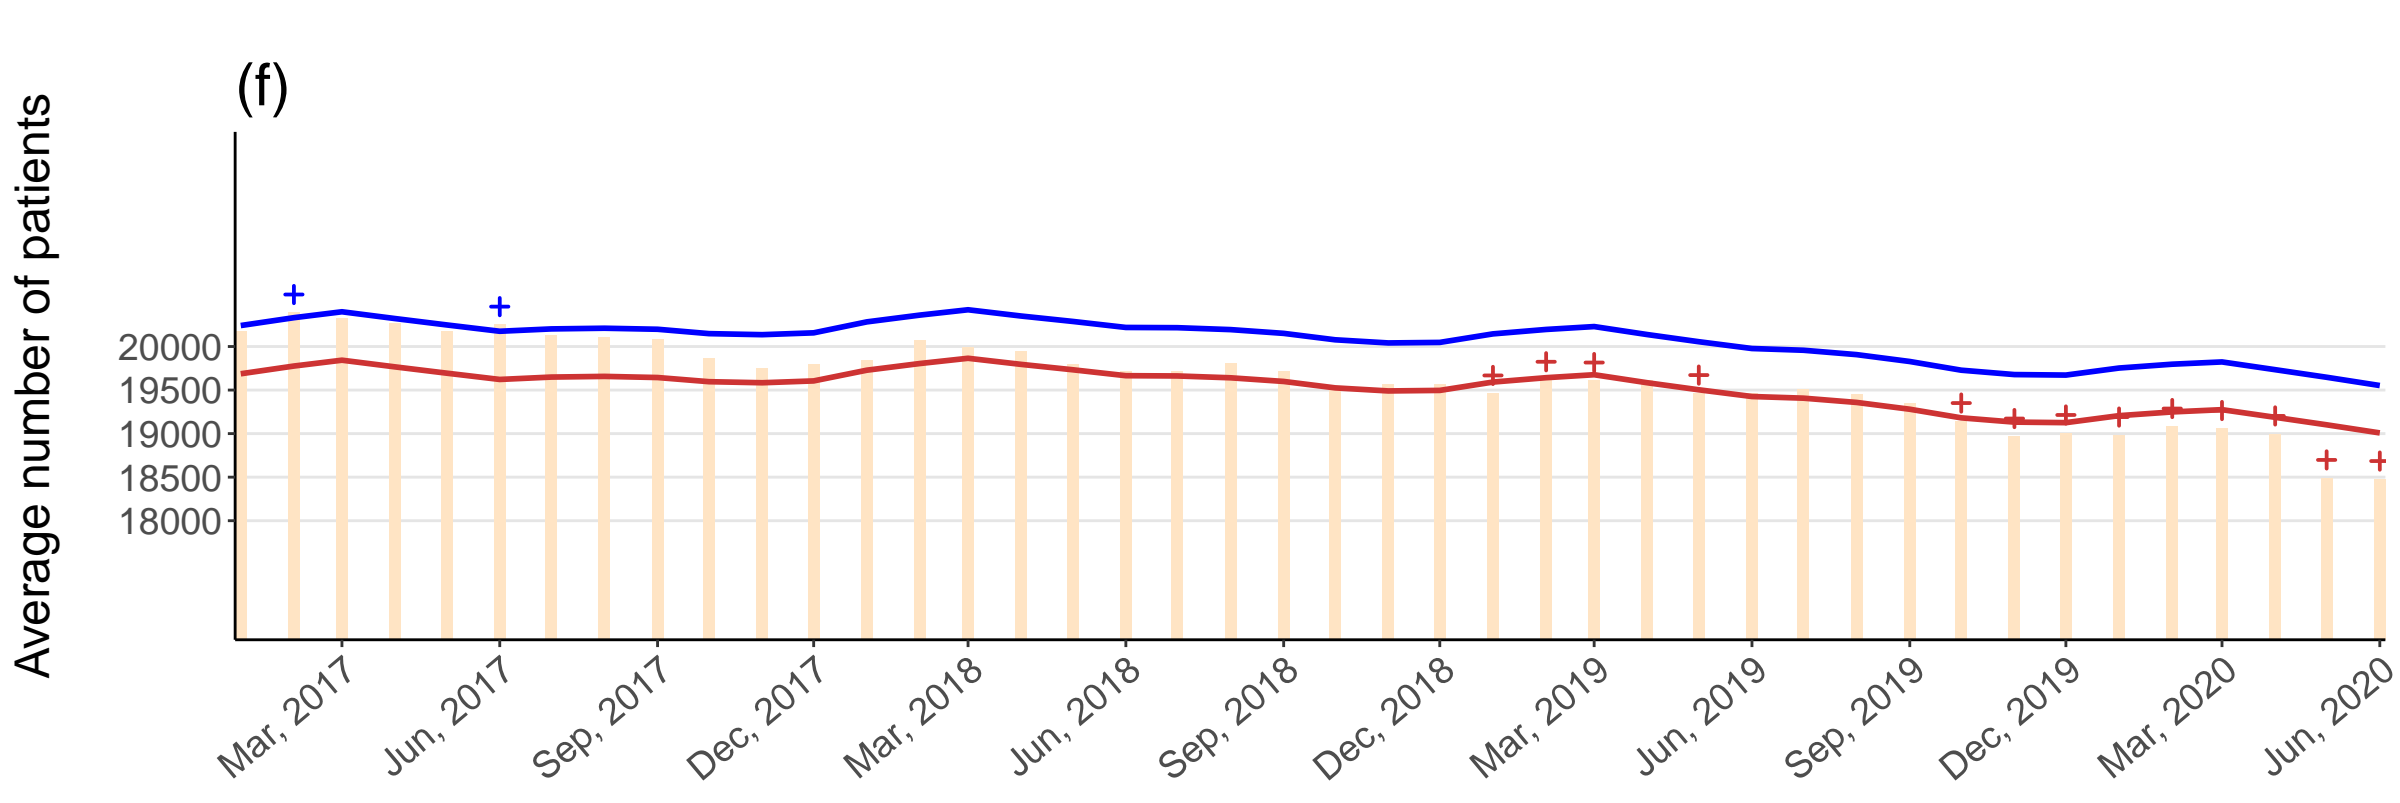



## Hyogo

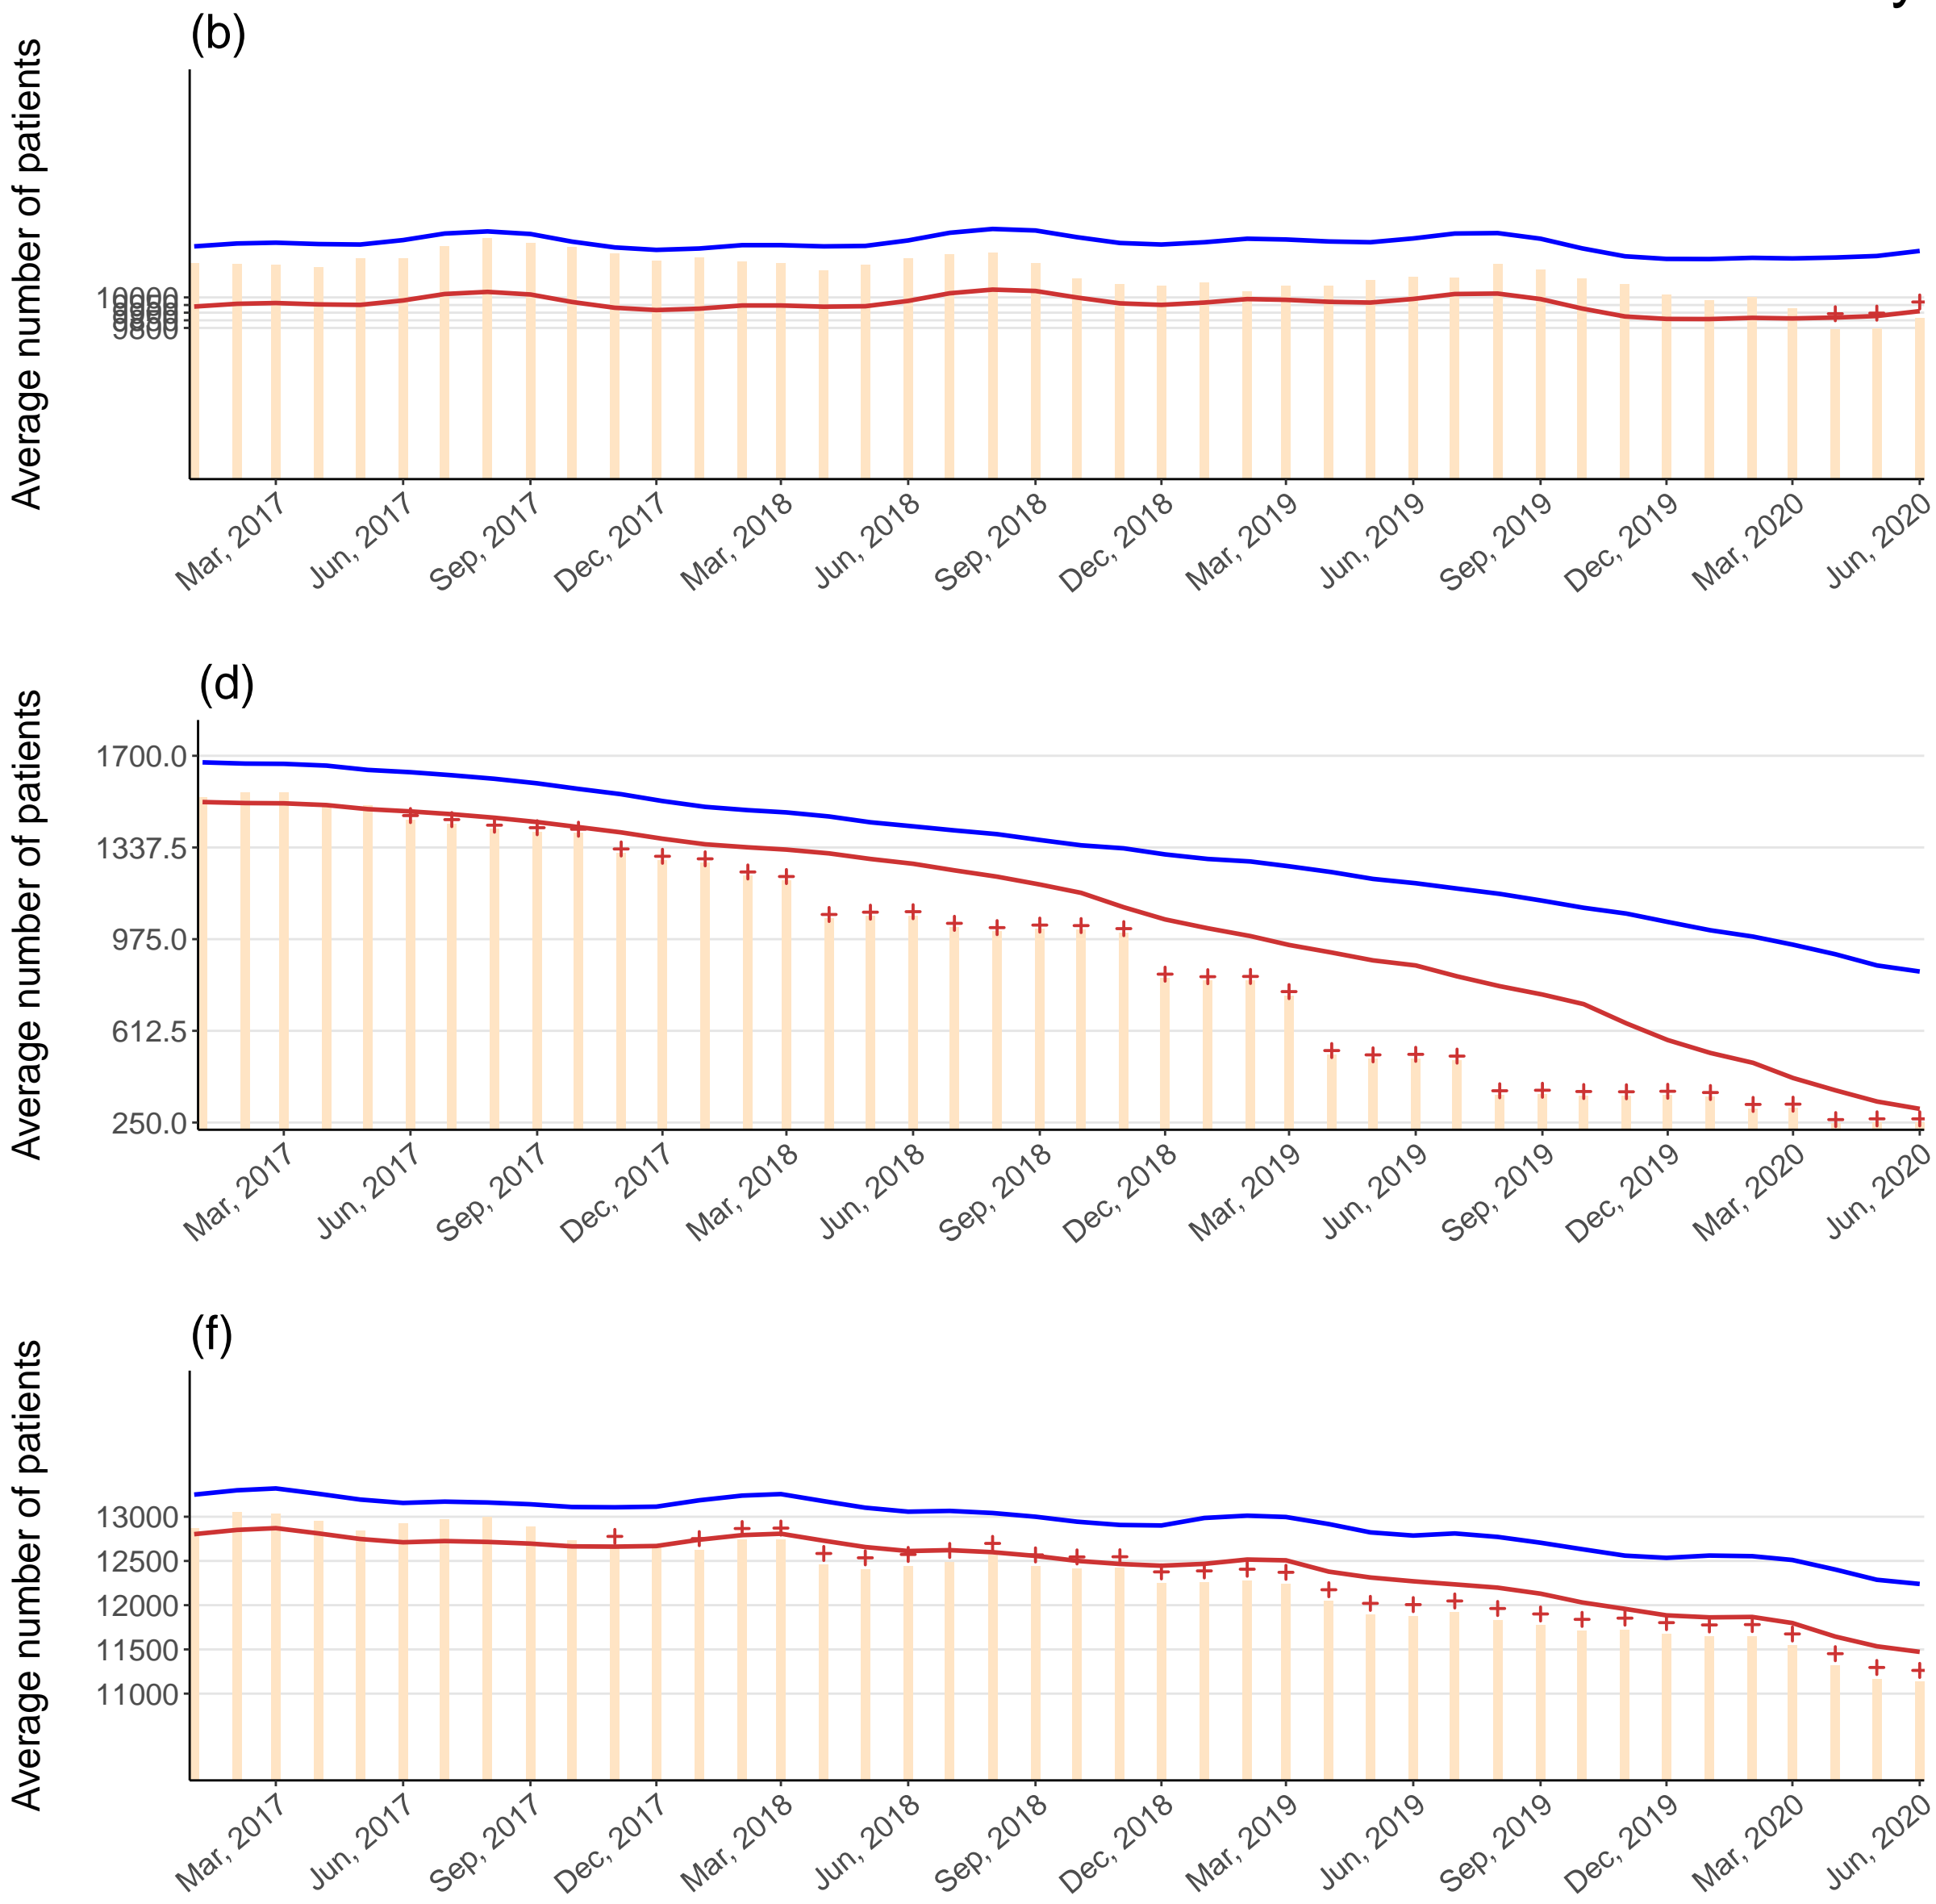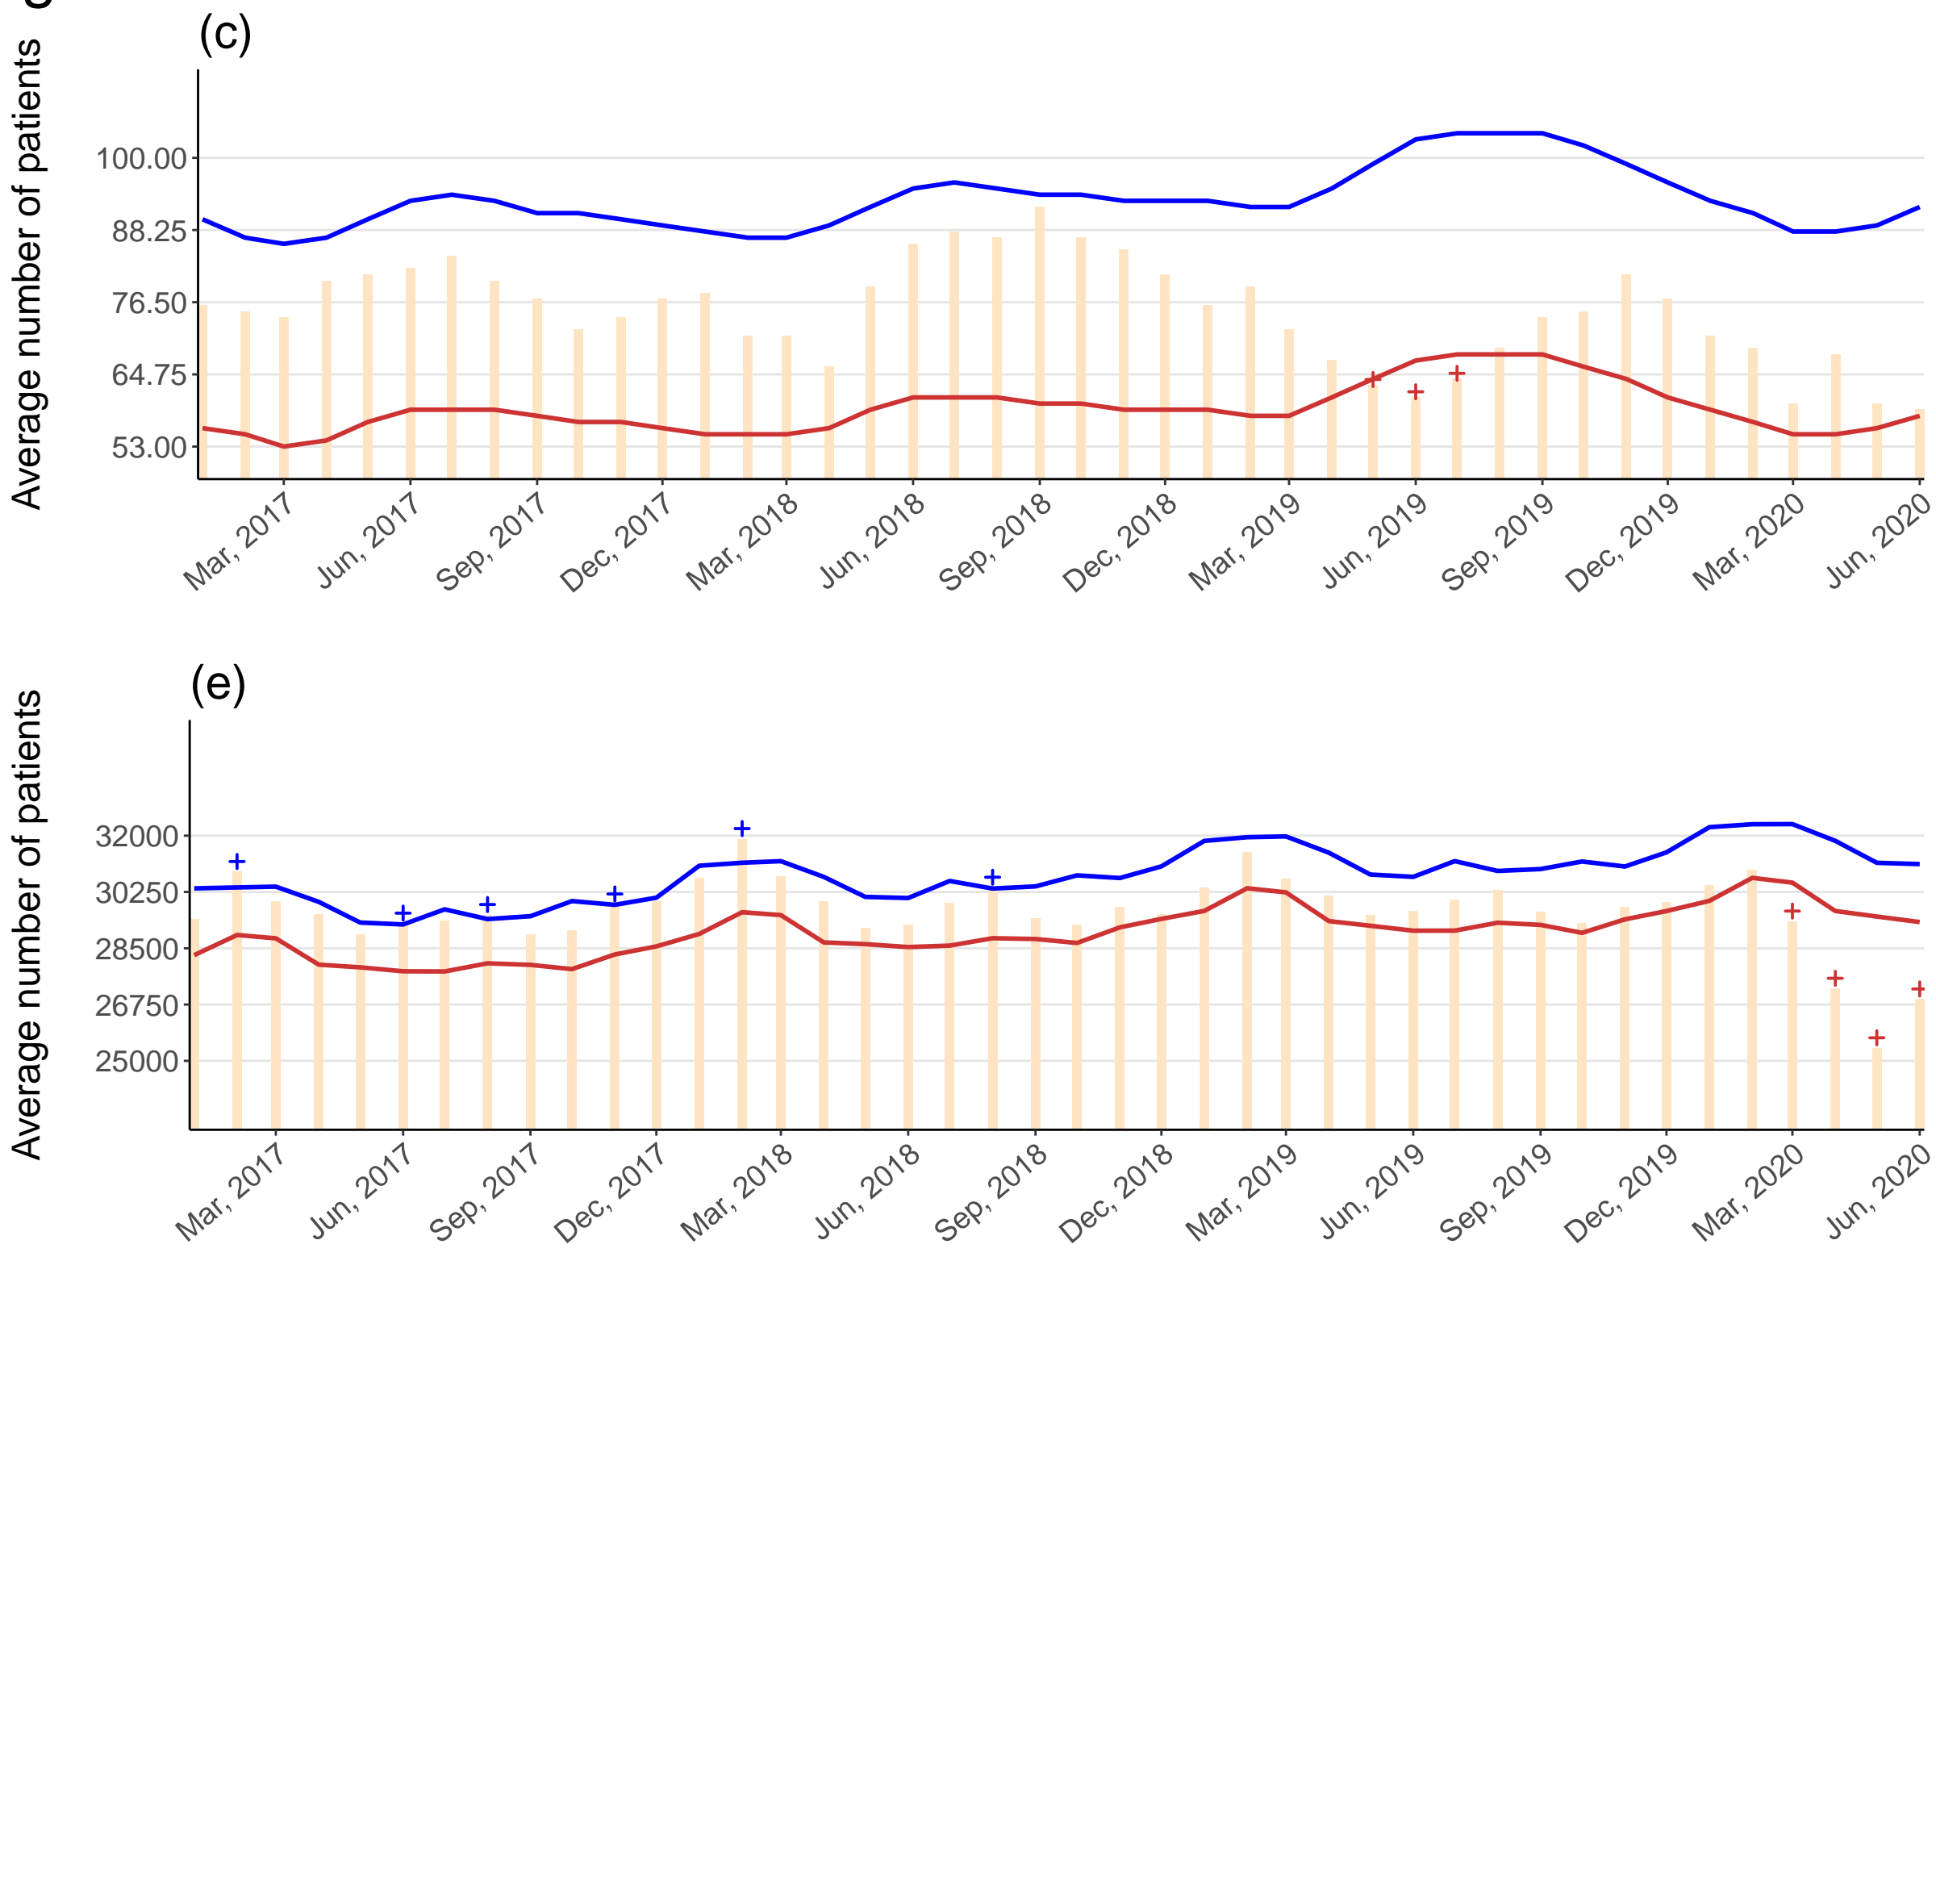

Nara

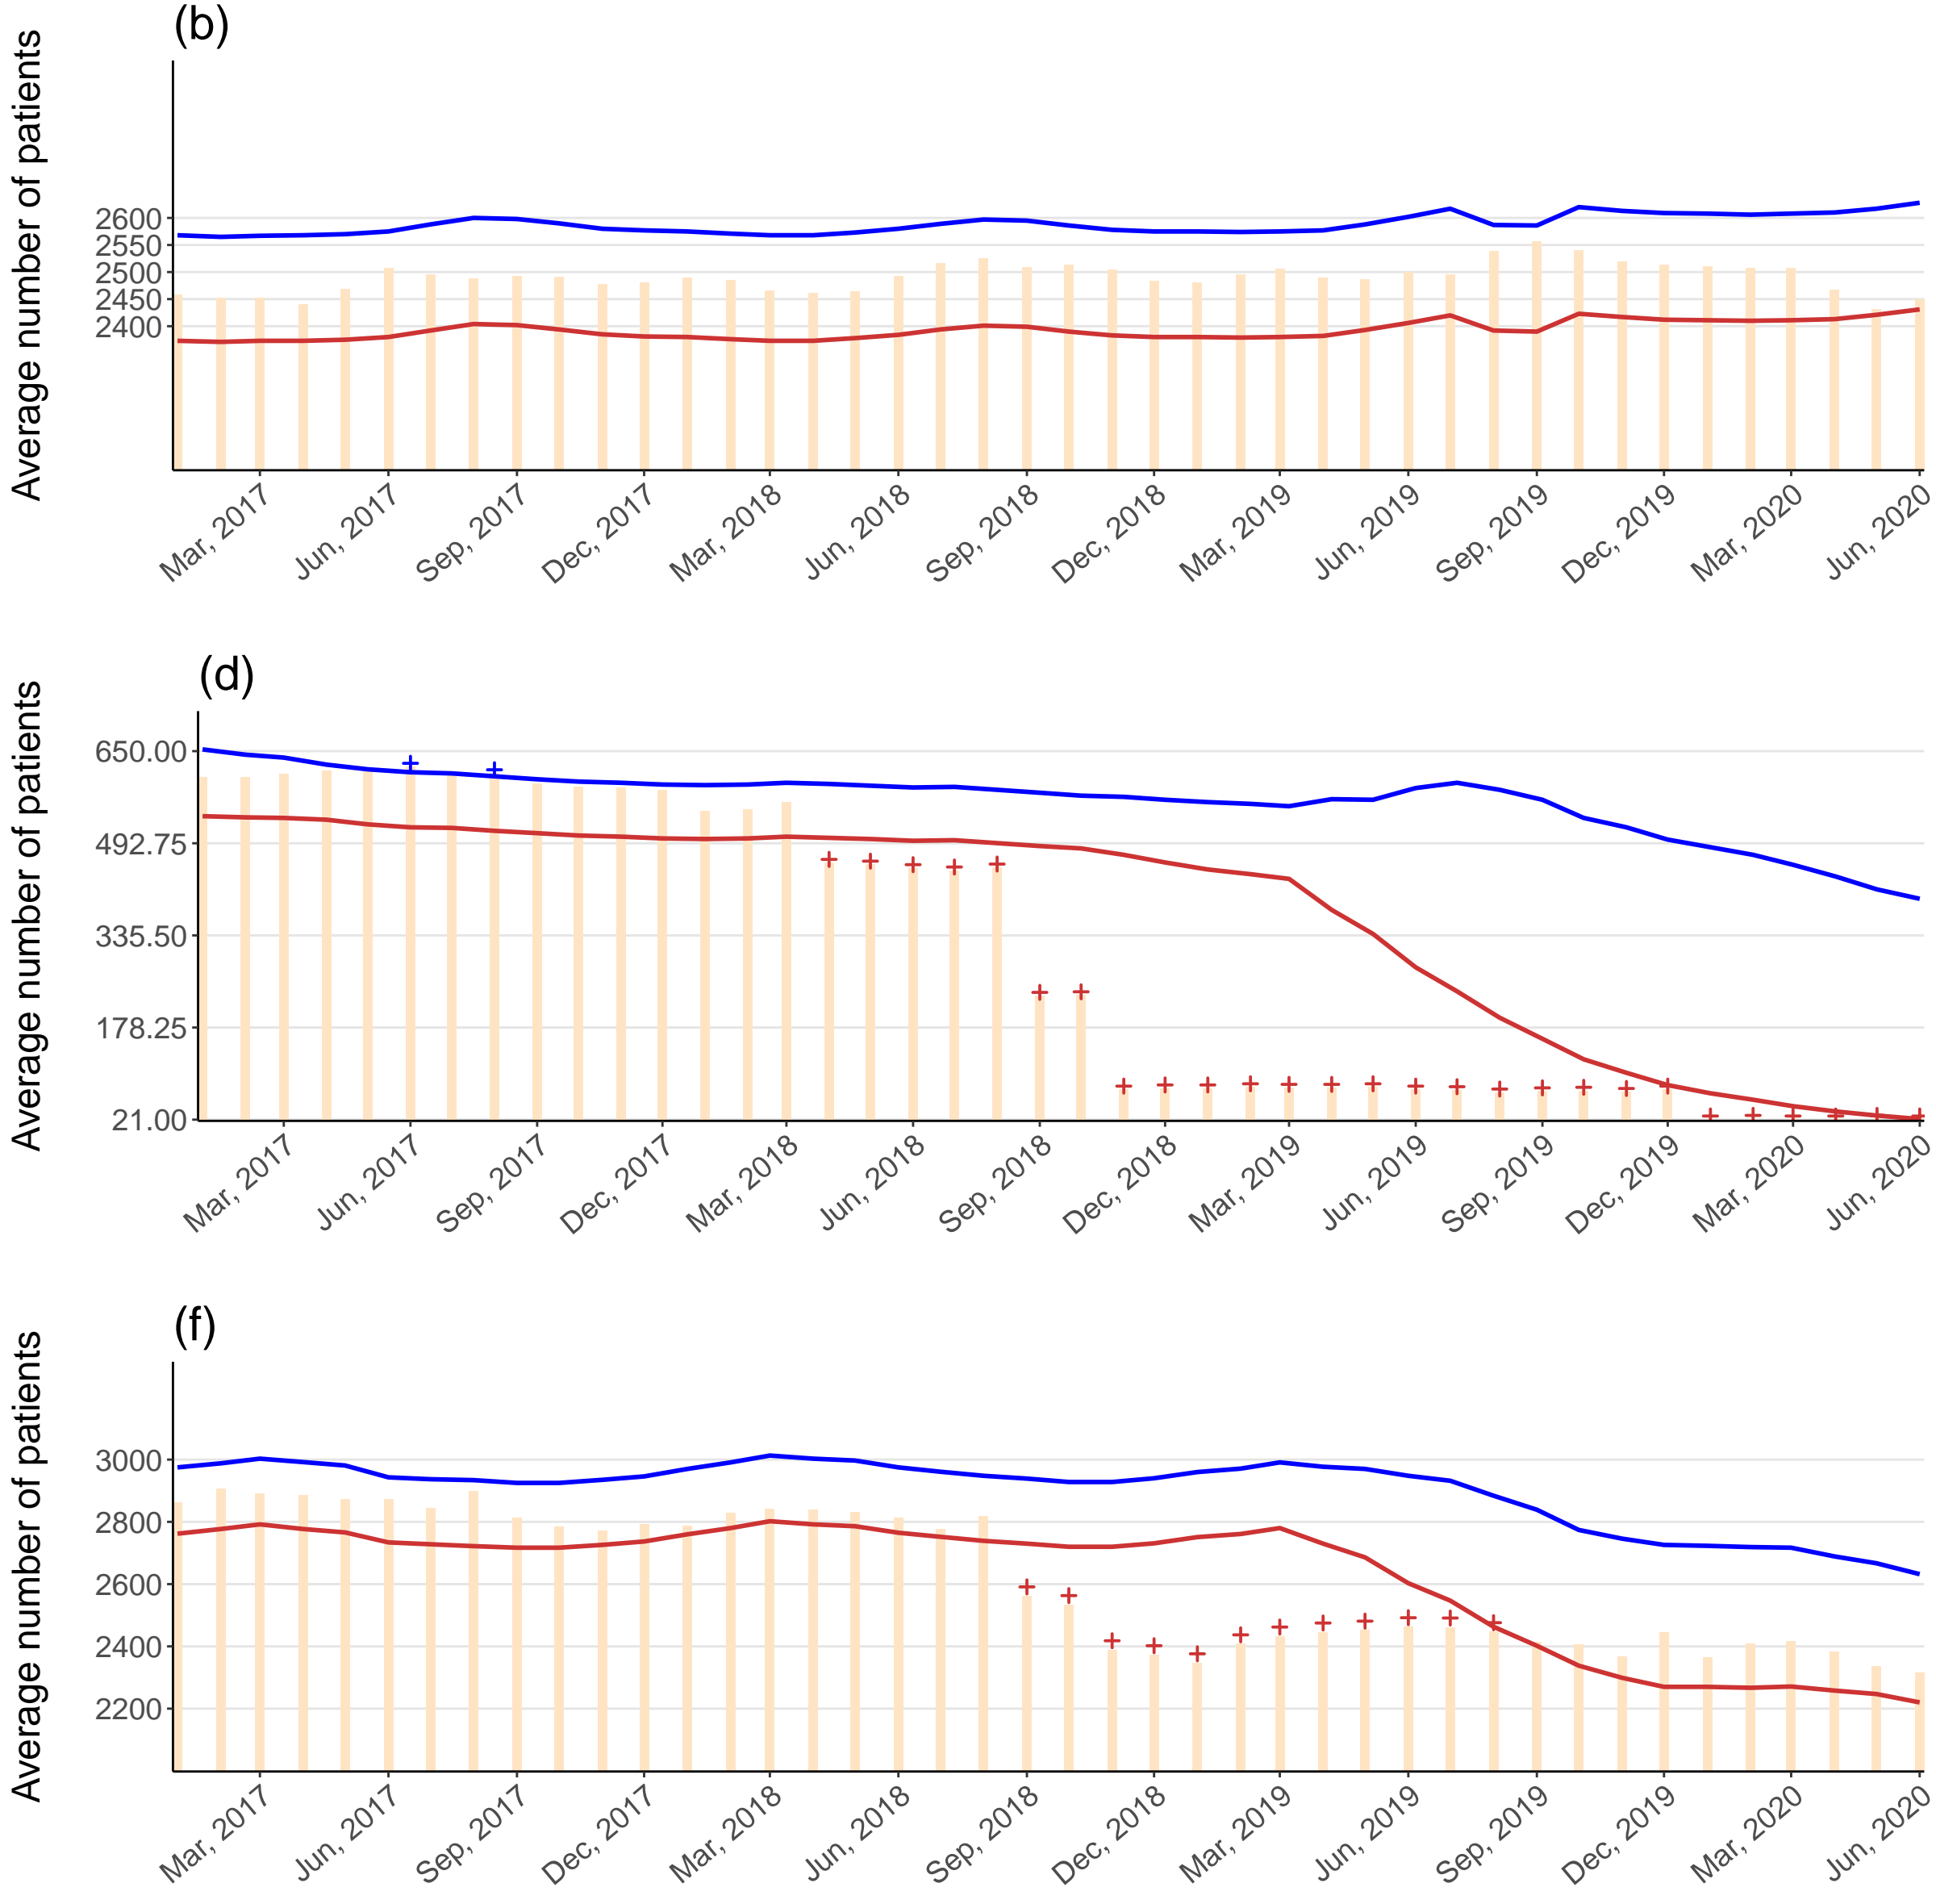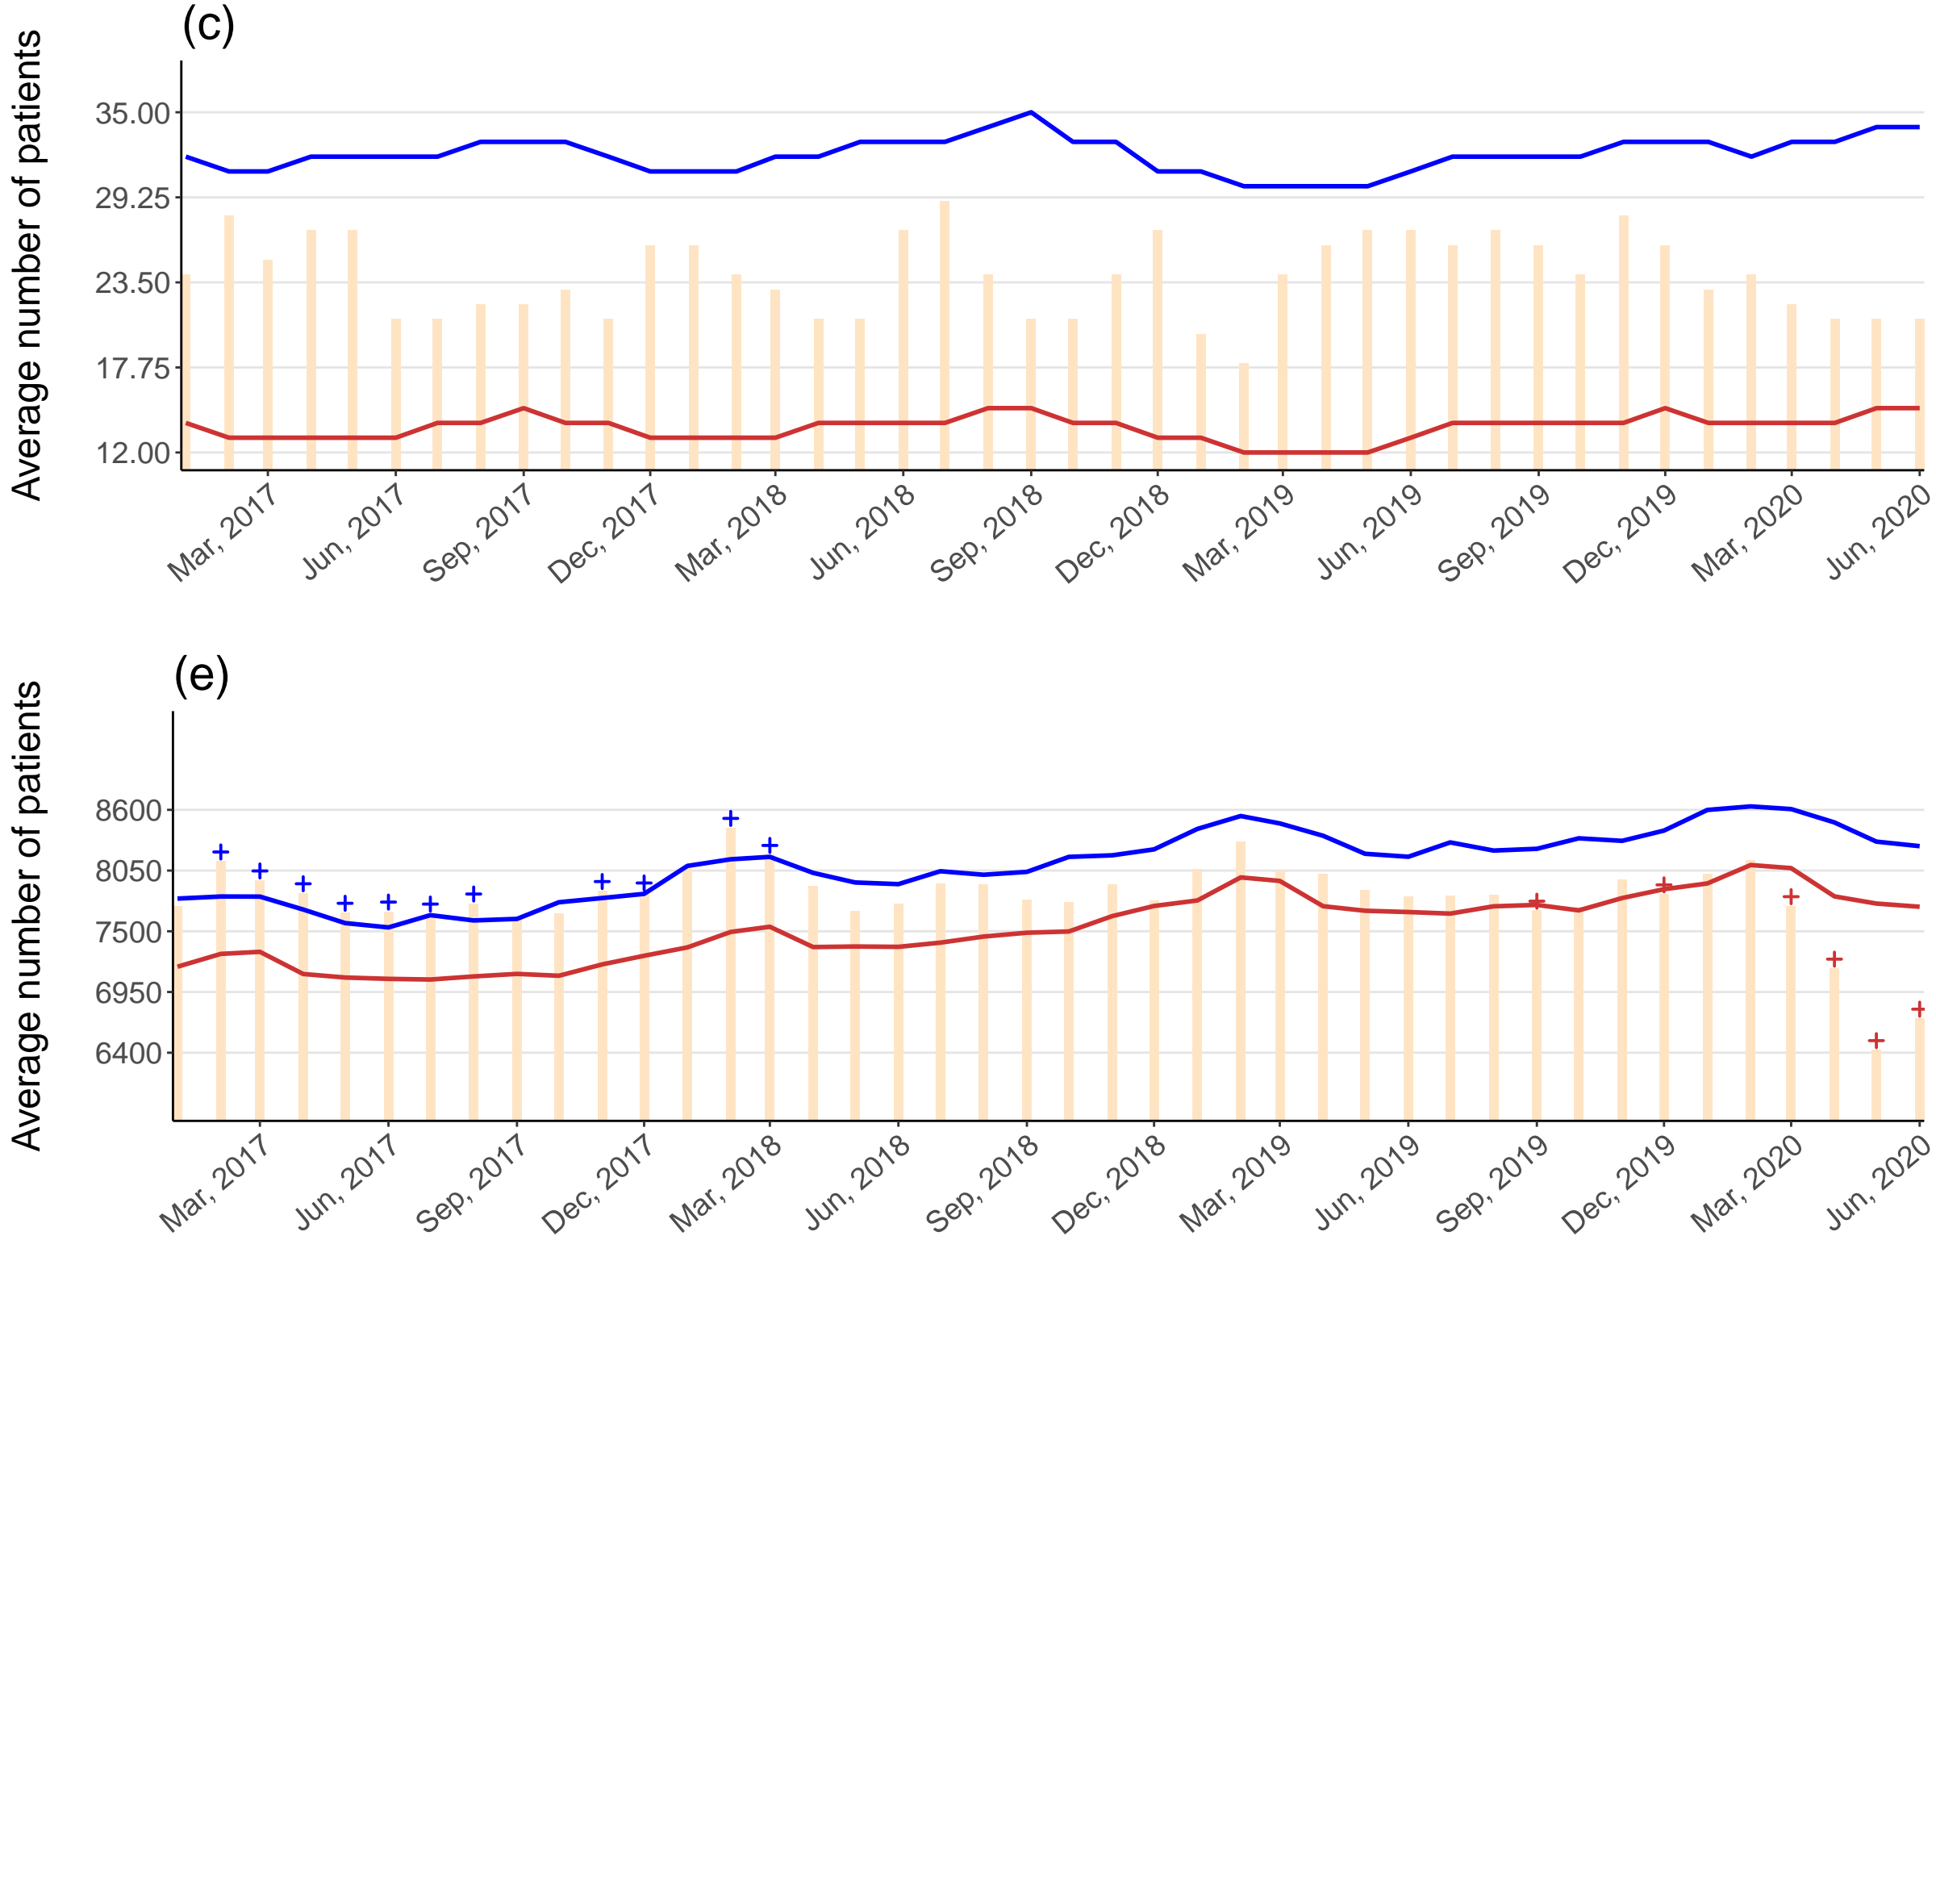

# Wakayama

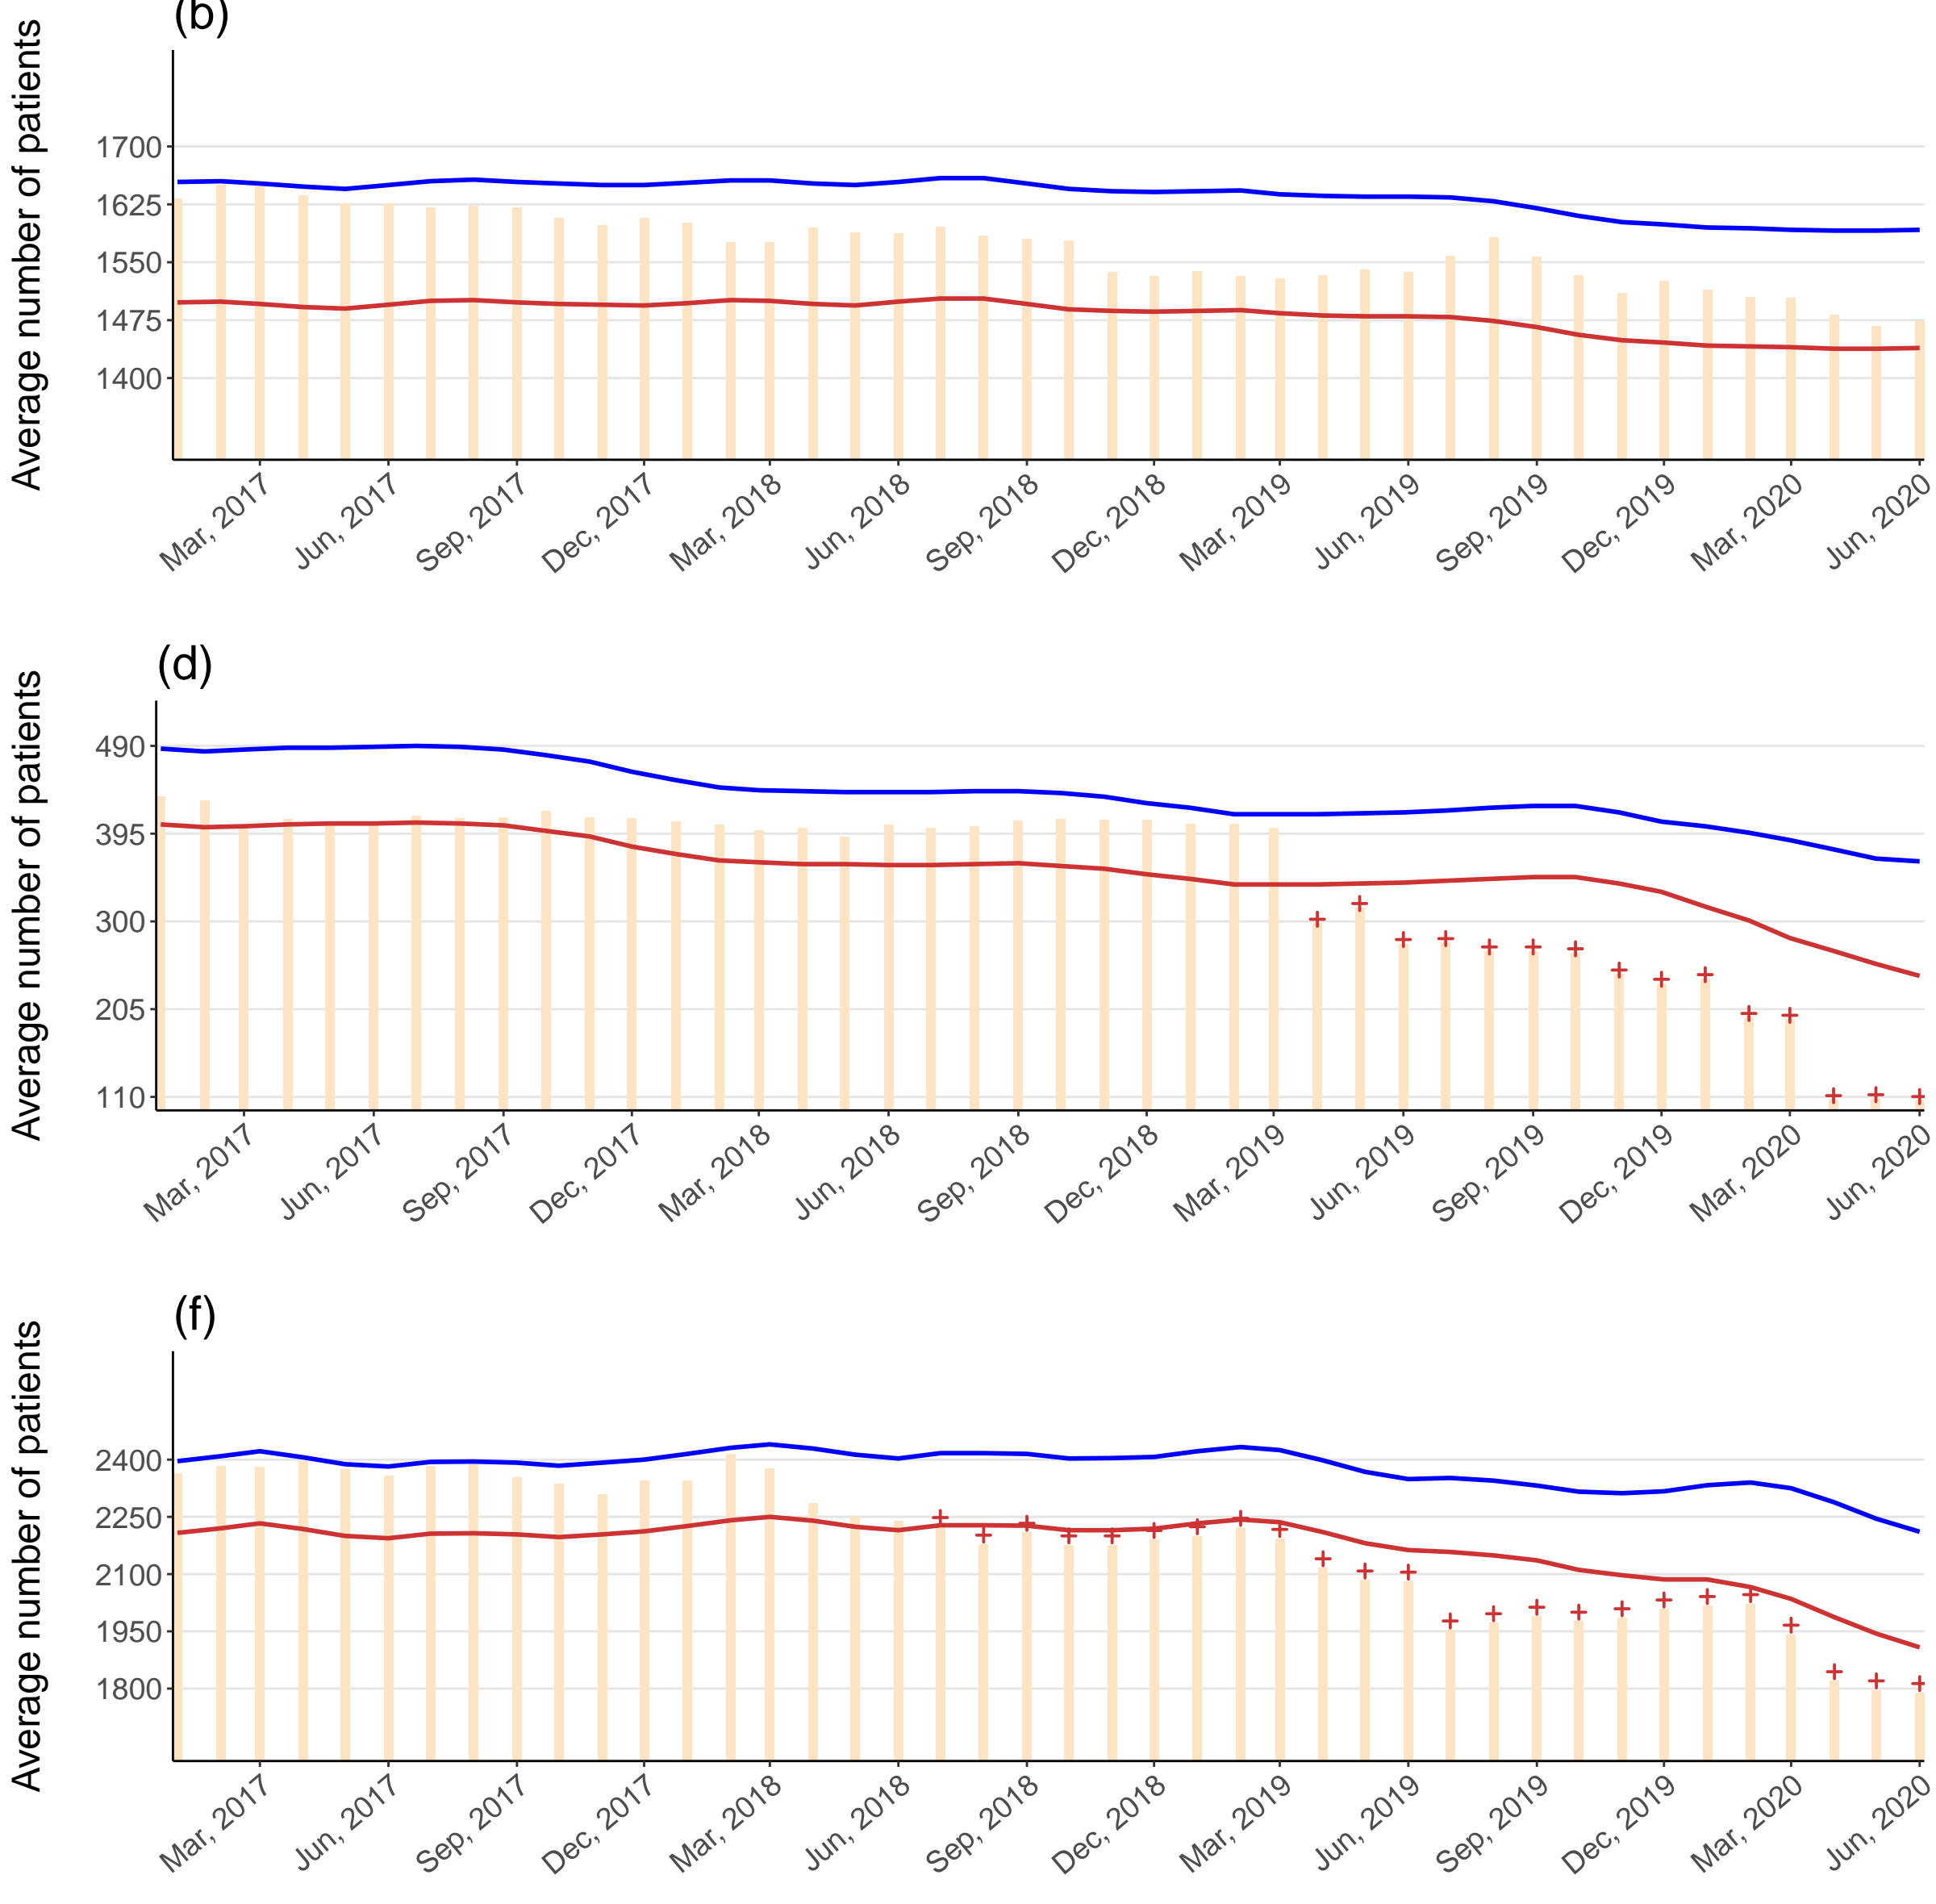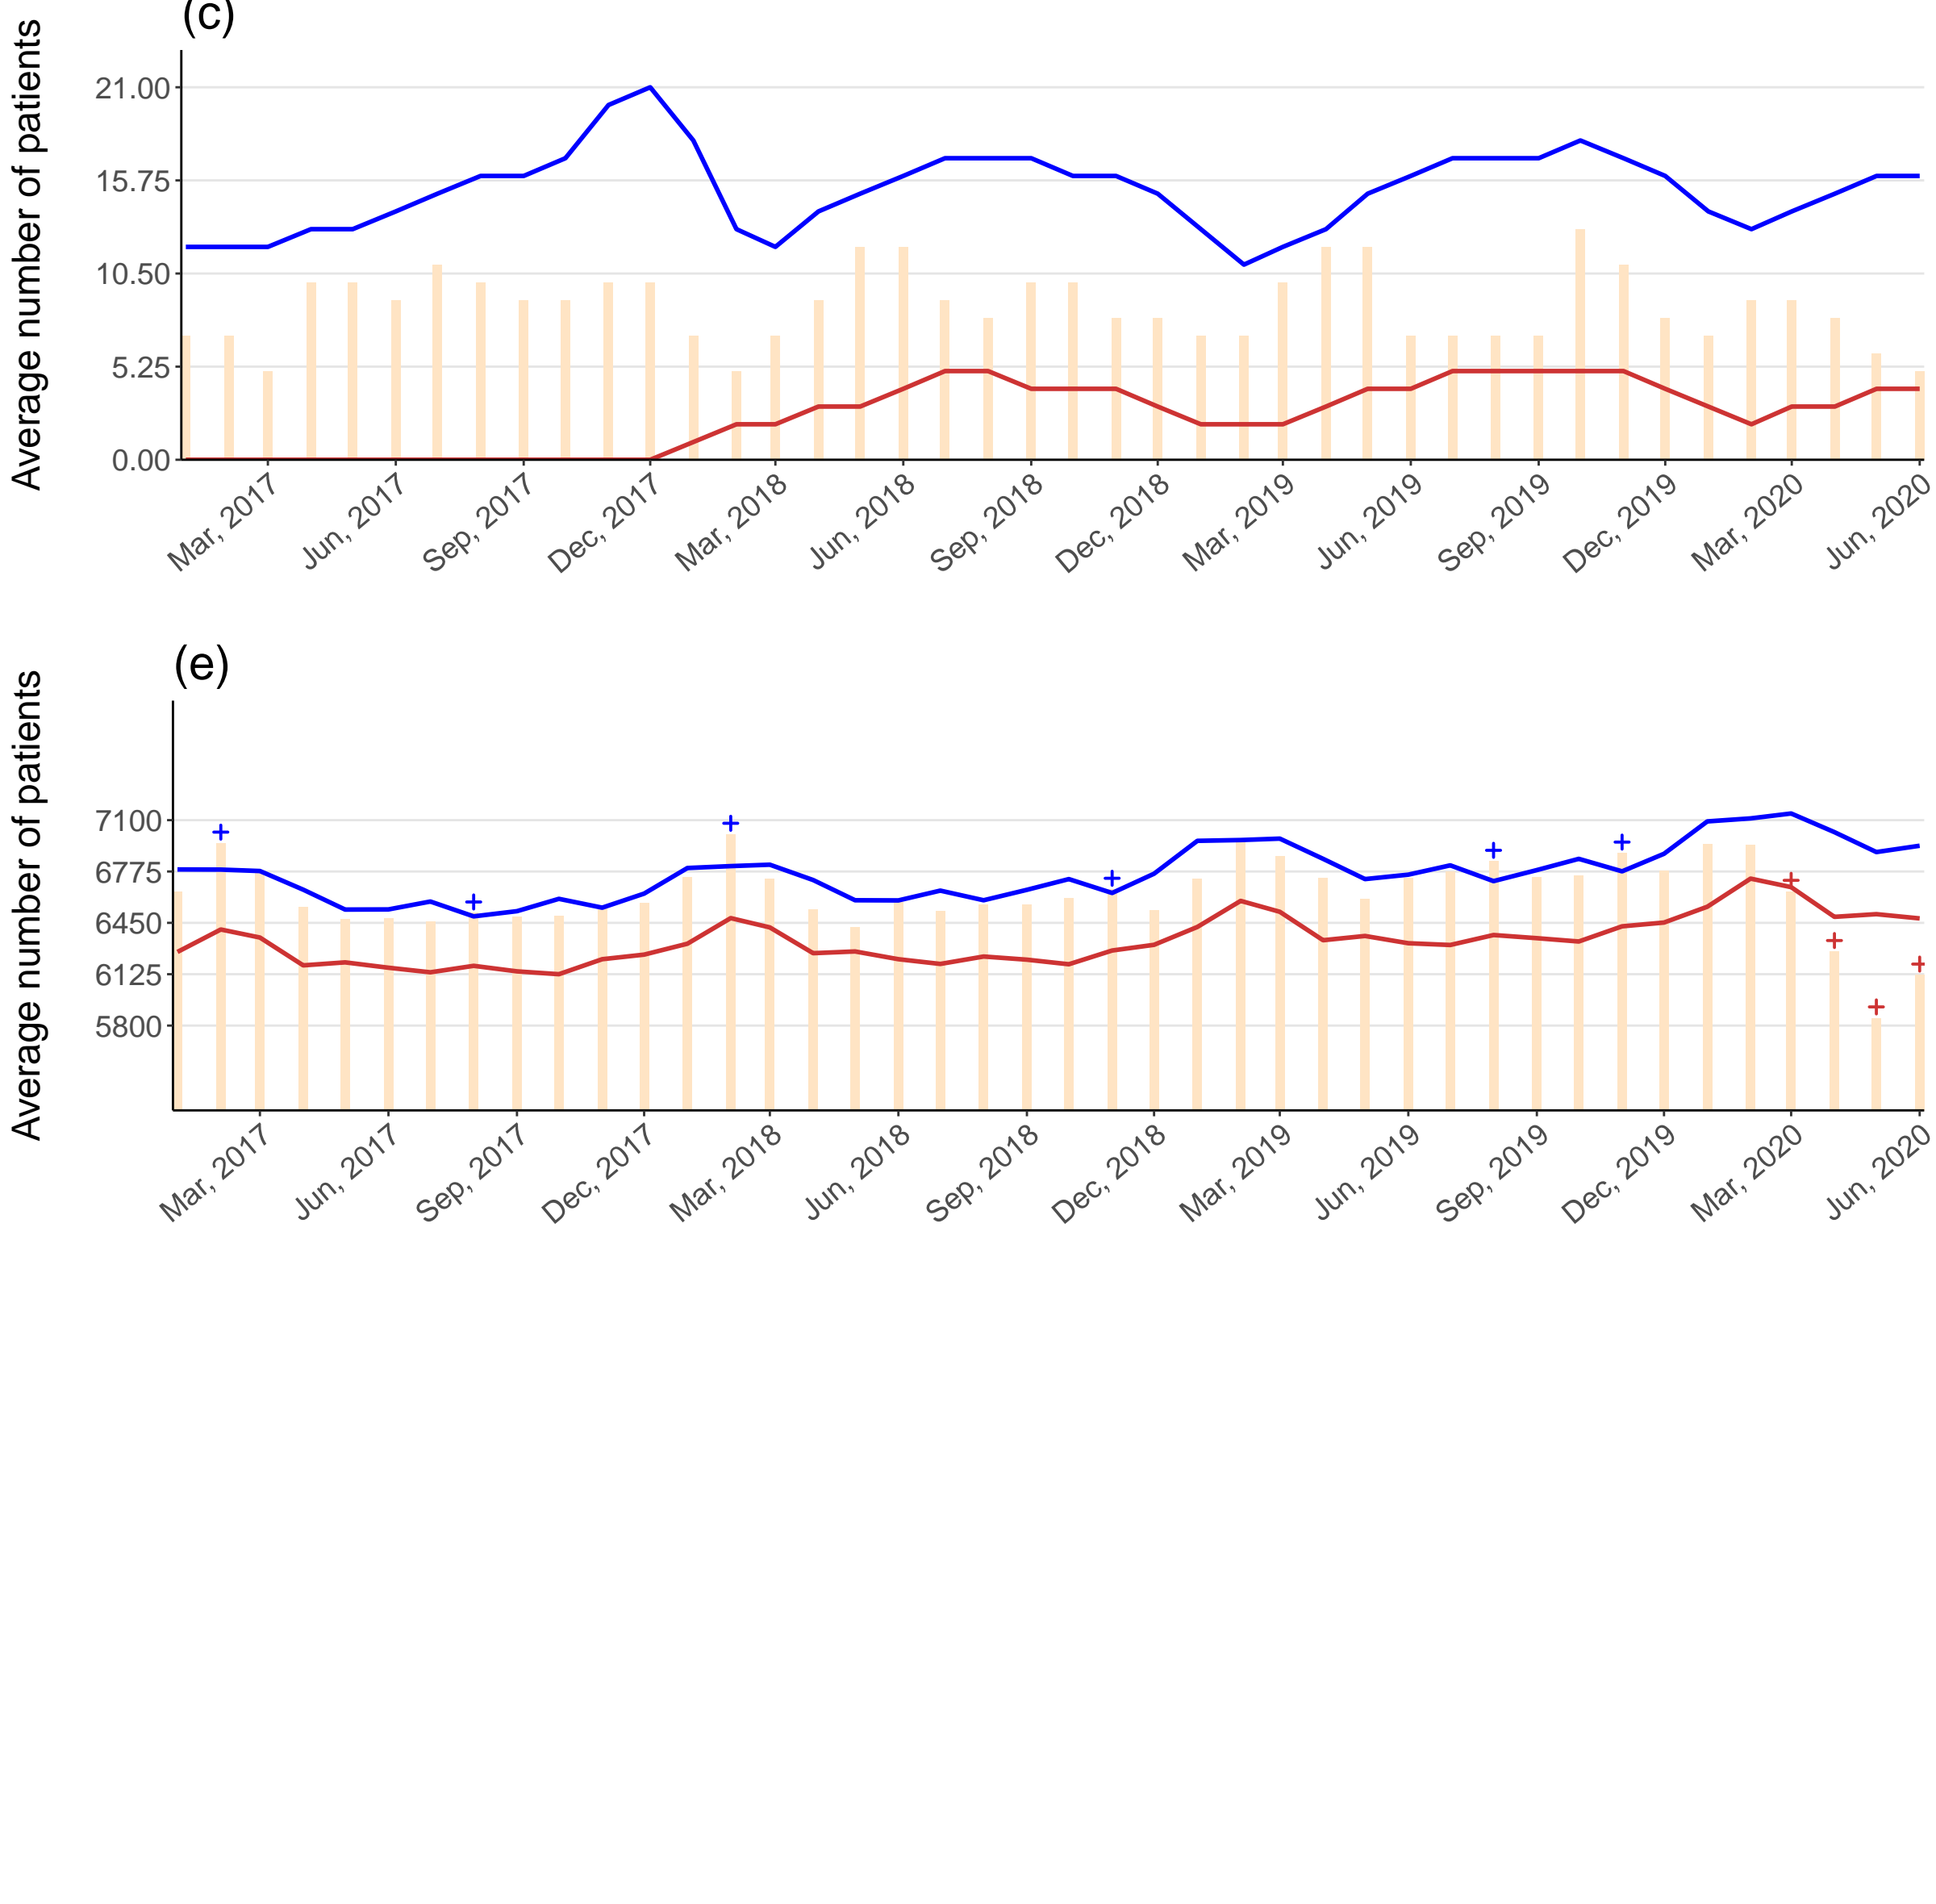



Tottori

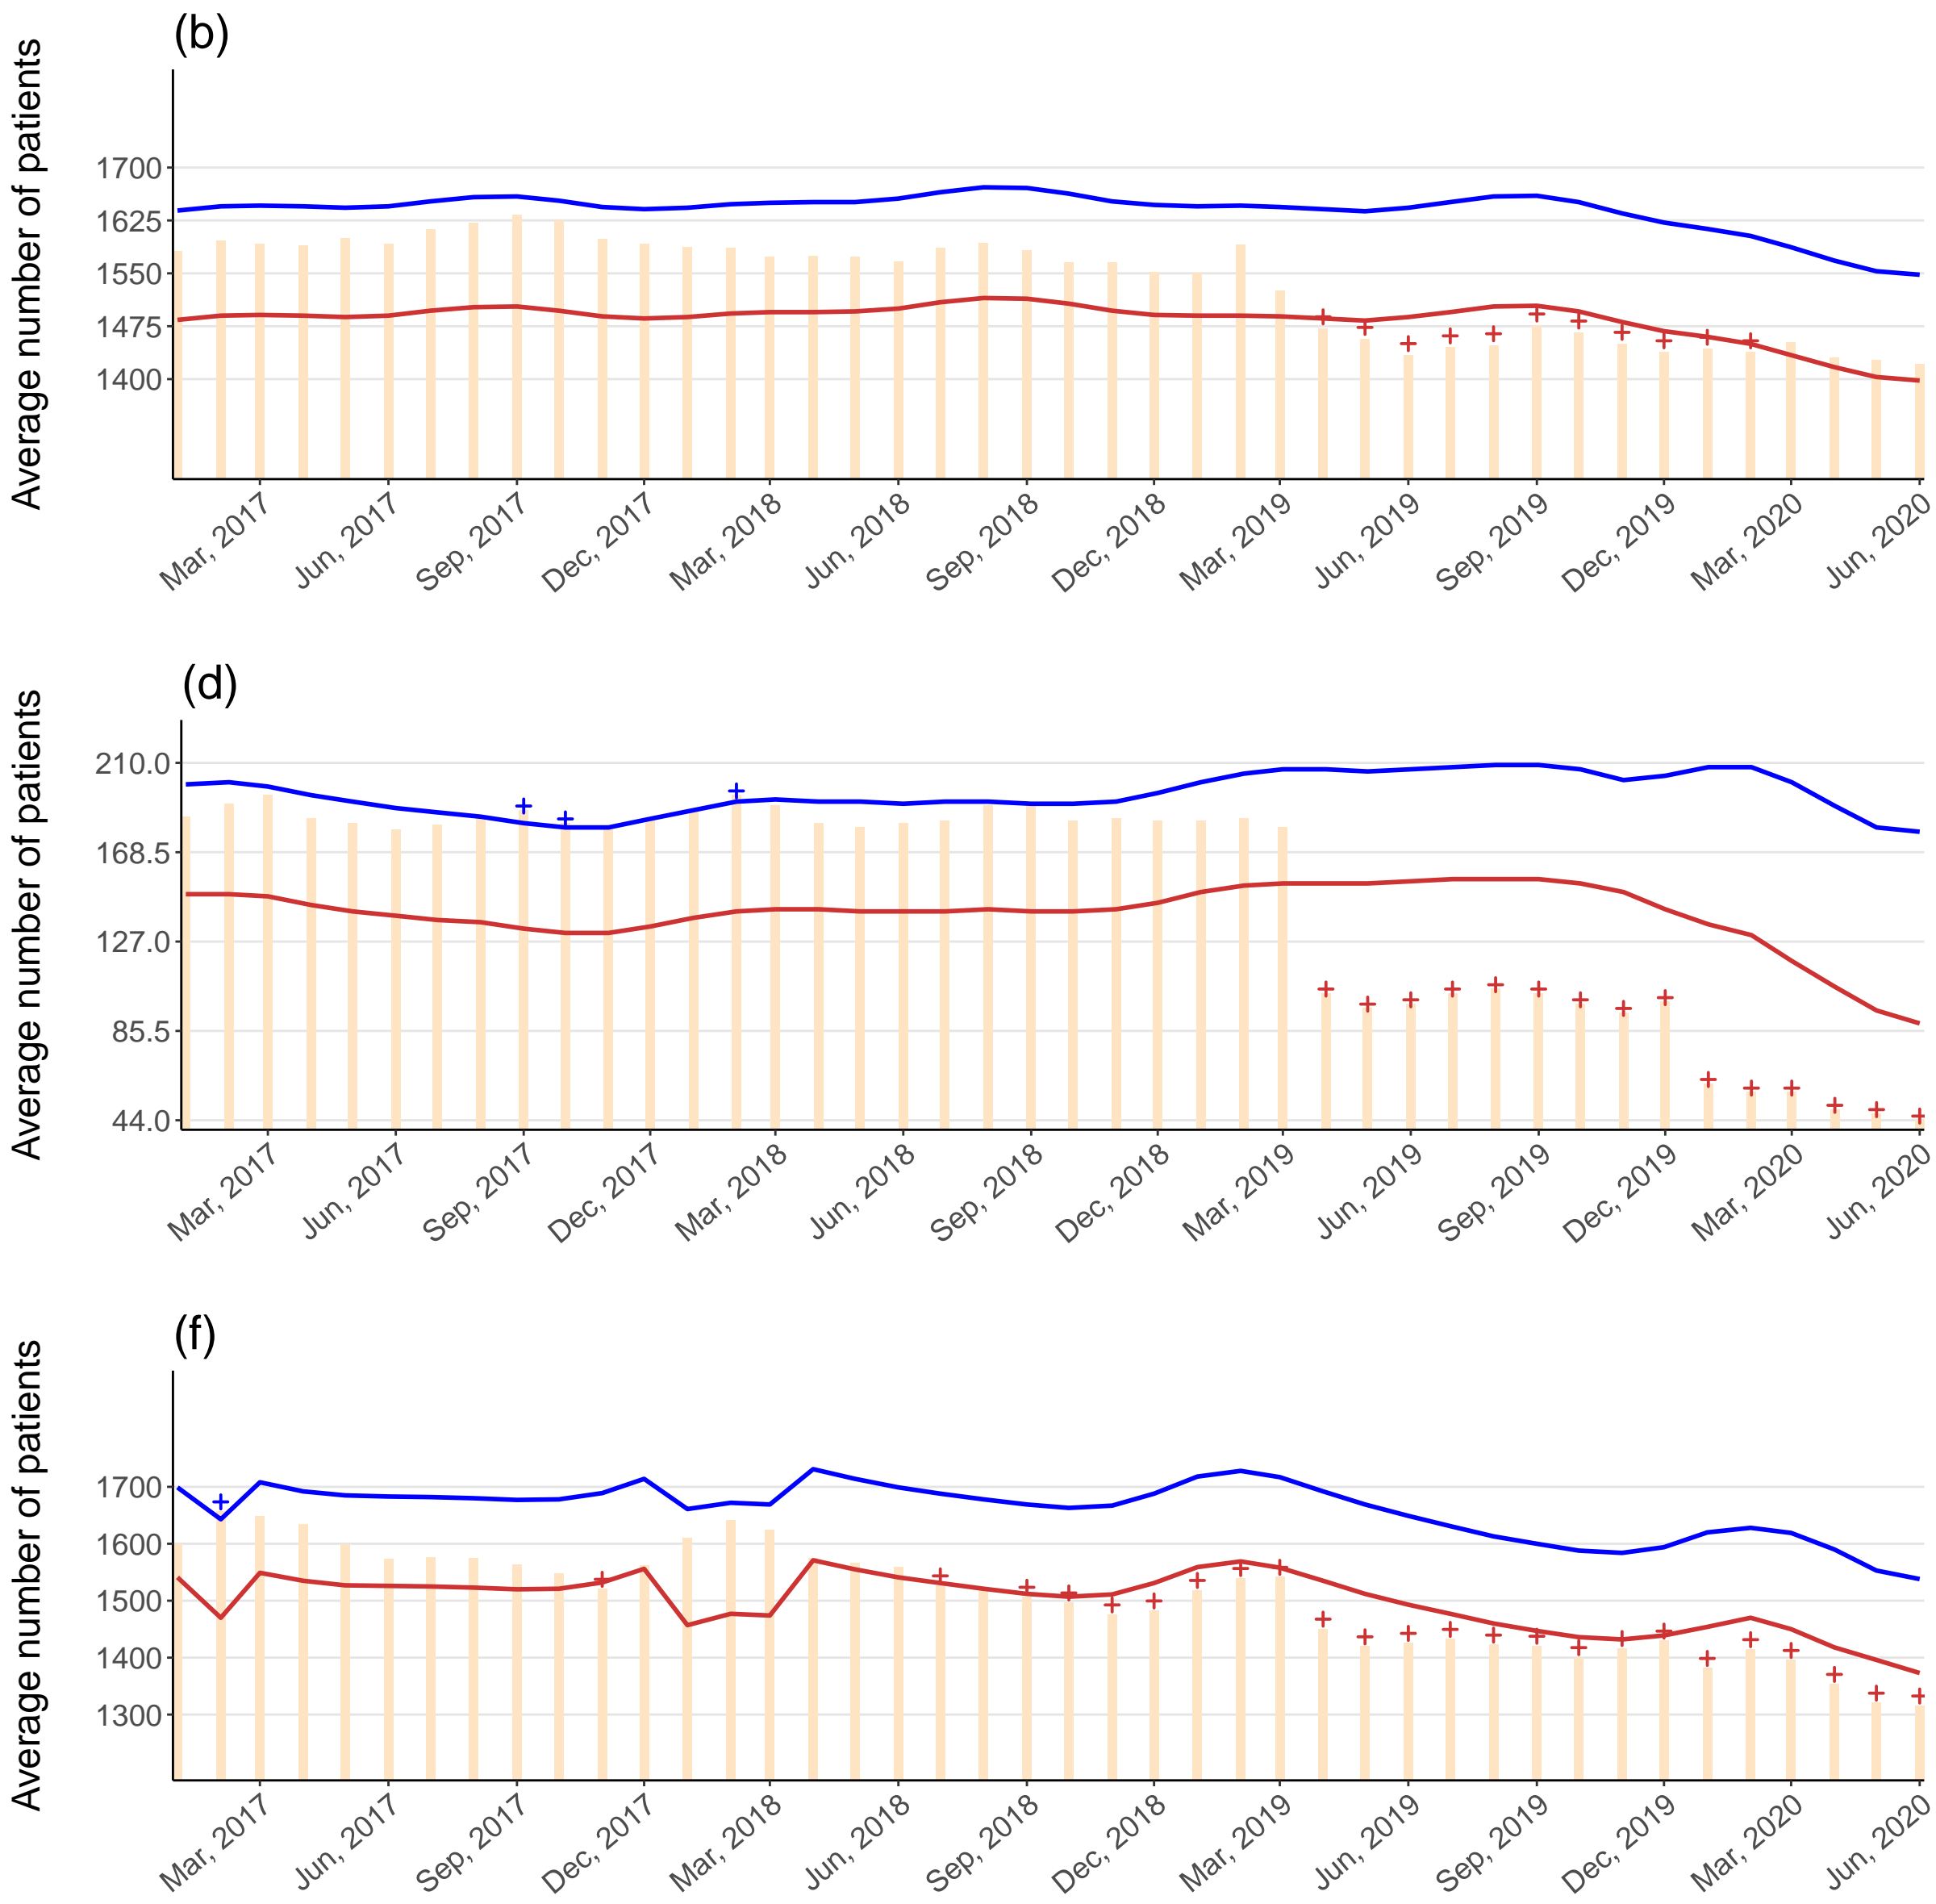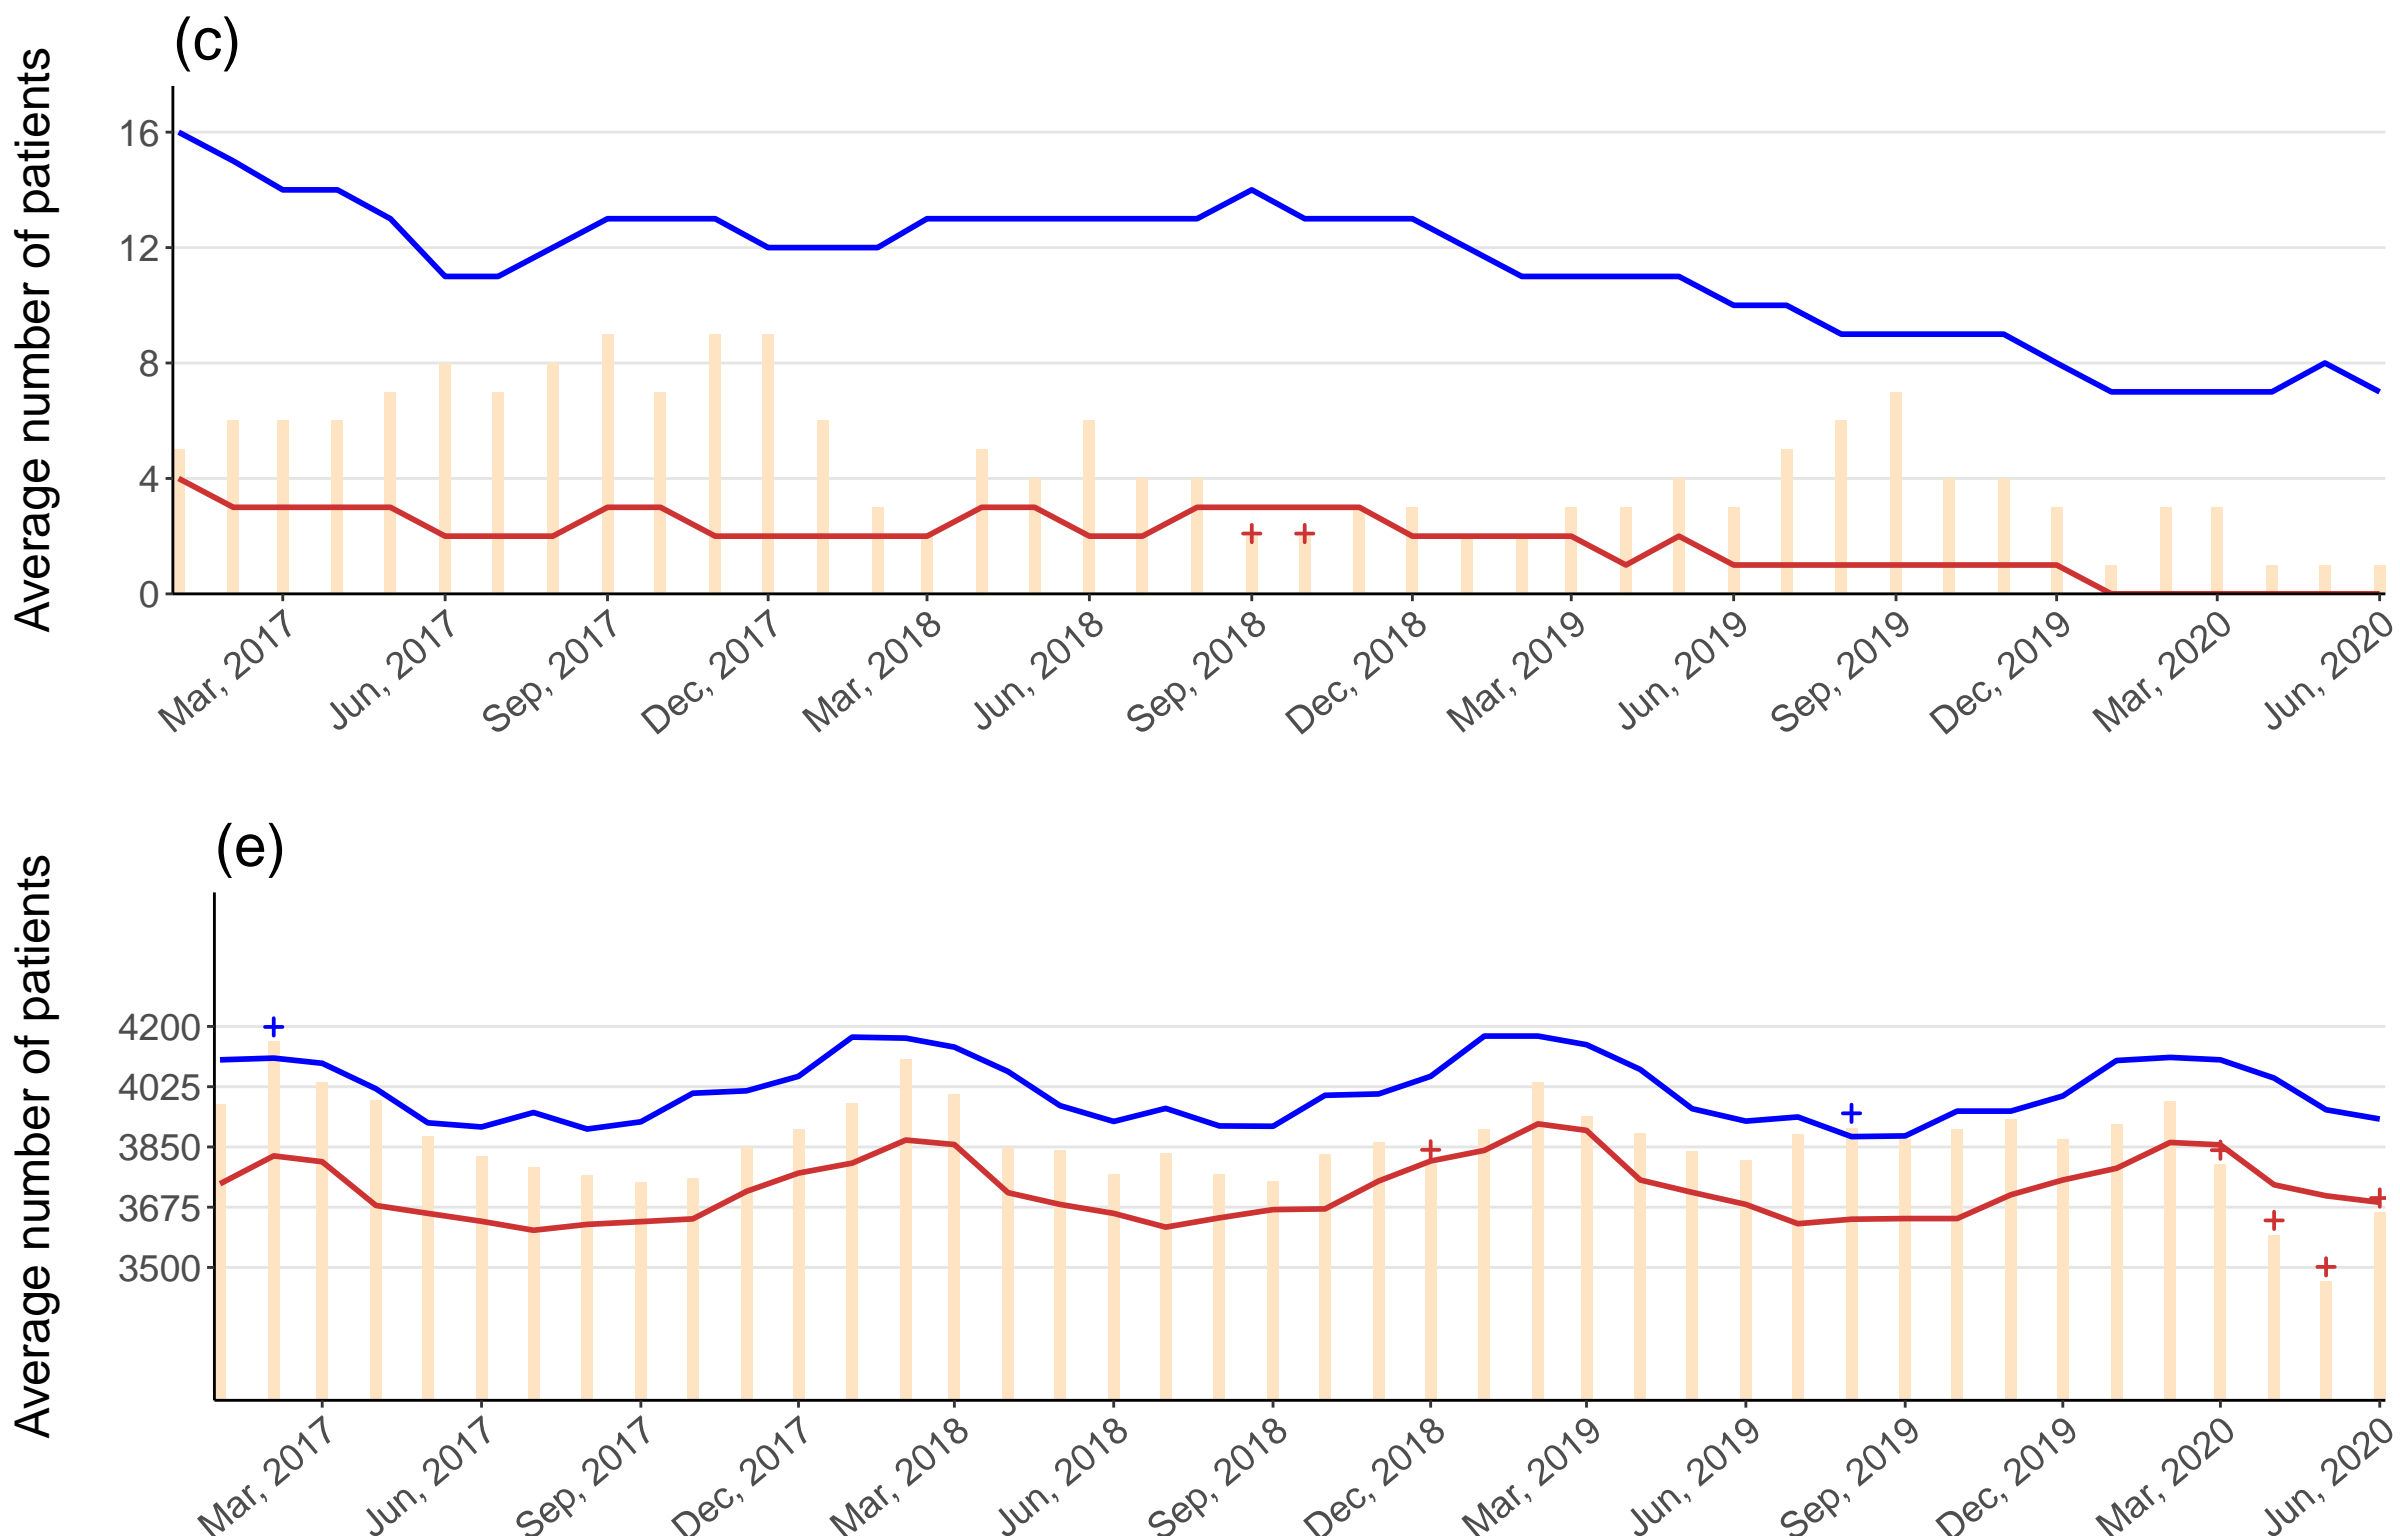

Shimane

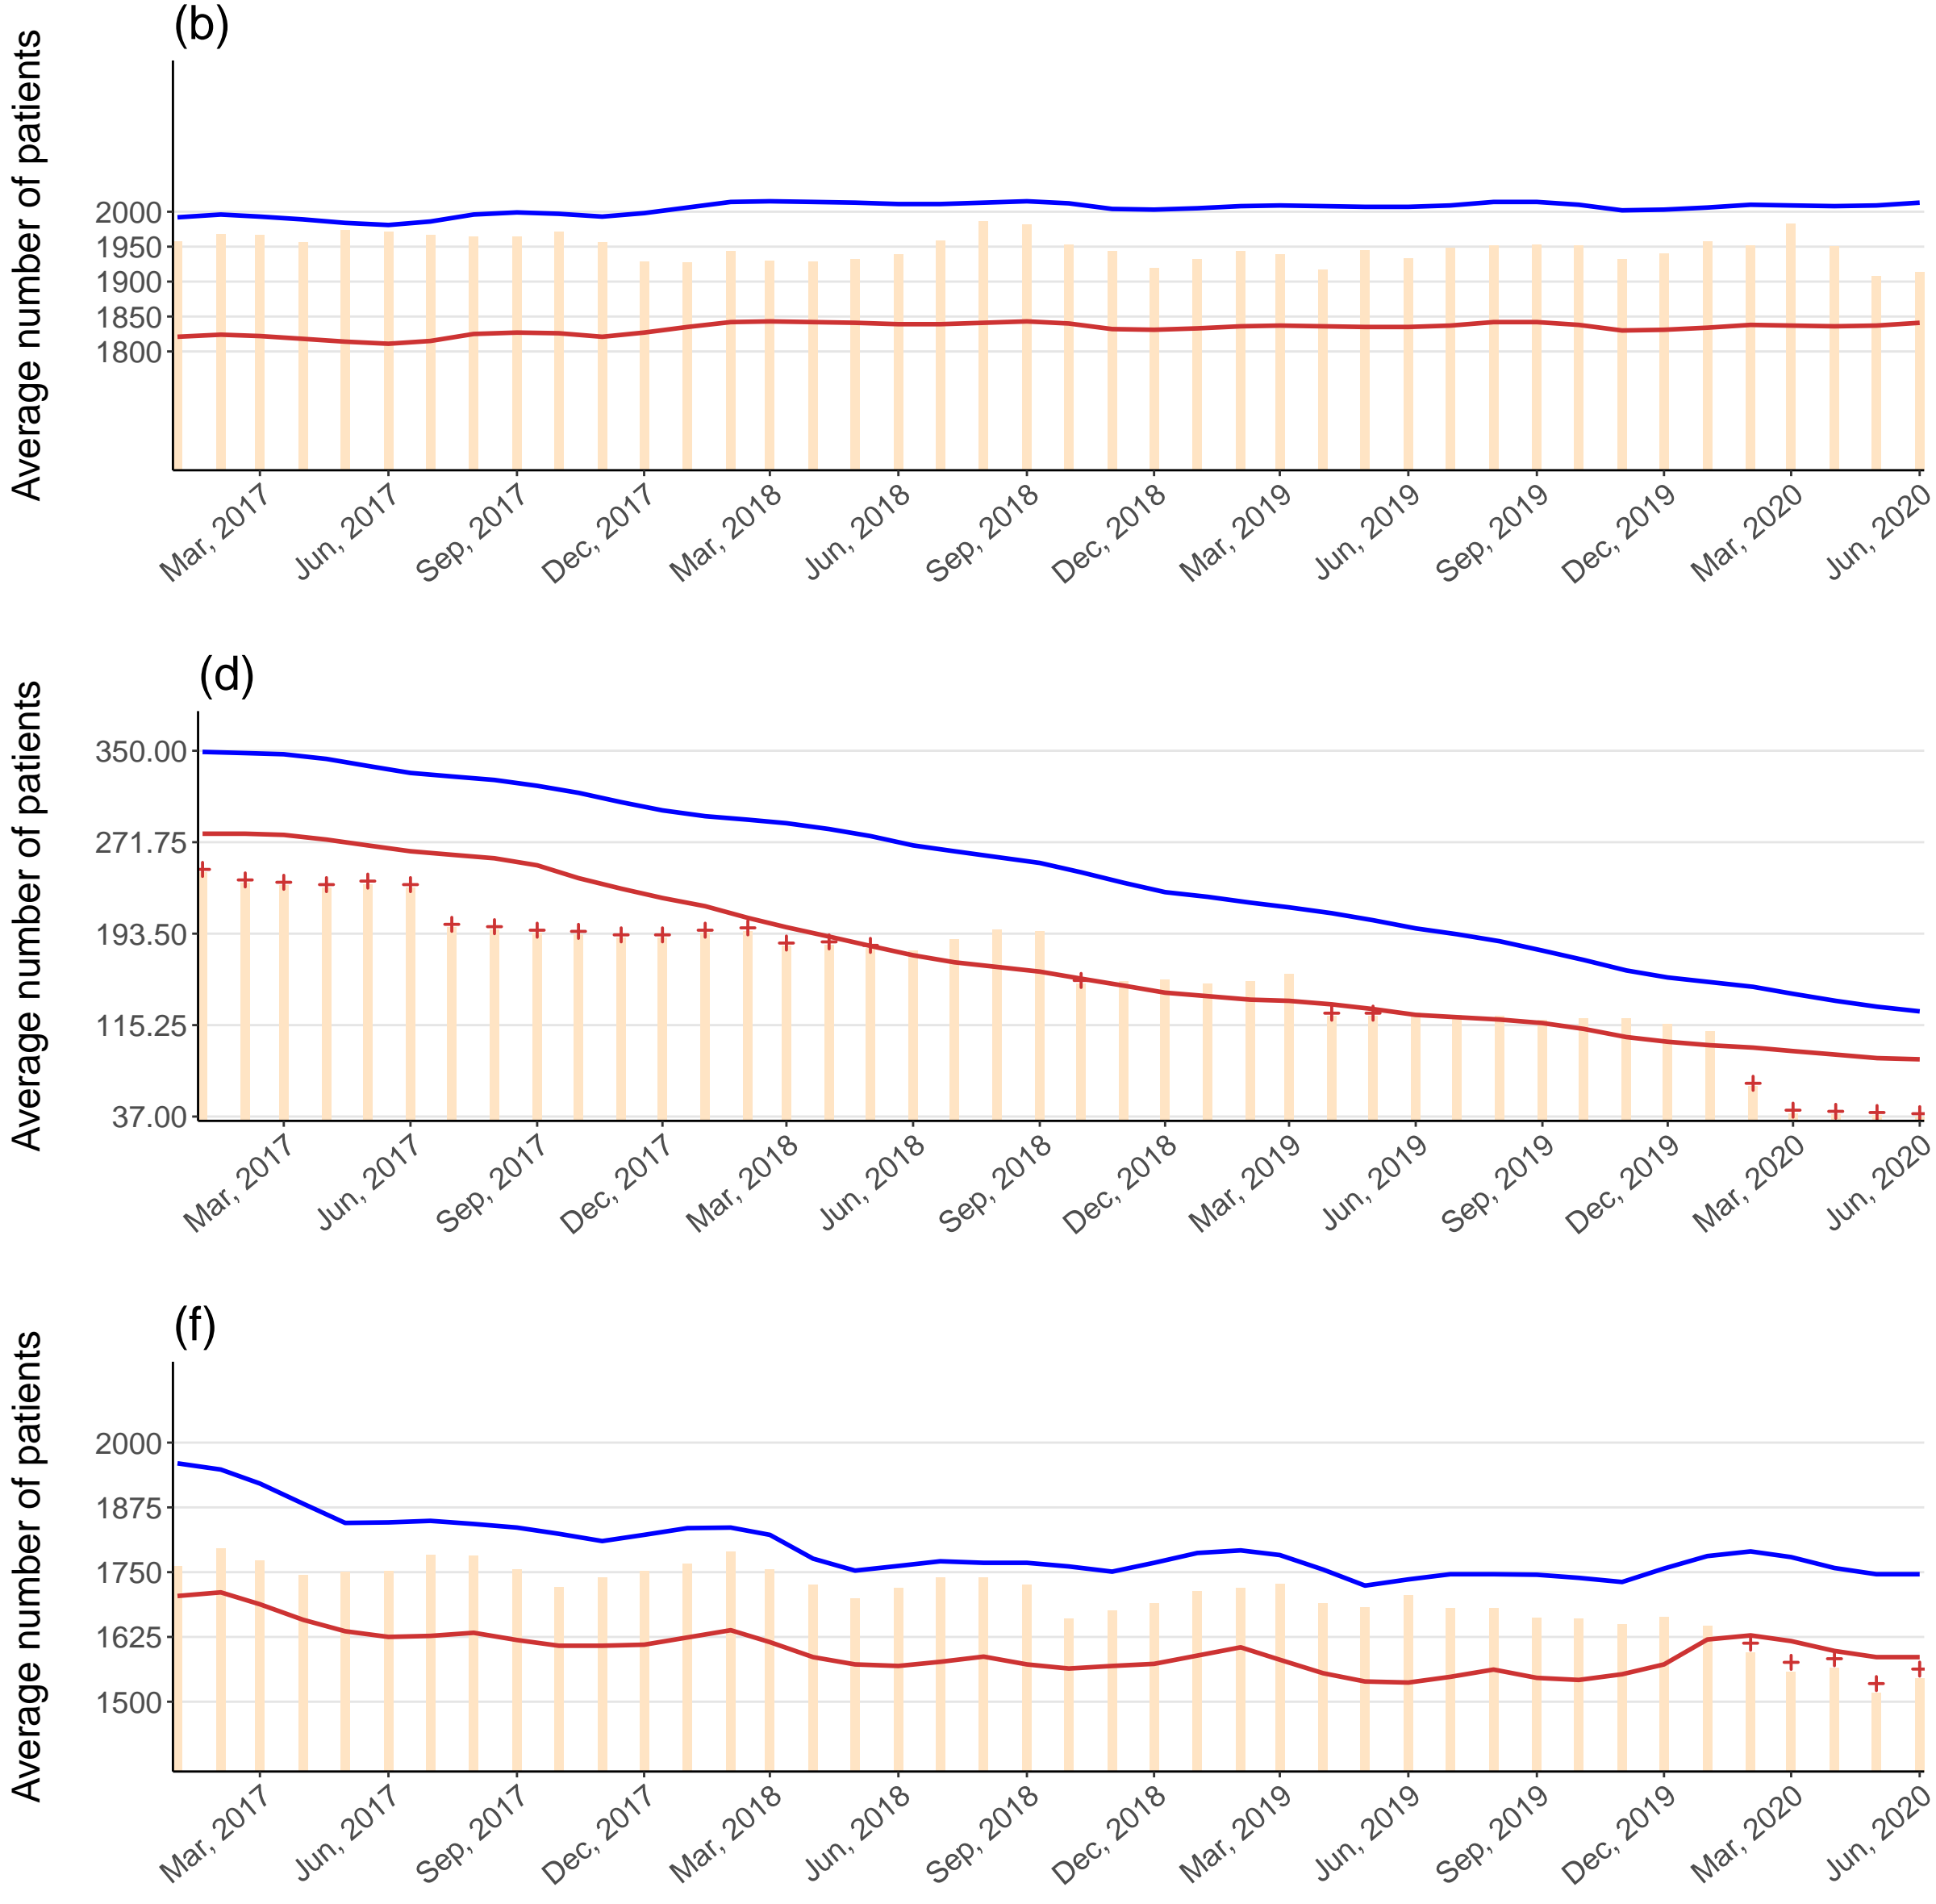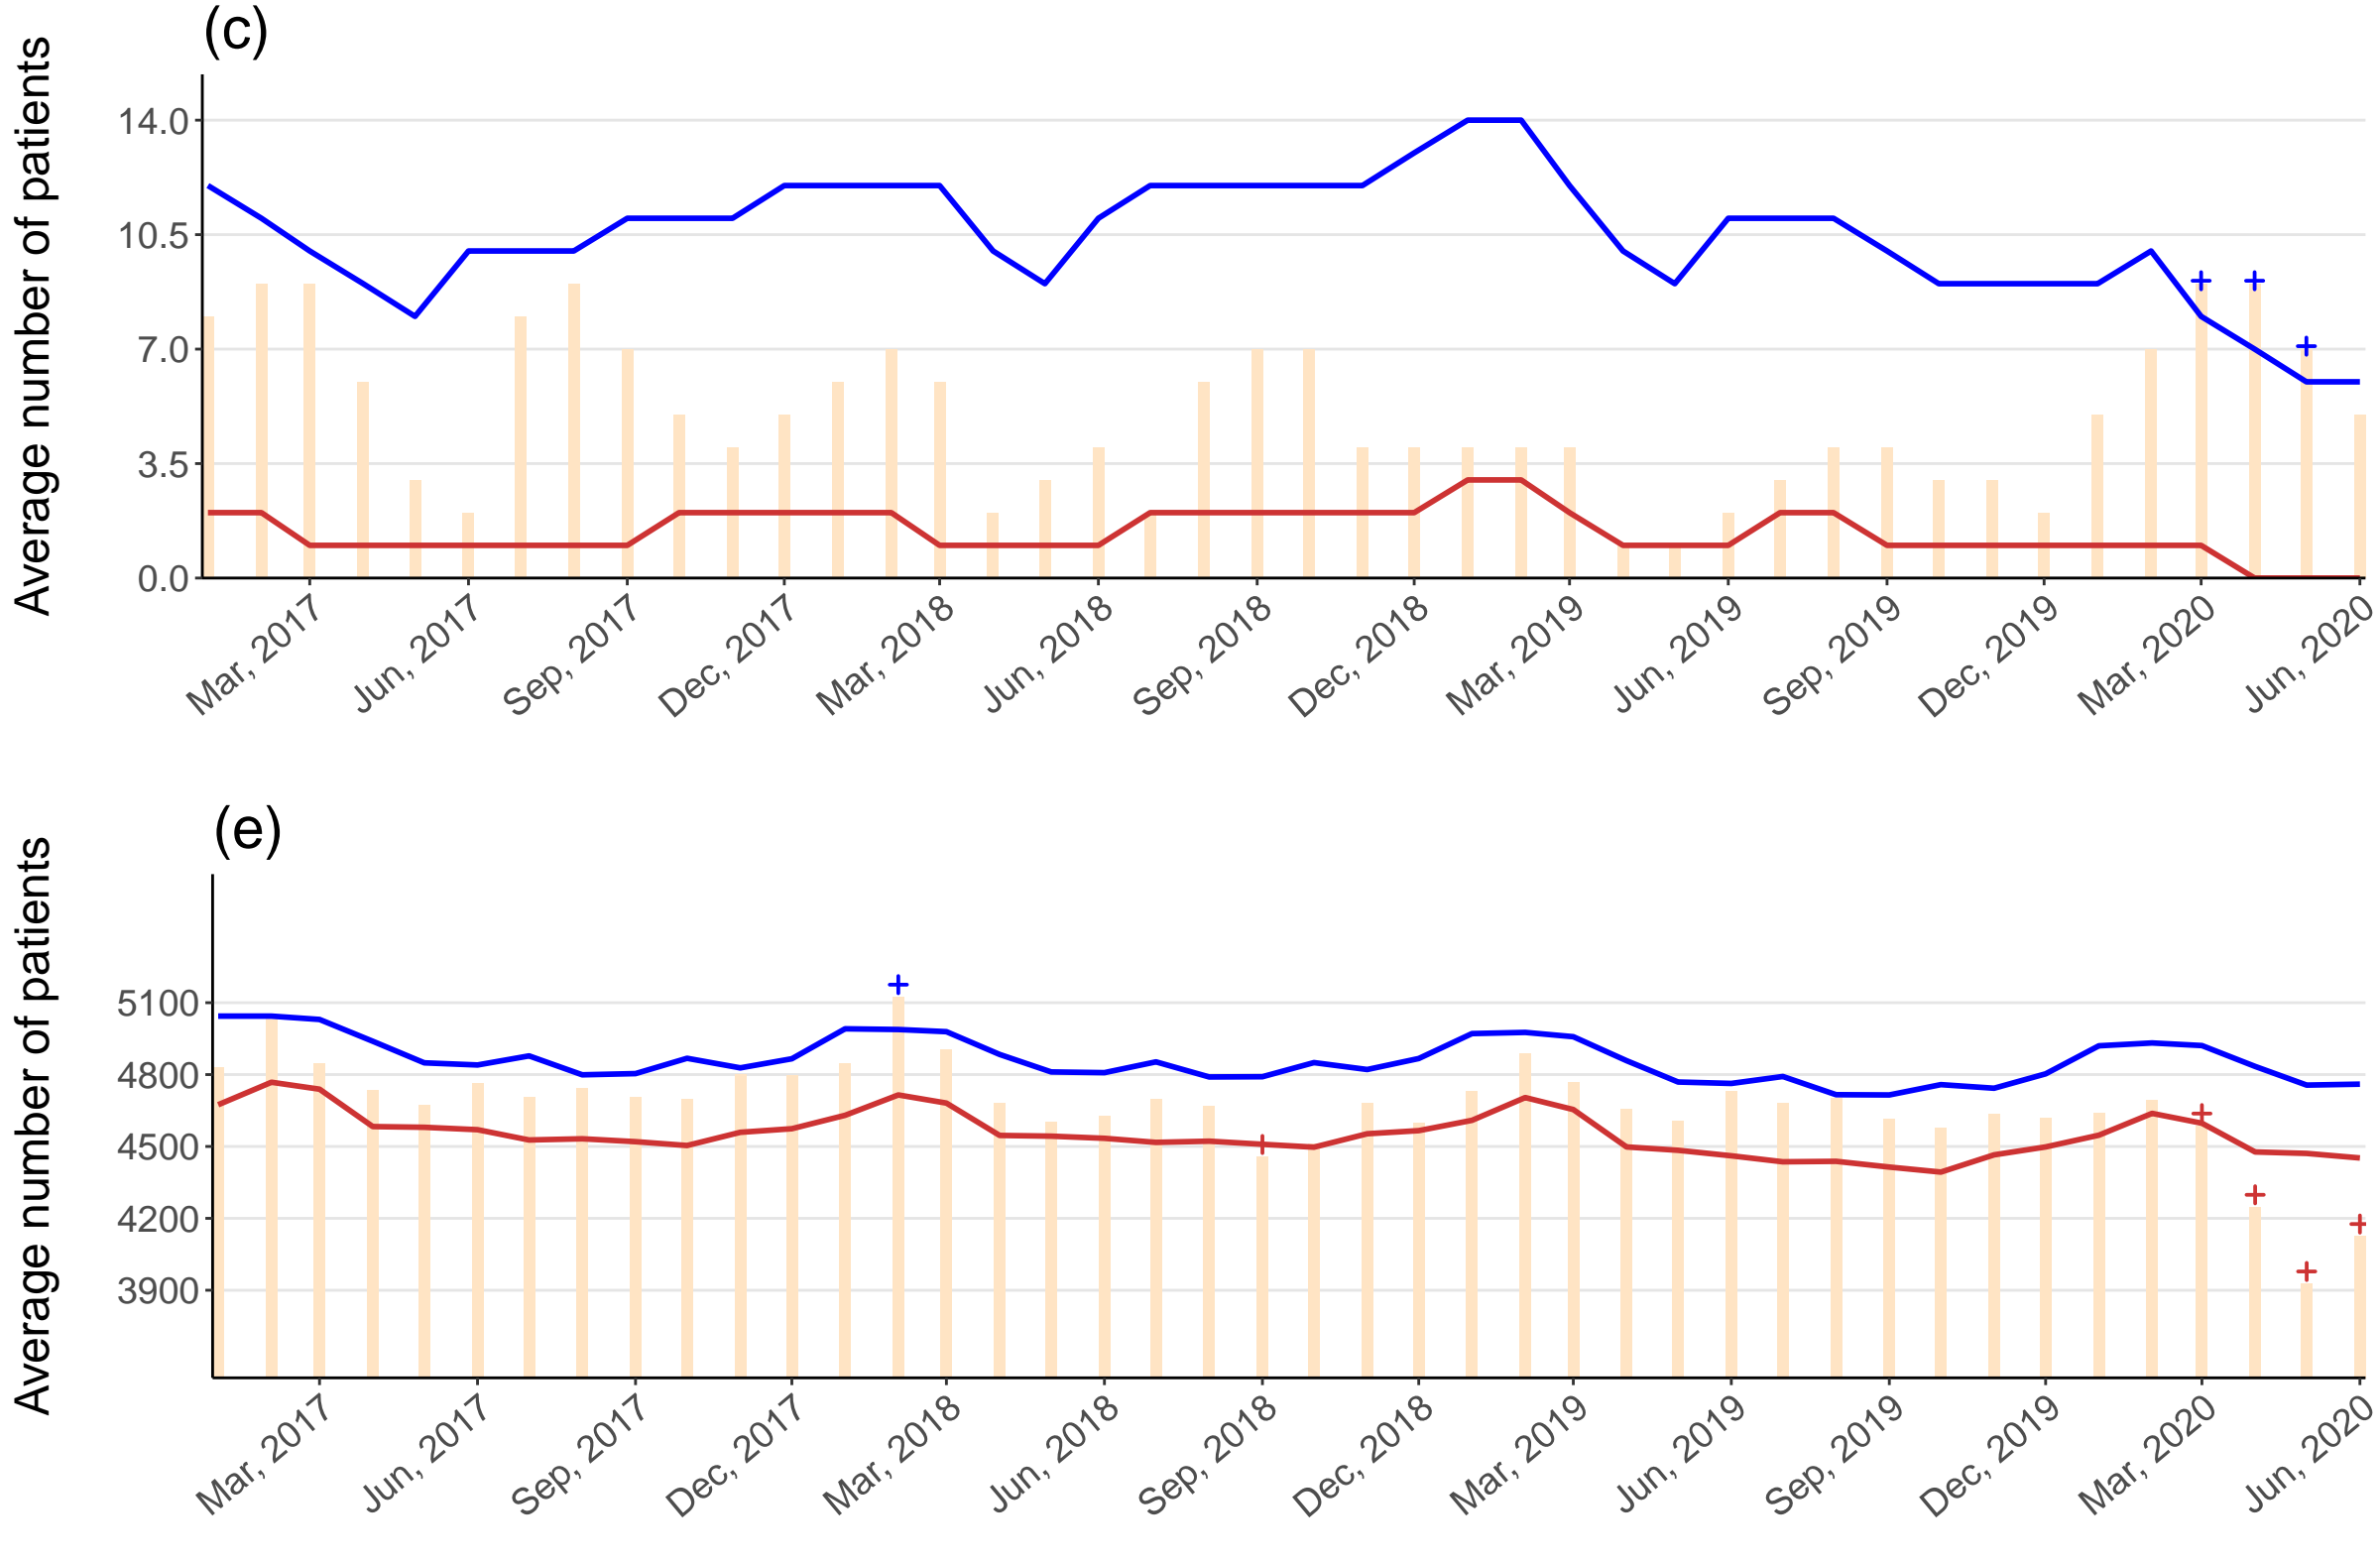

Okayama

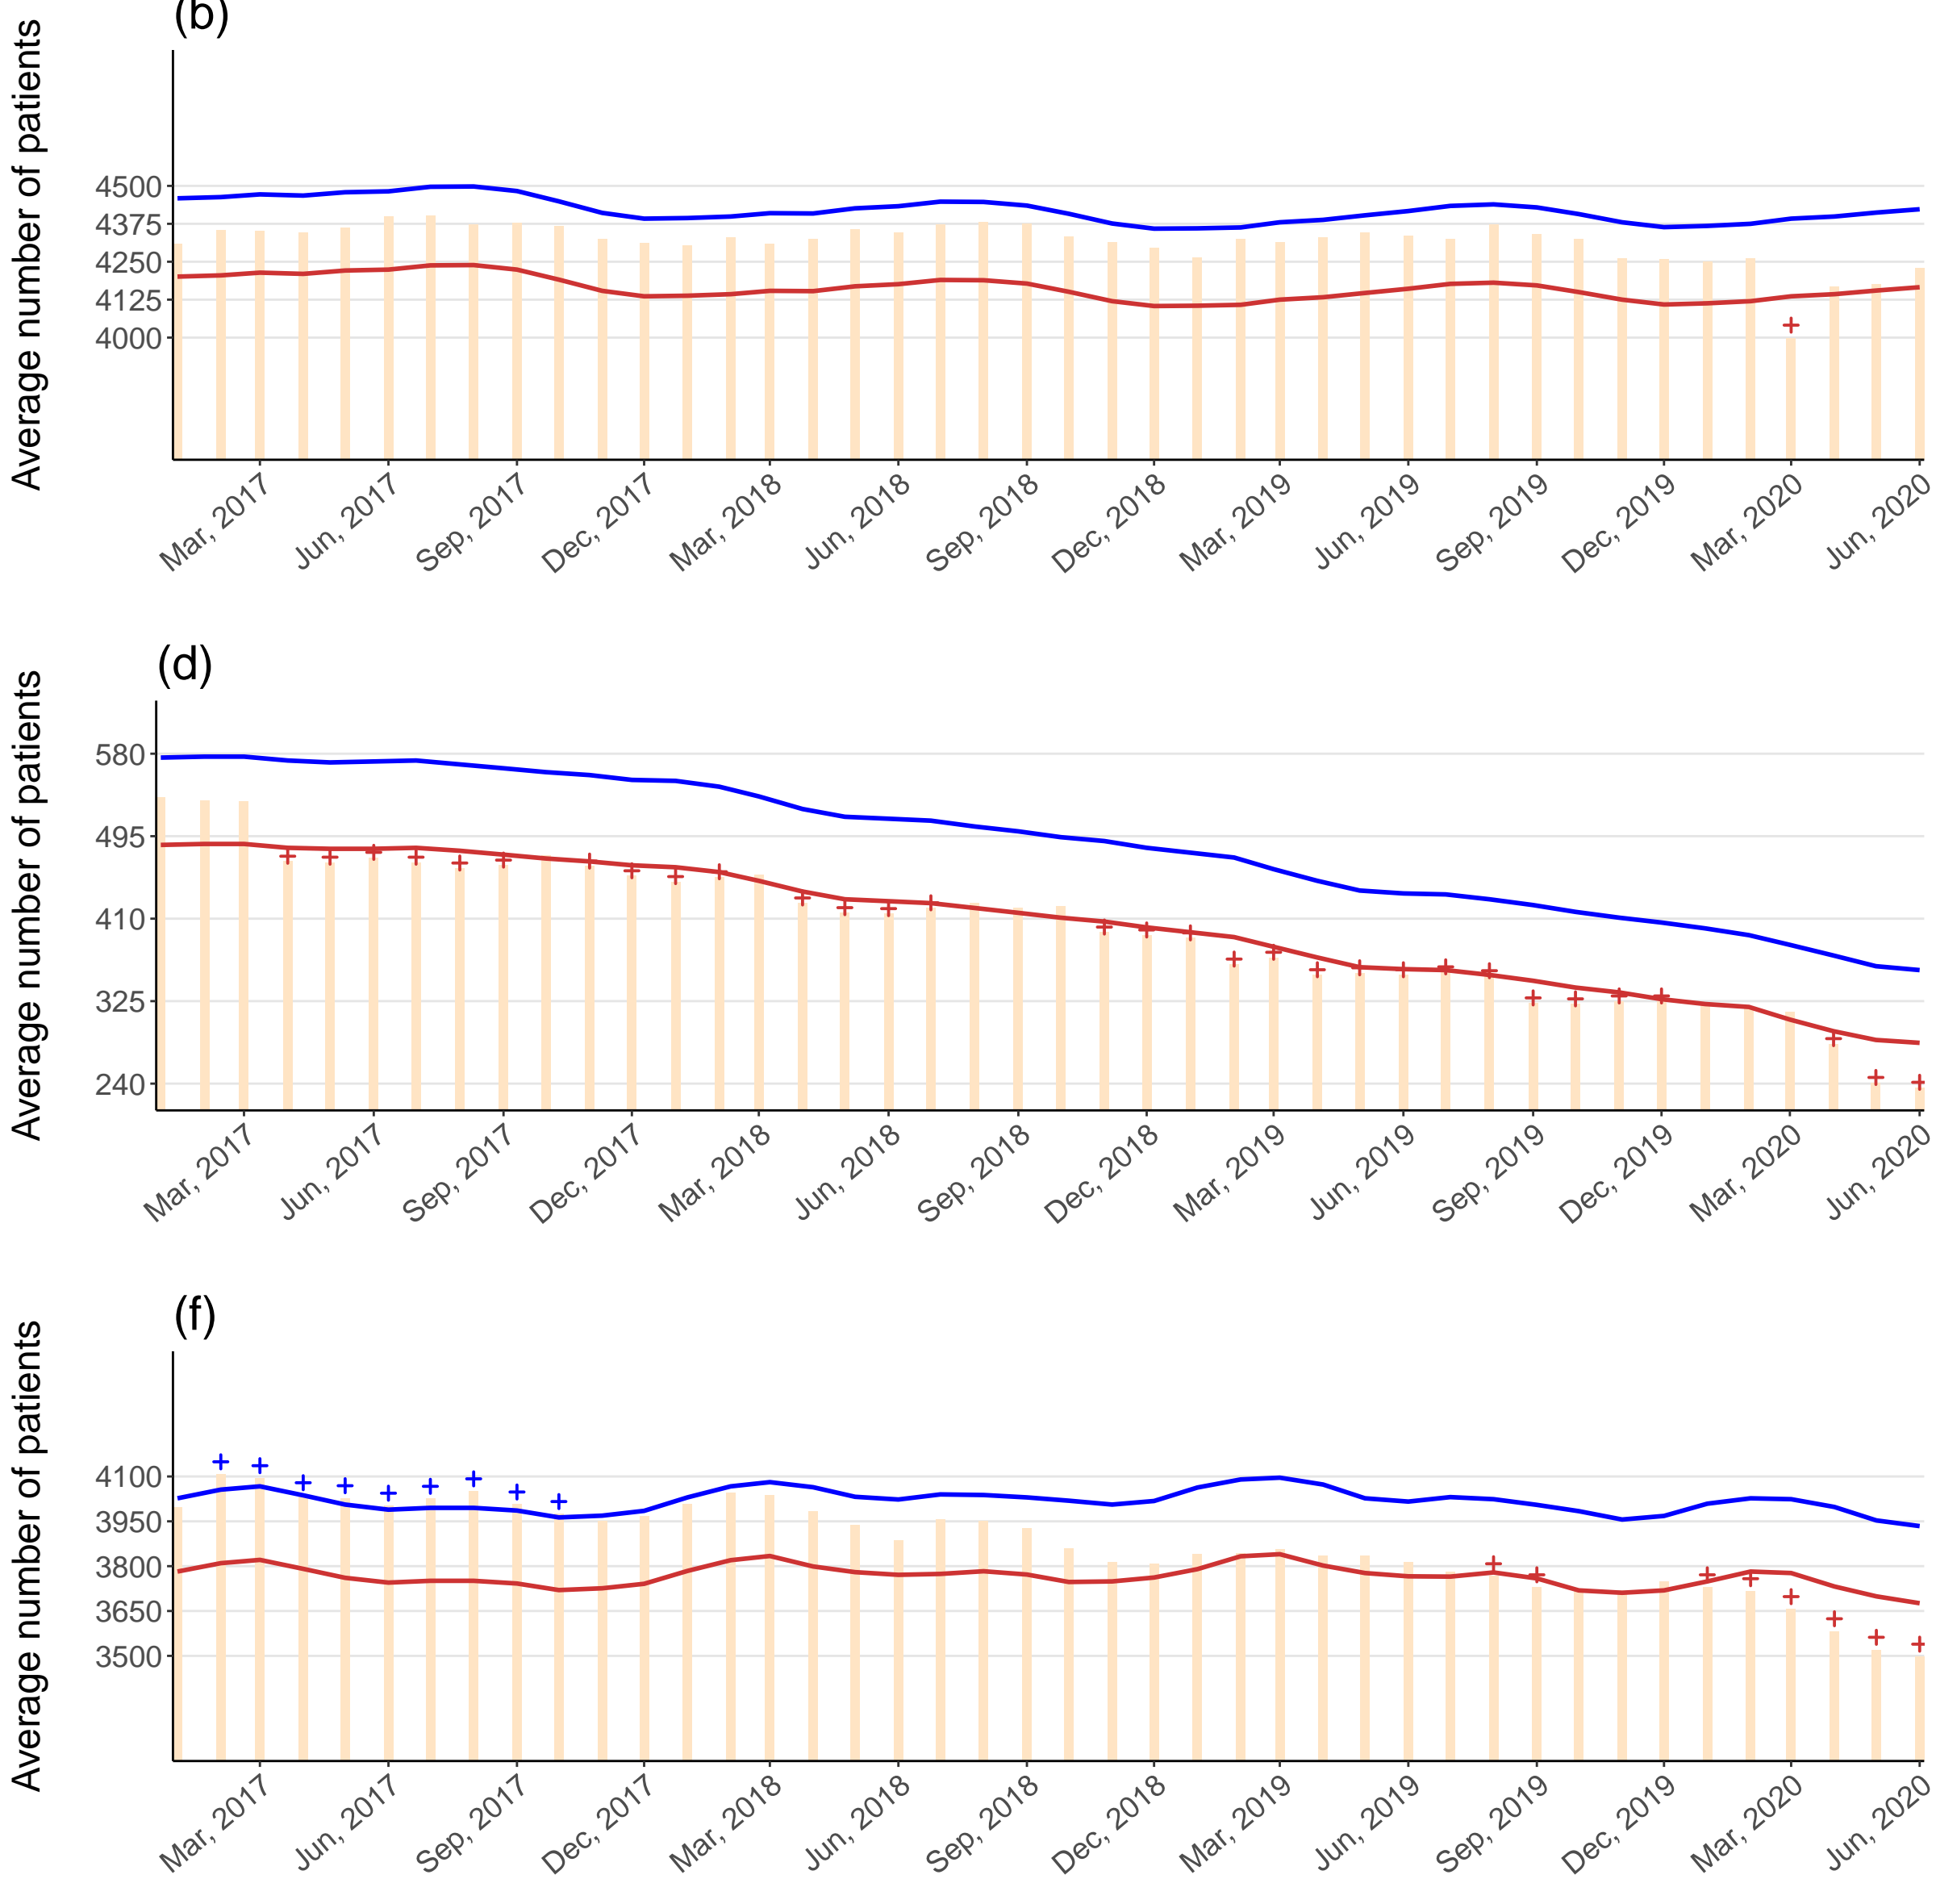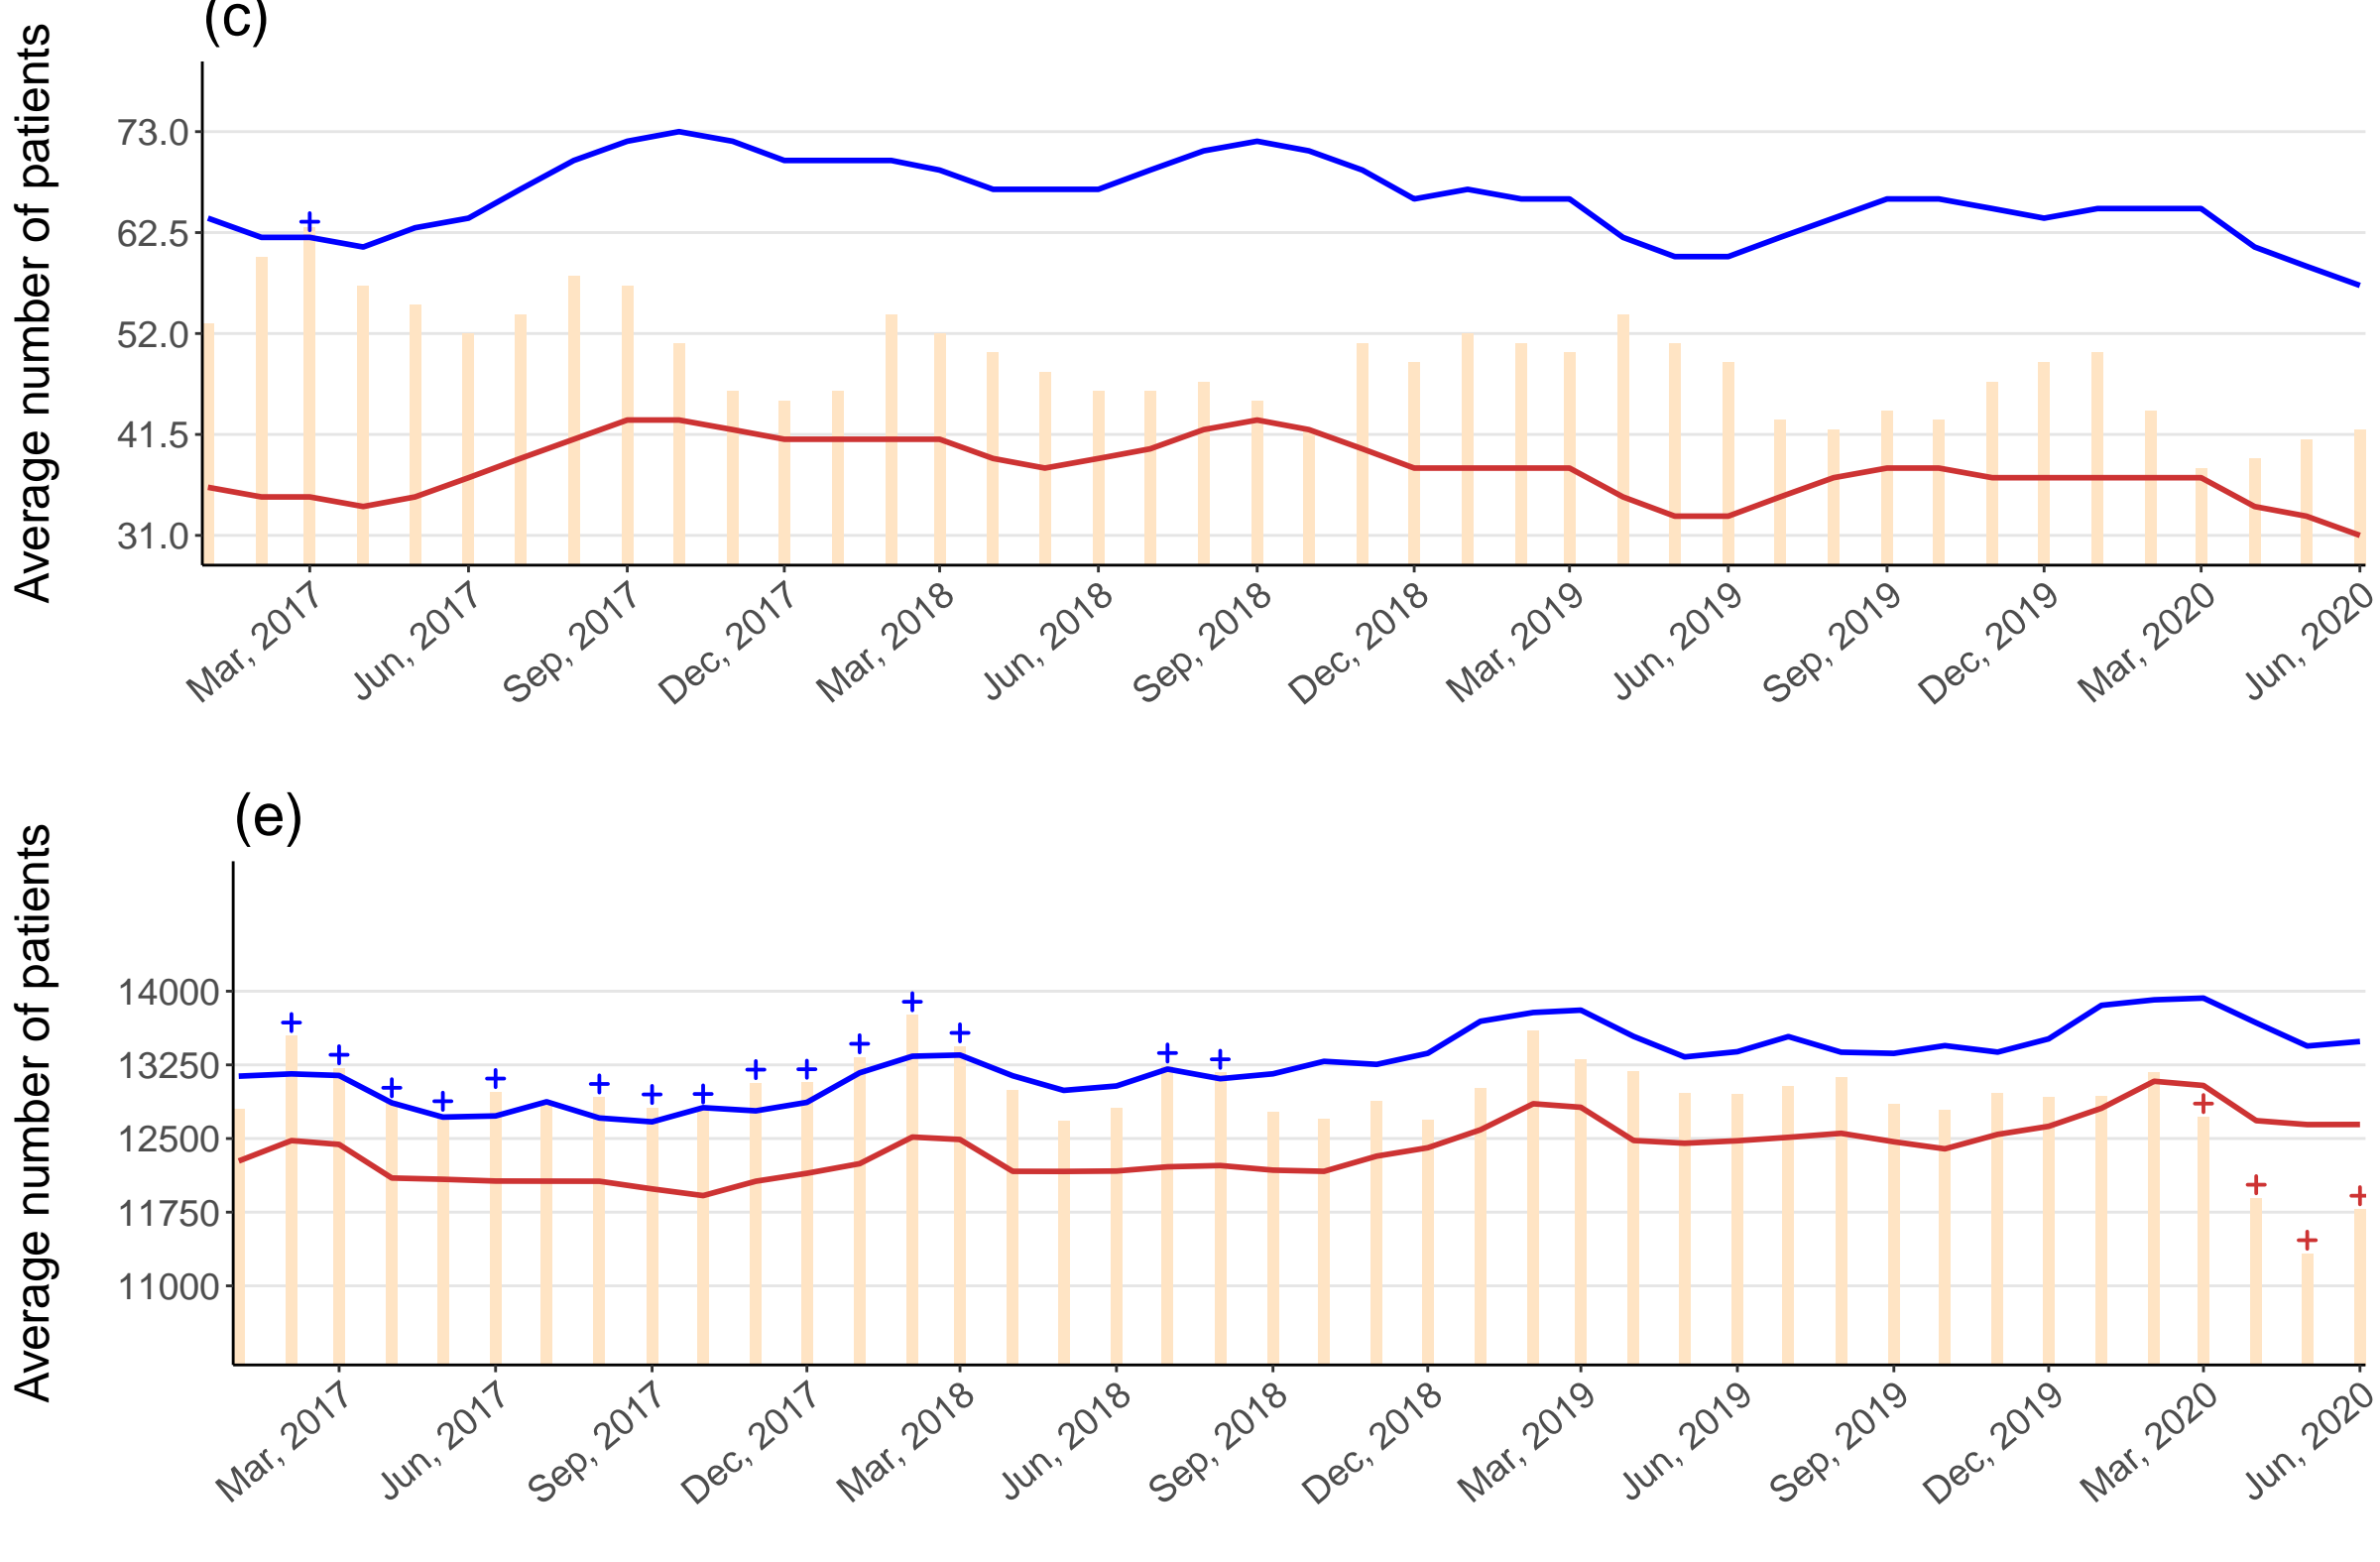

Hiroshima

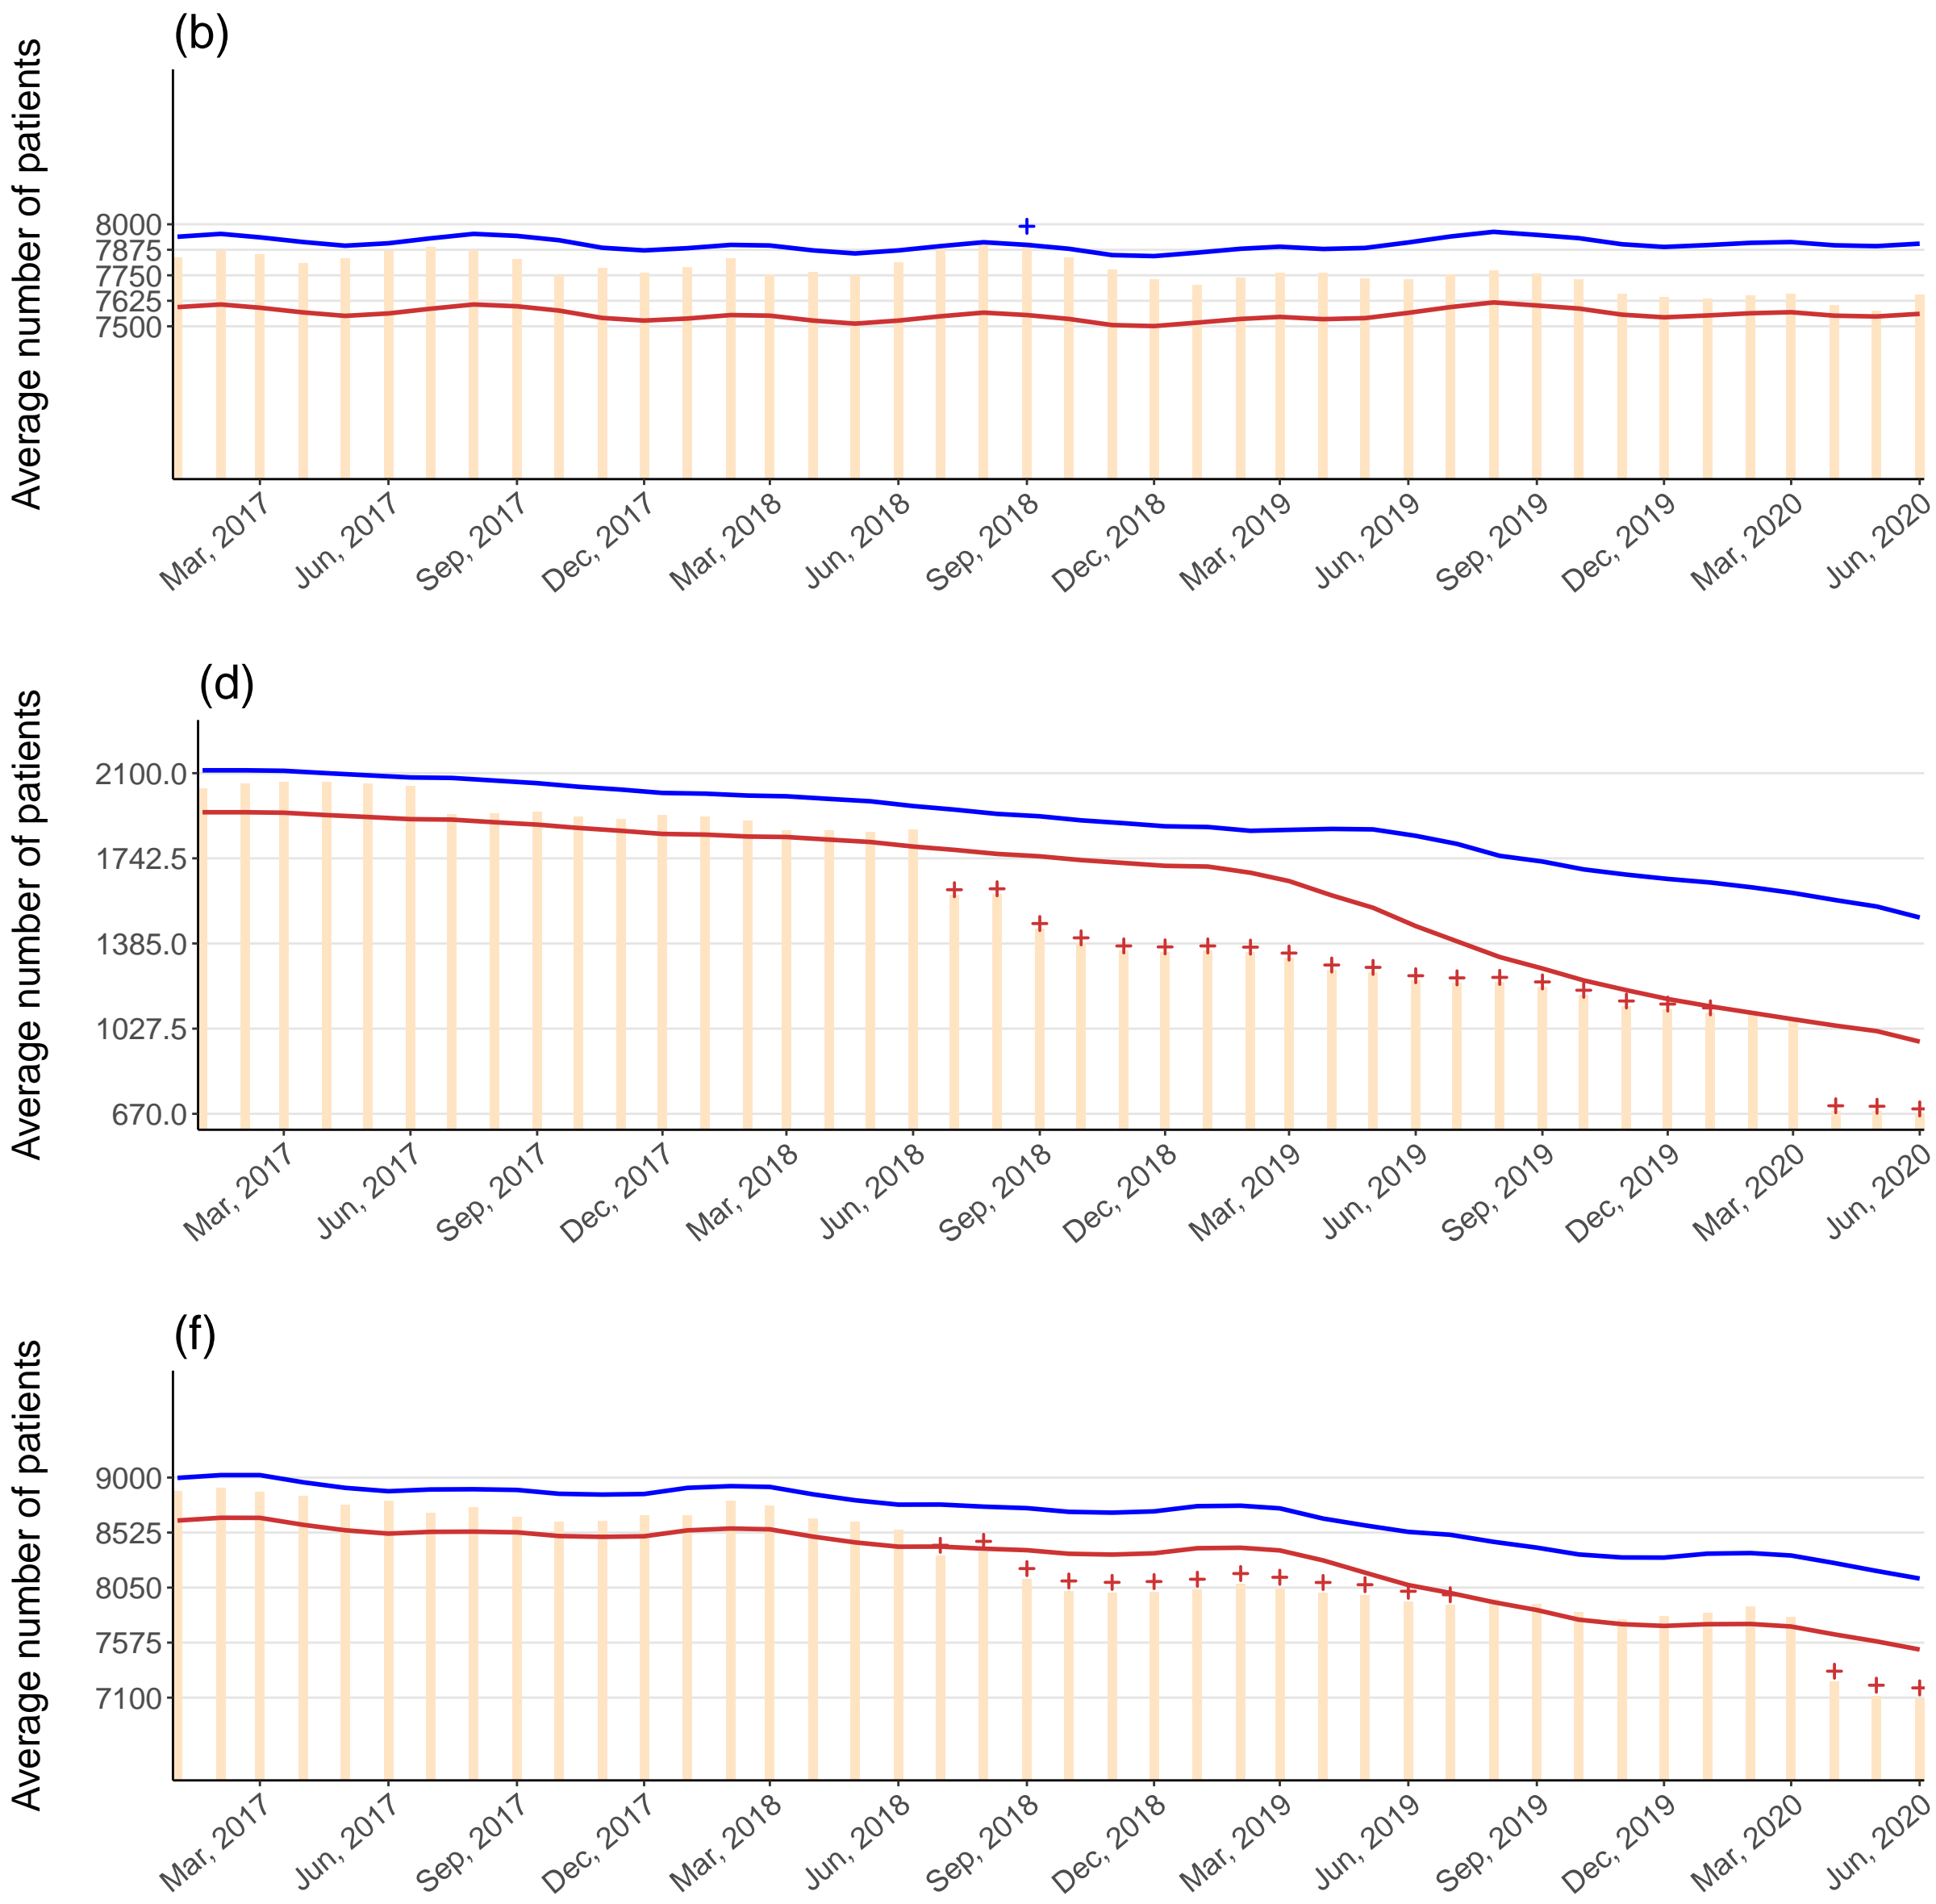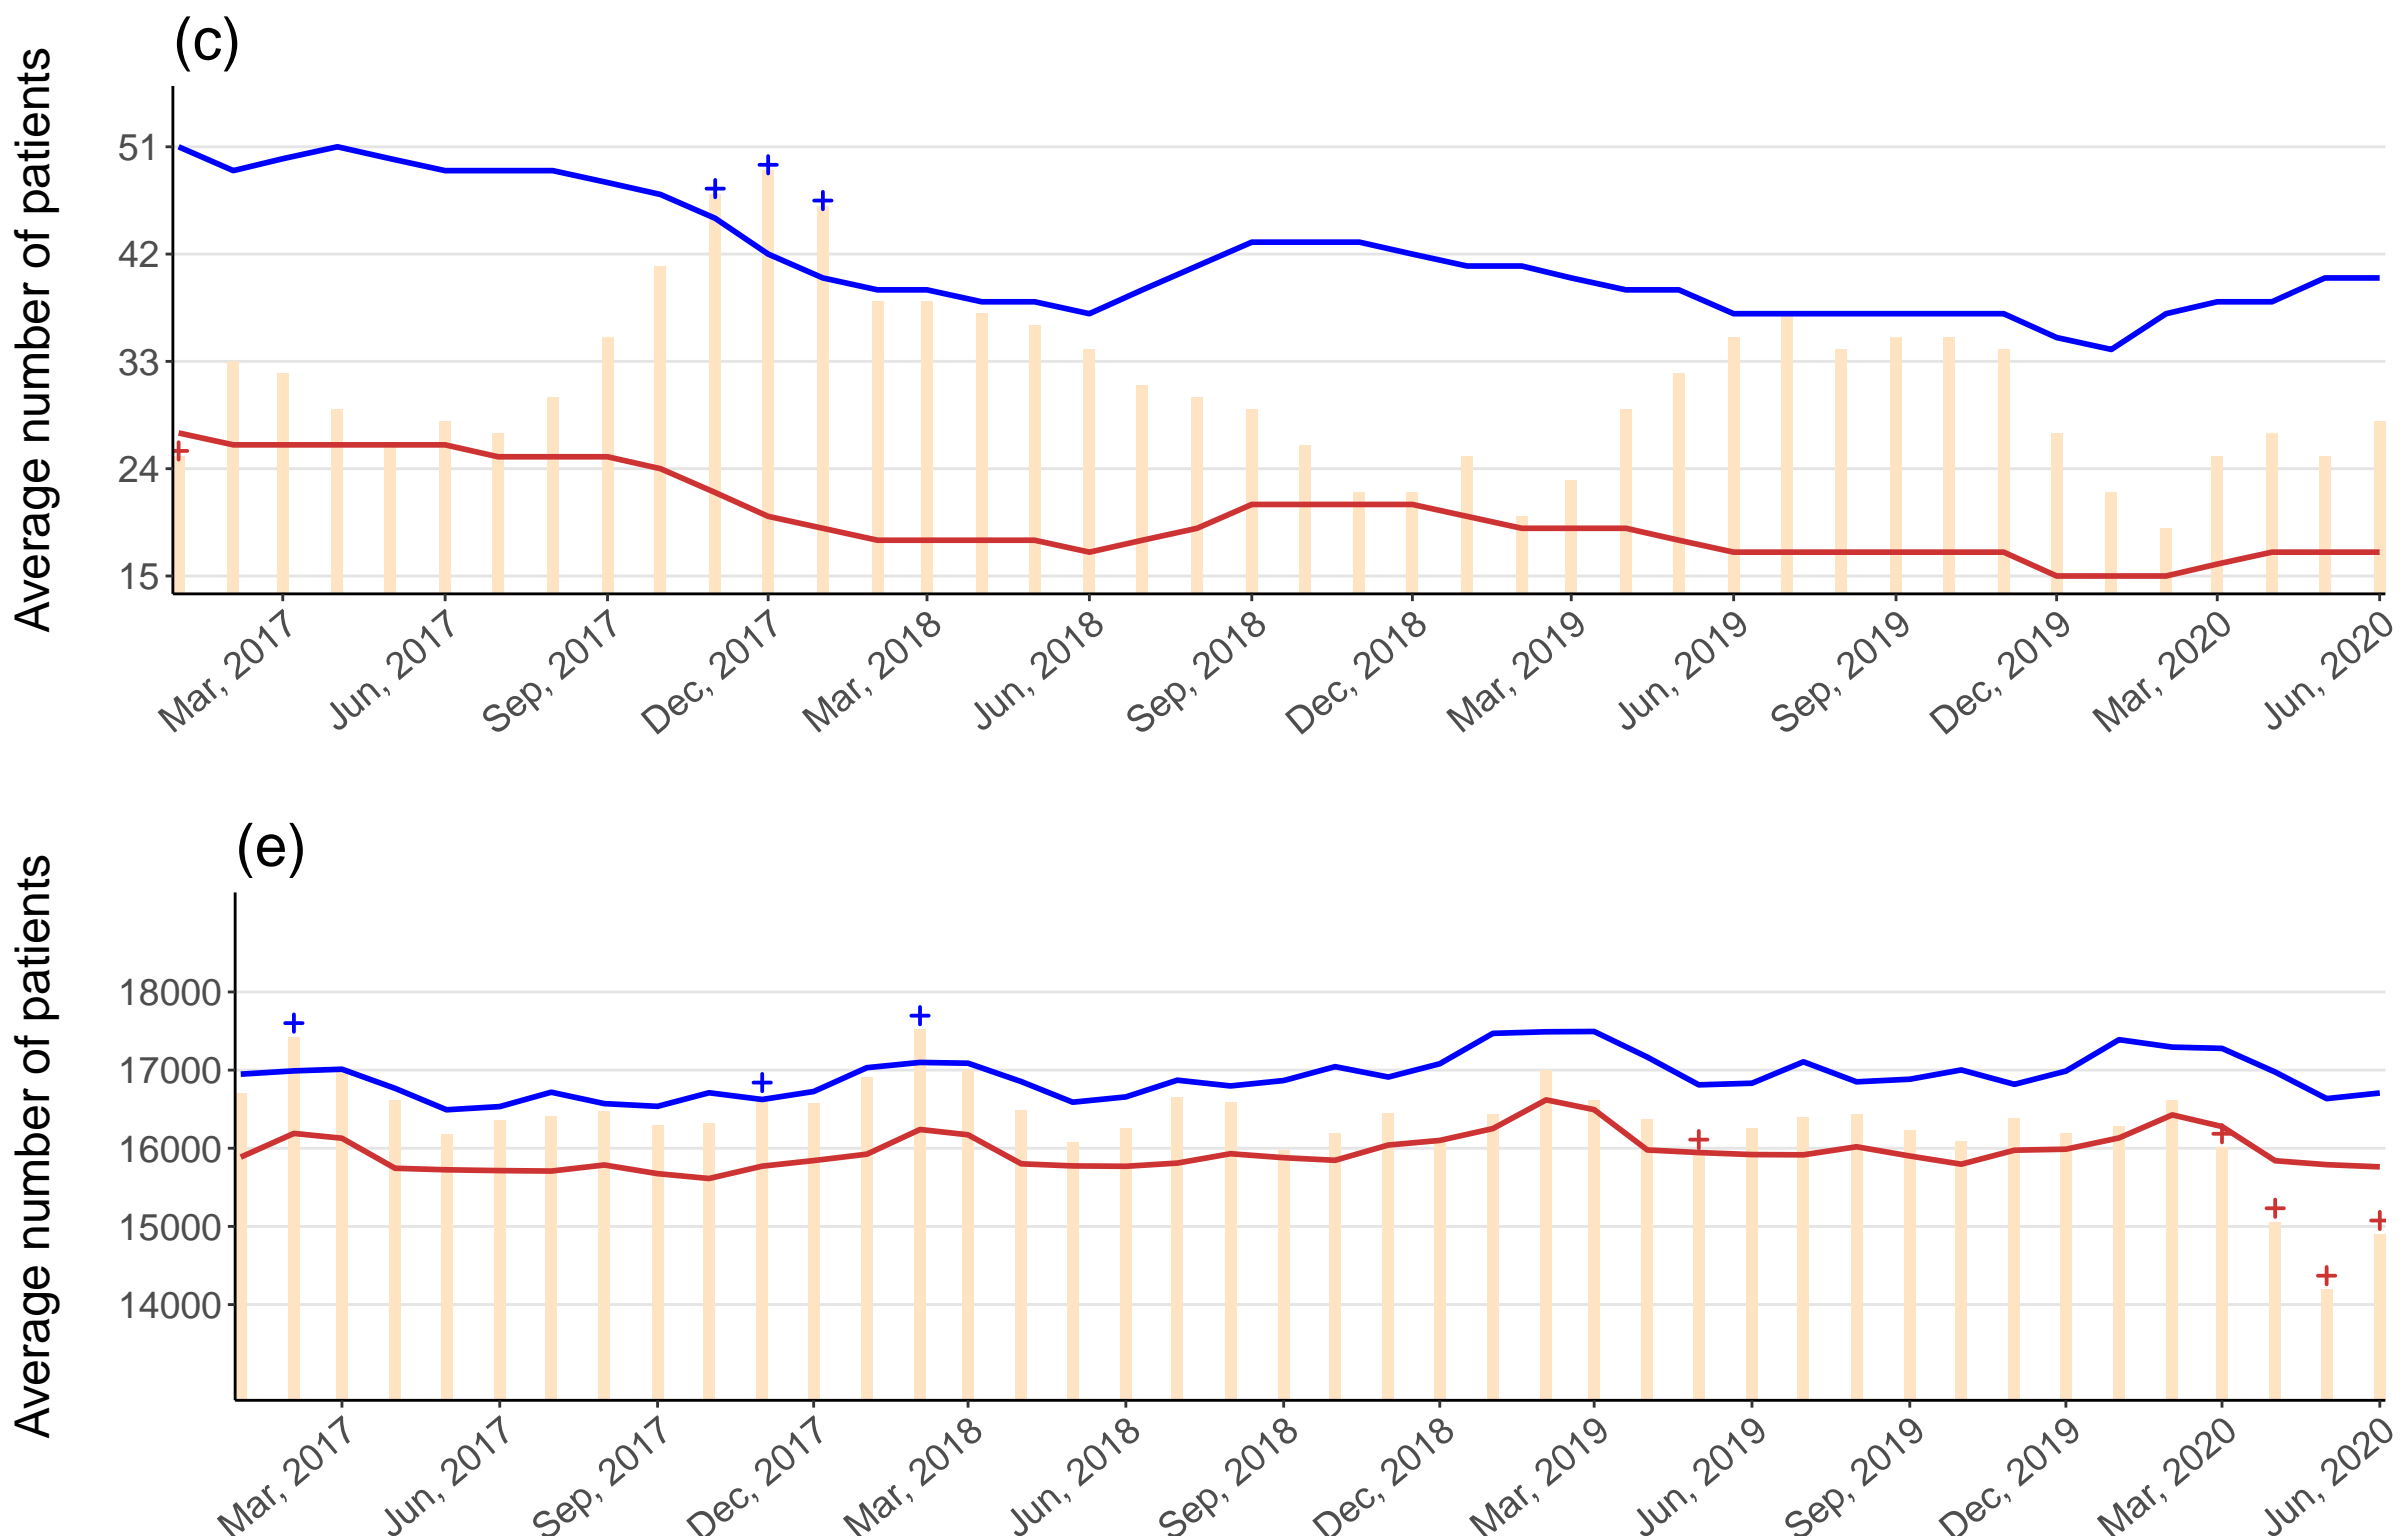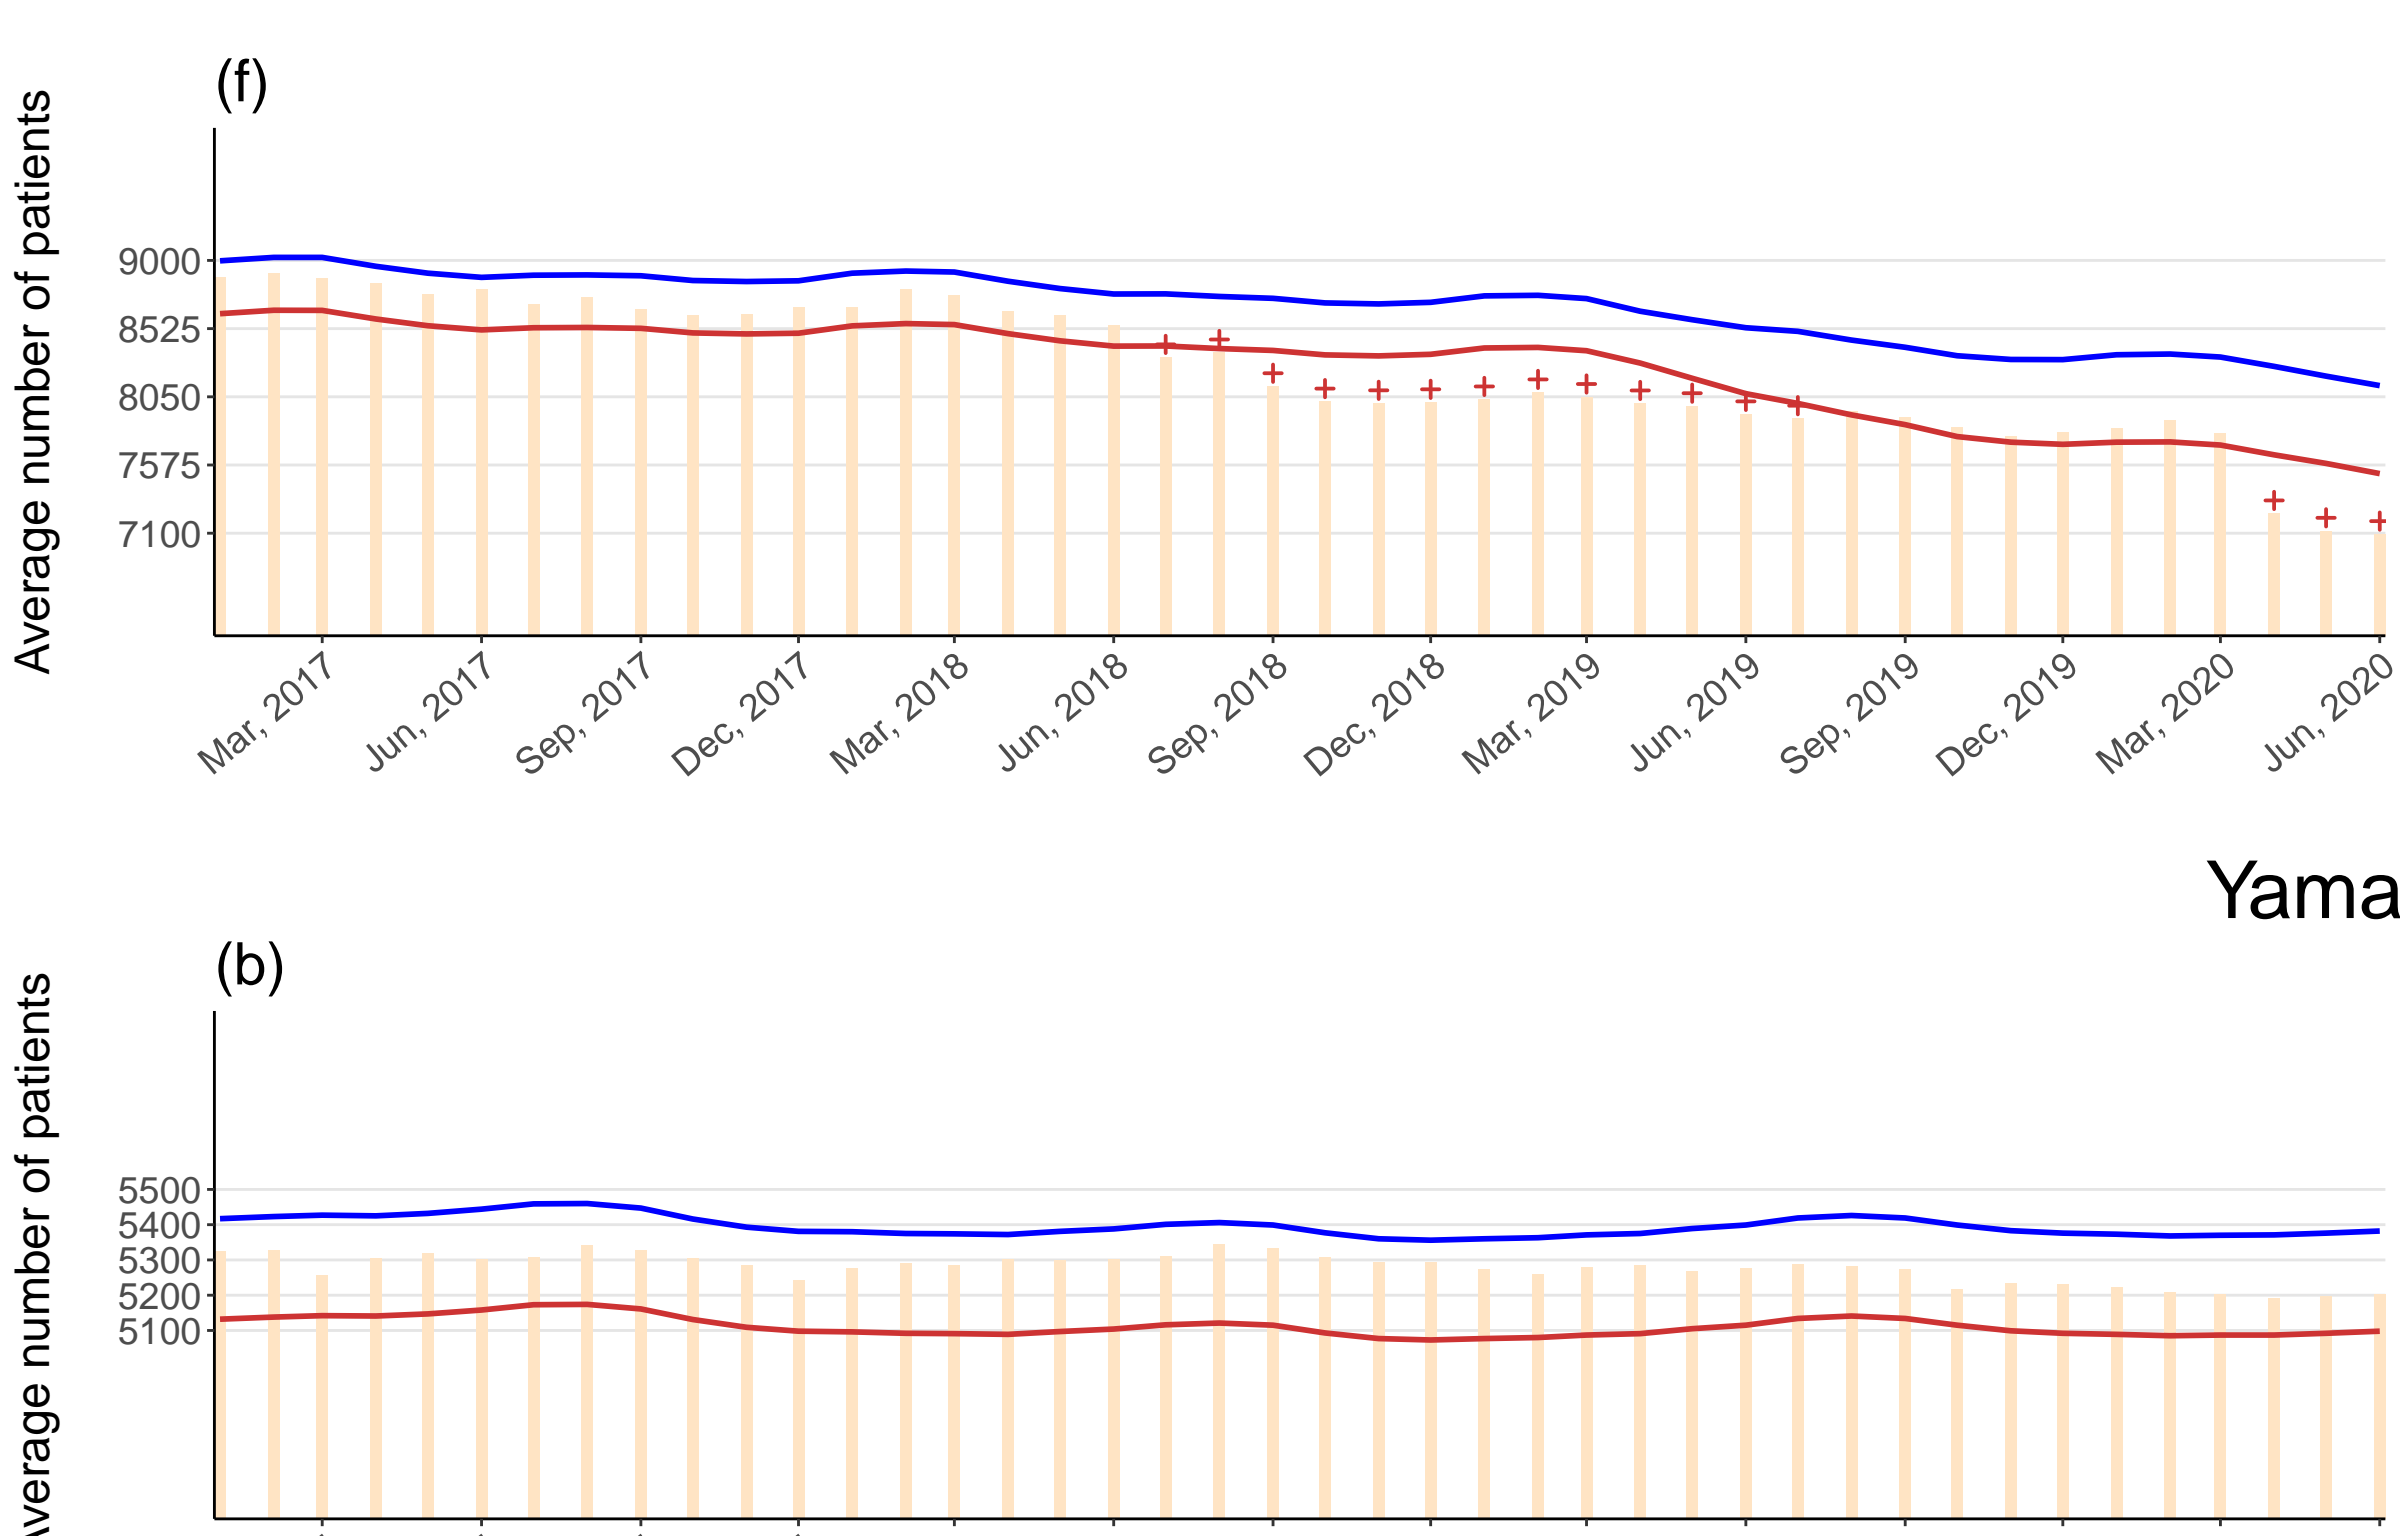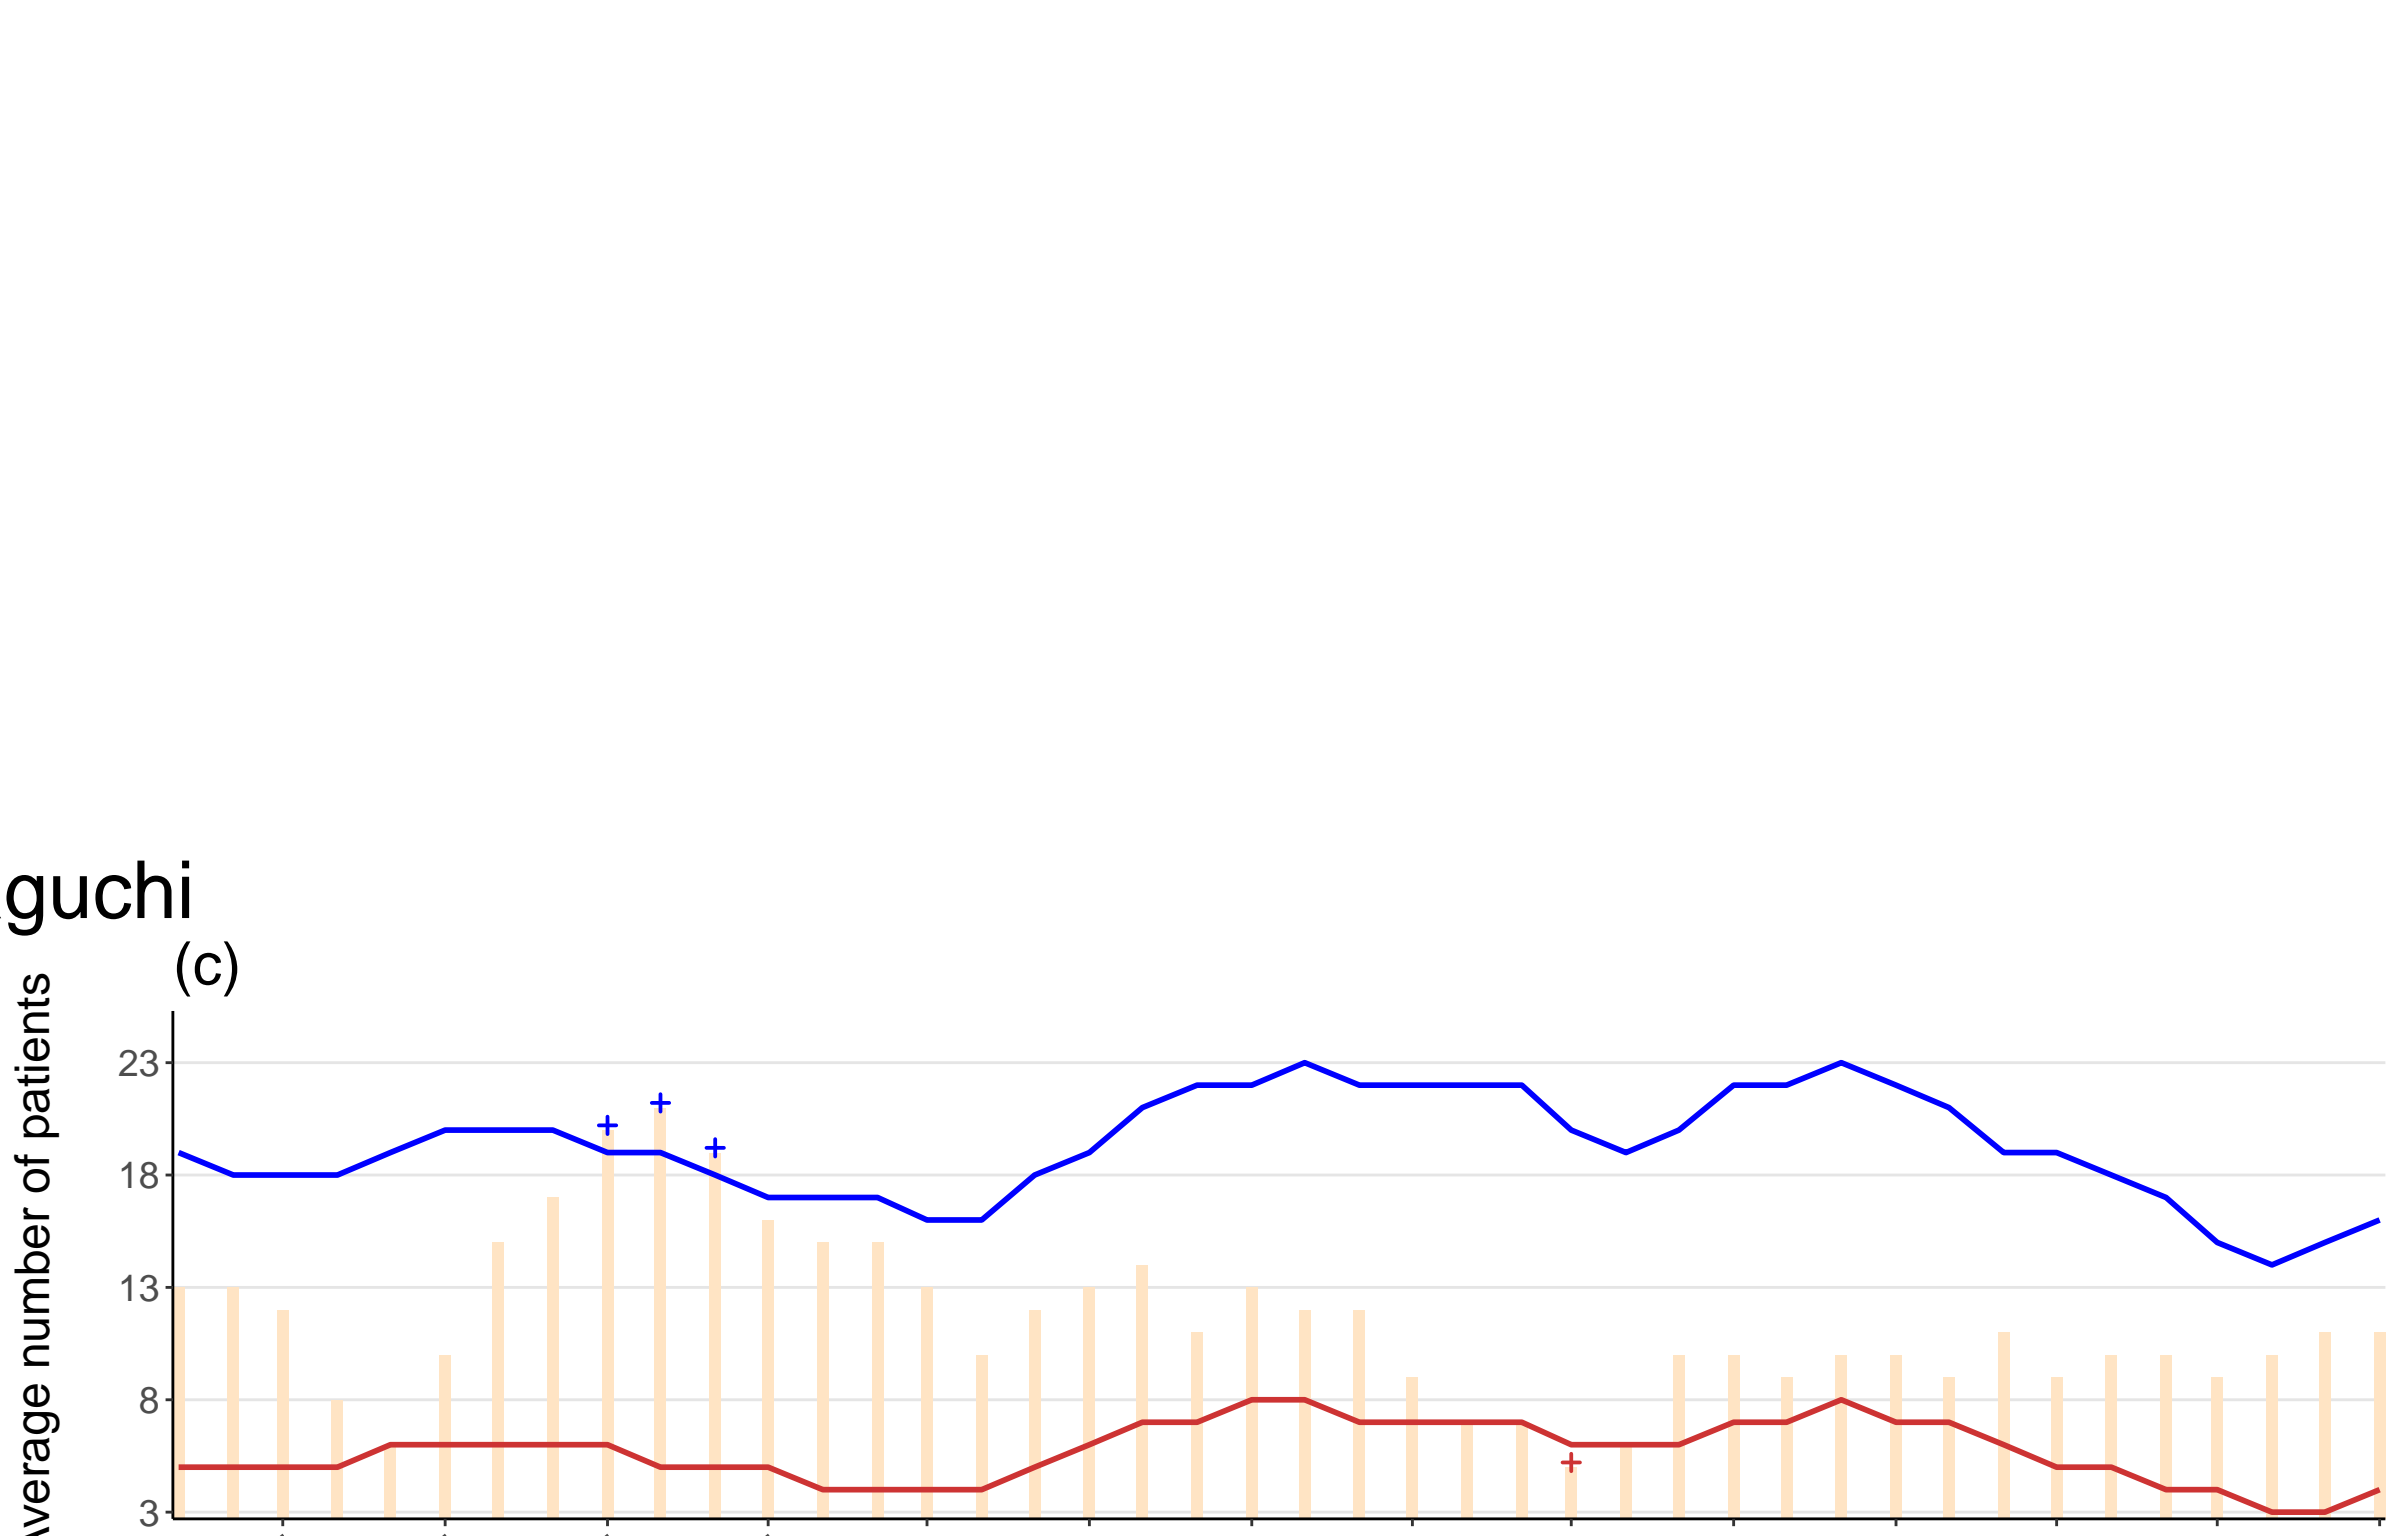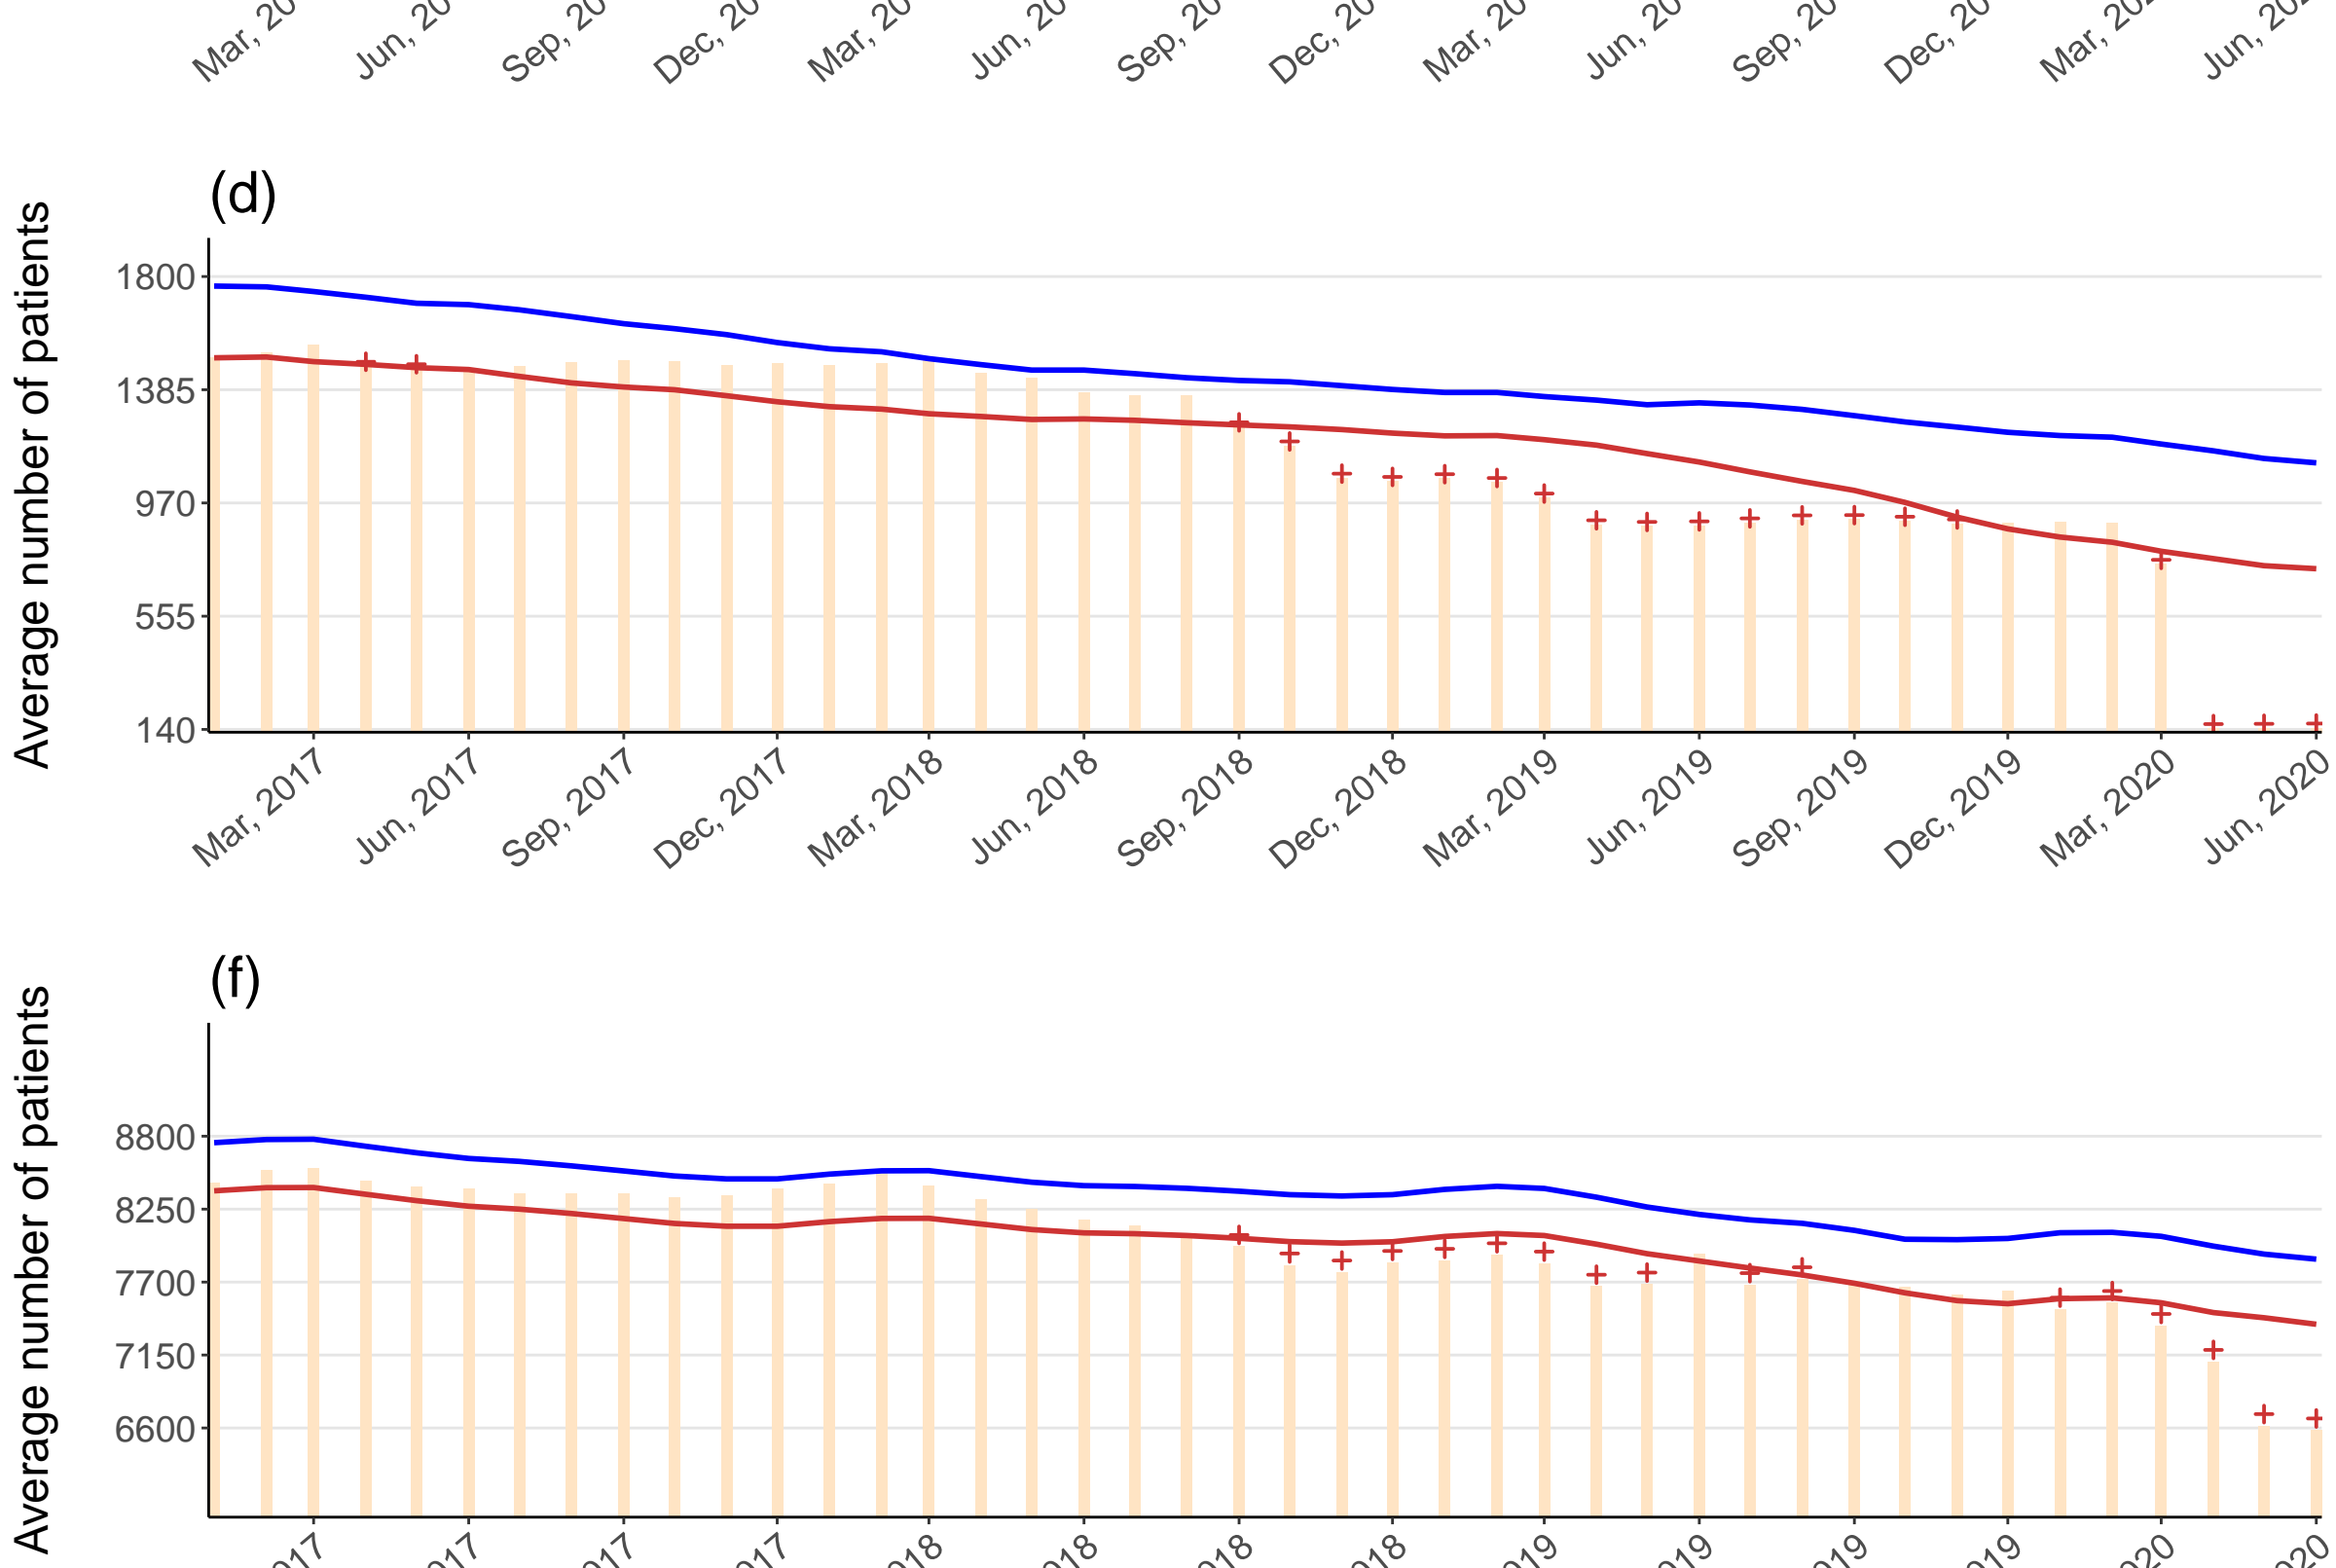

Yamaguchi

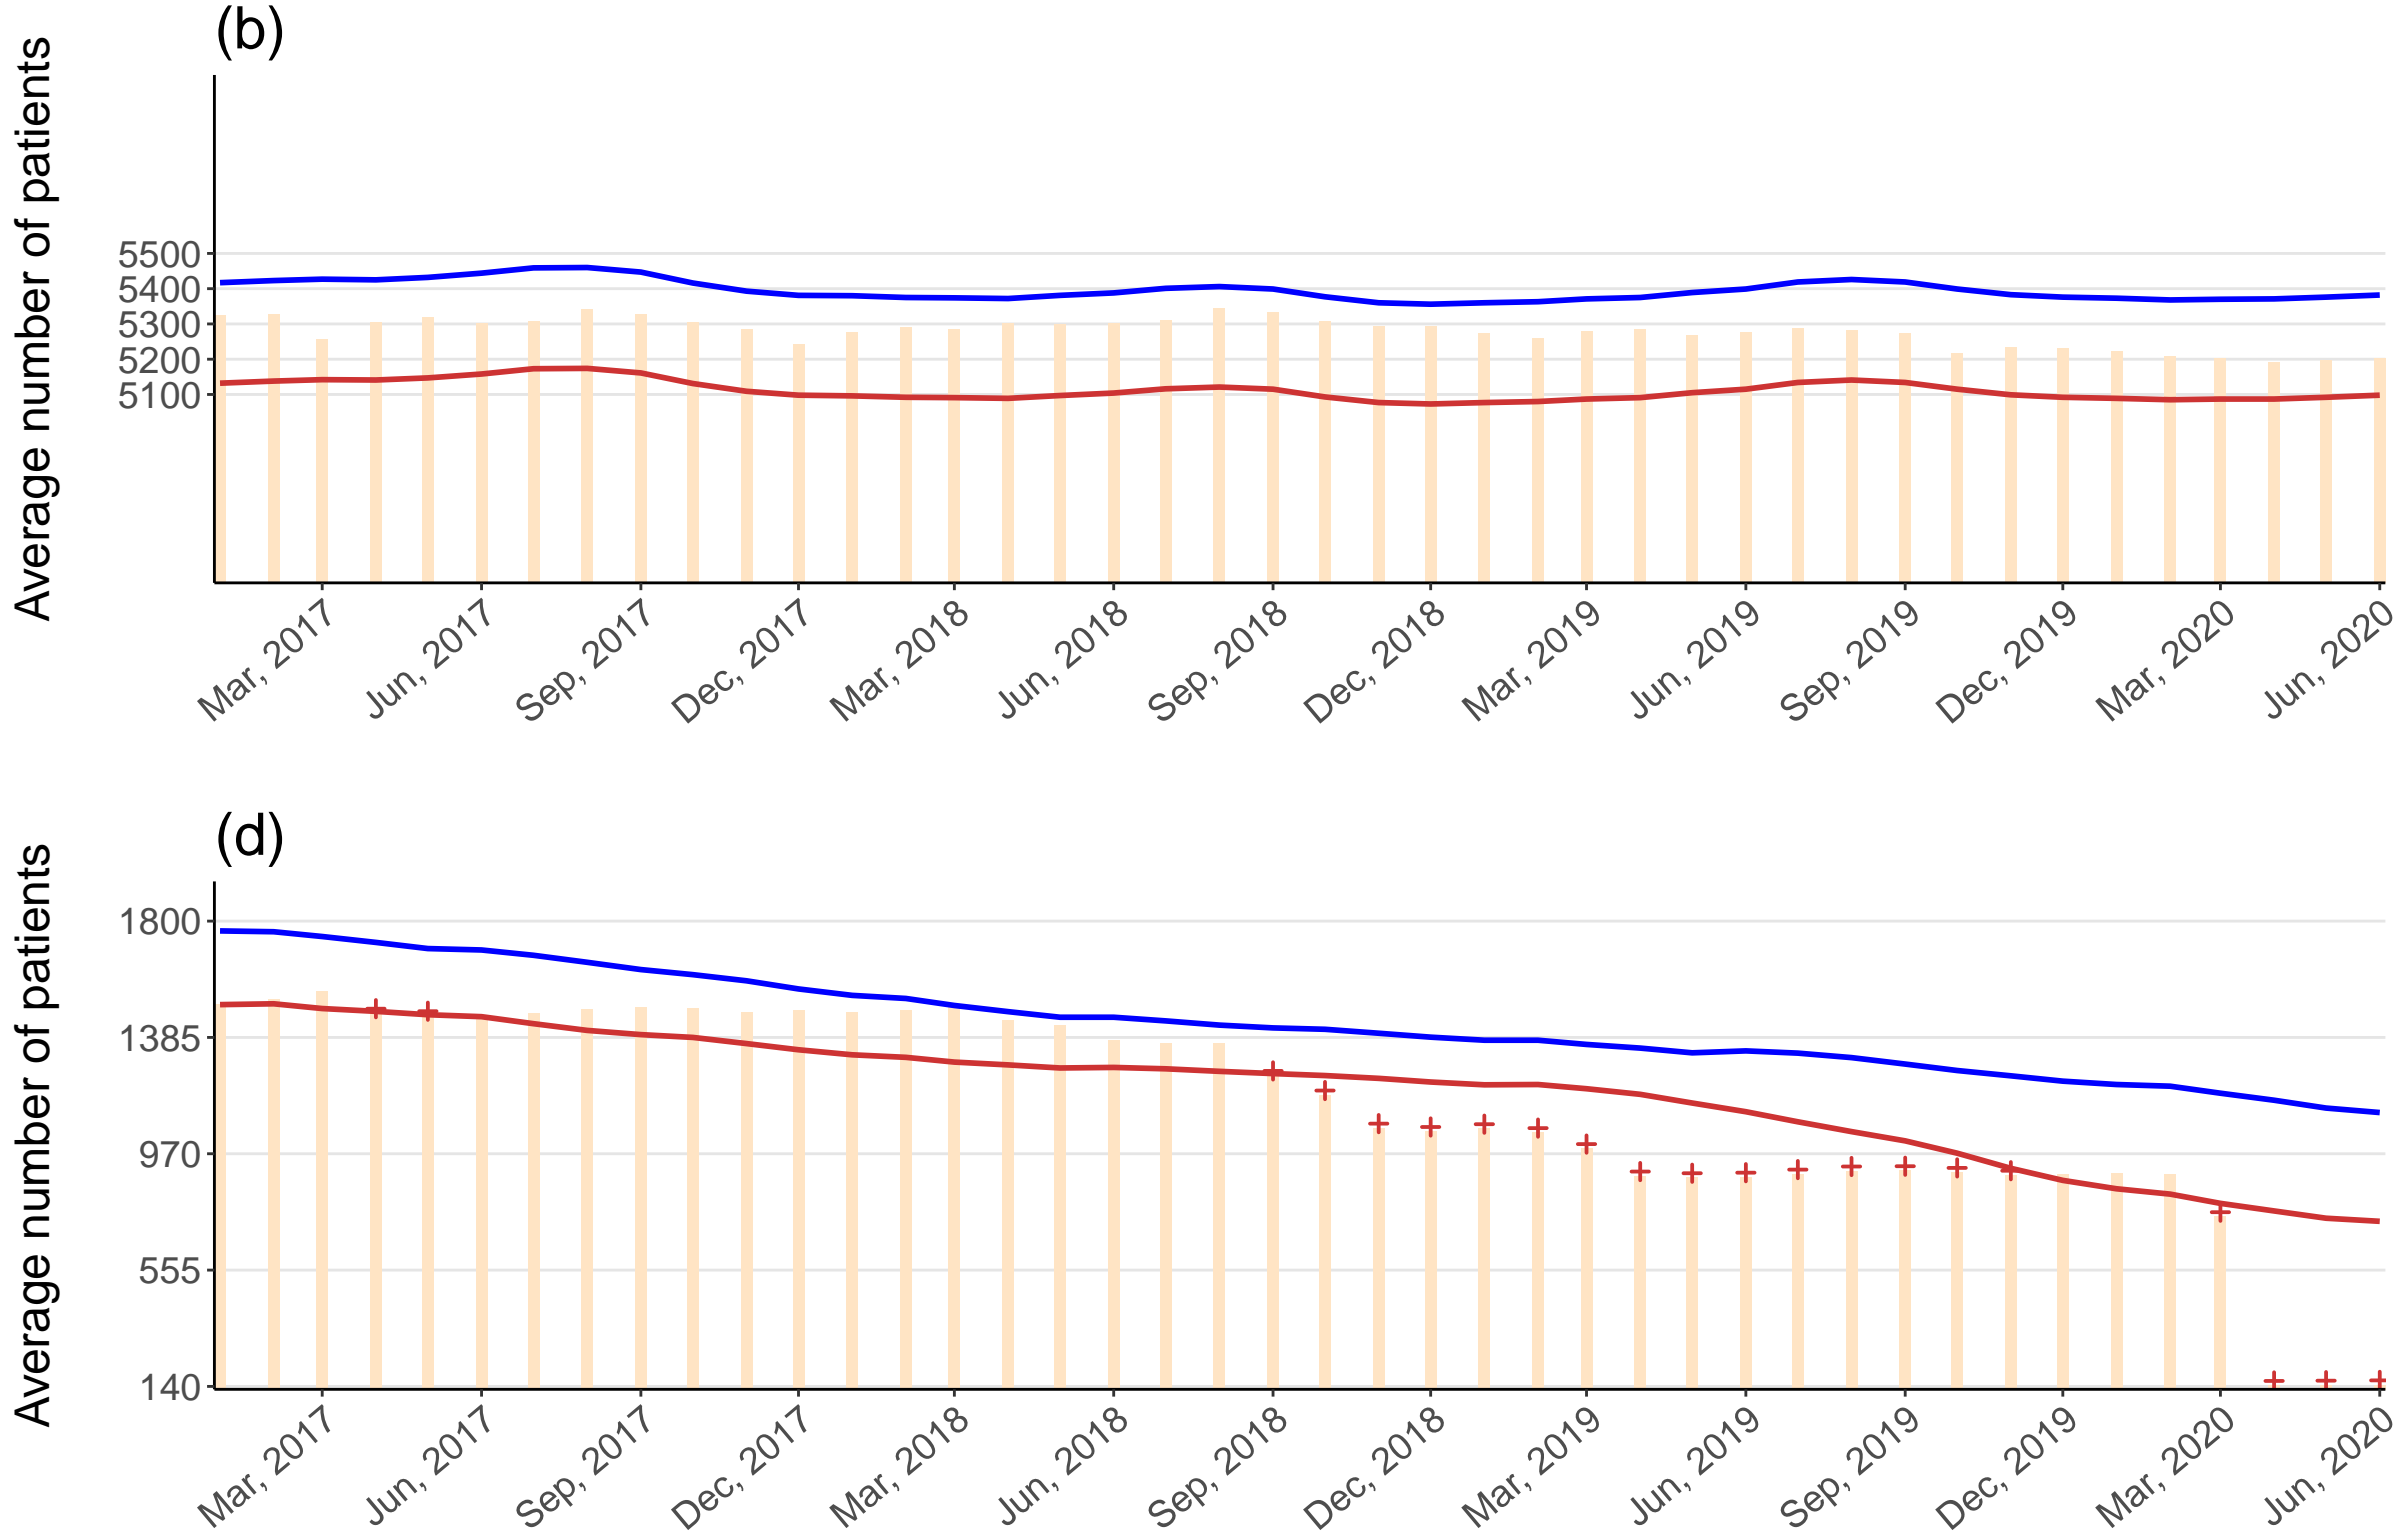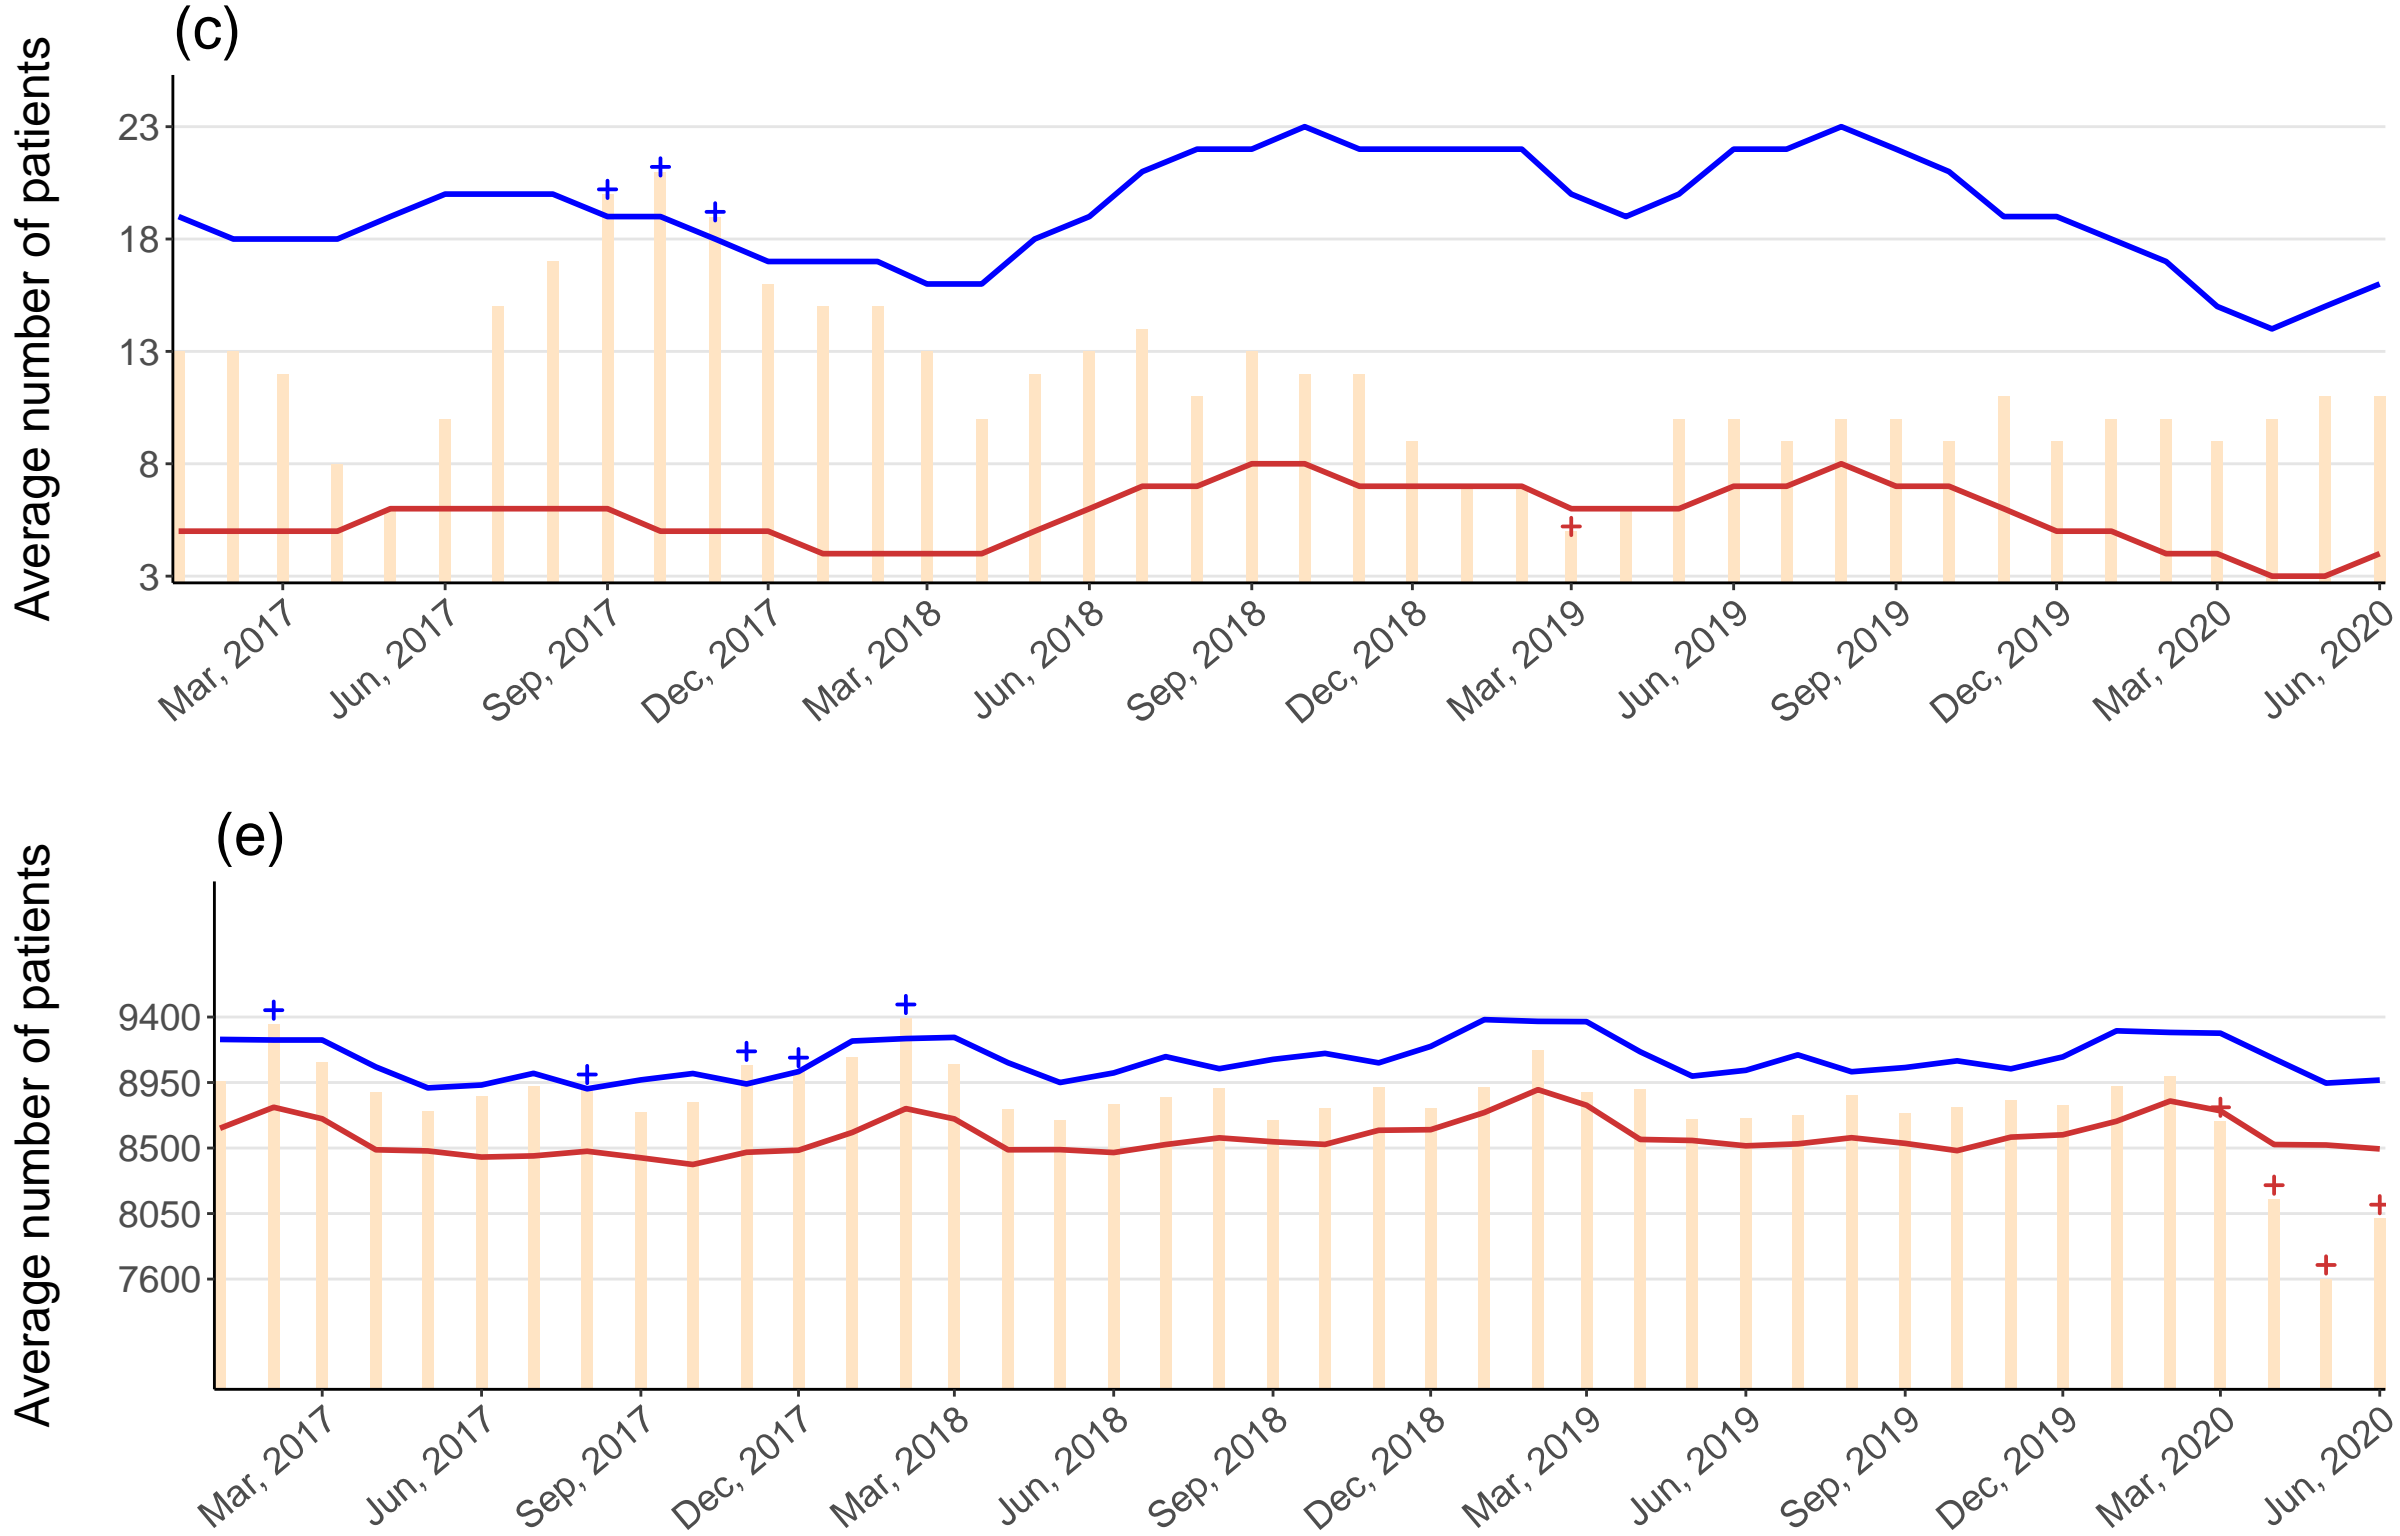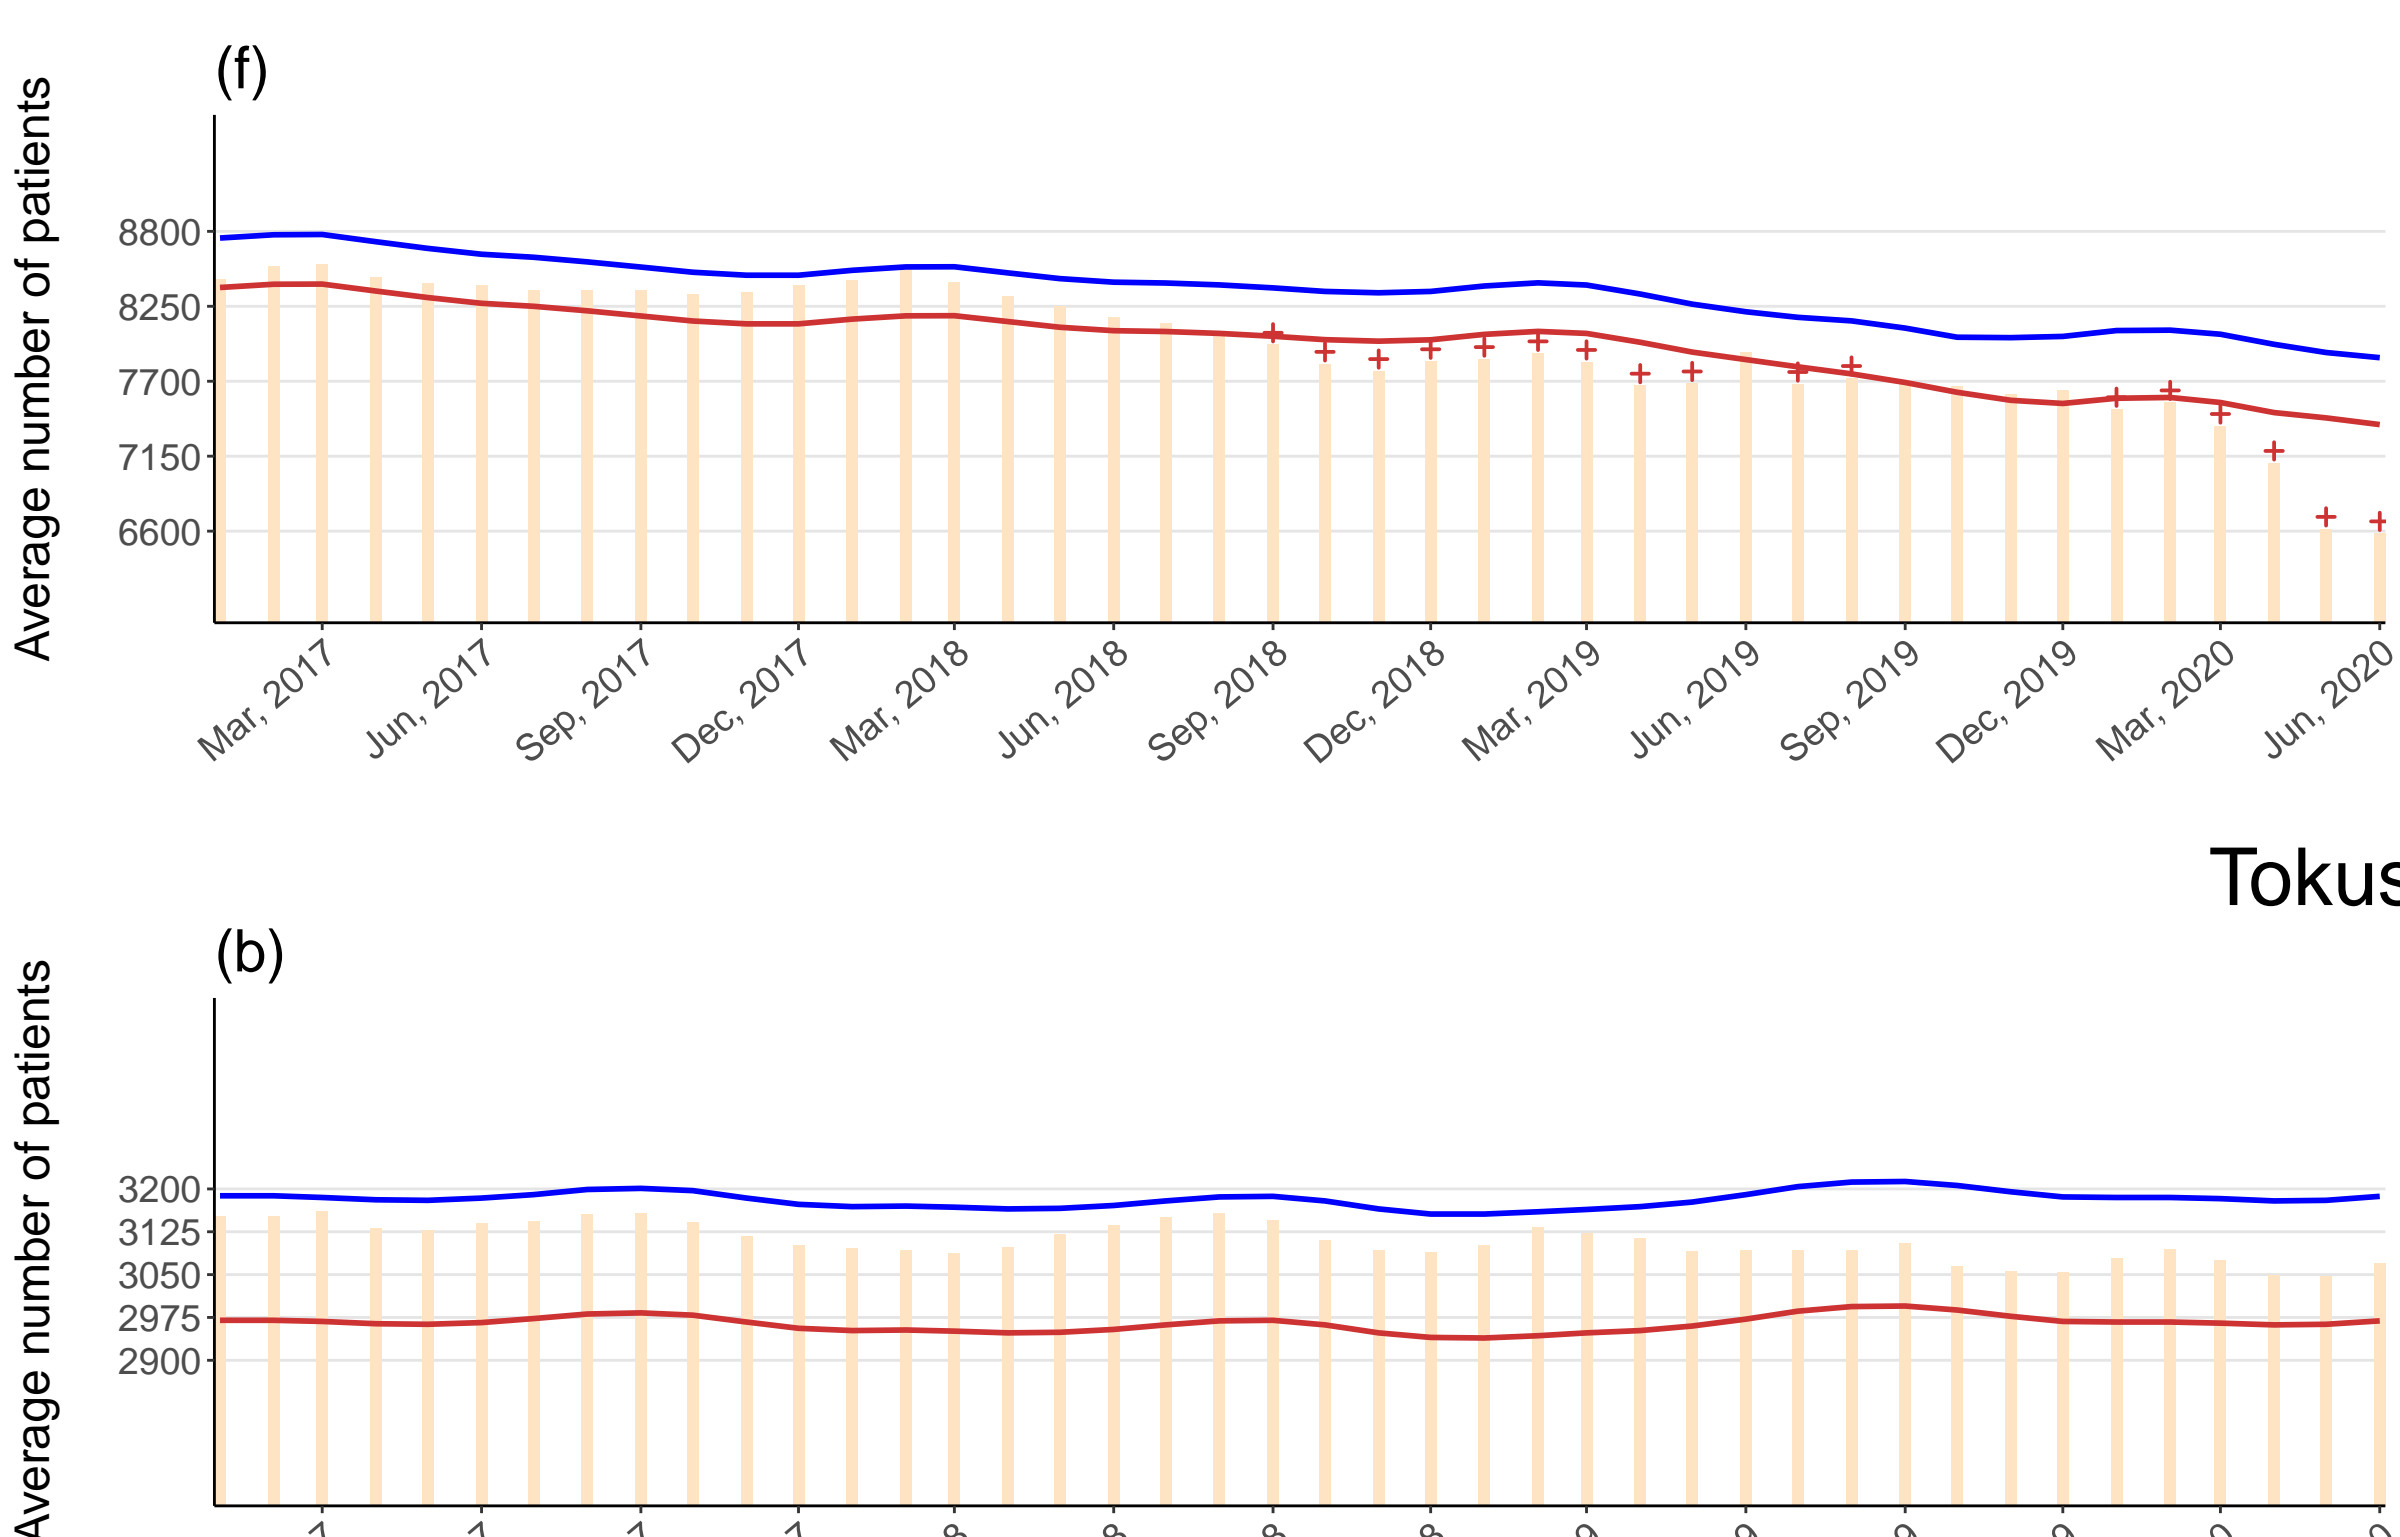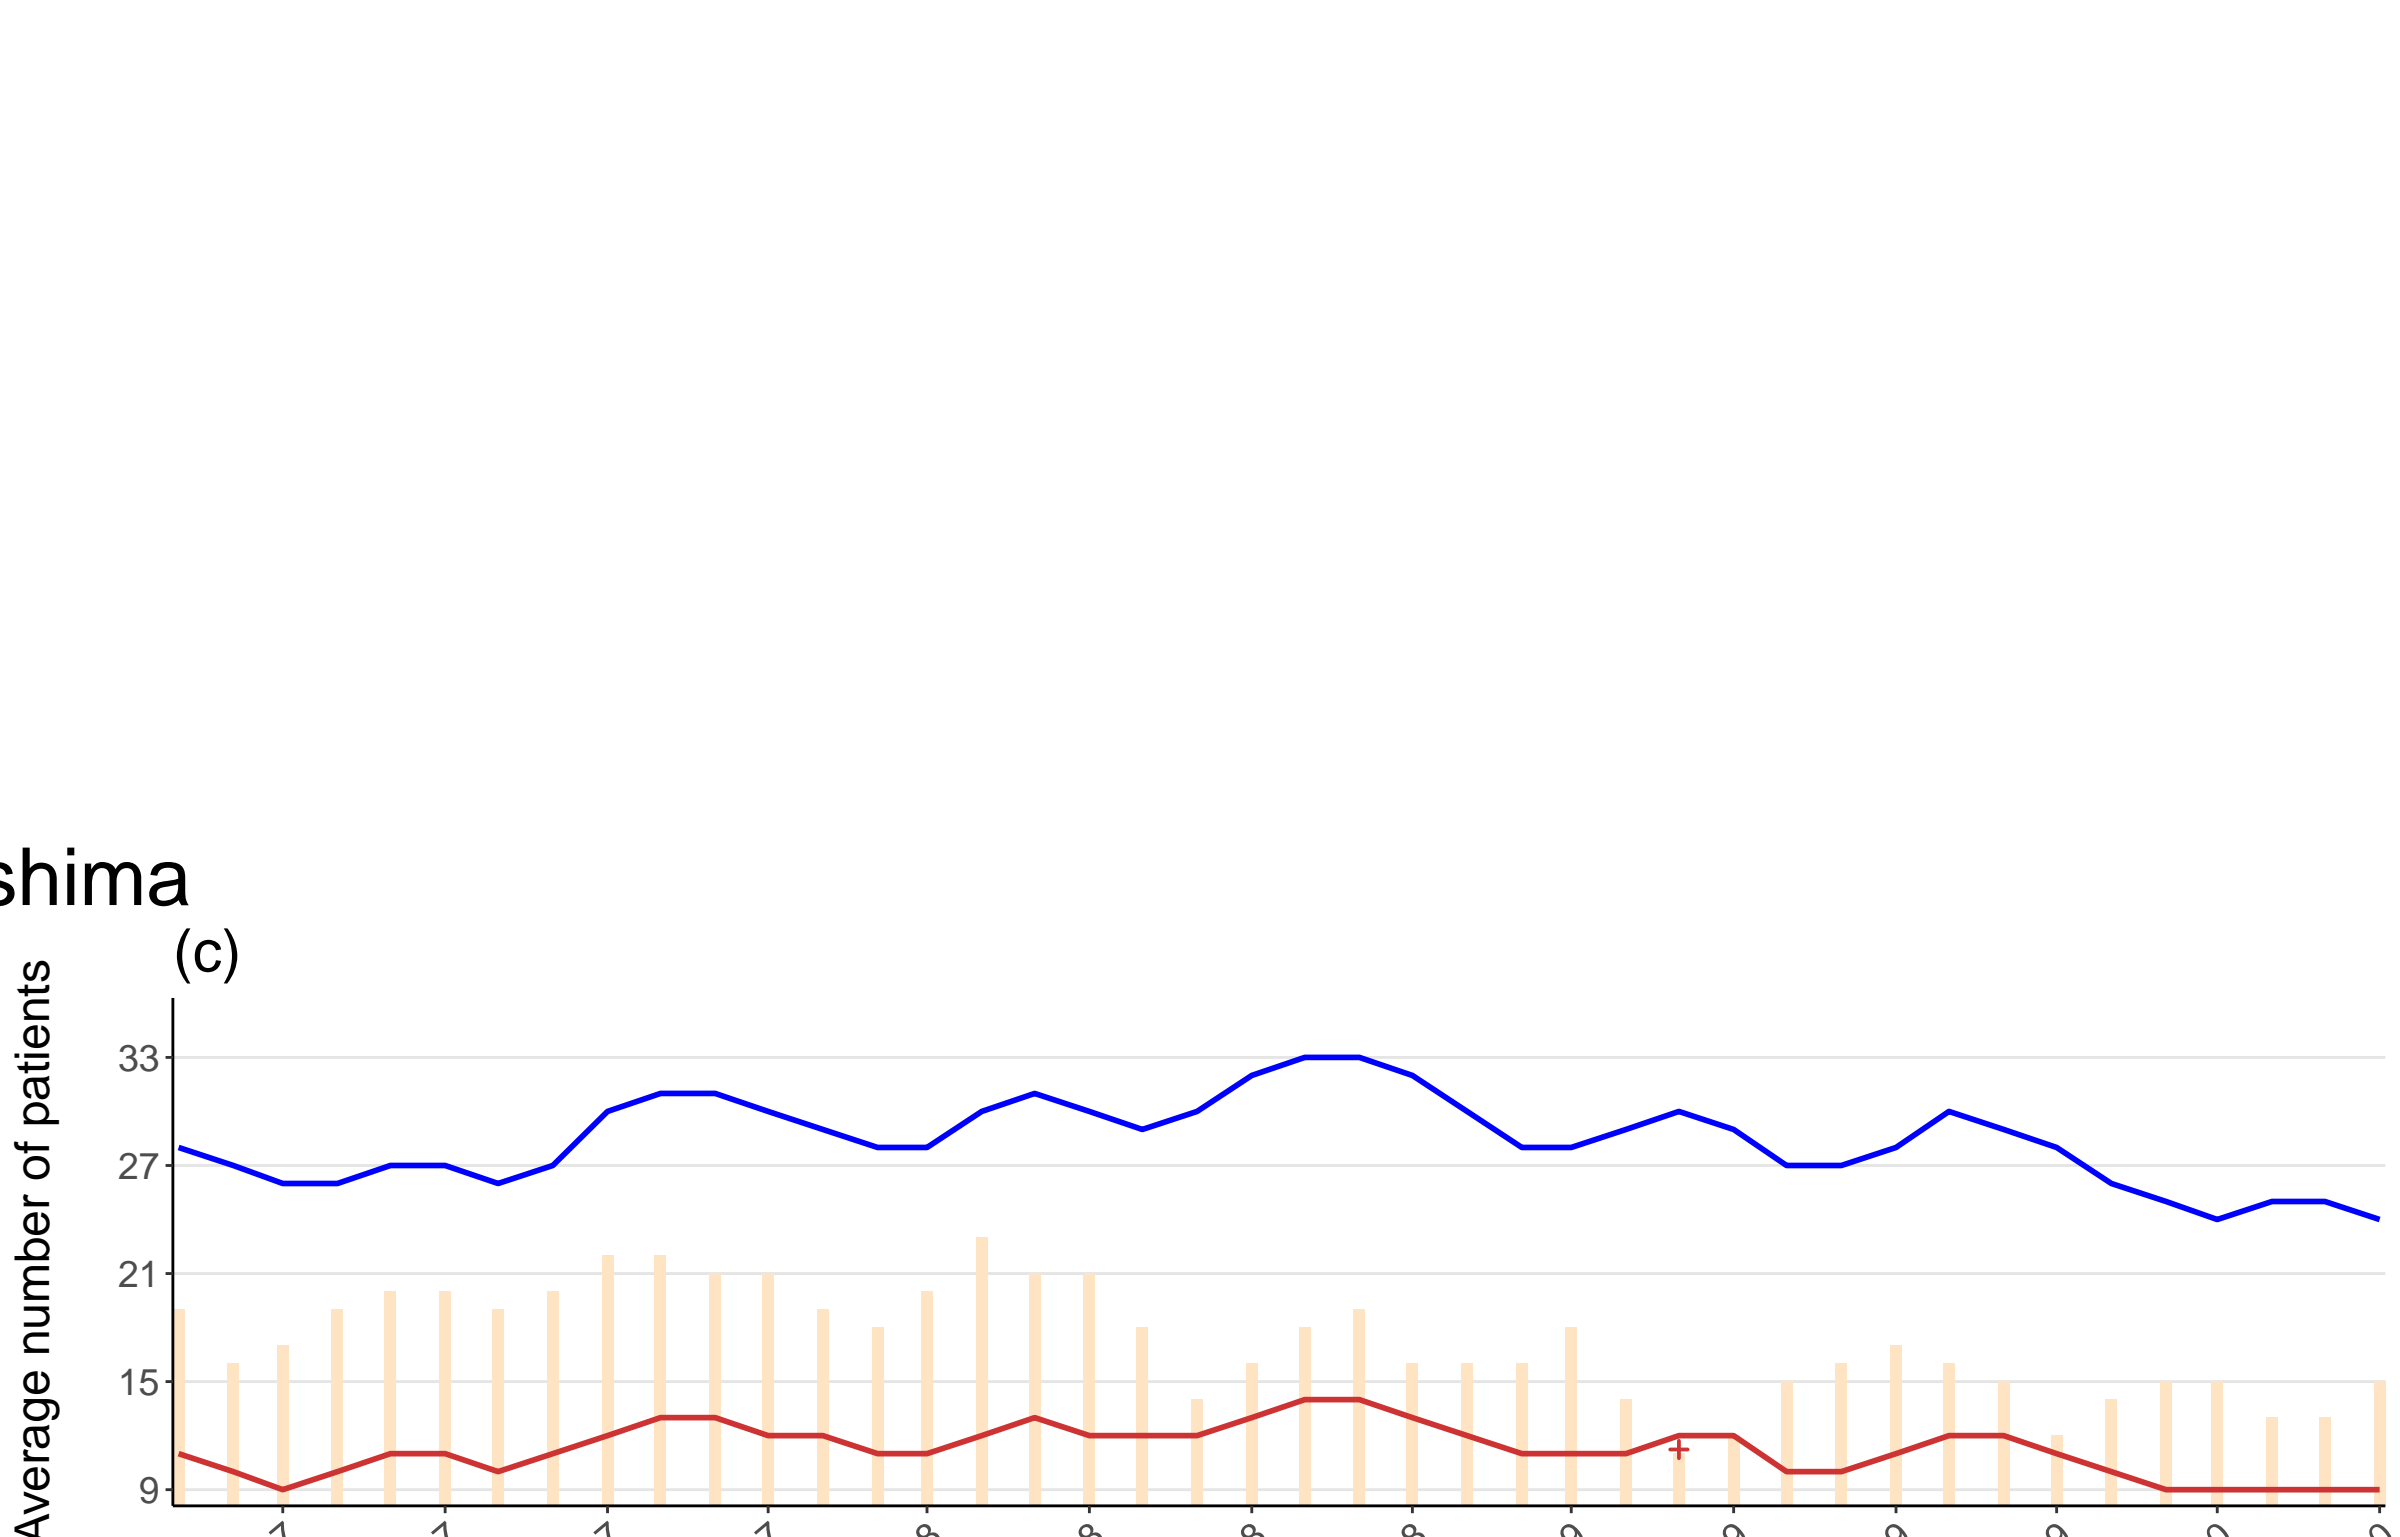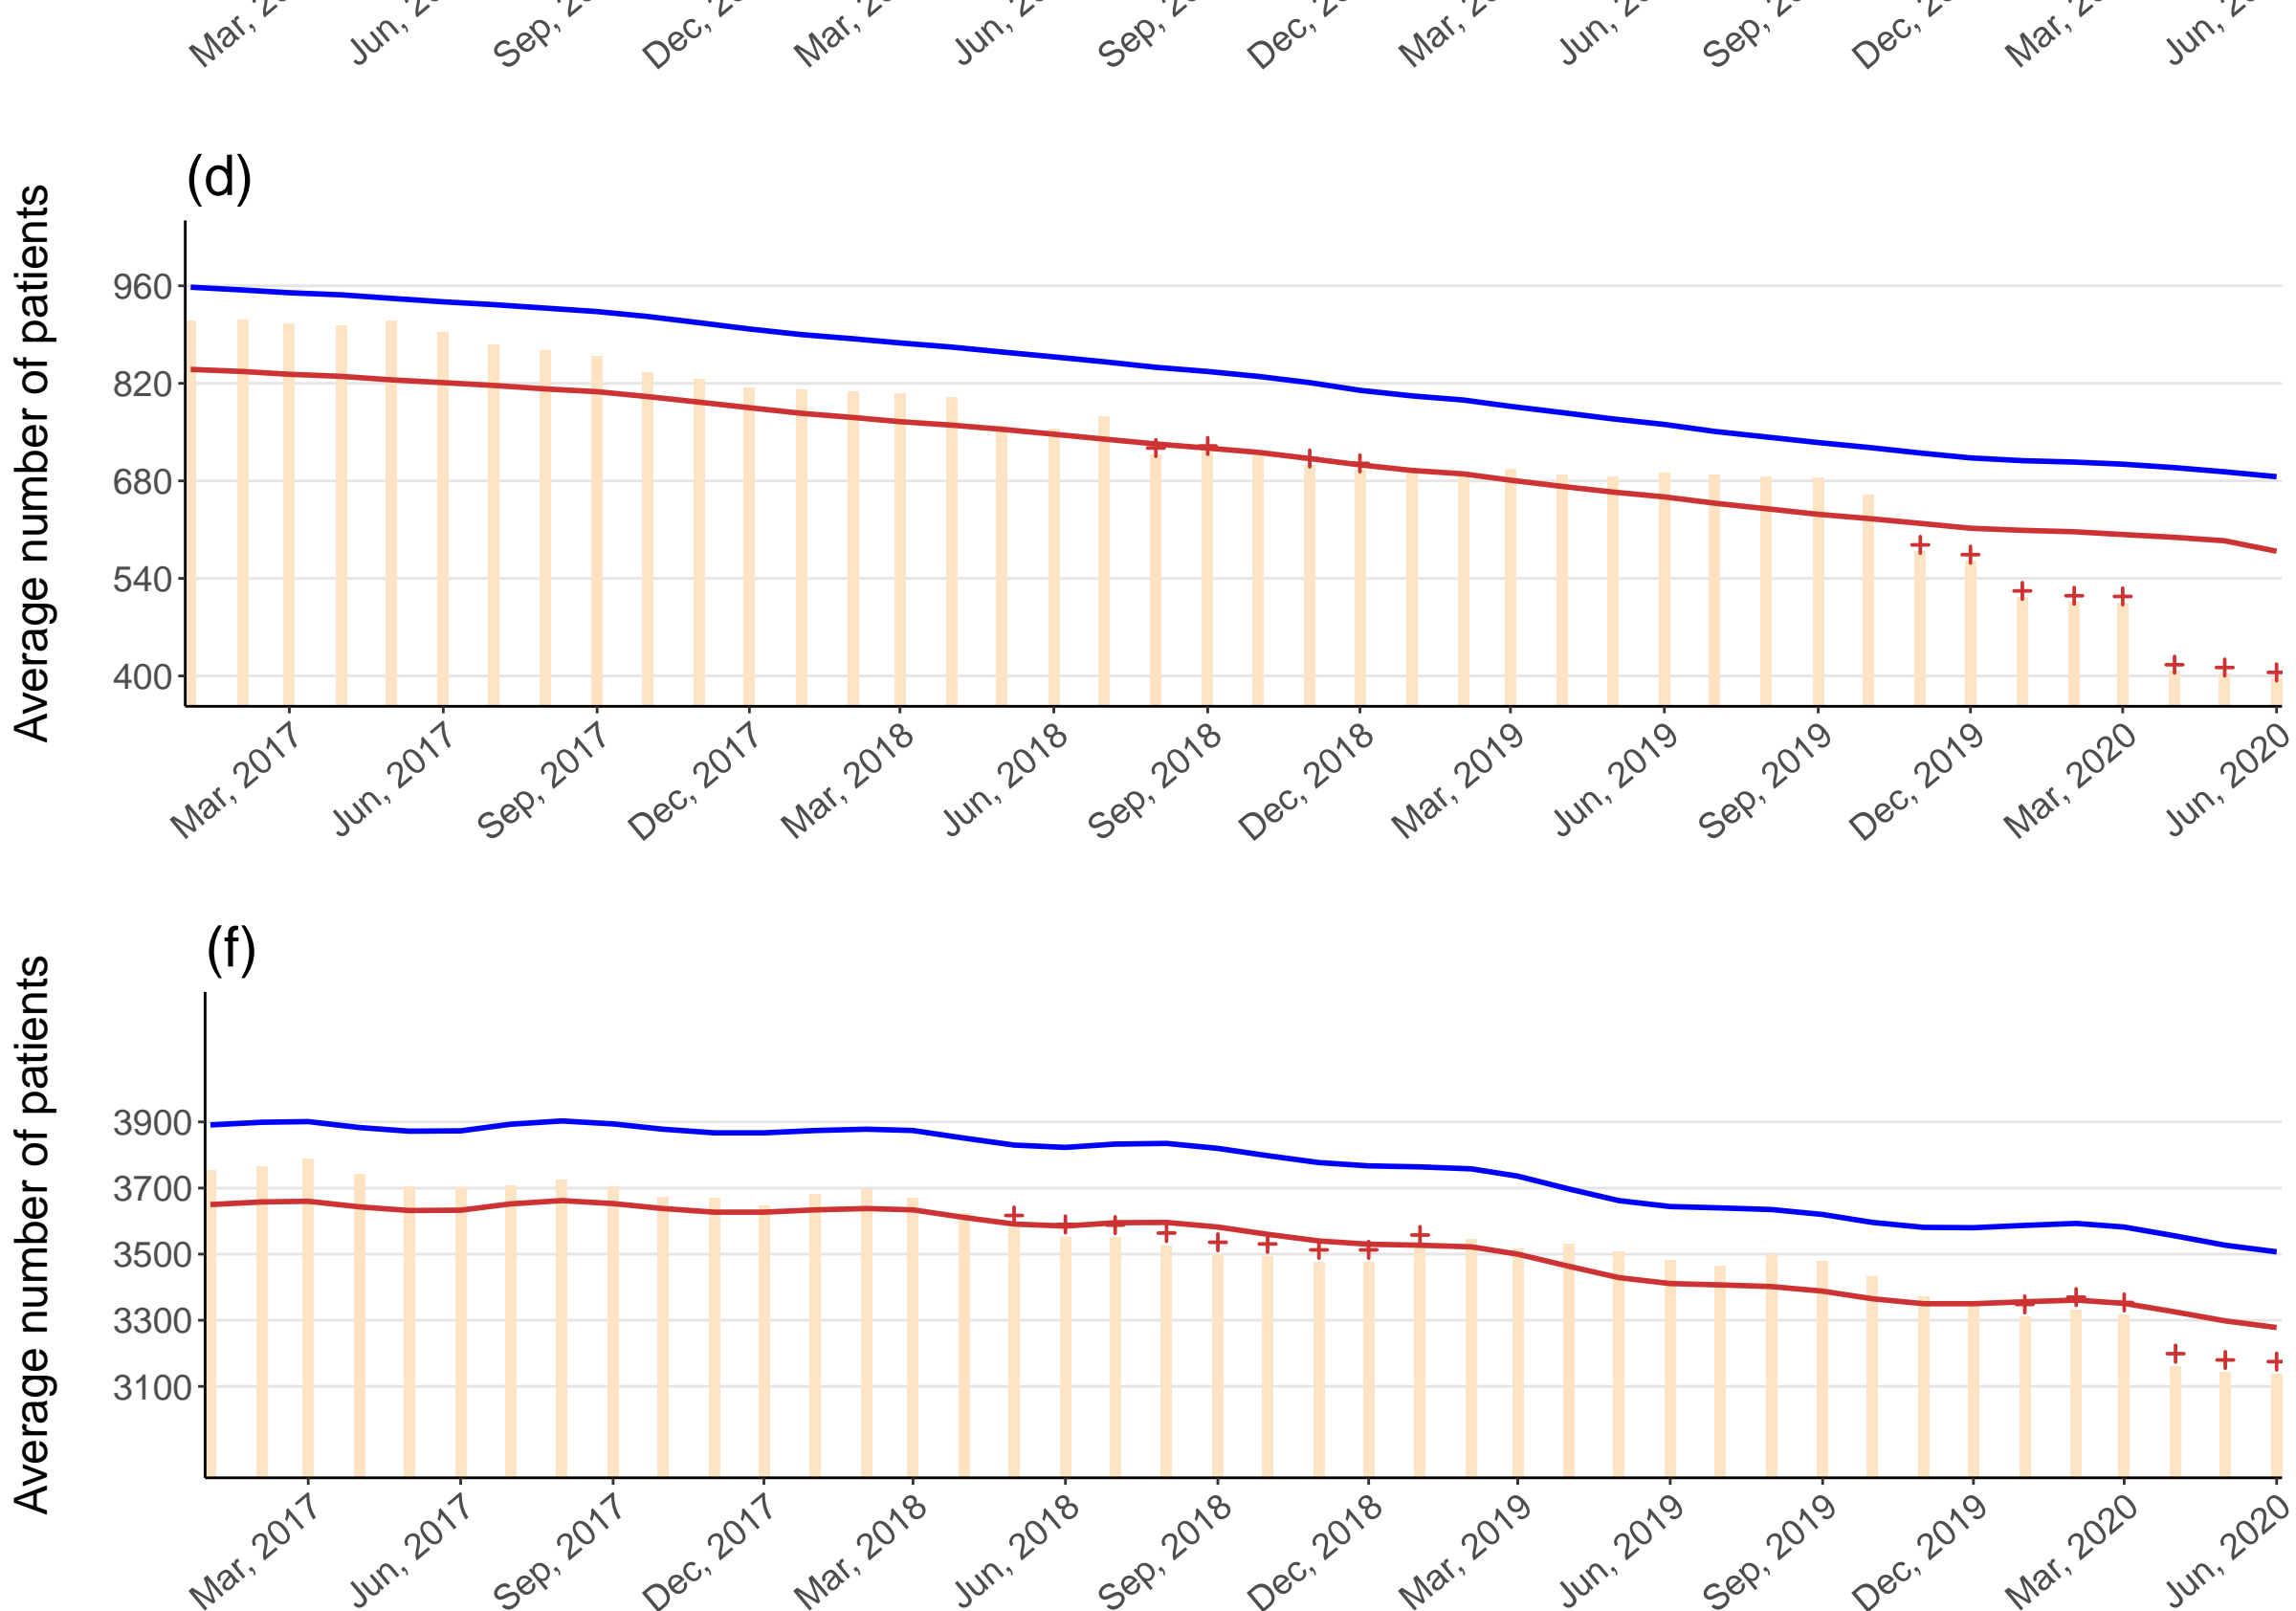

Tokushima

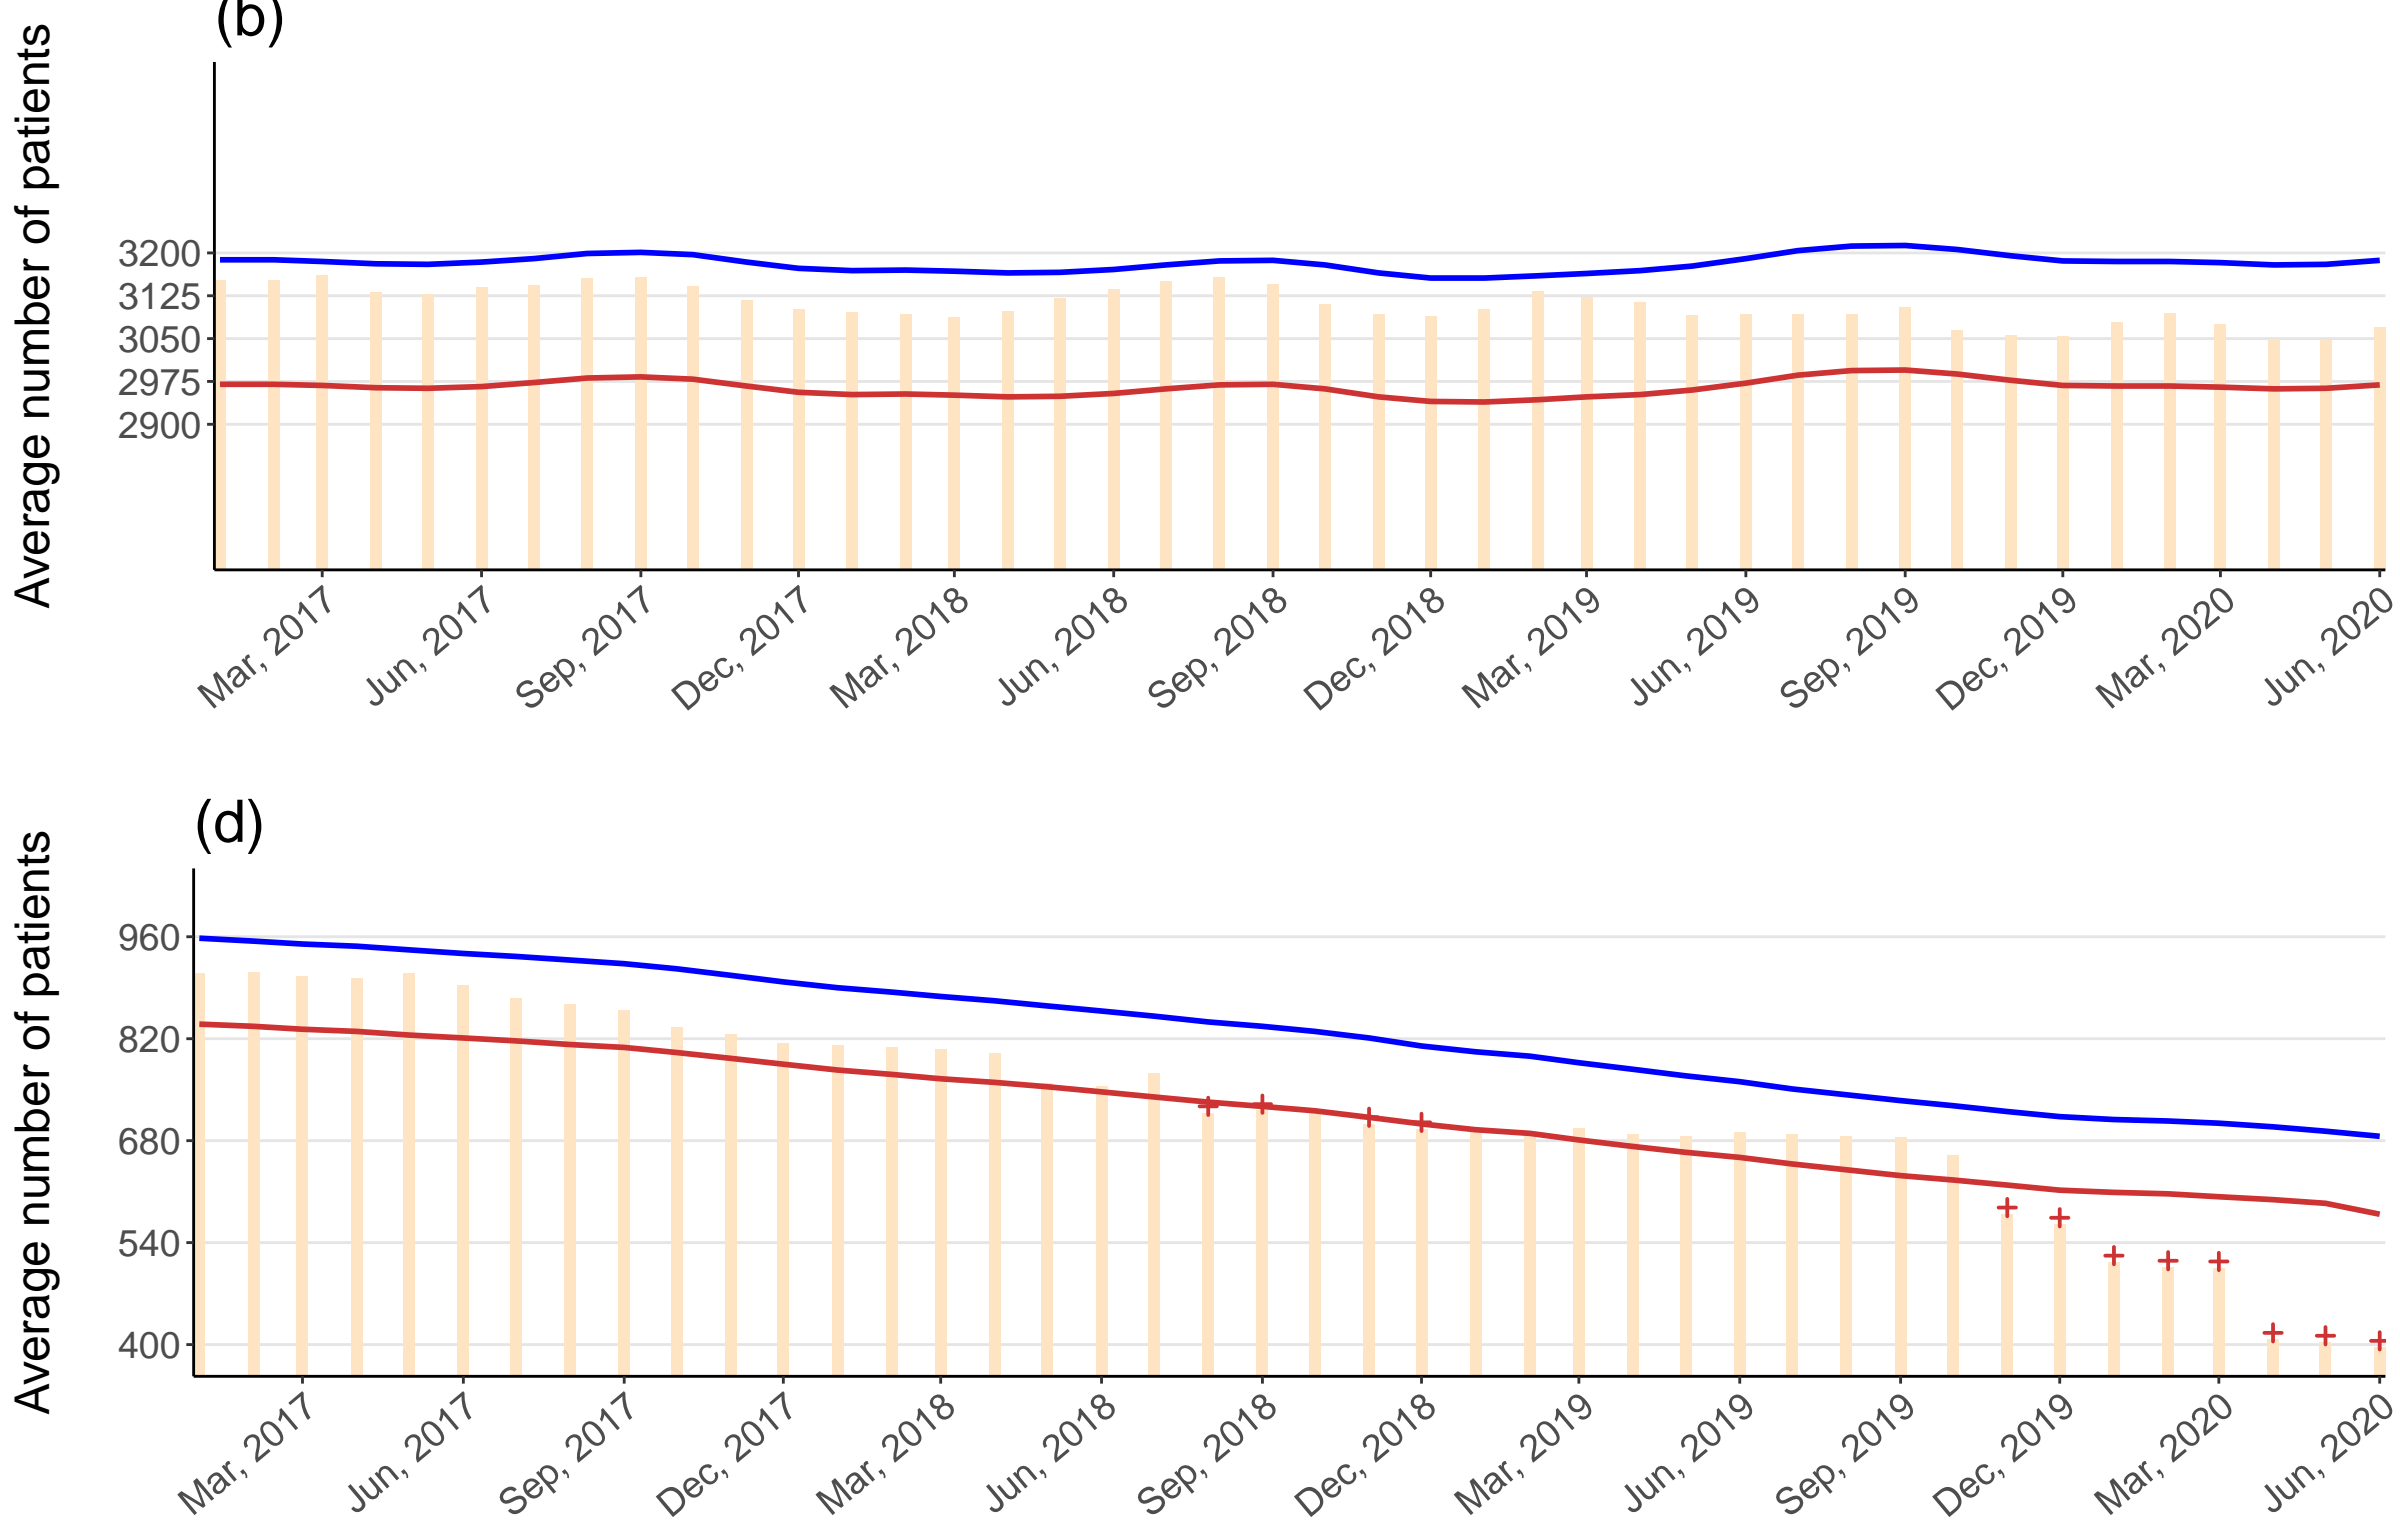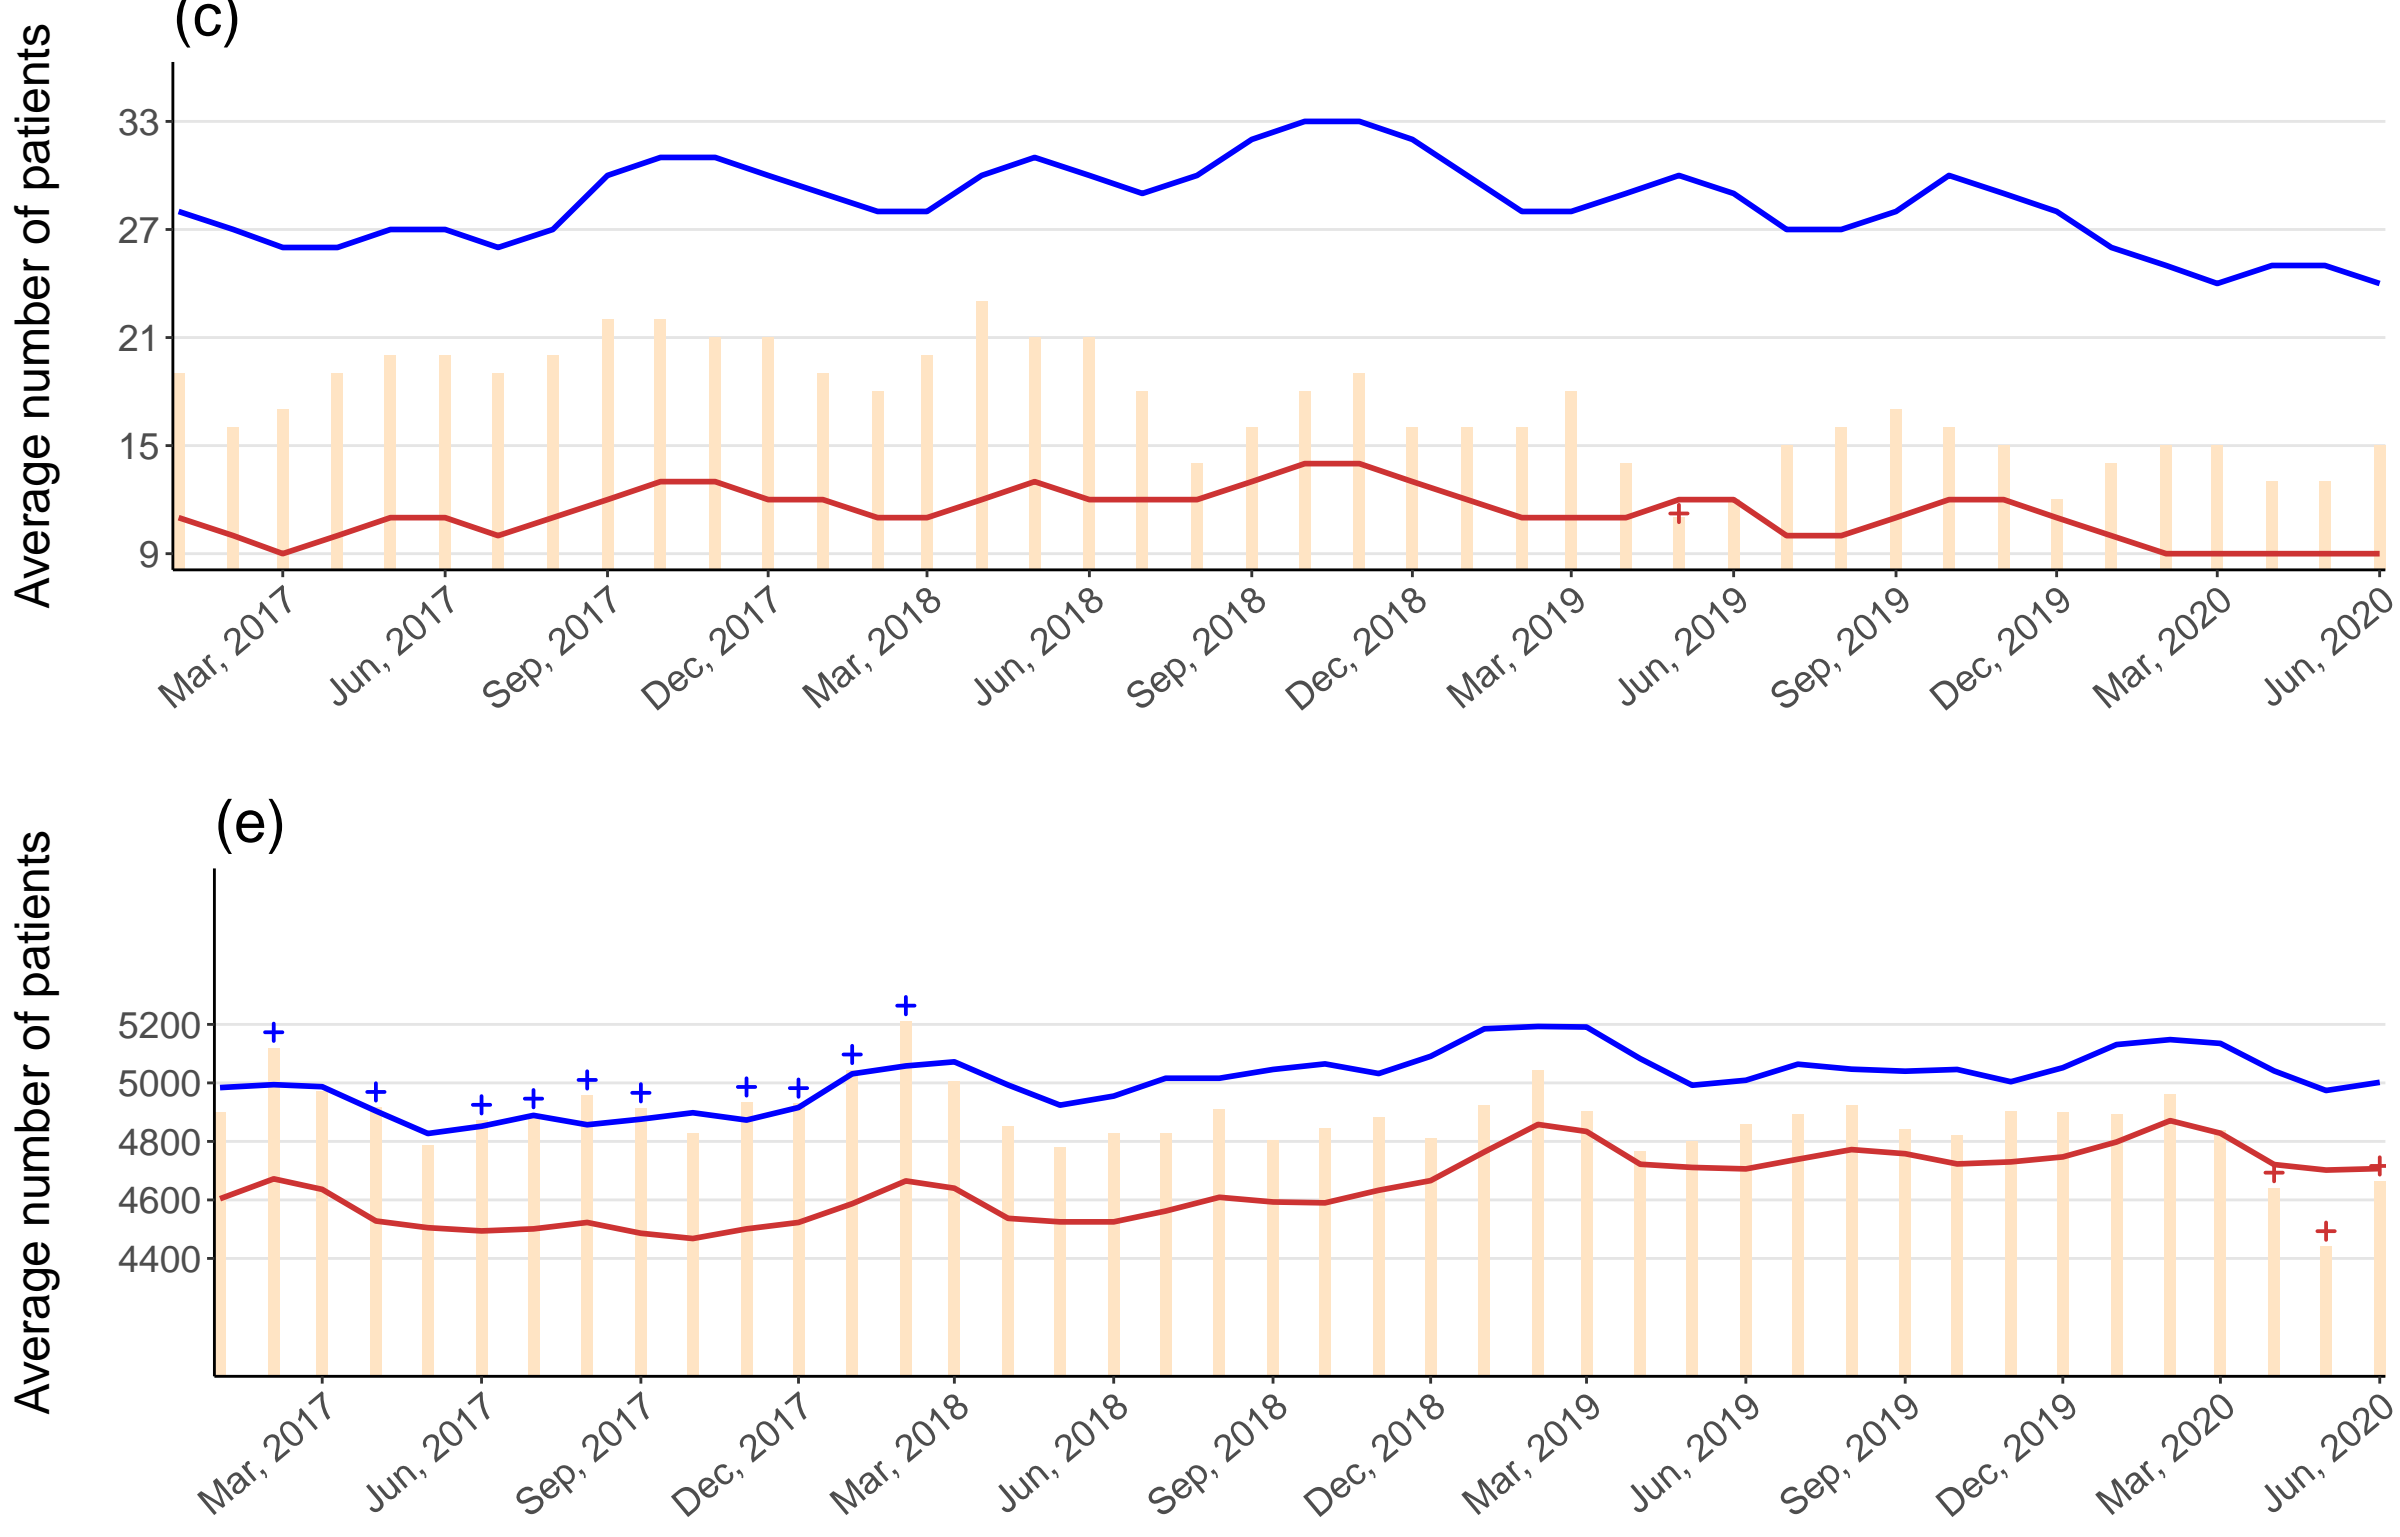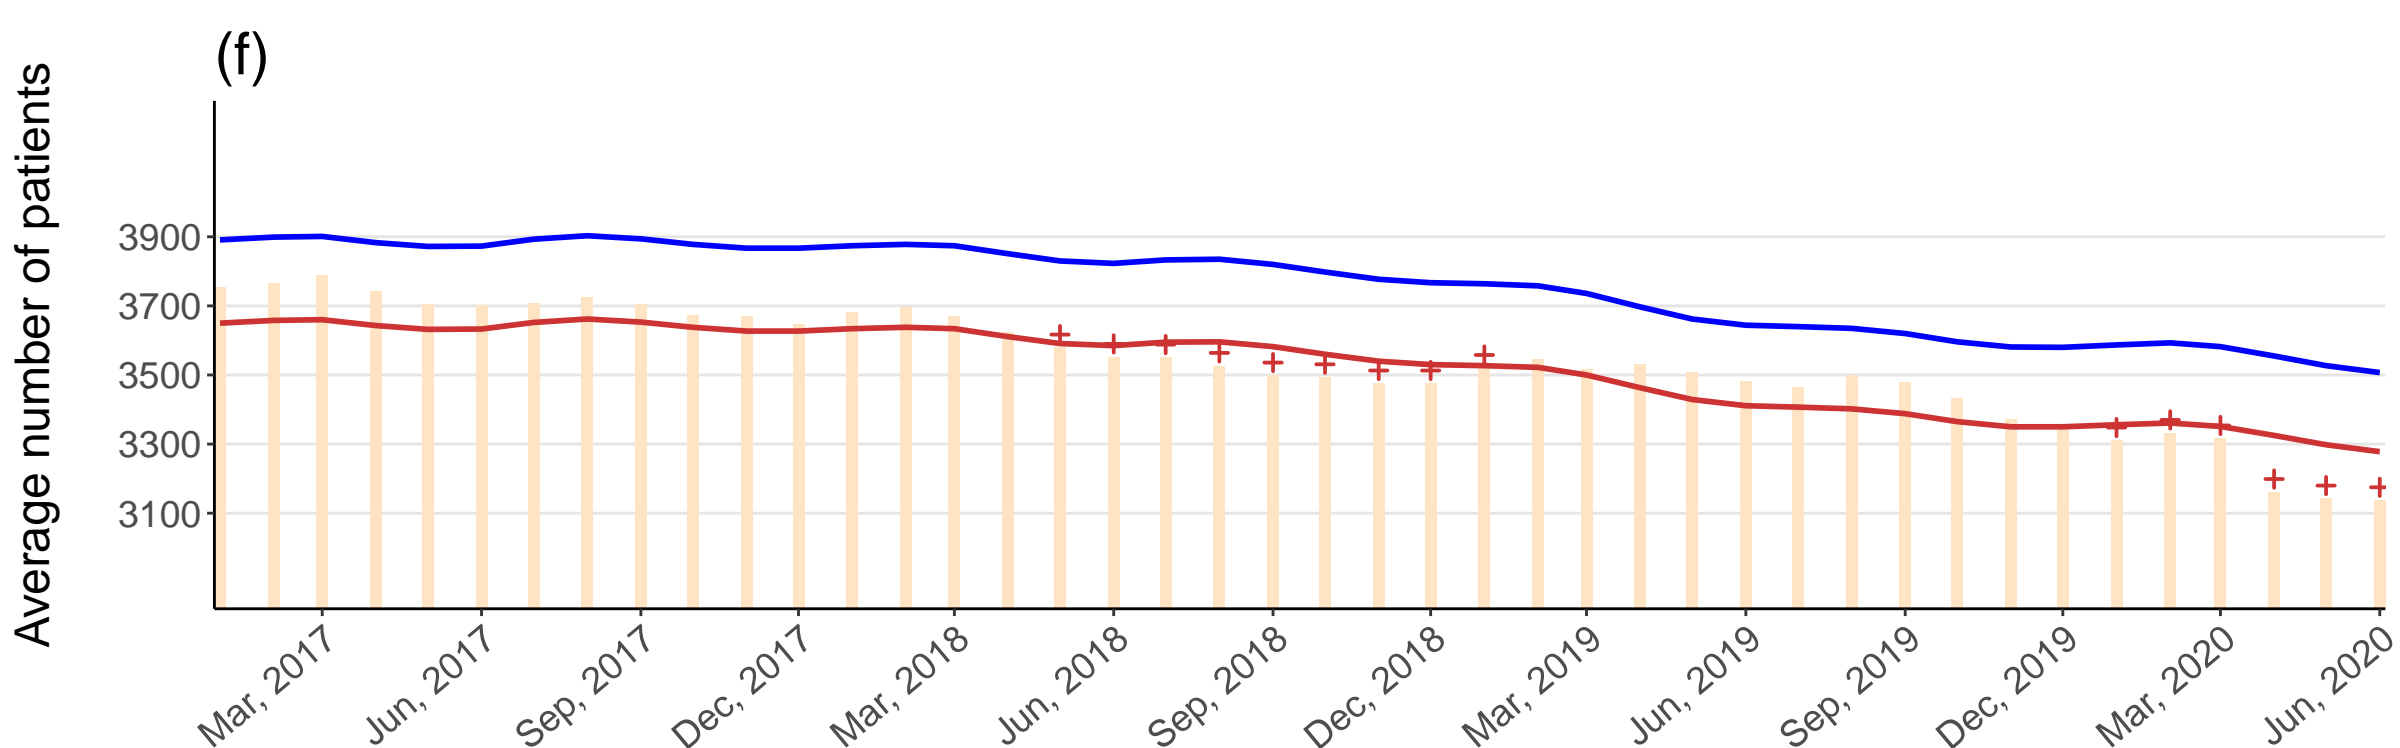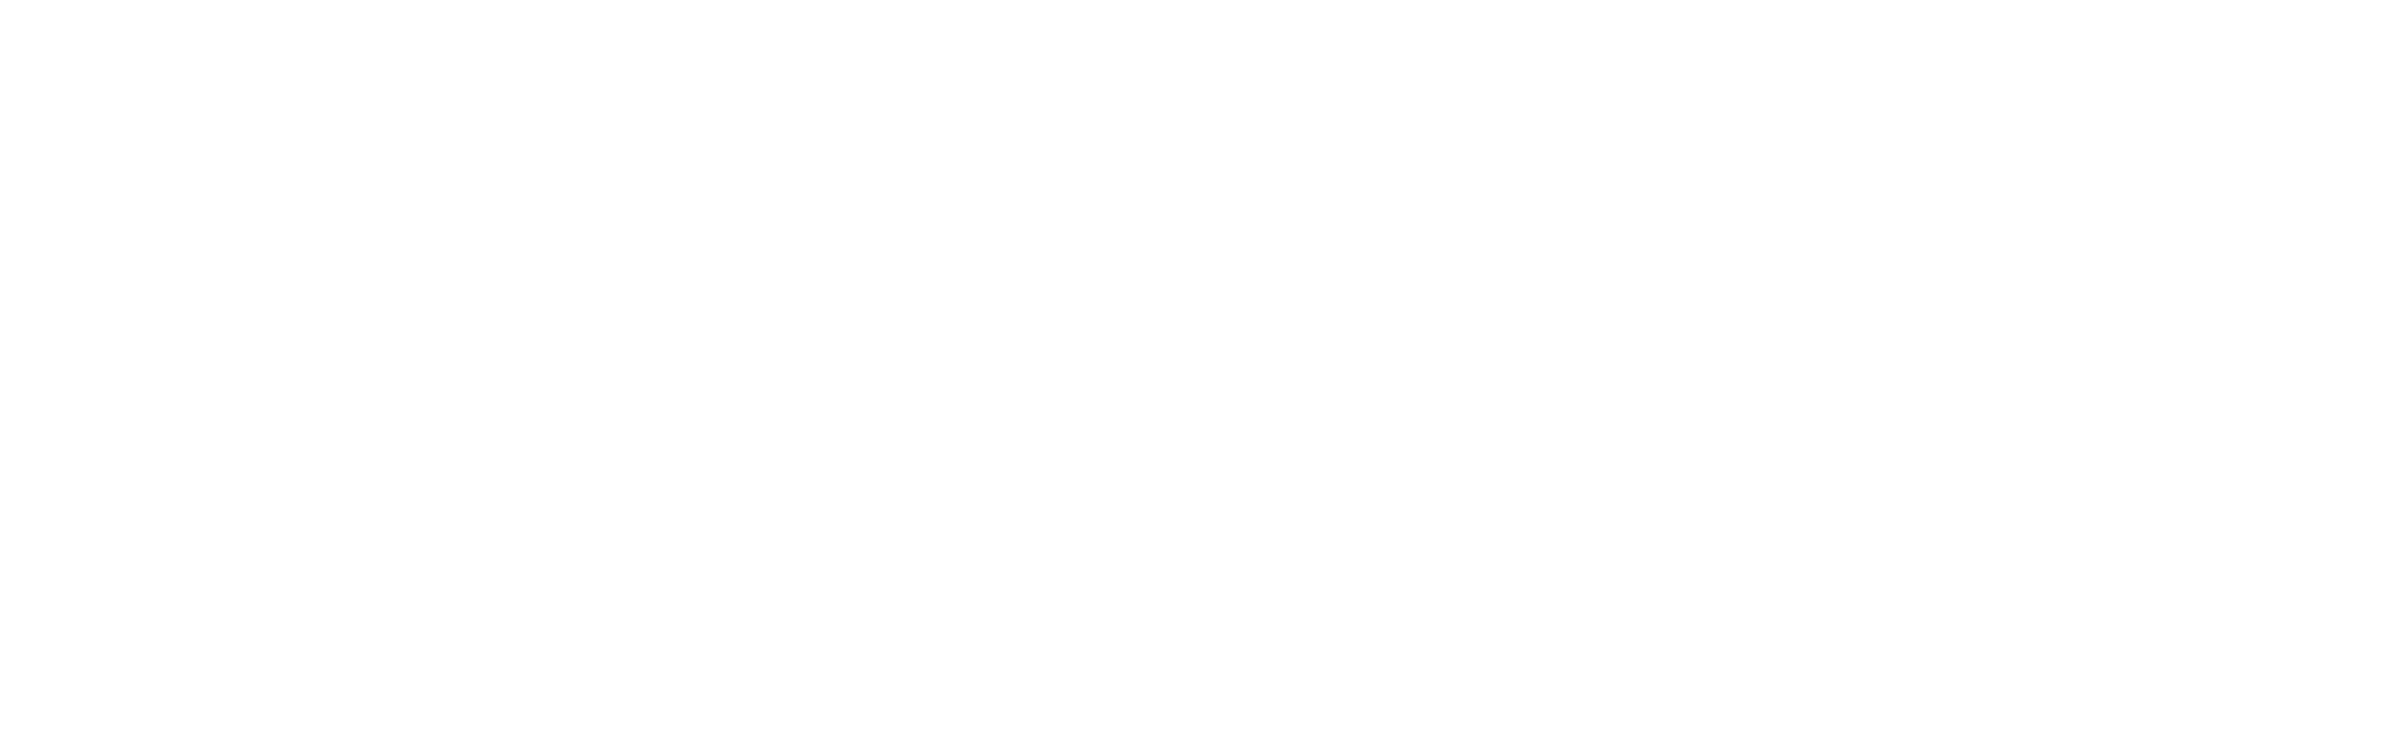



Kagawa

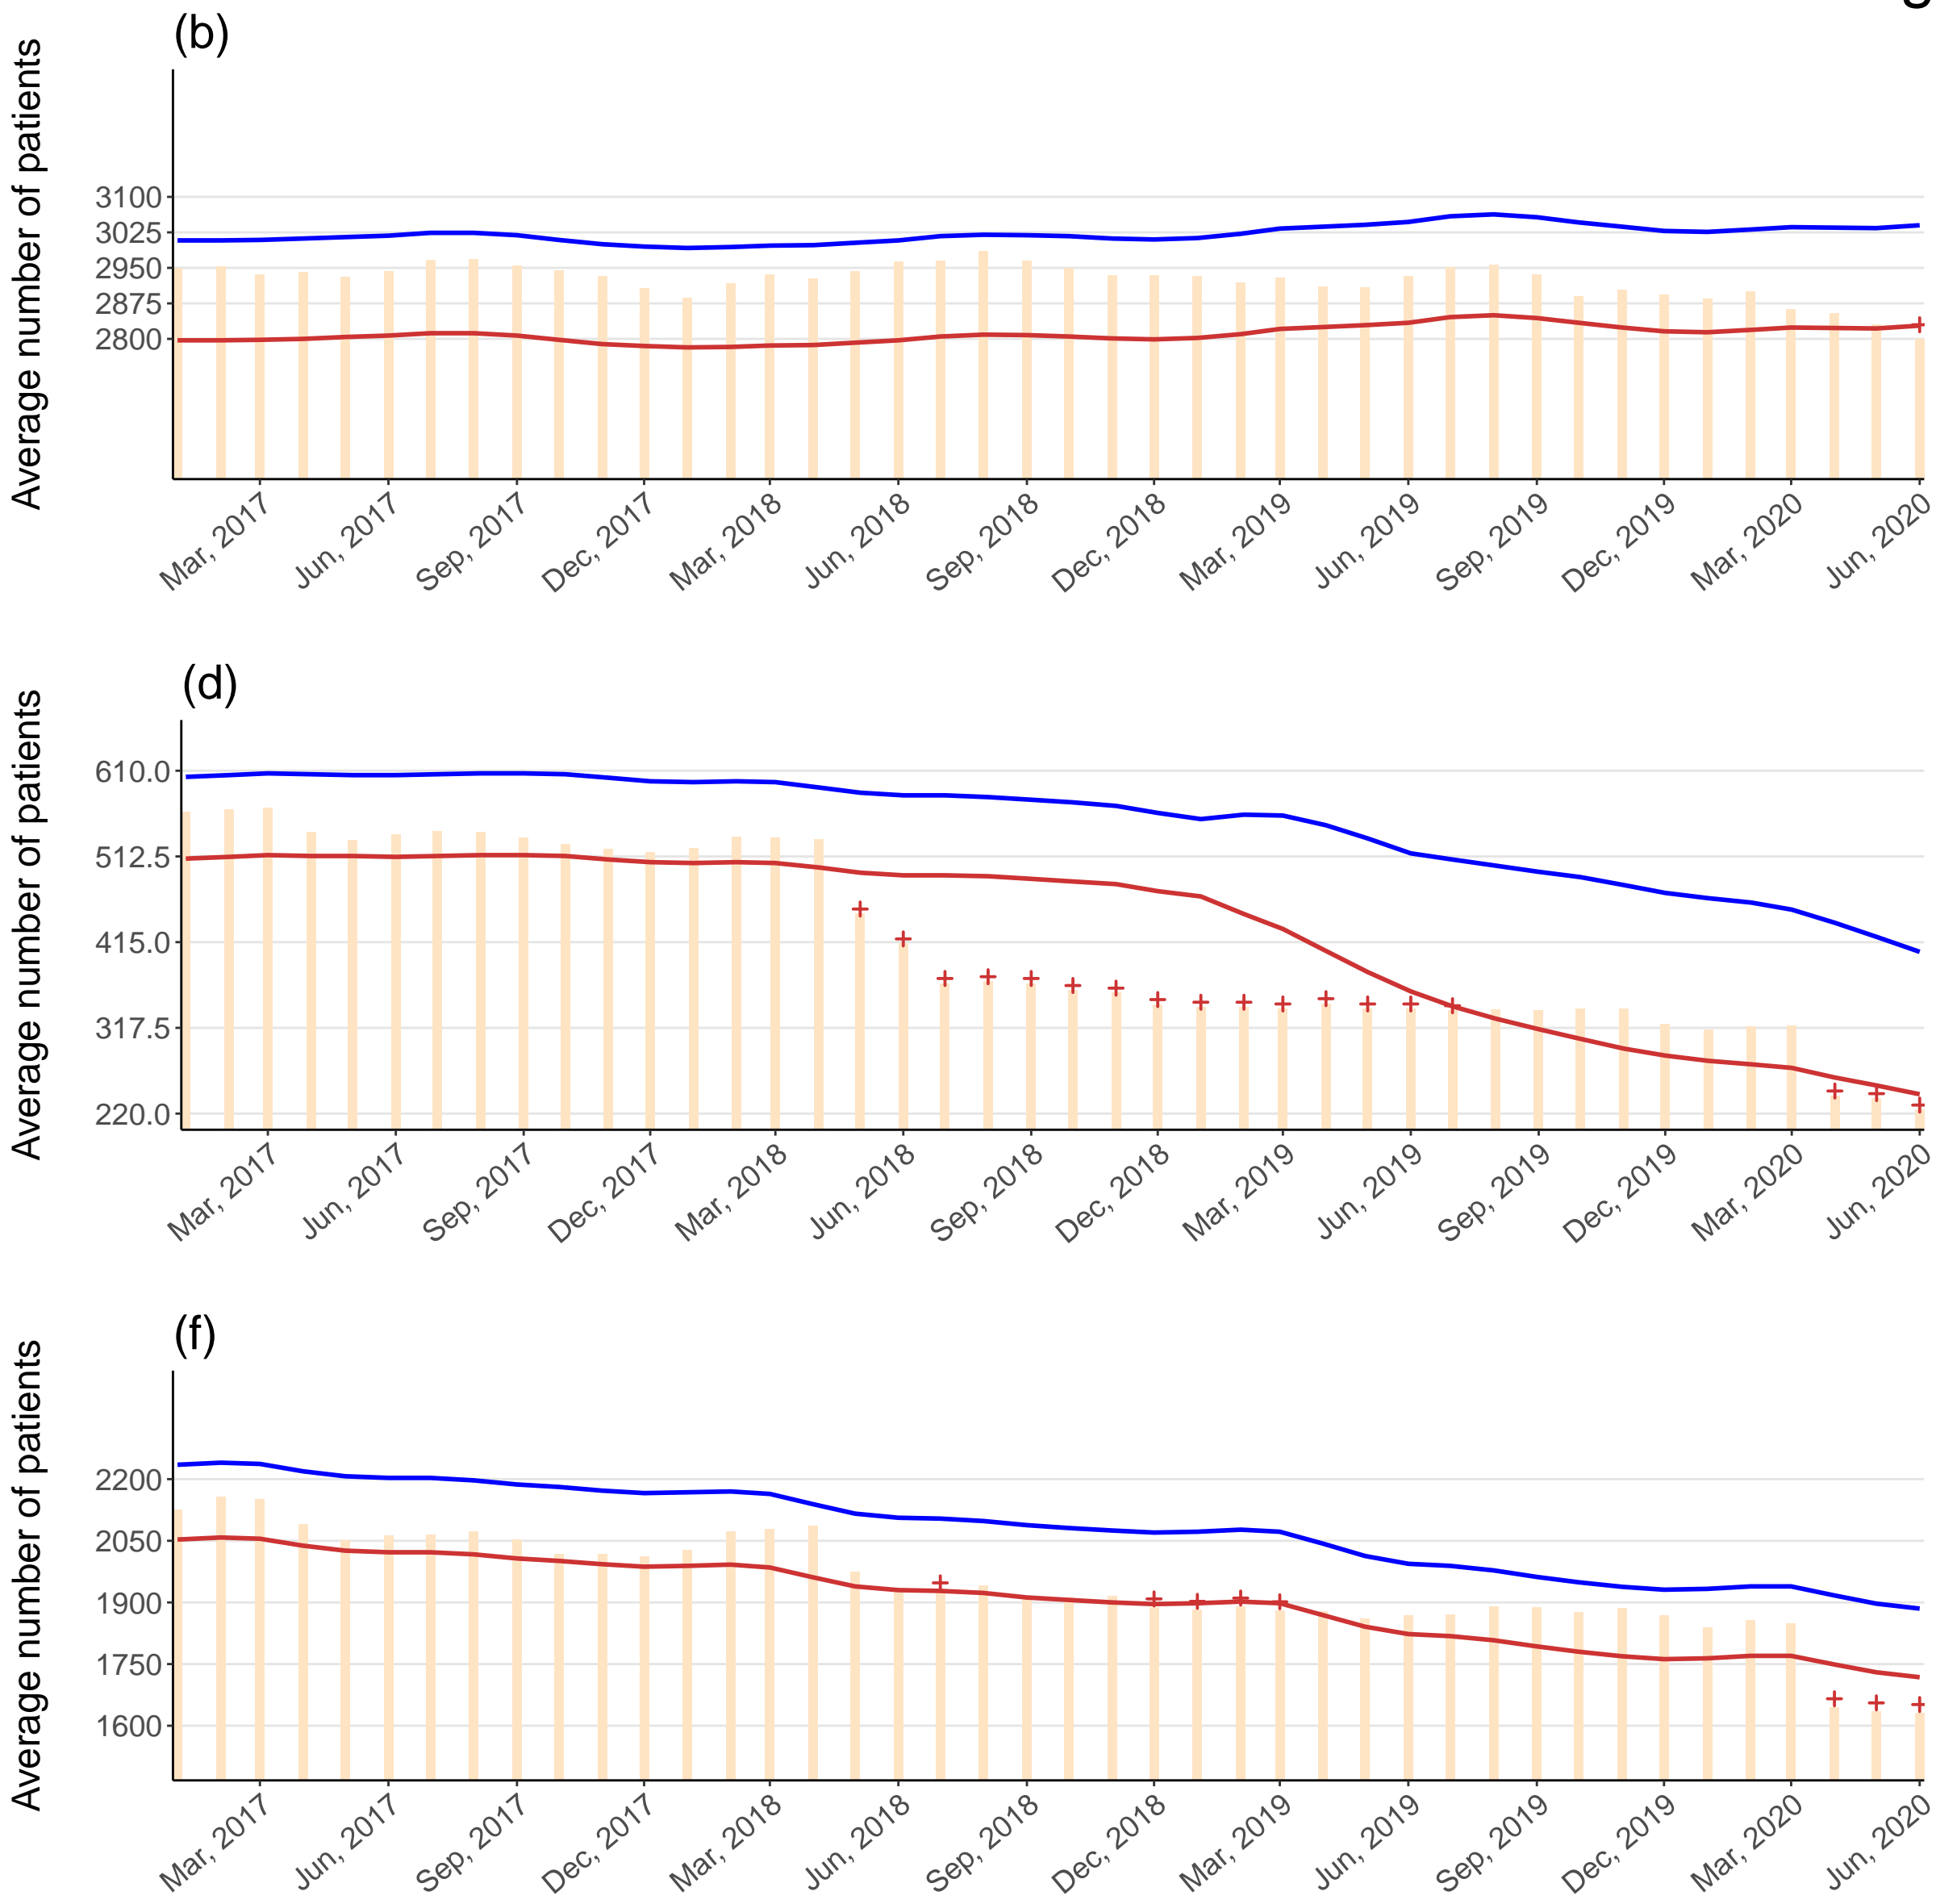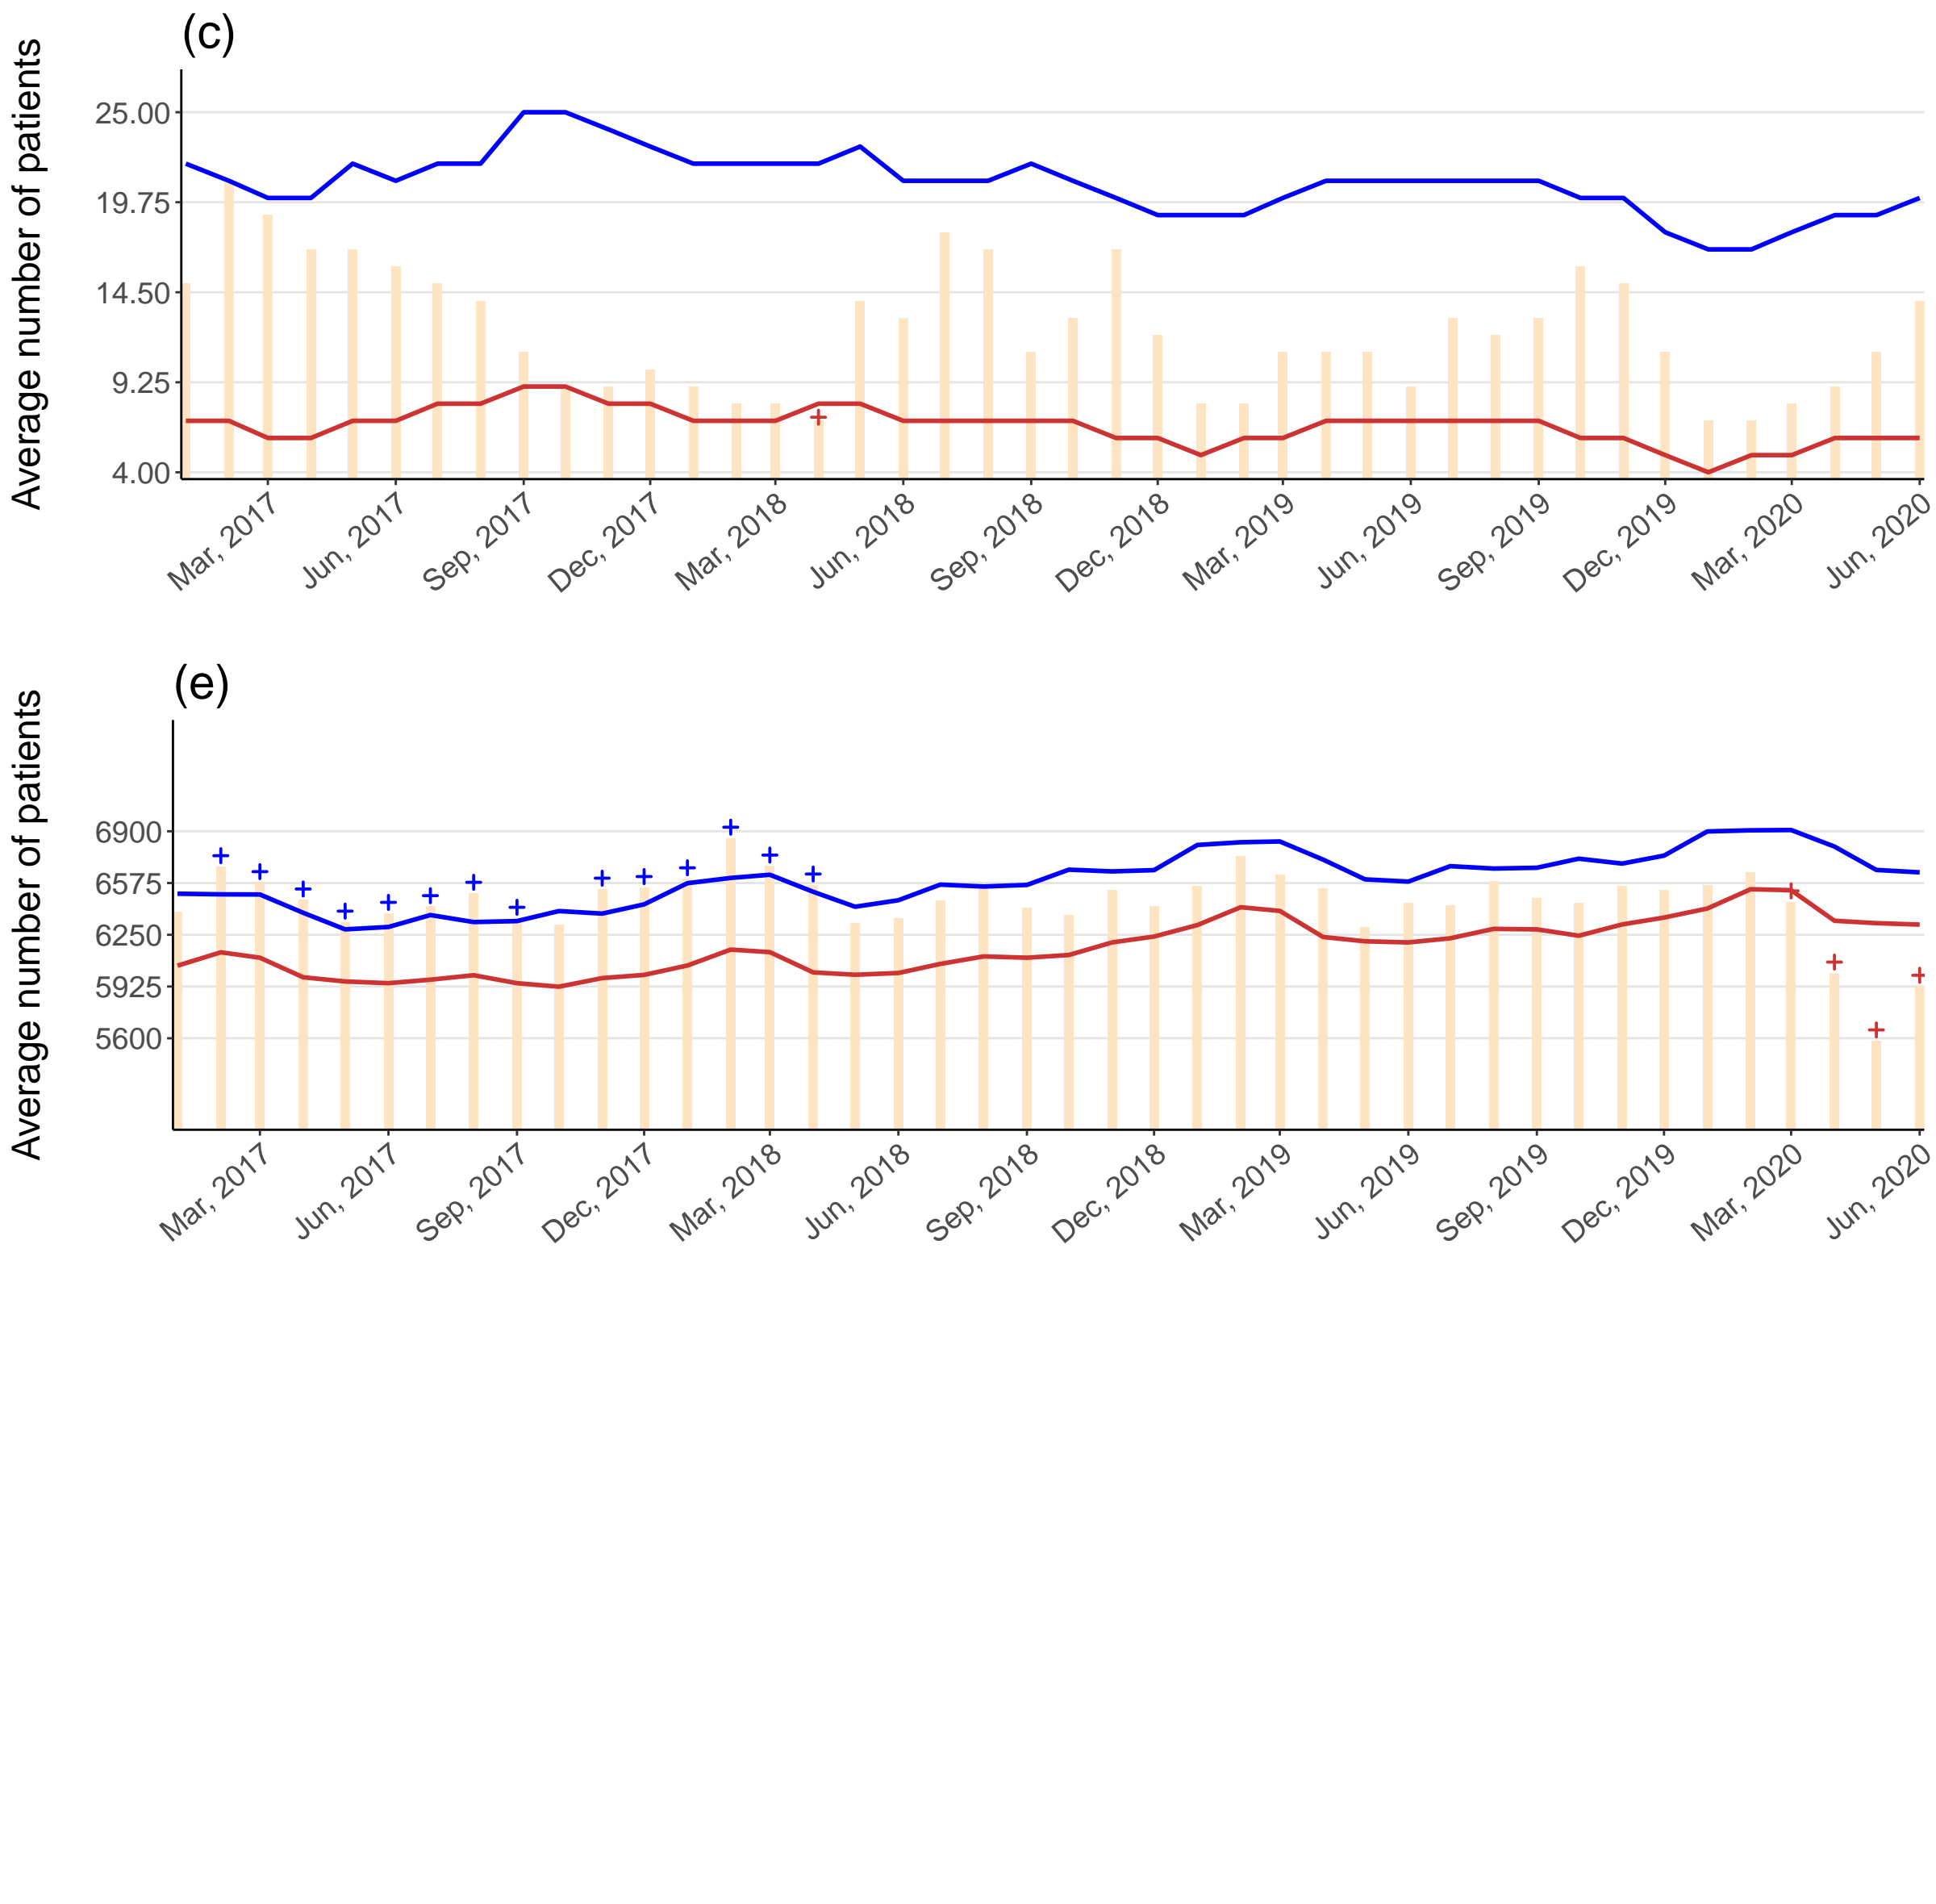

Ehime

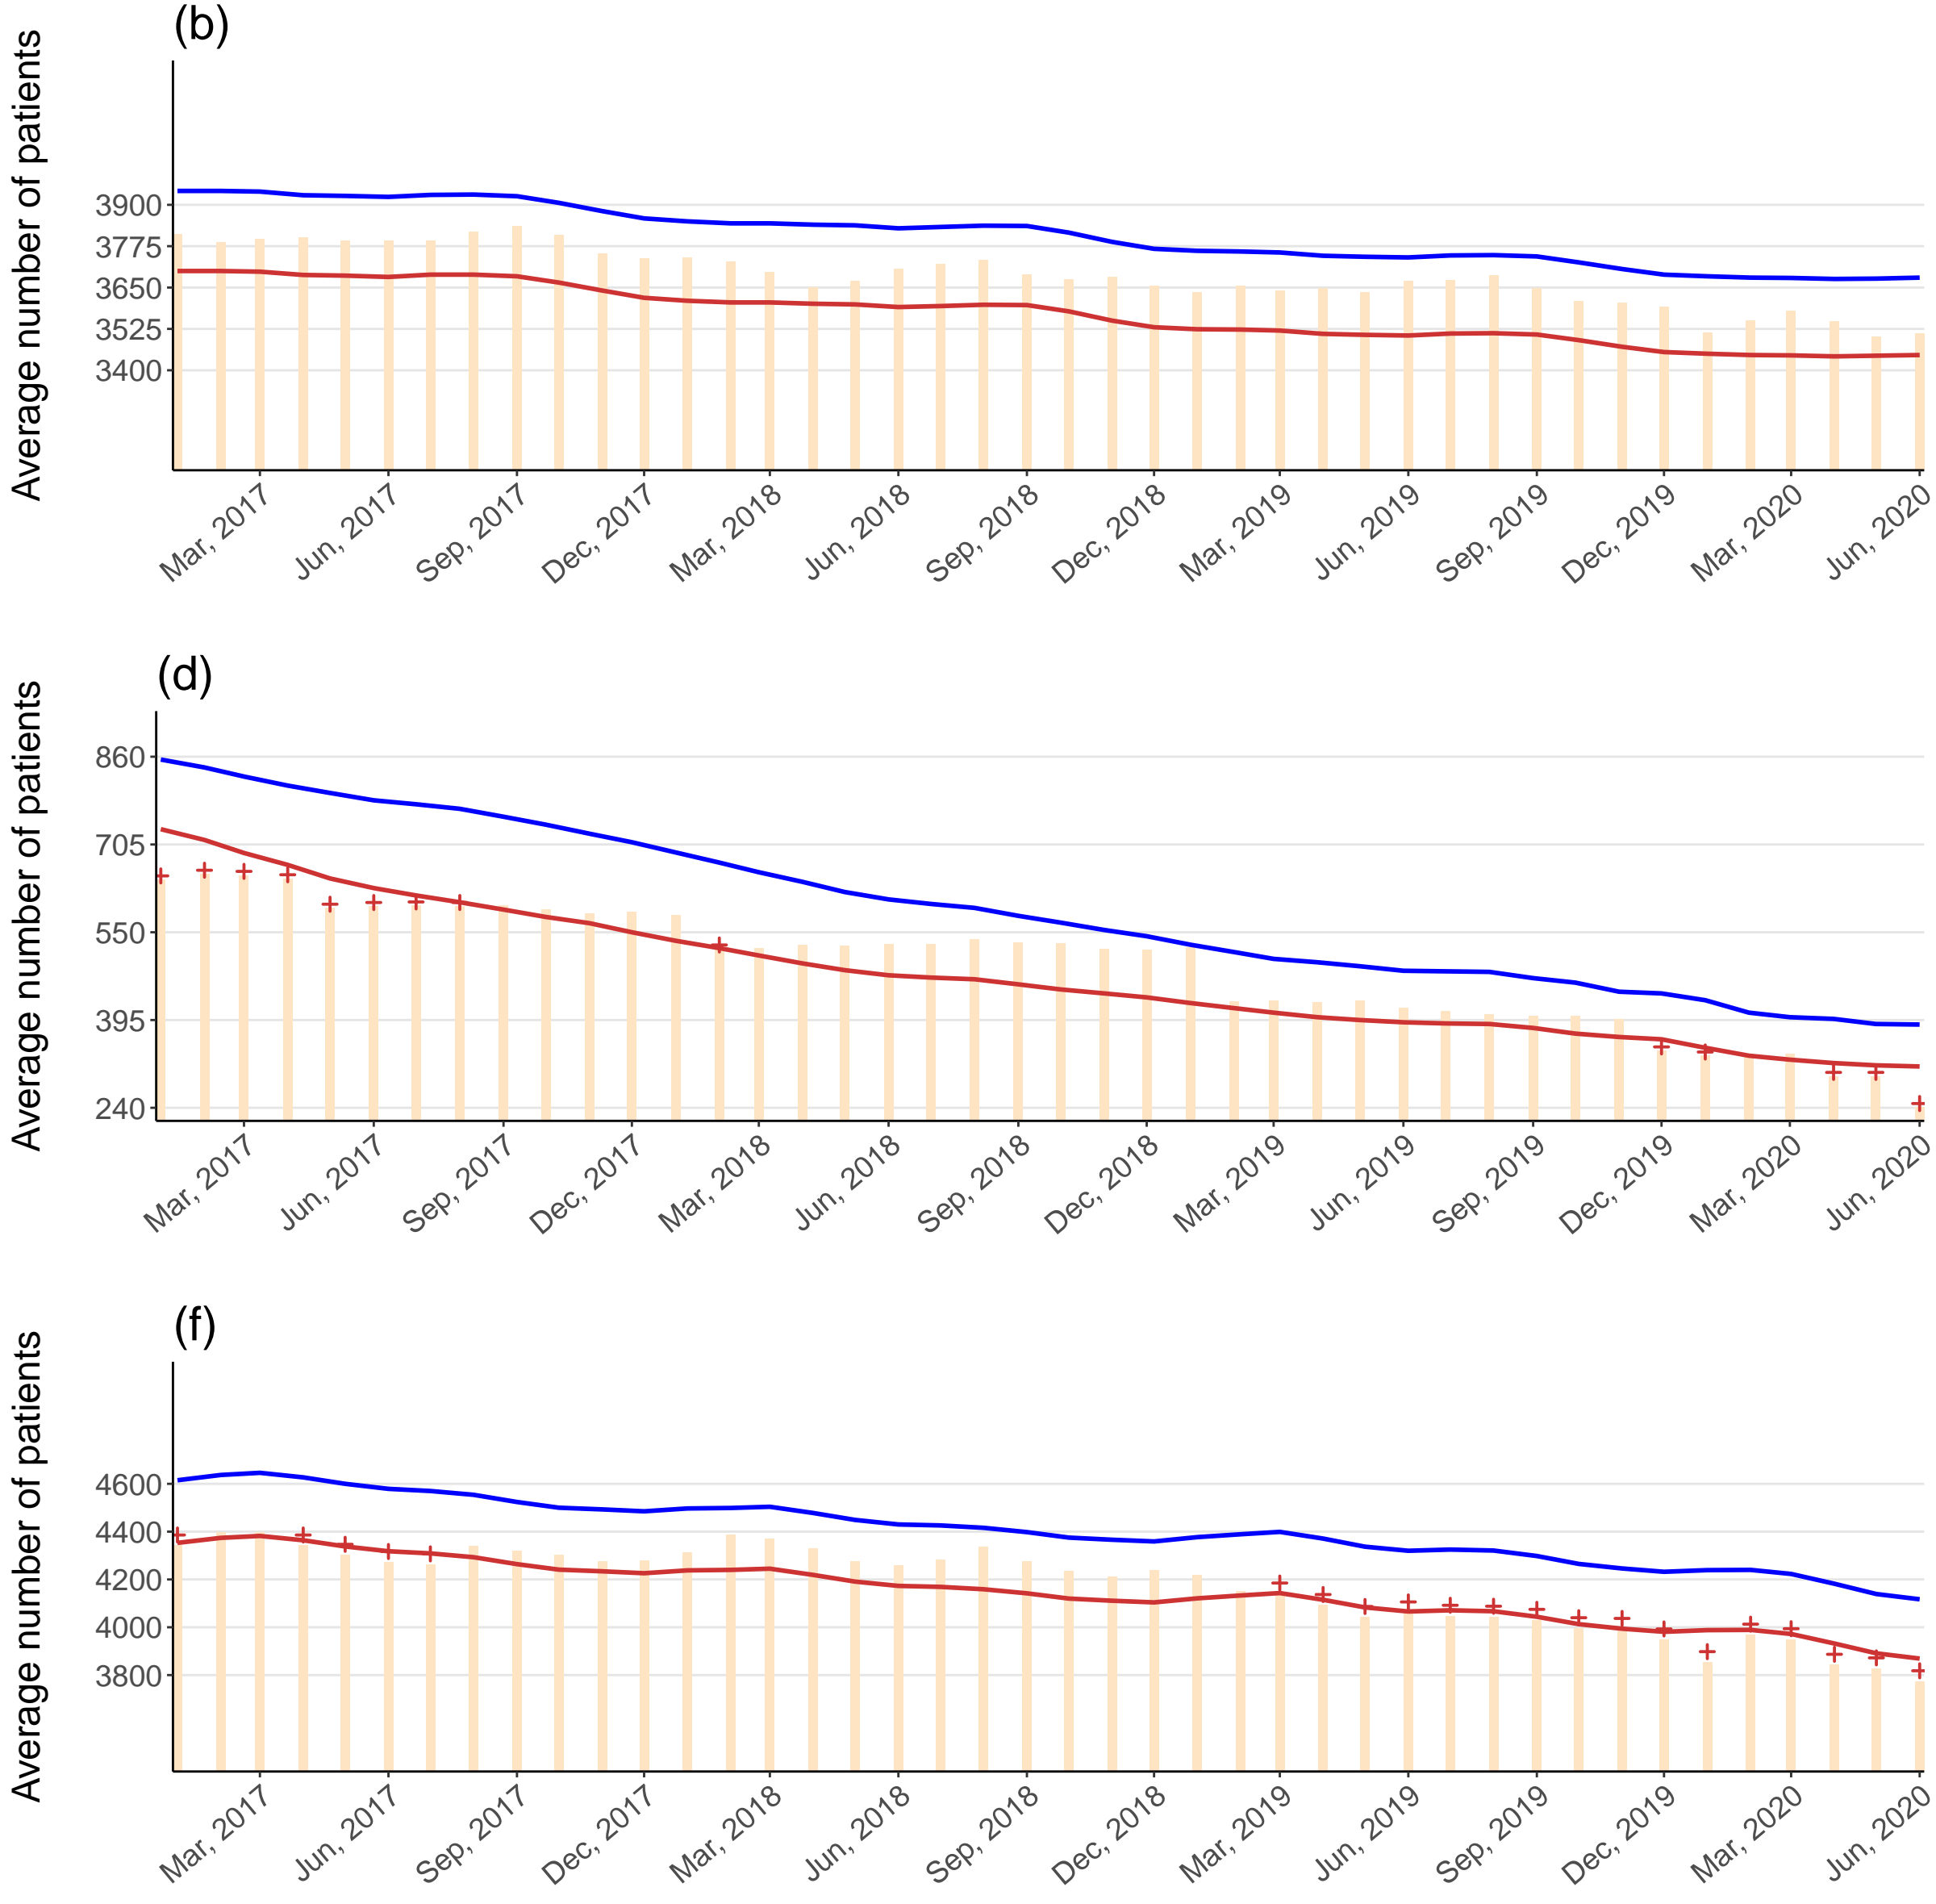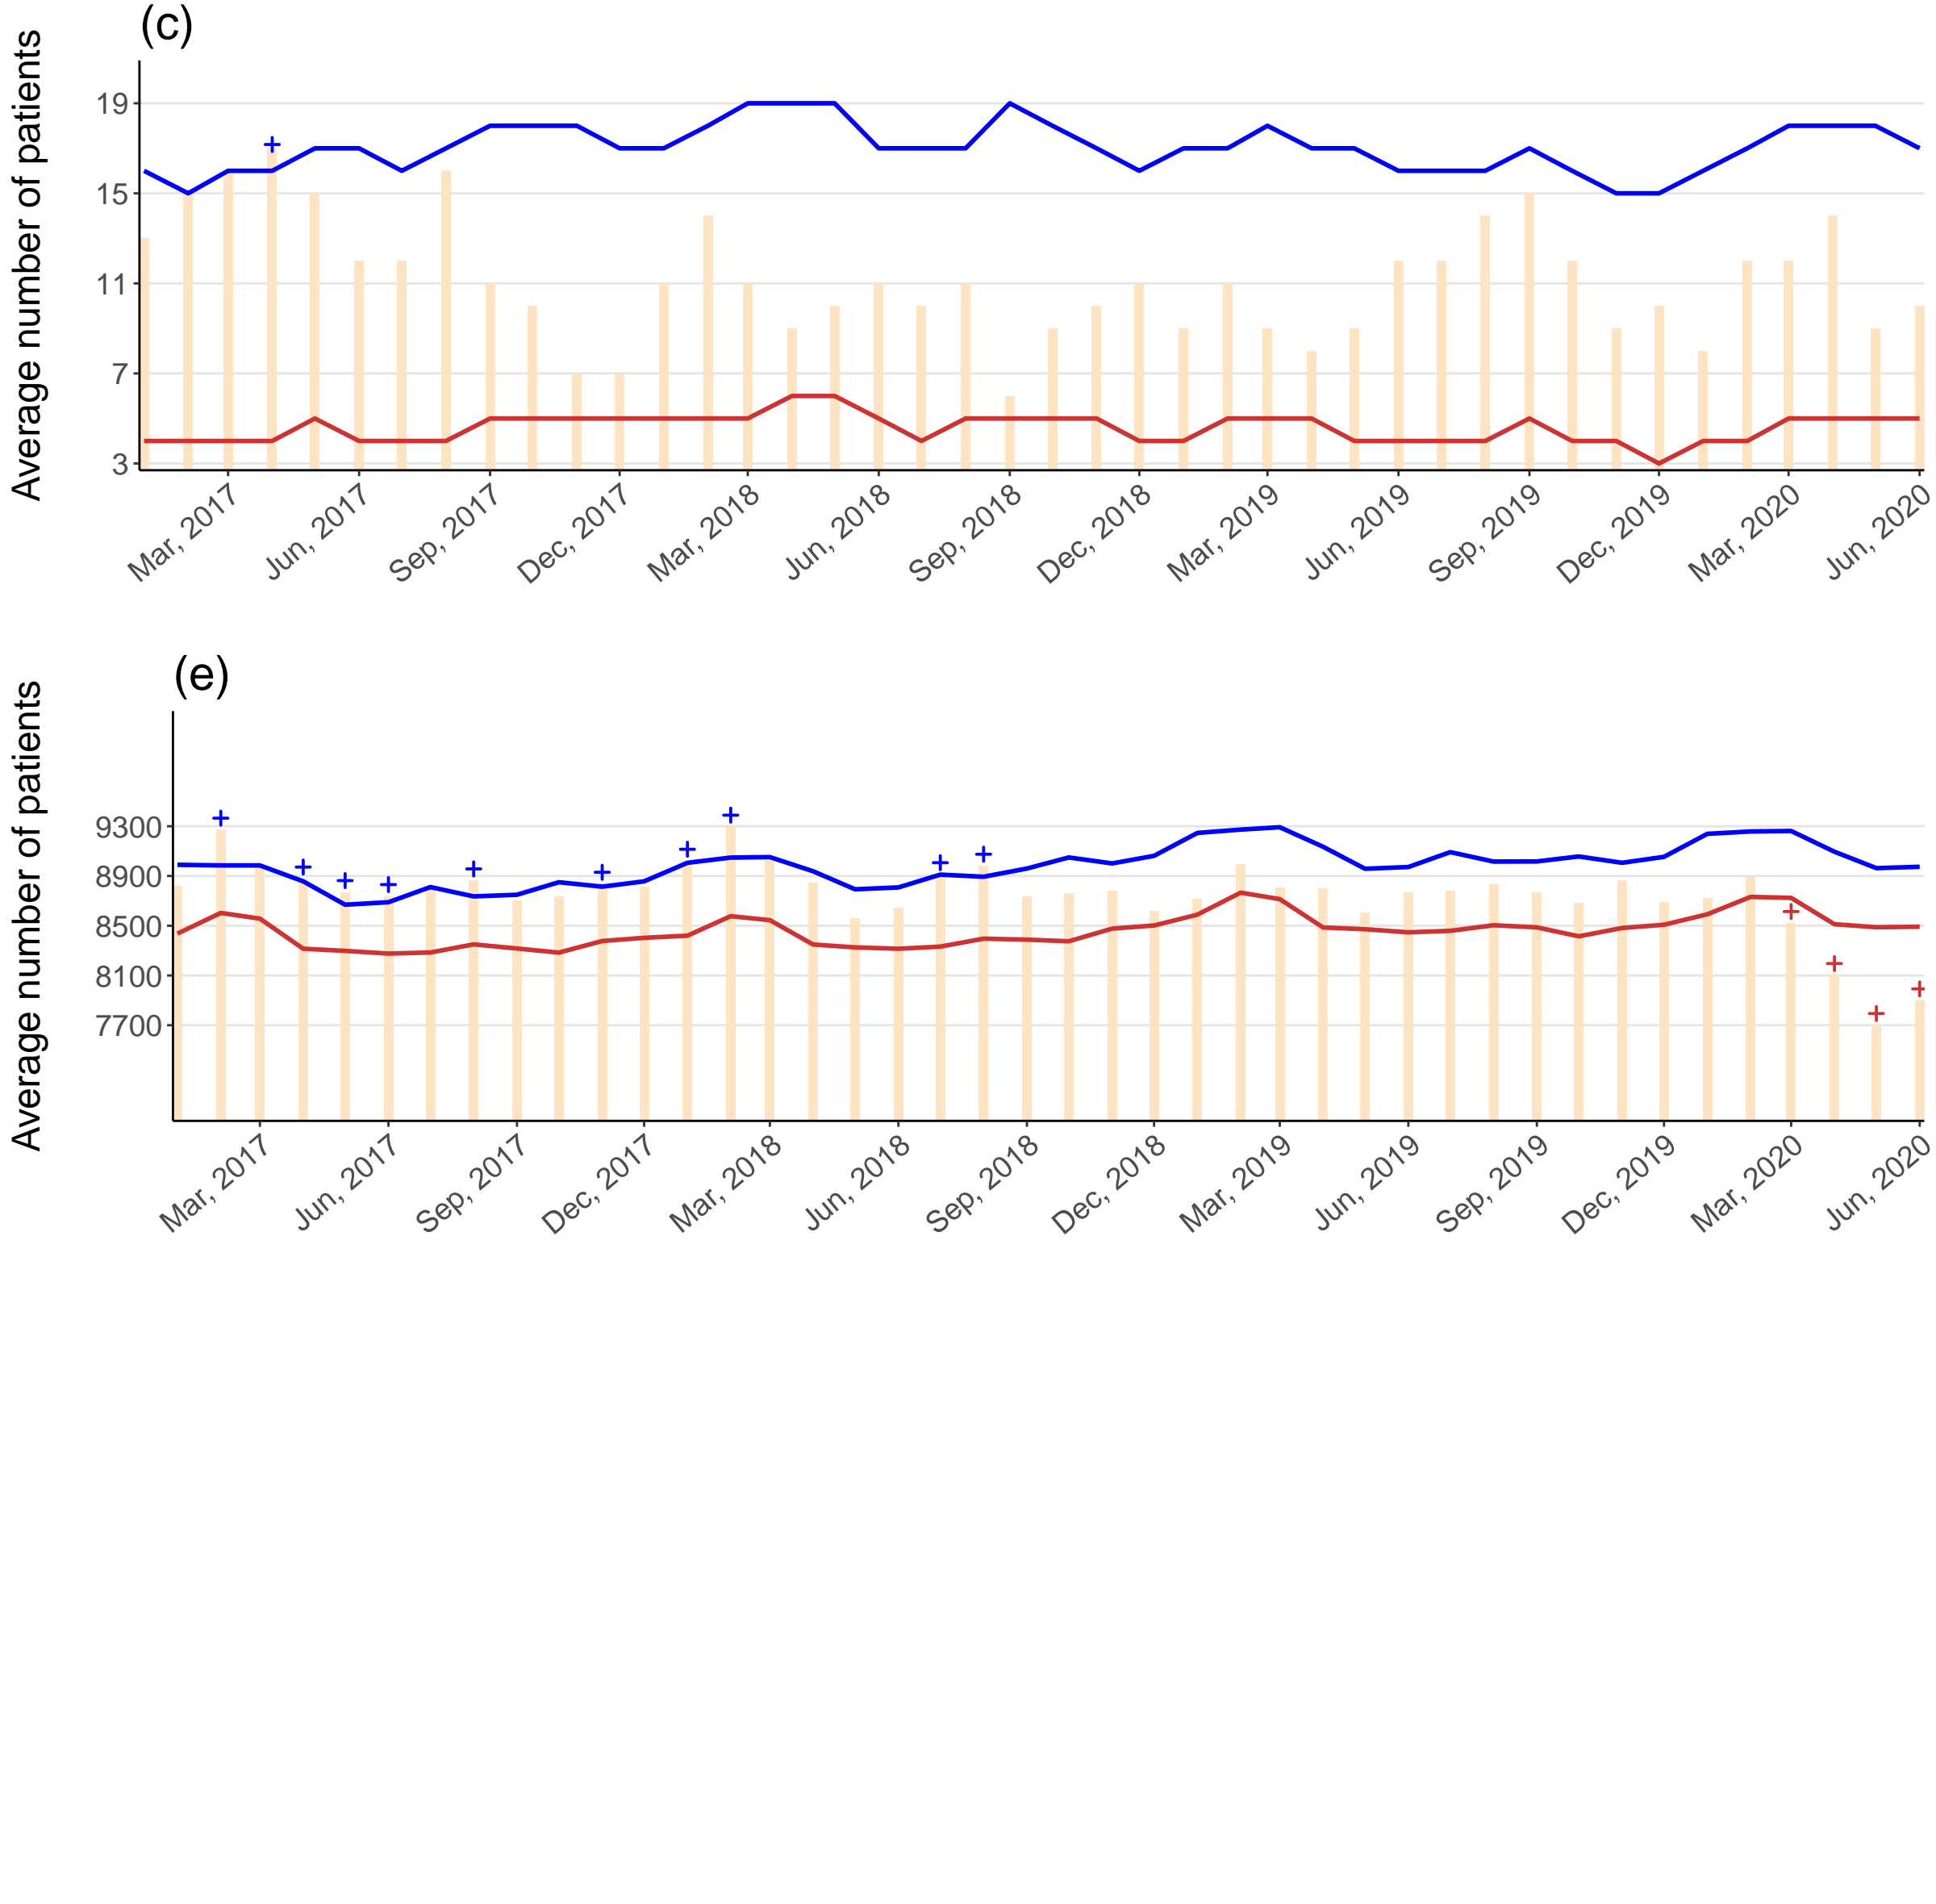

Kochi

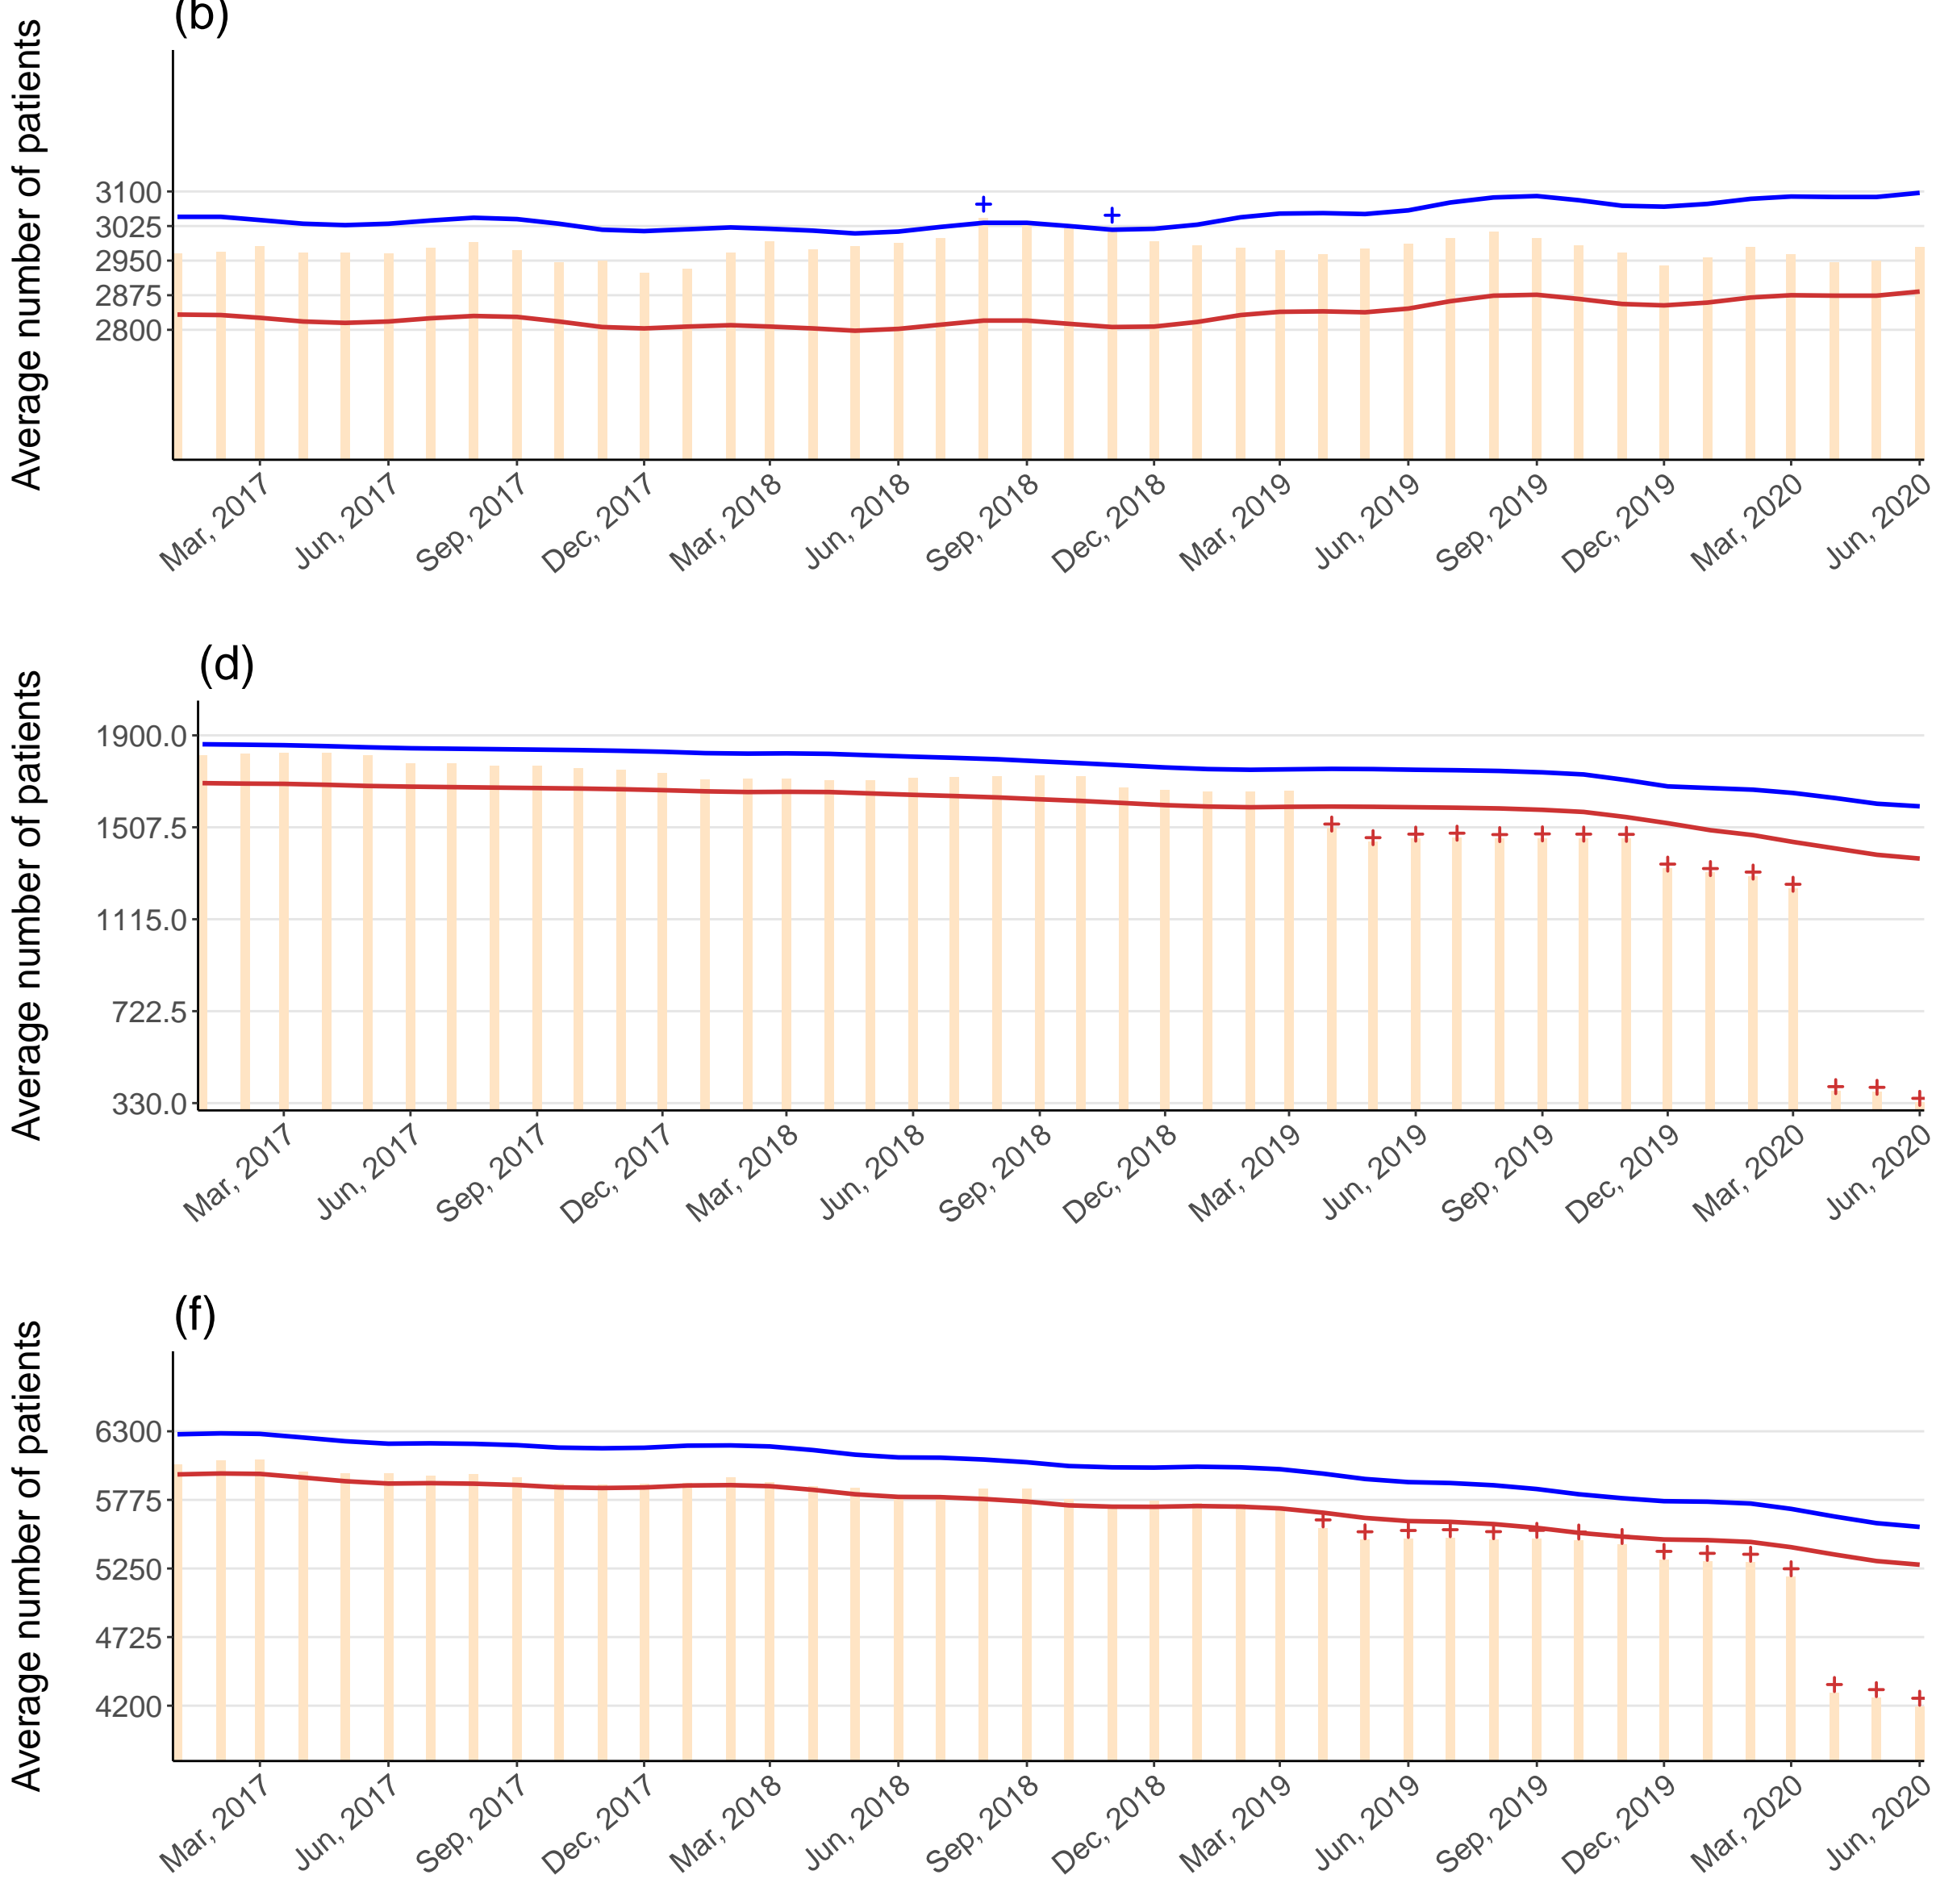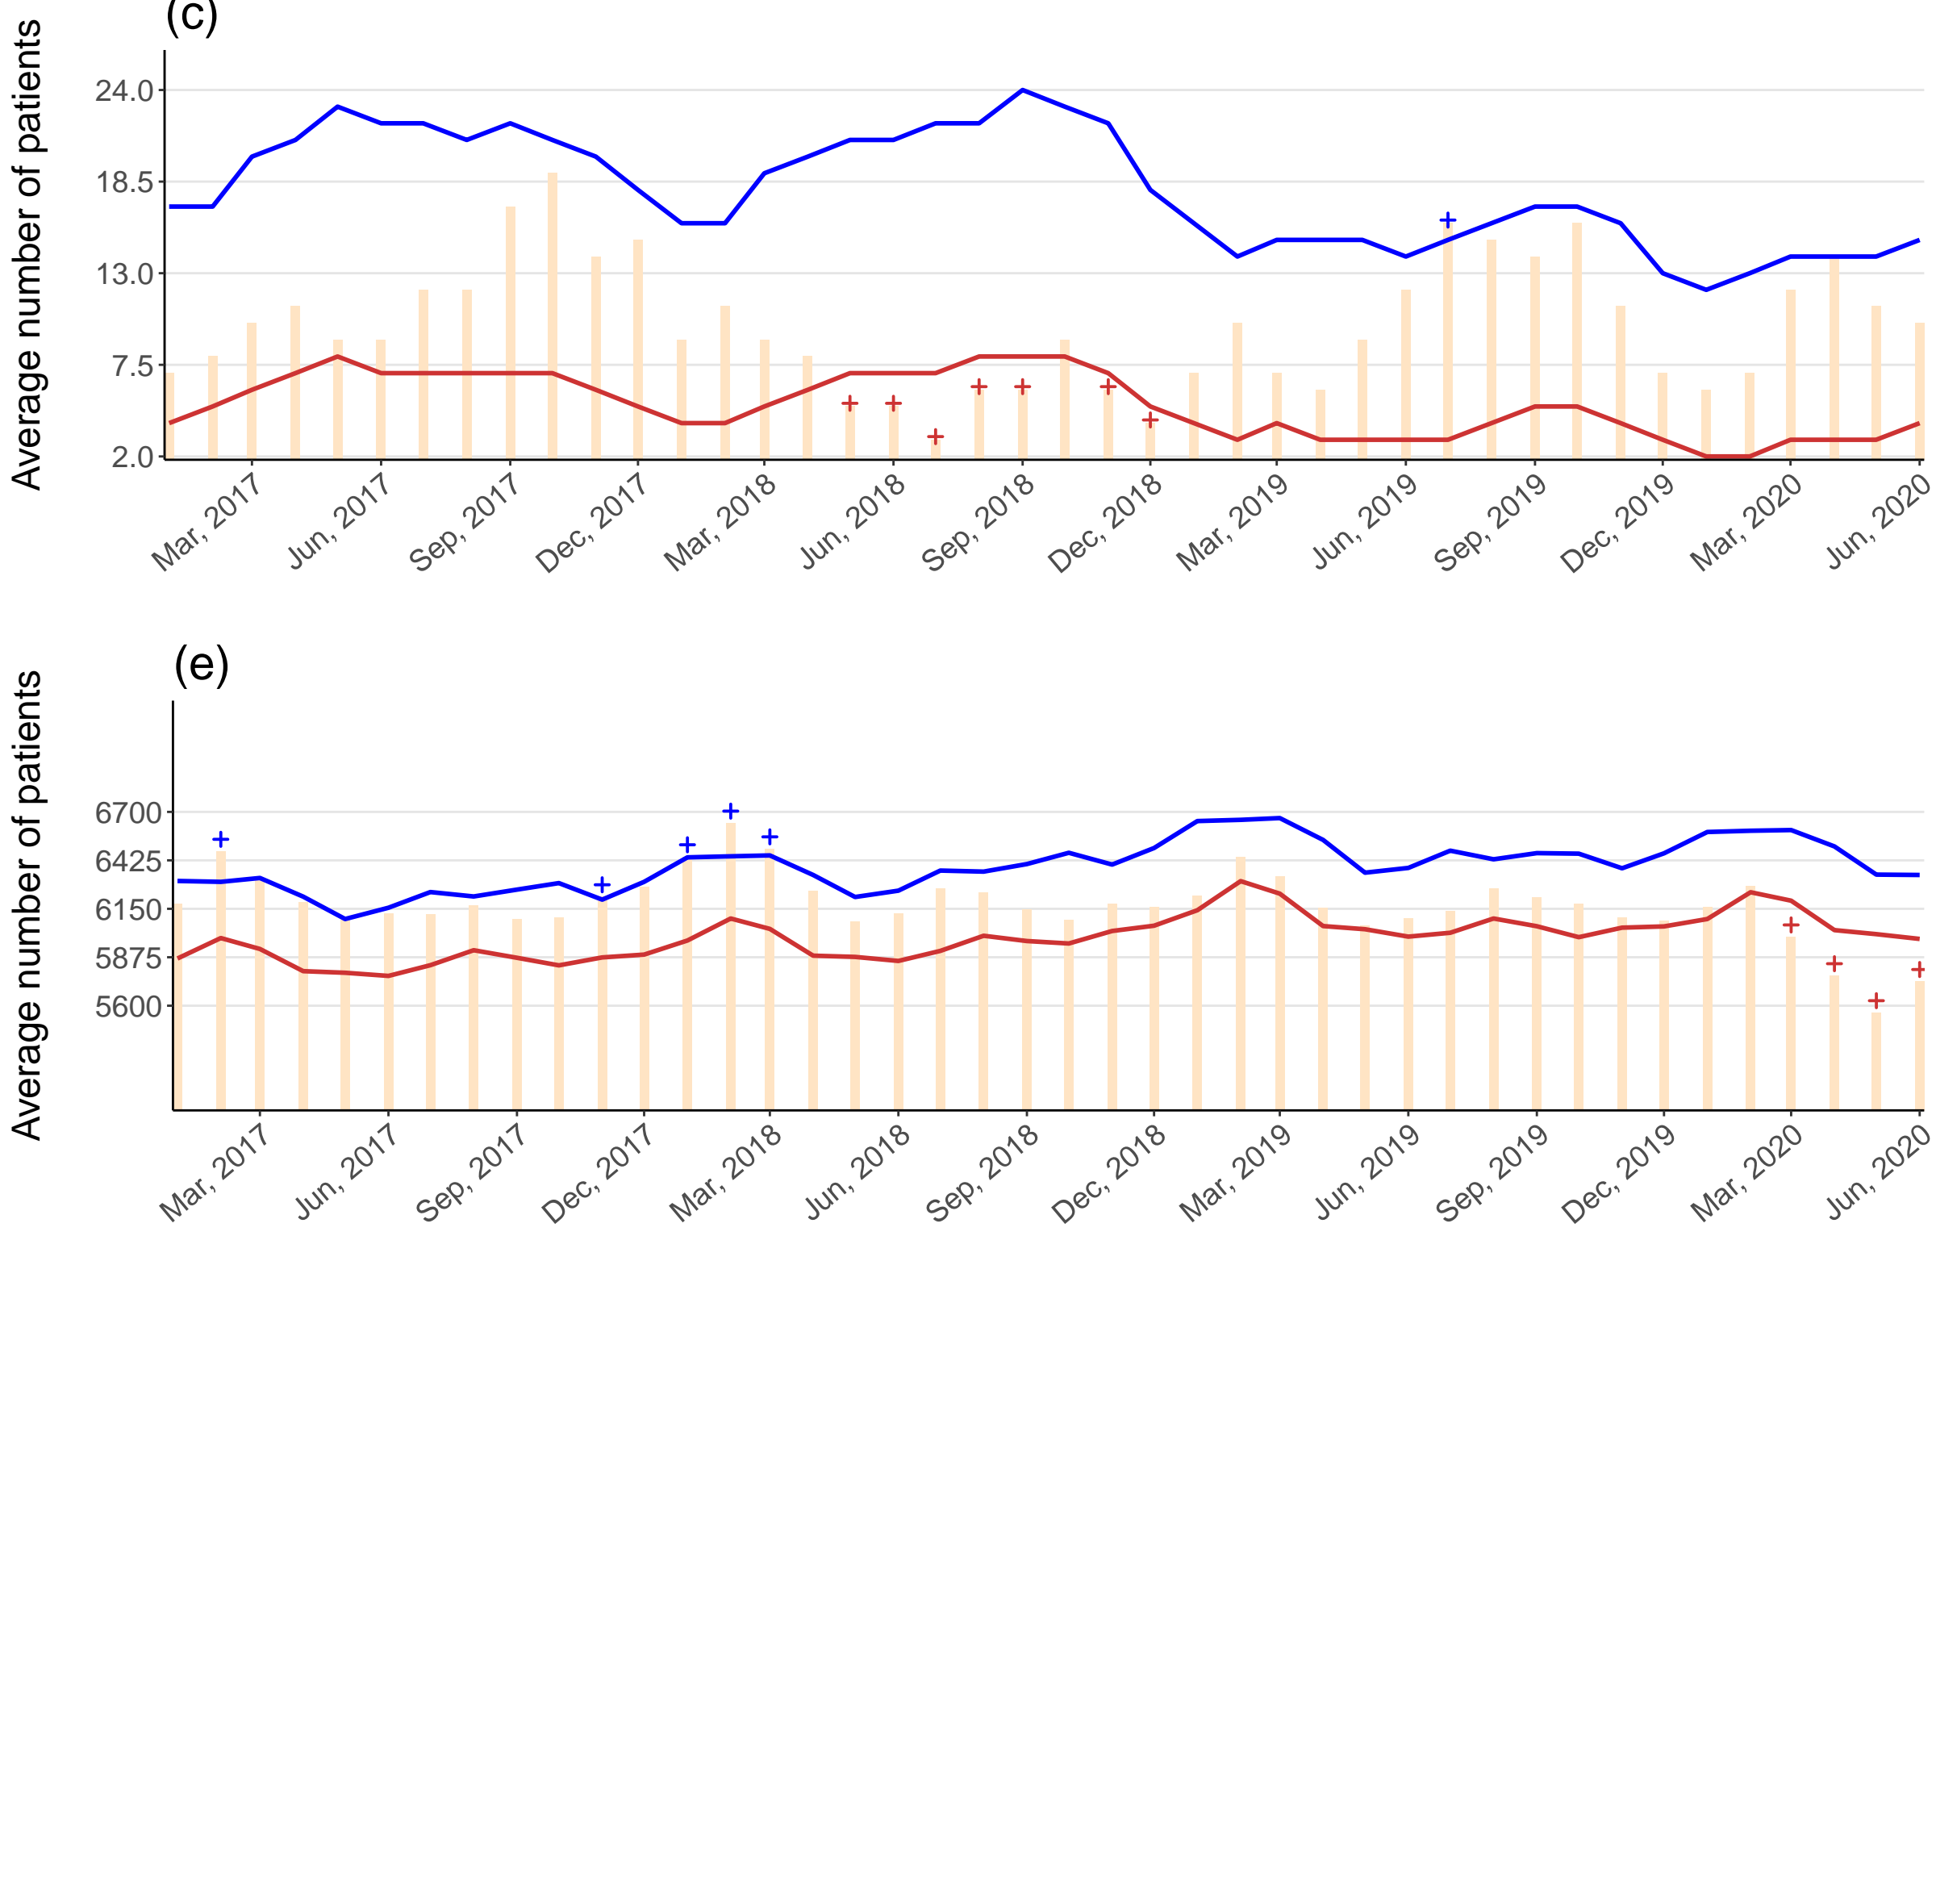



# Fukuoka

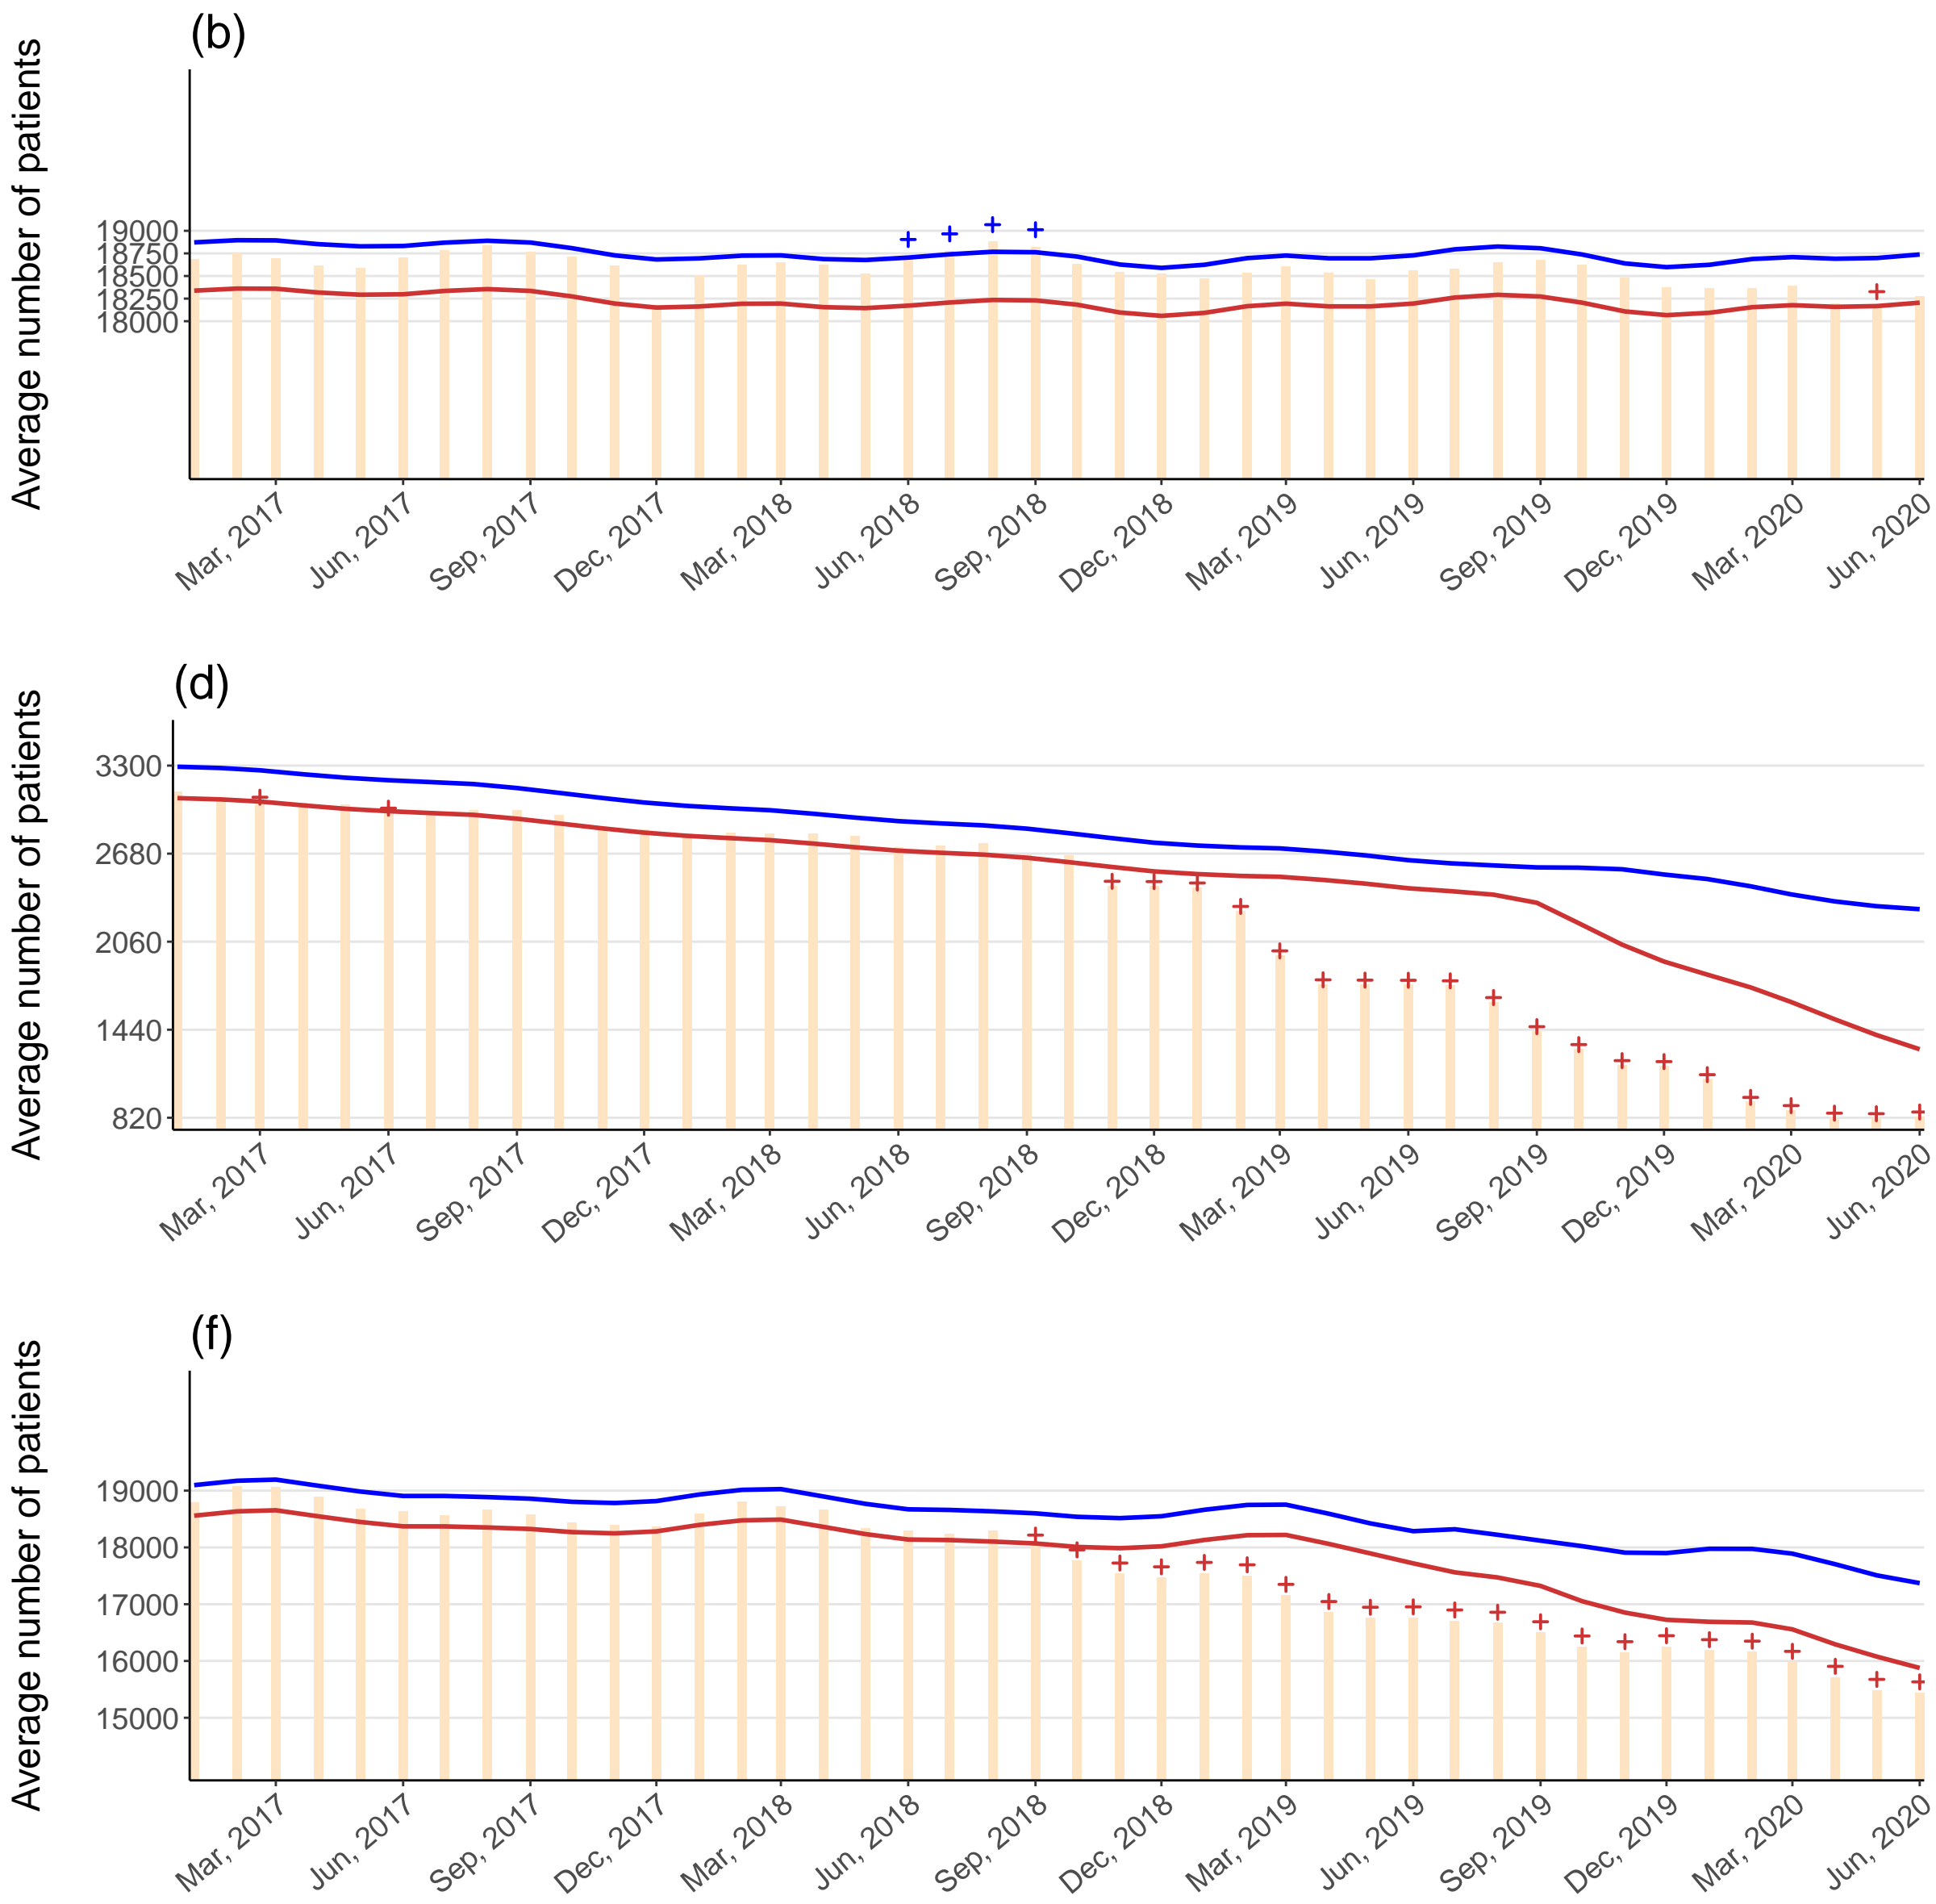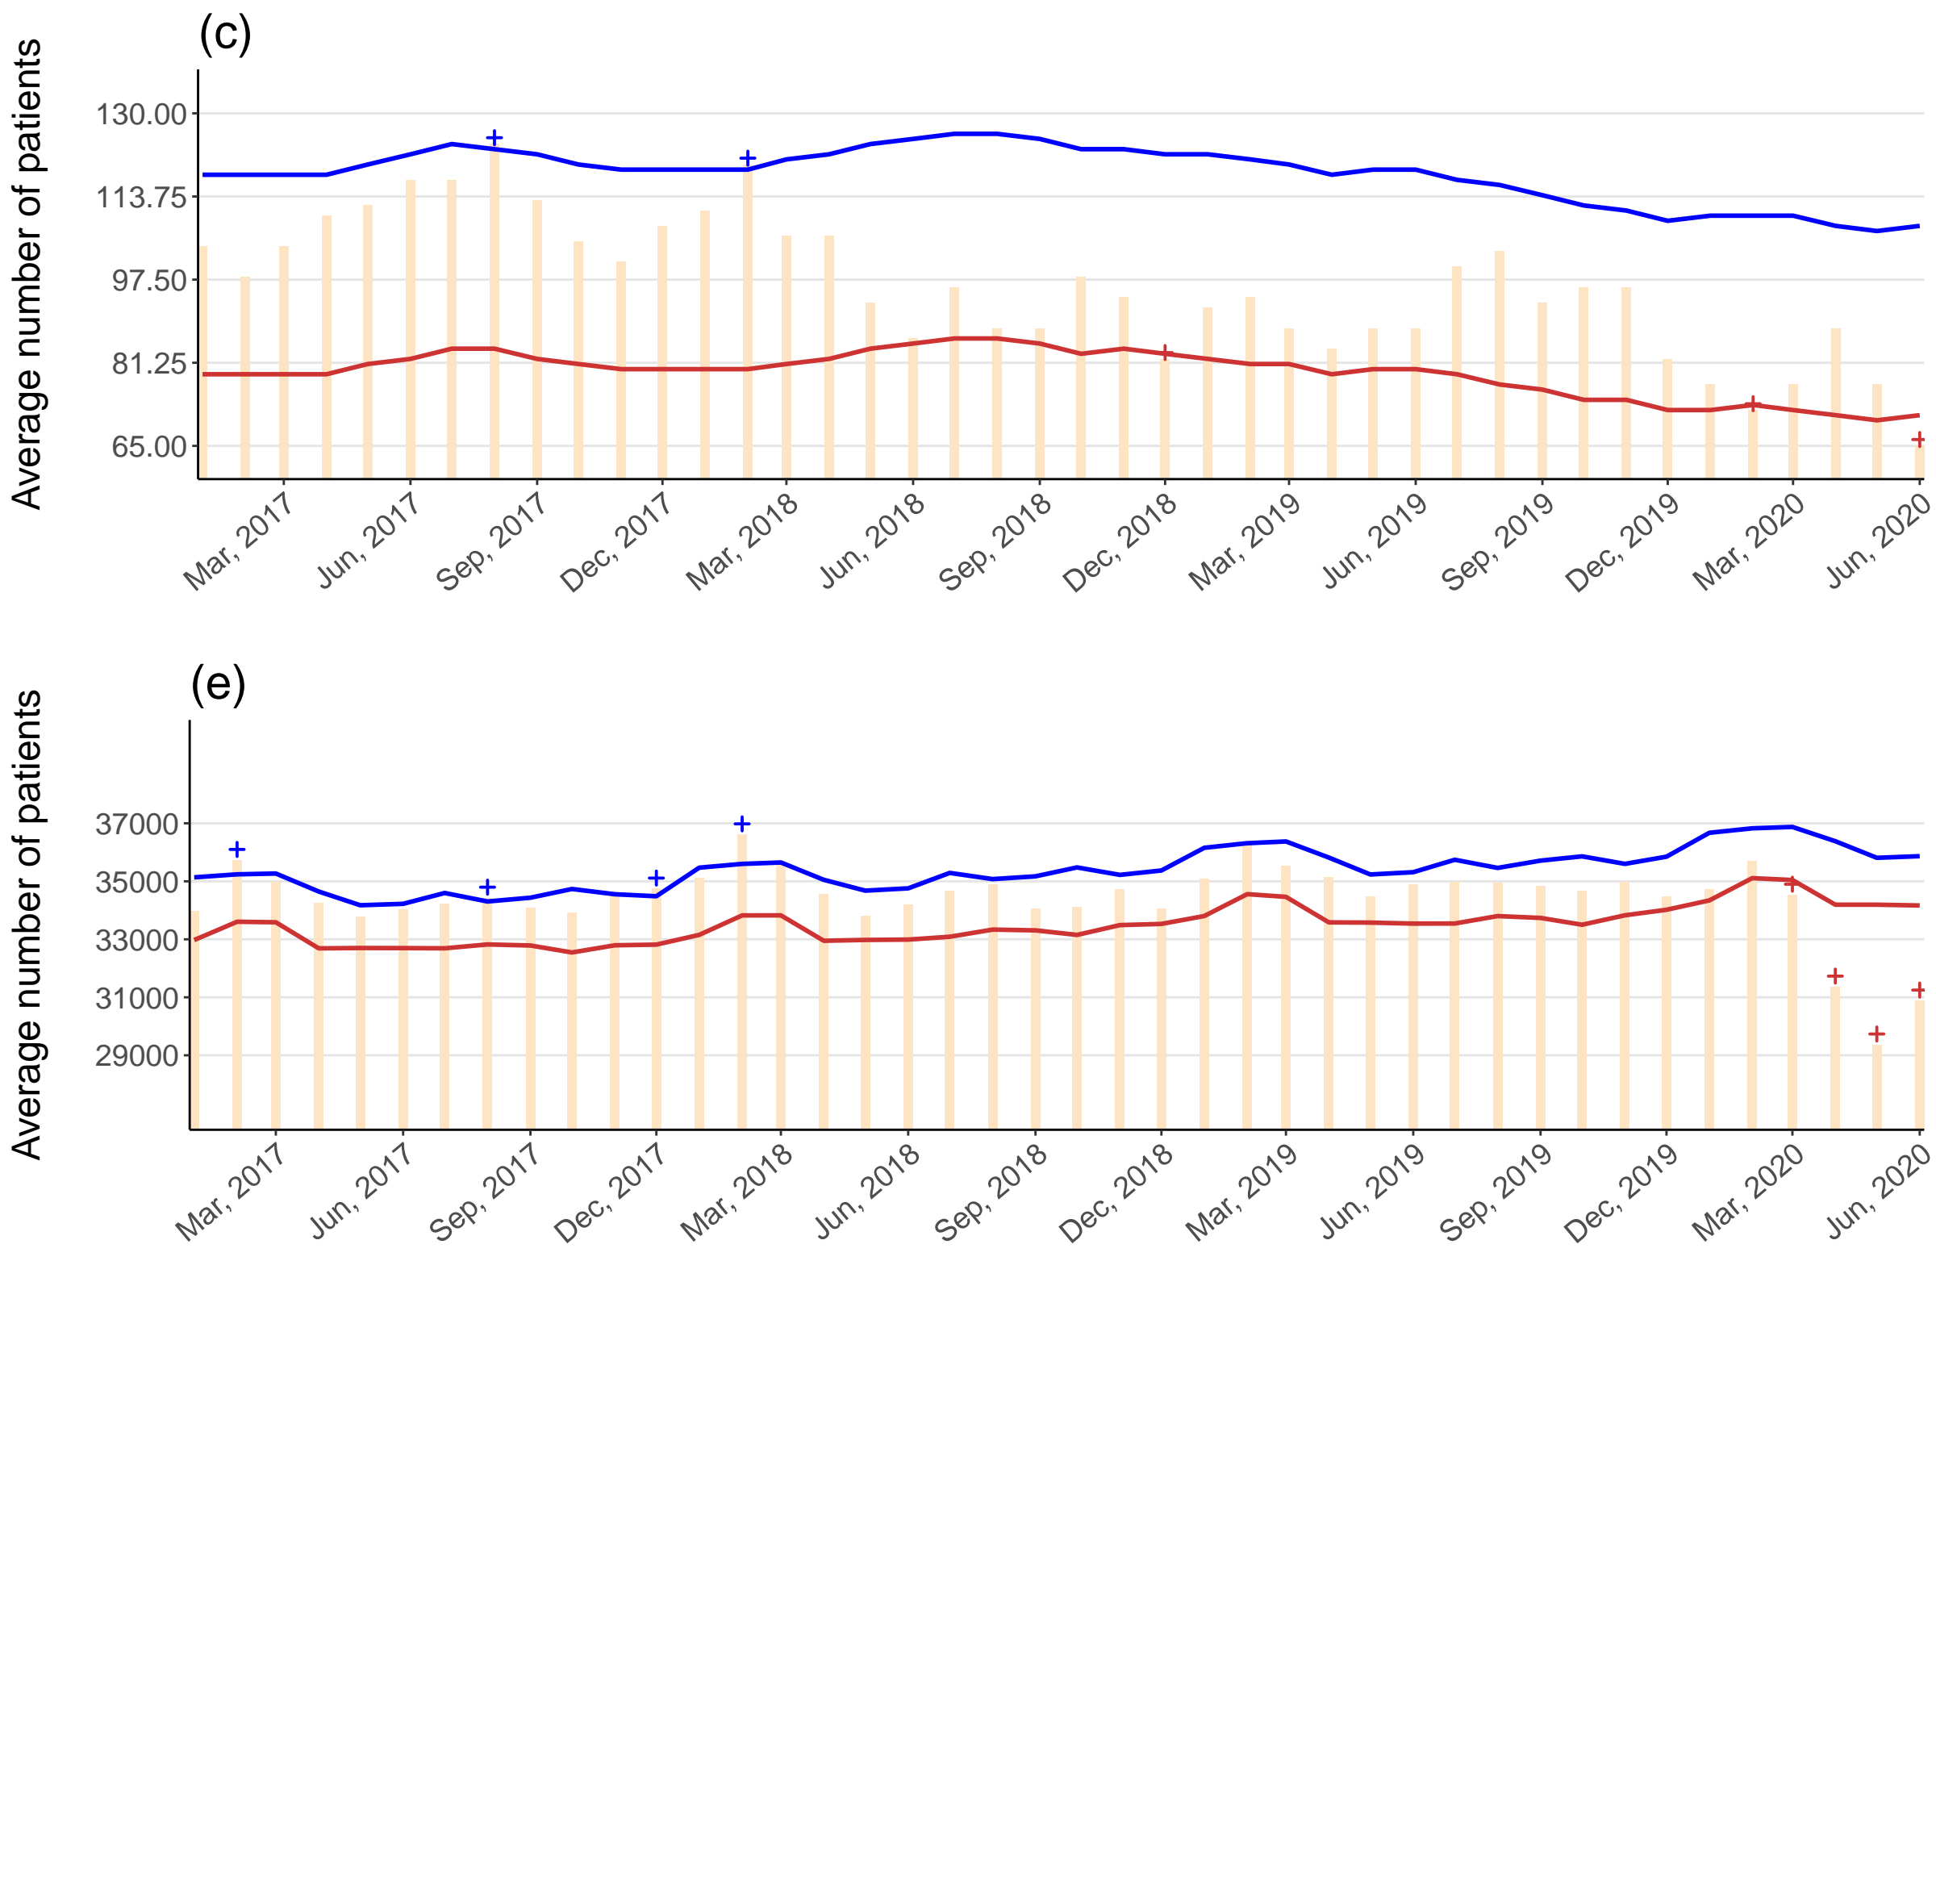

# Saga

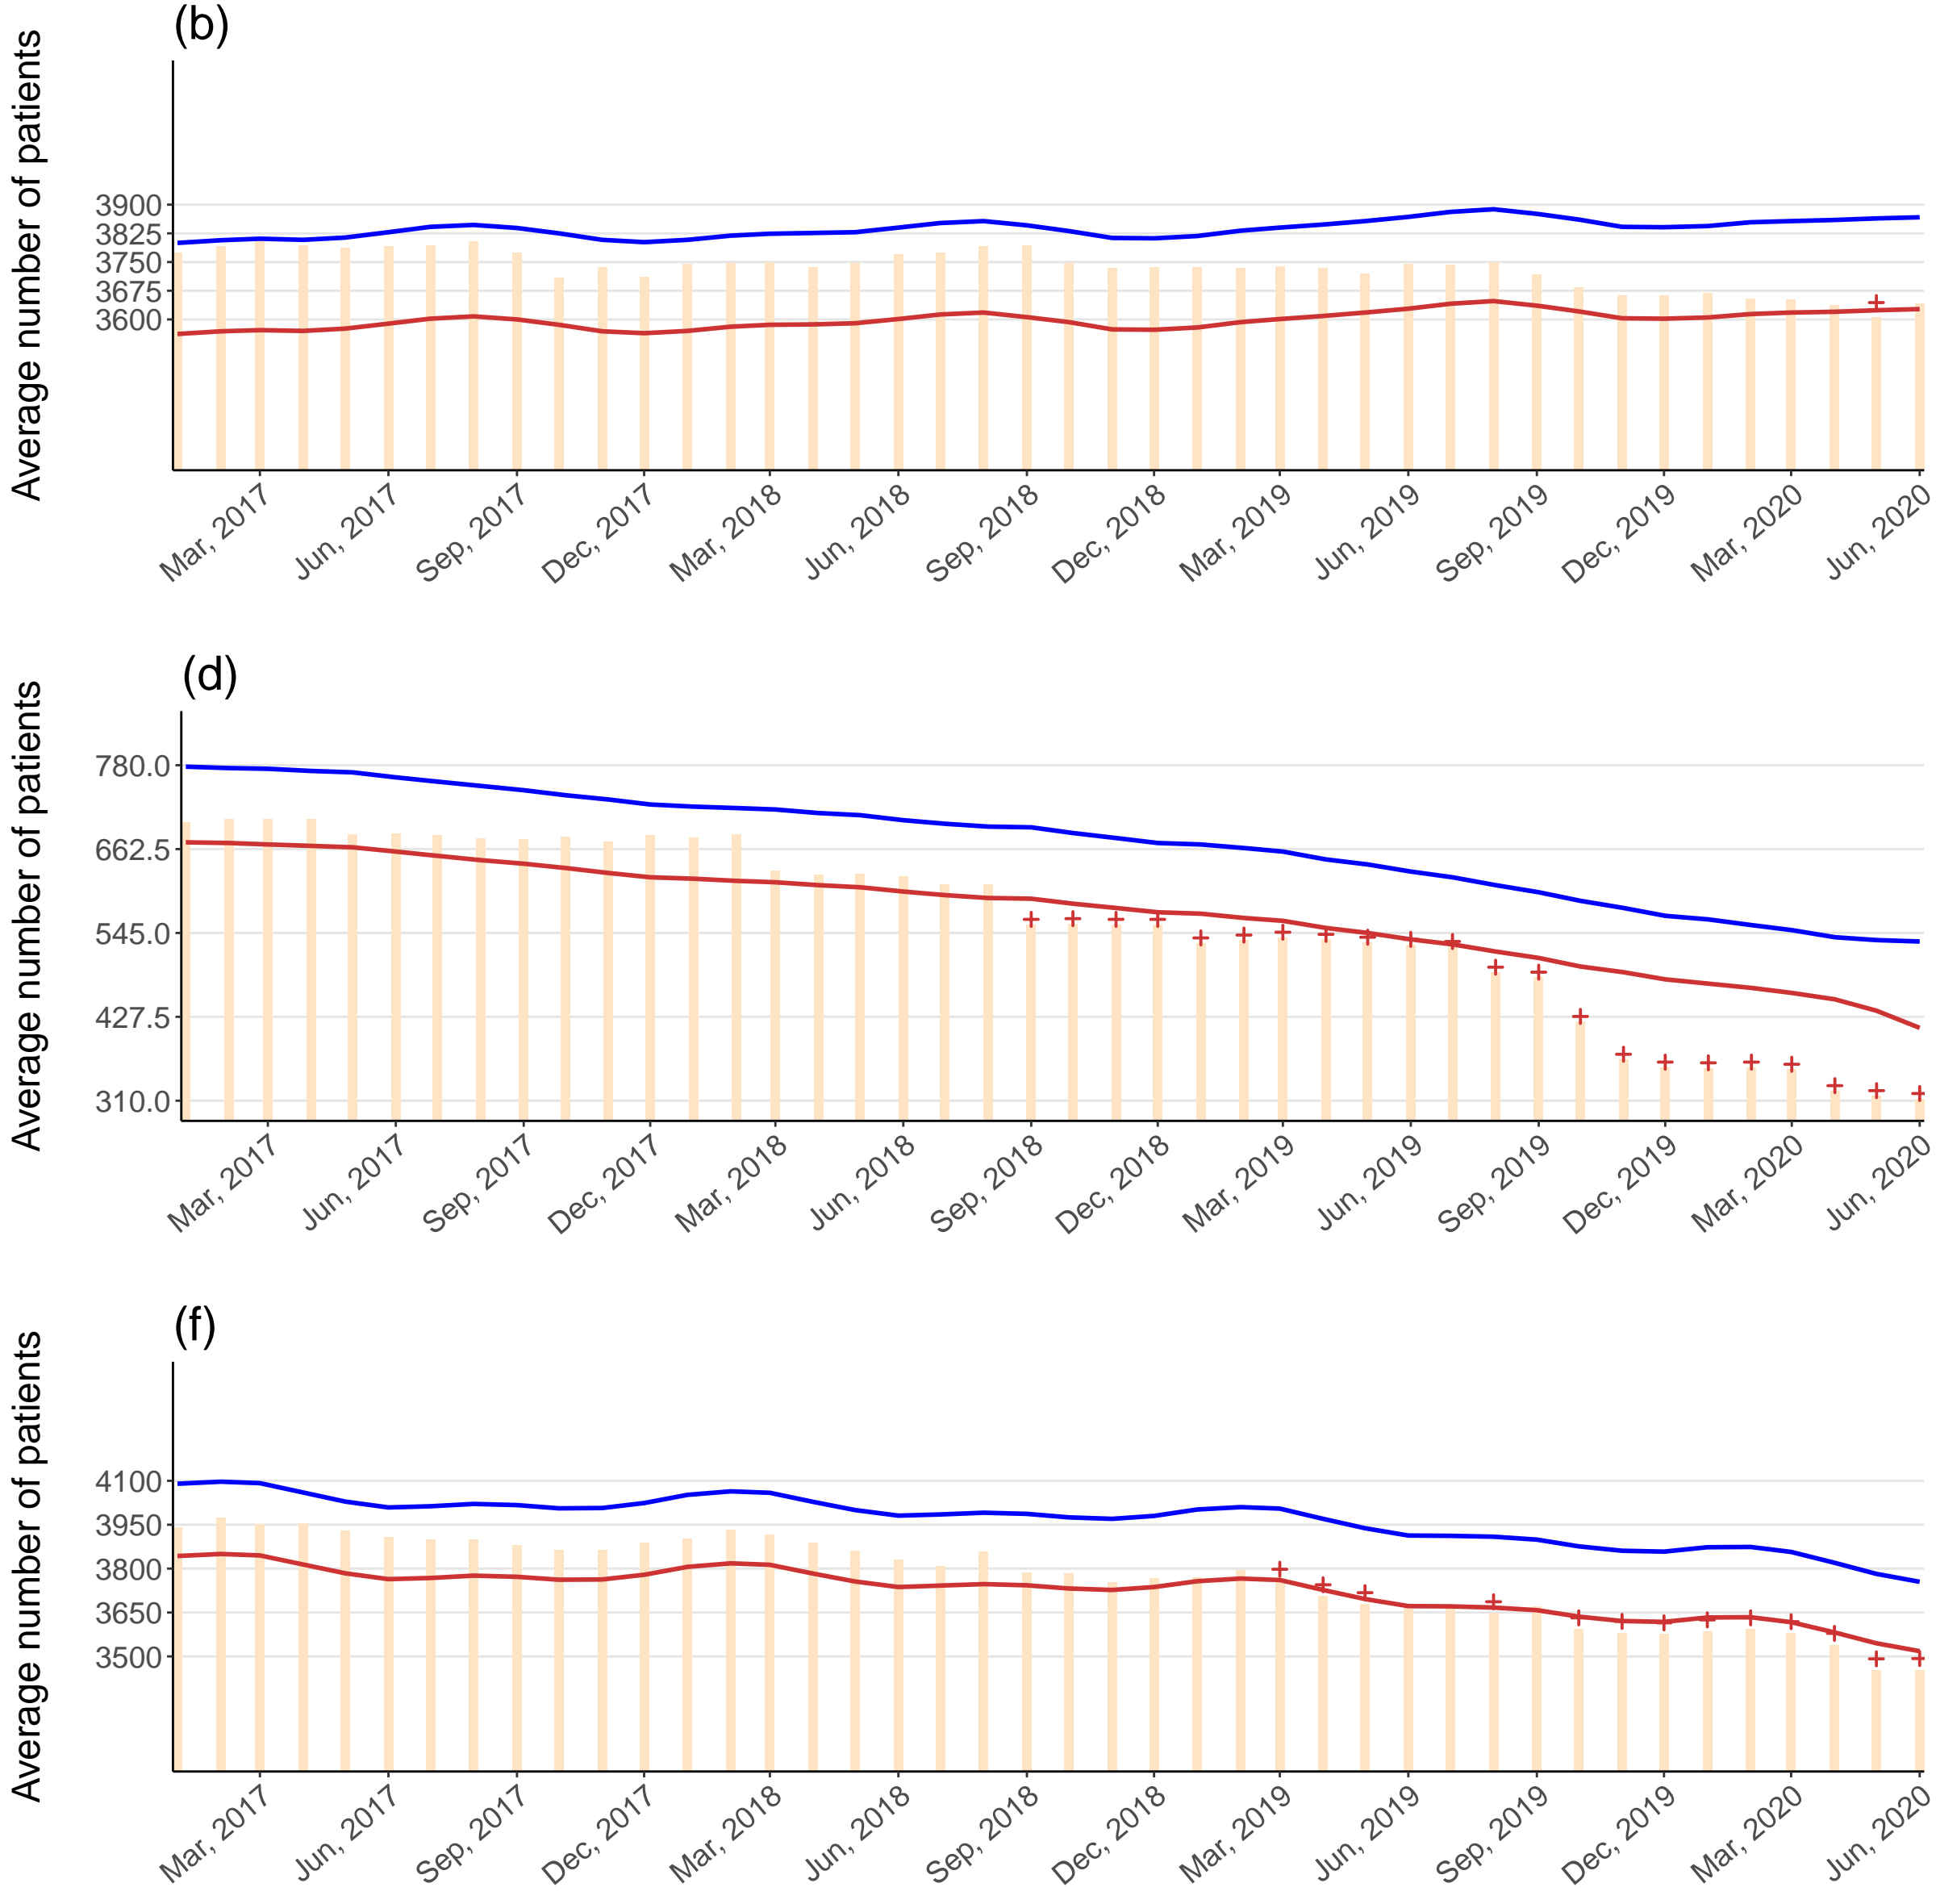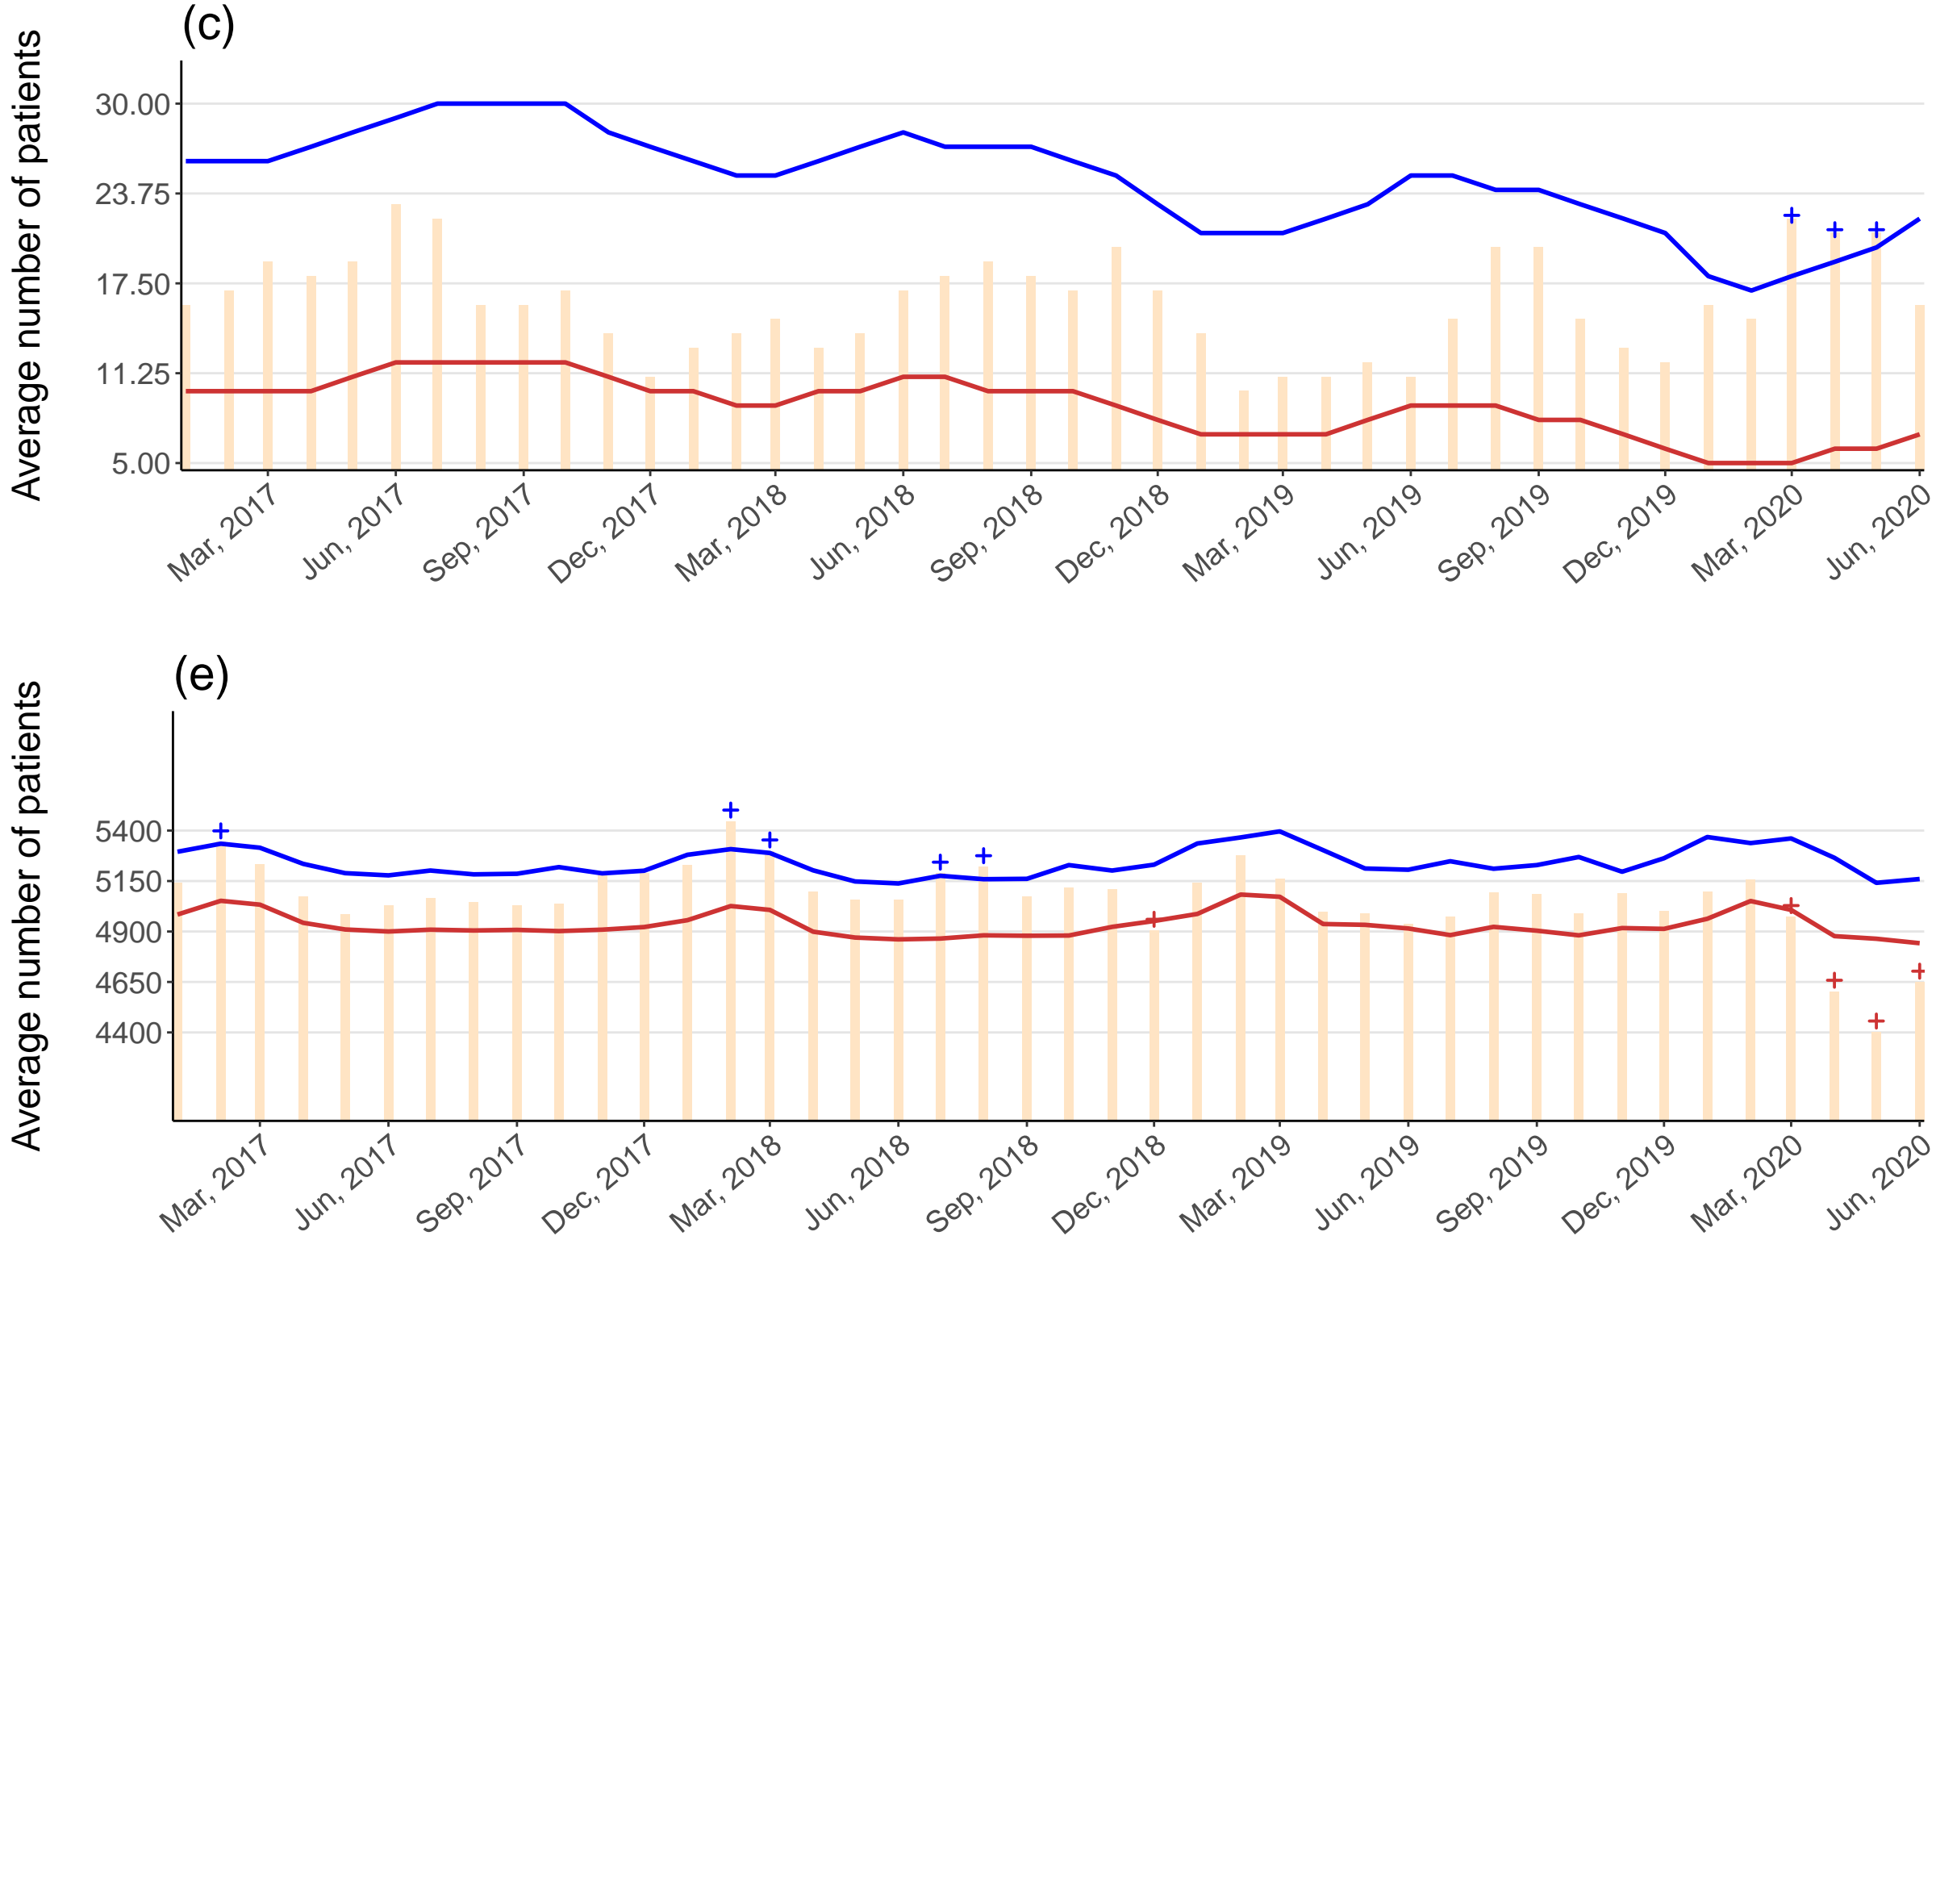

# Nagasaki

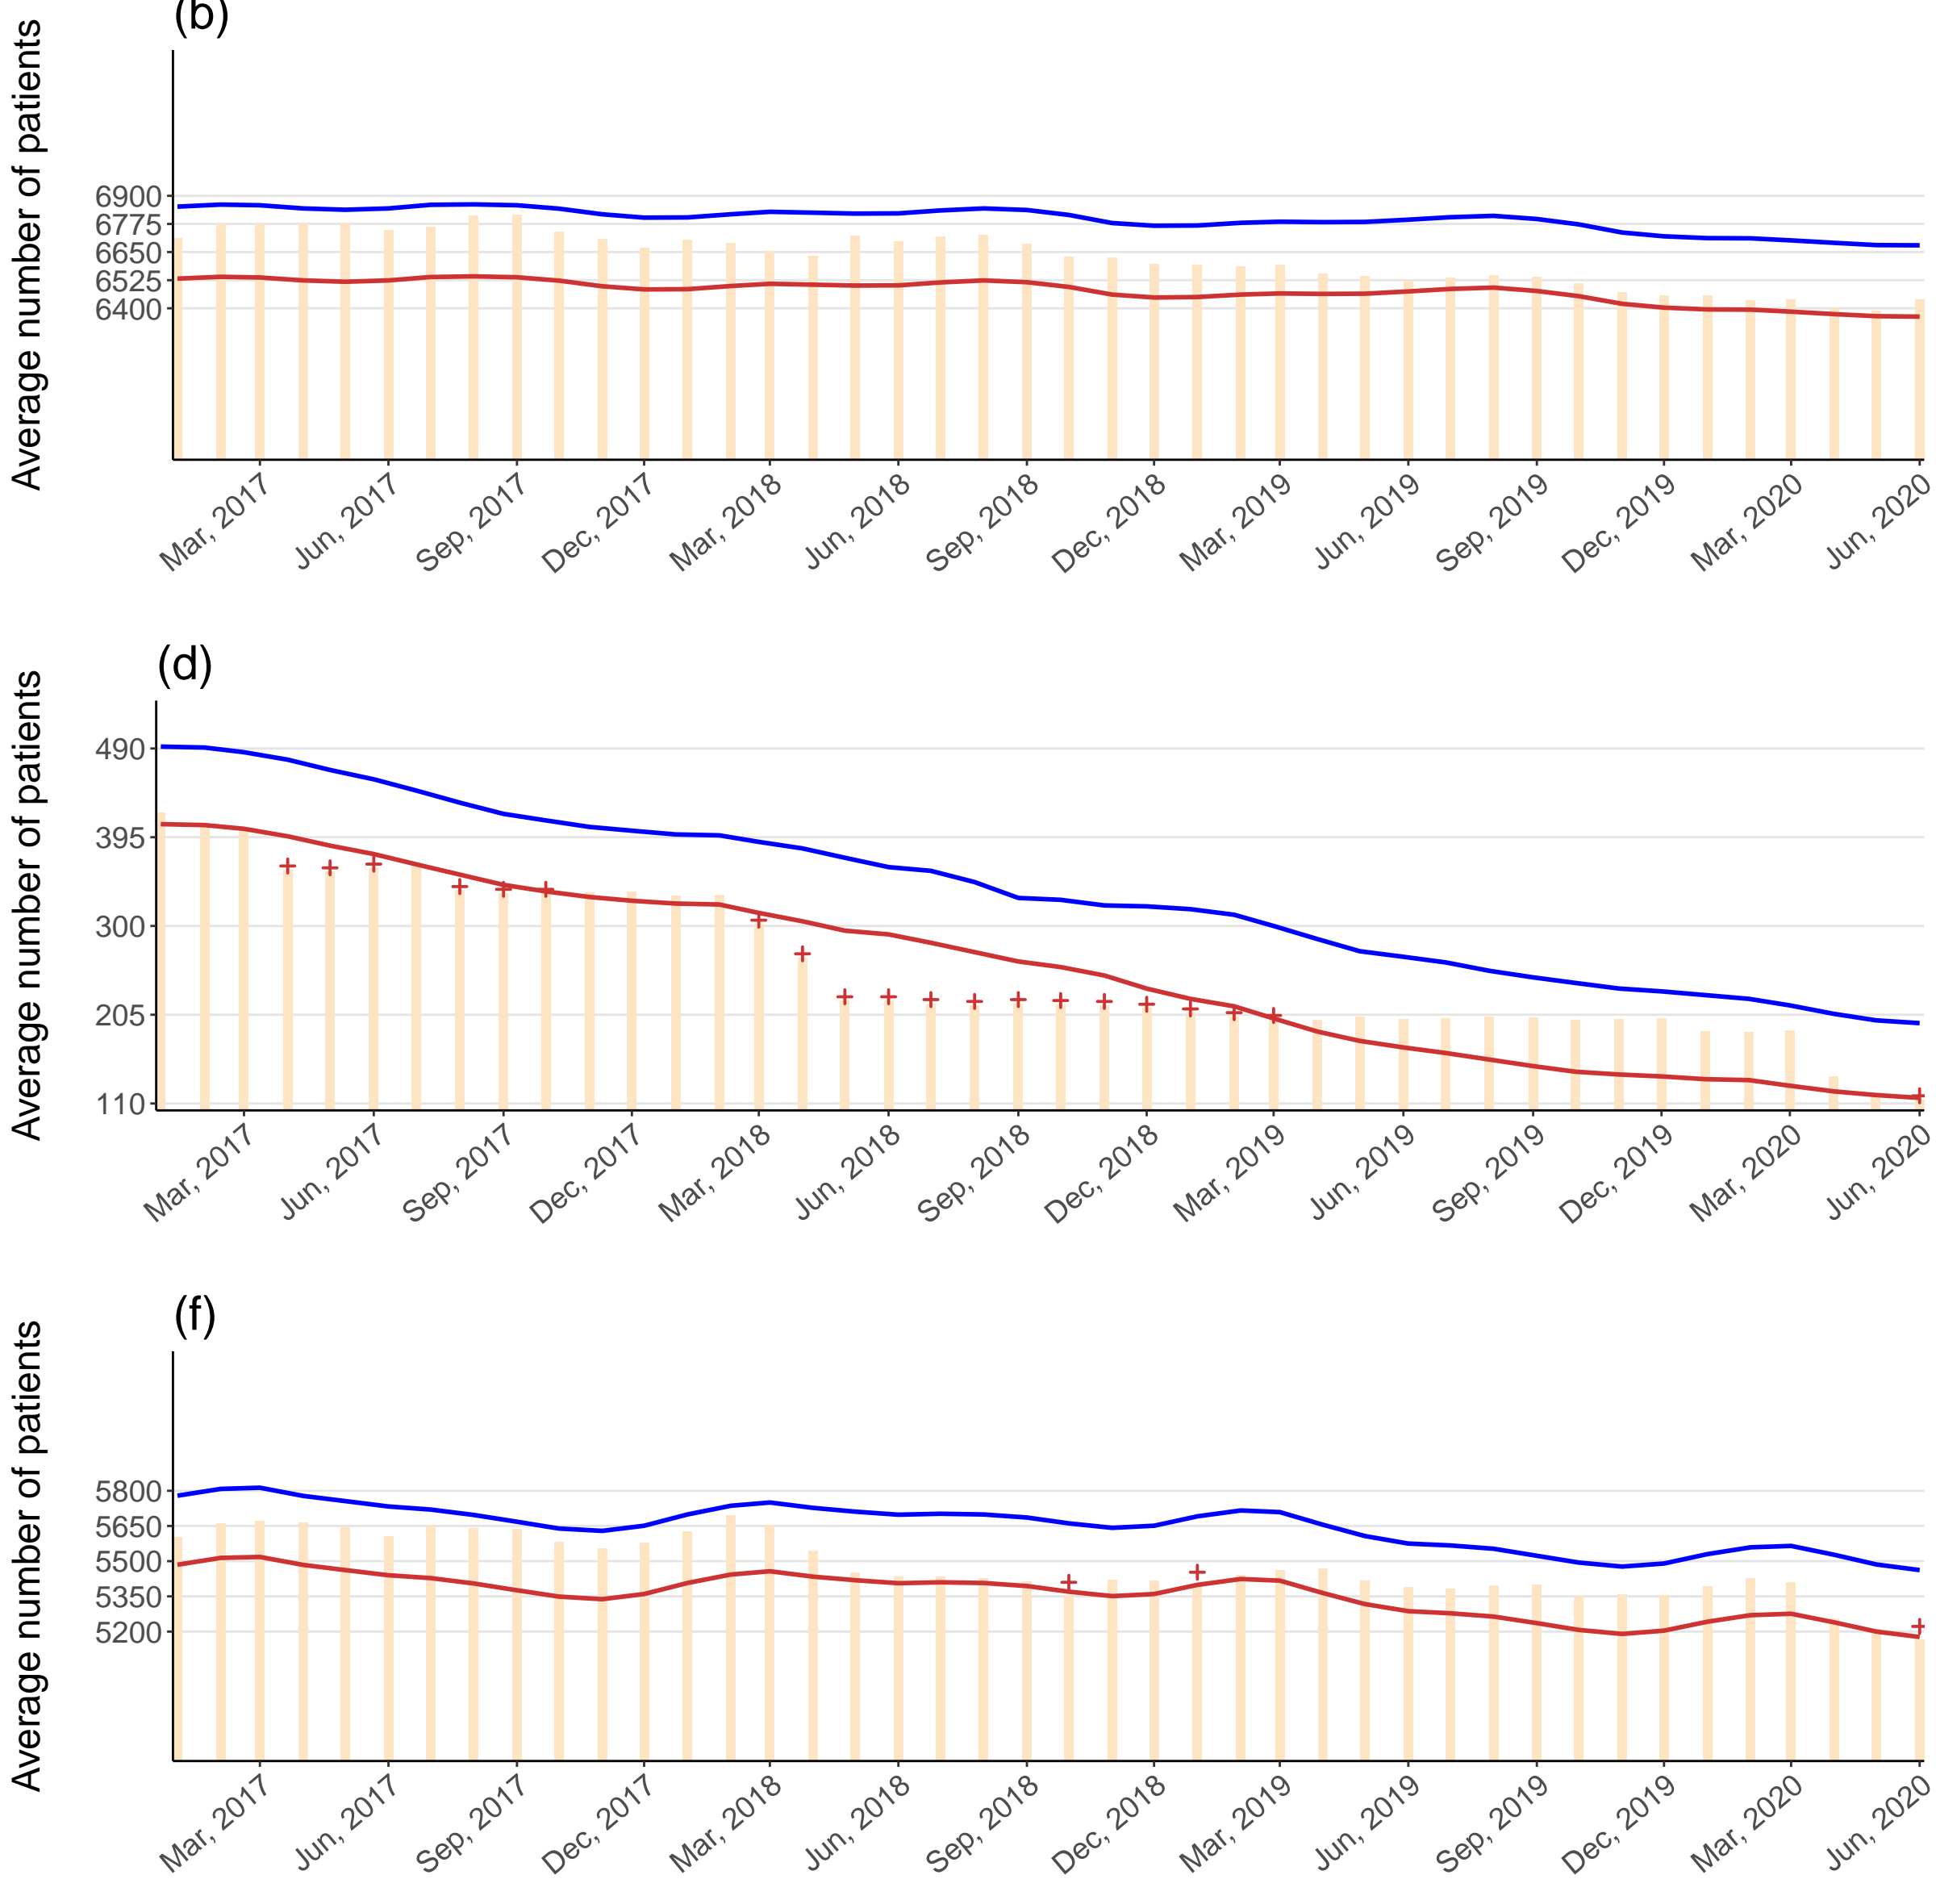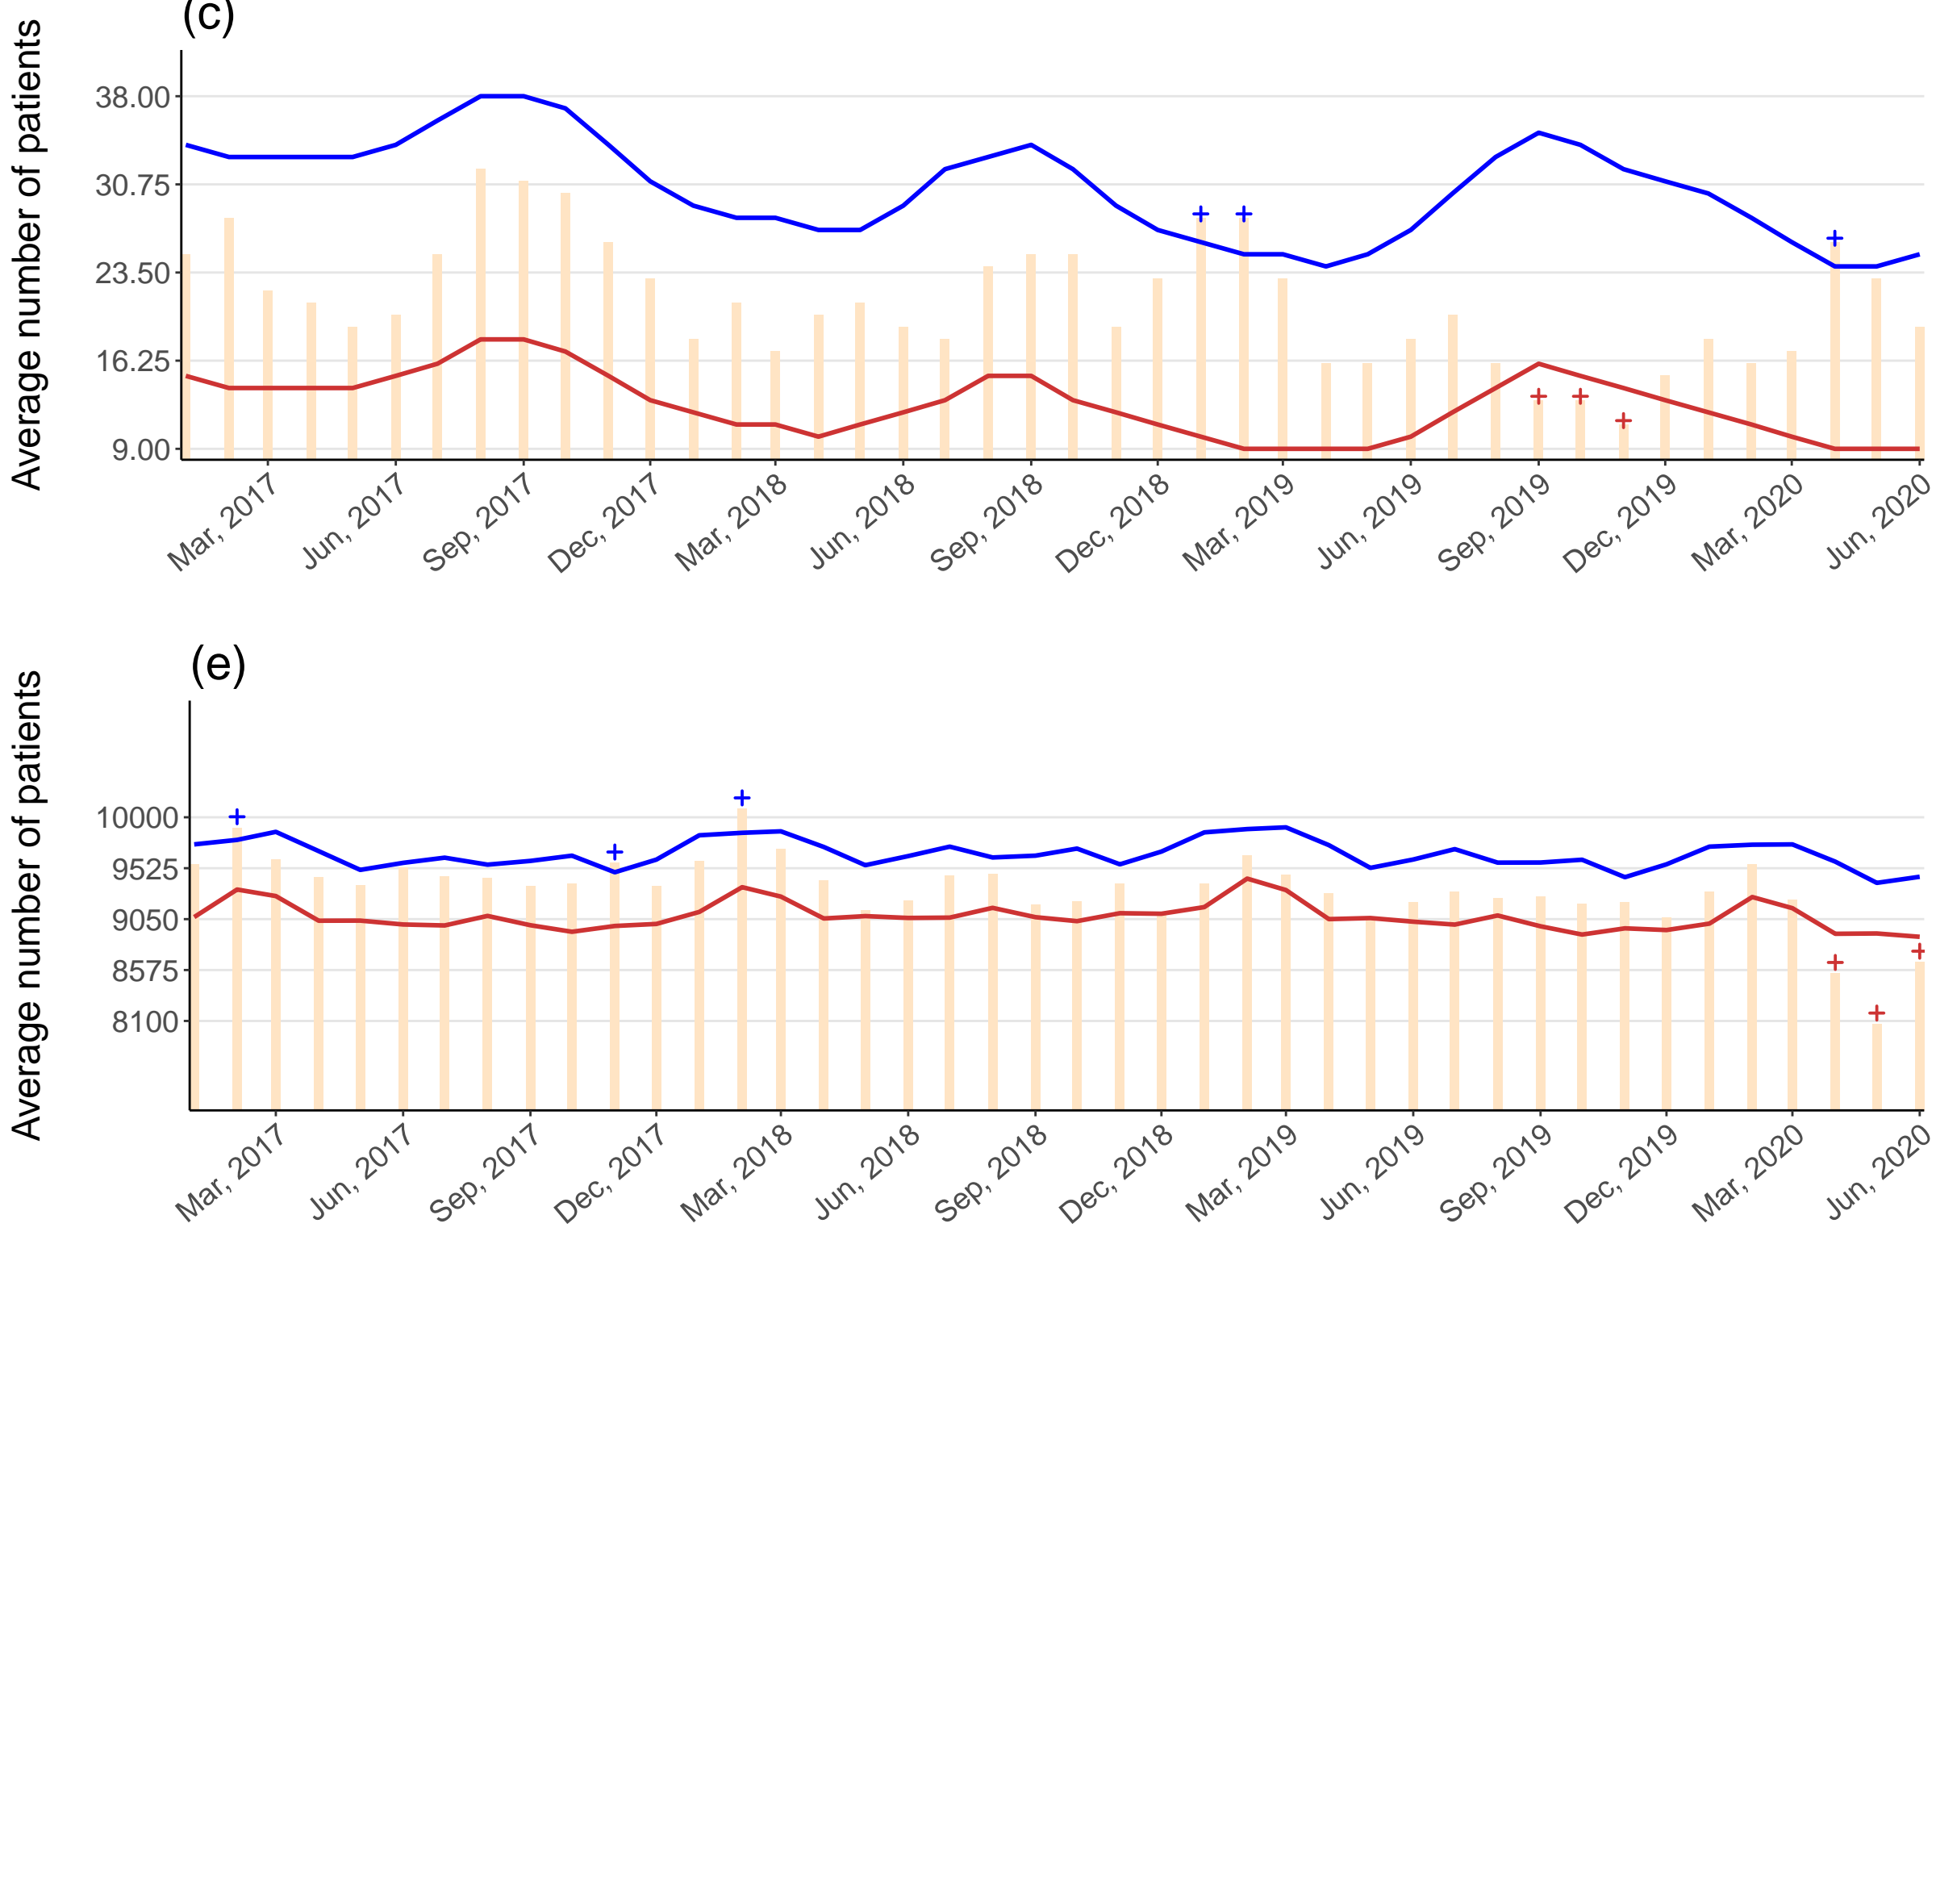



# Kumamoto

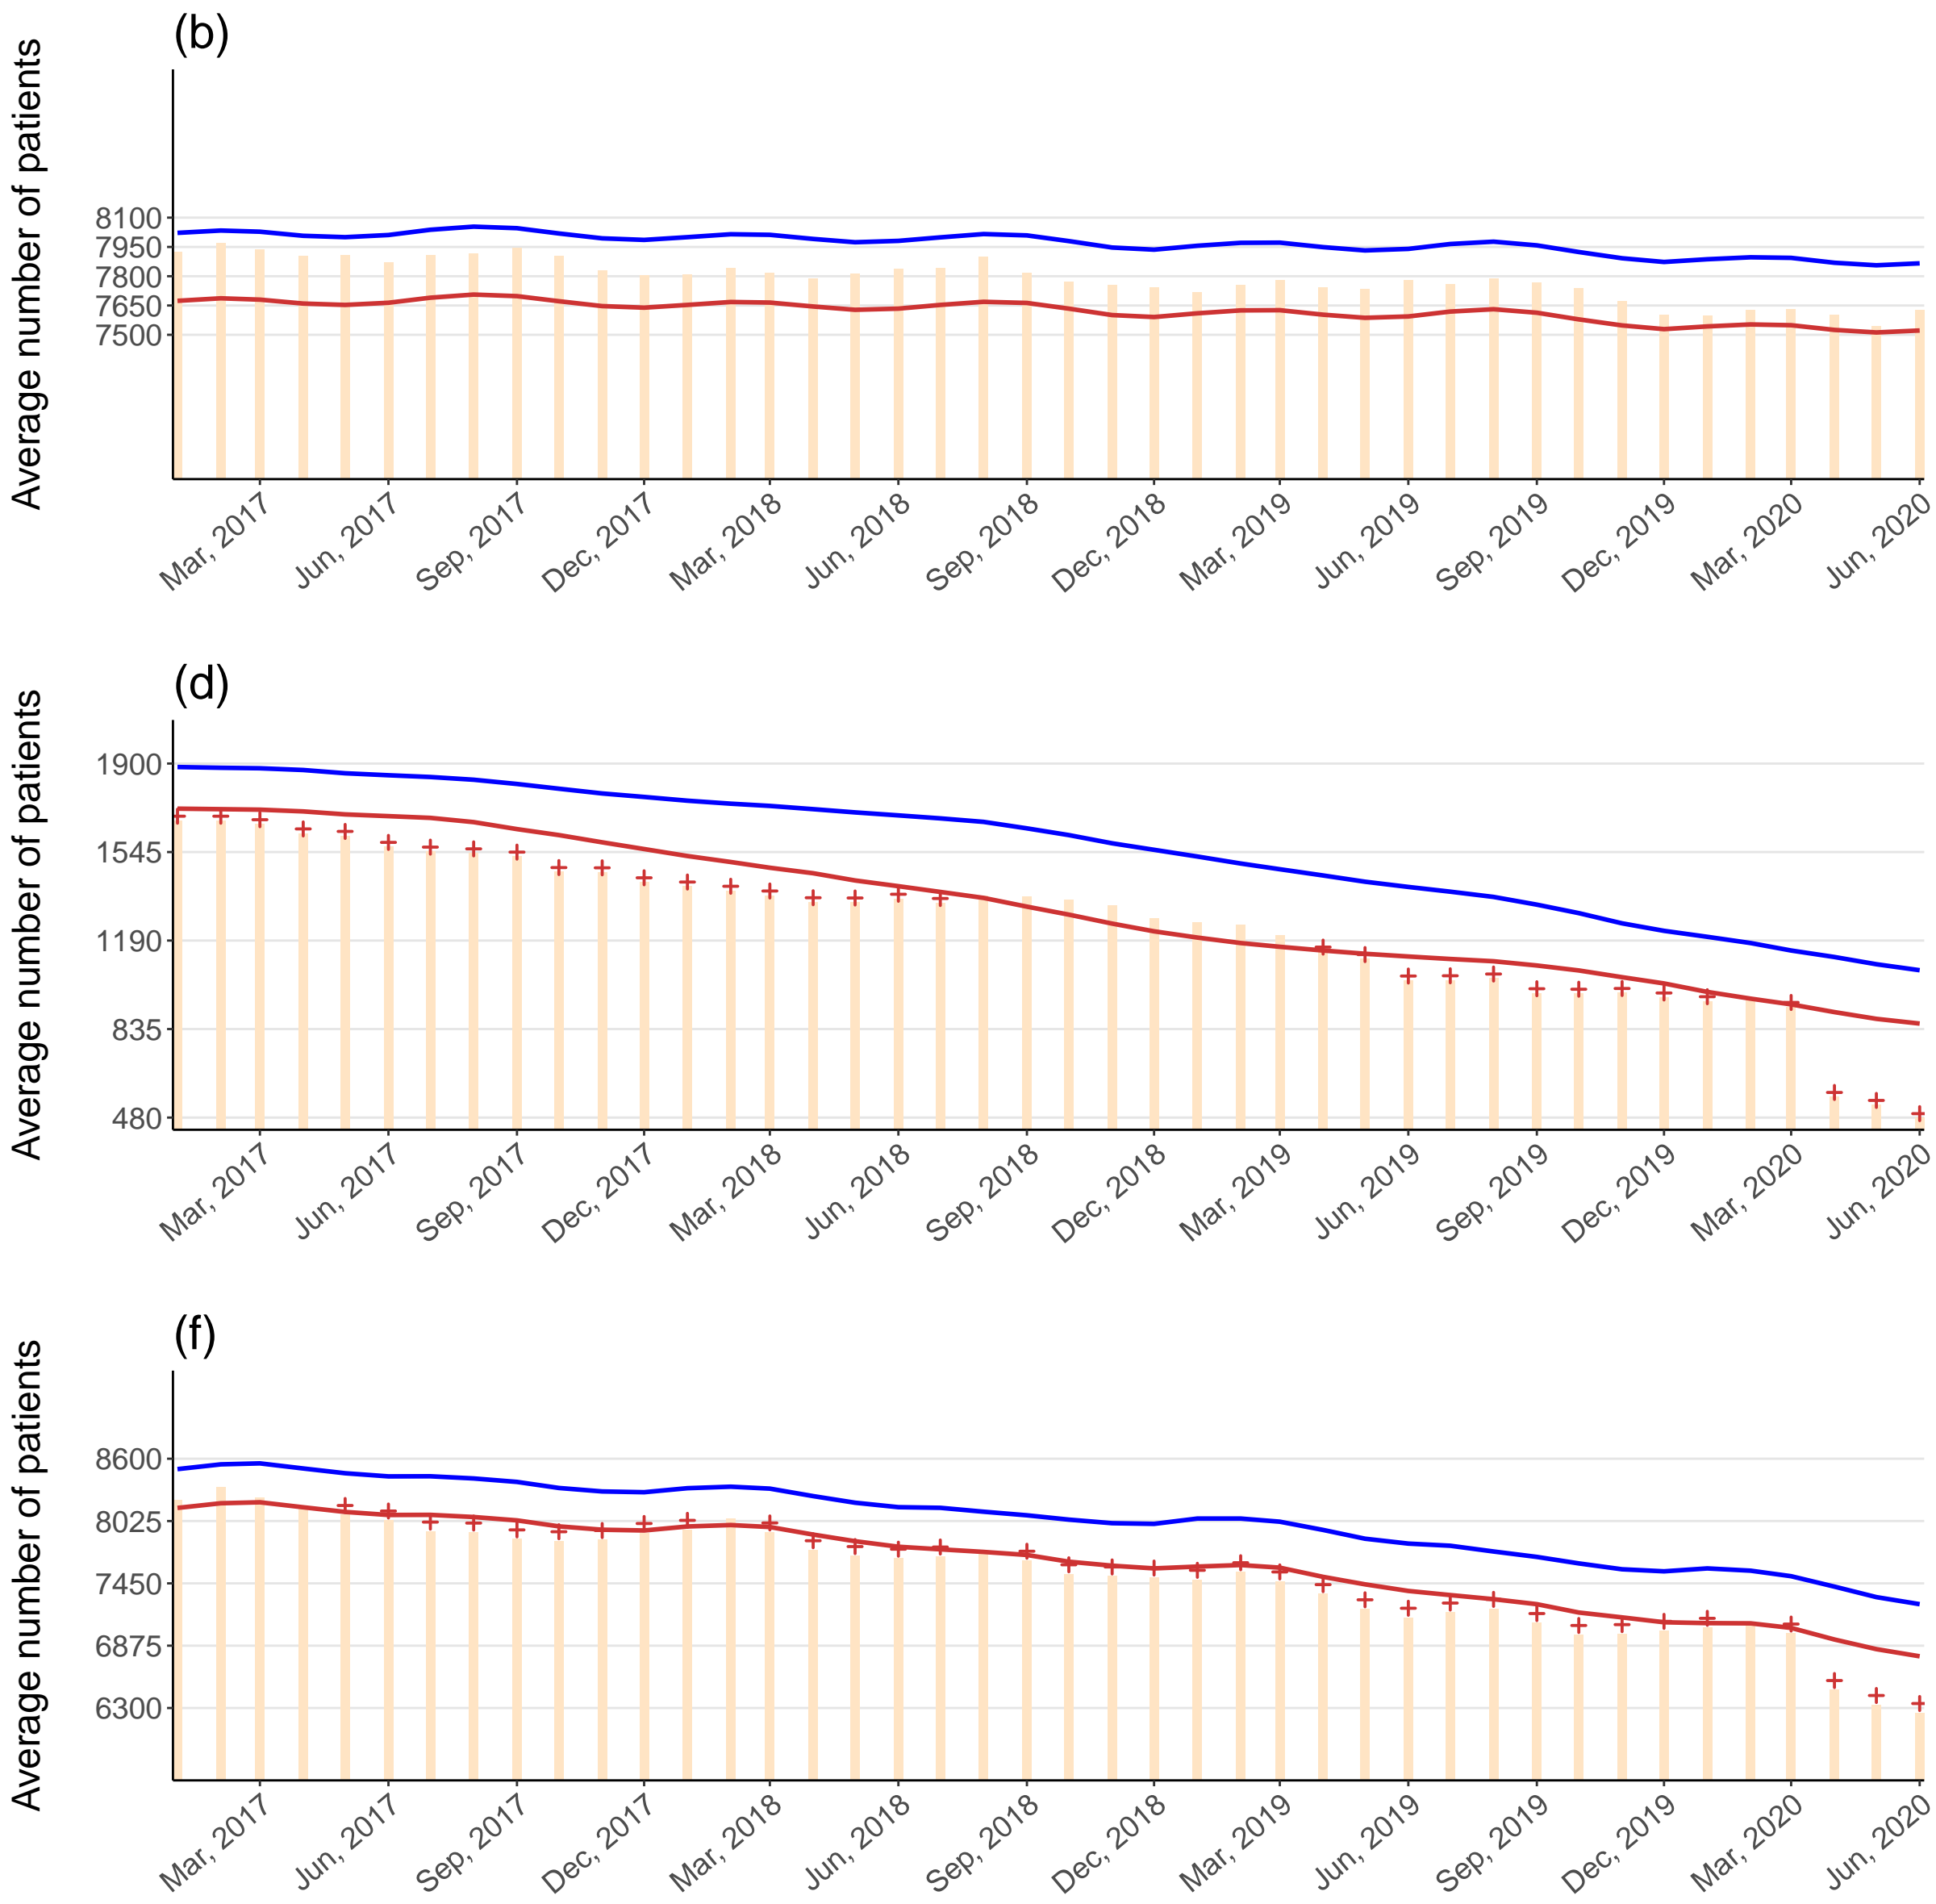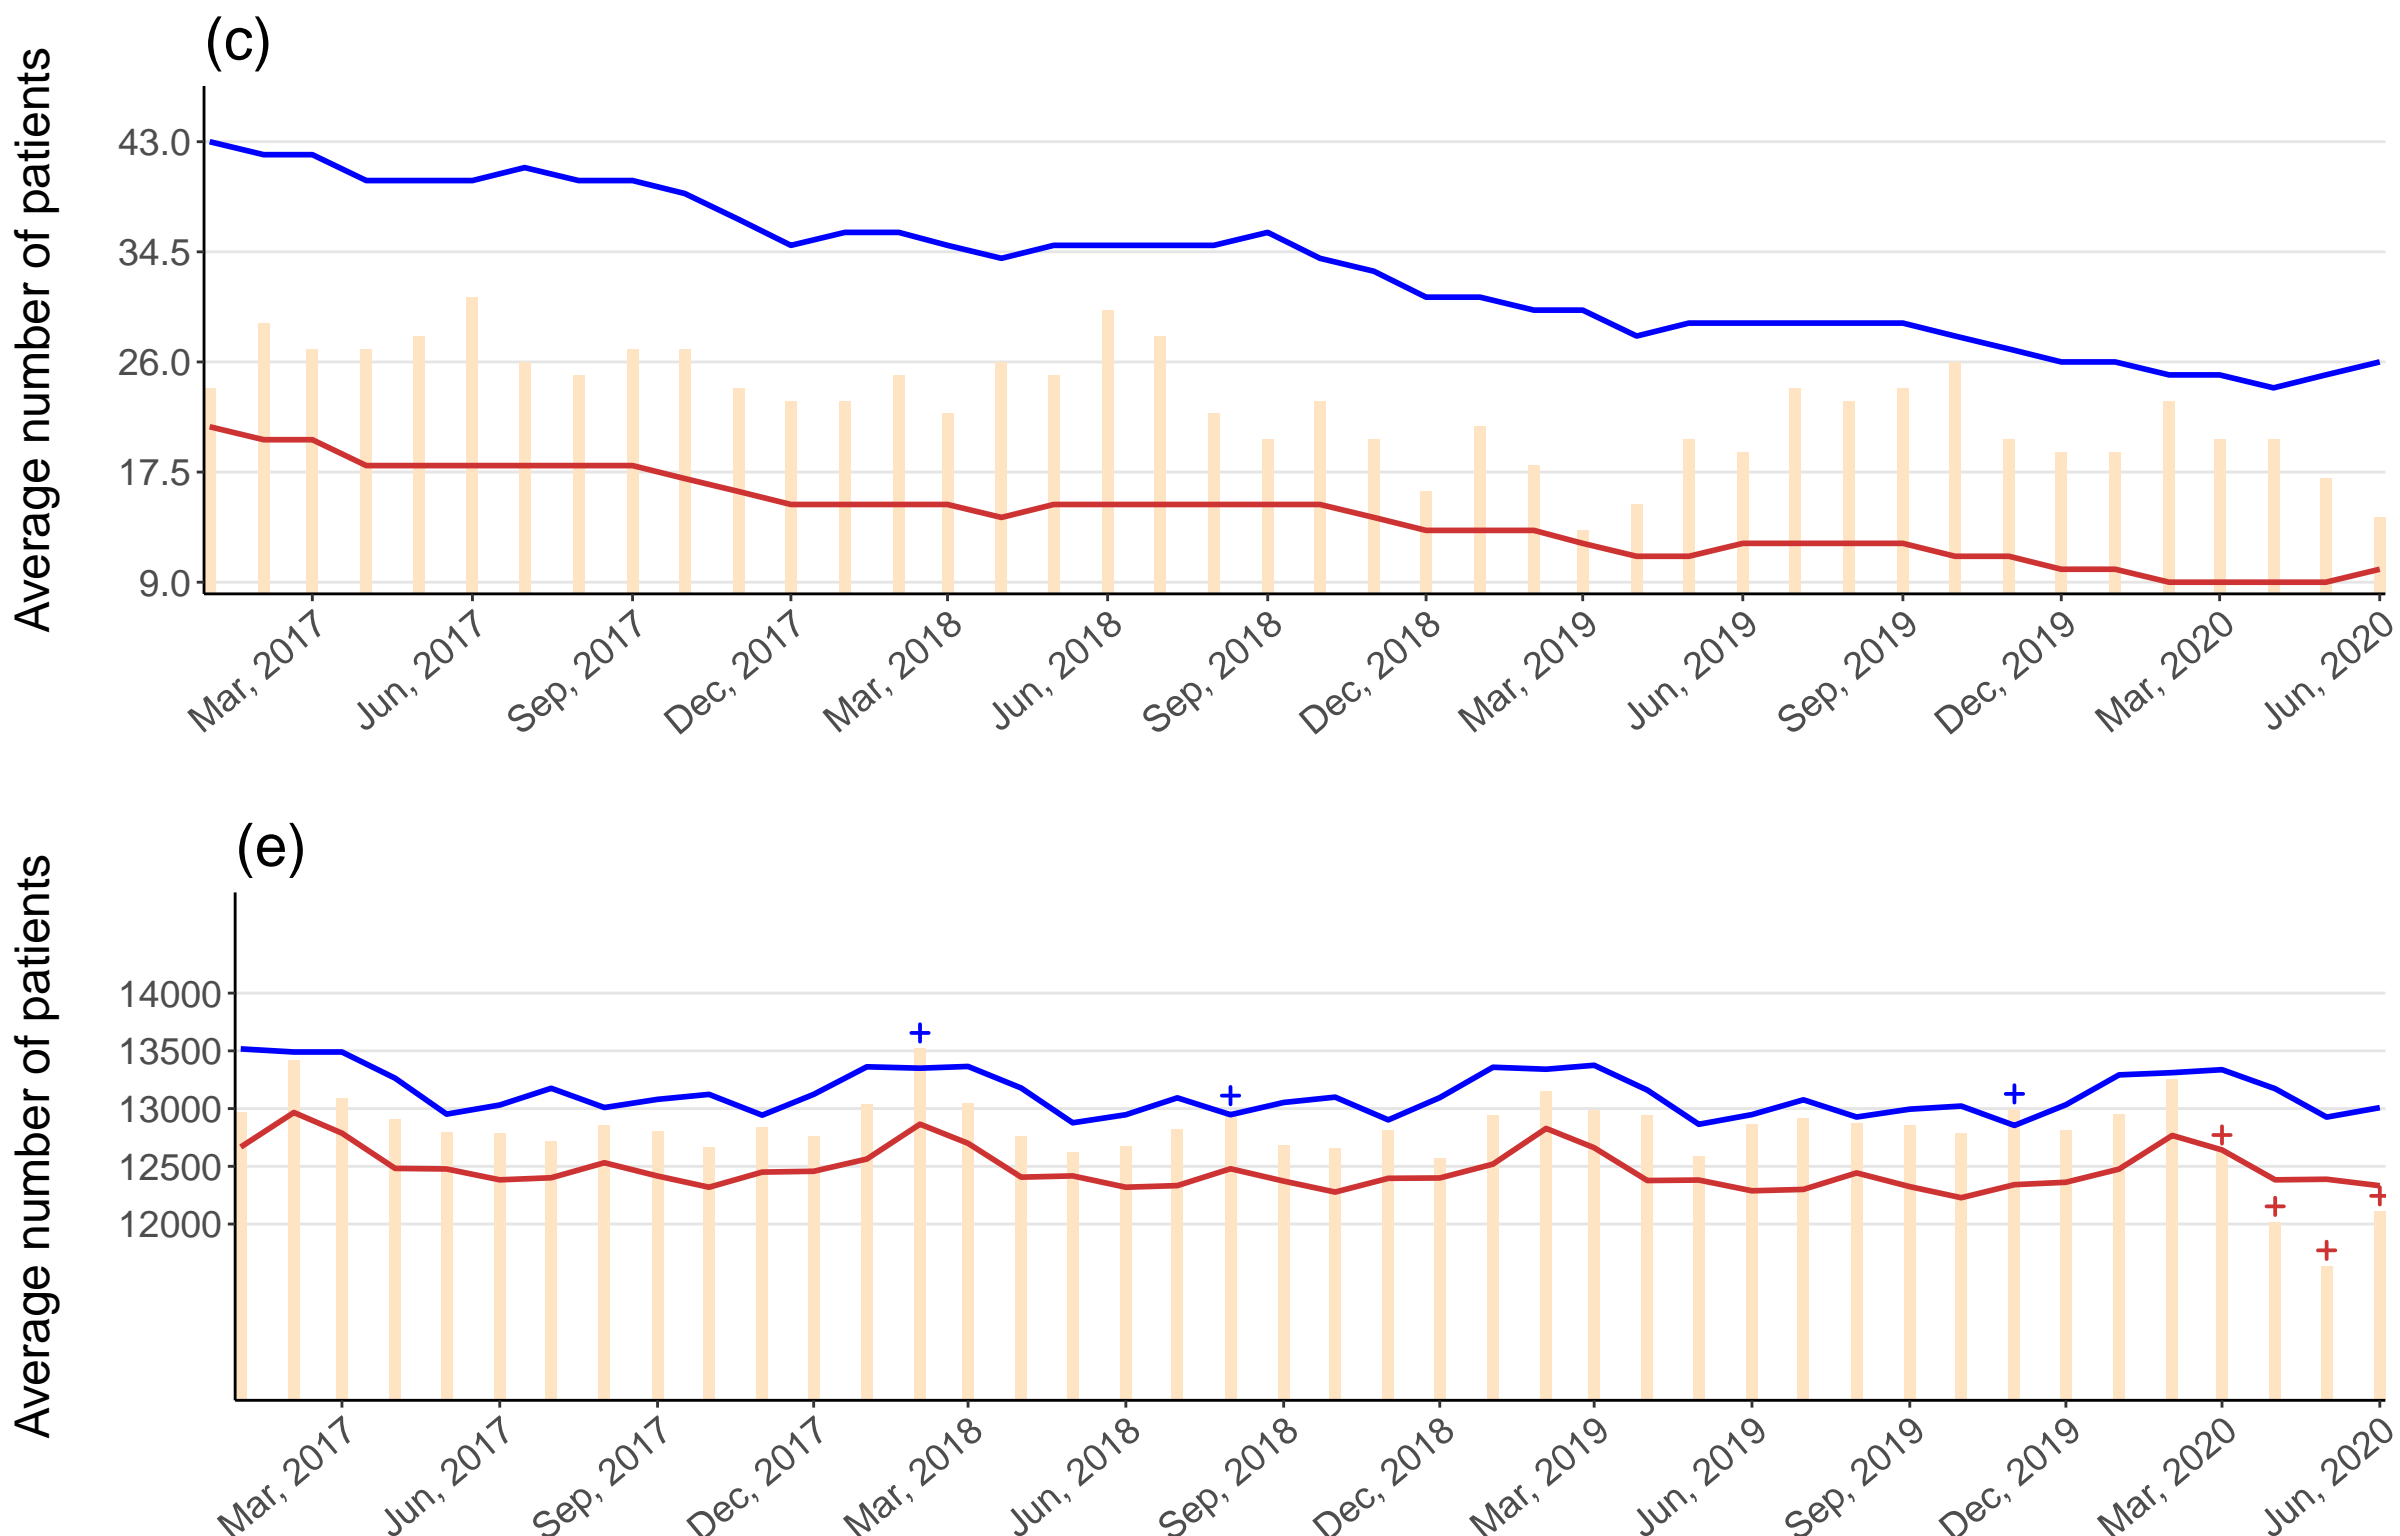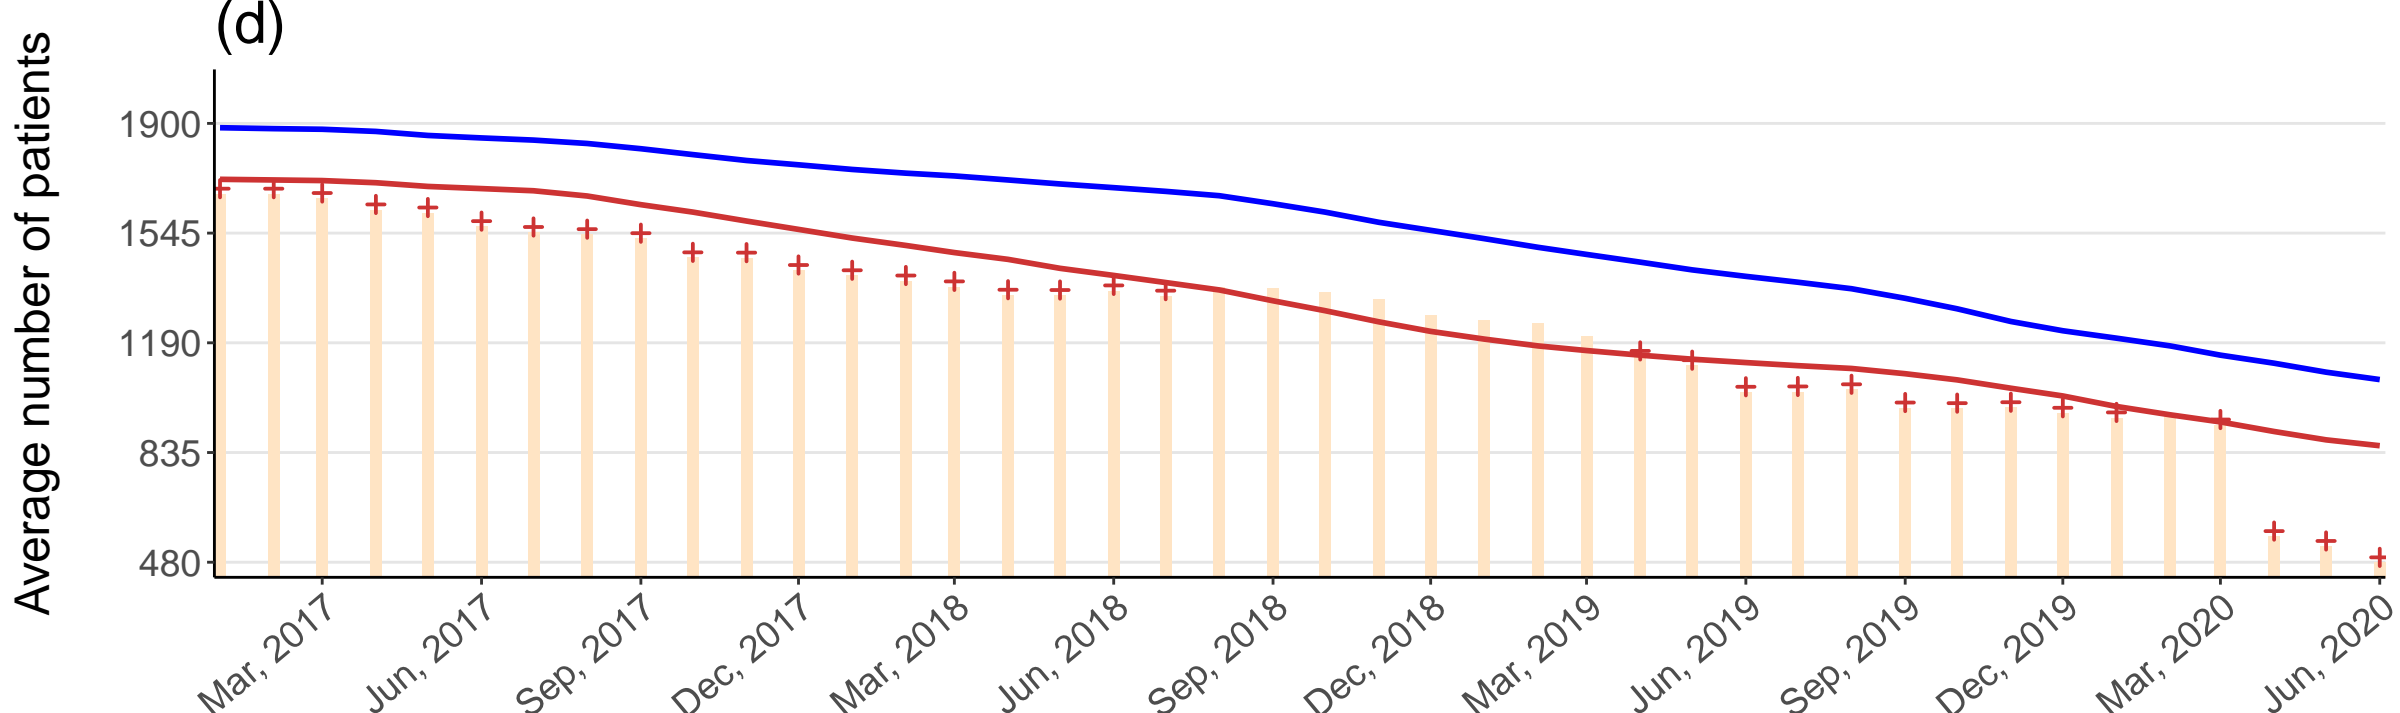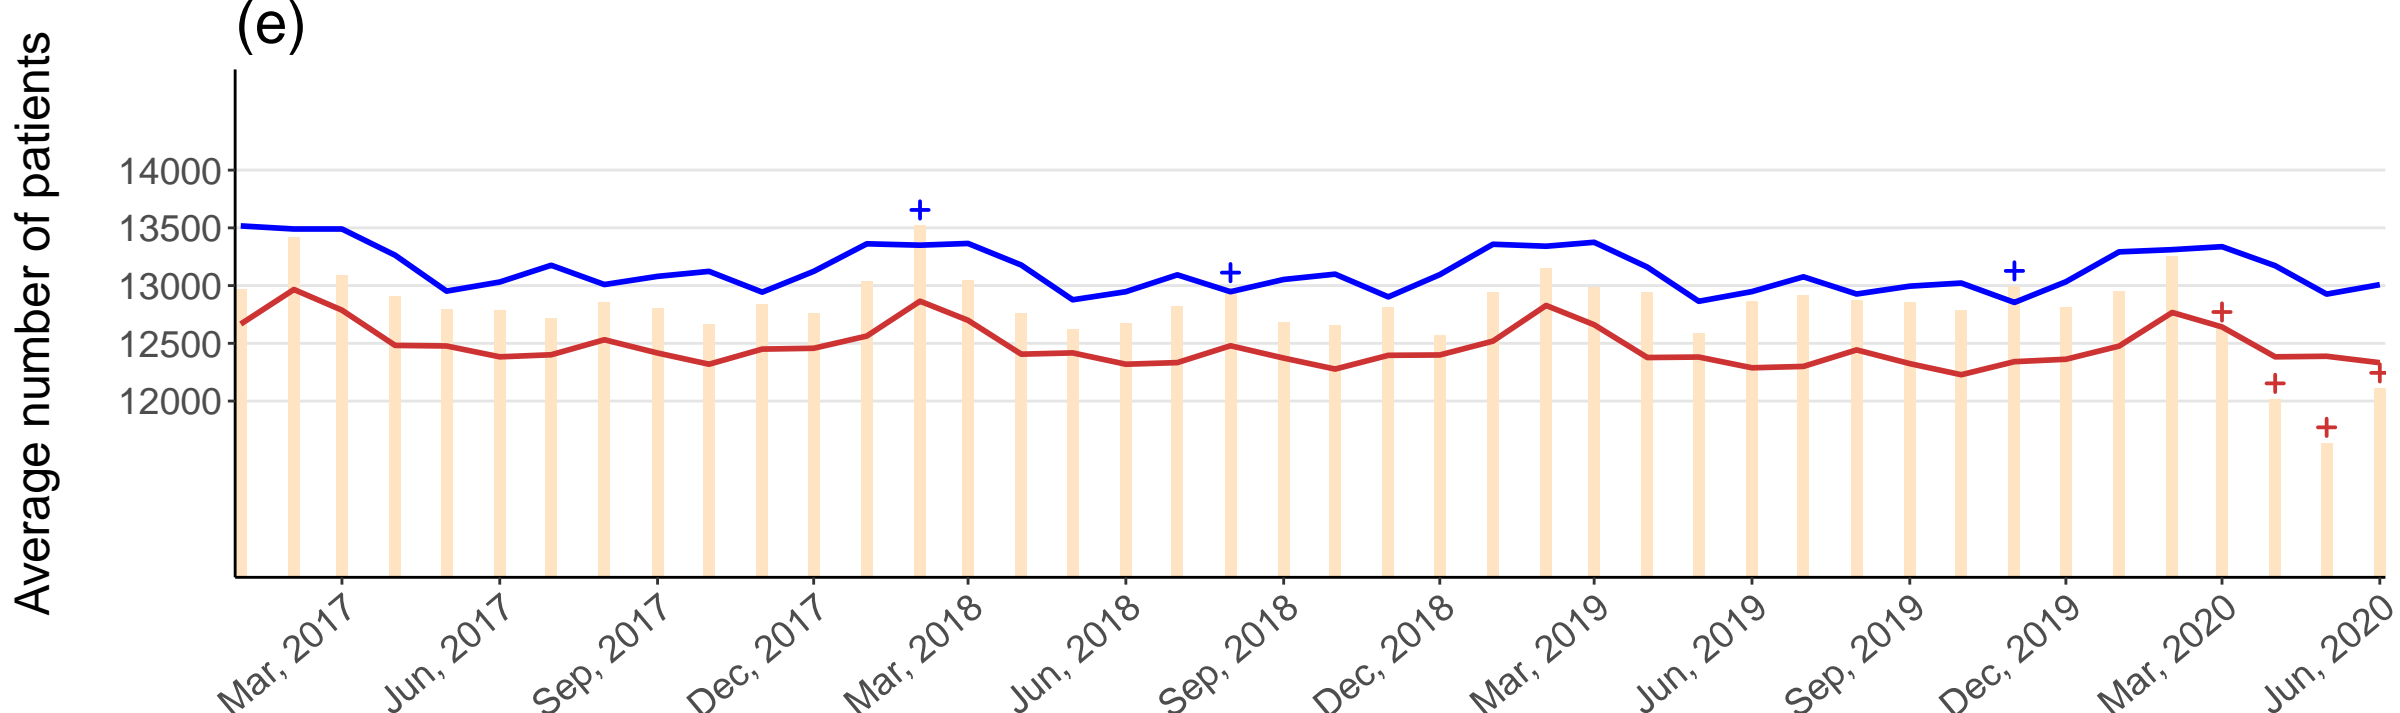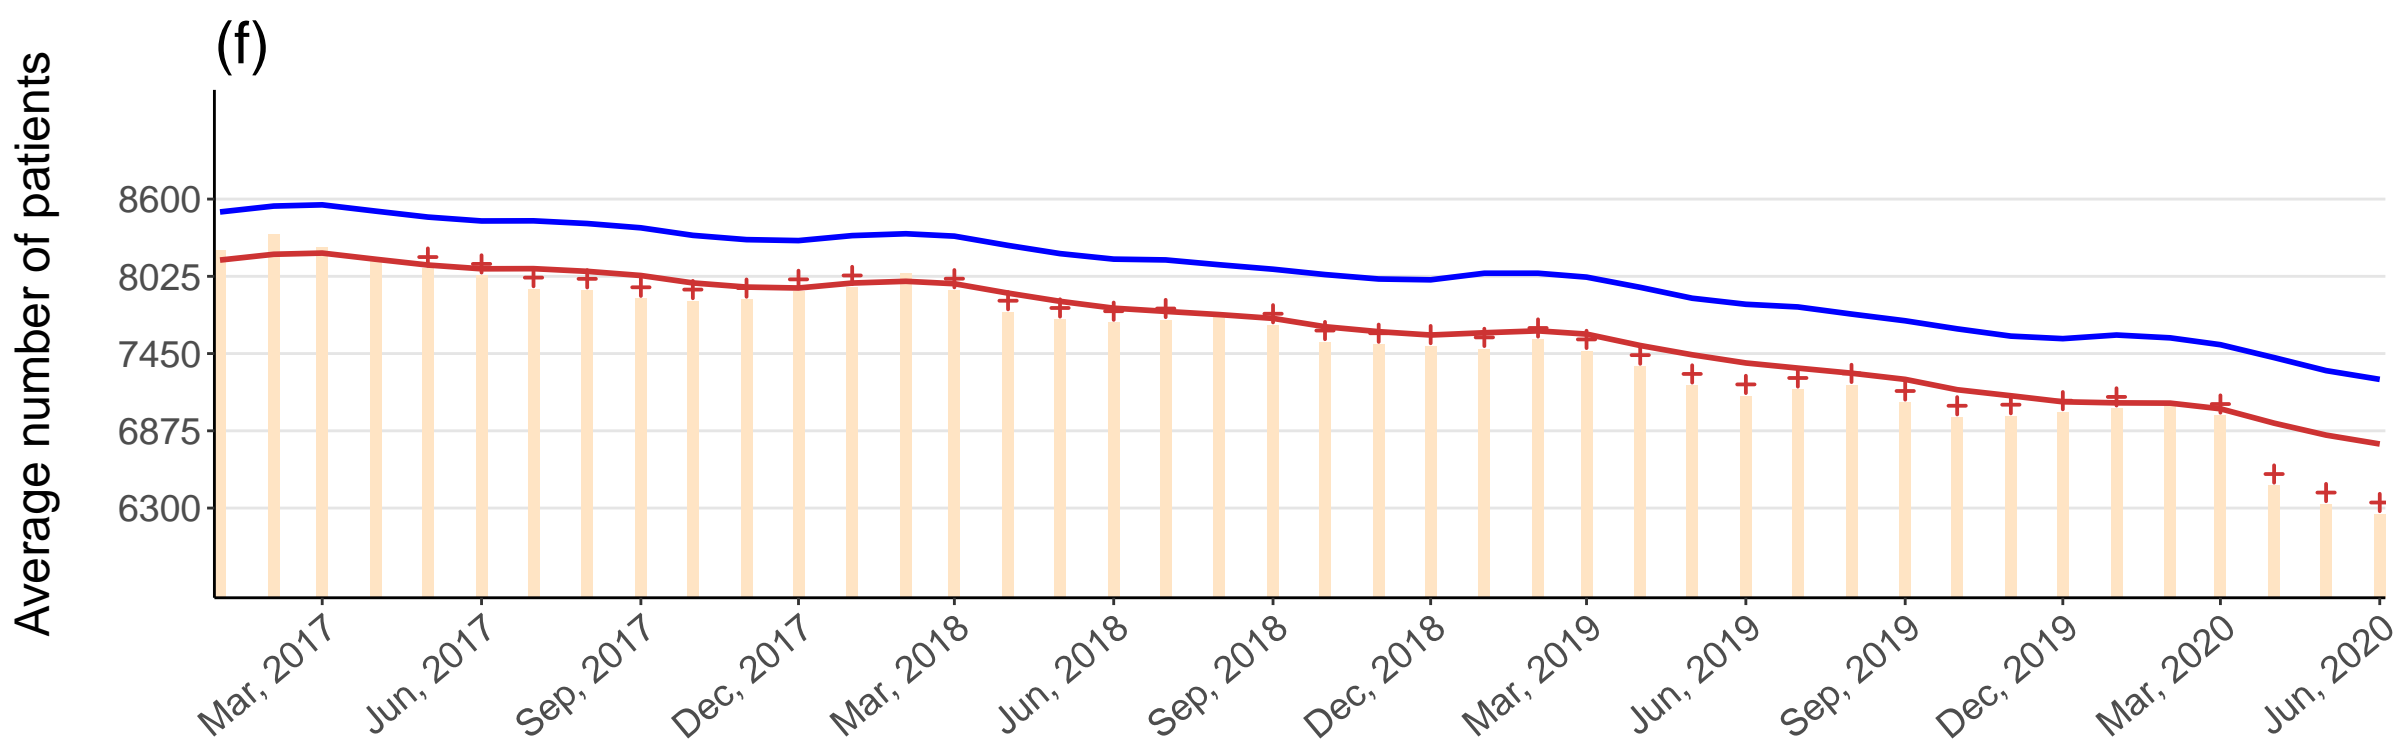

# Oita

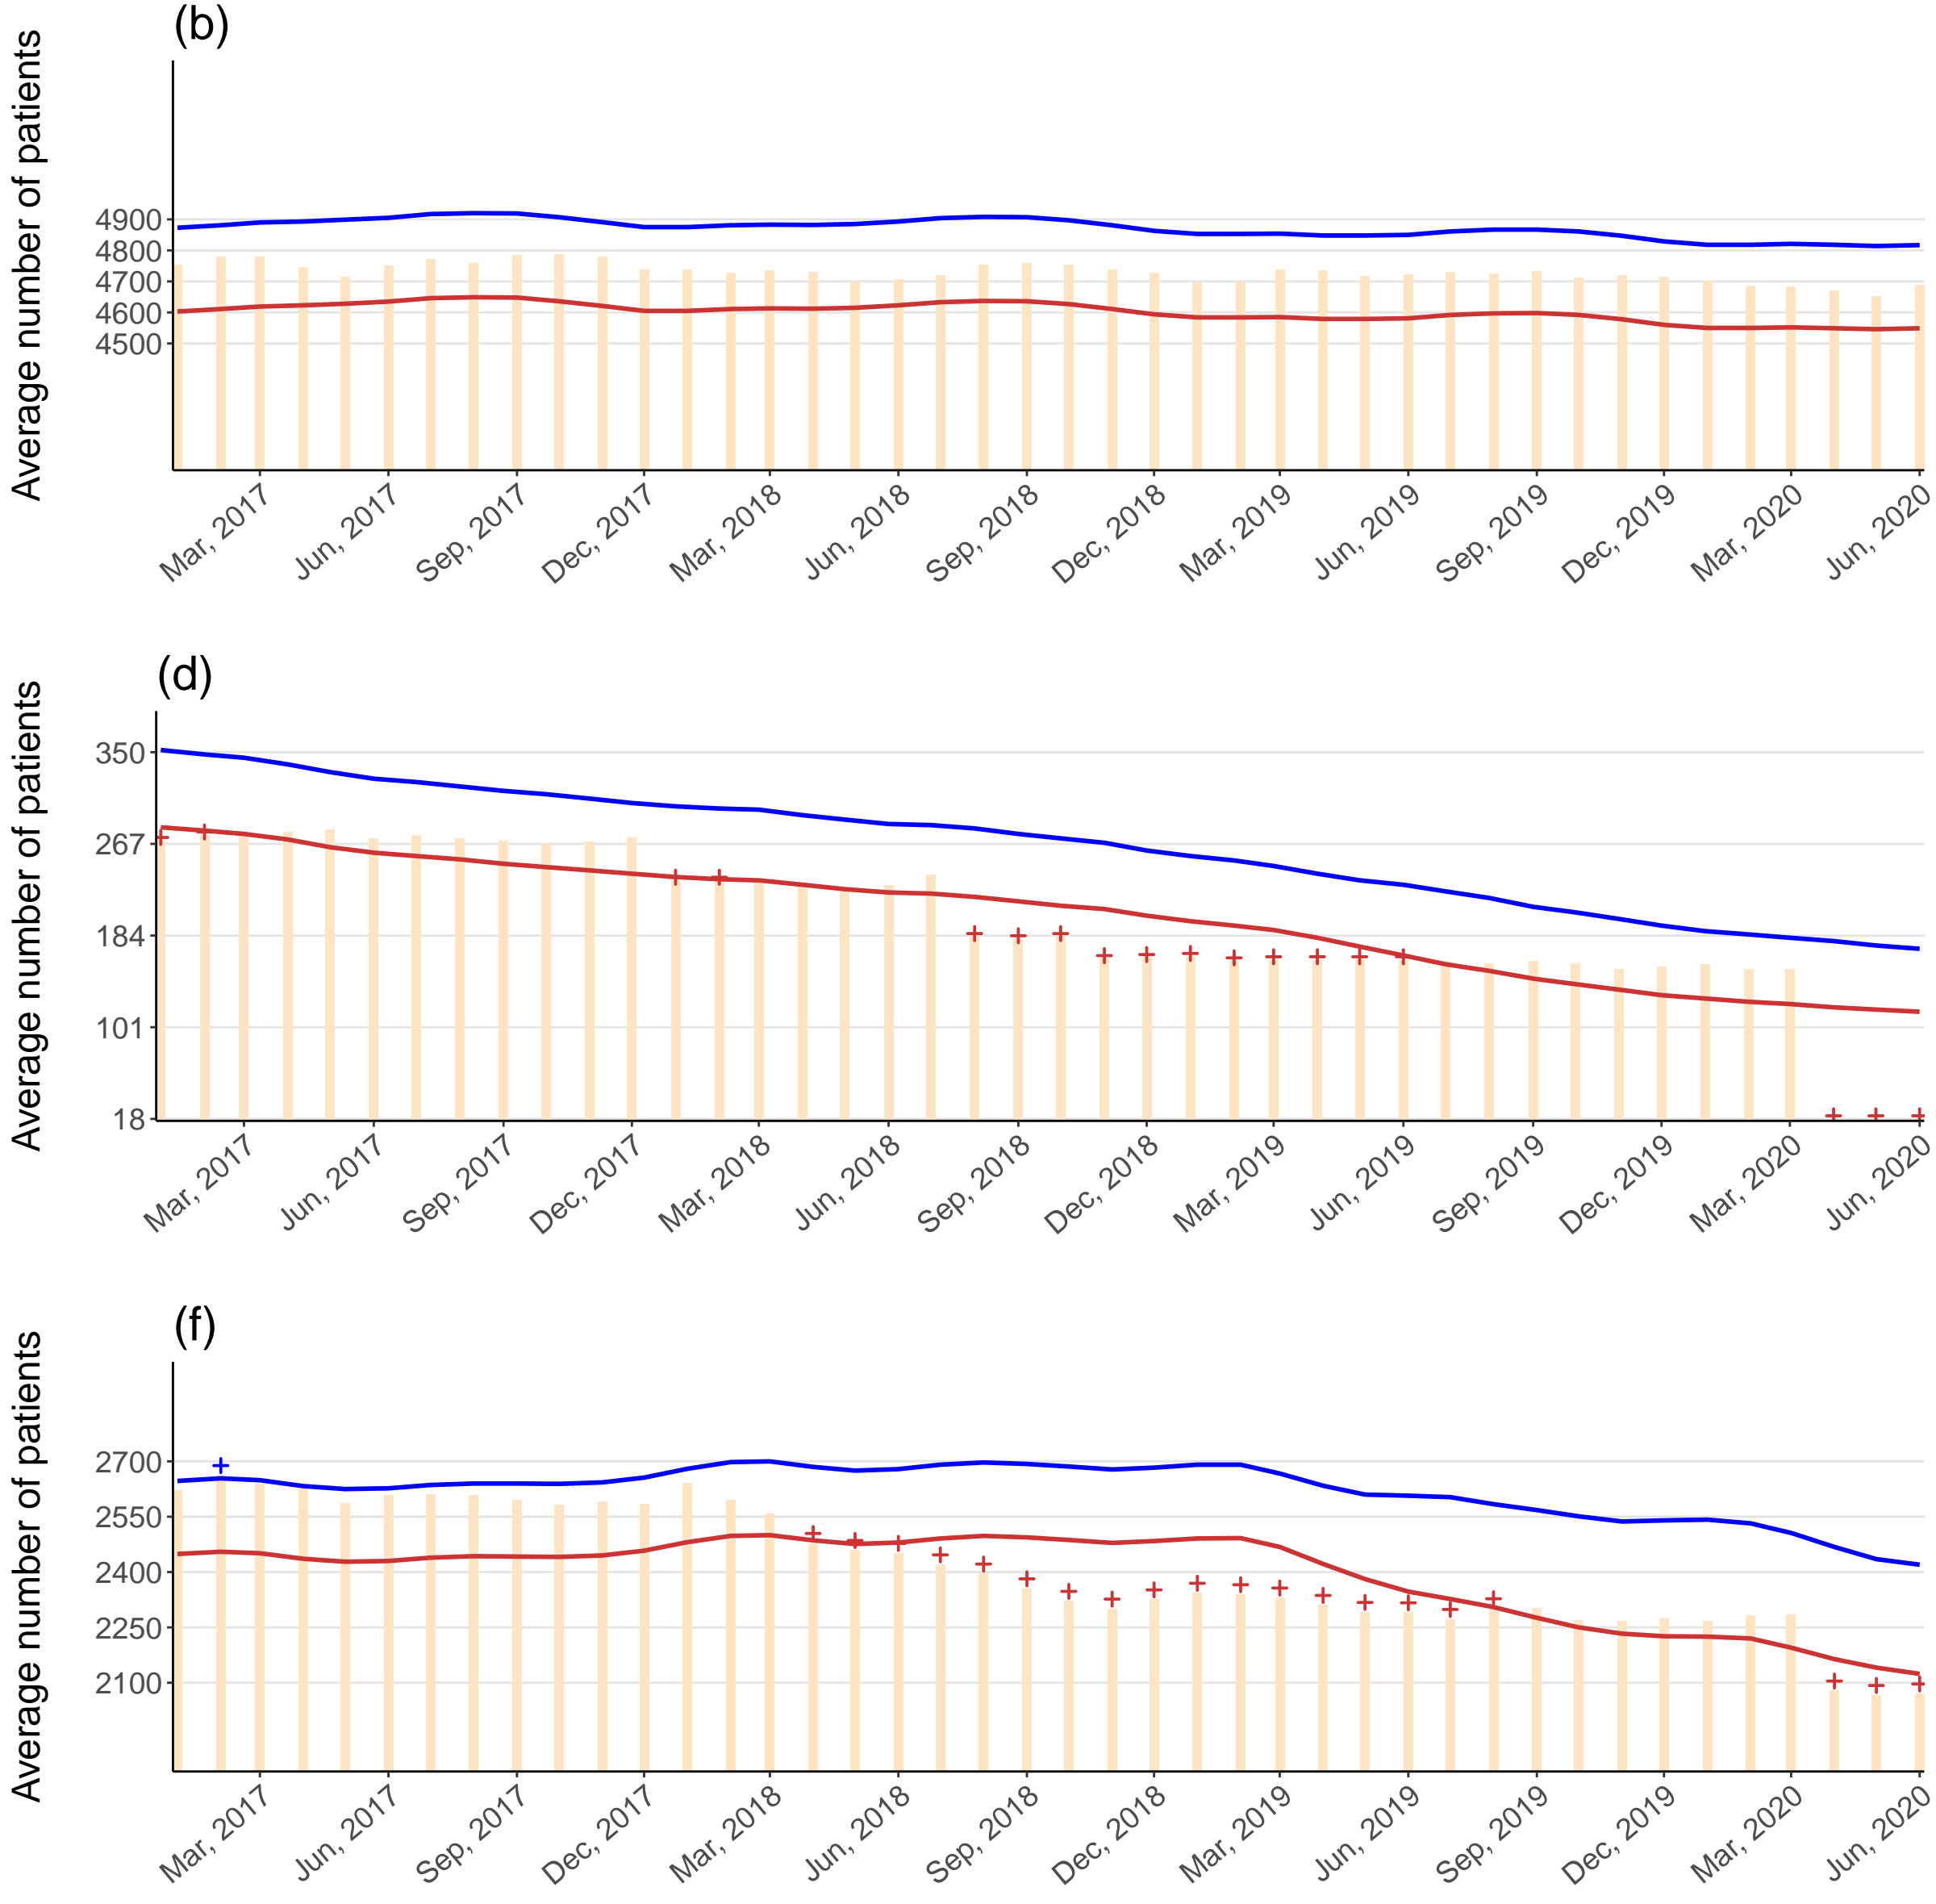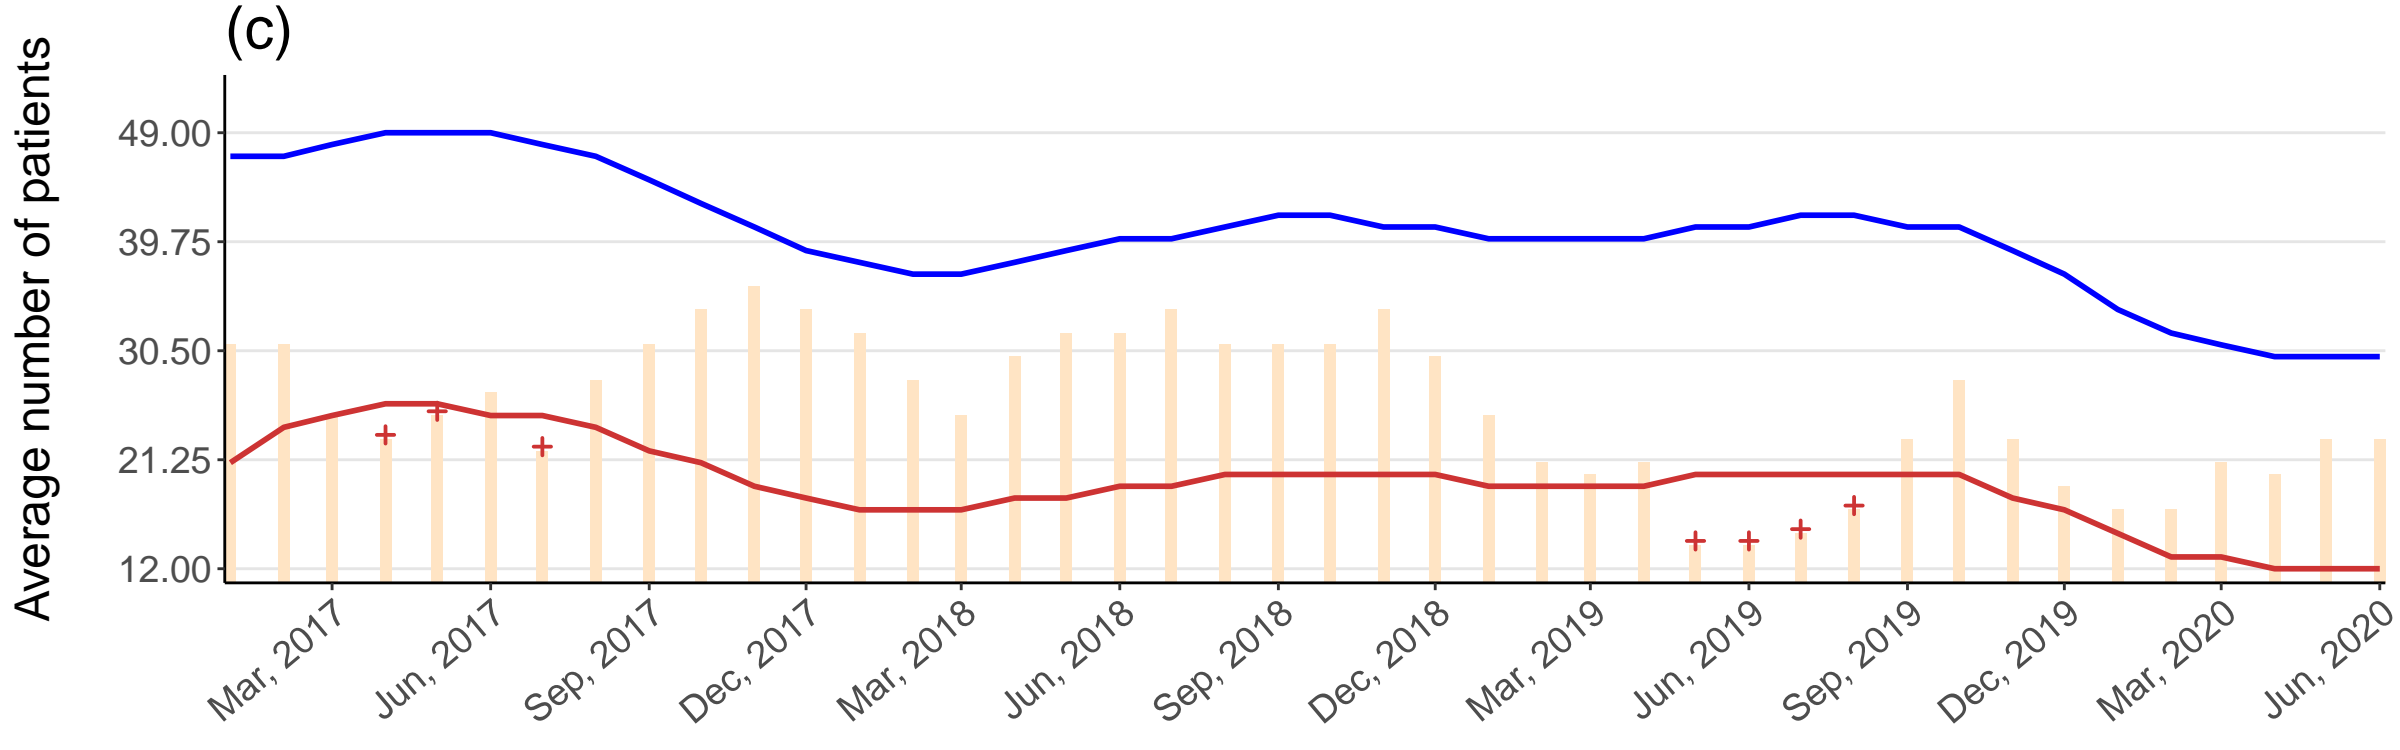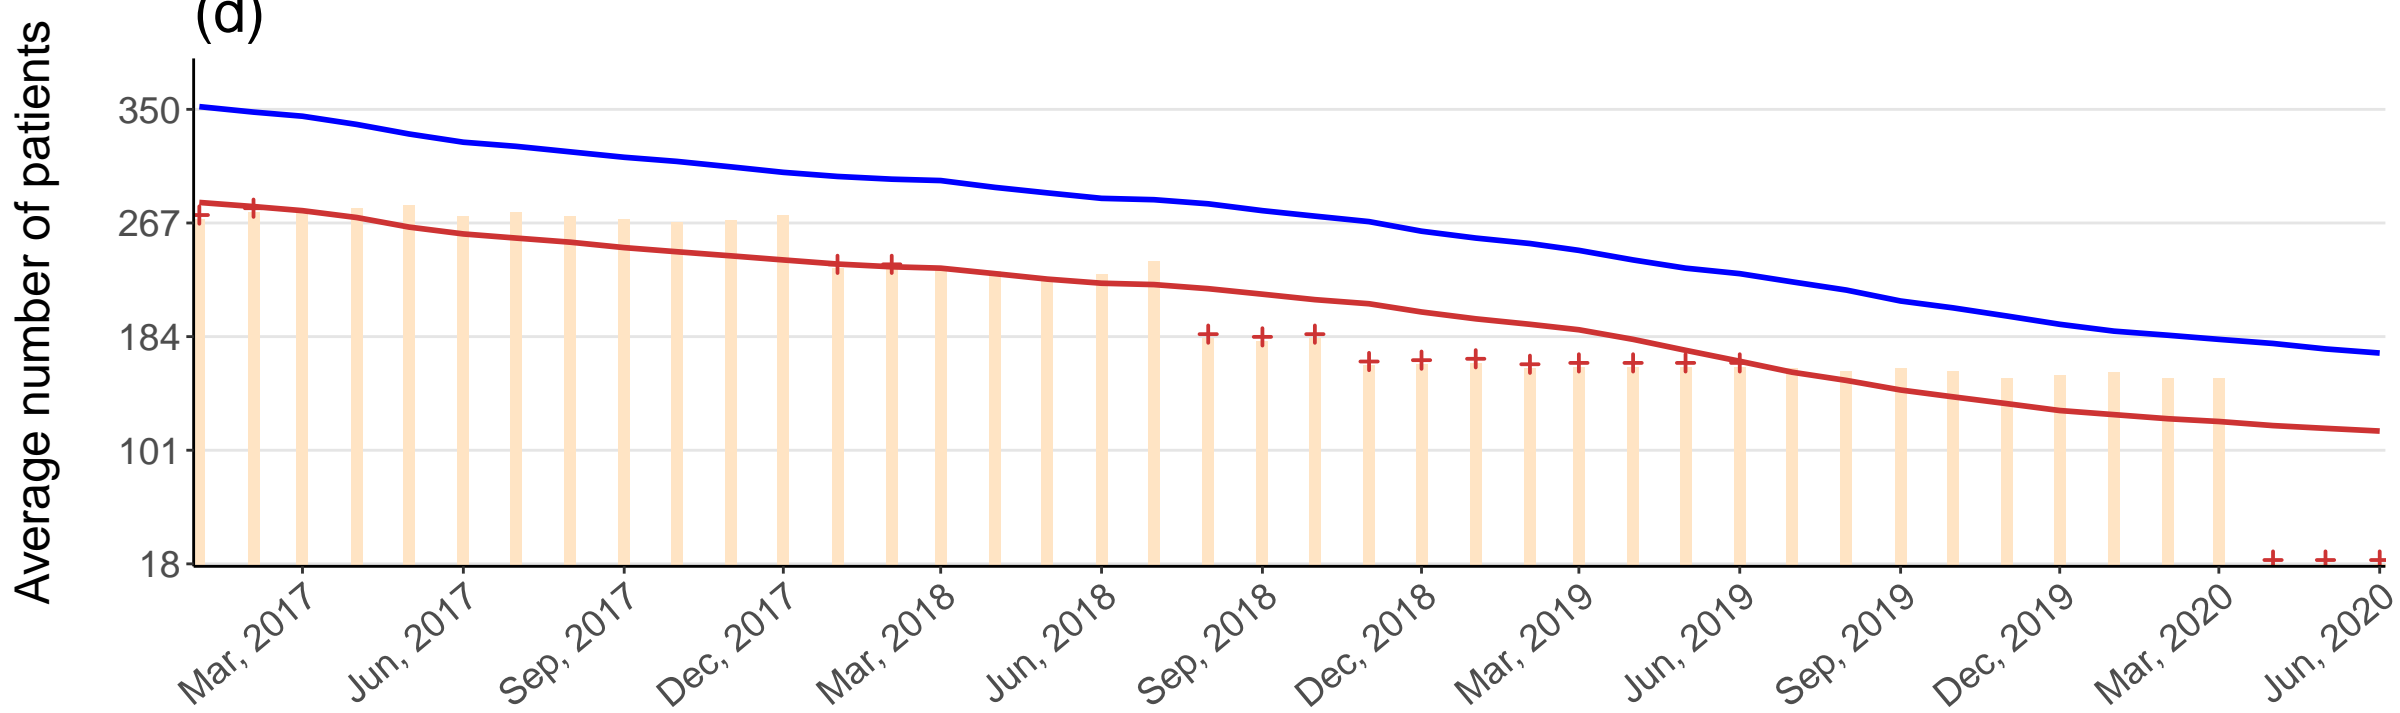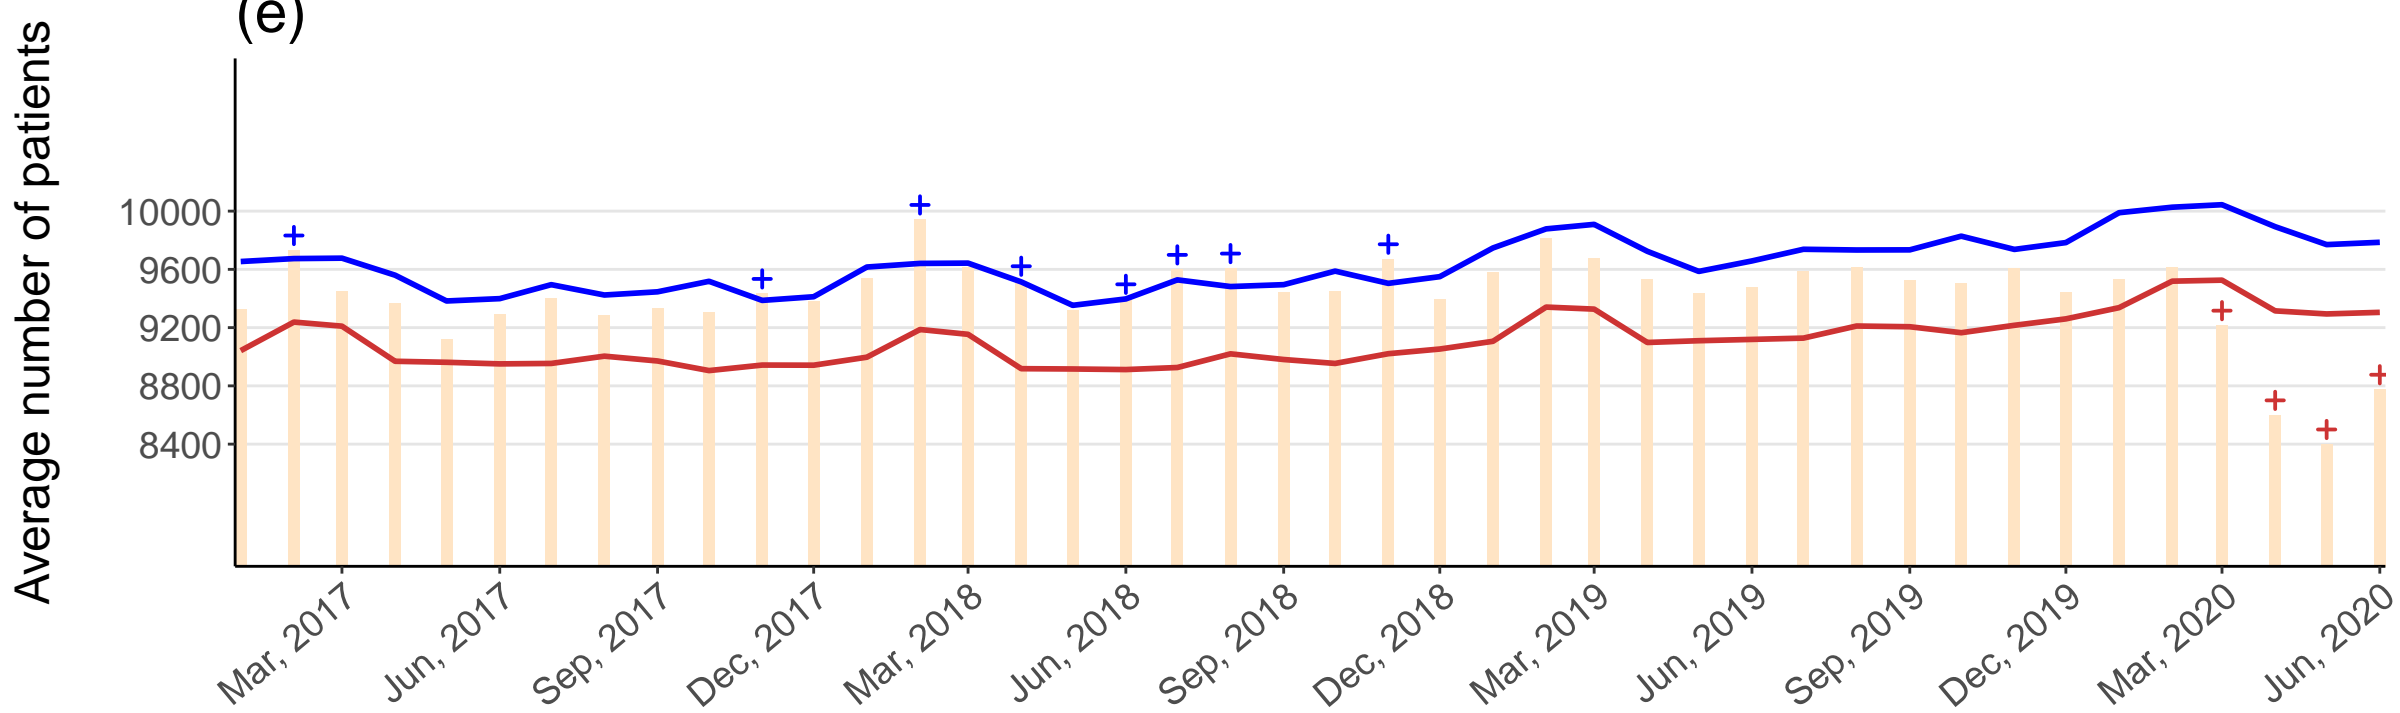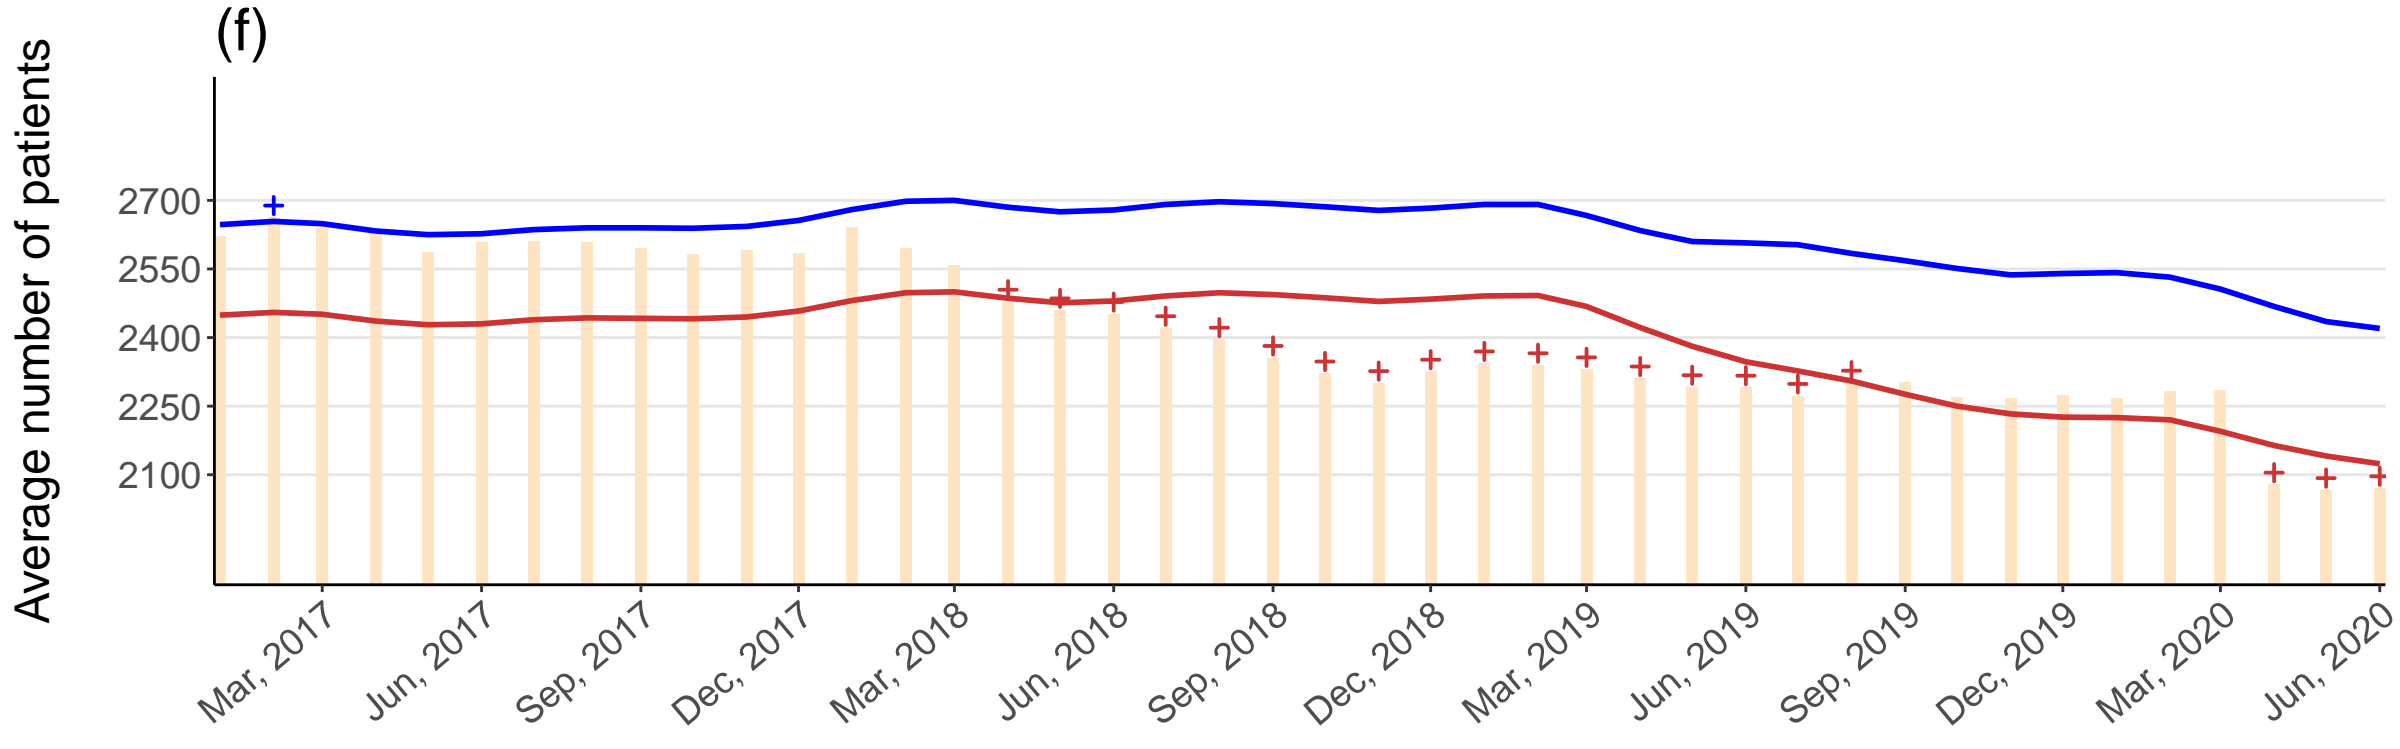

# Miyazaki

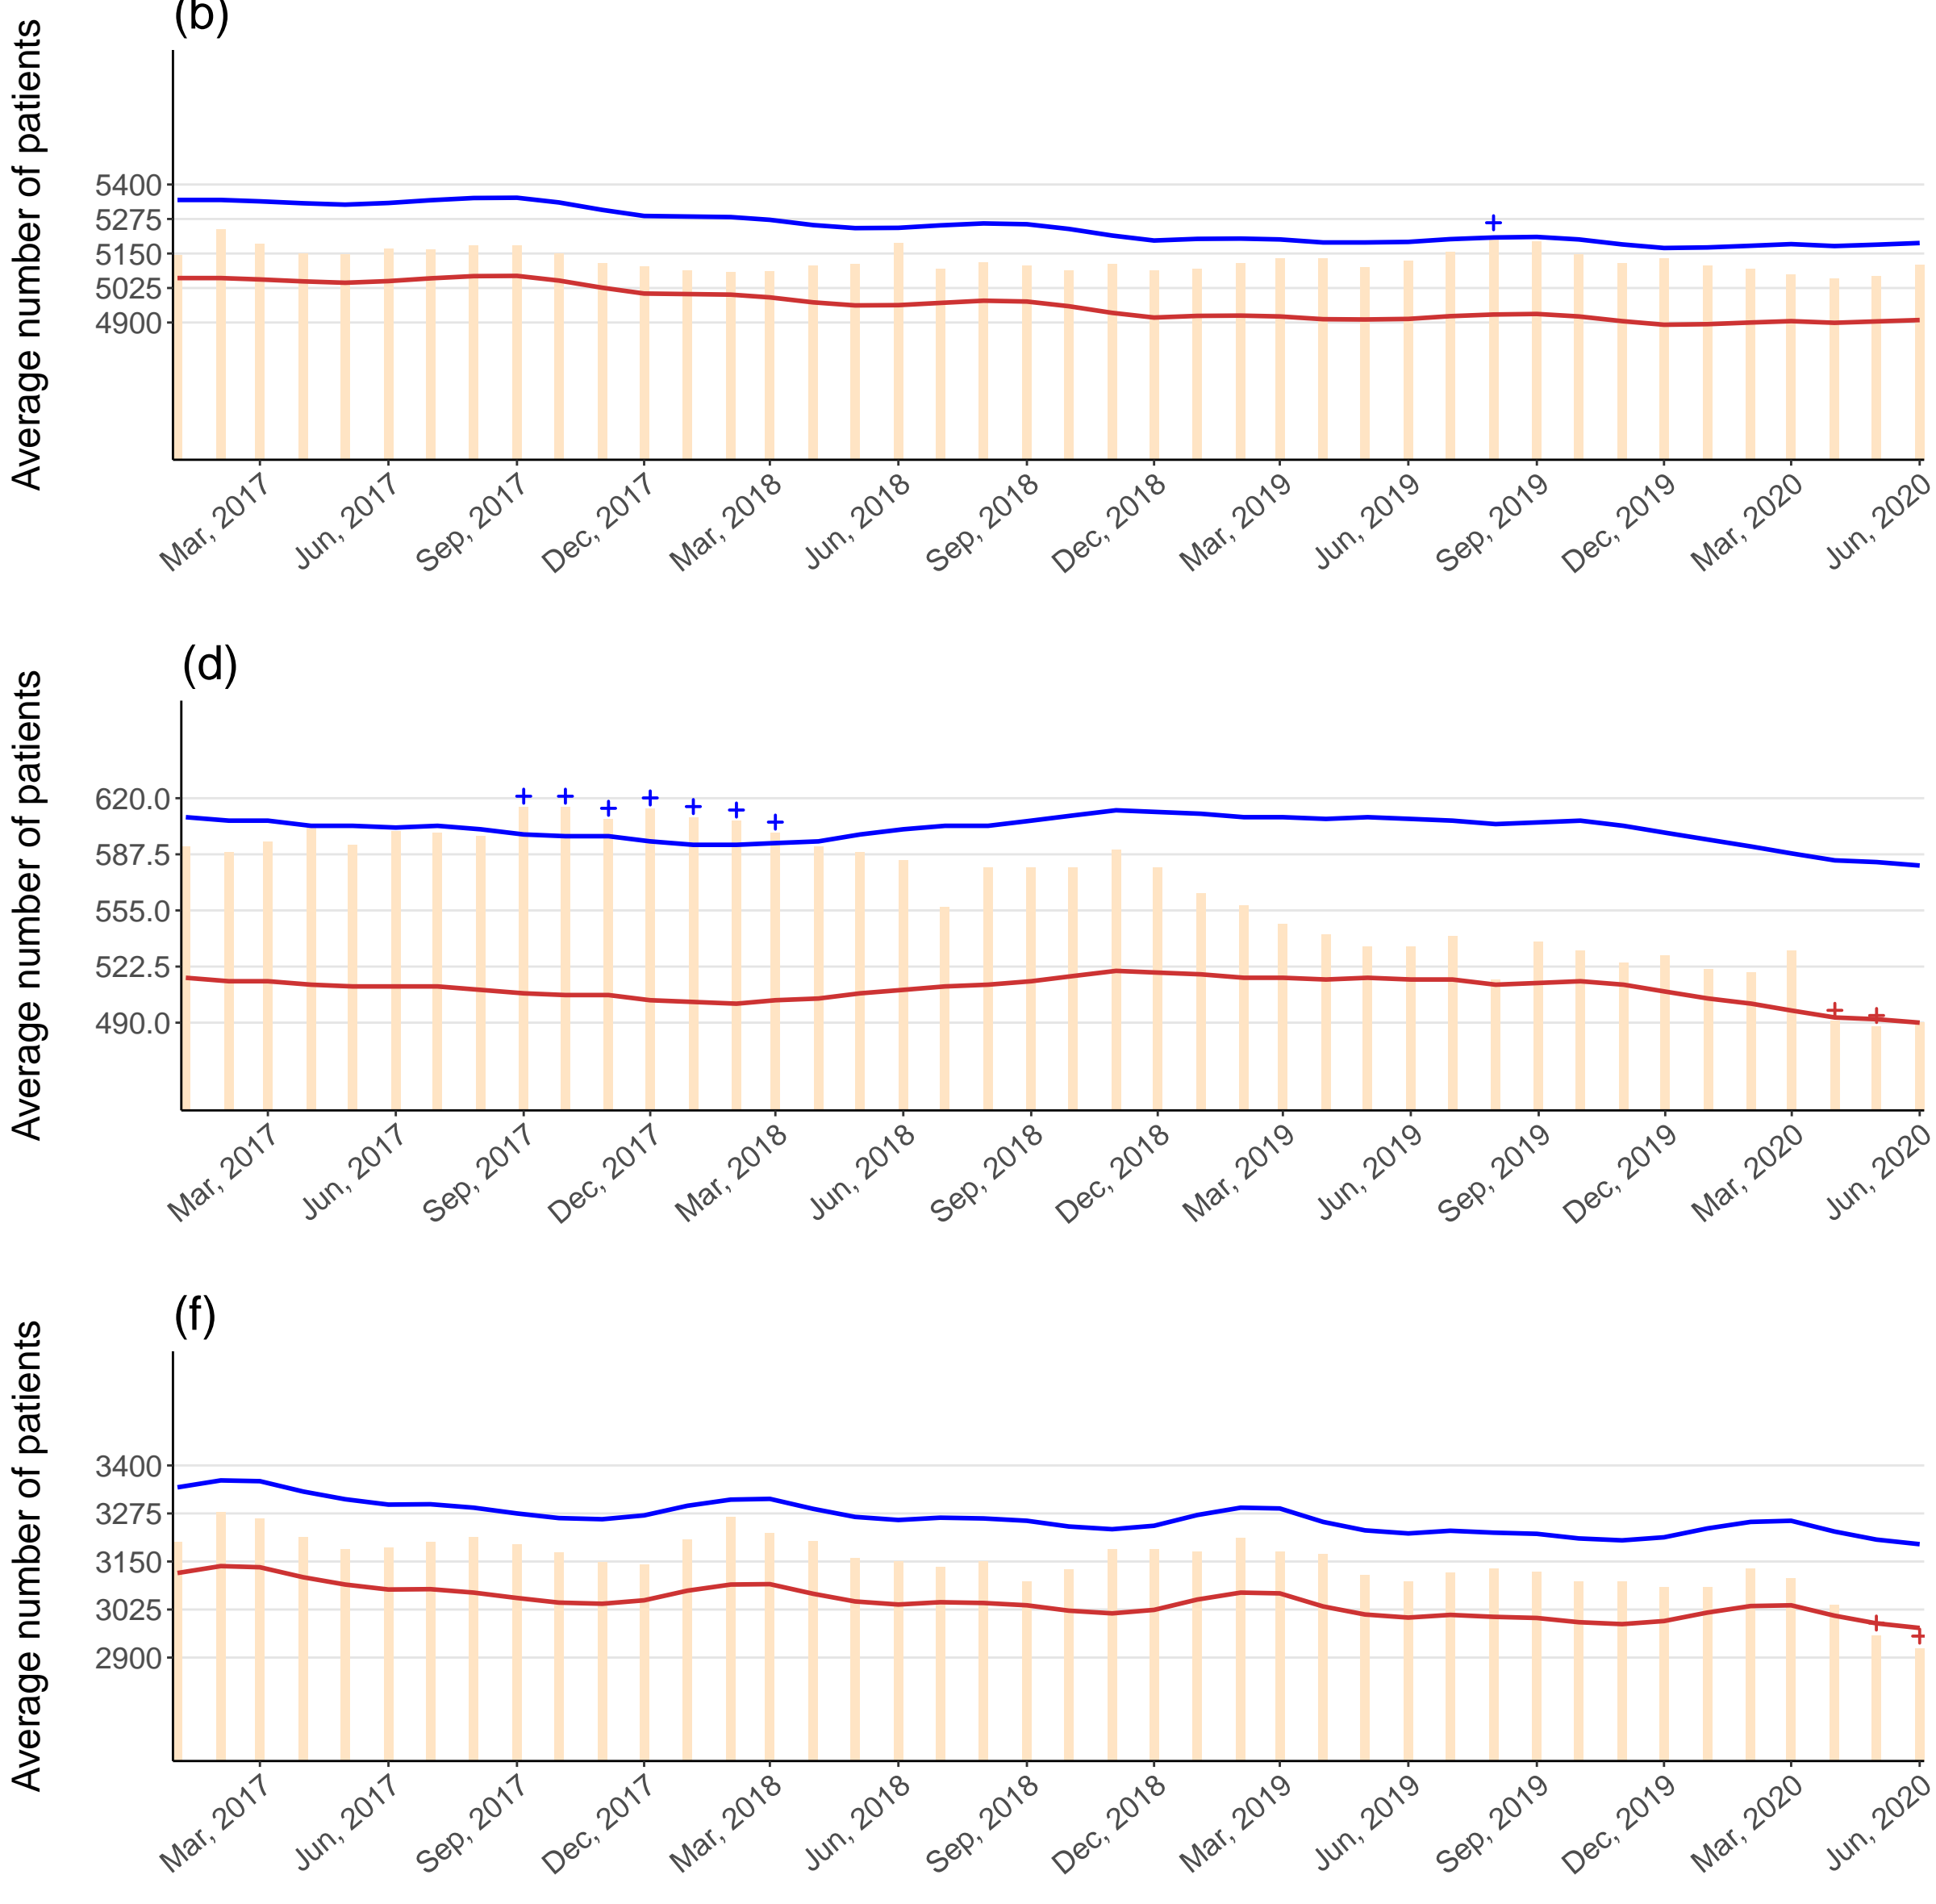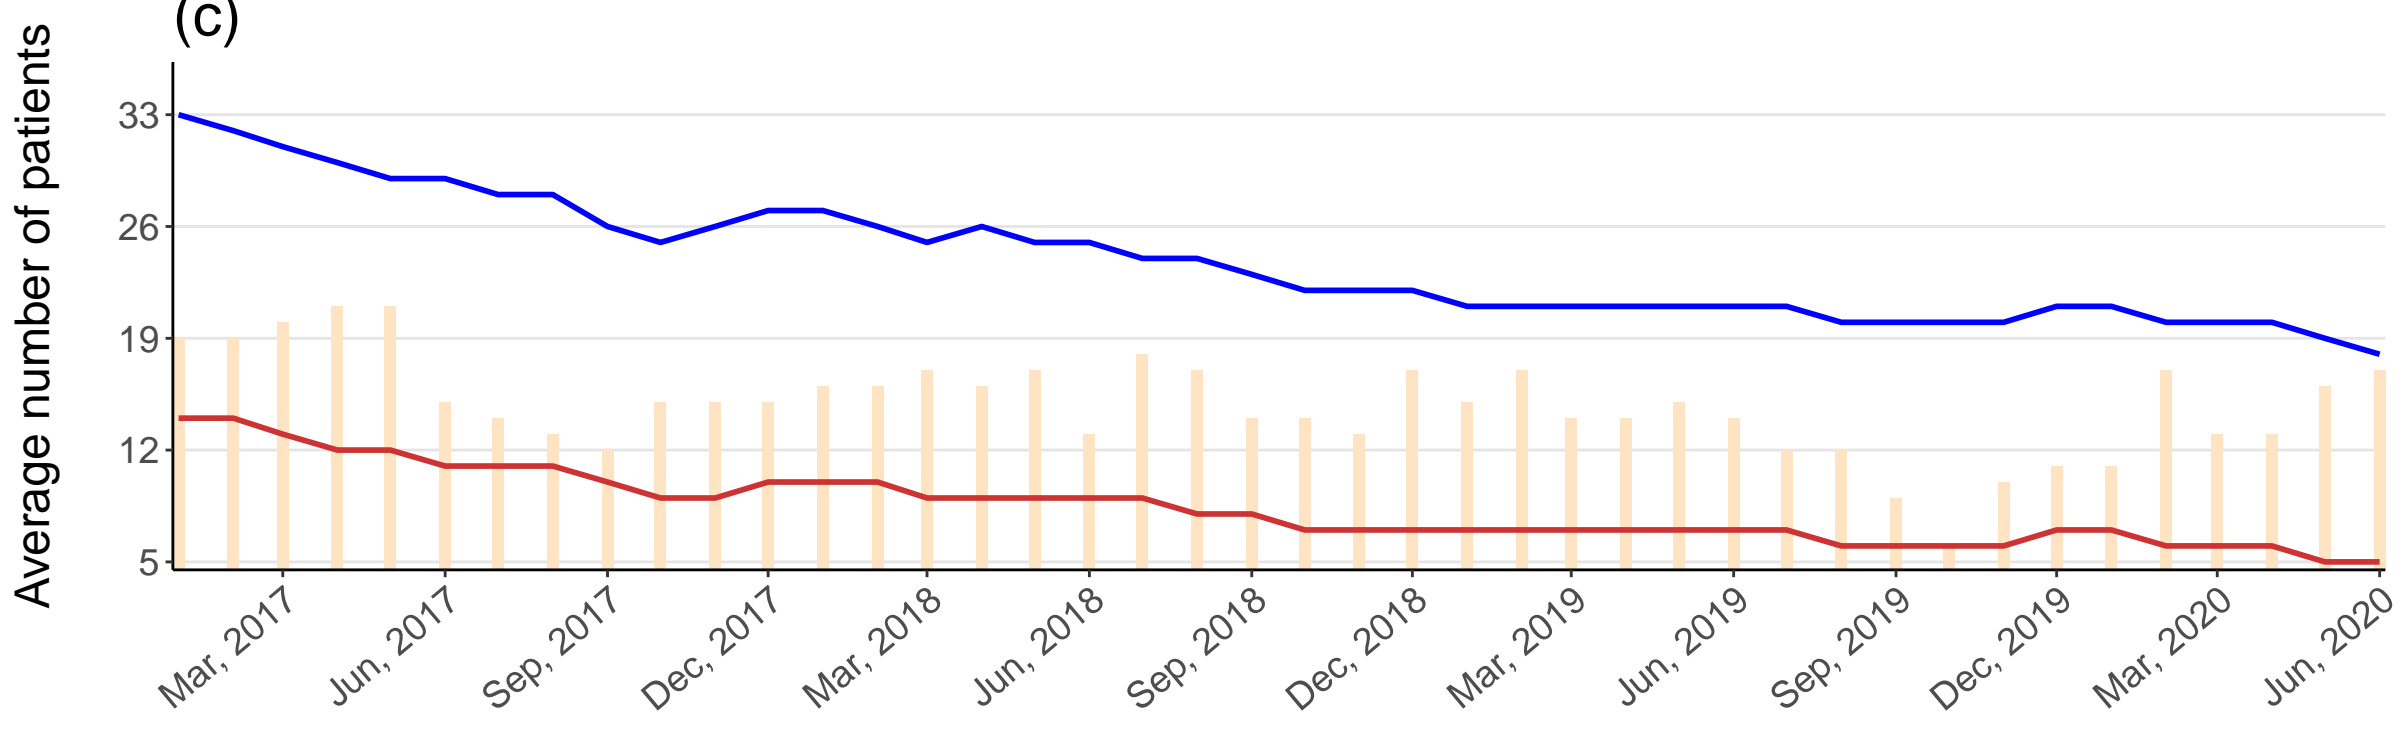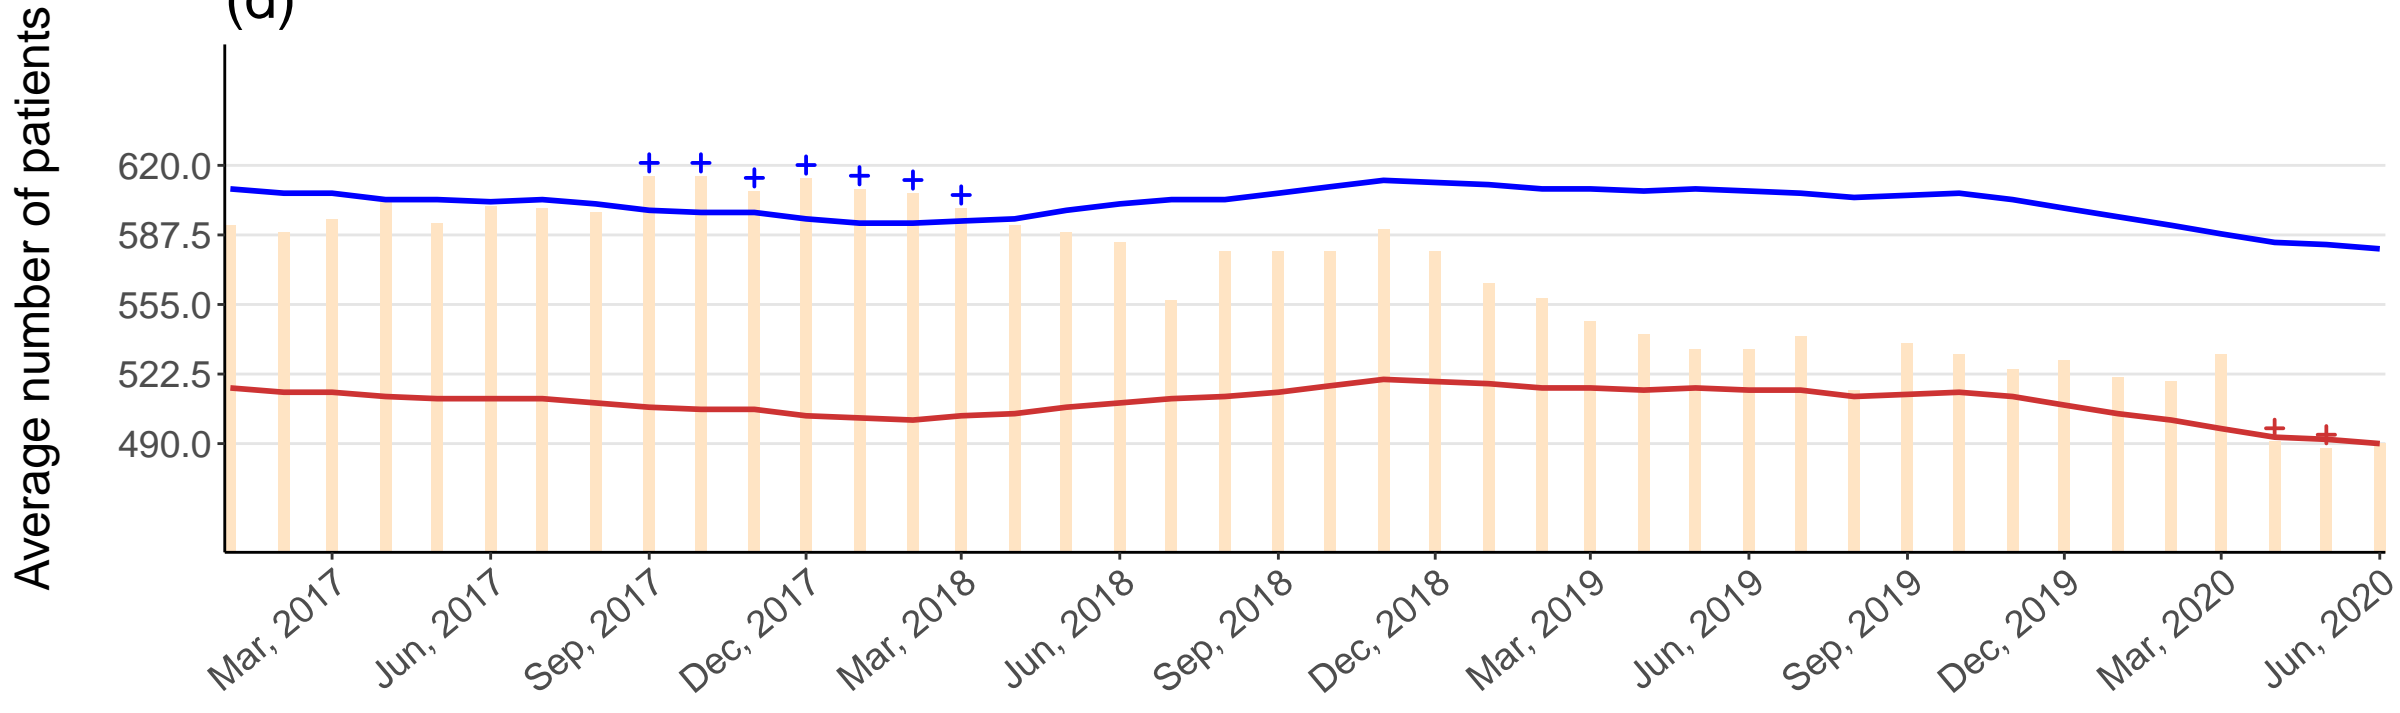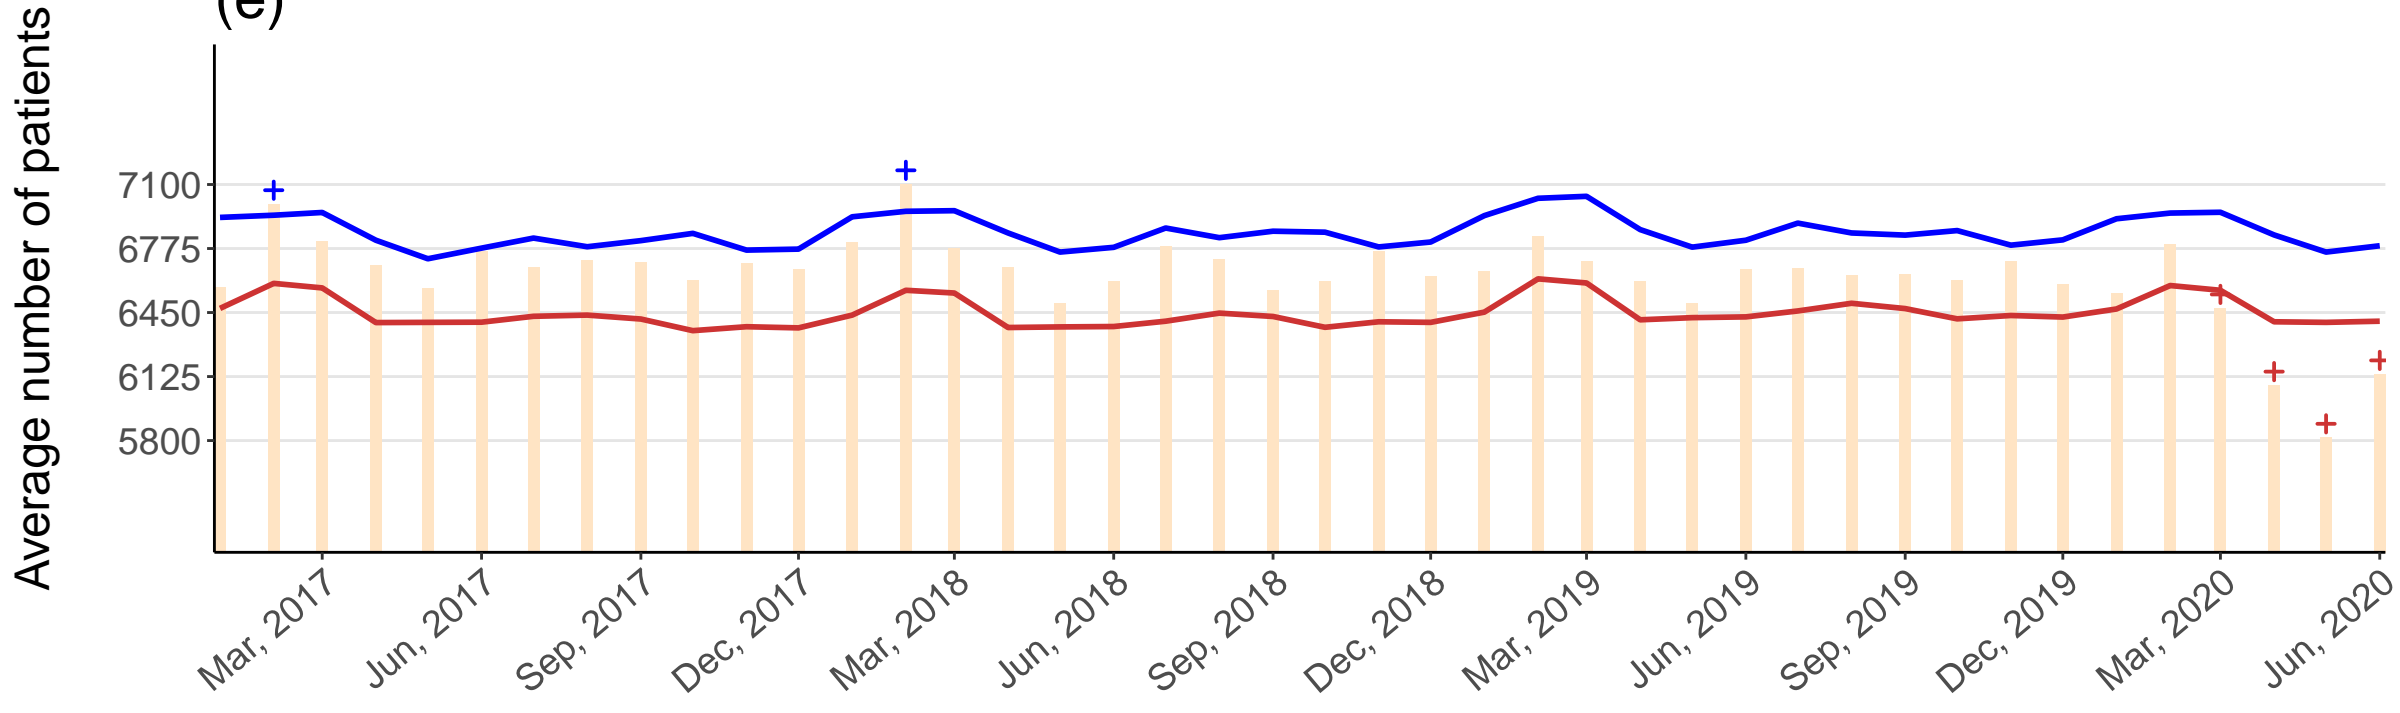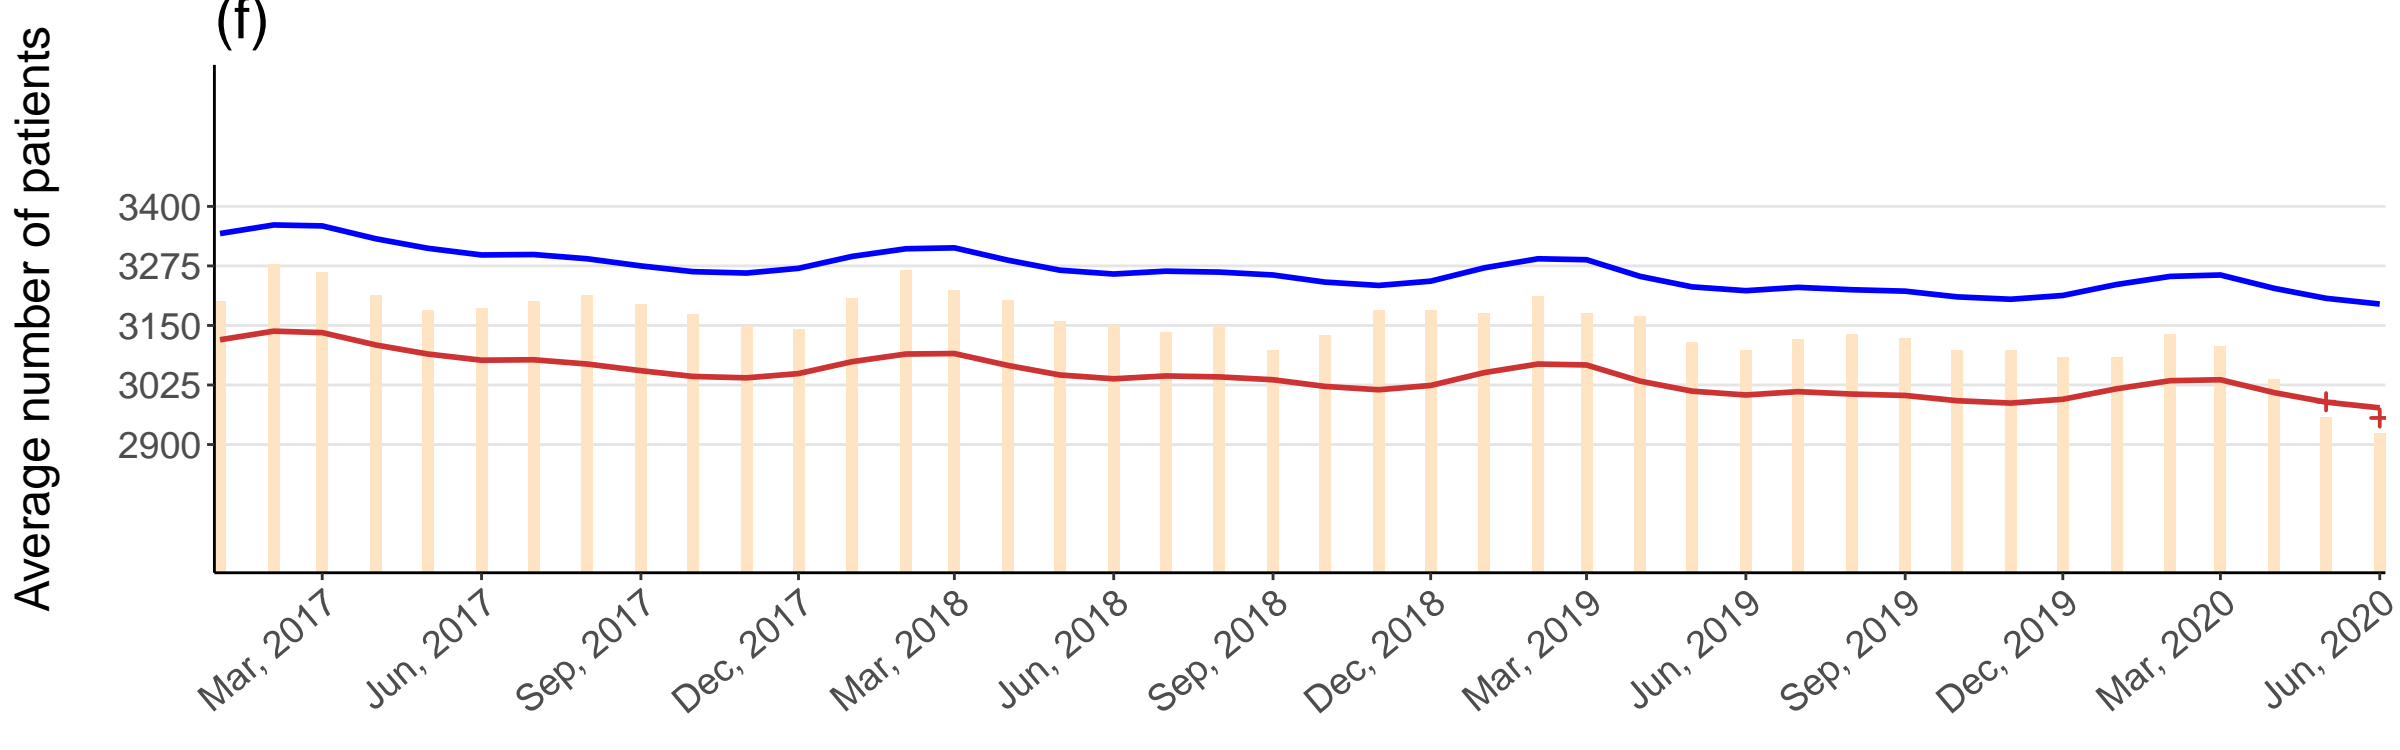

# Kagoshima

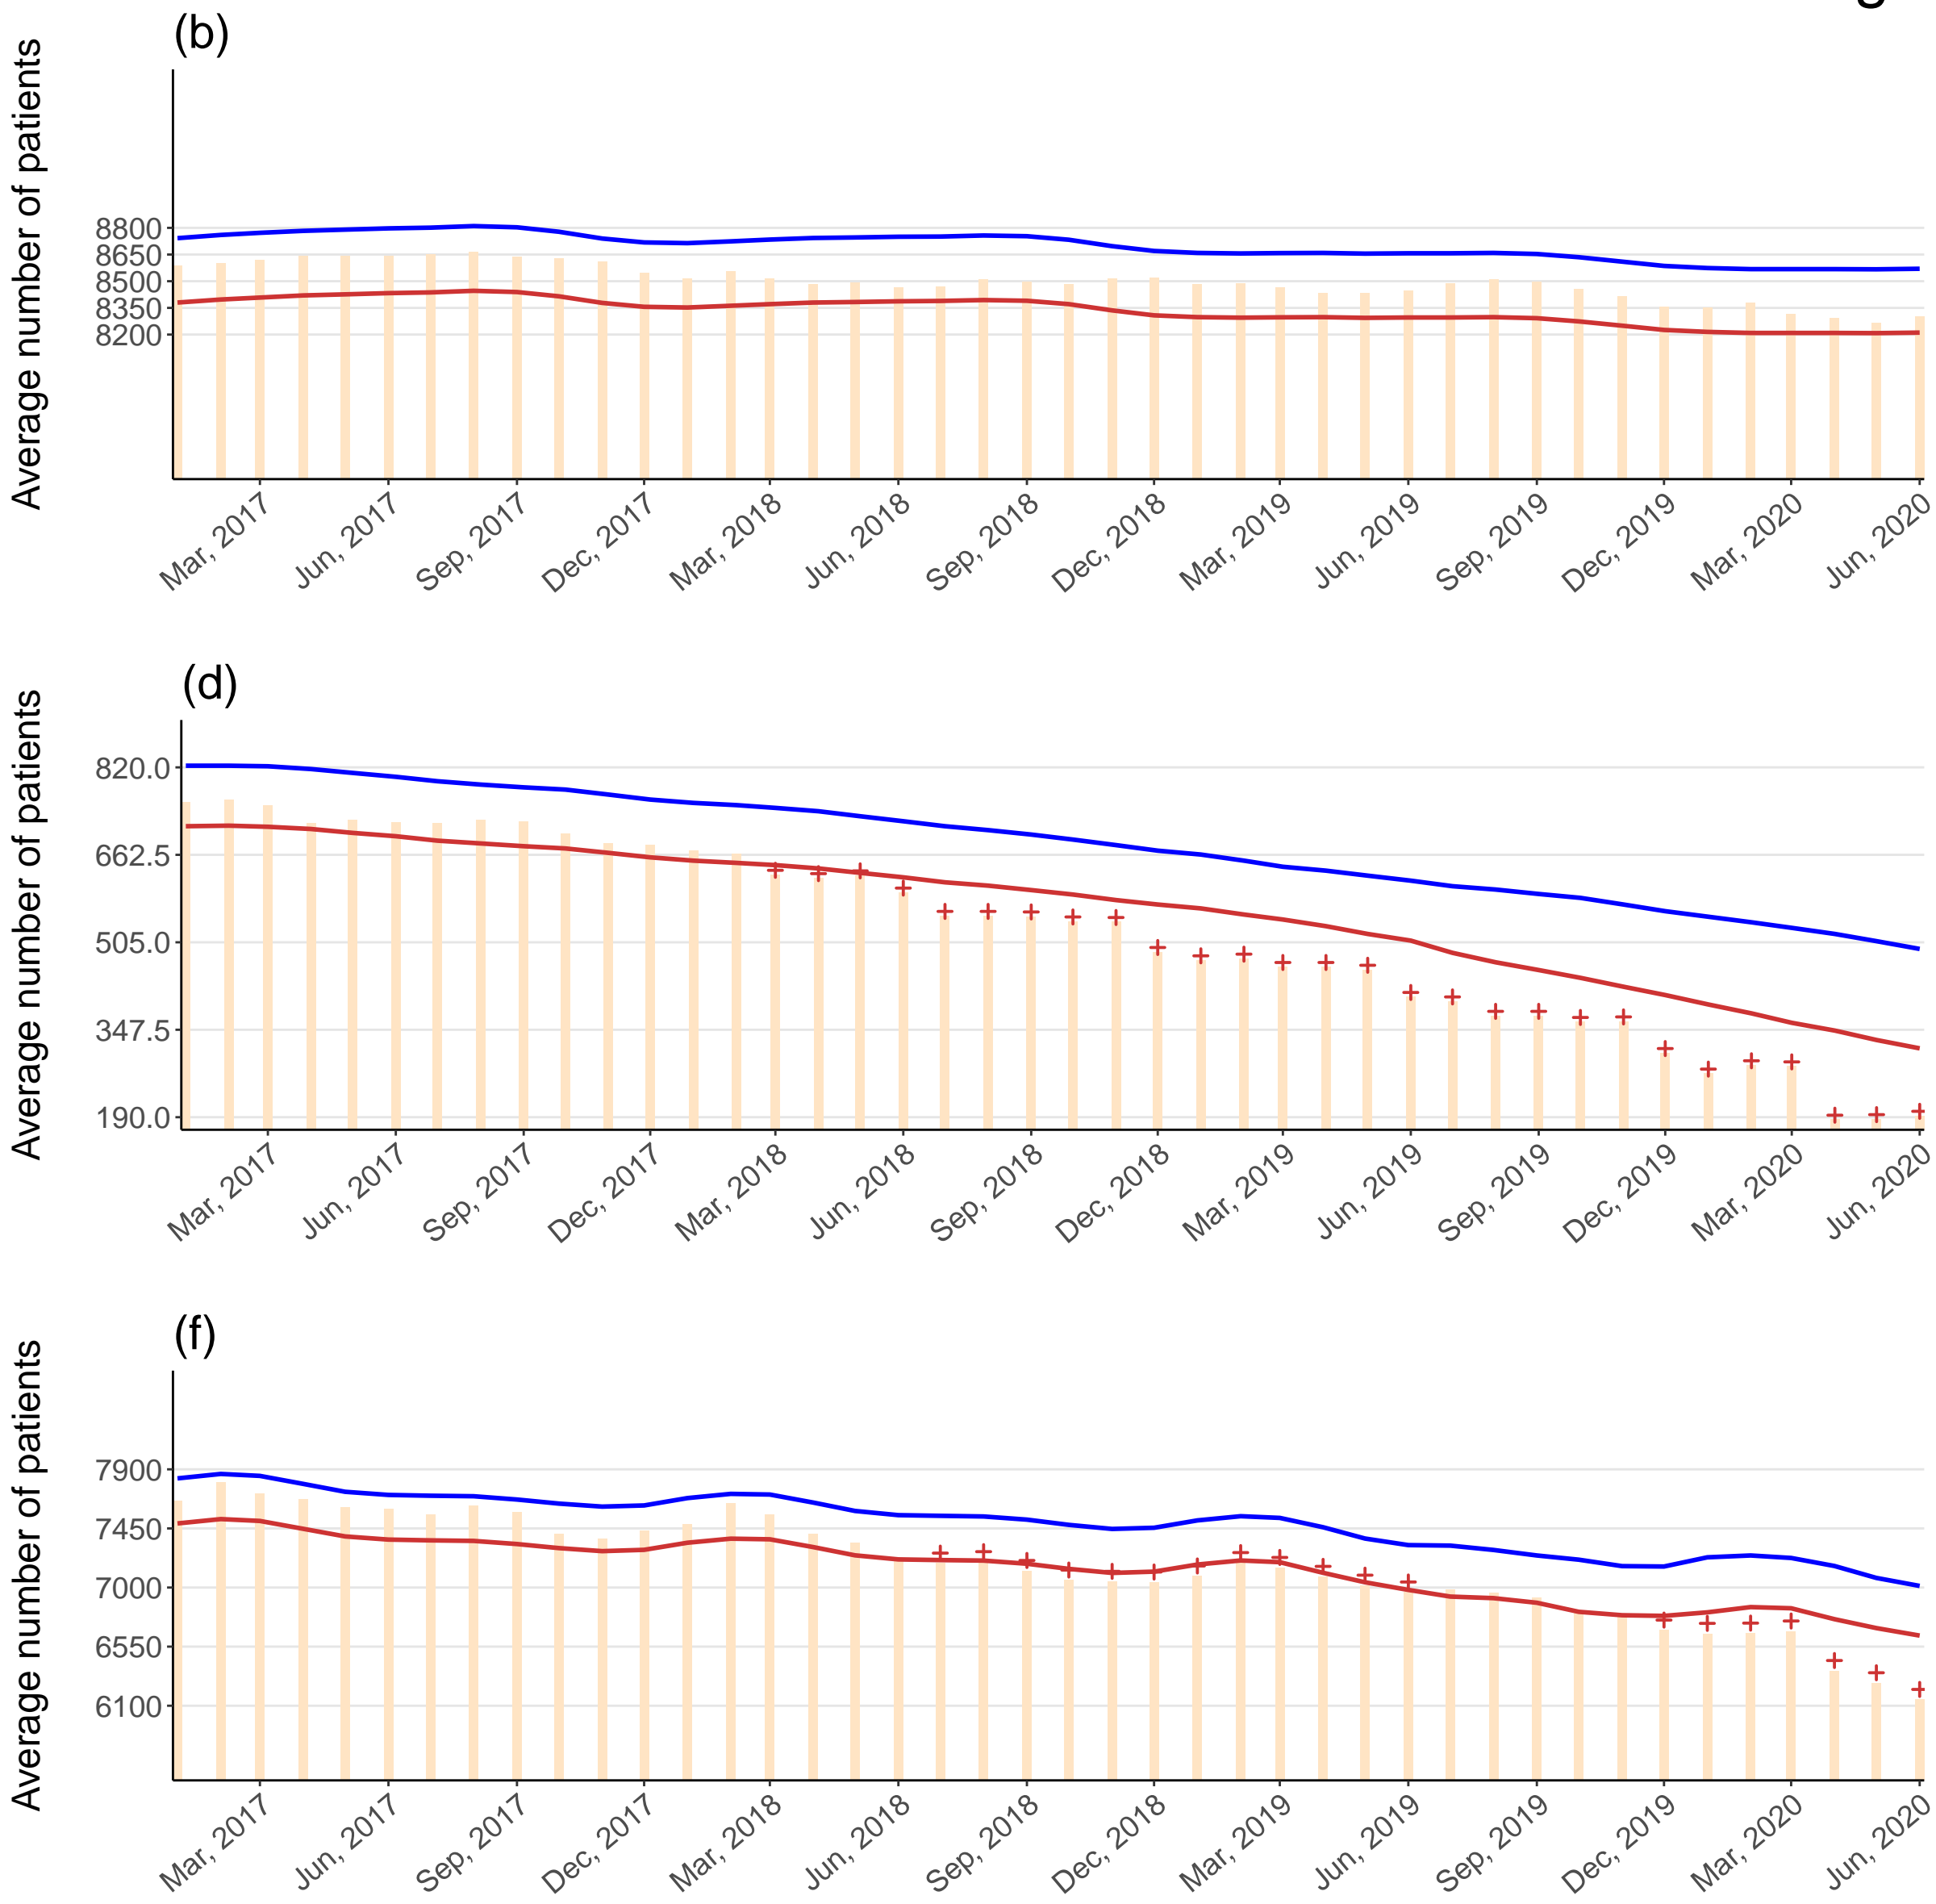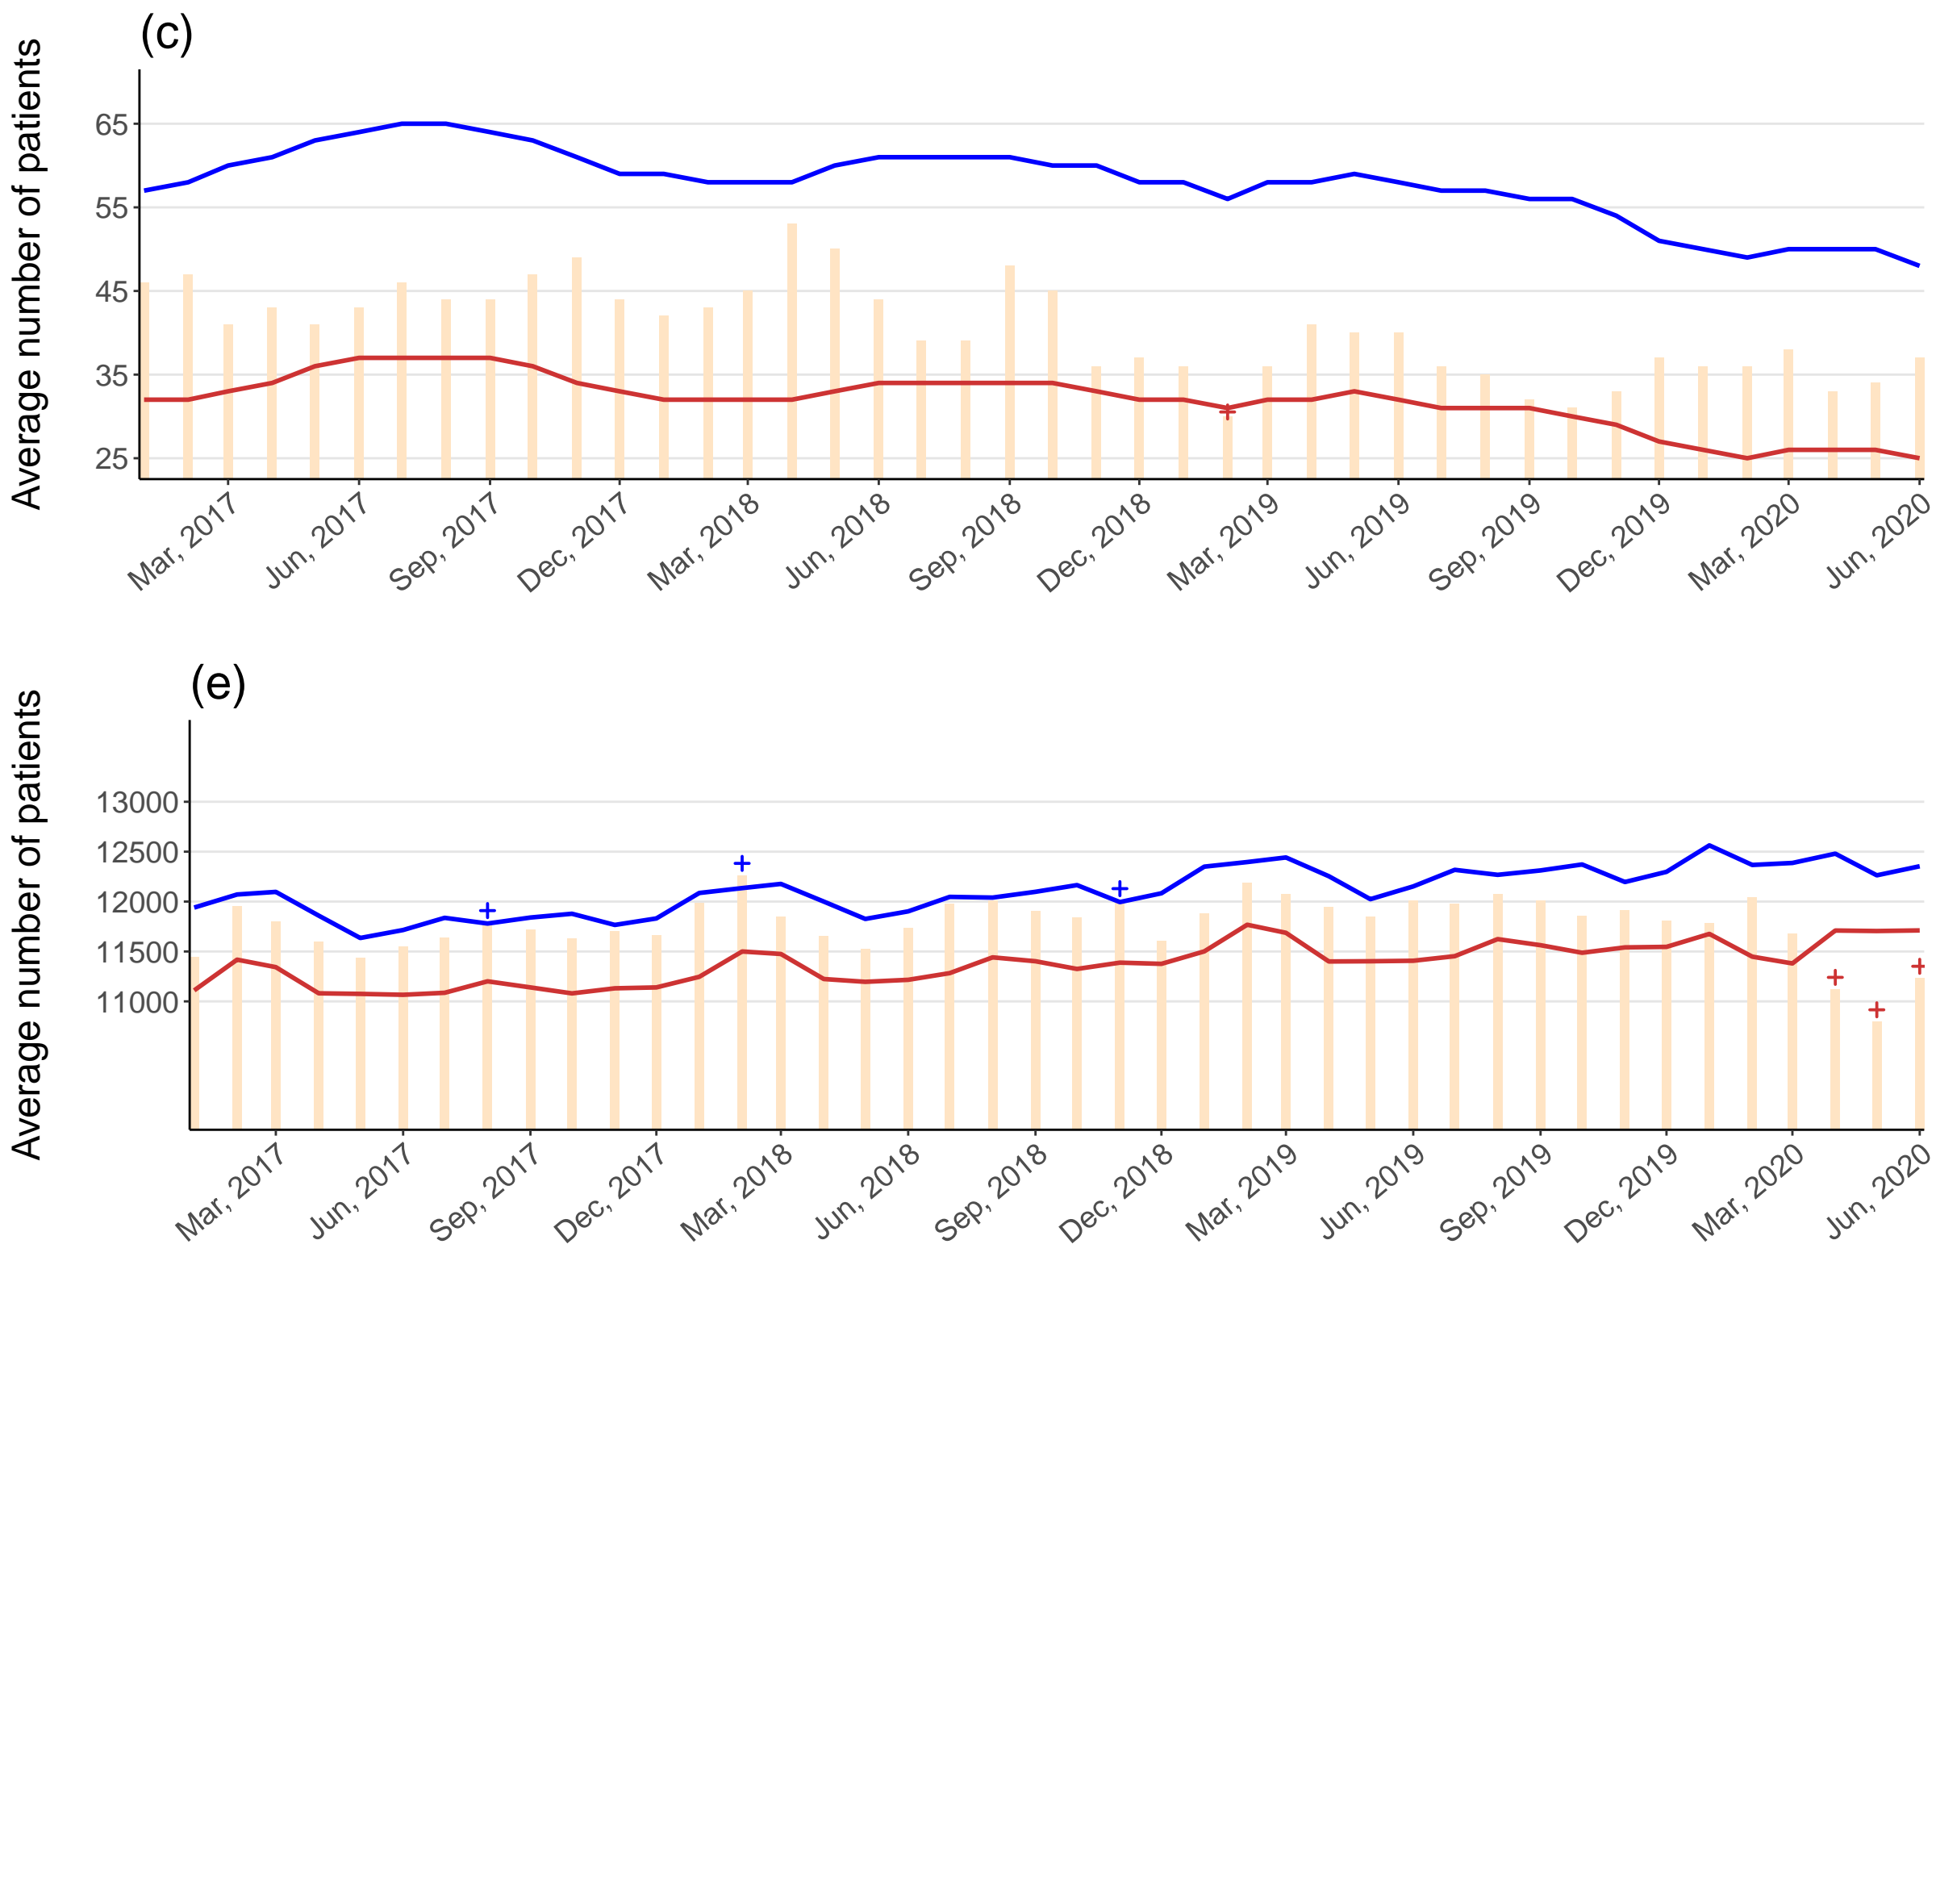

# Okinawa

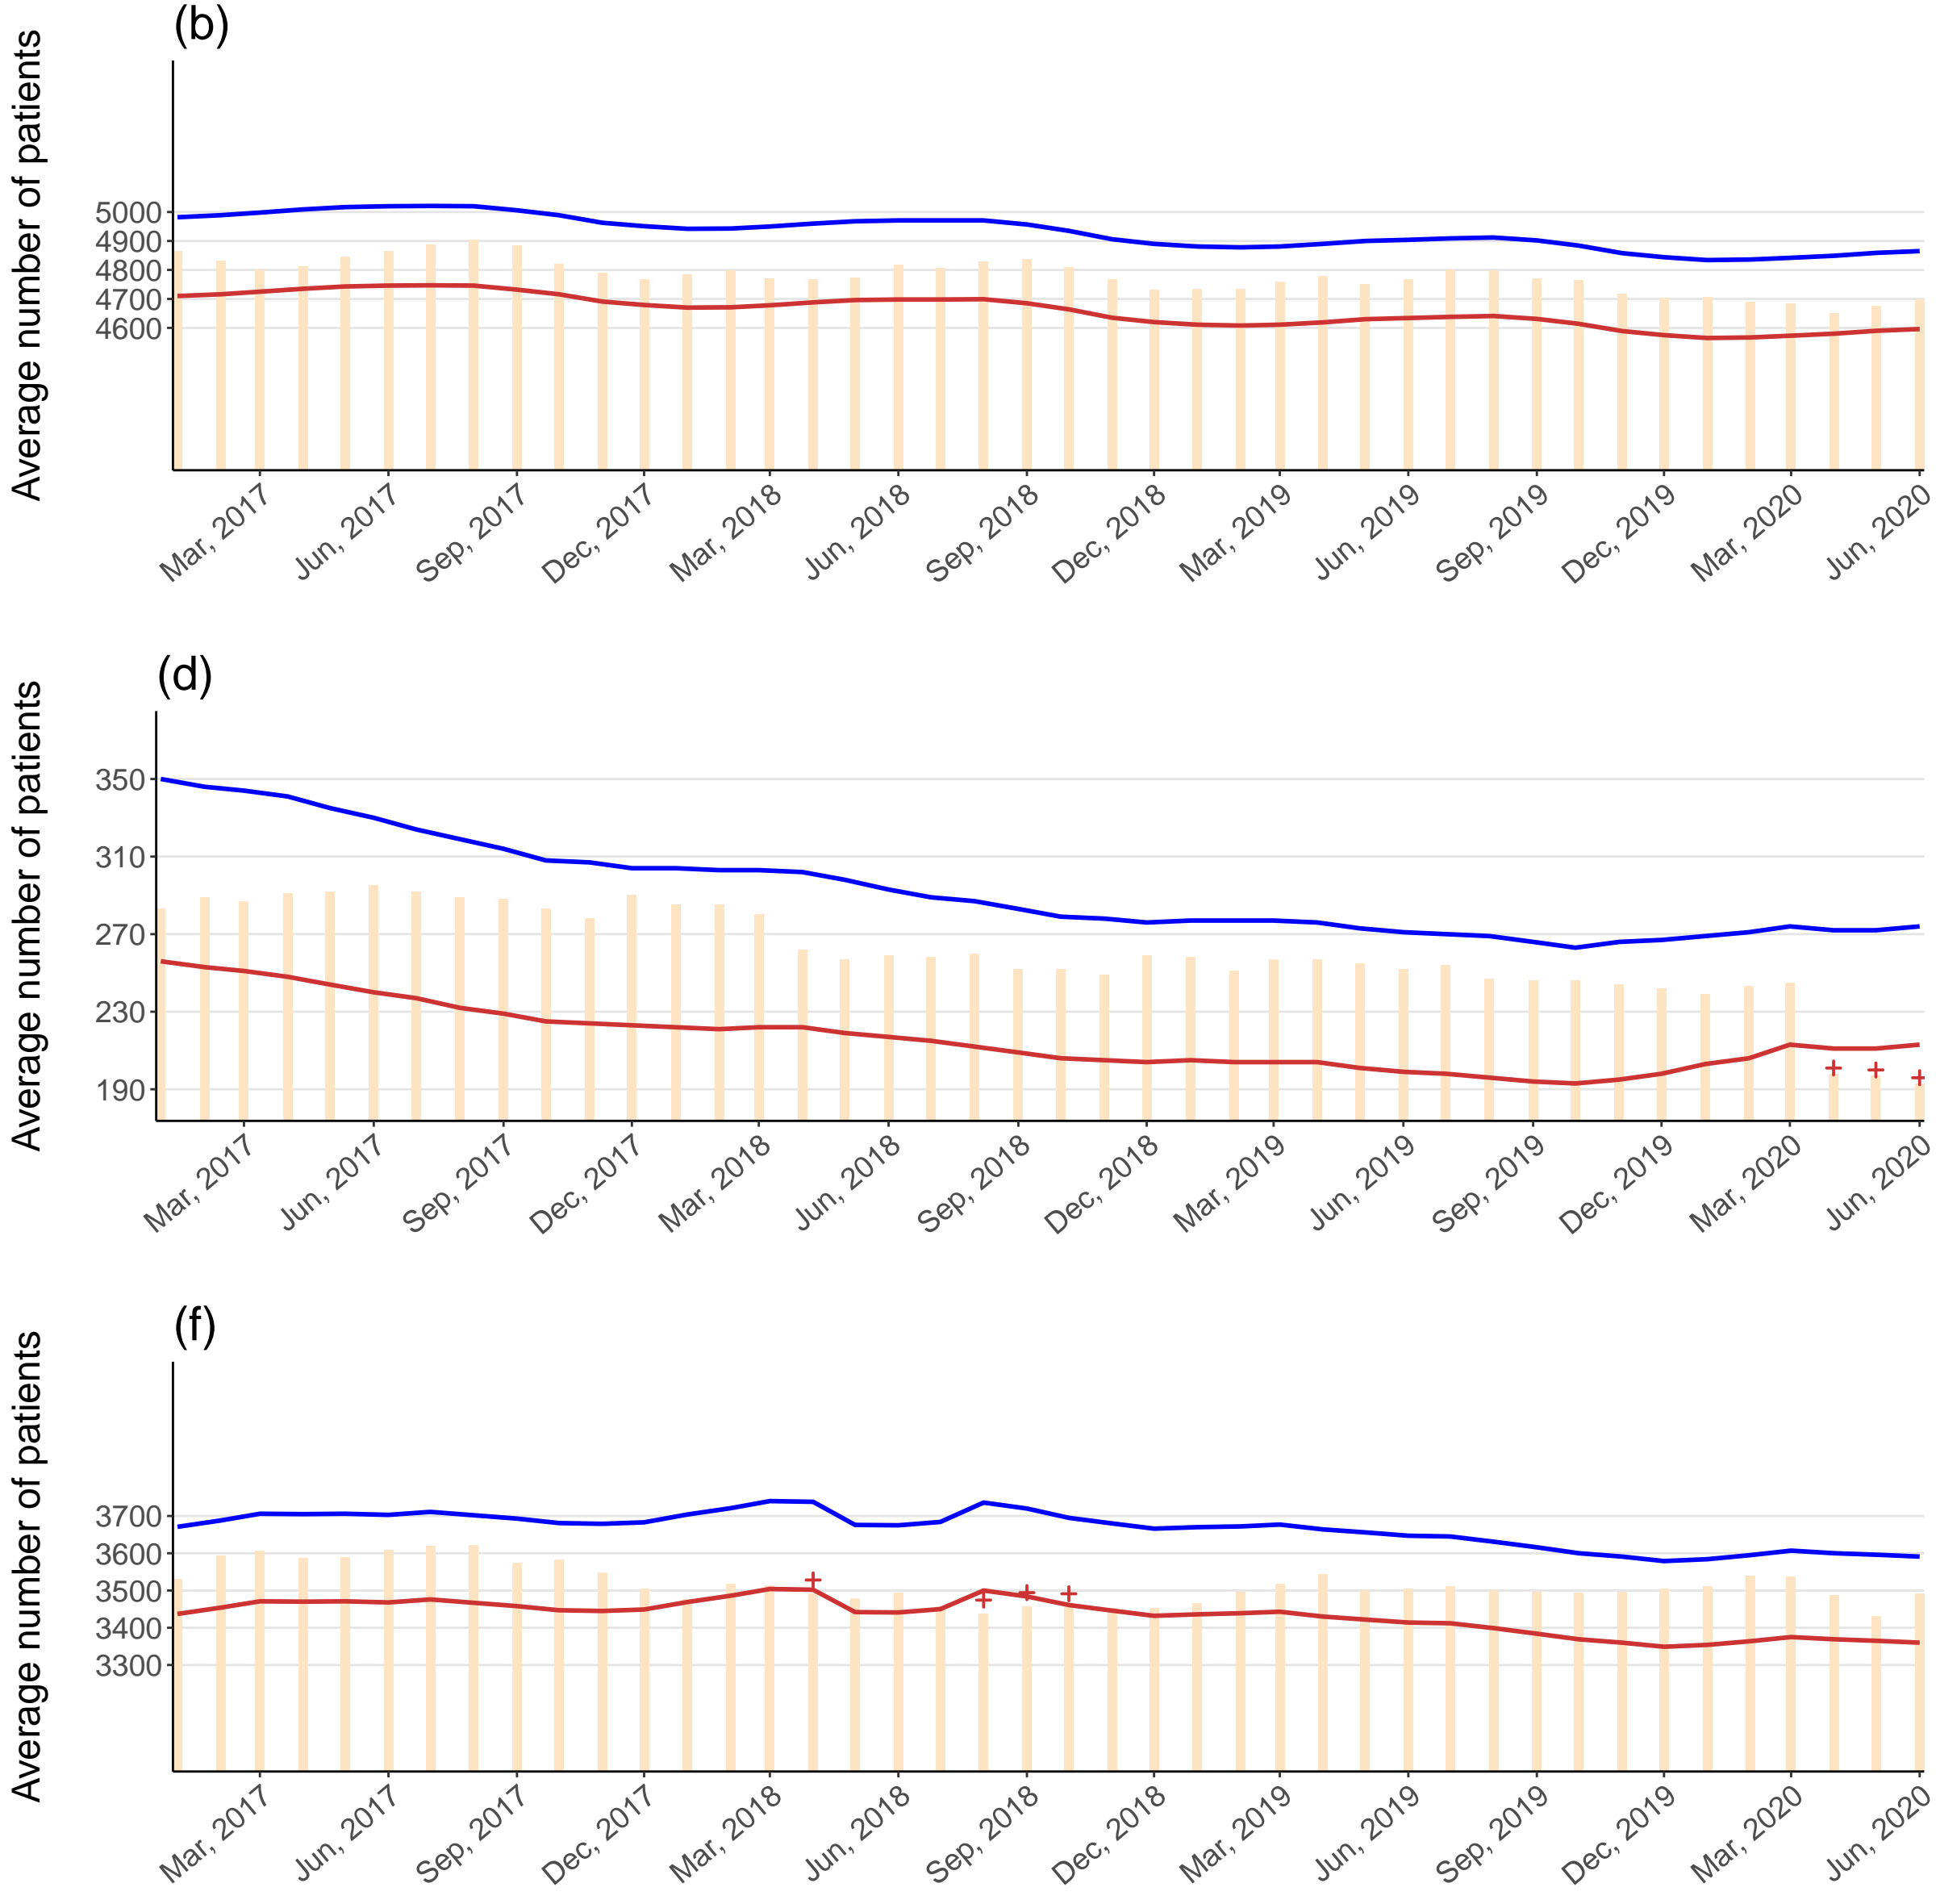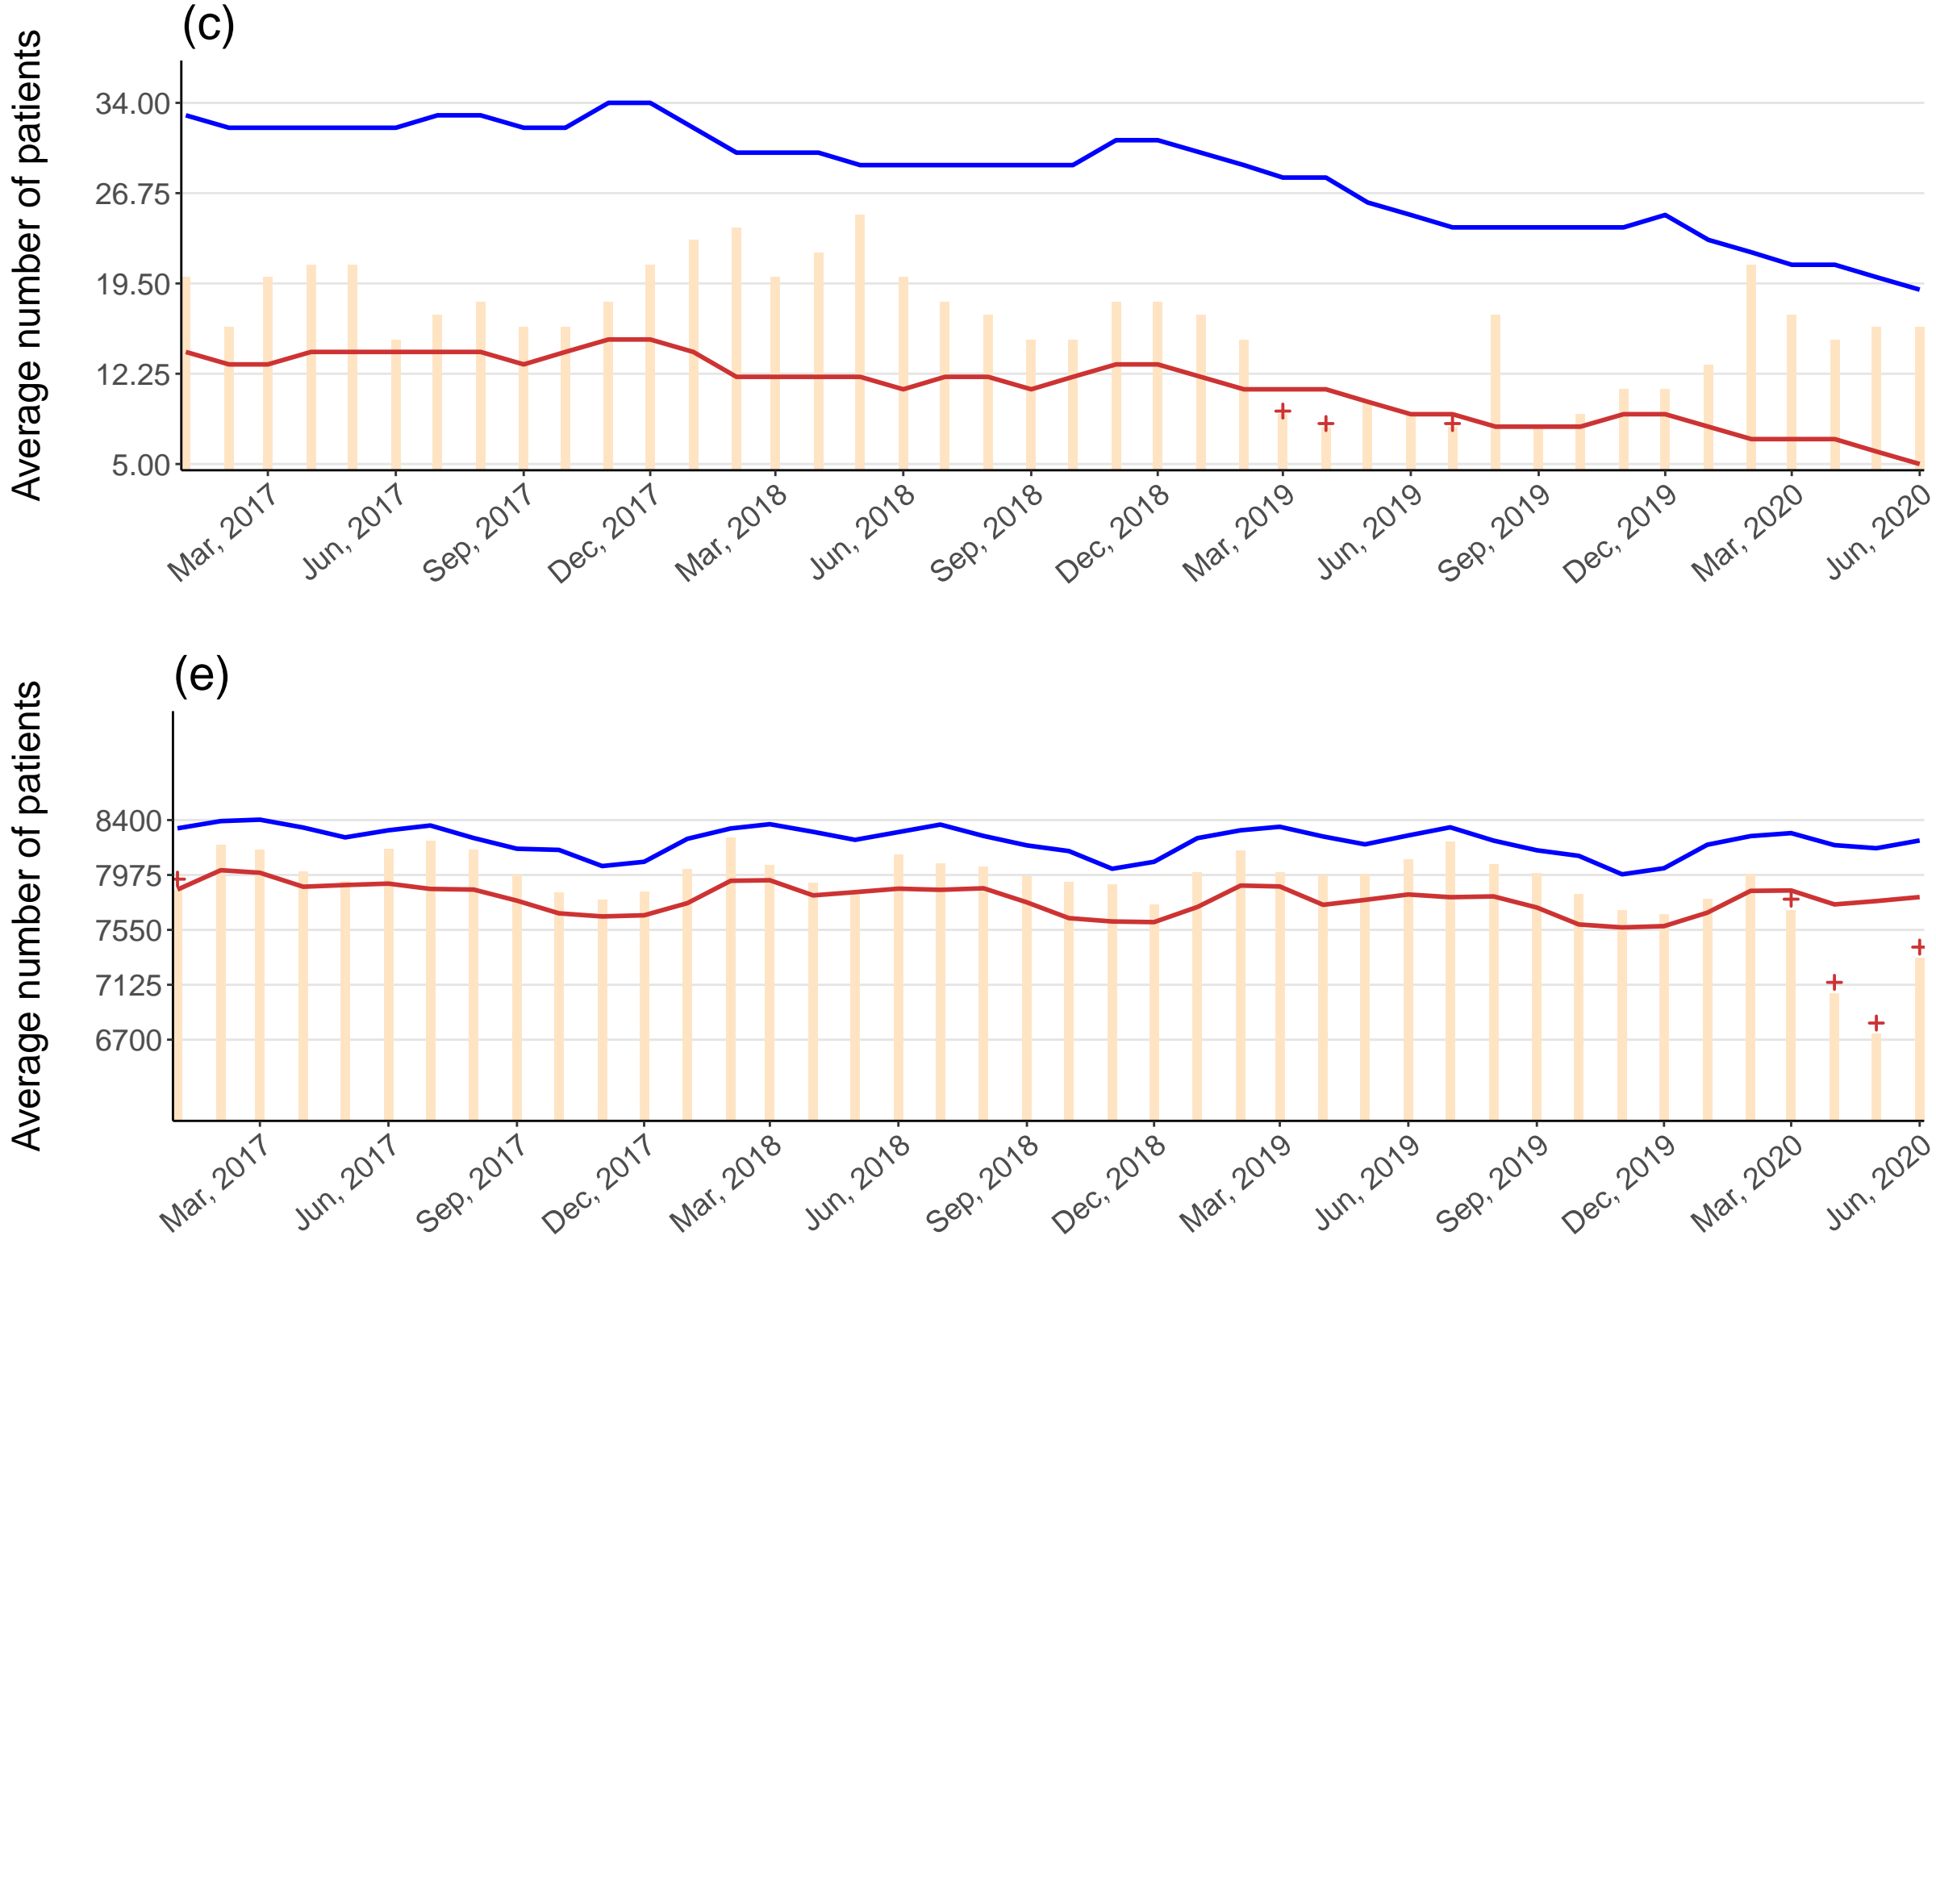

Supplement: s1 [file s1]
