# Supplementary material for: Trends in Healthcare Access in Japan during the First Wave of the COVID-19 Pandemic, up to June 2020
Source: MDPI journal article supplement (doi:10.3390/ijerph18063271), 2021-03-22

# Hokkaido

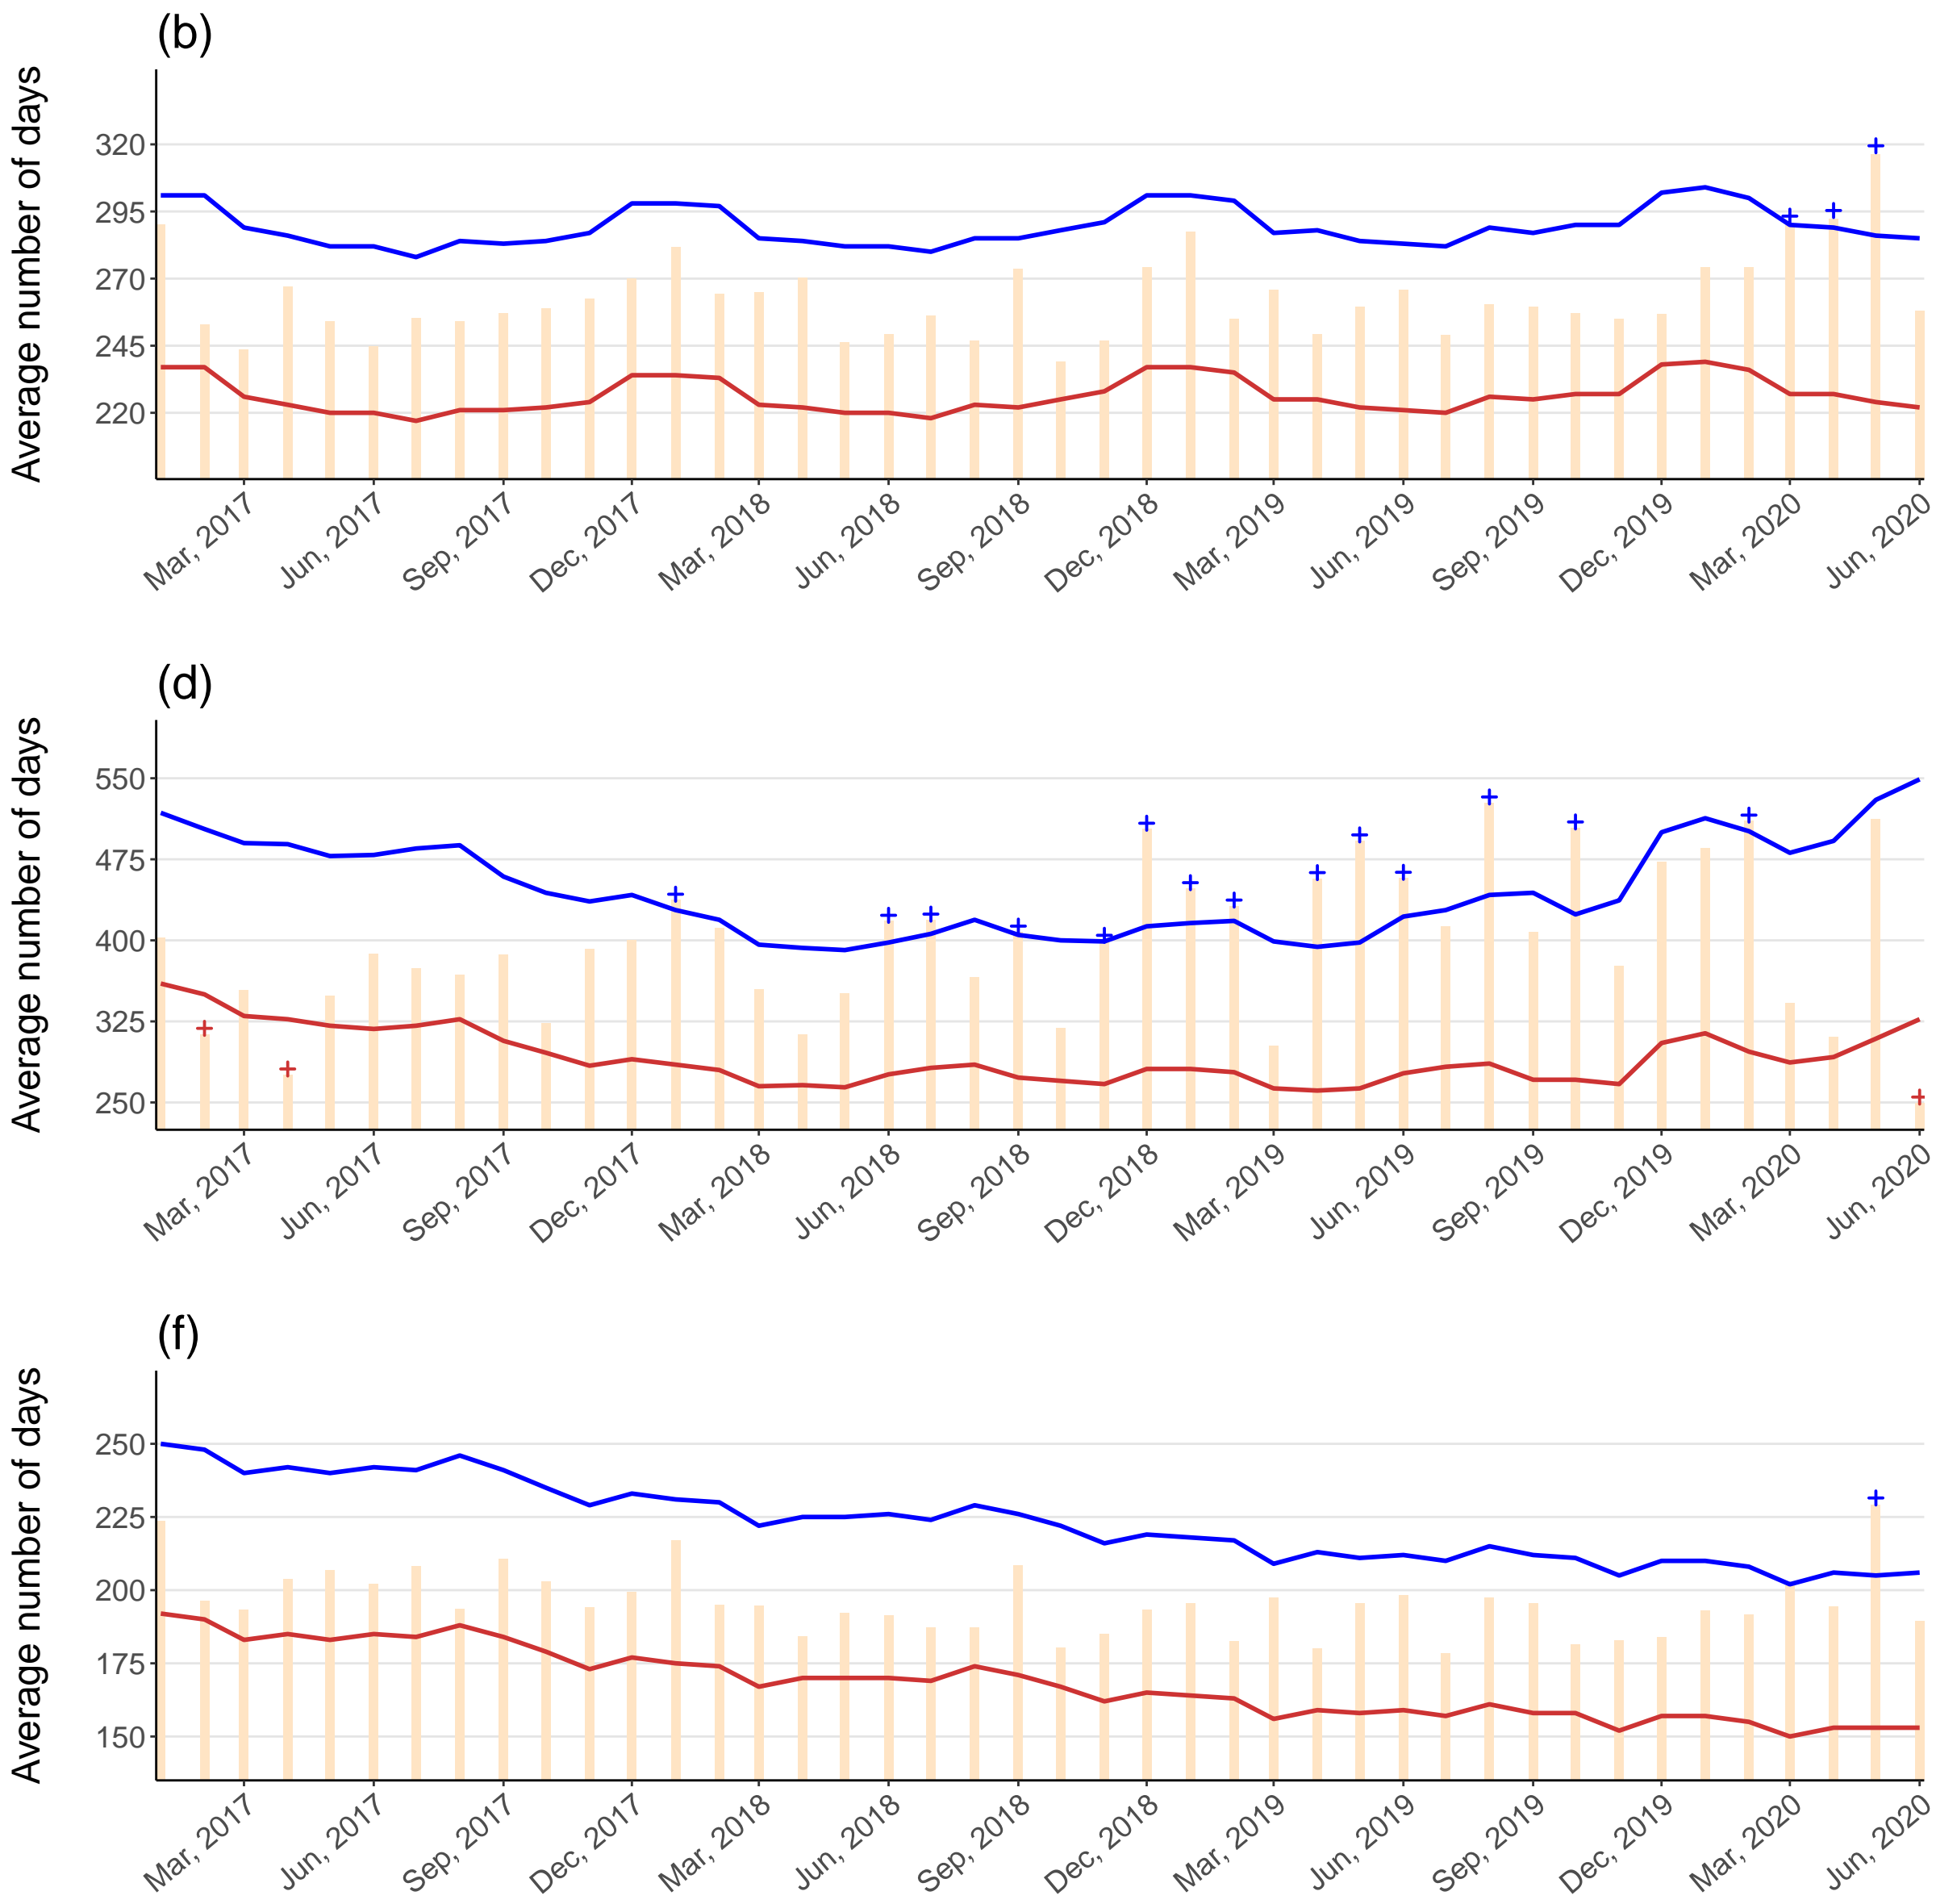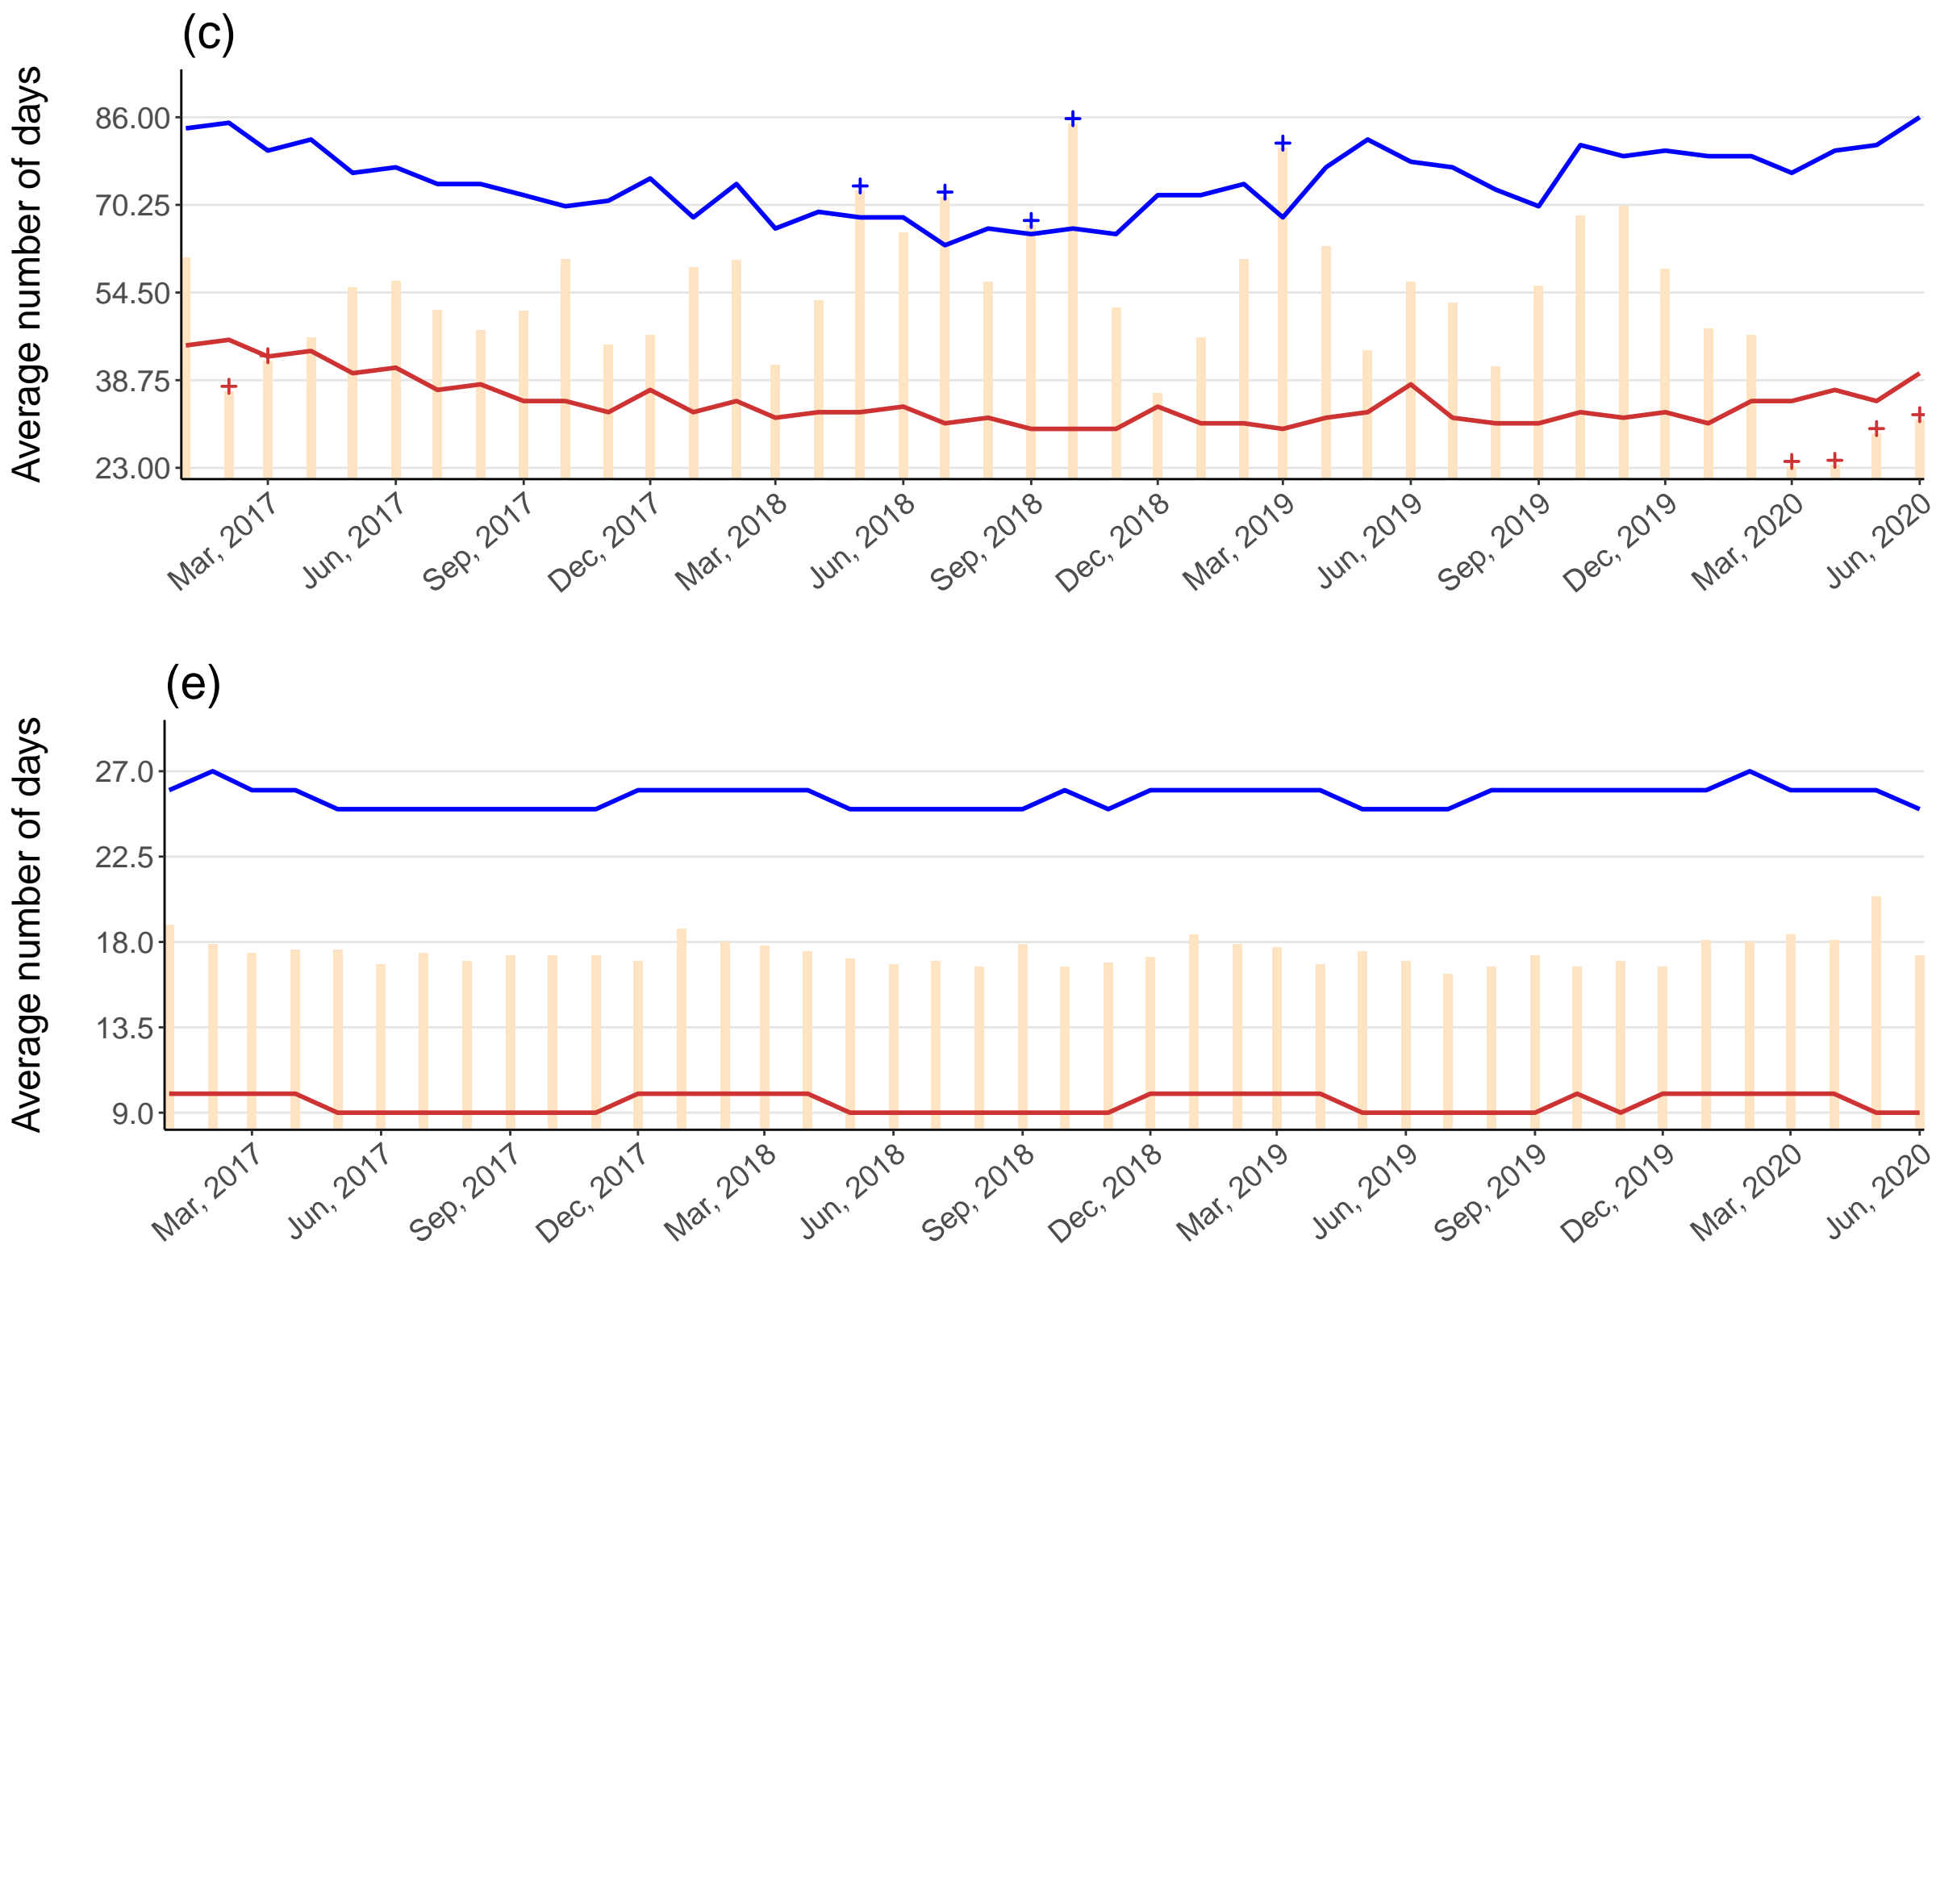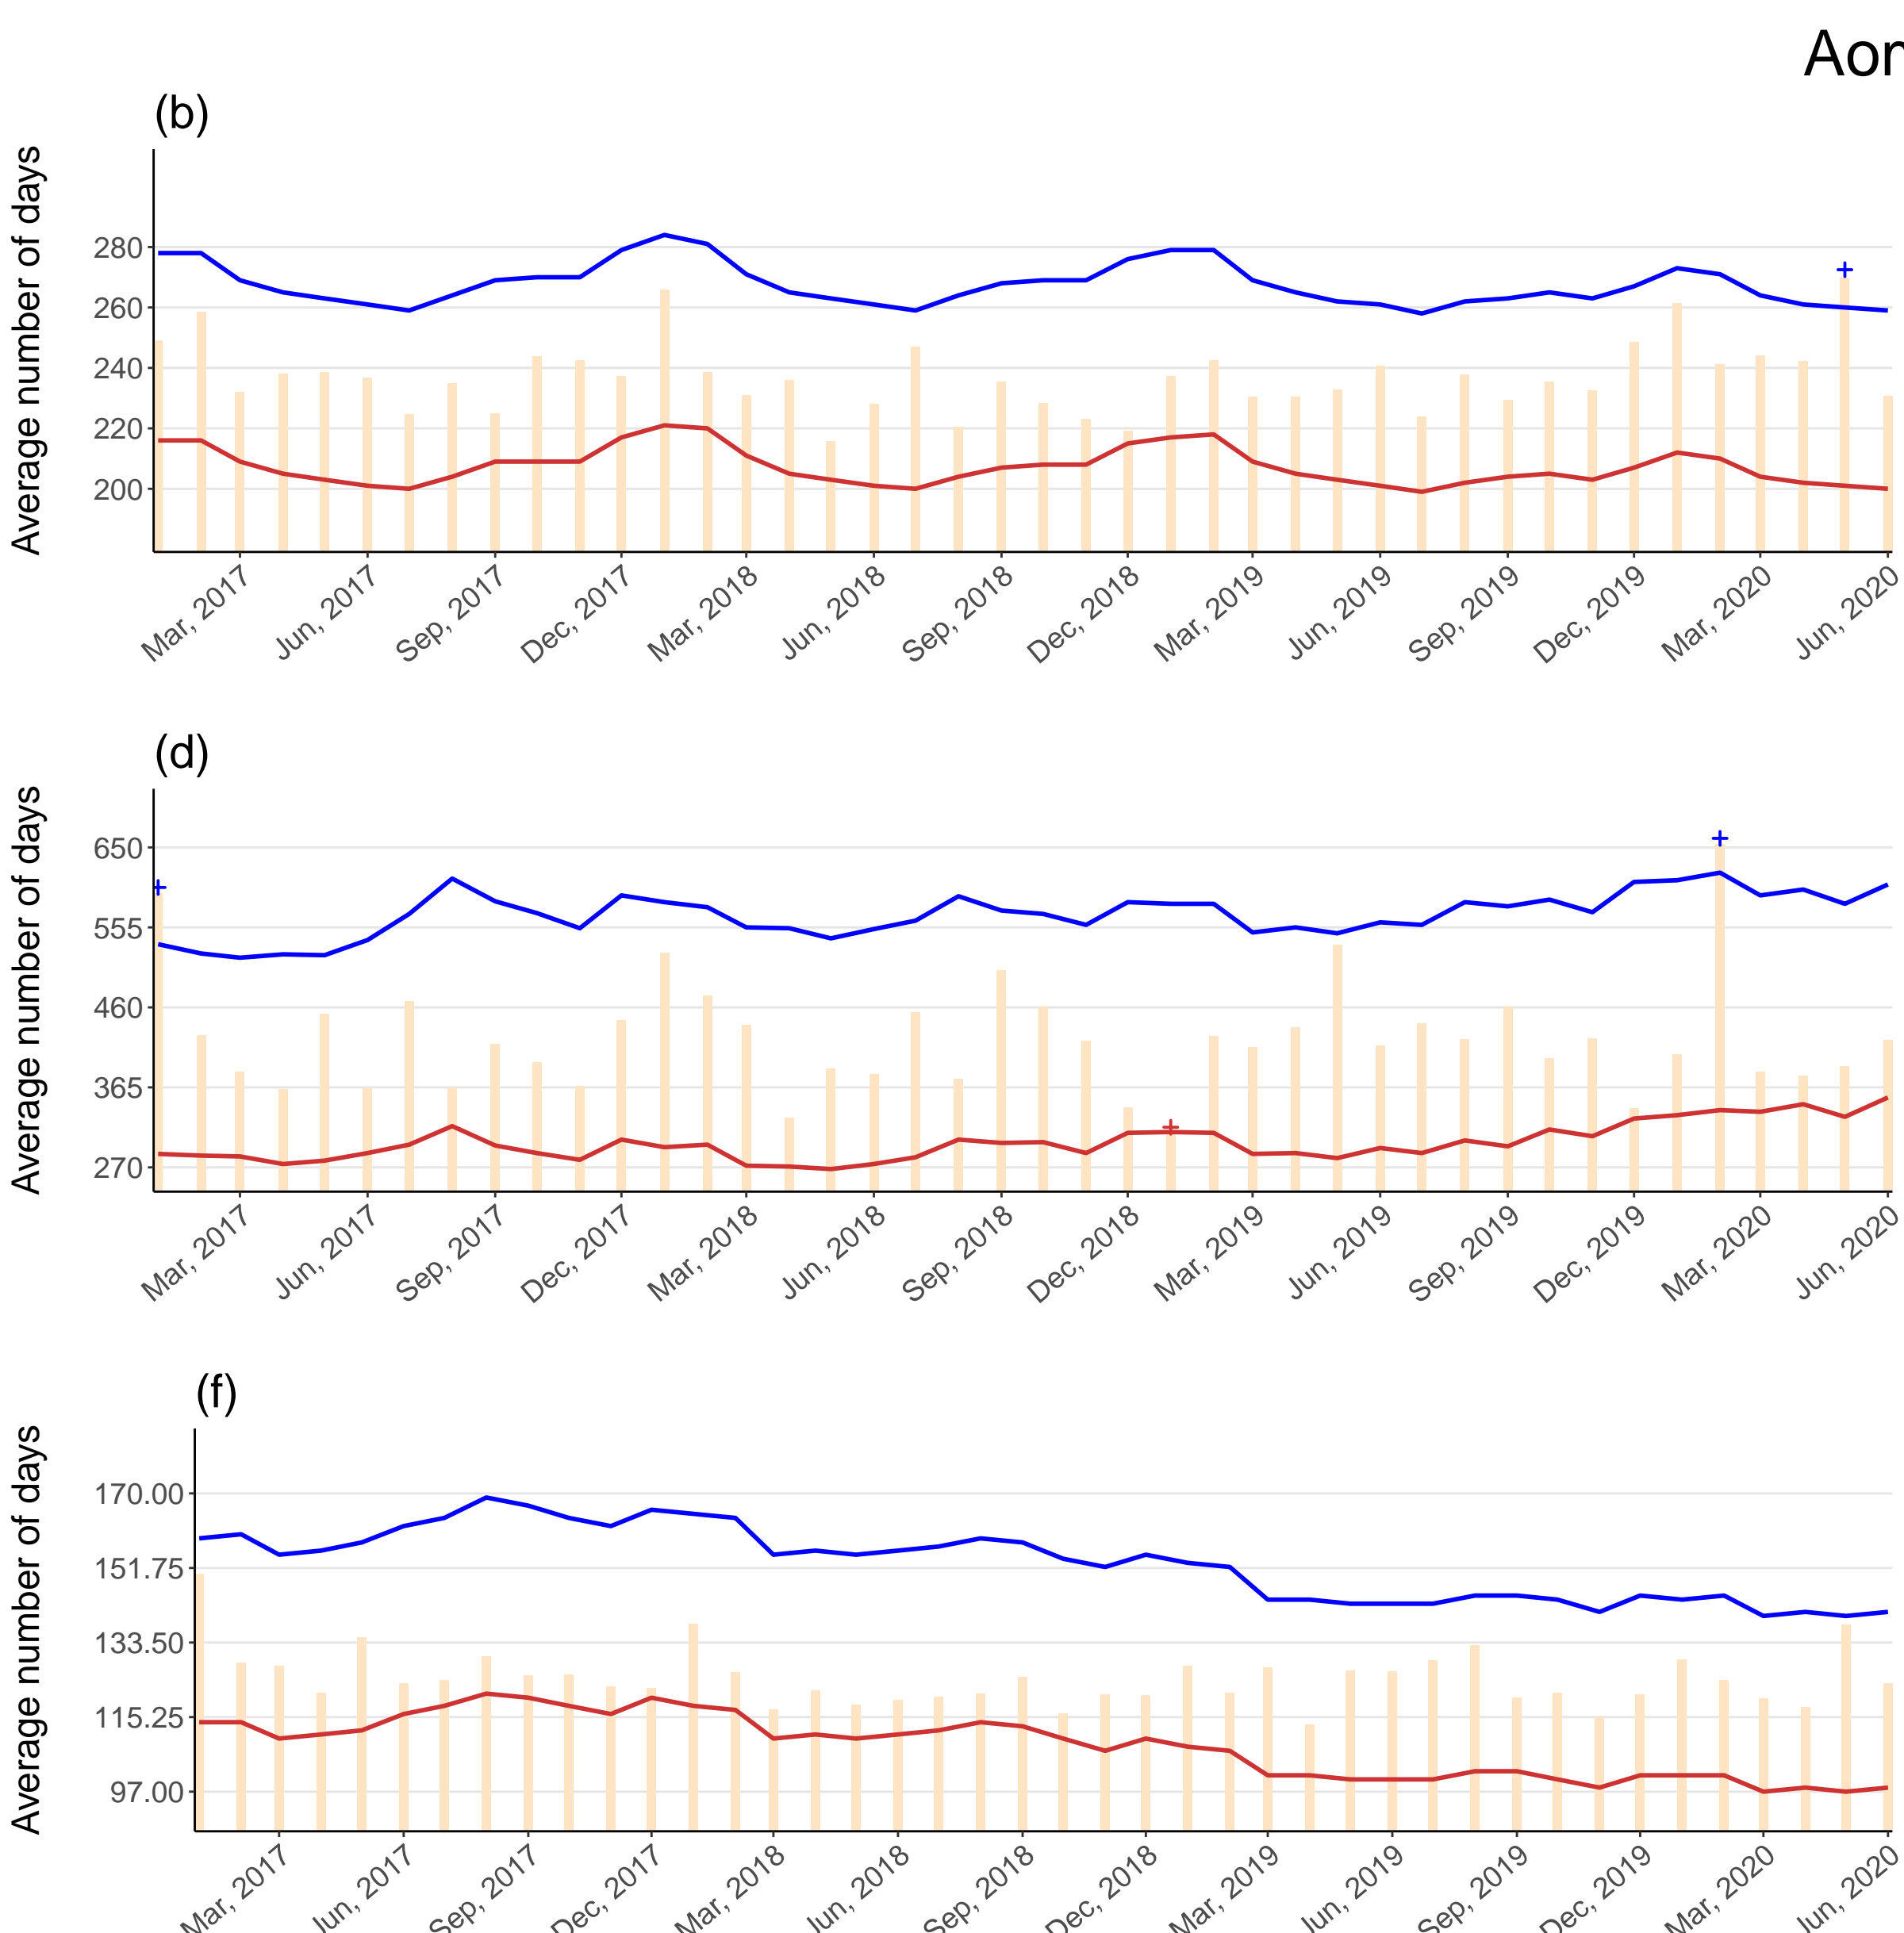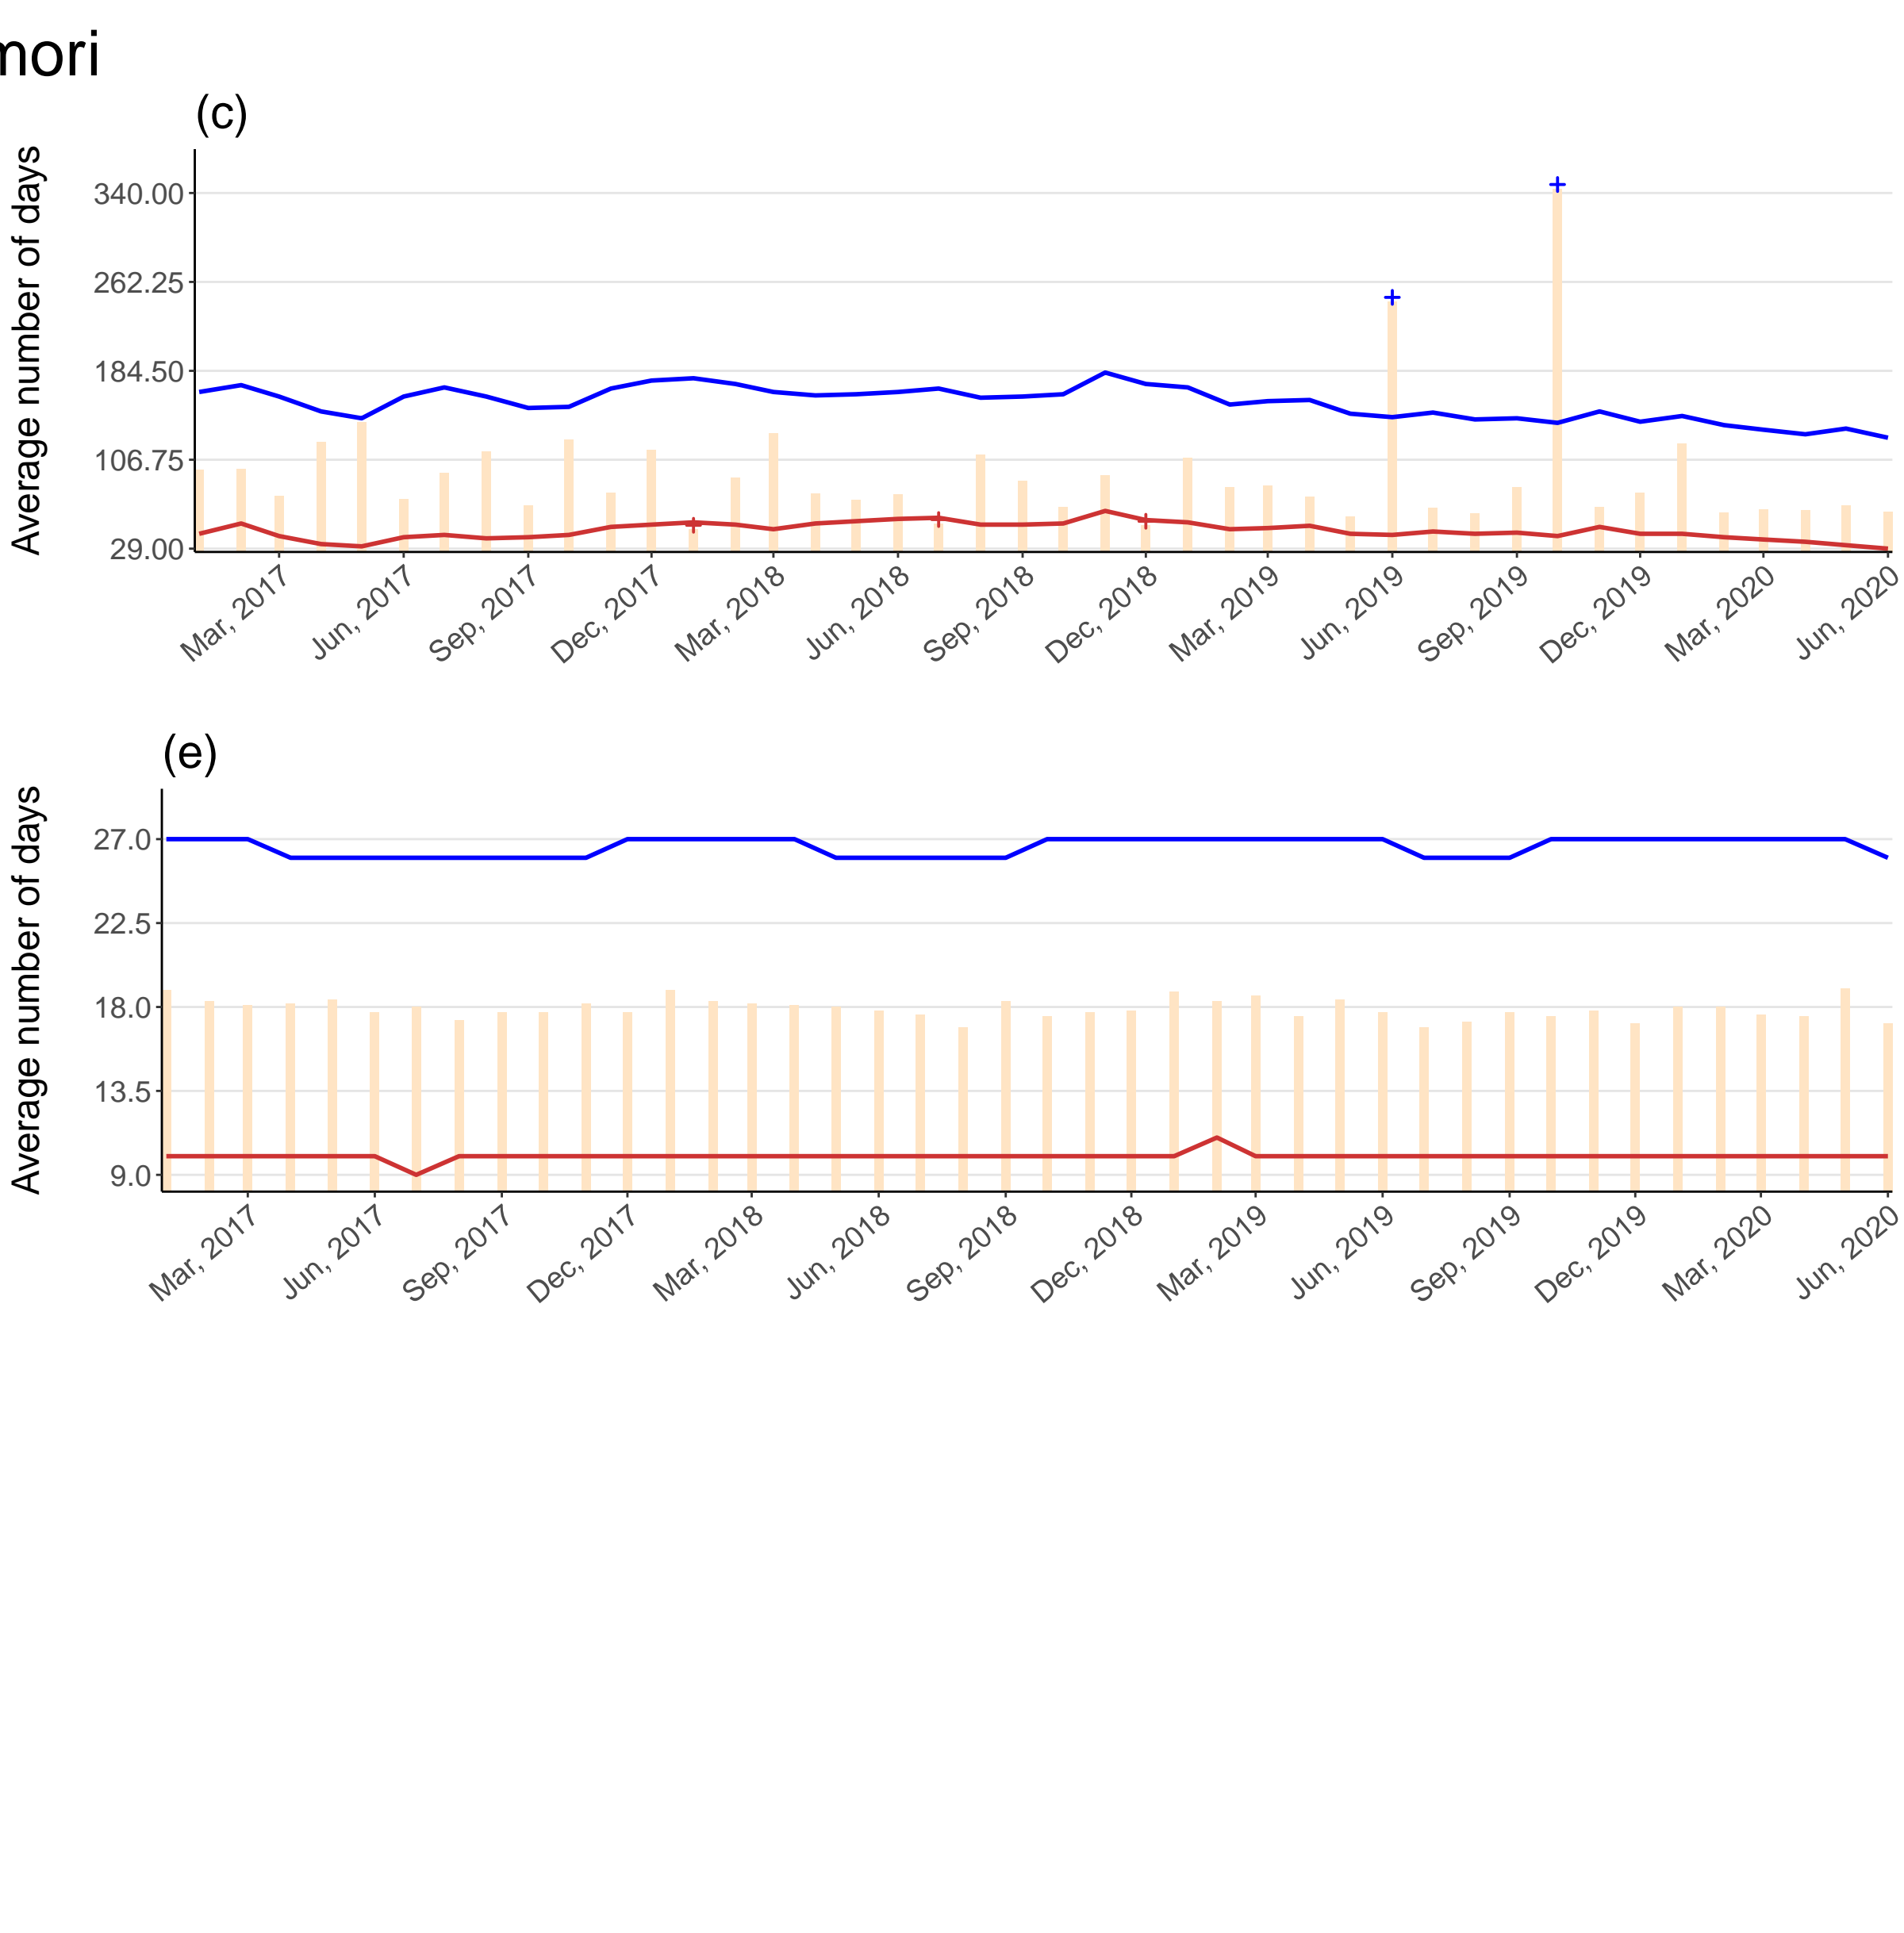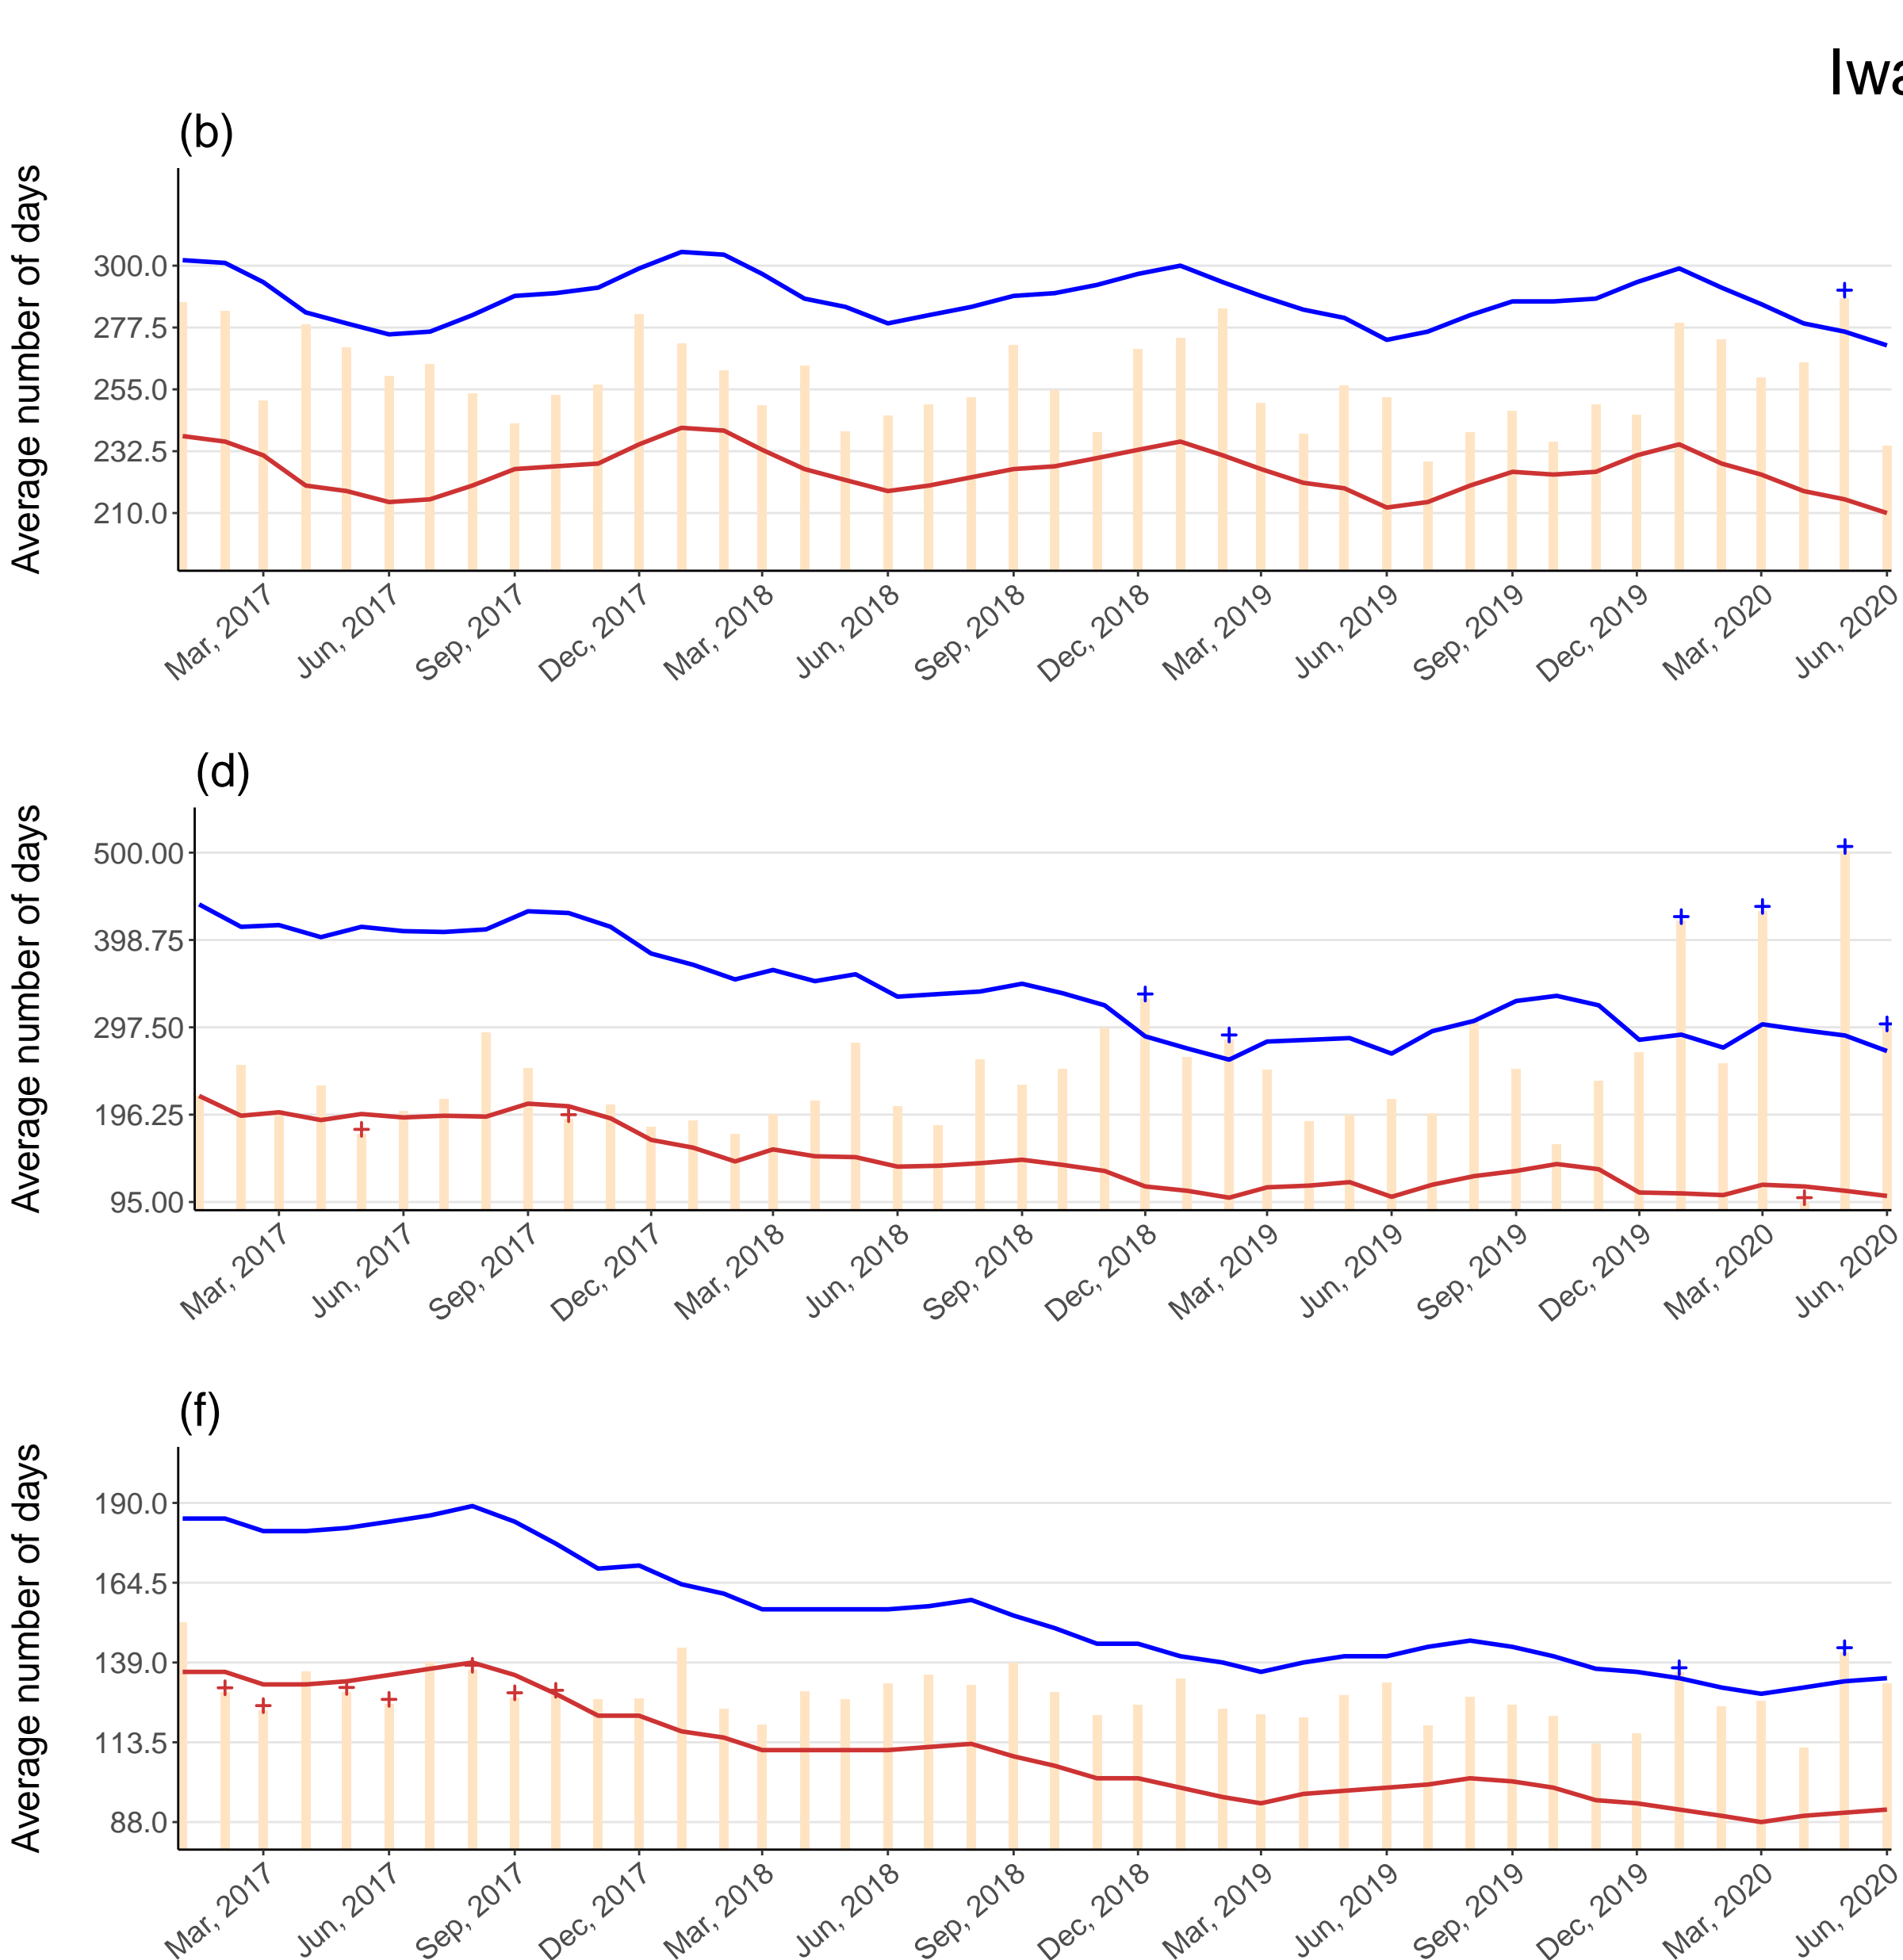

# Aomori

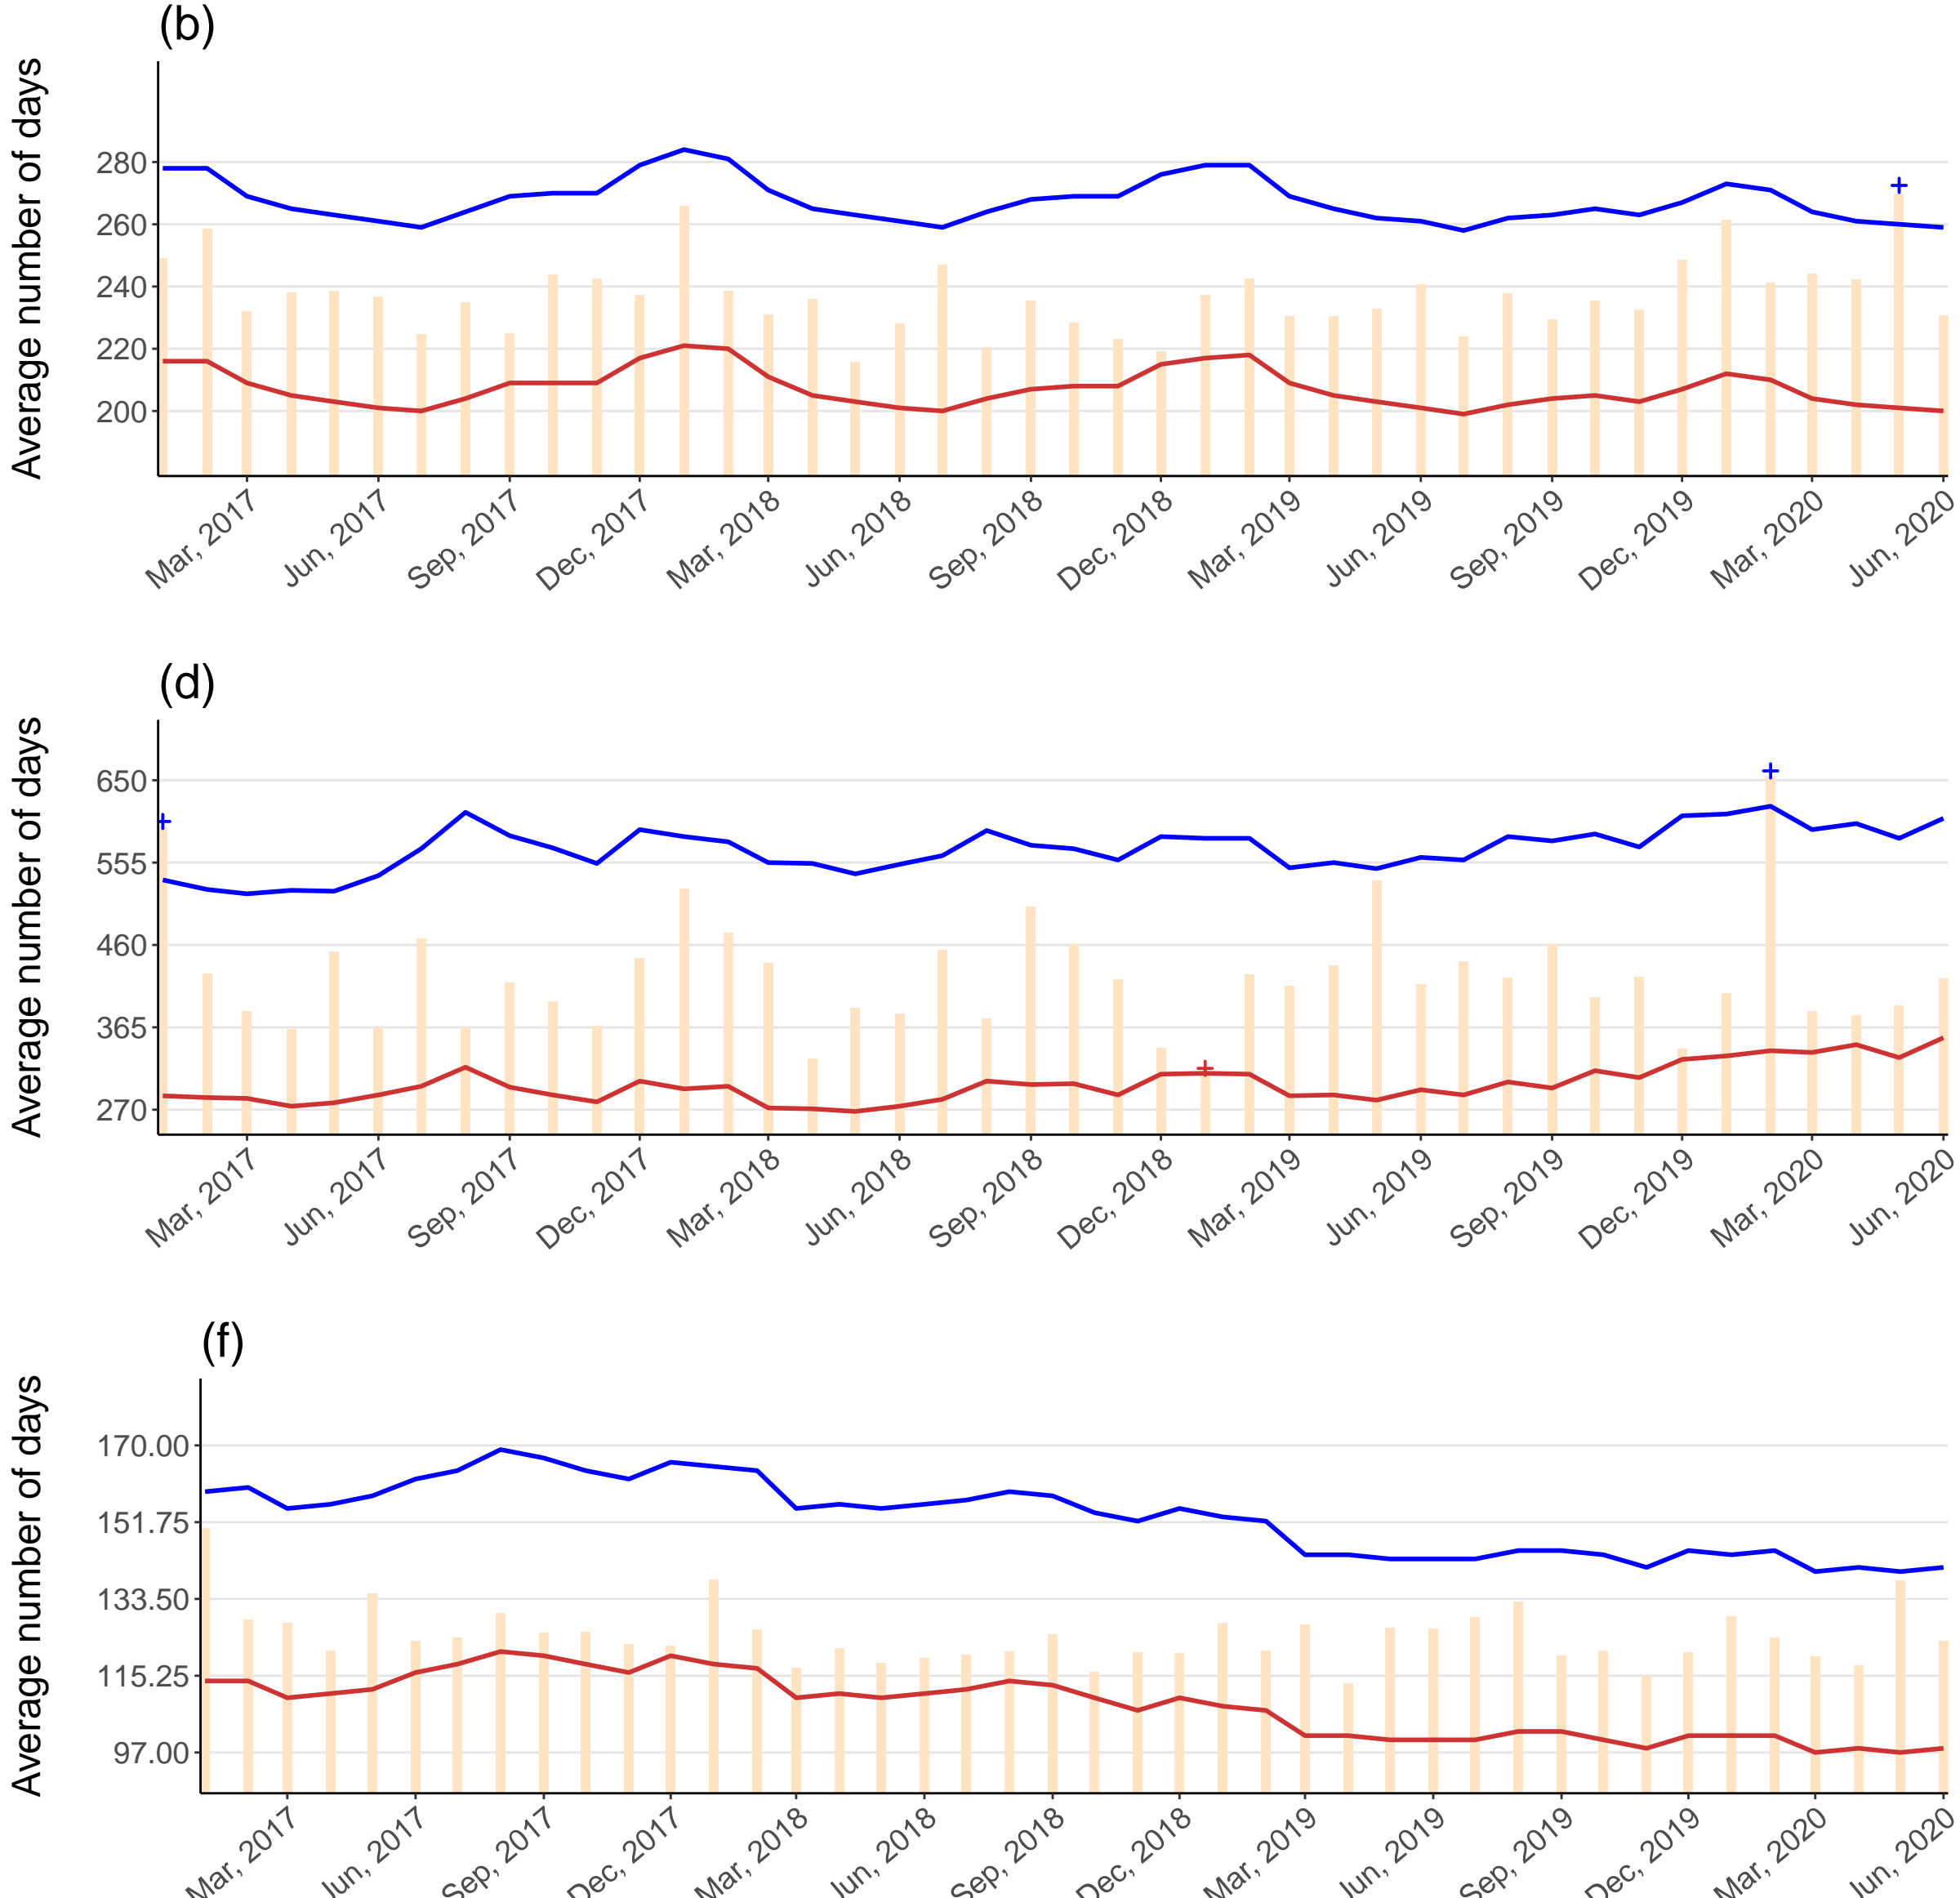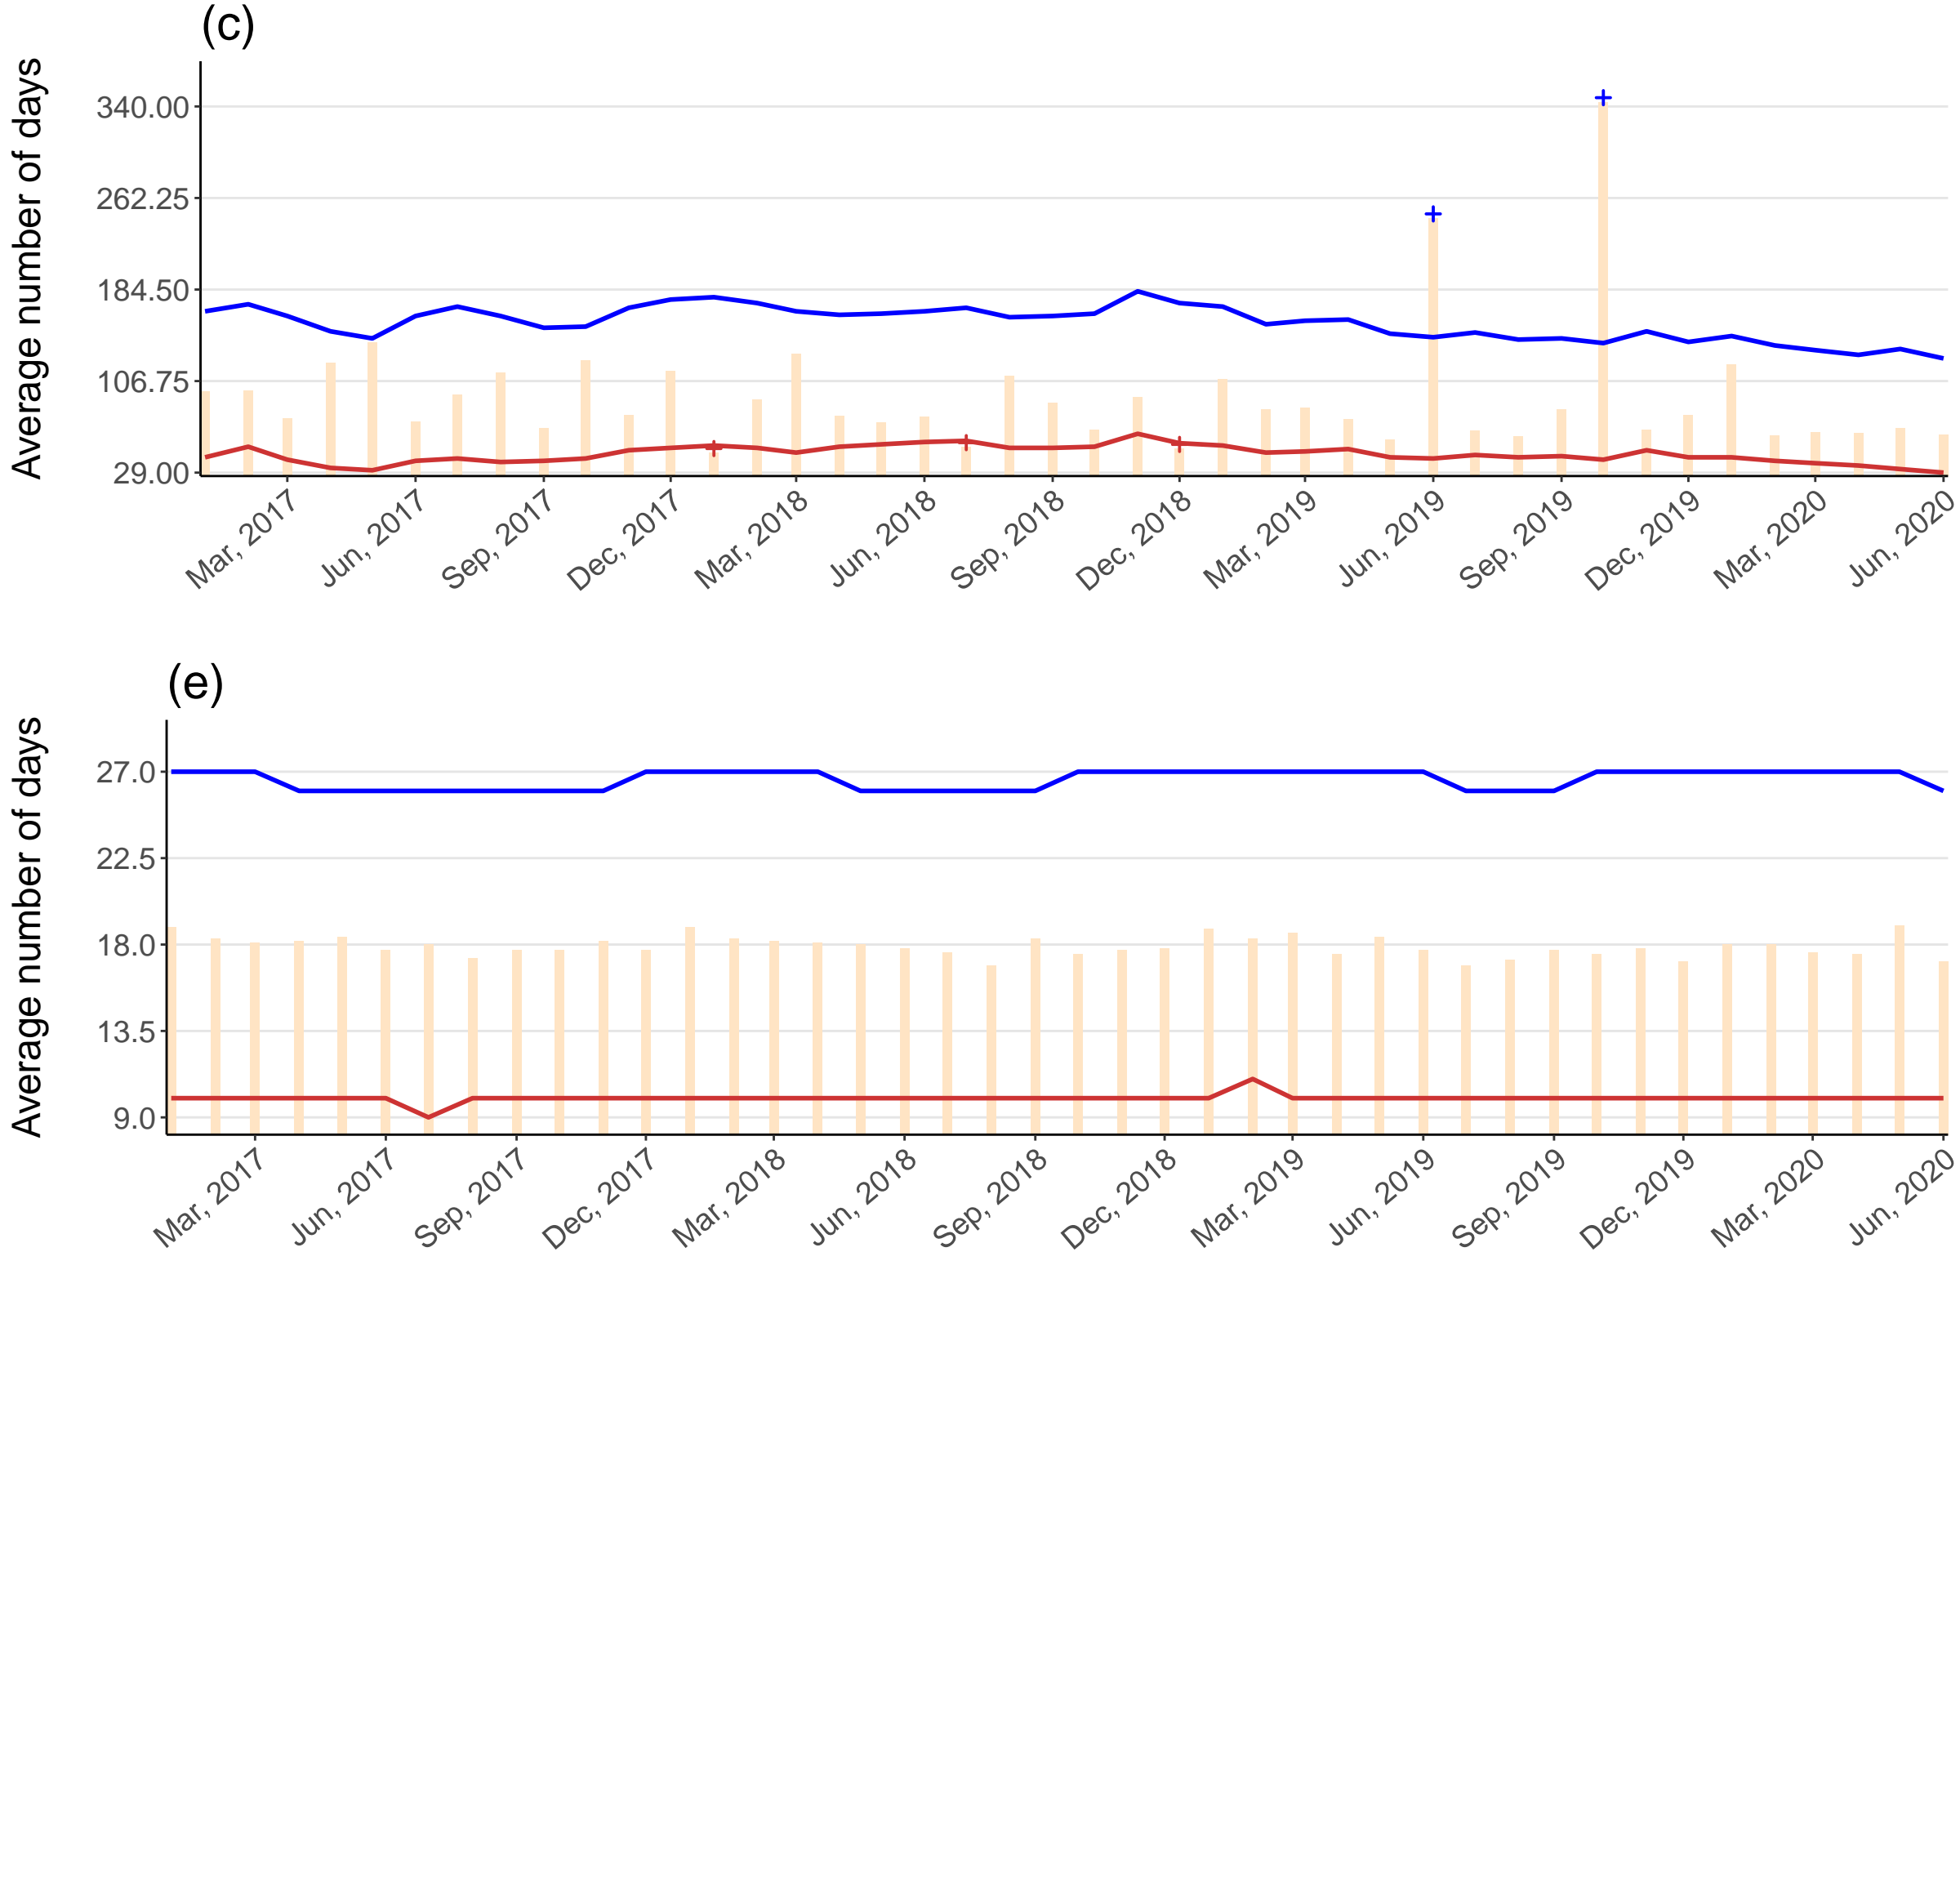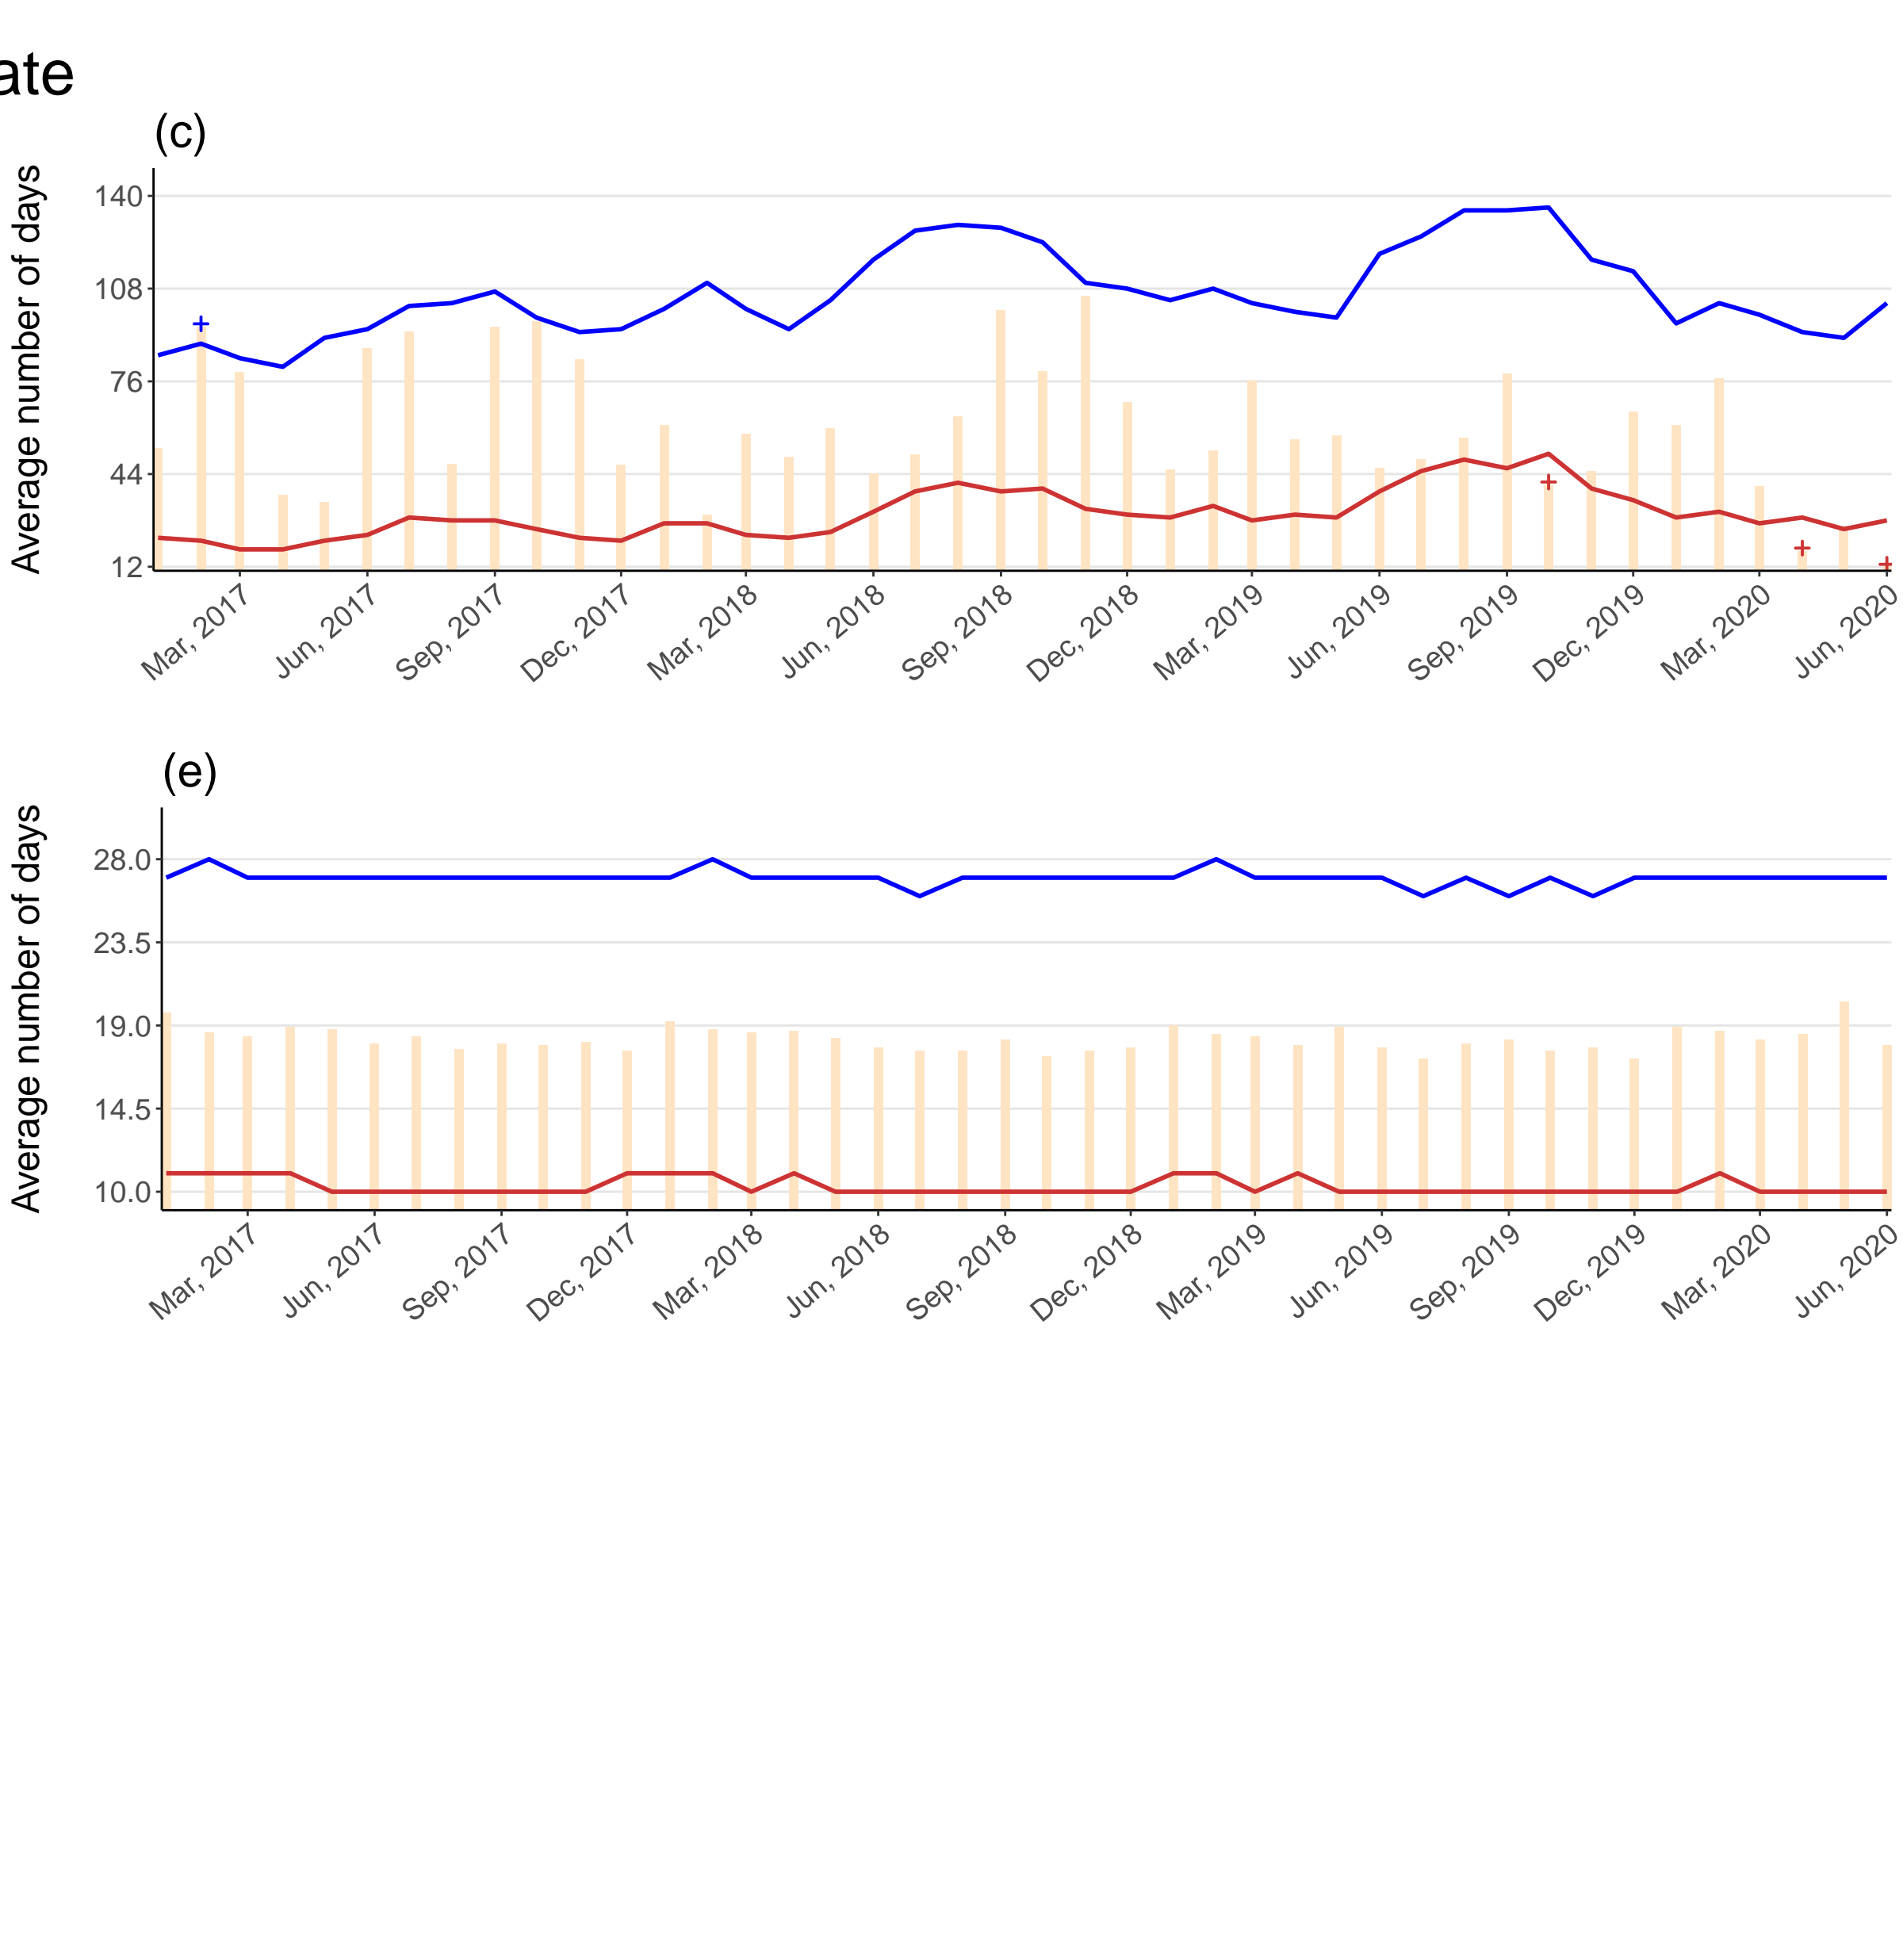

# Iwate

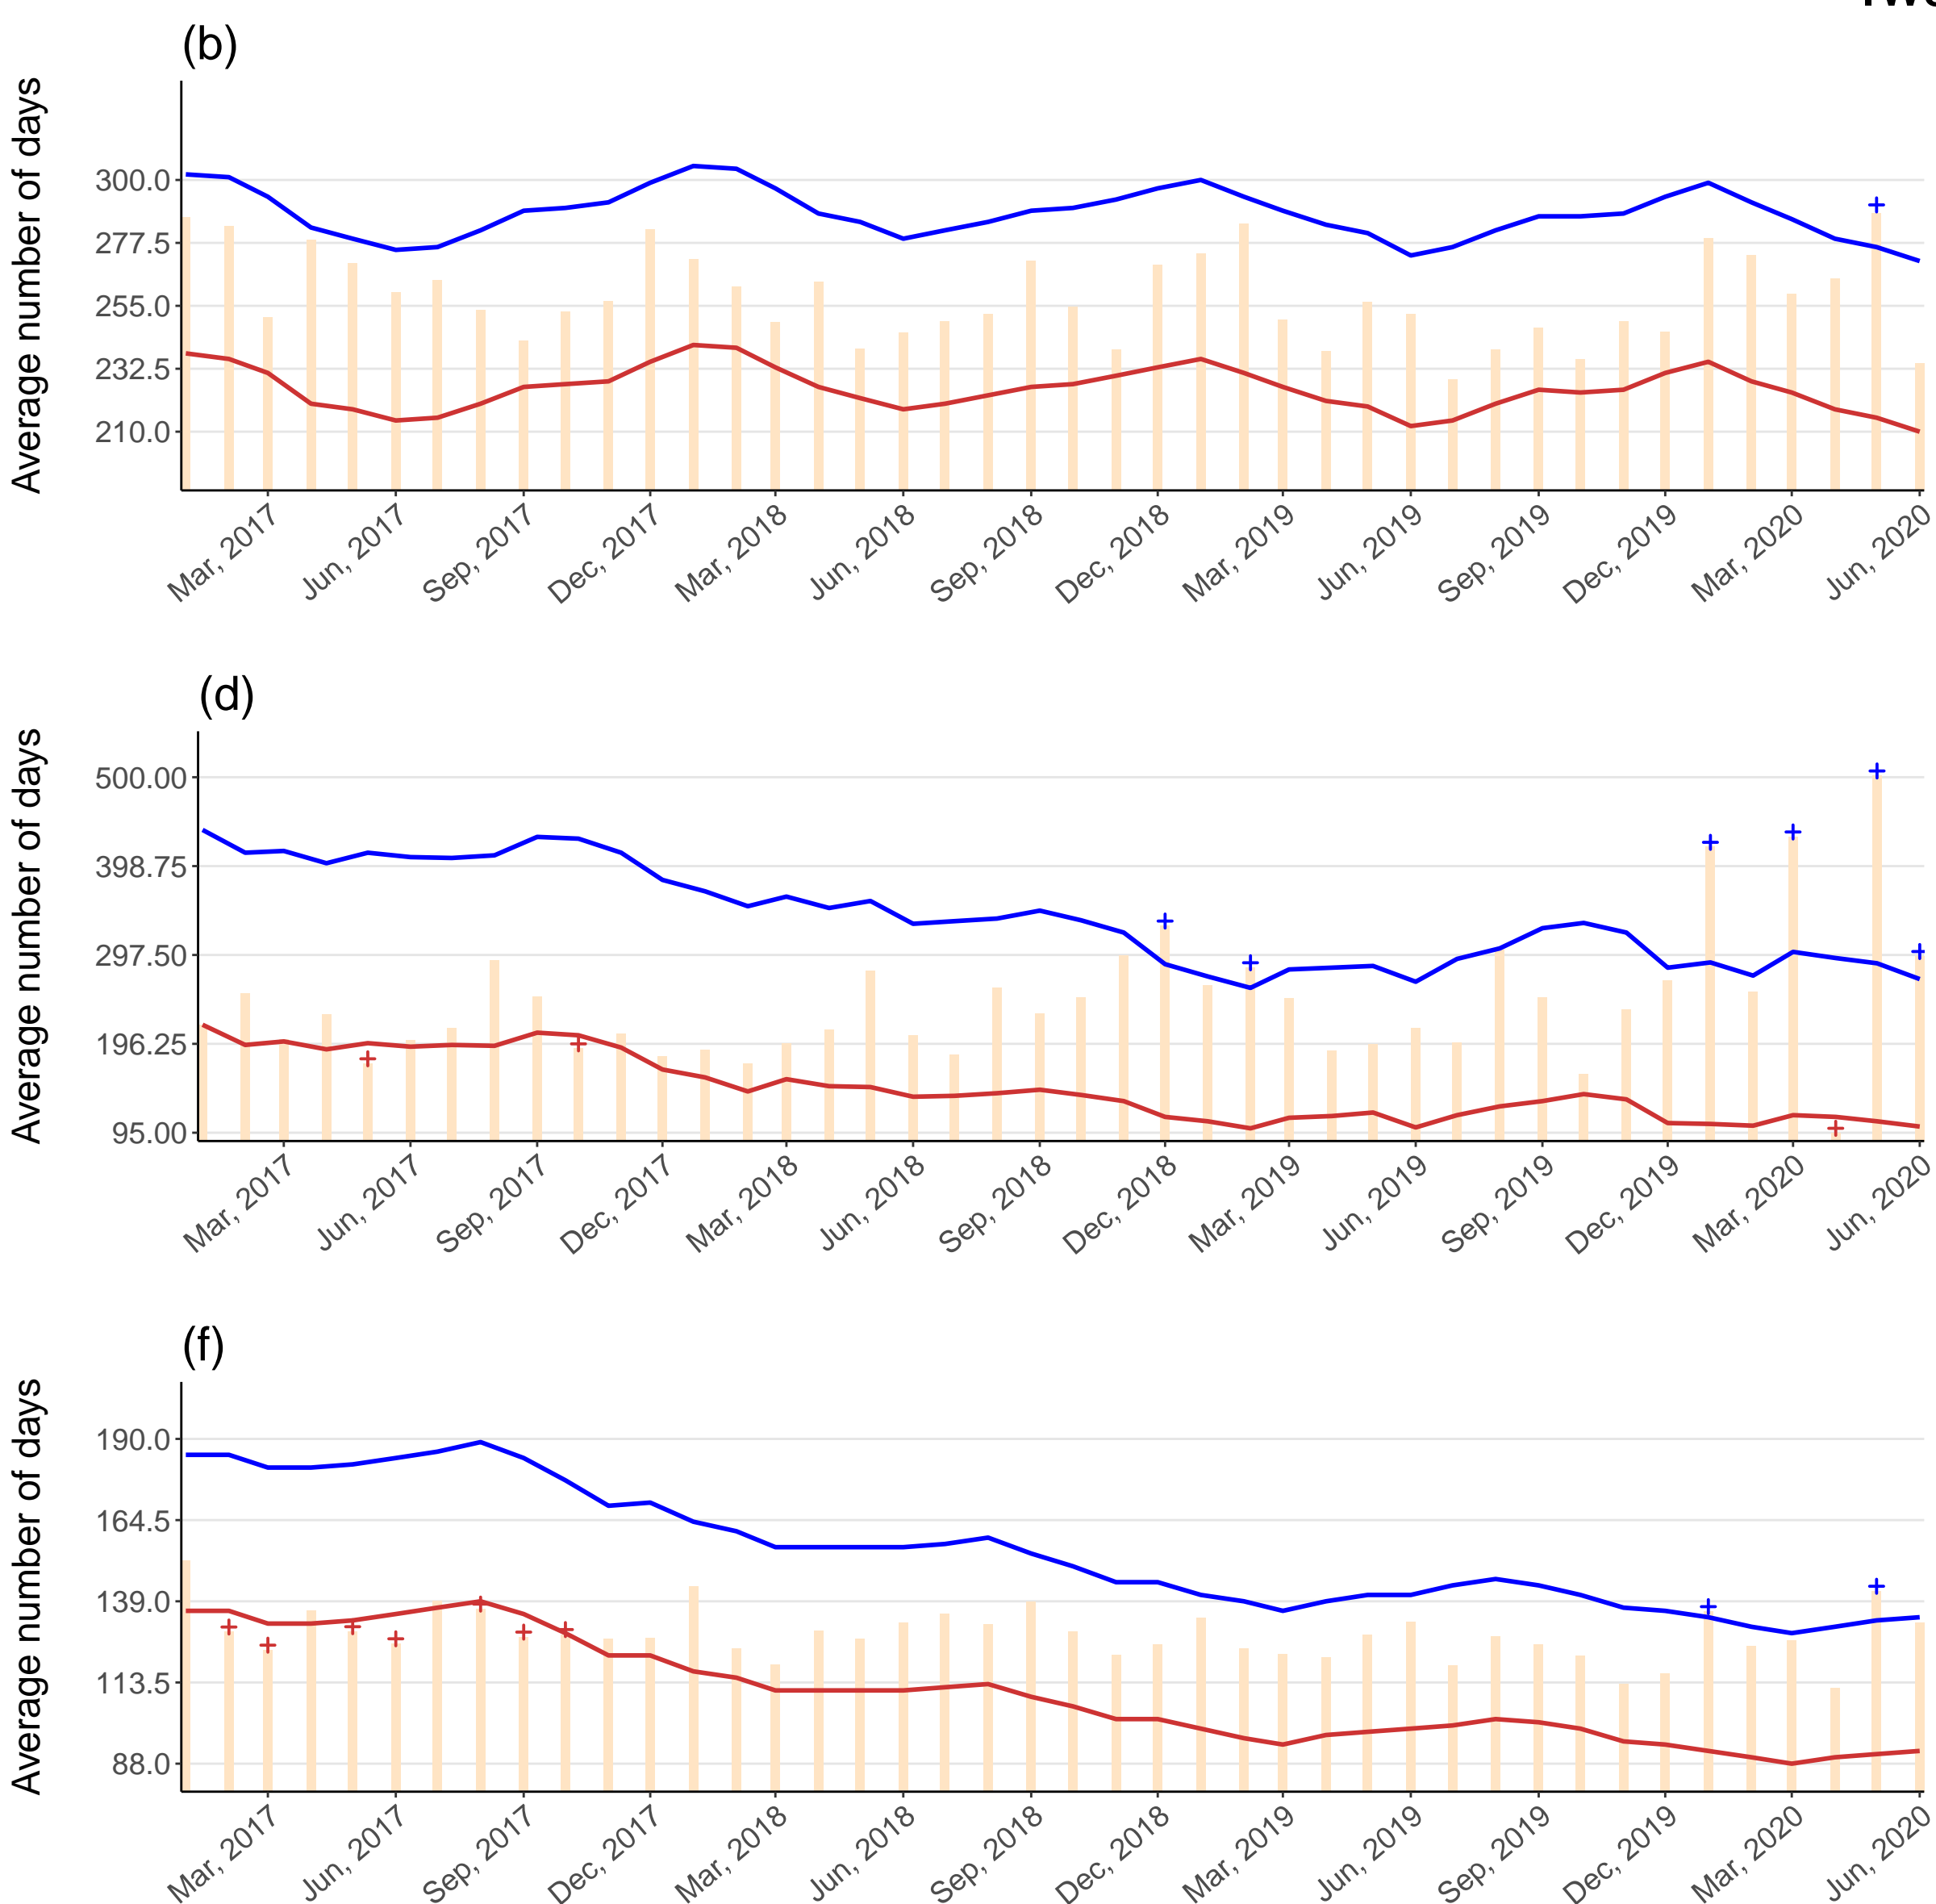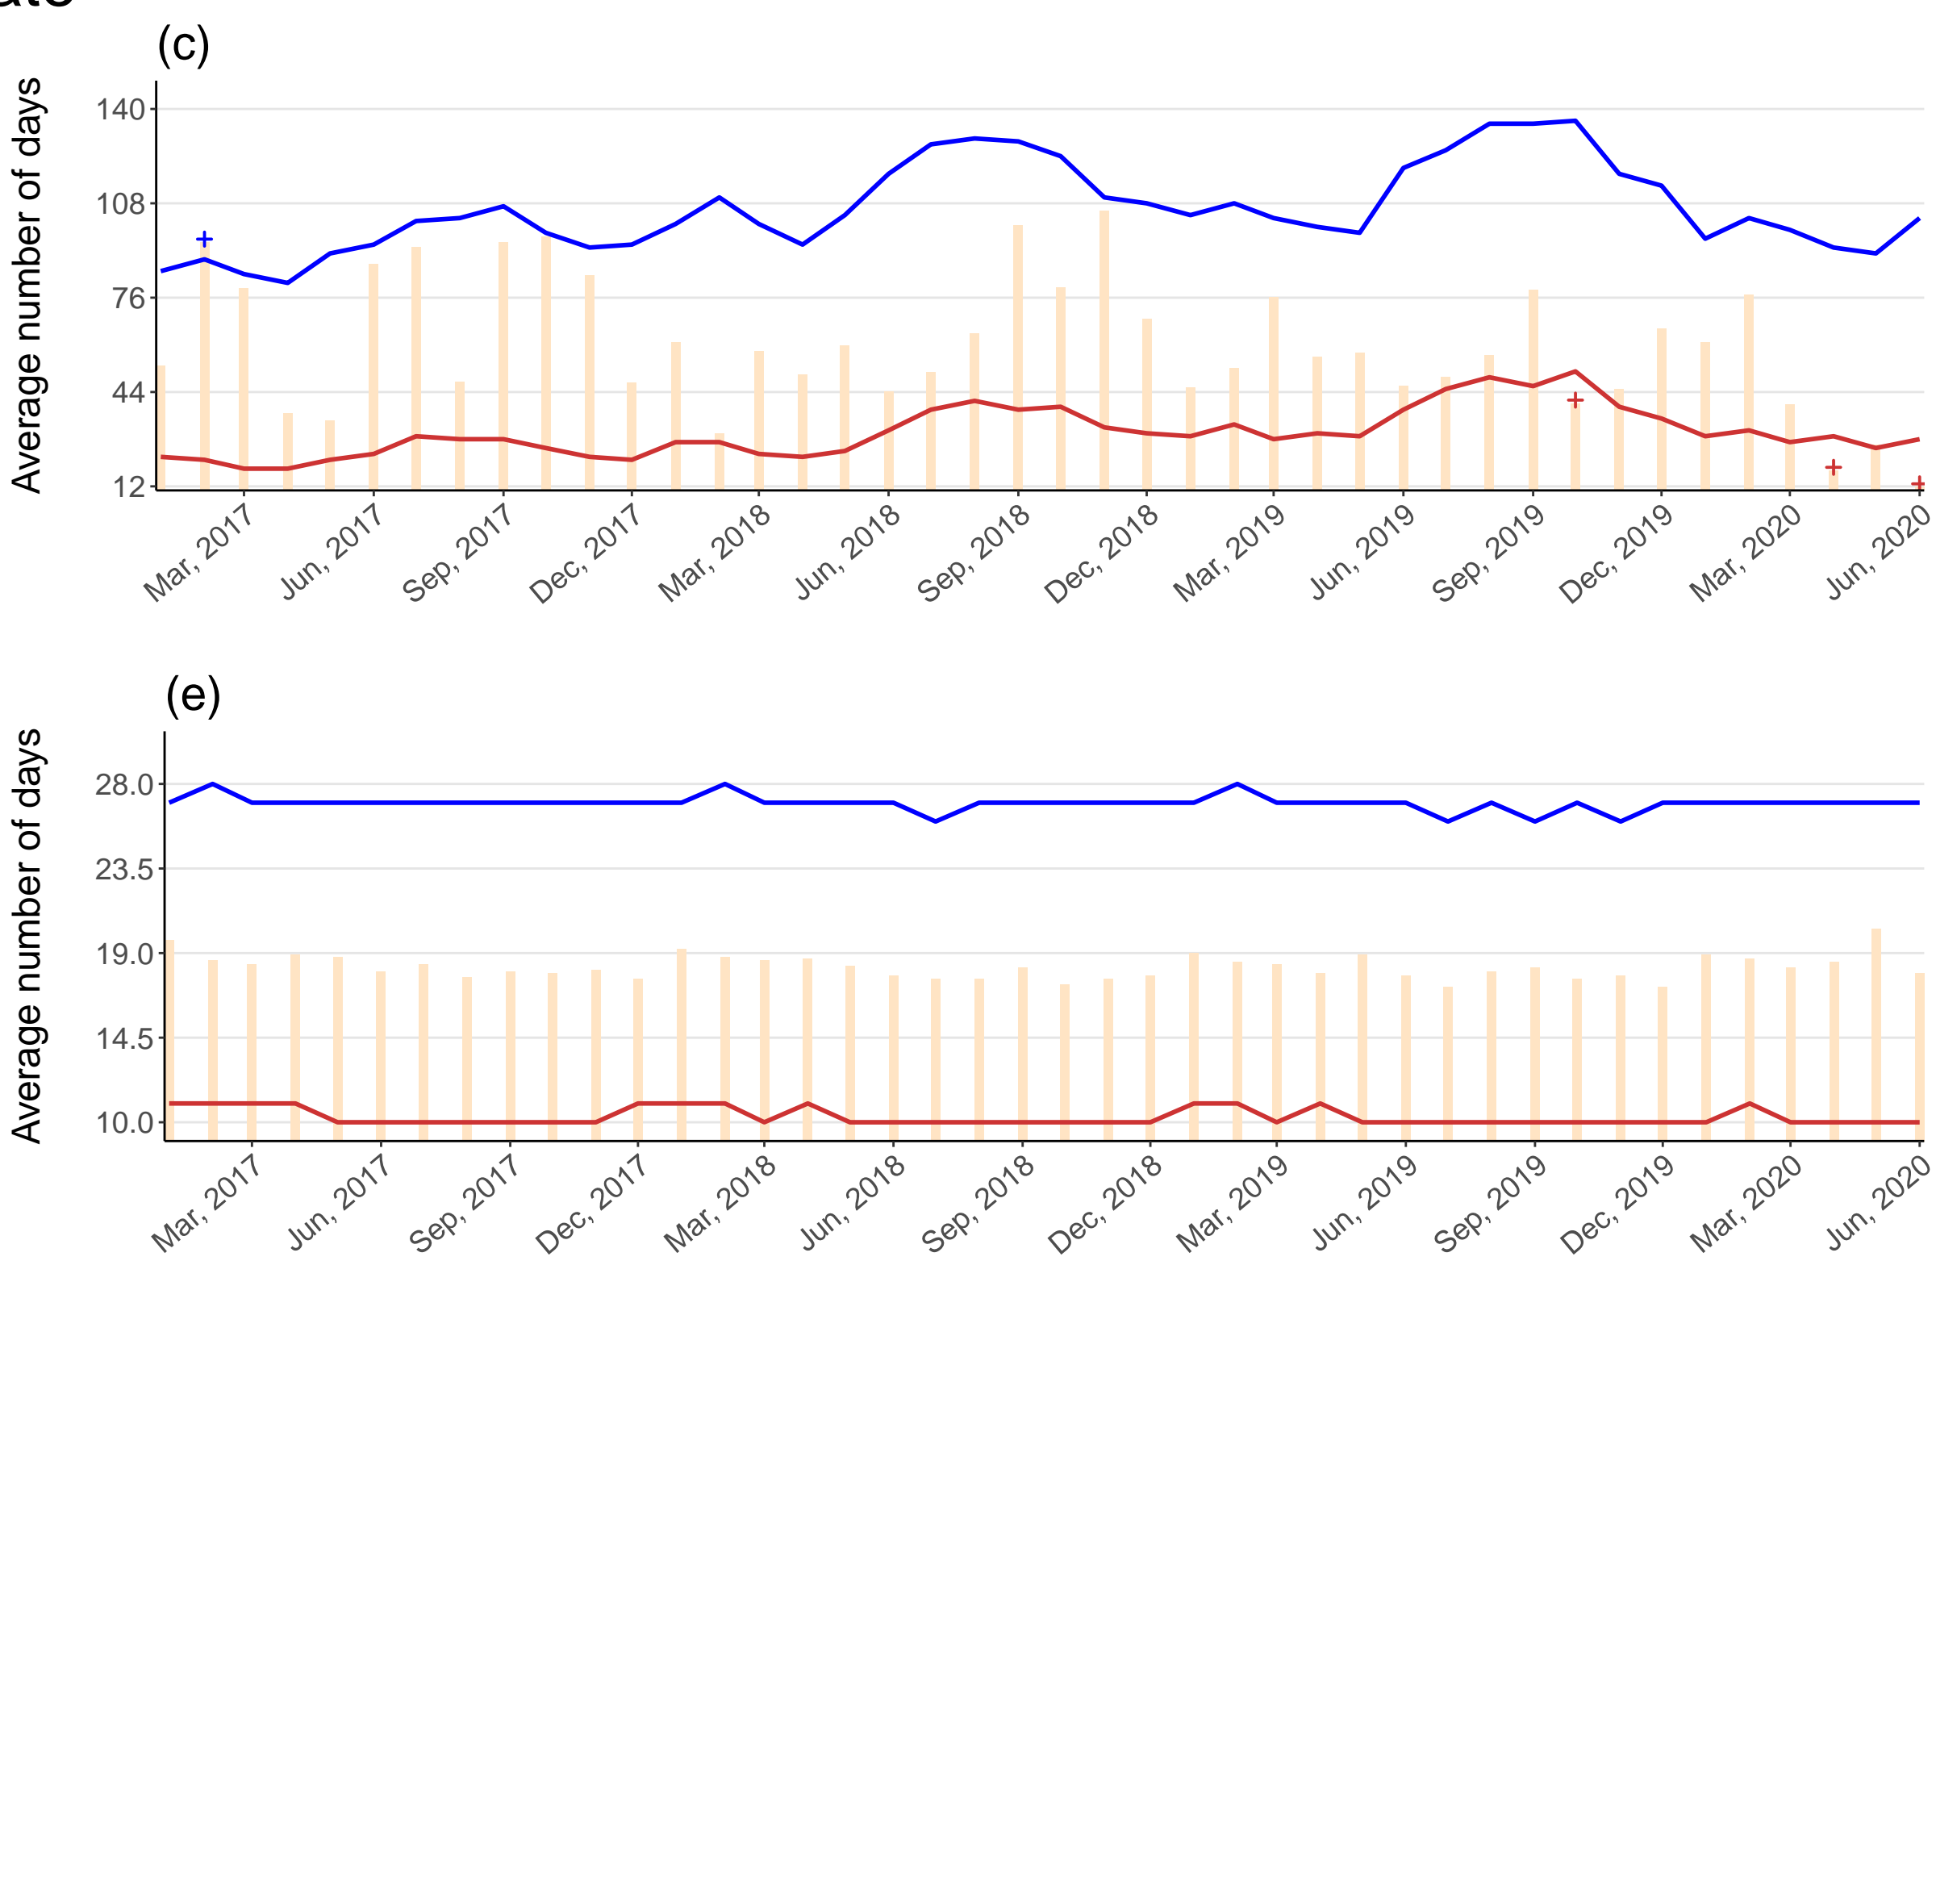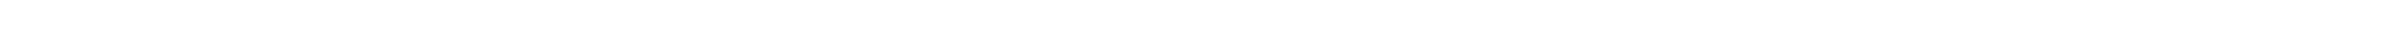



Miyagi

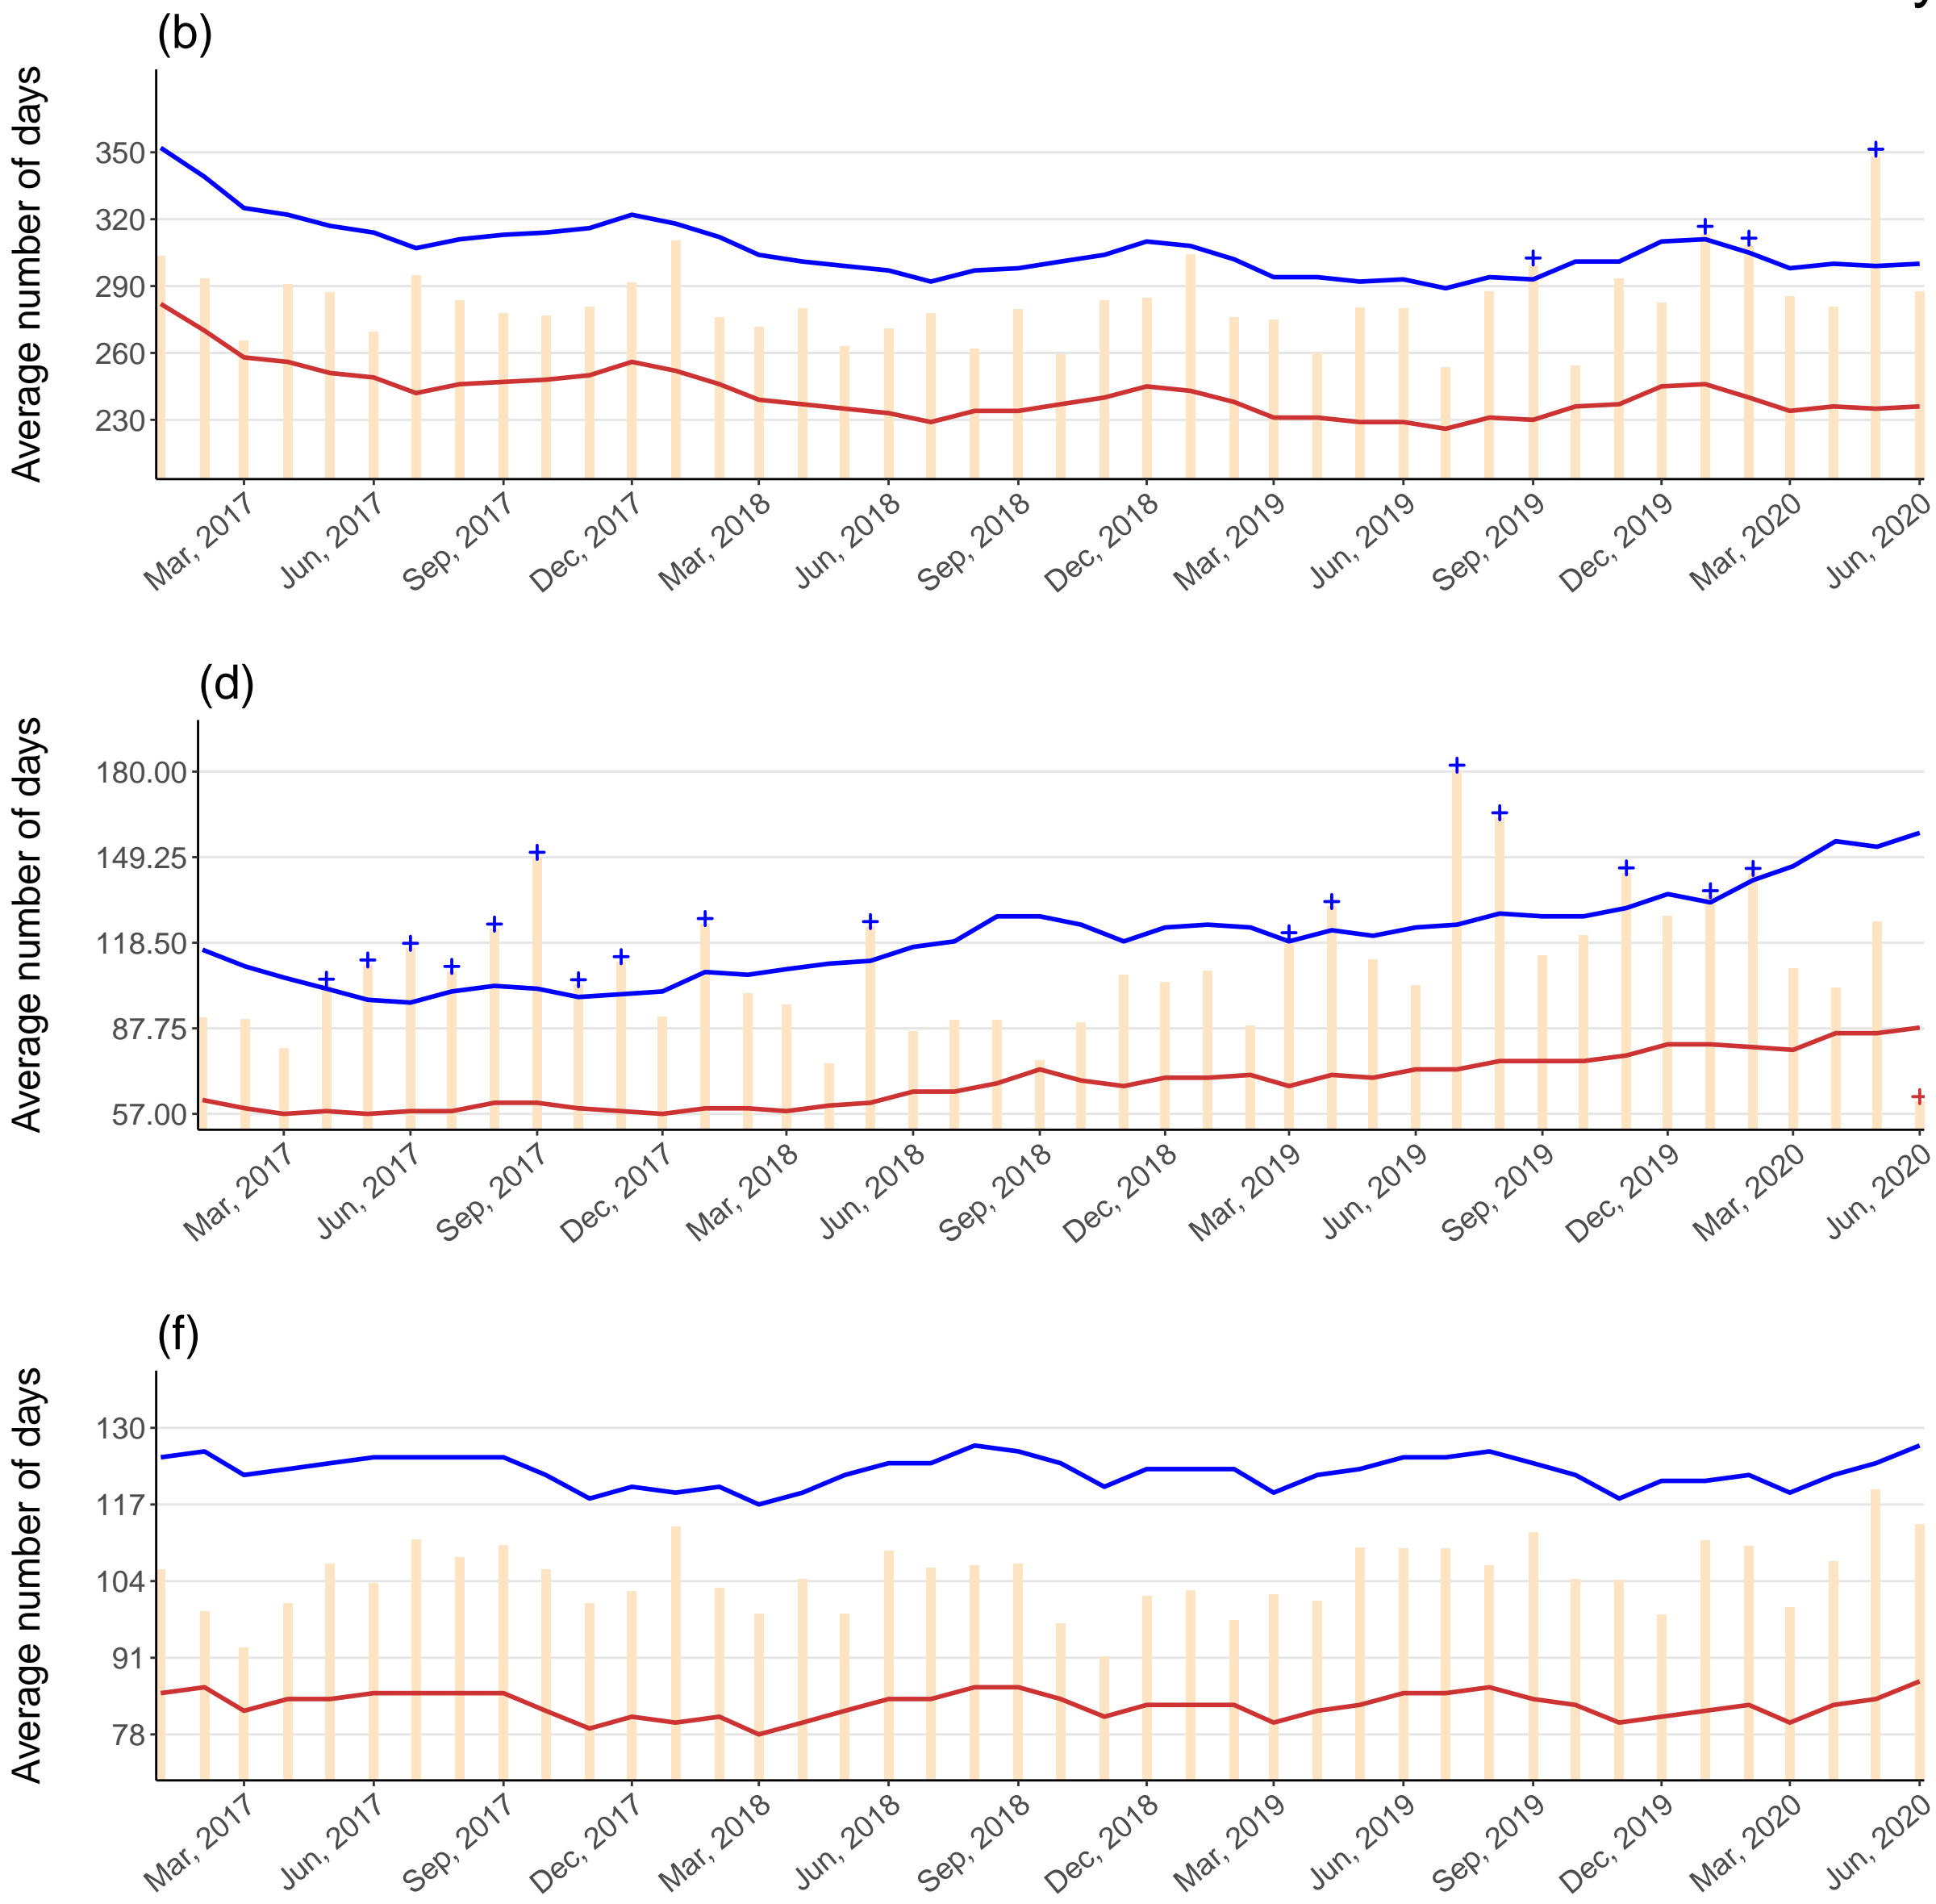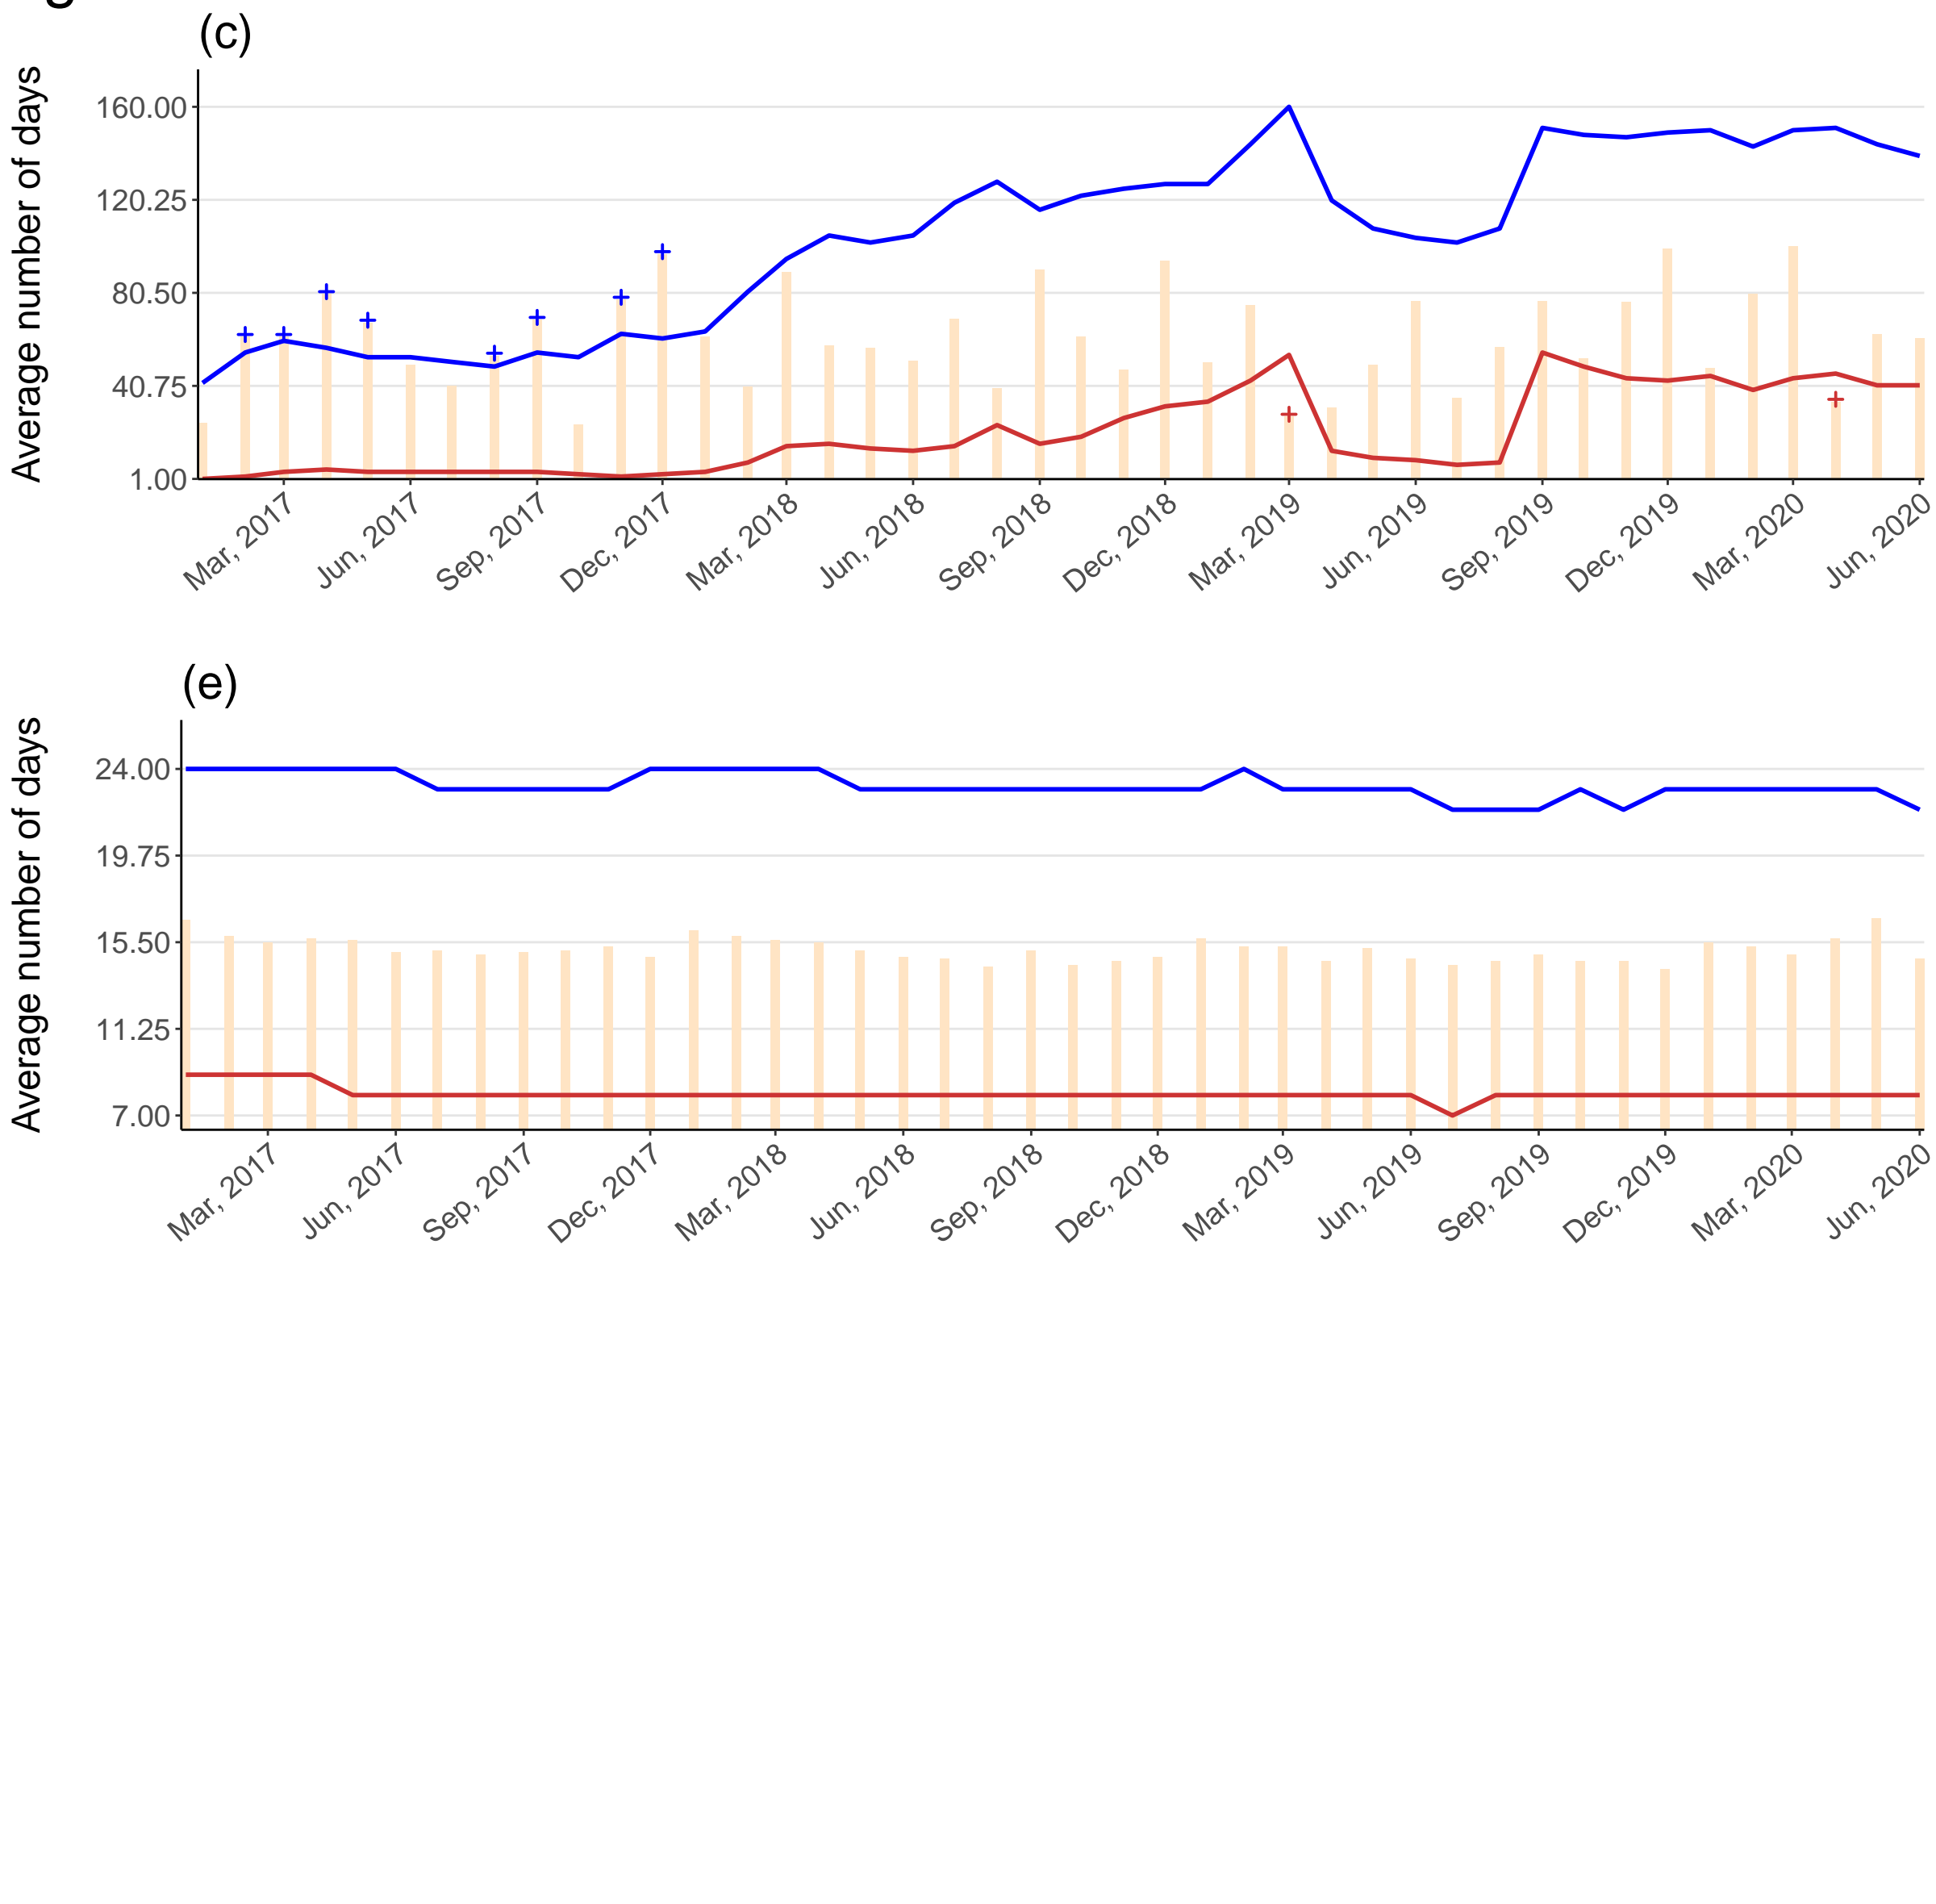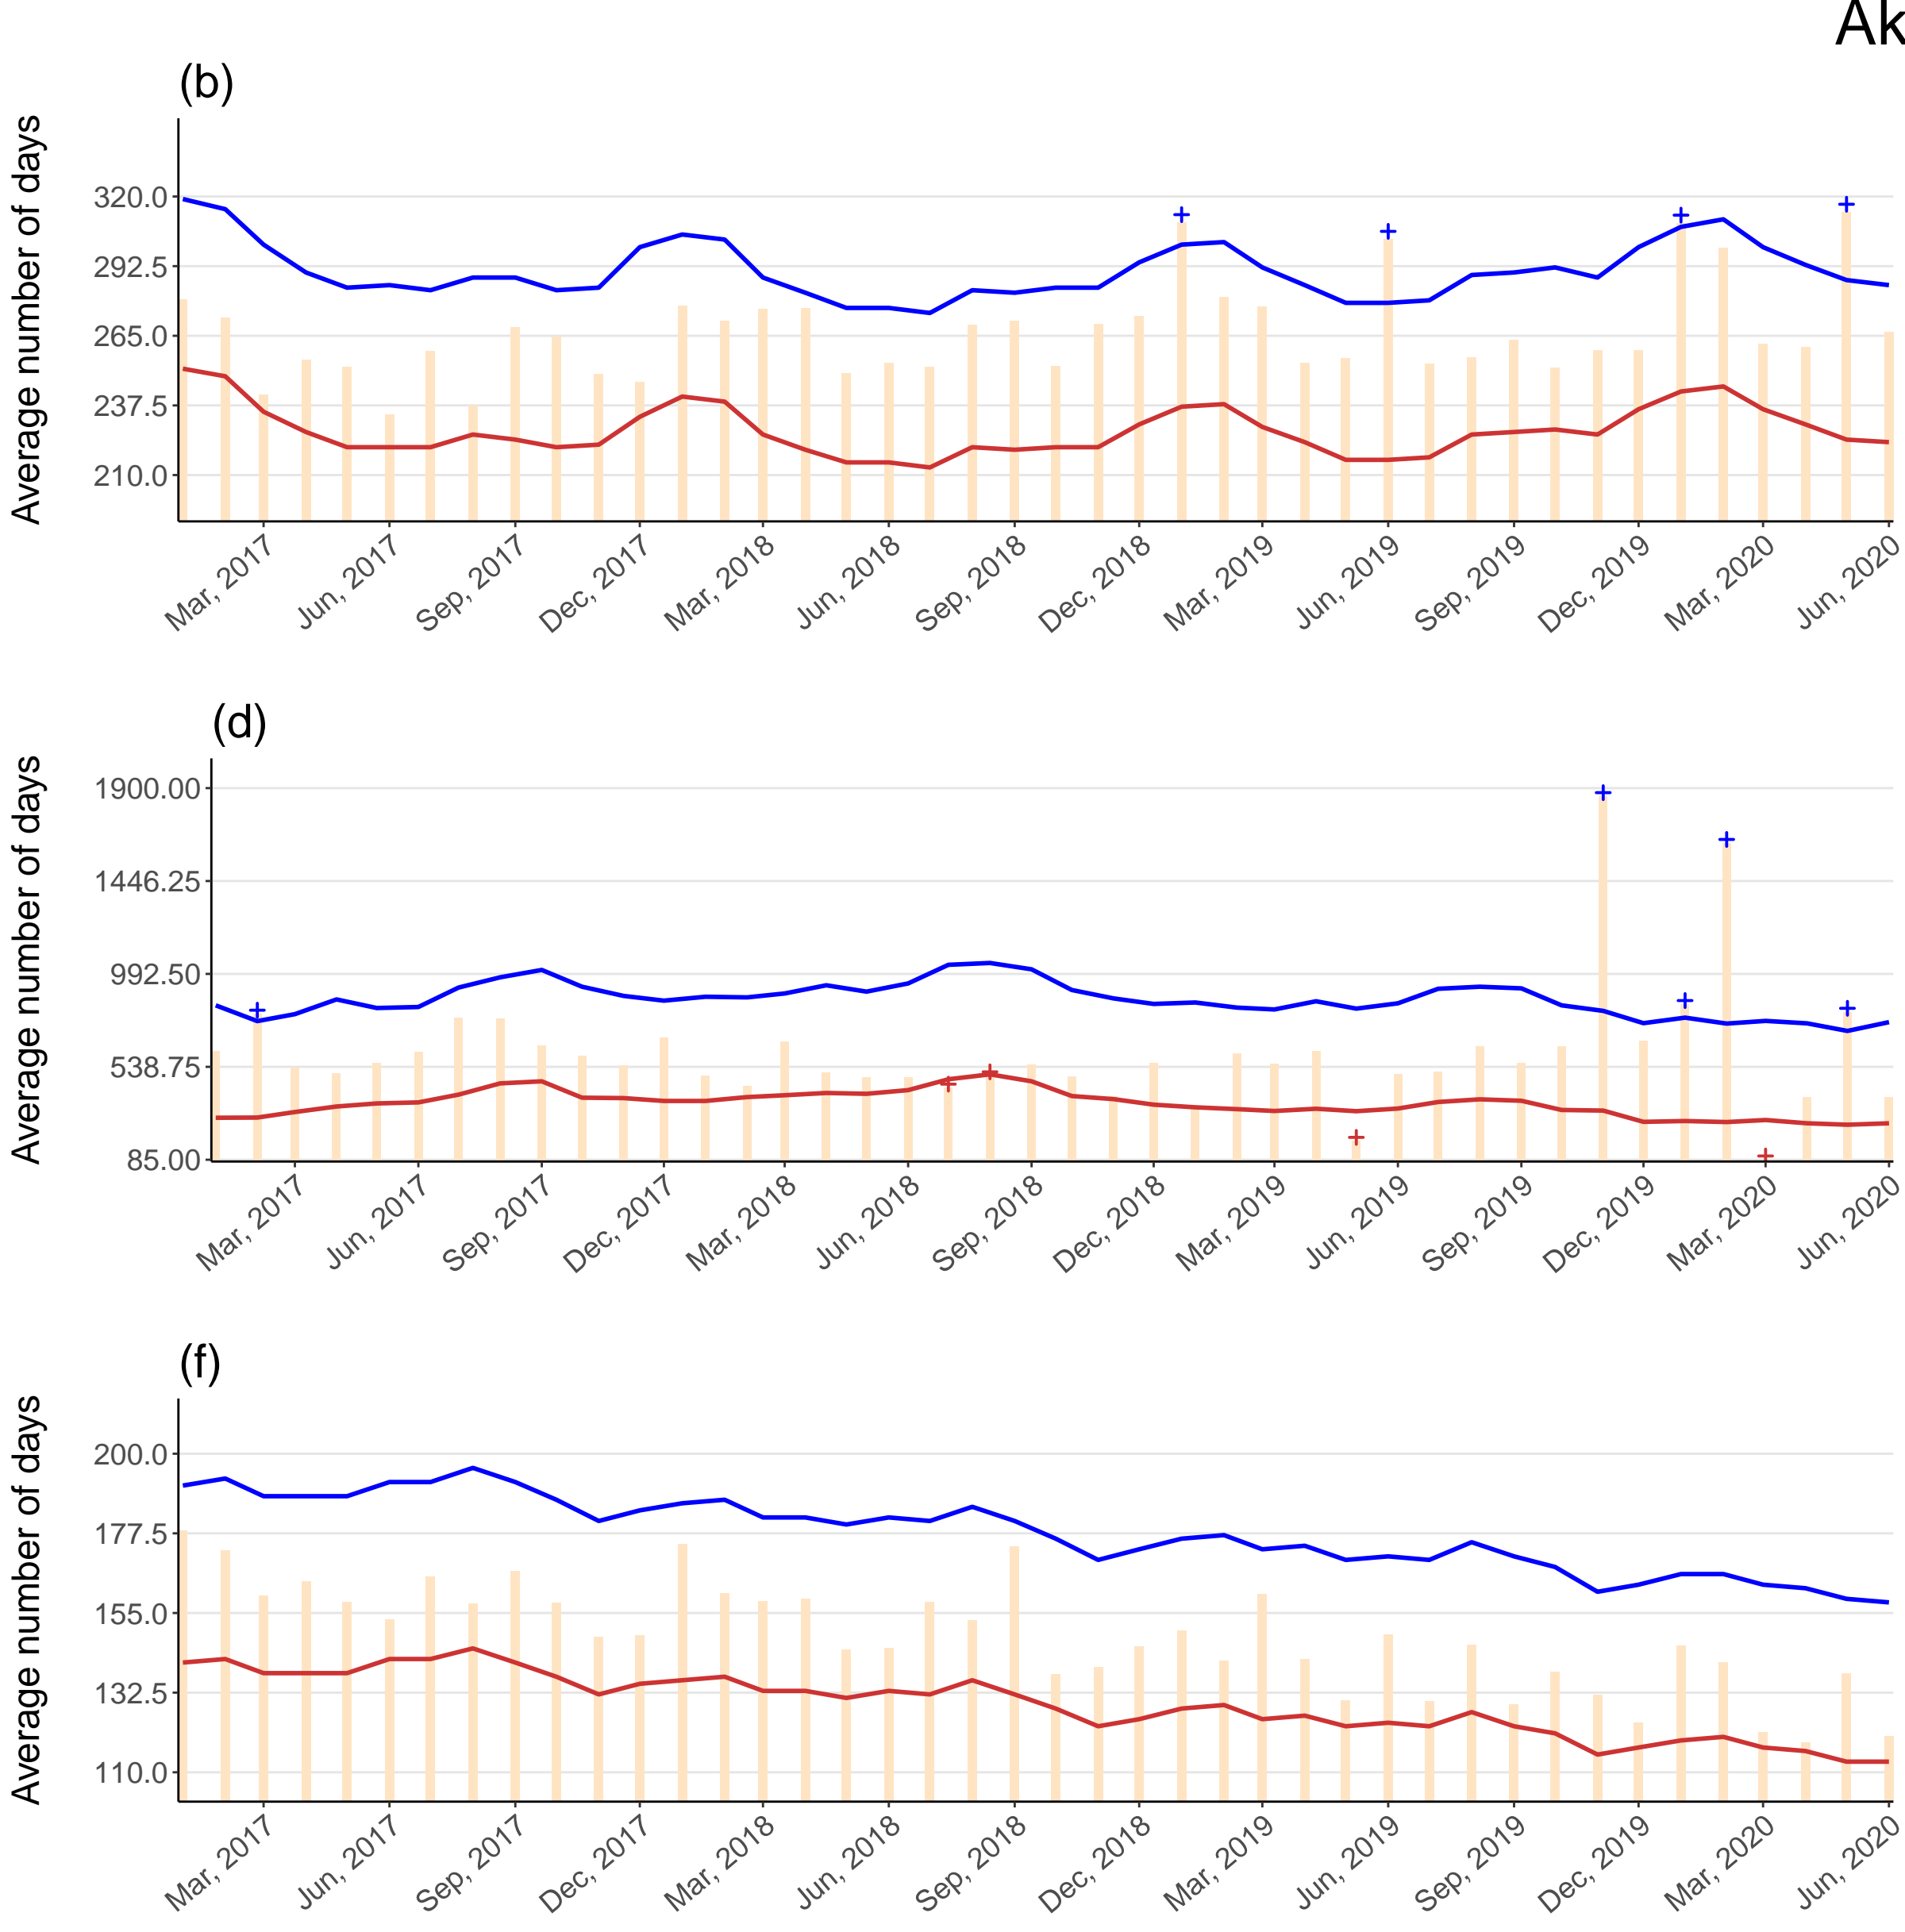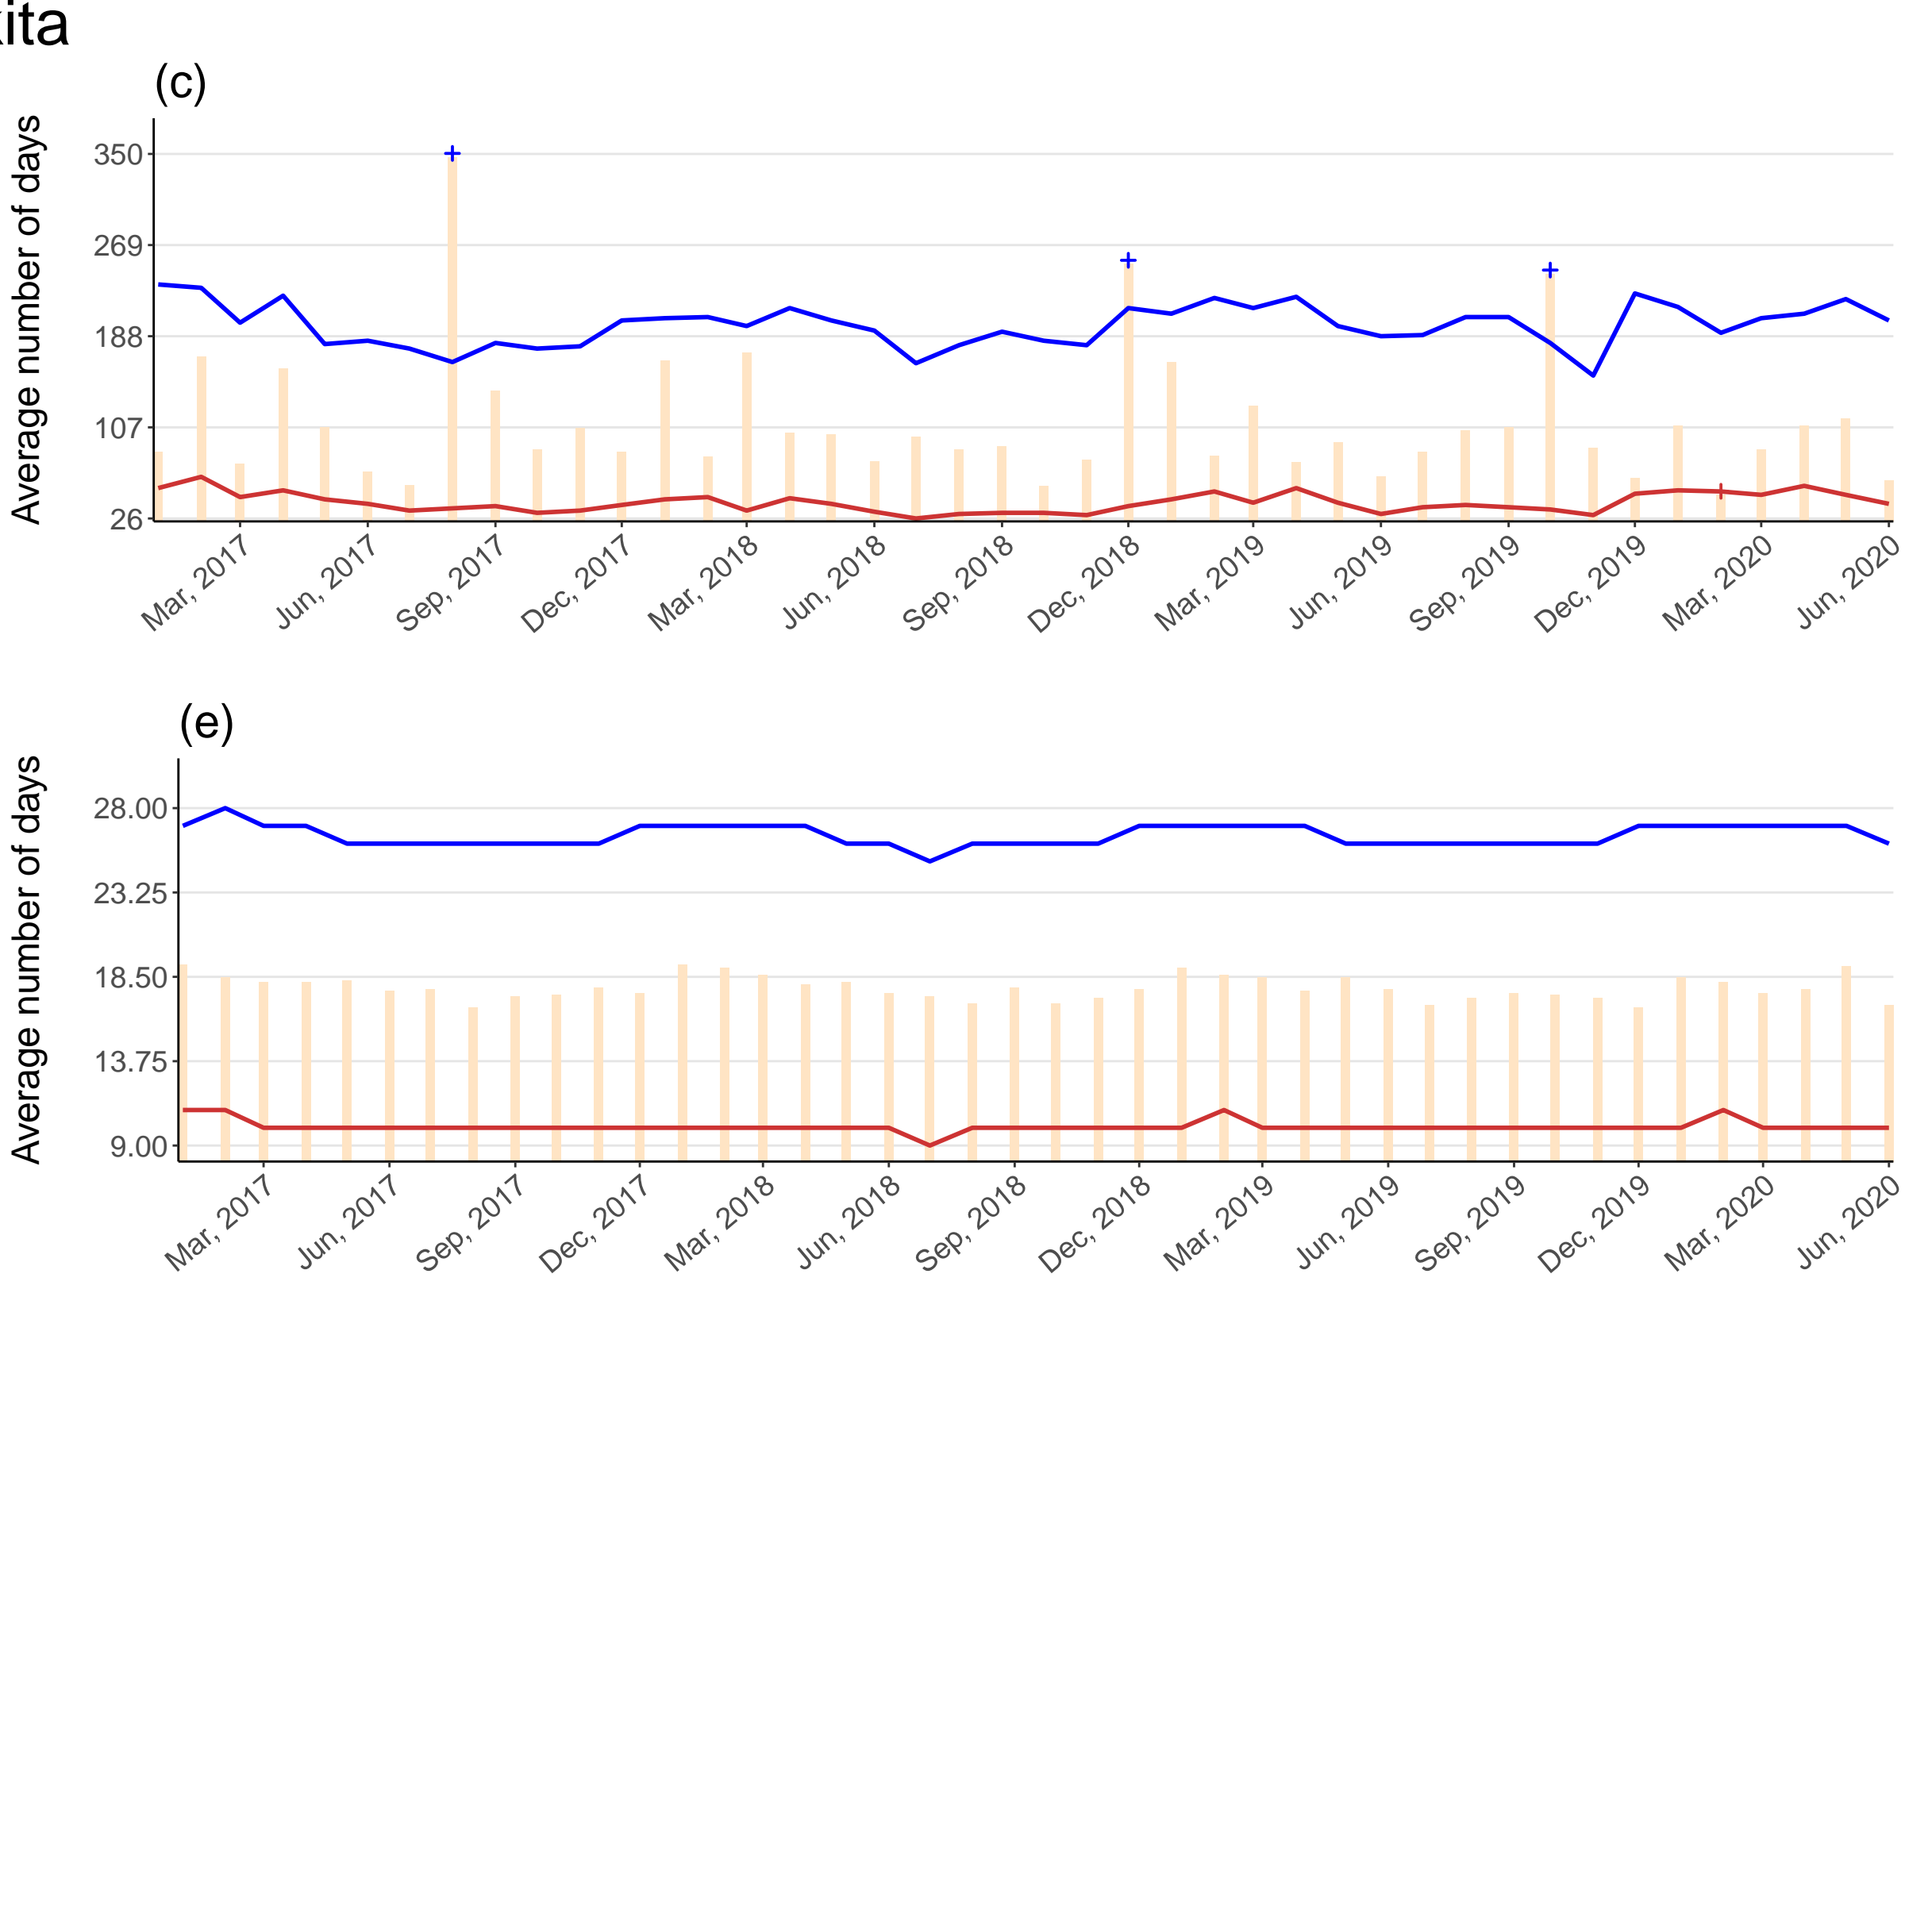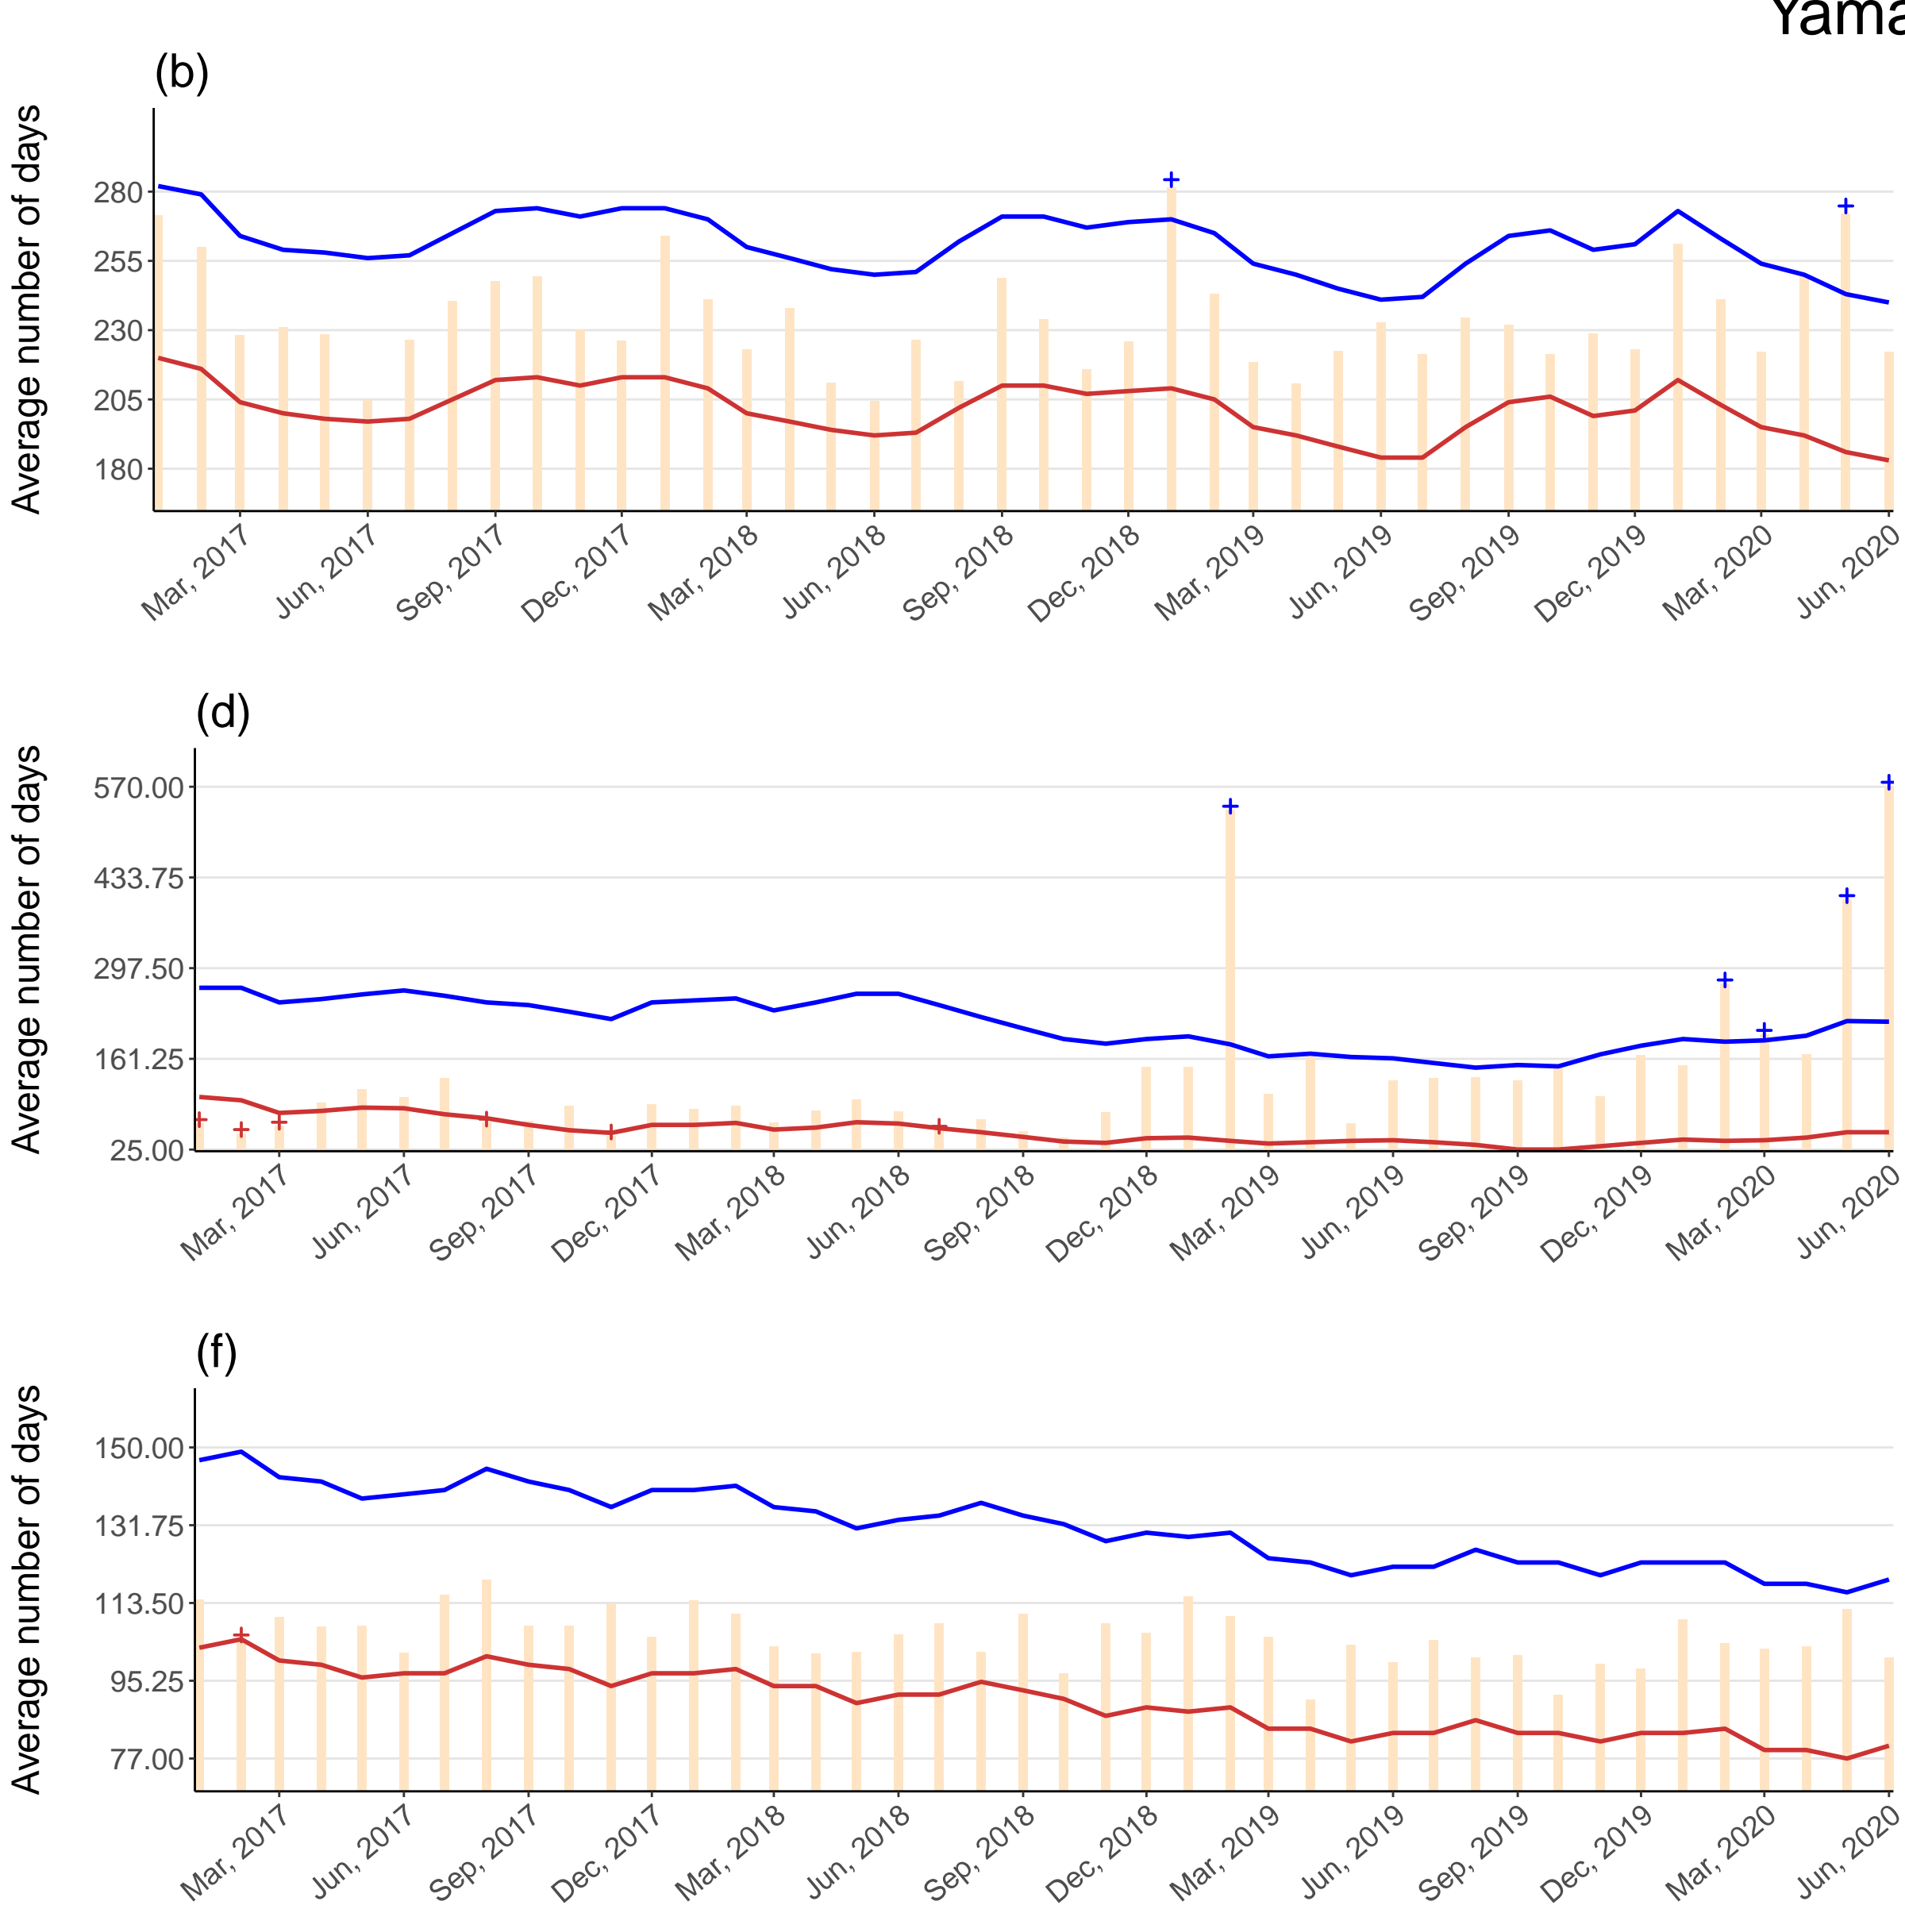

Akita

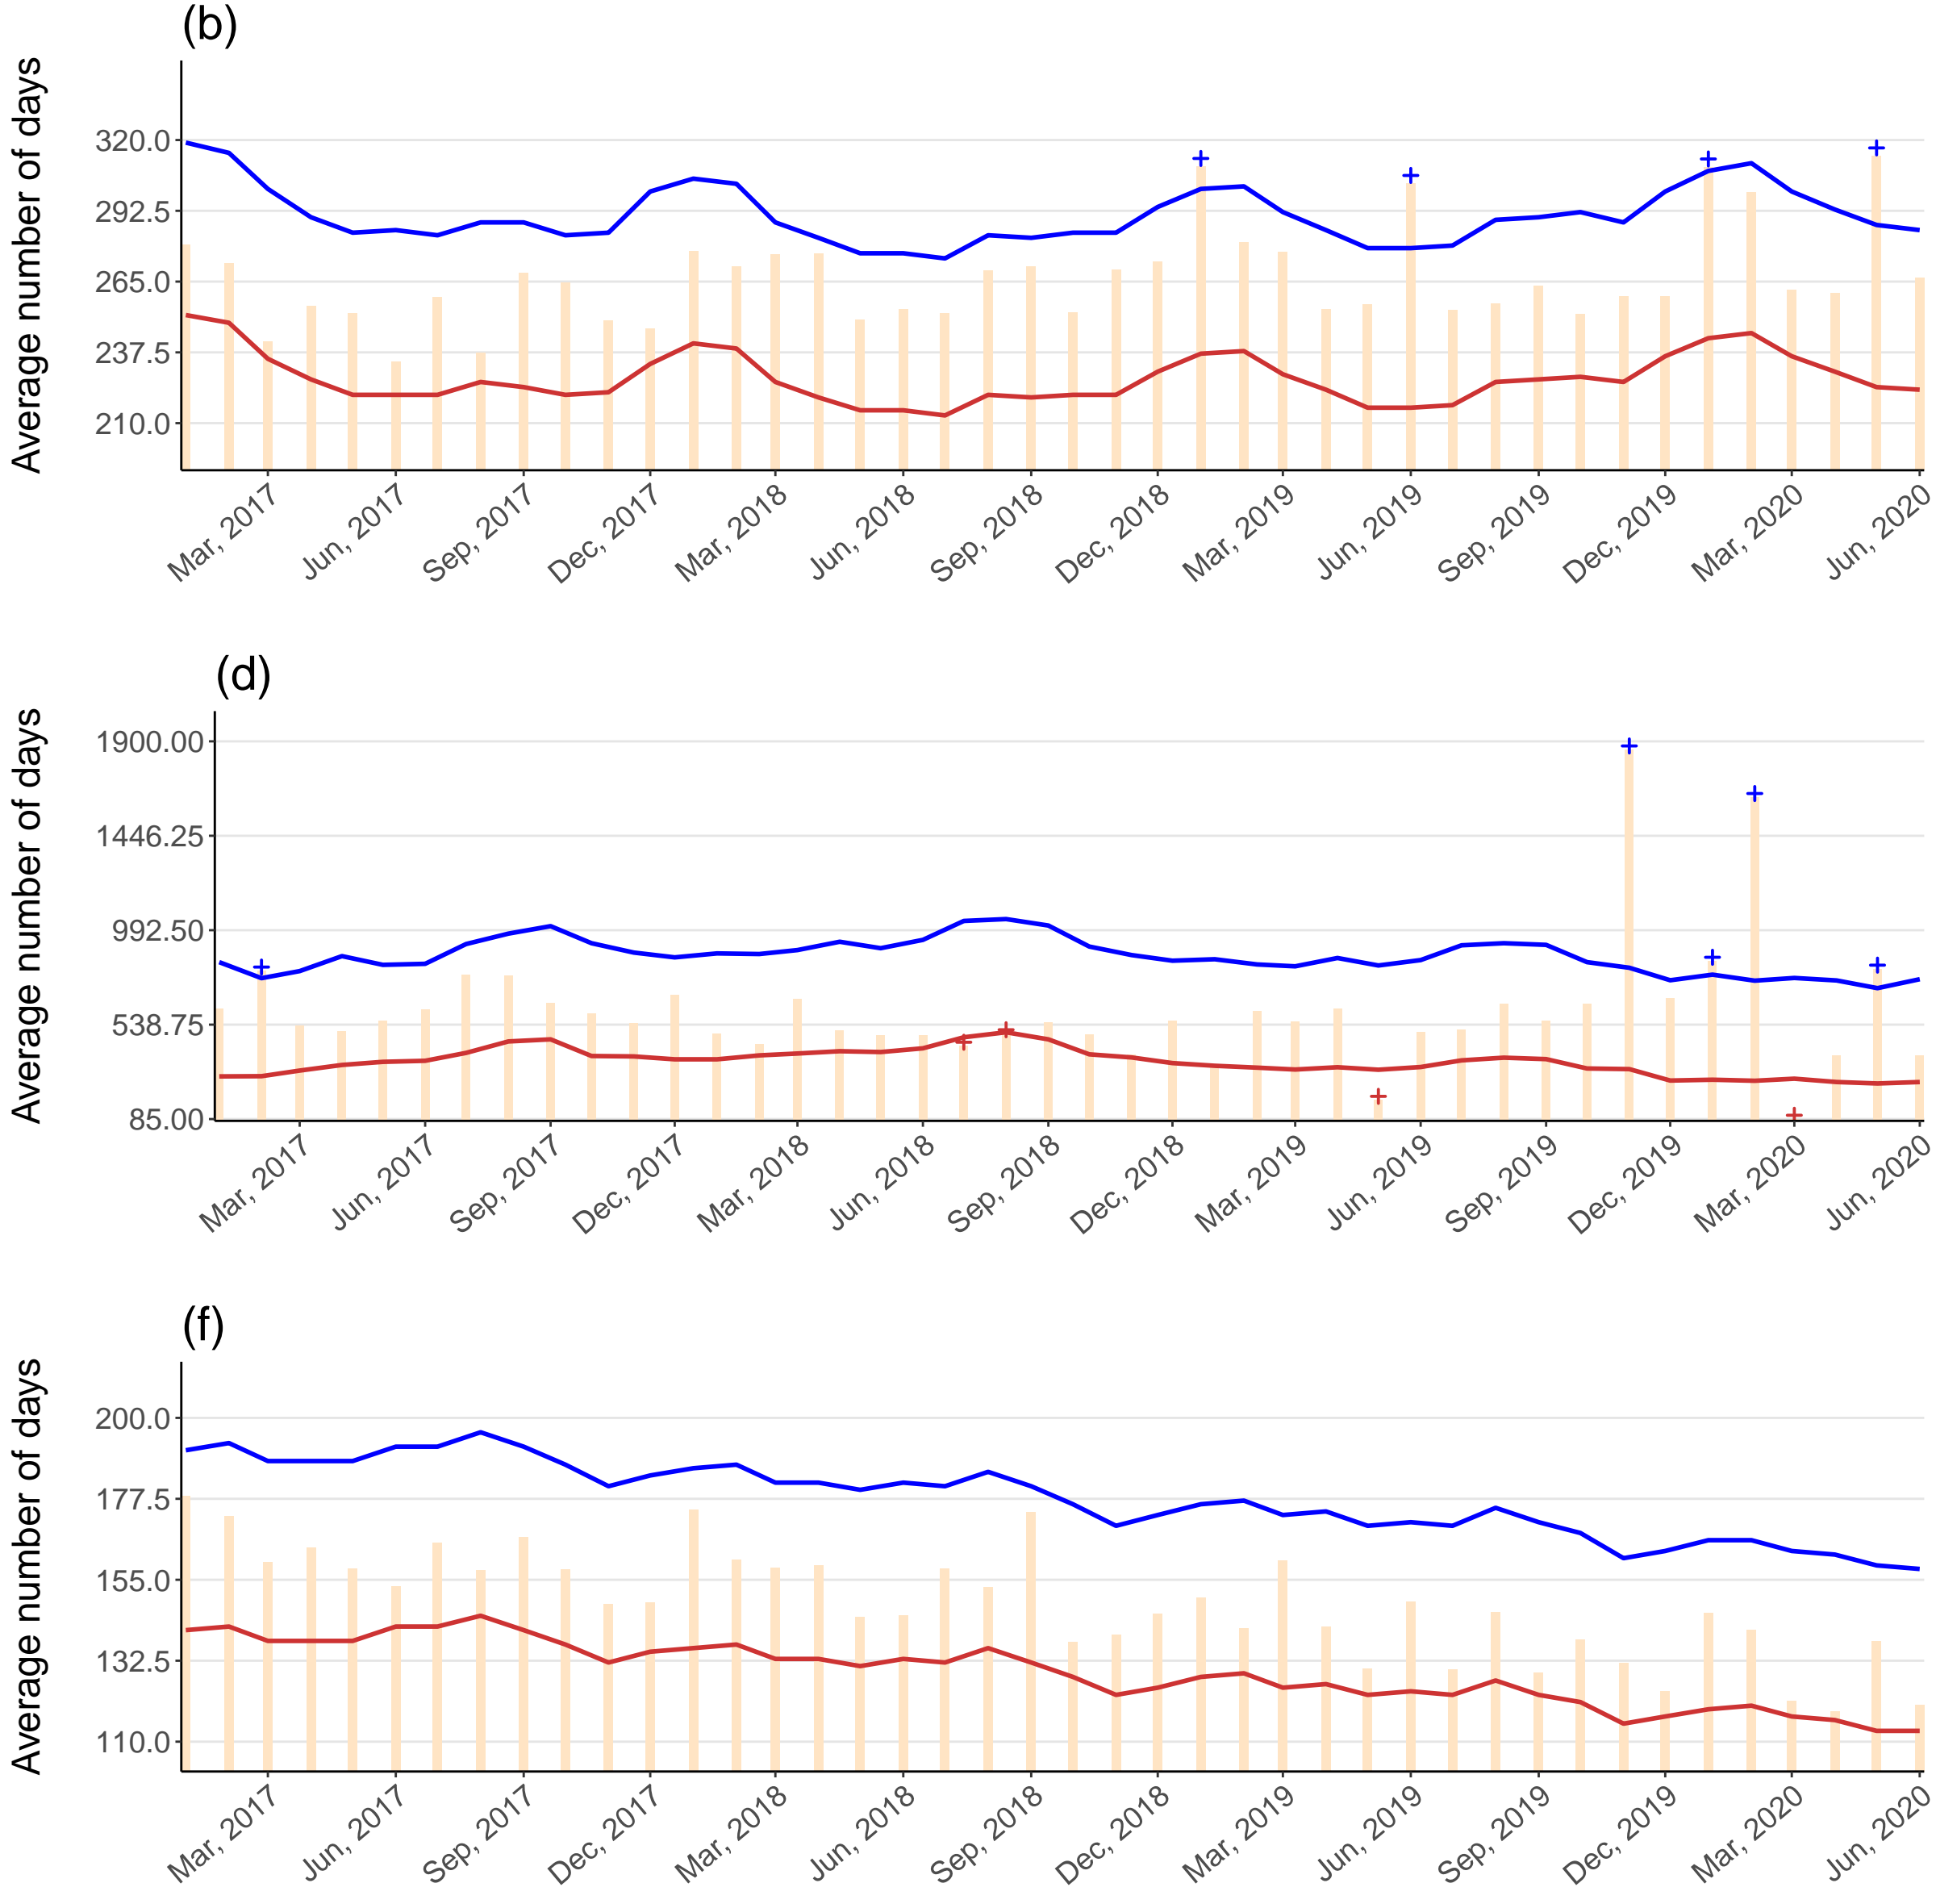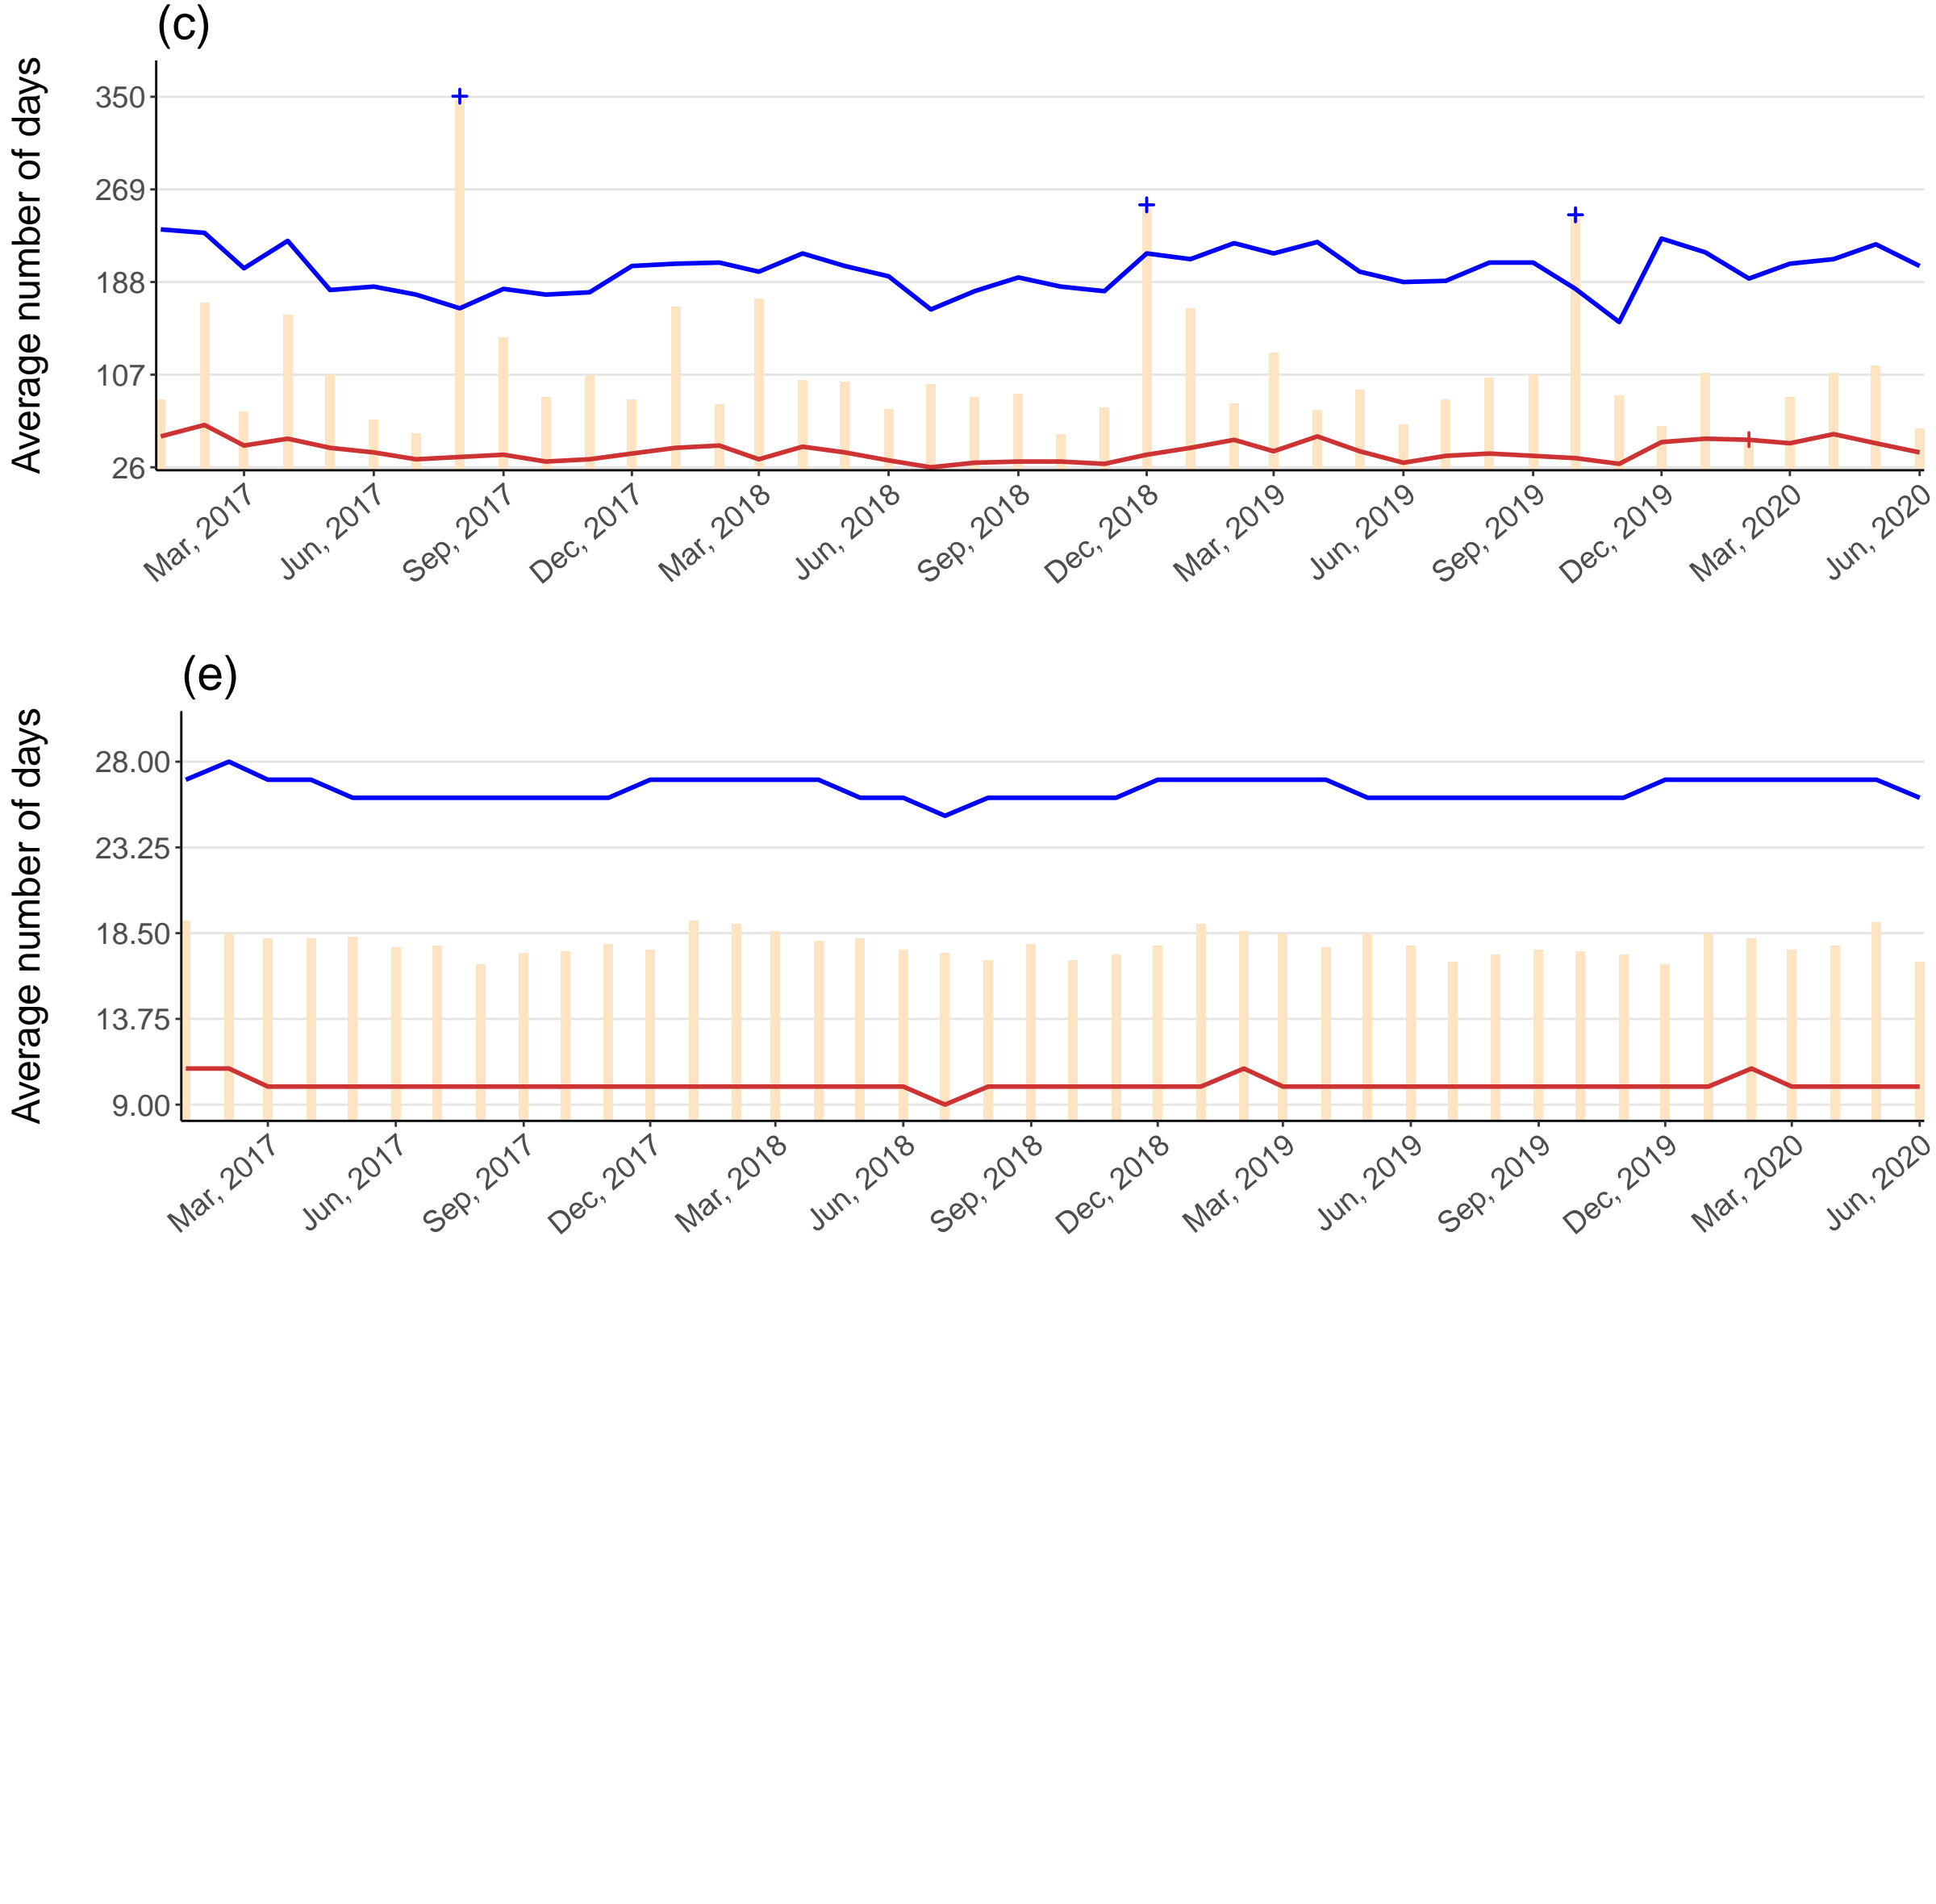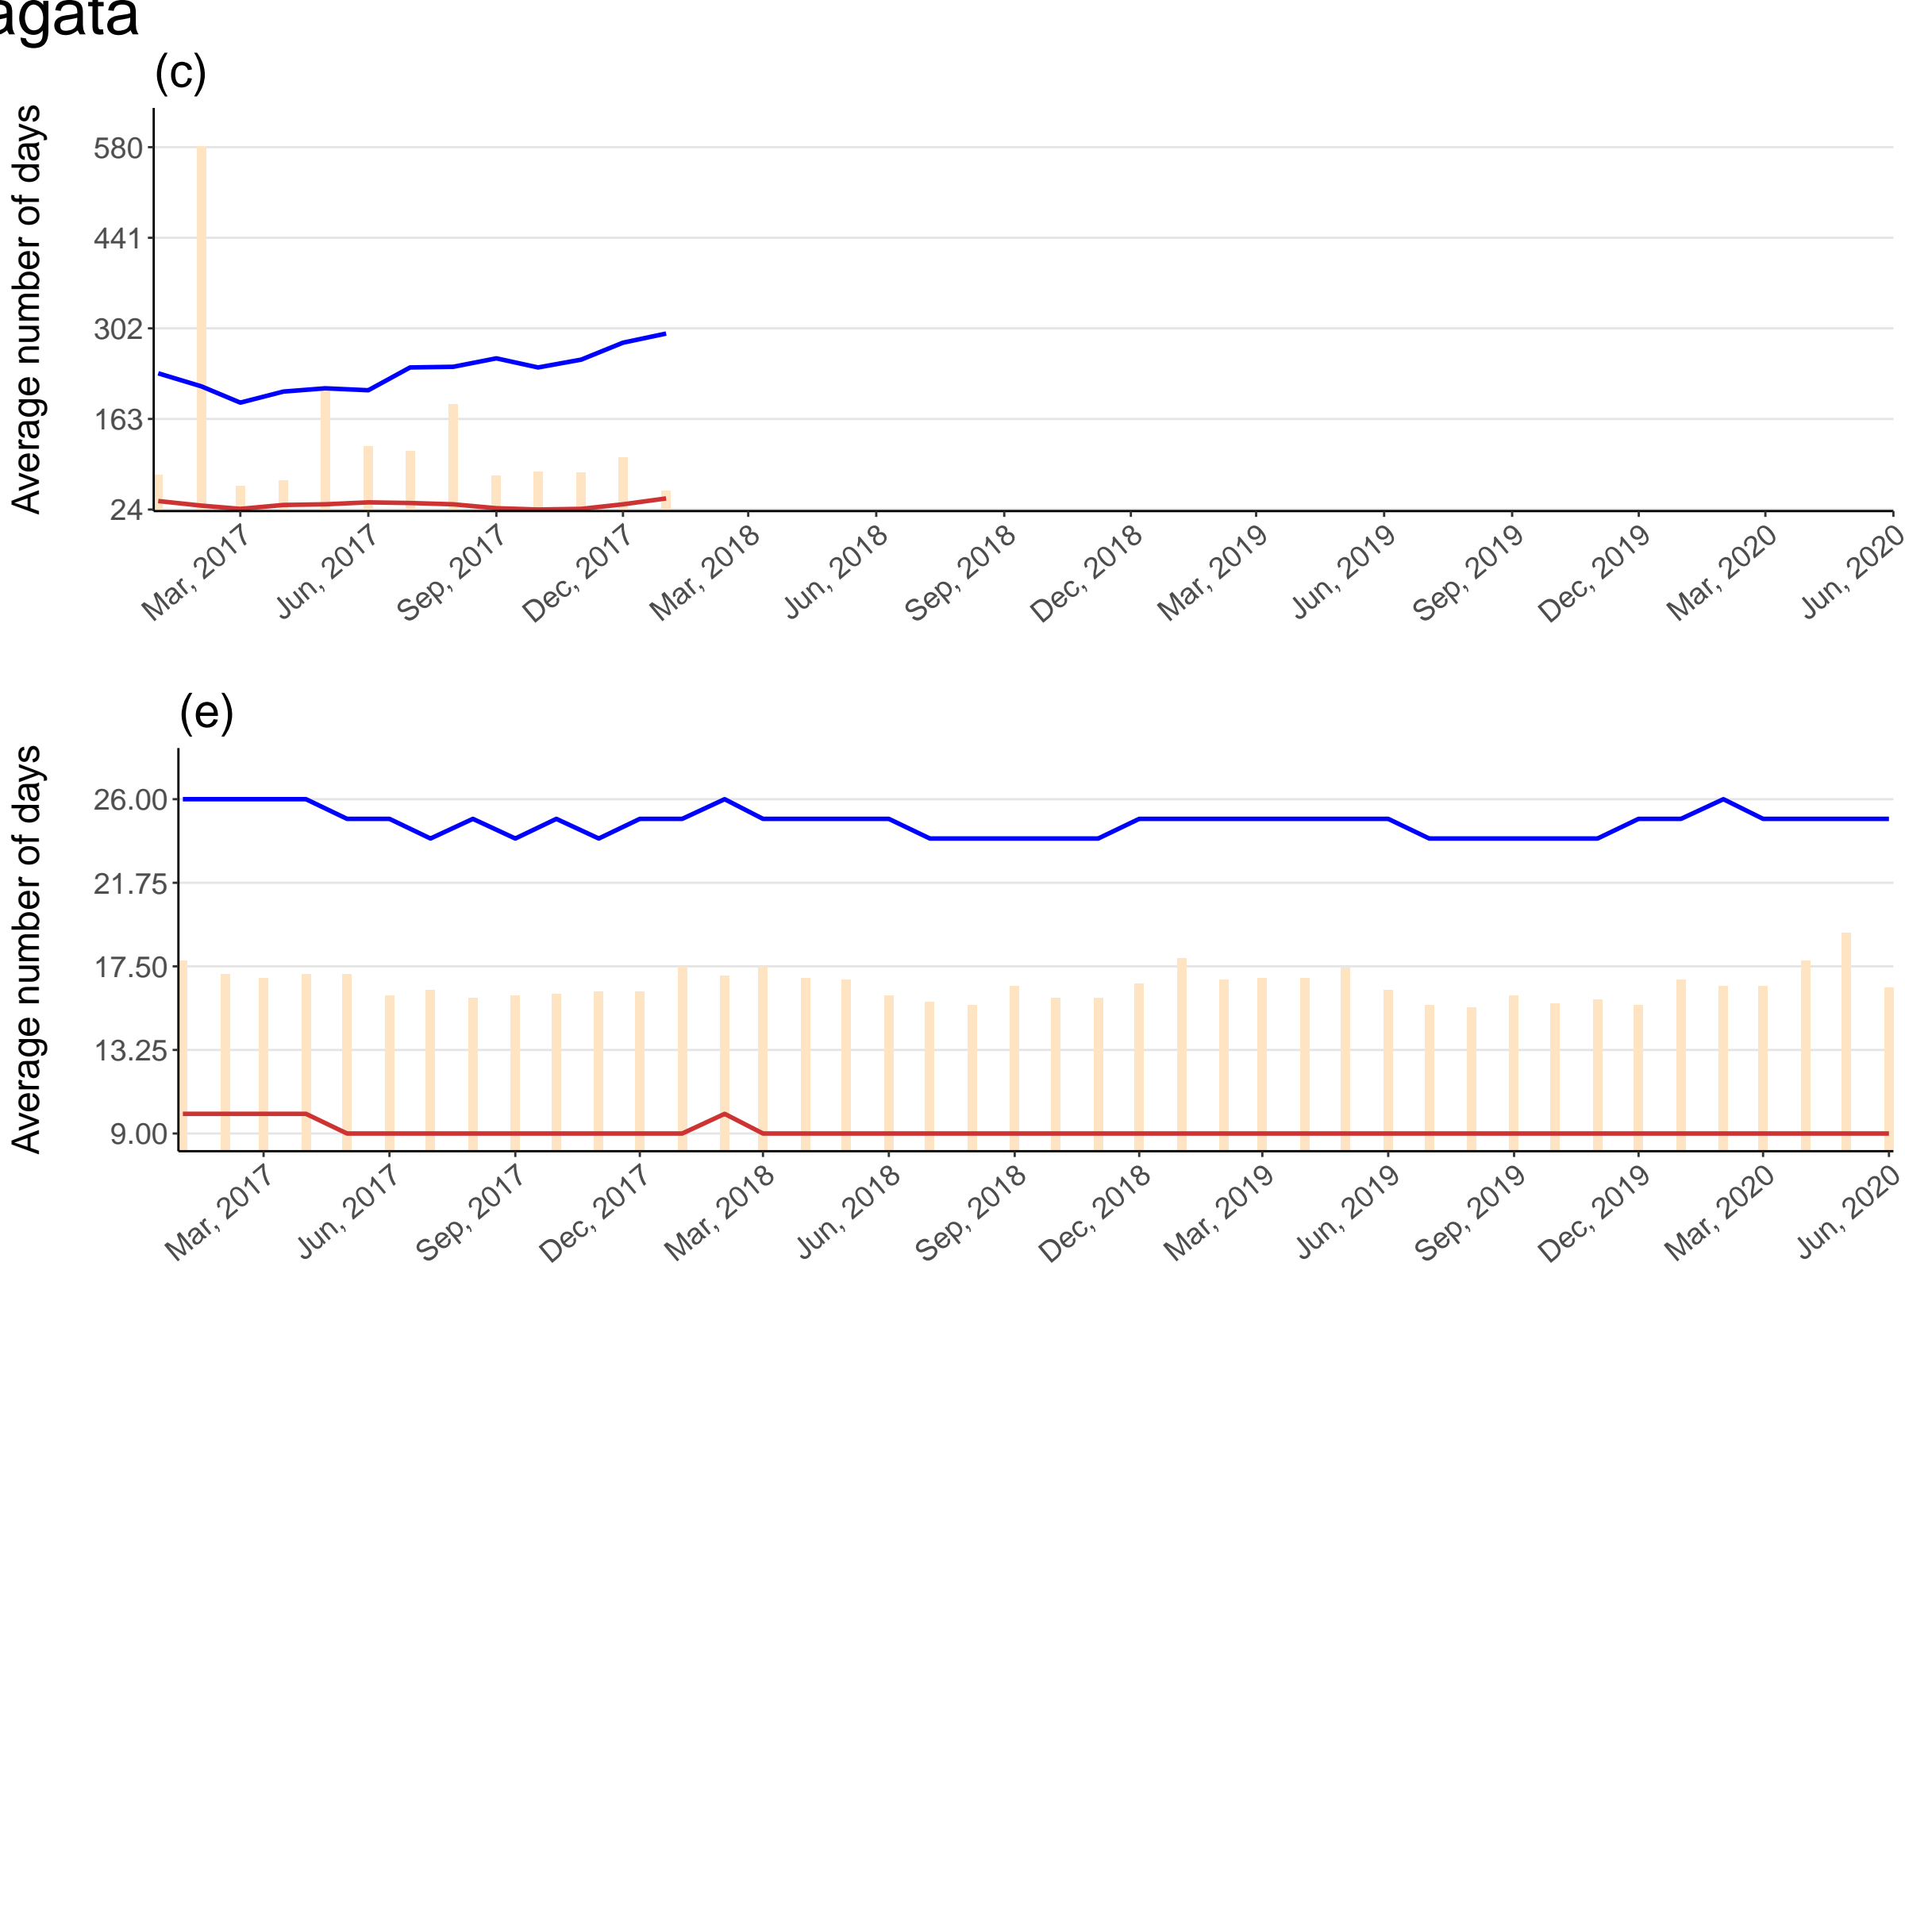

Yamagata

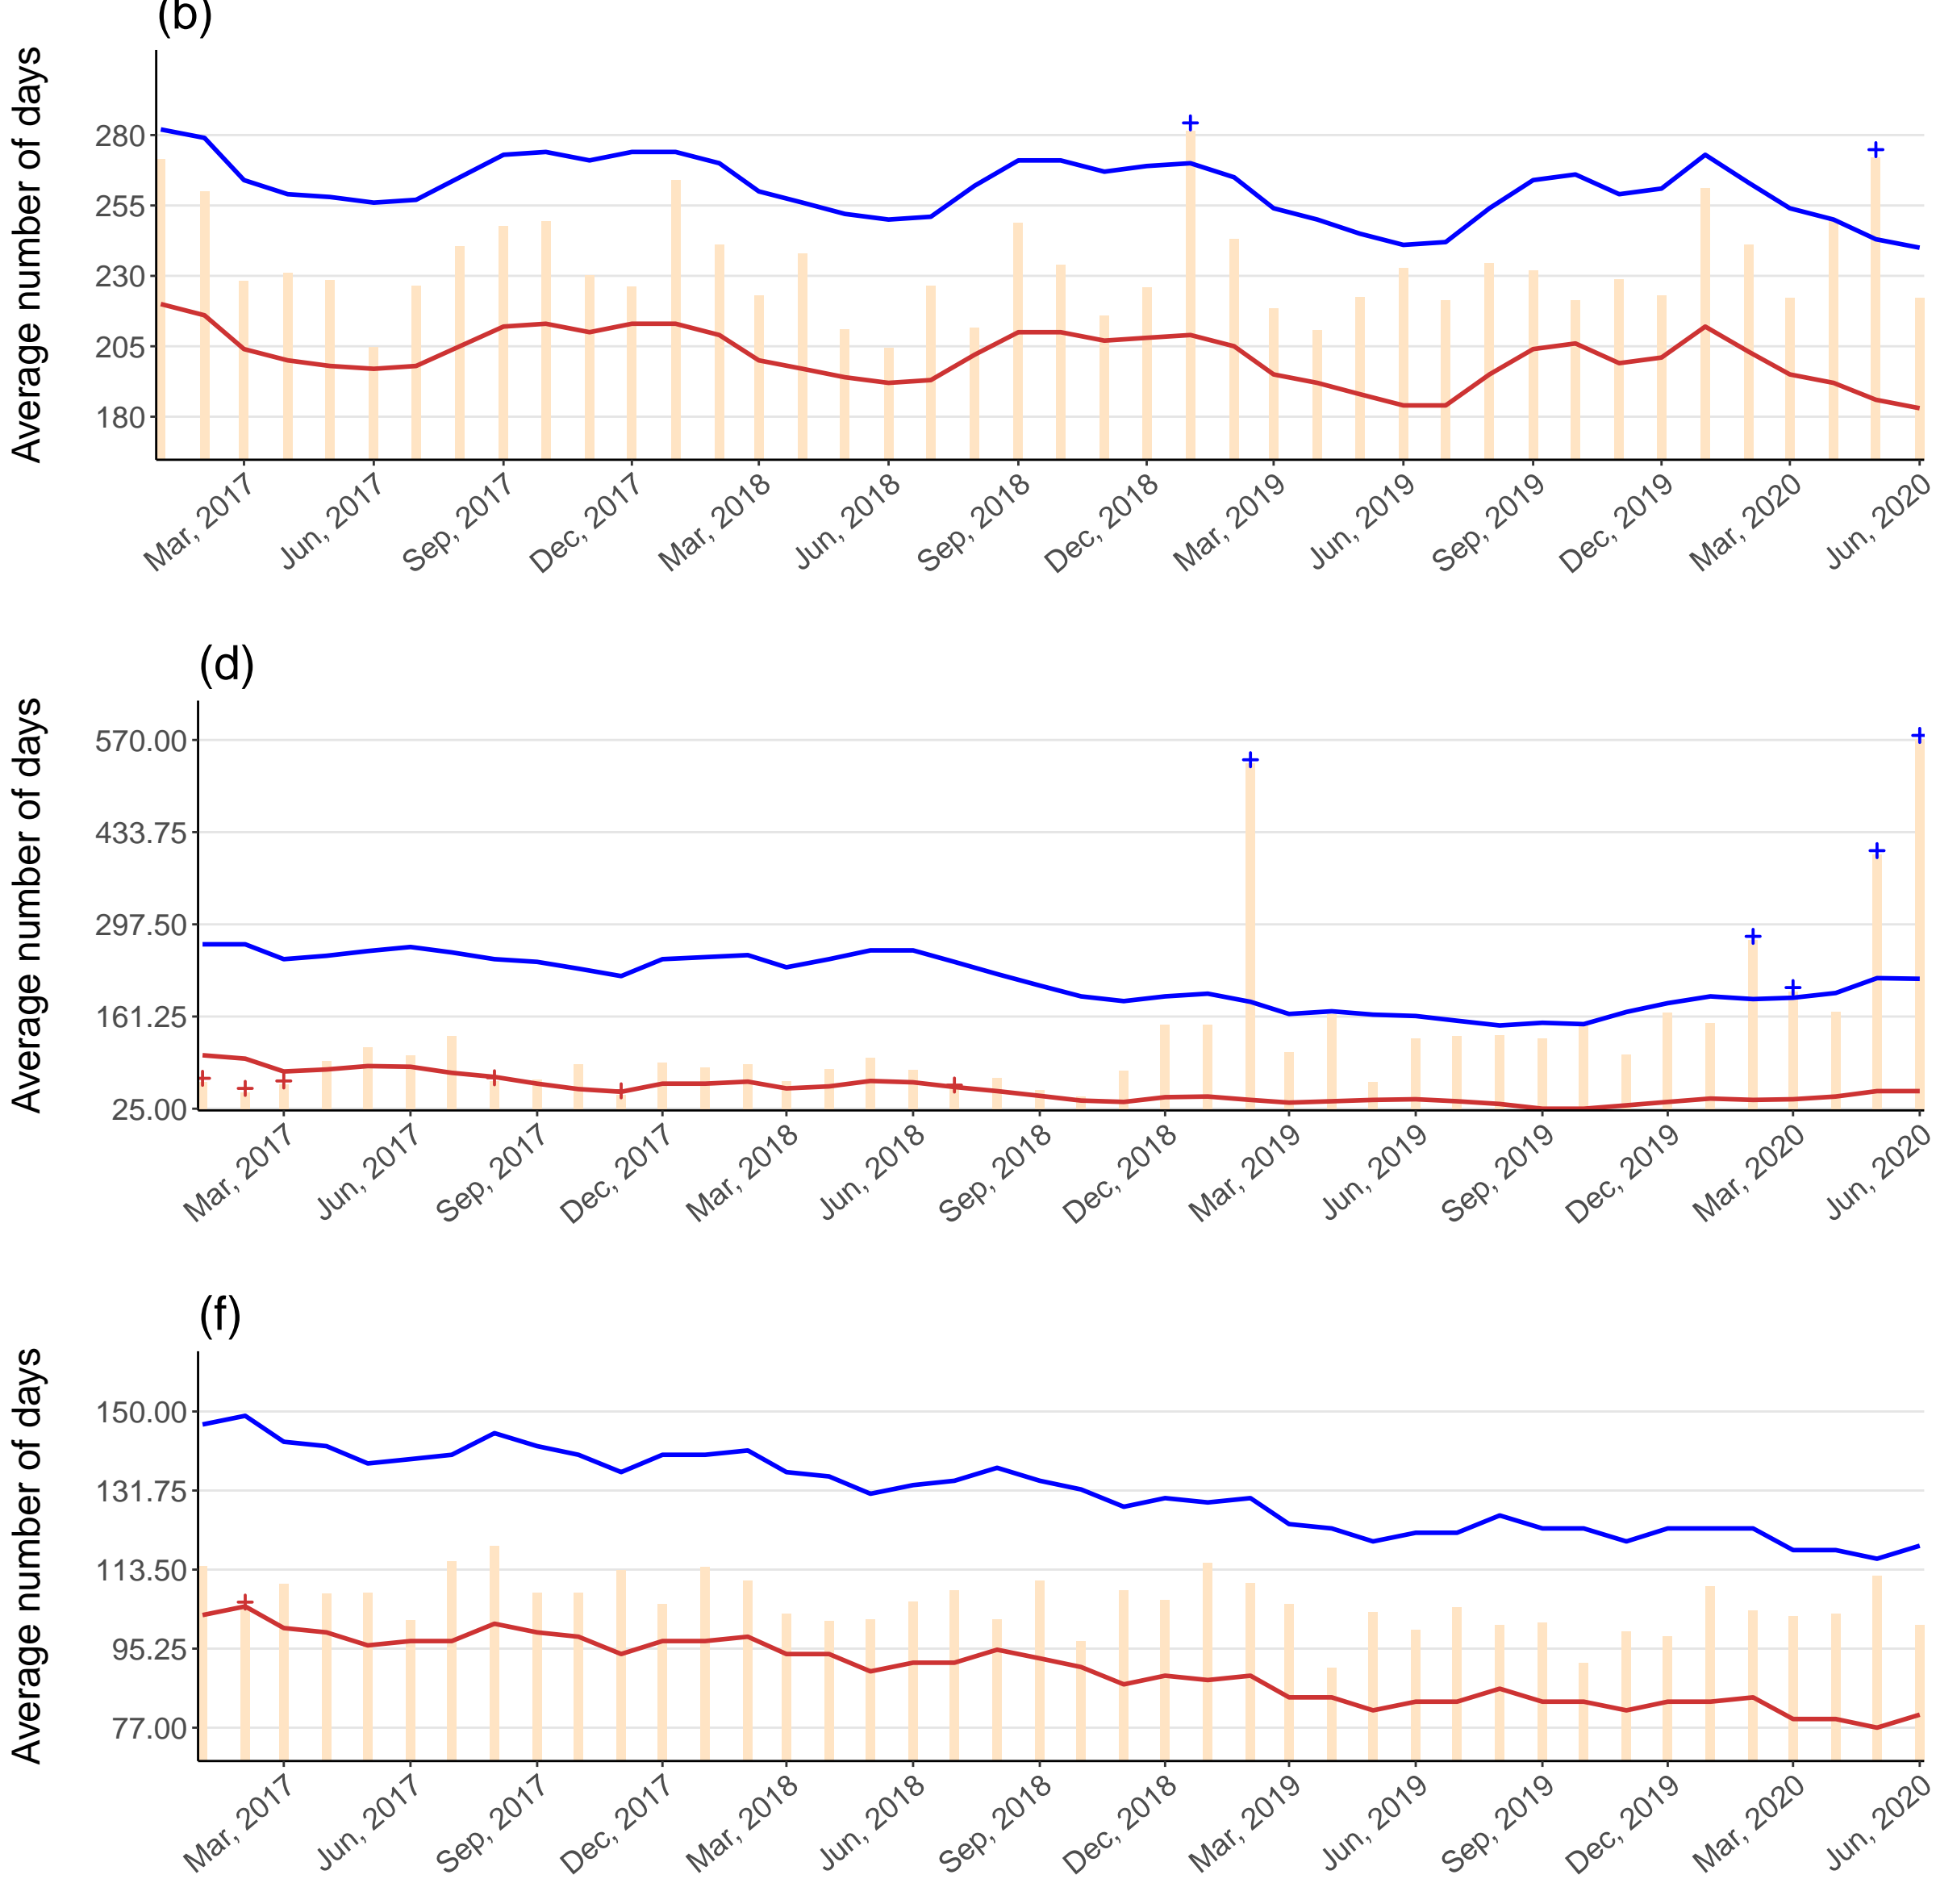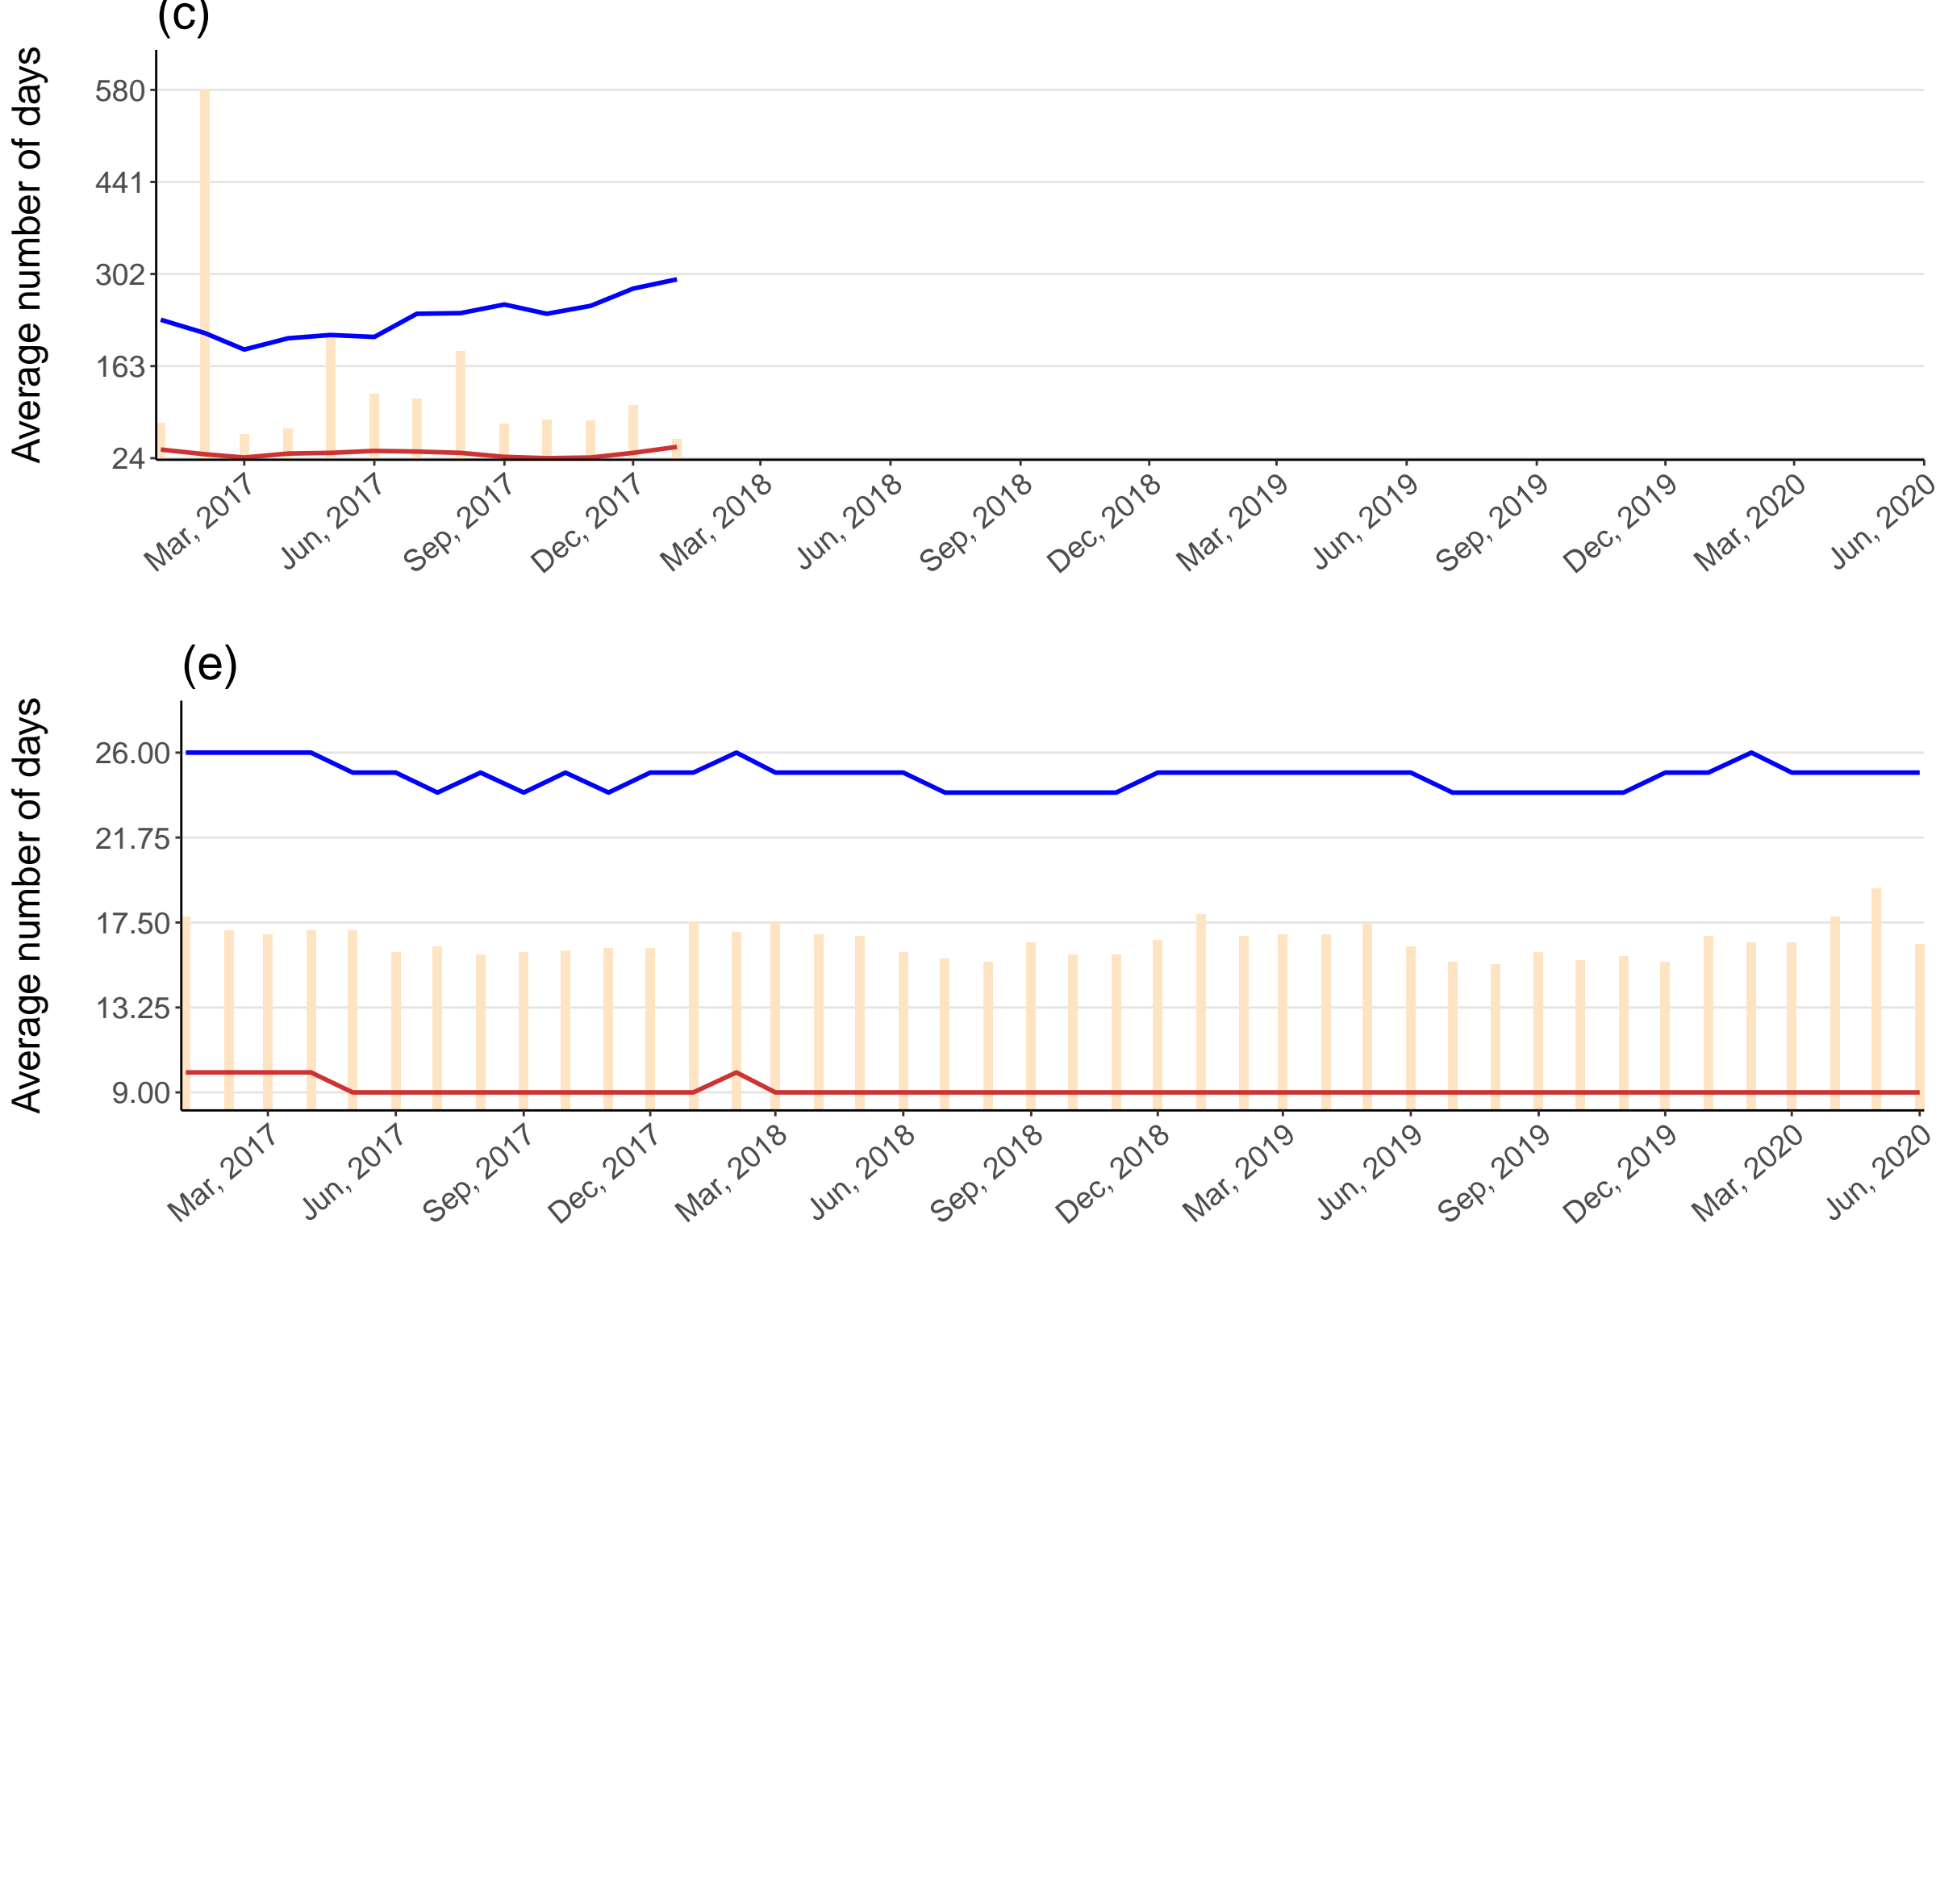

# Fukushima

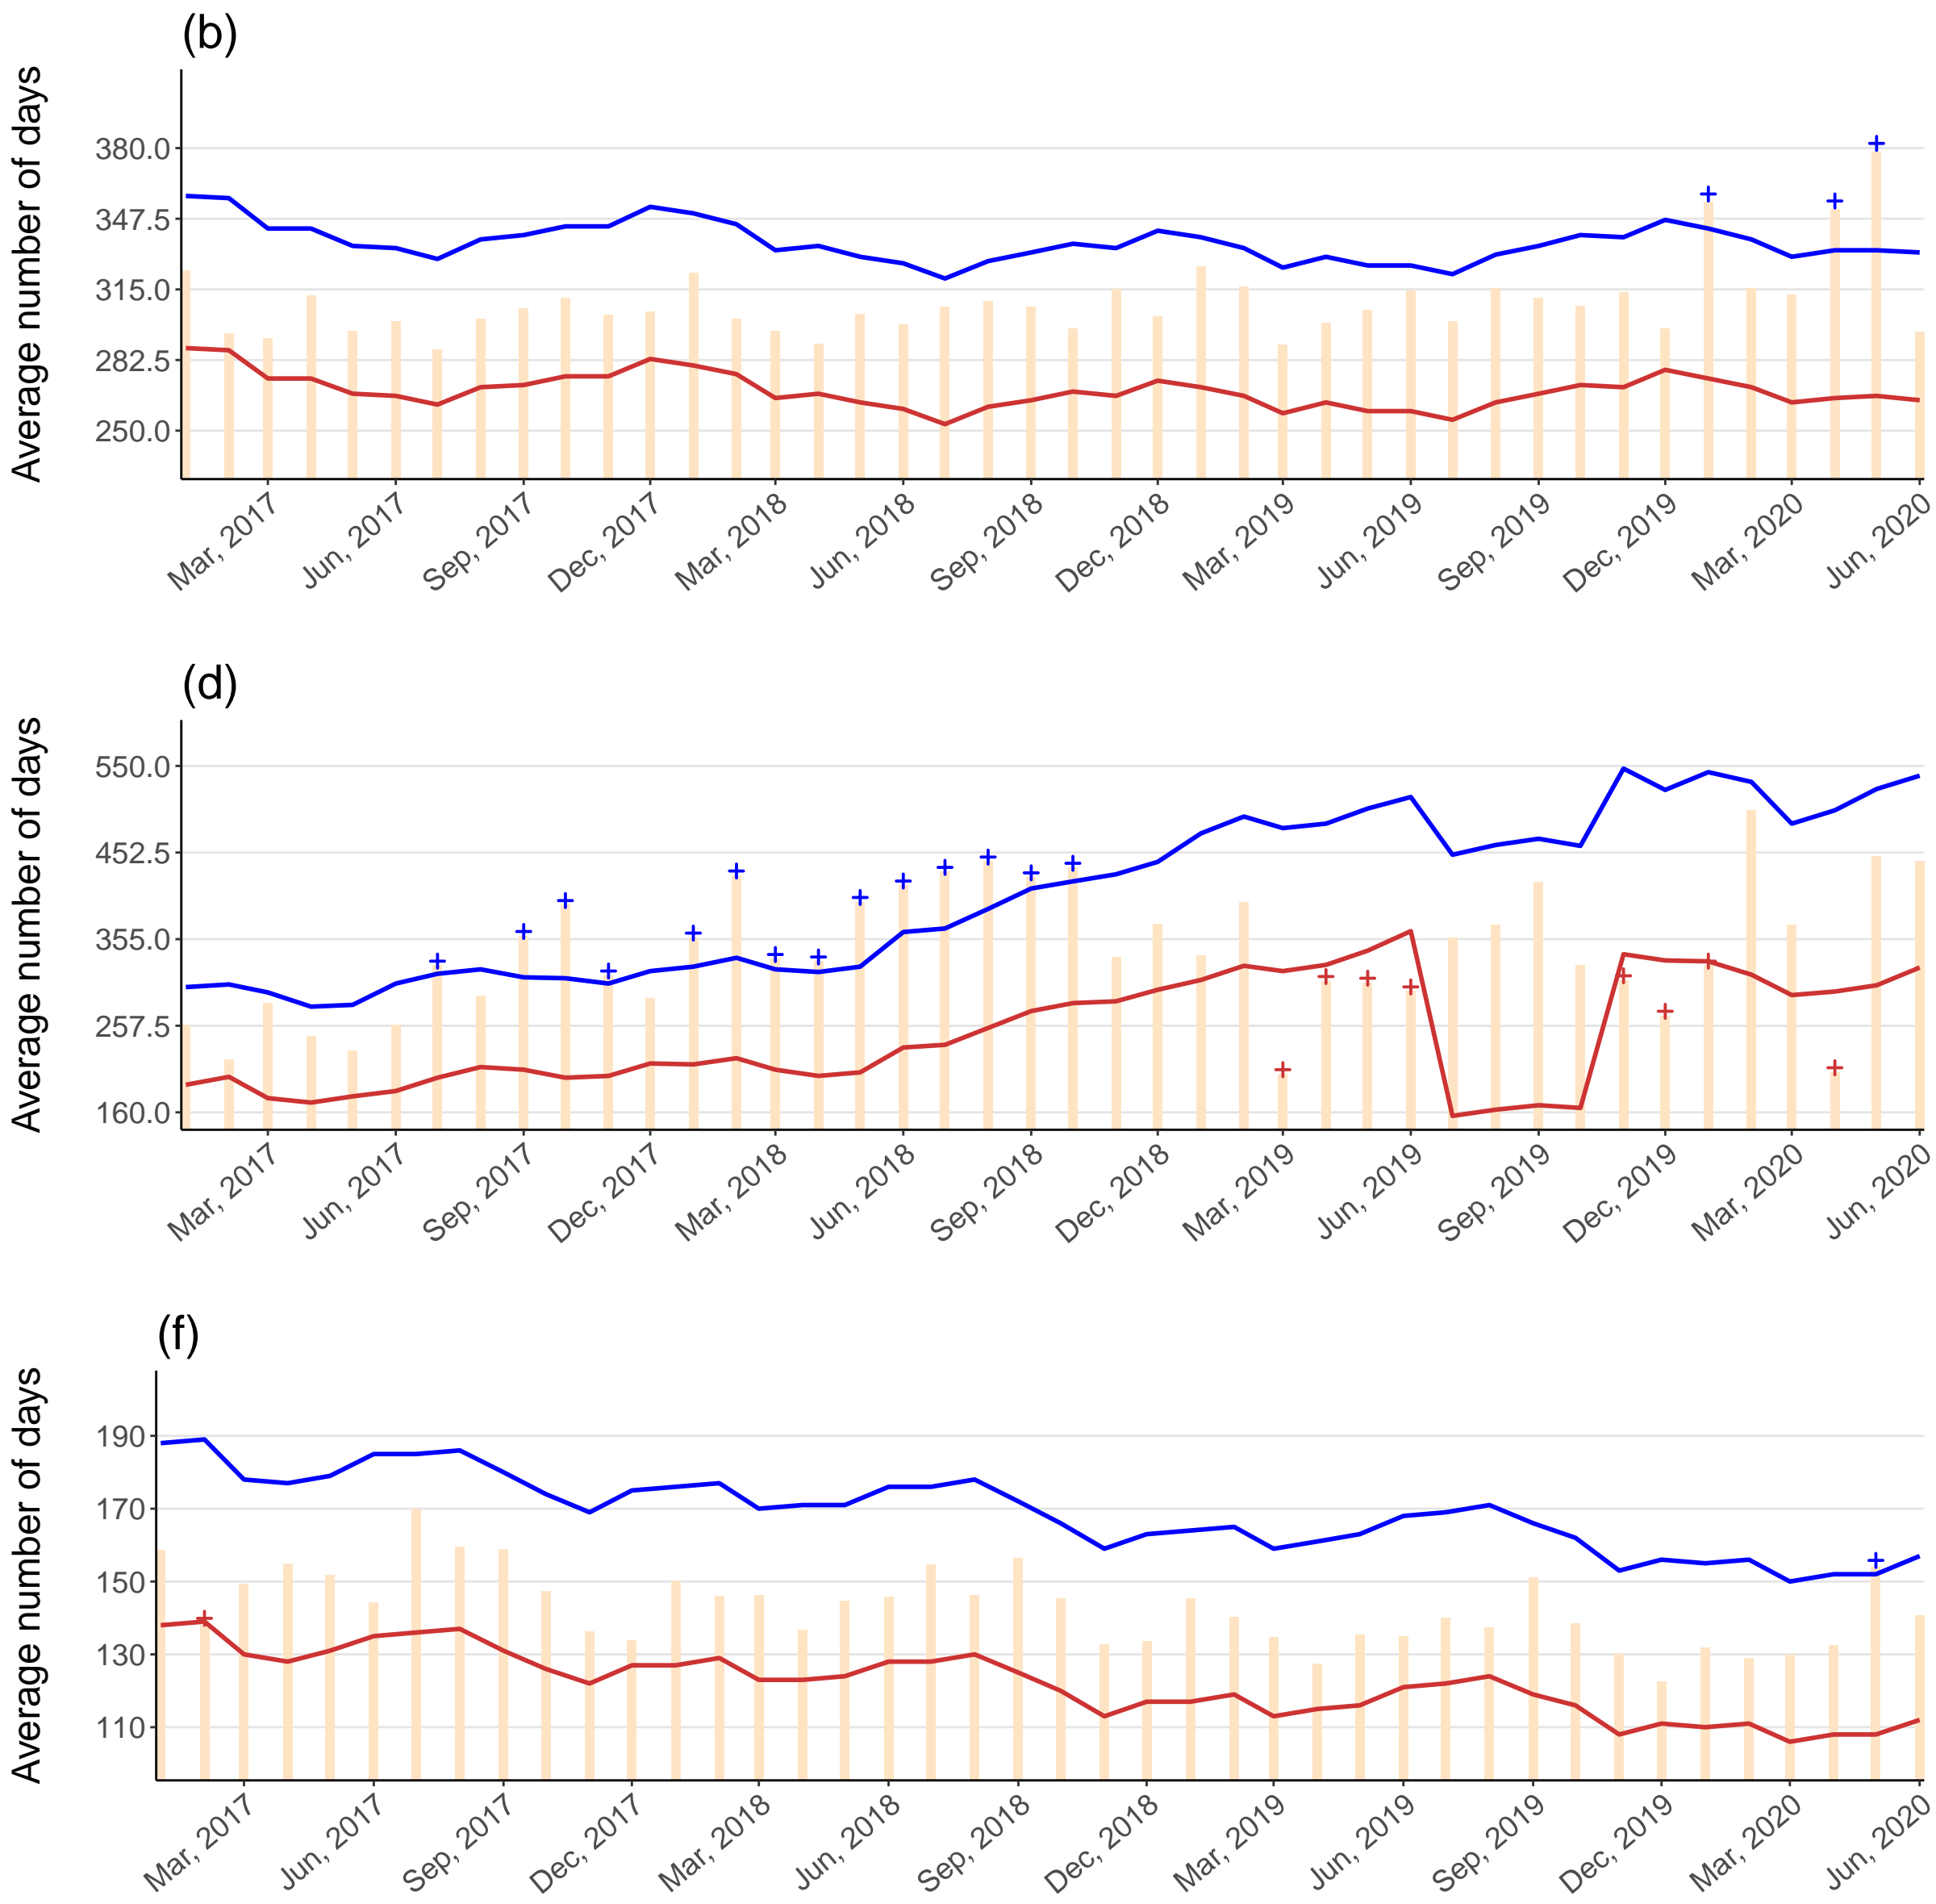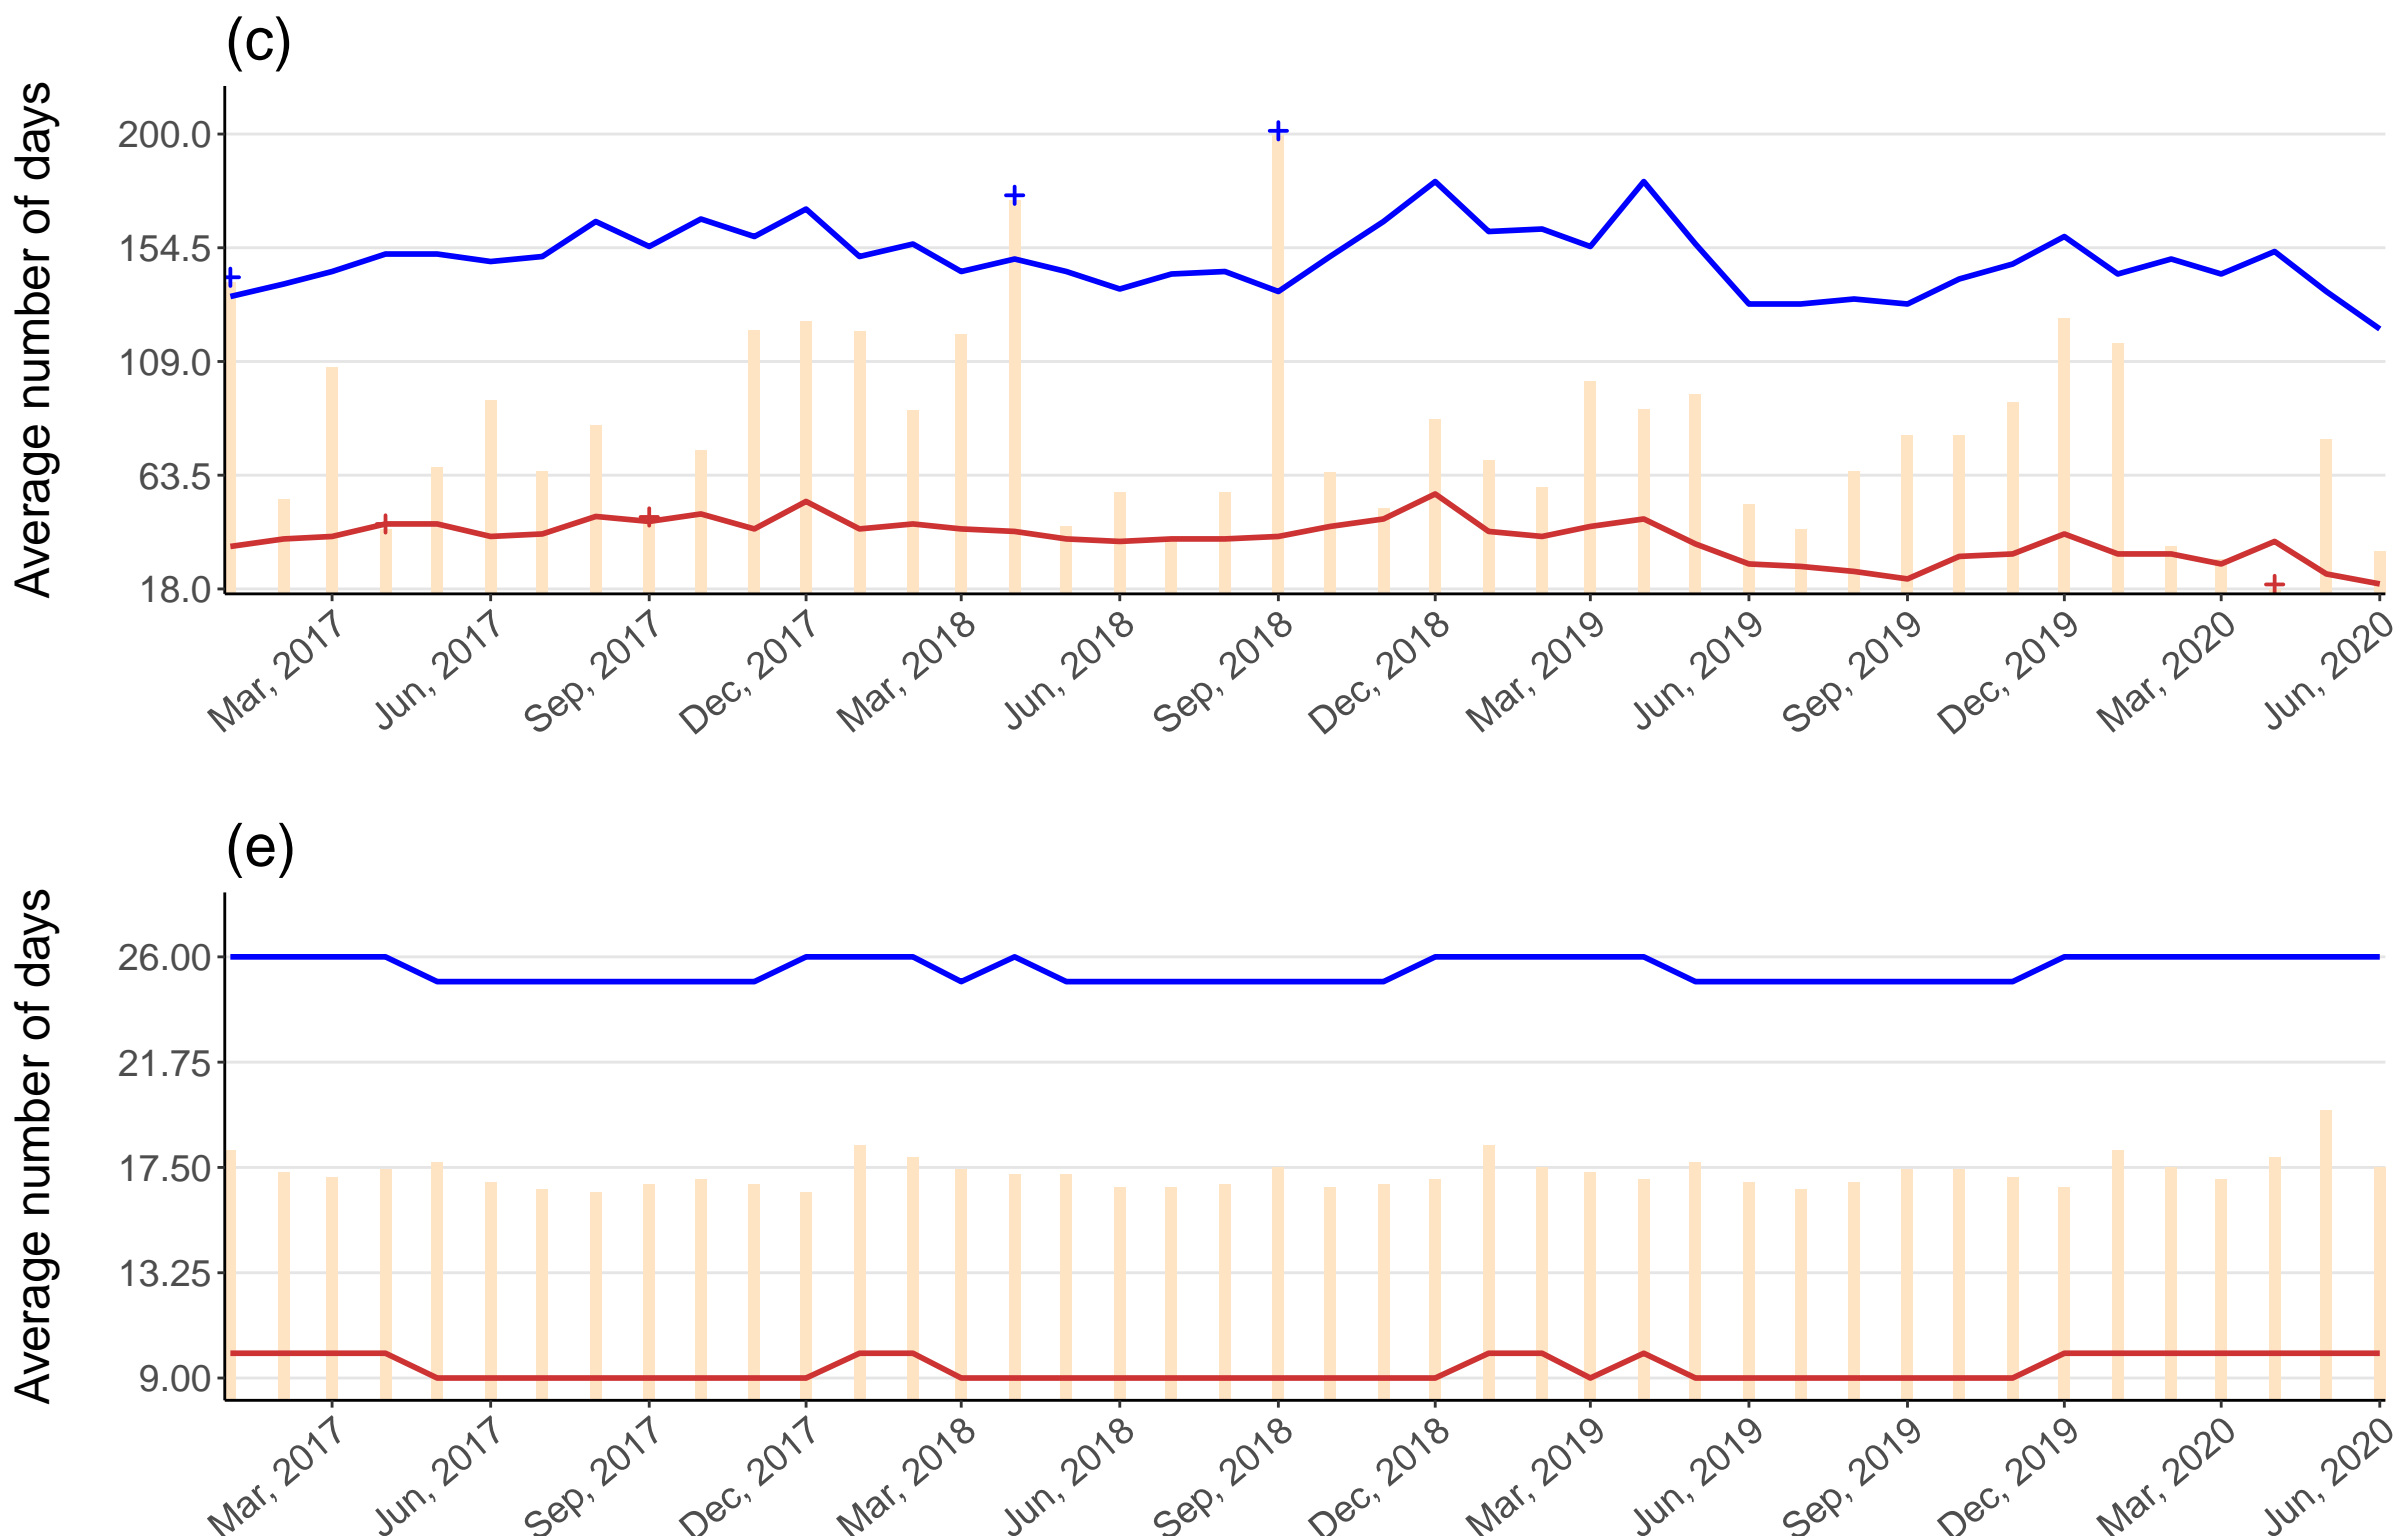

# Ibaraki

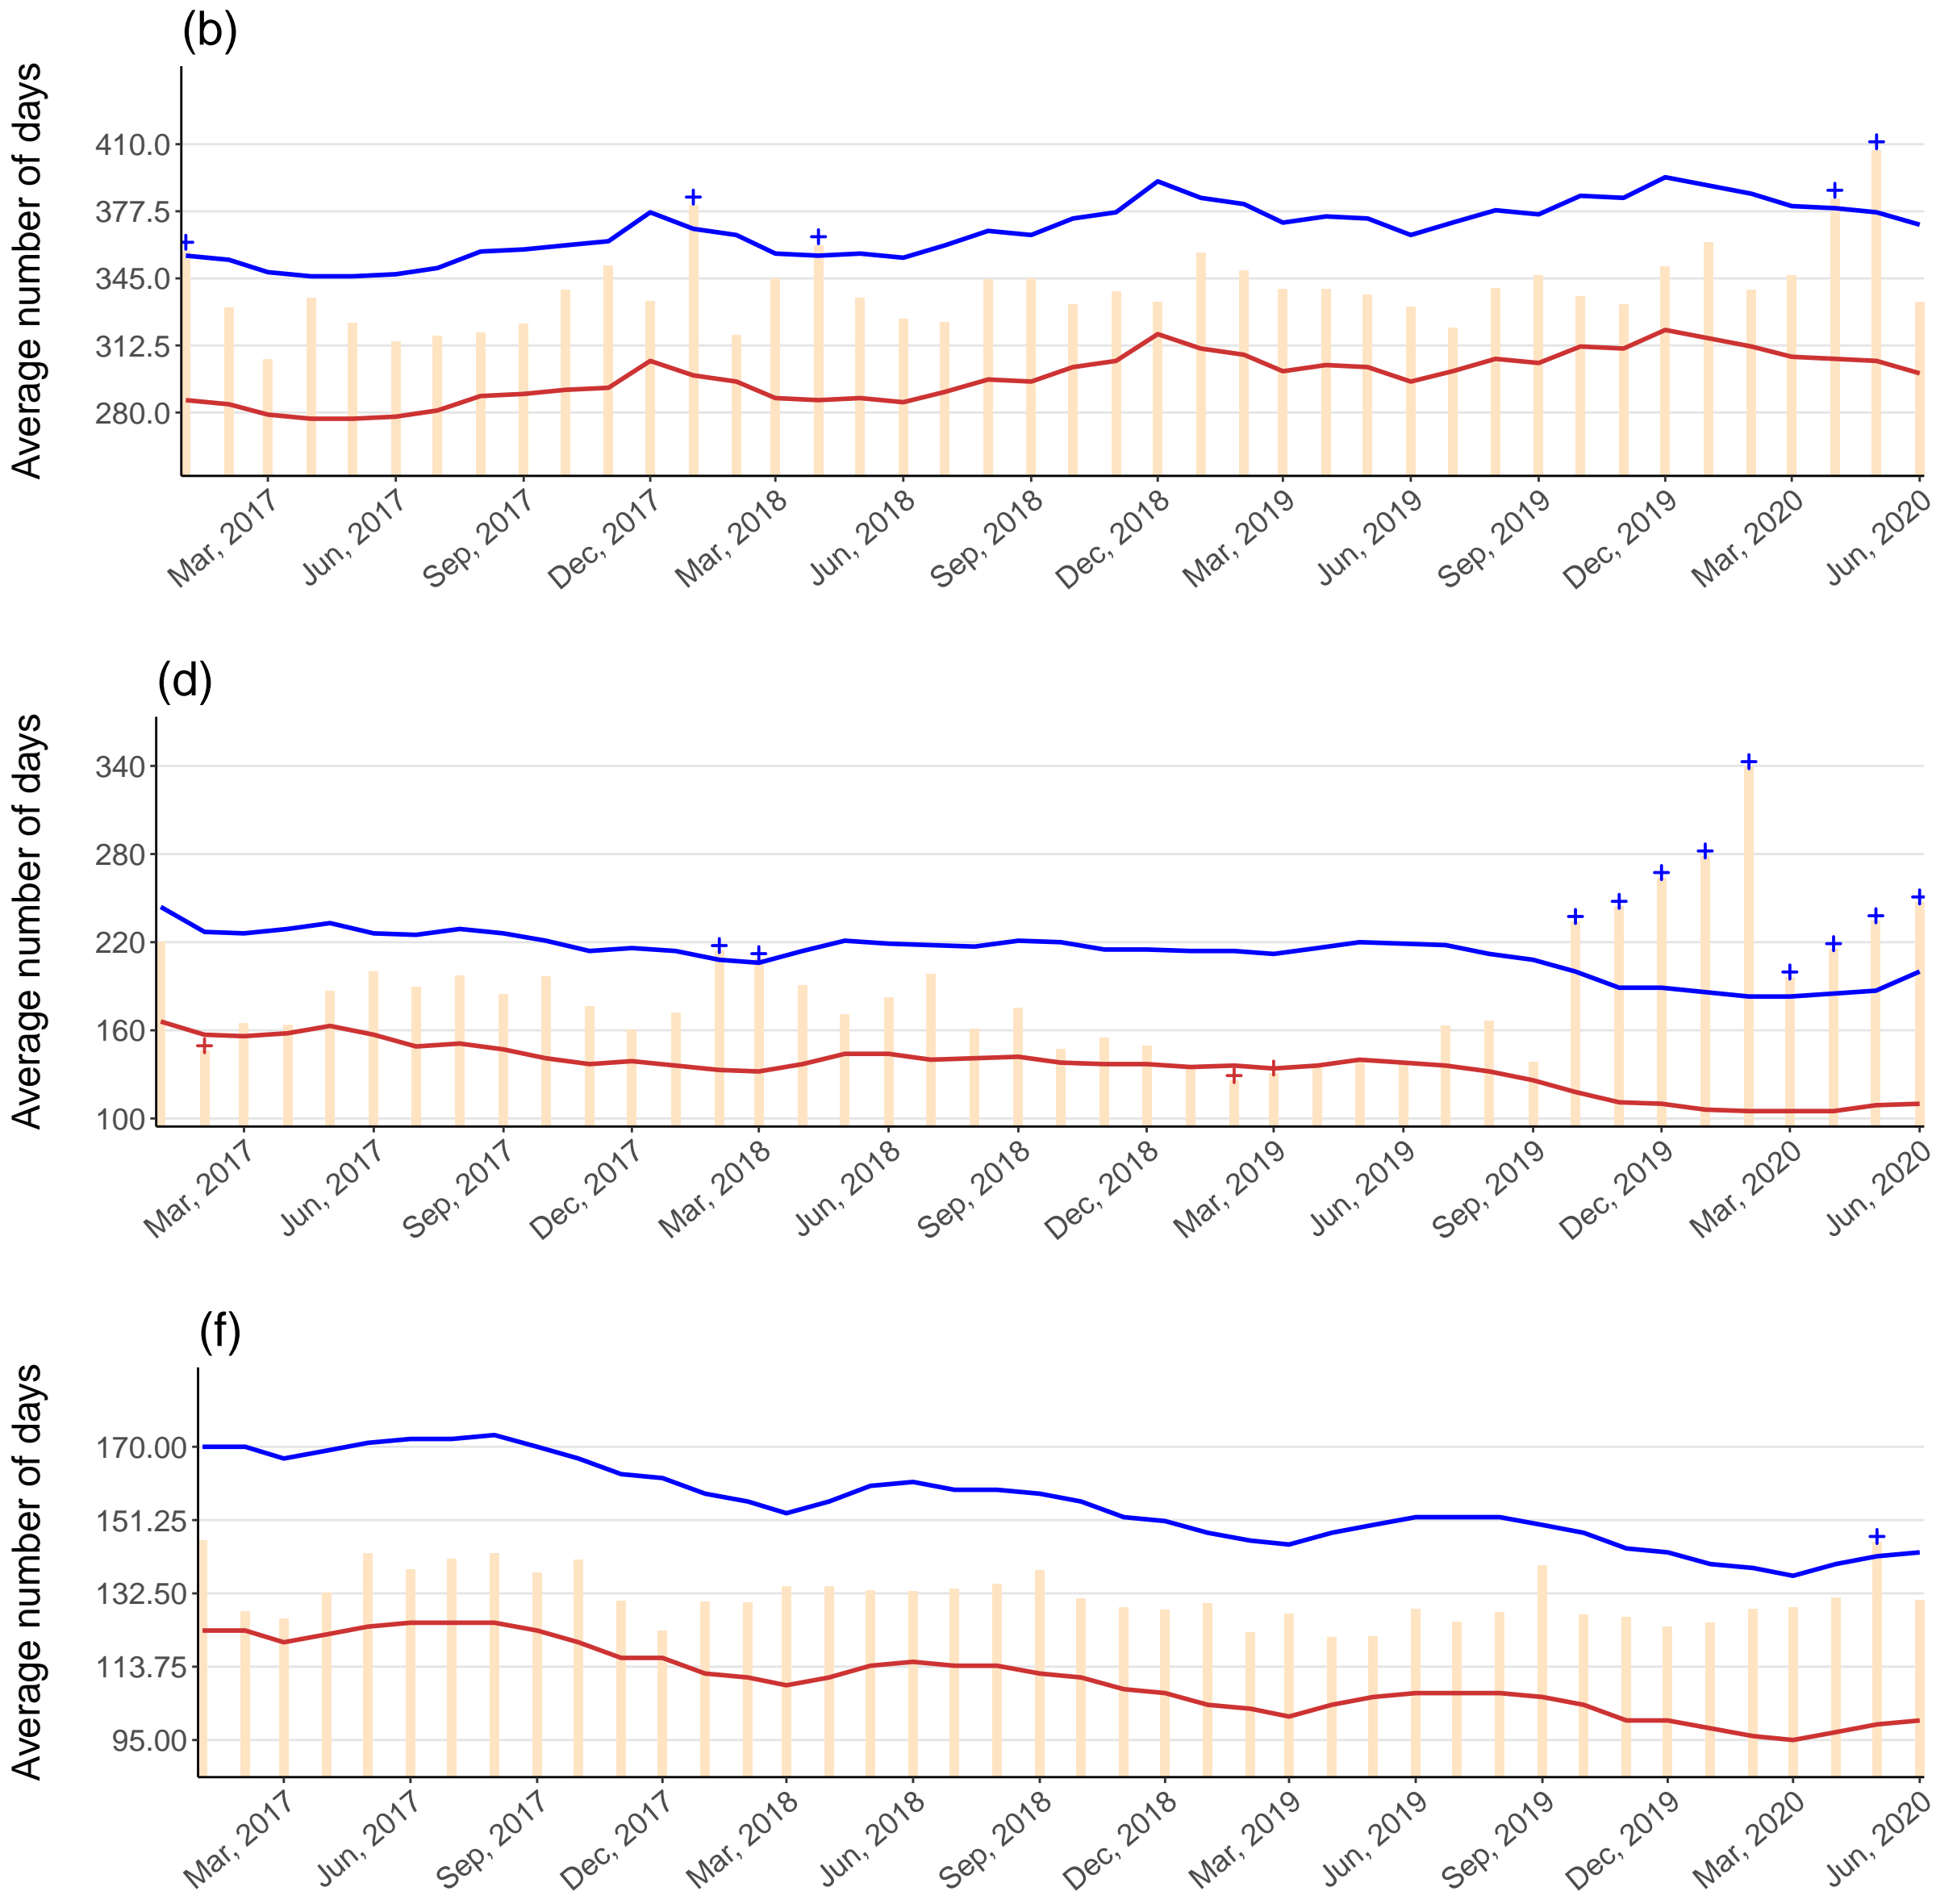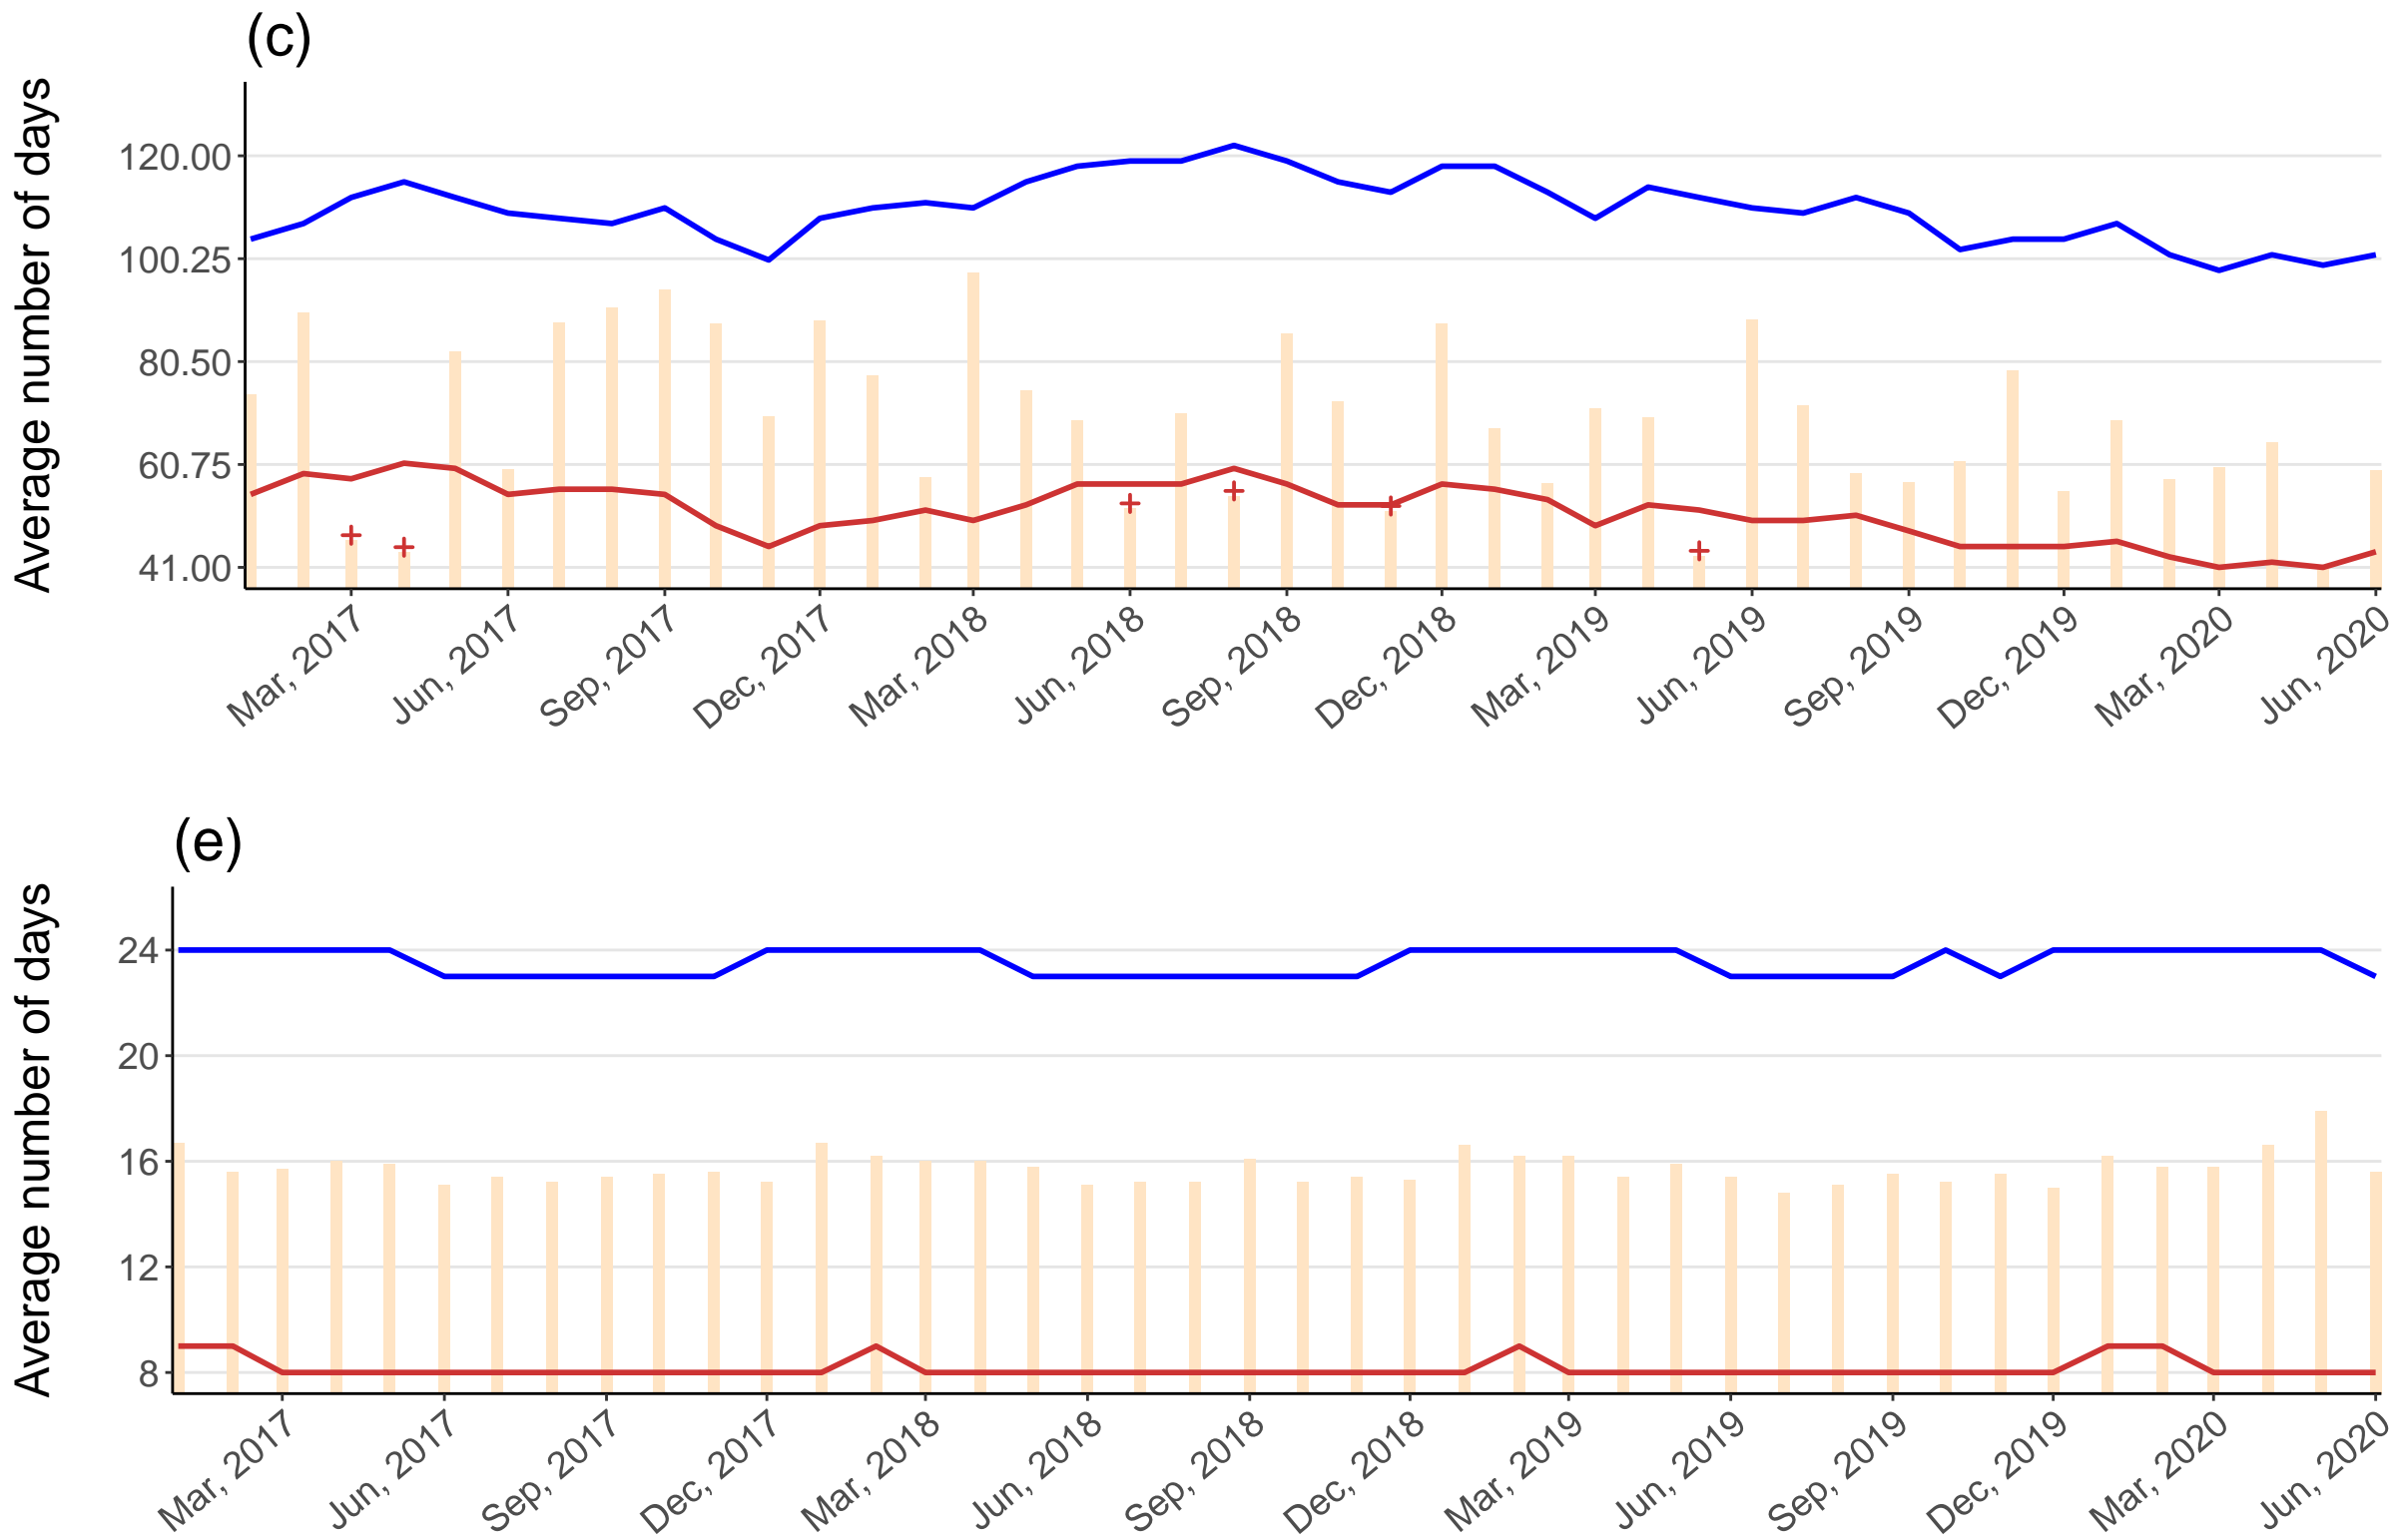

# Tochigi

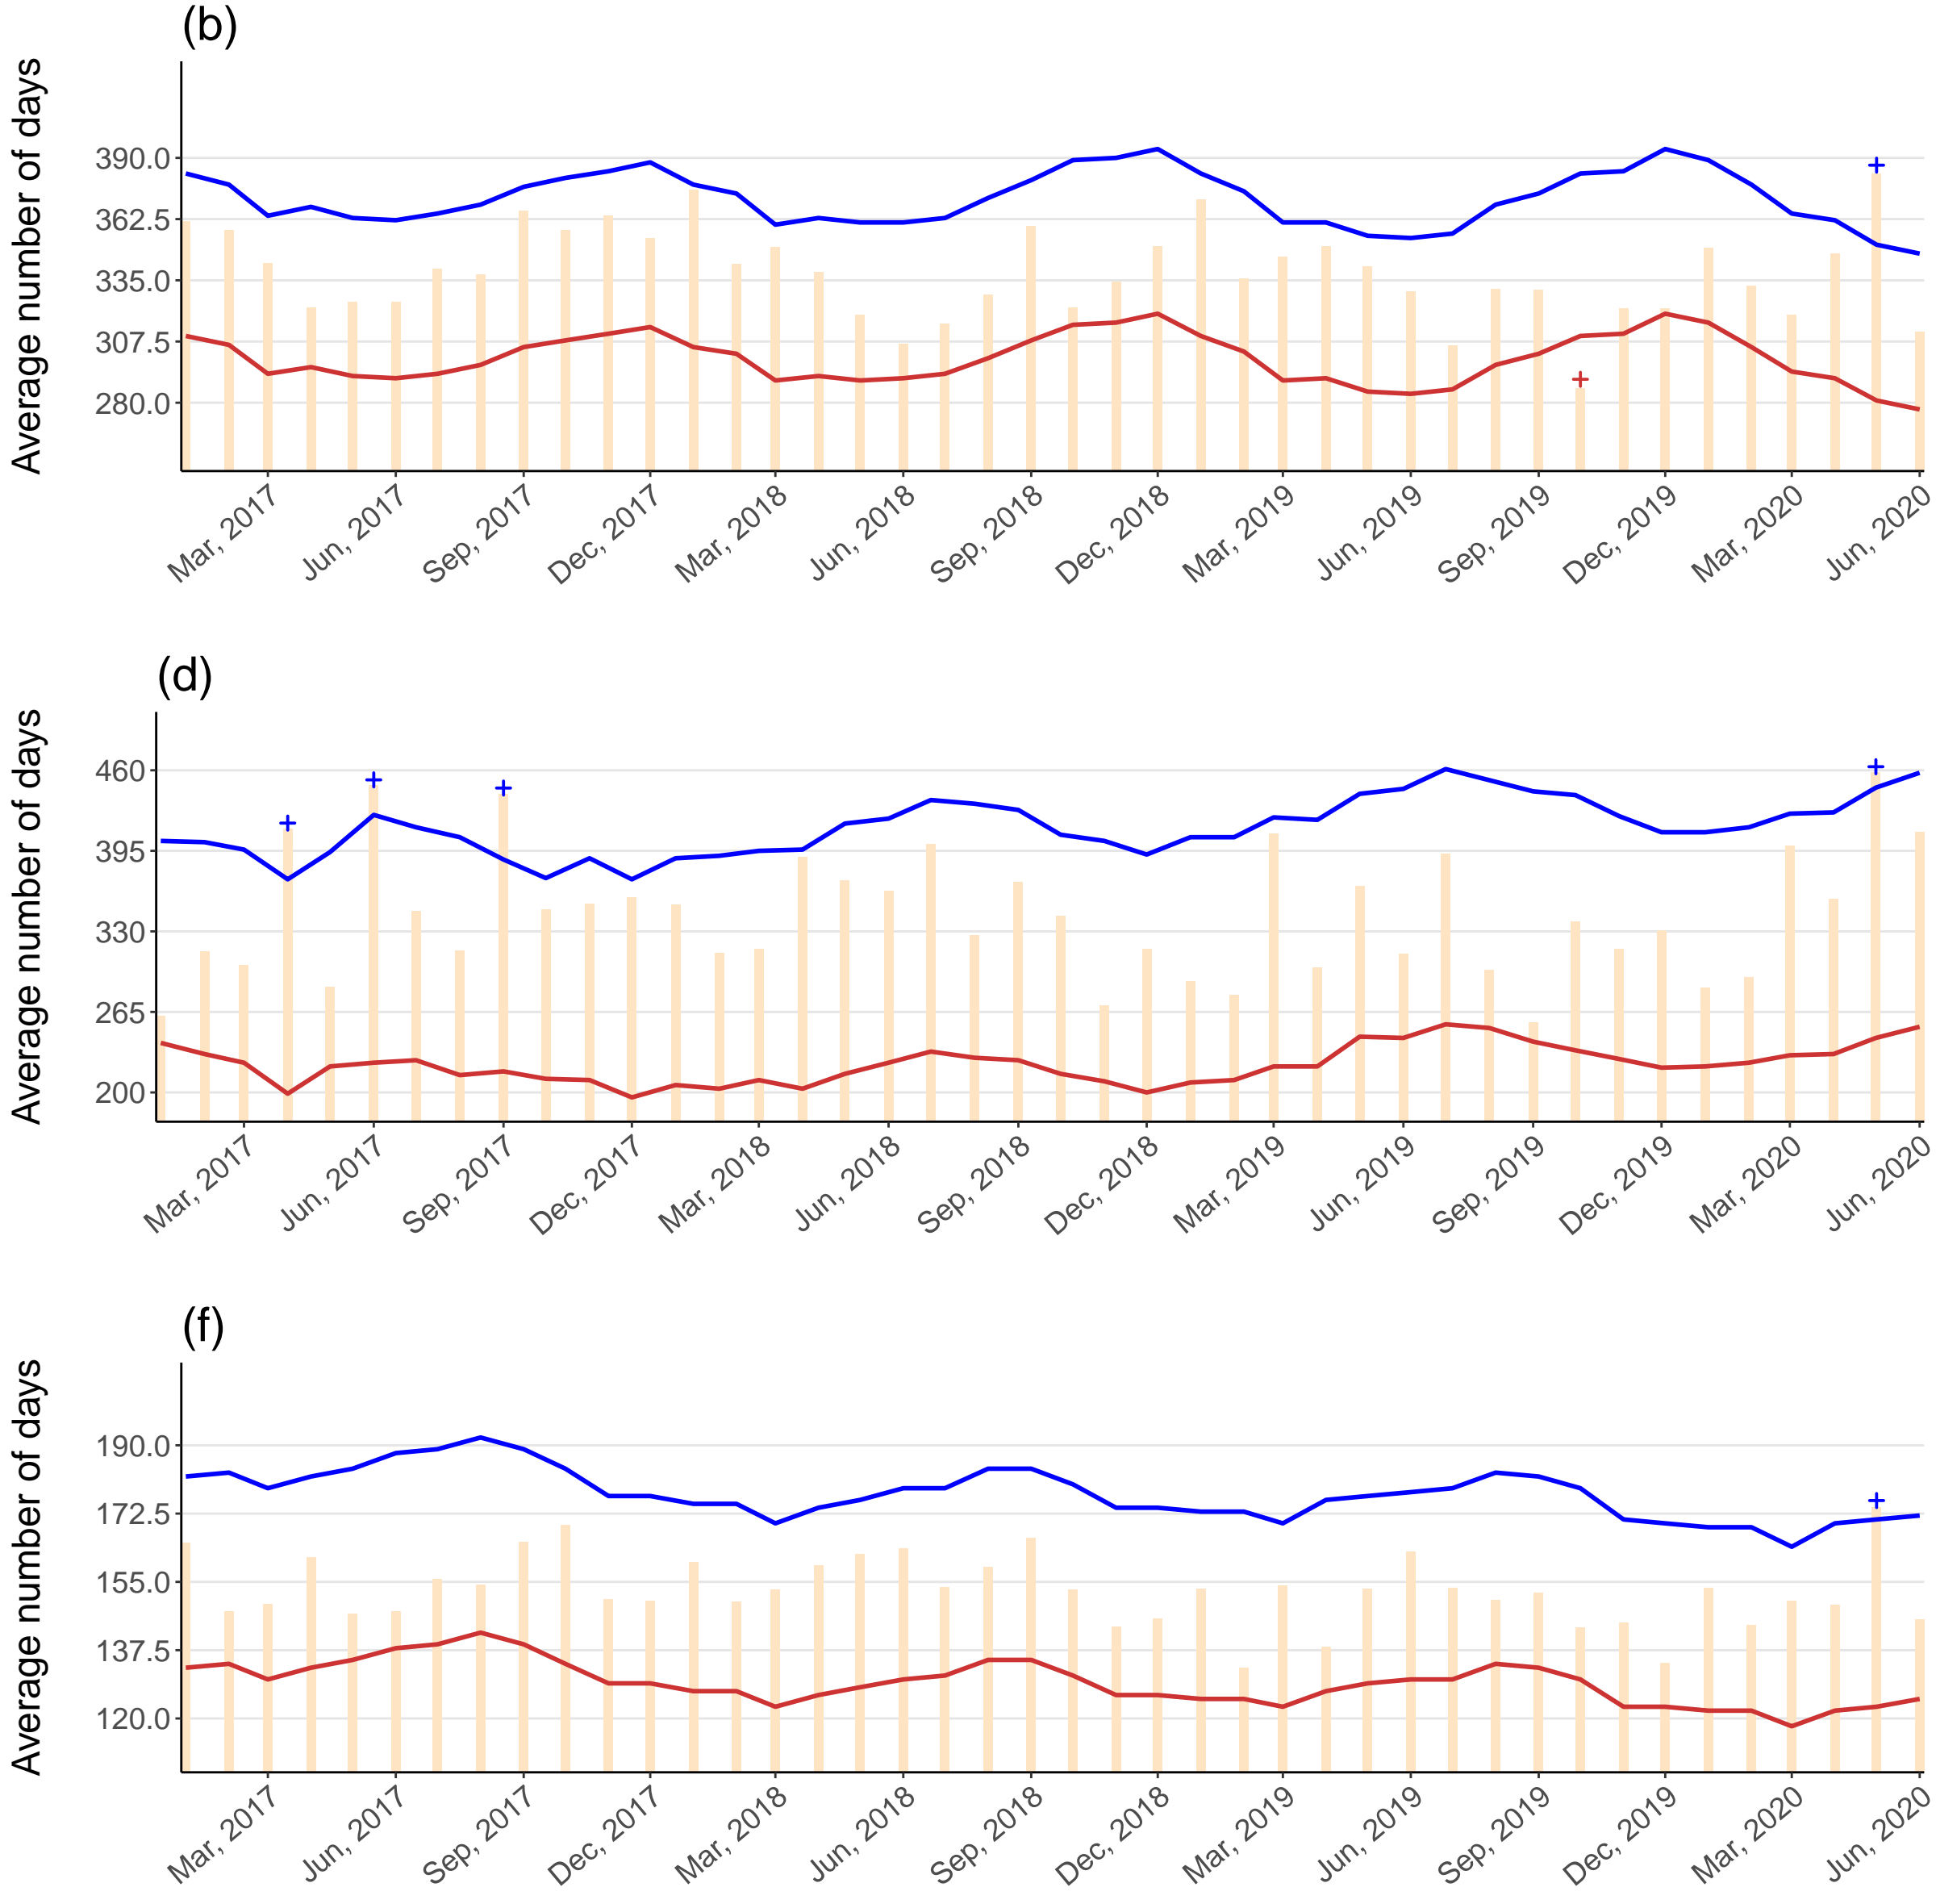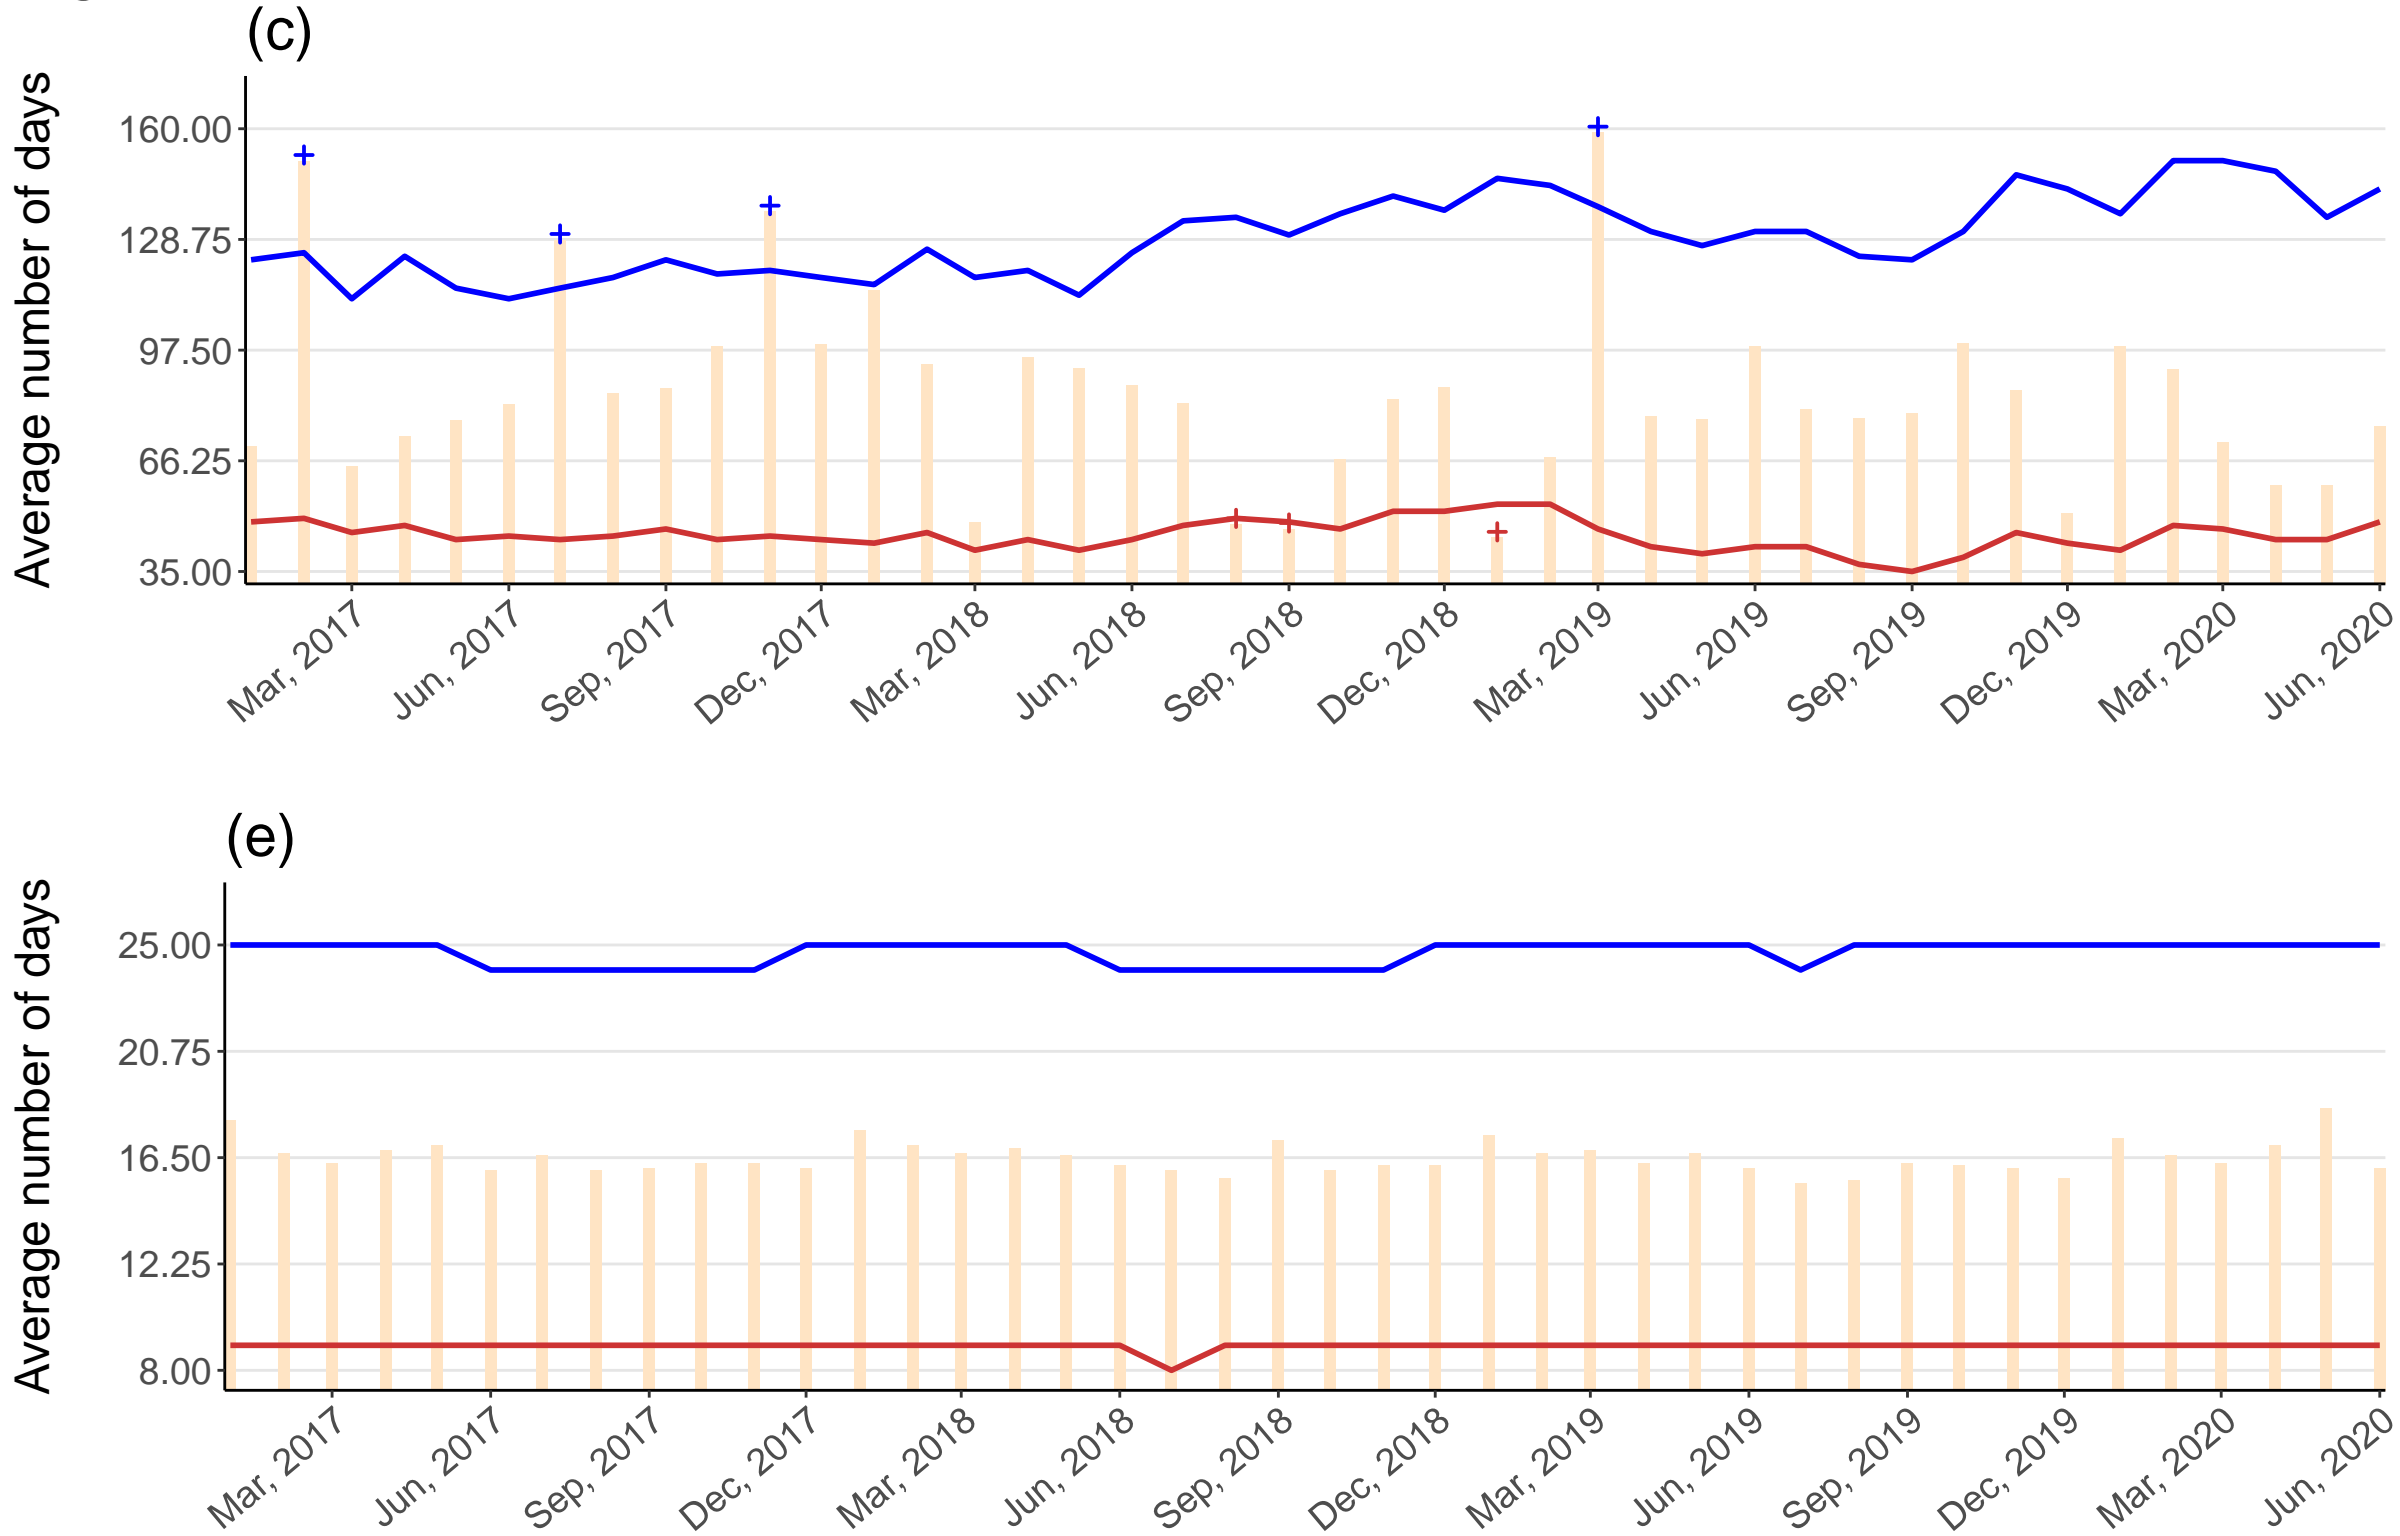



Gunma

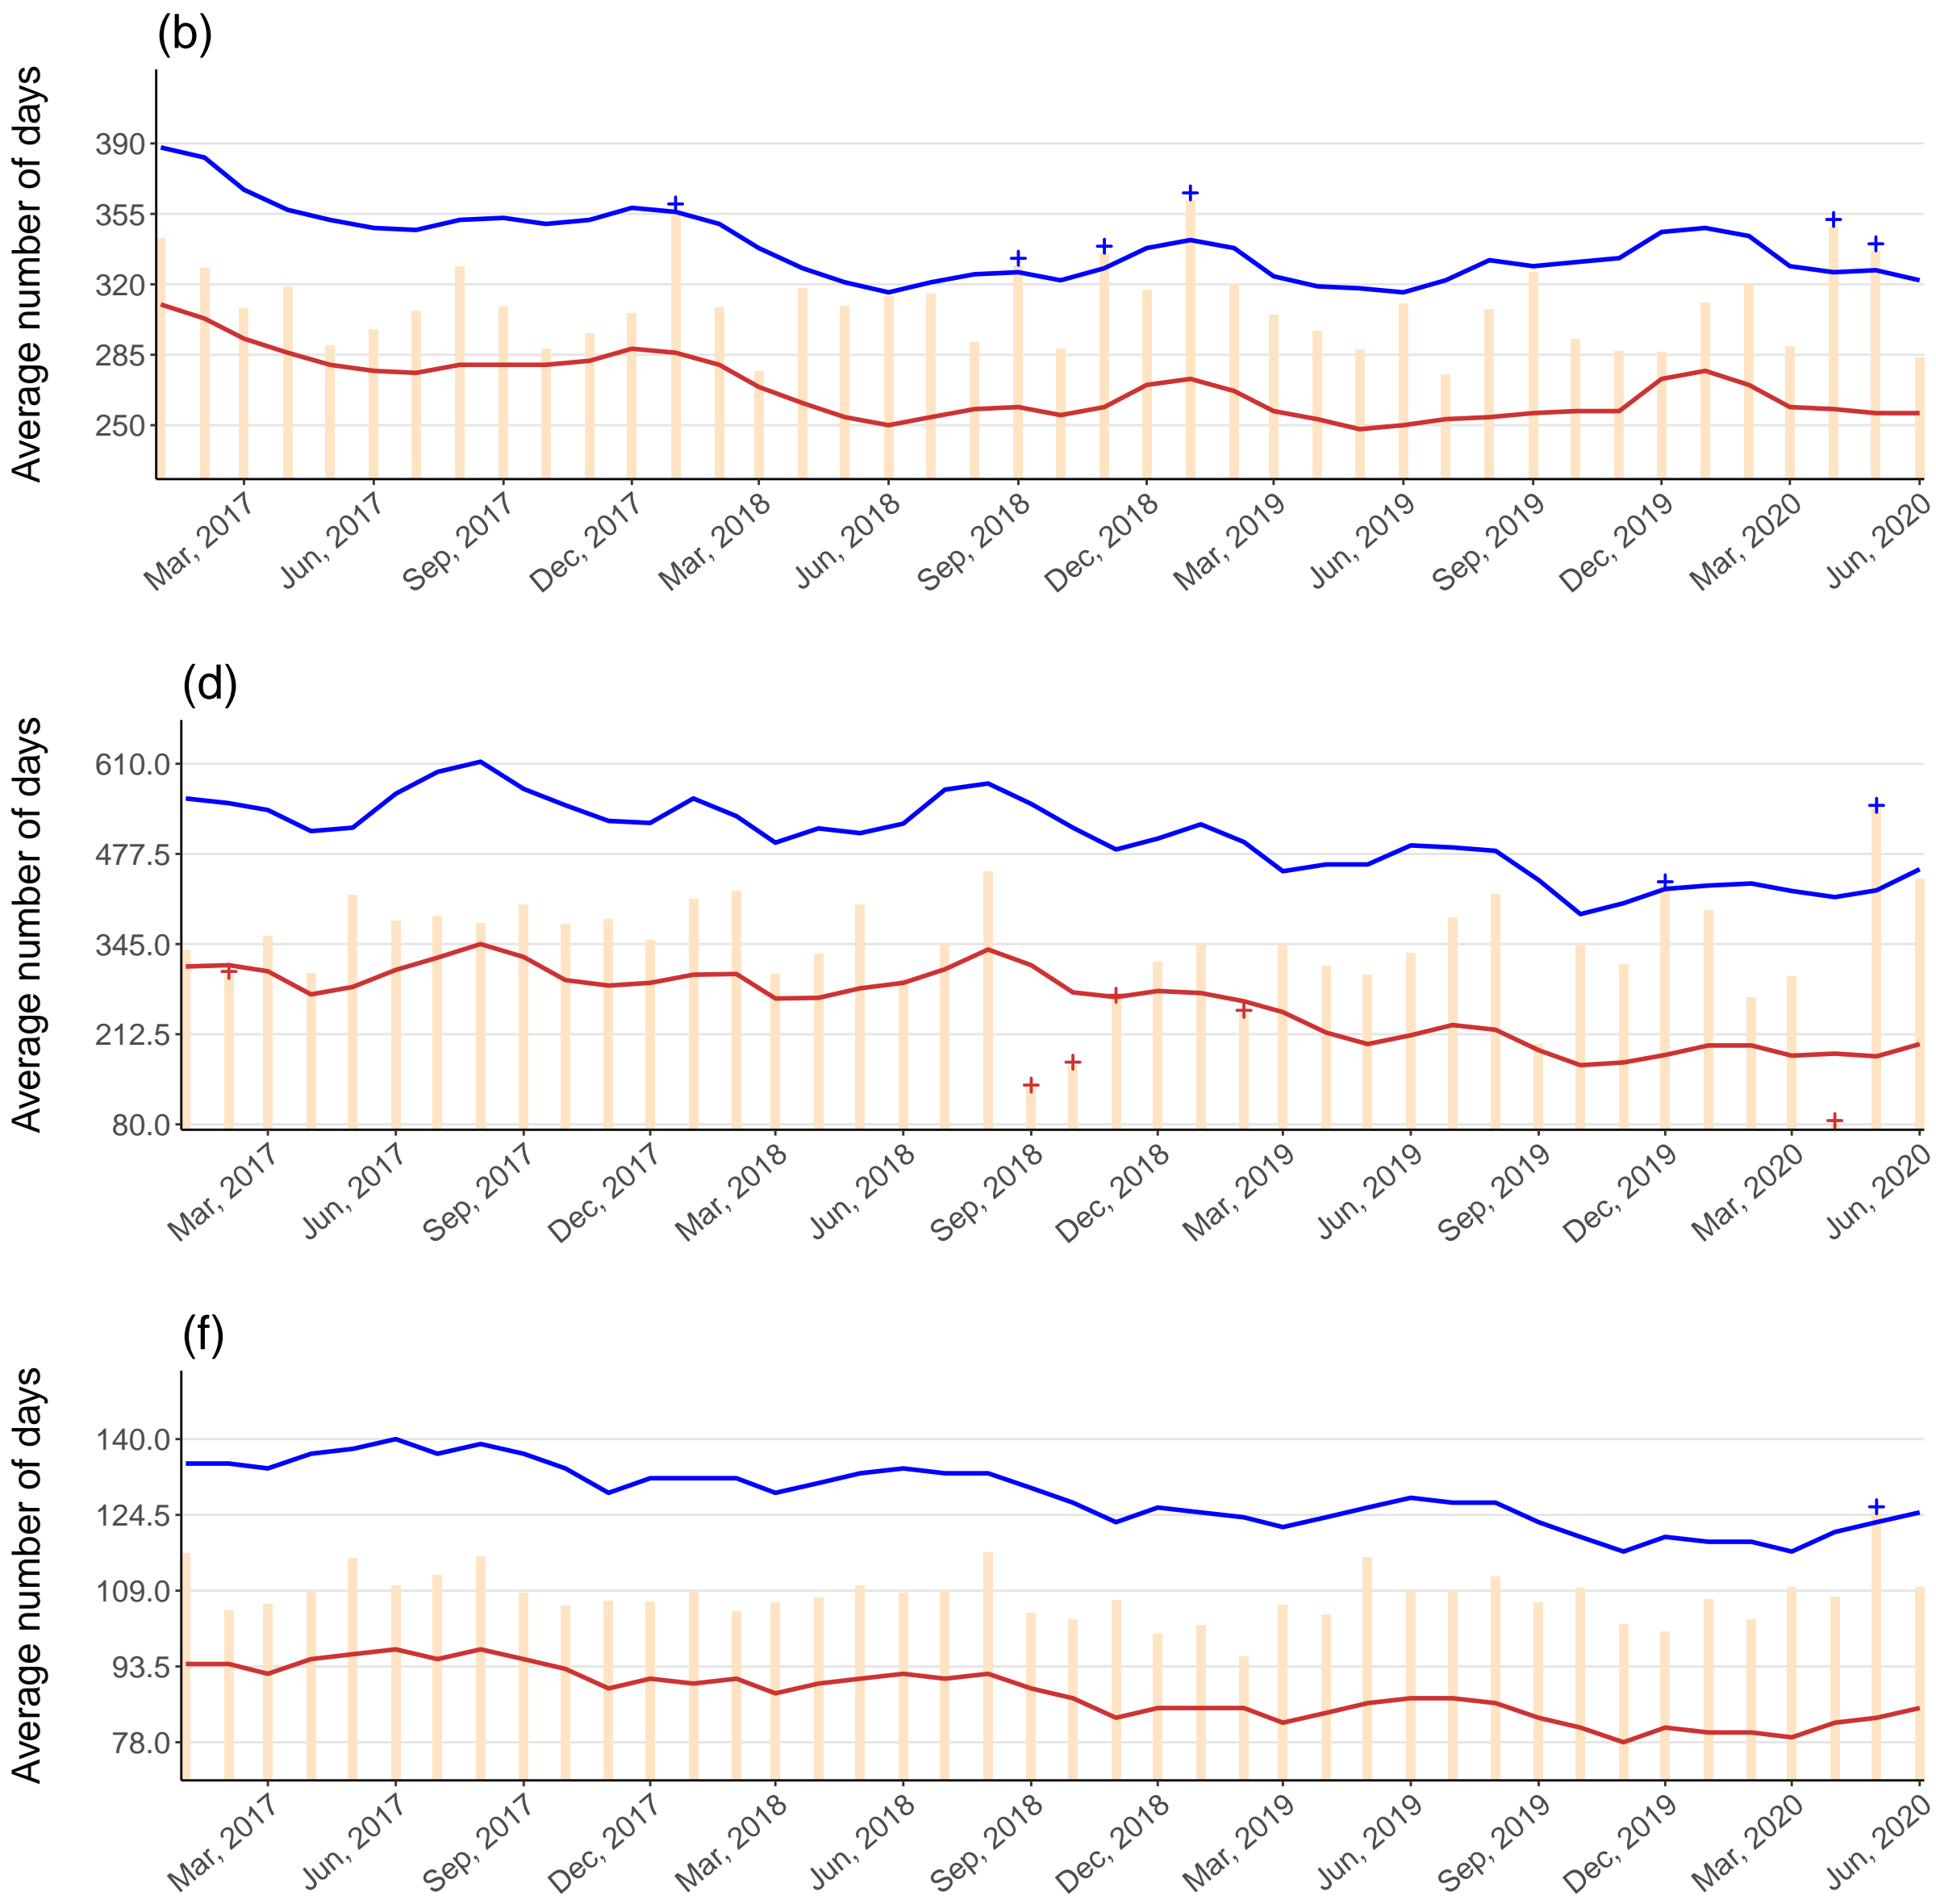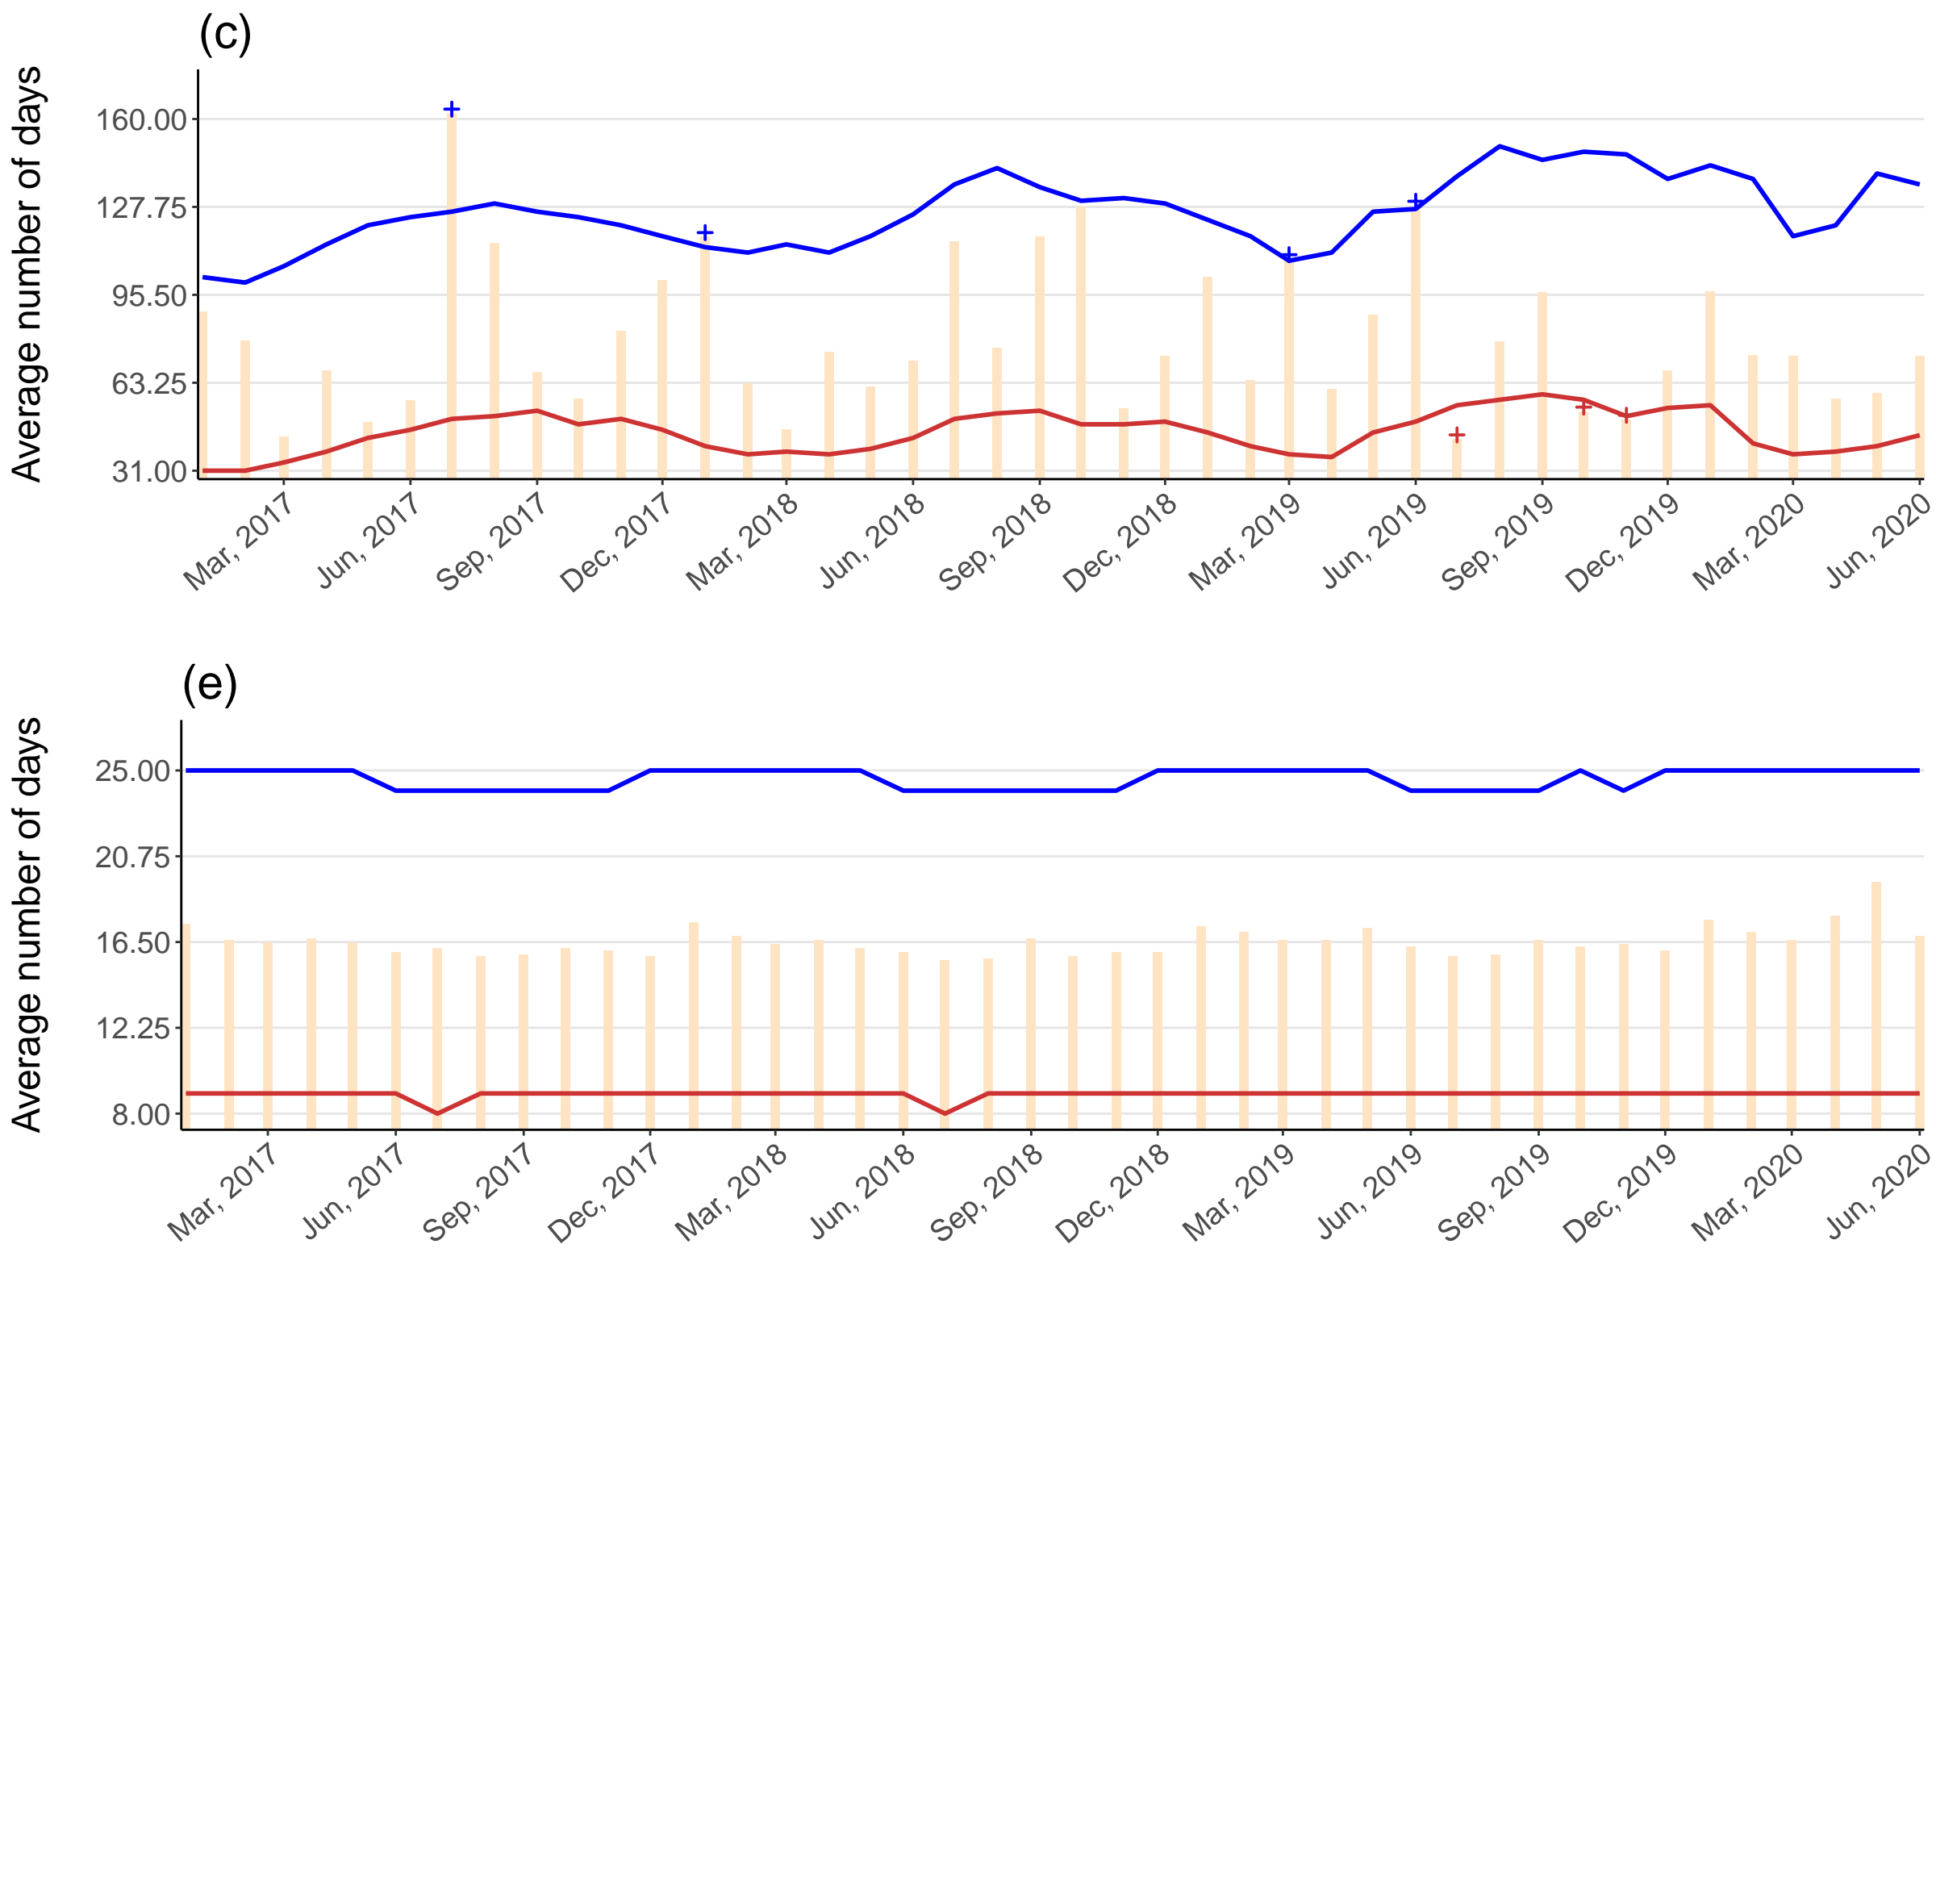

Saitama

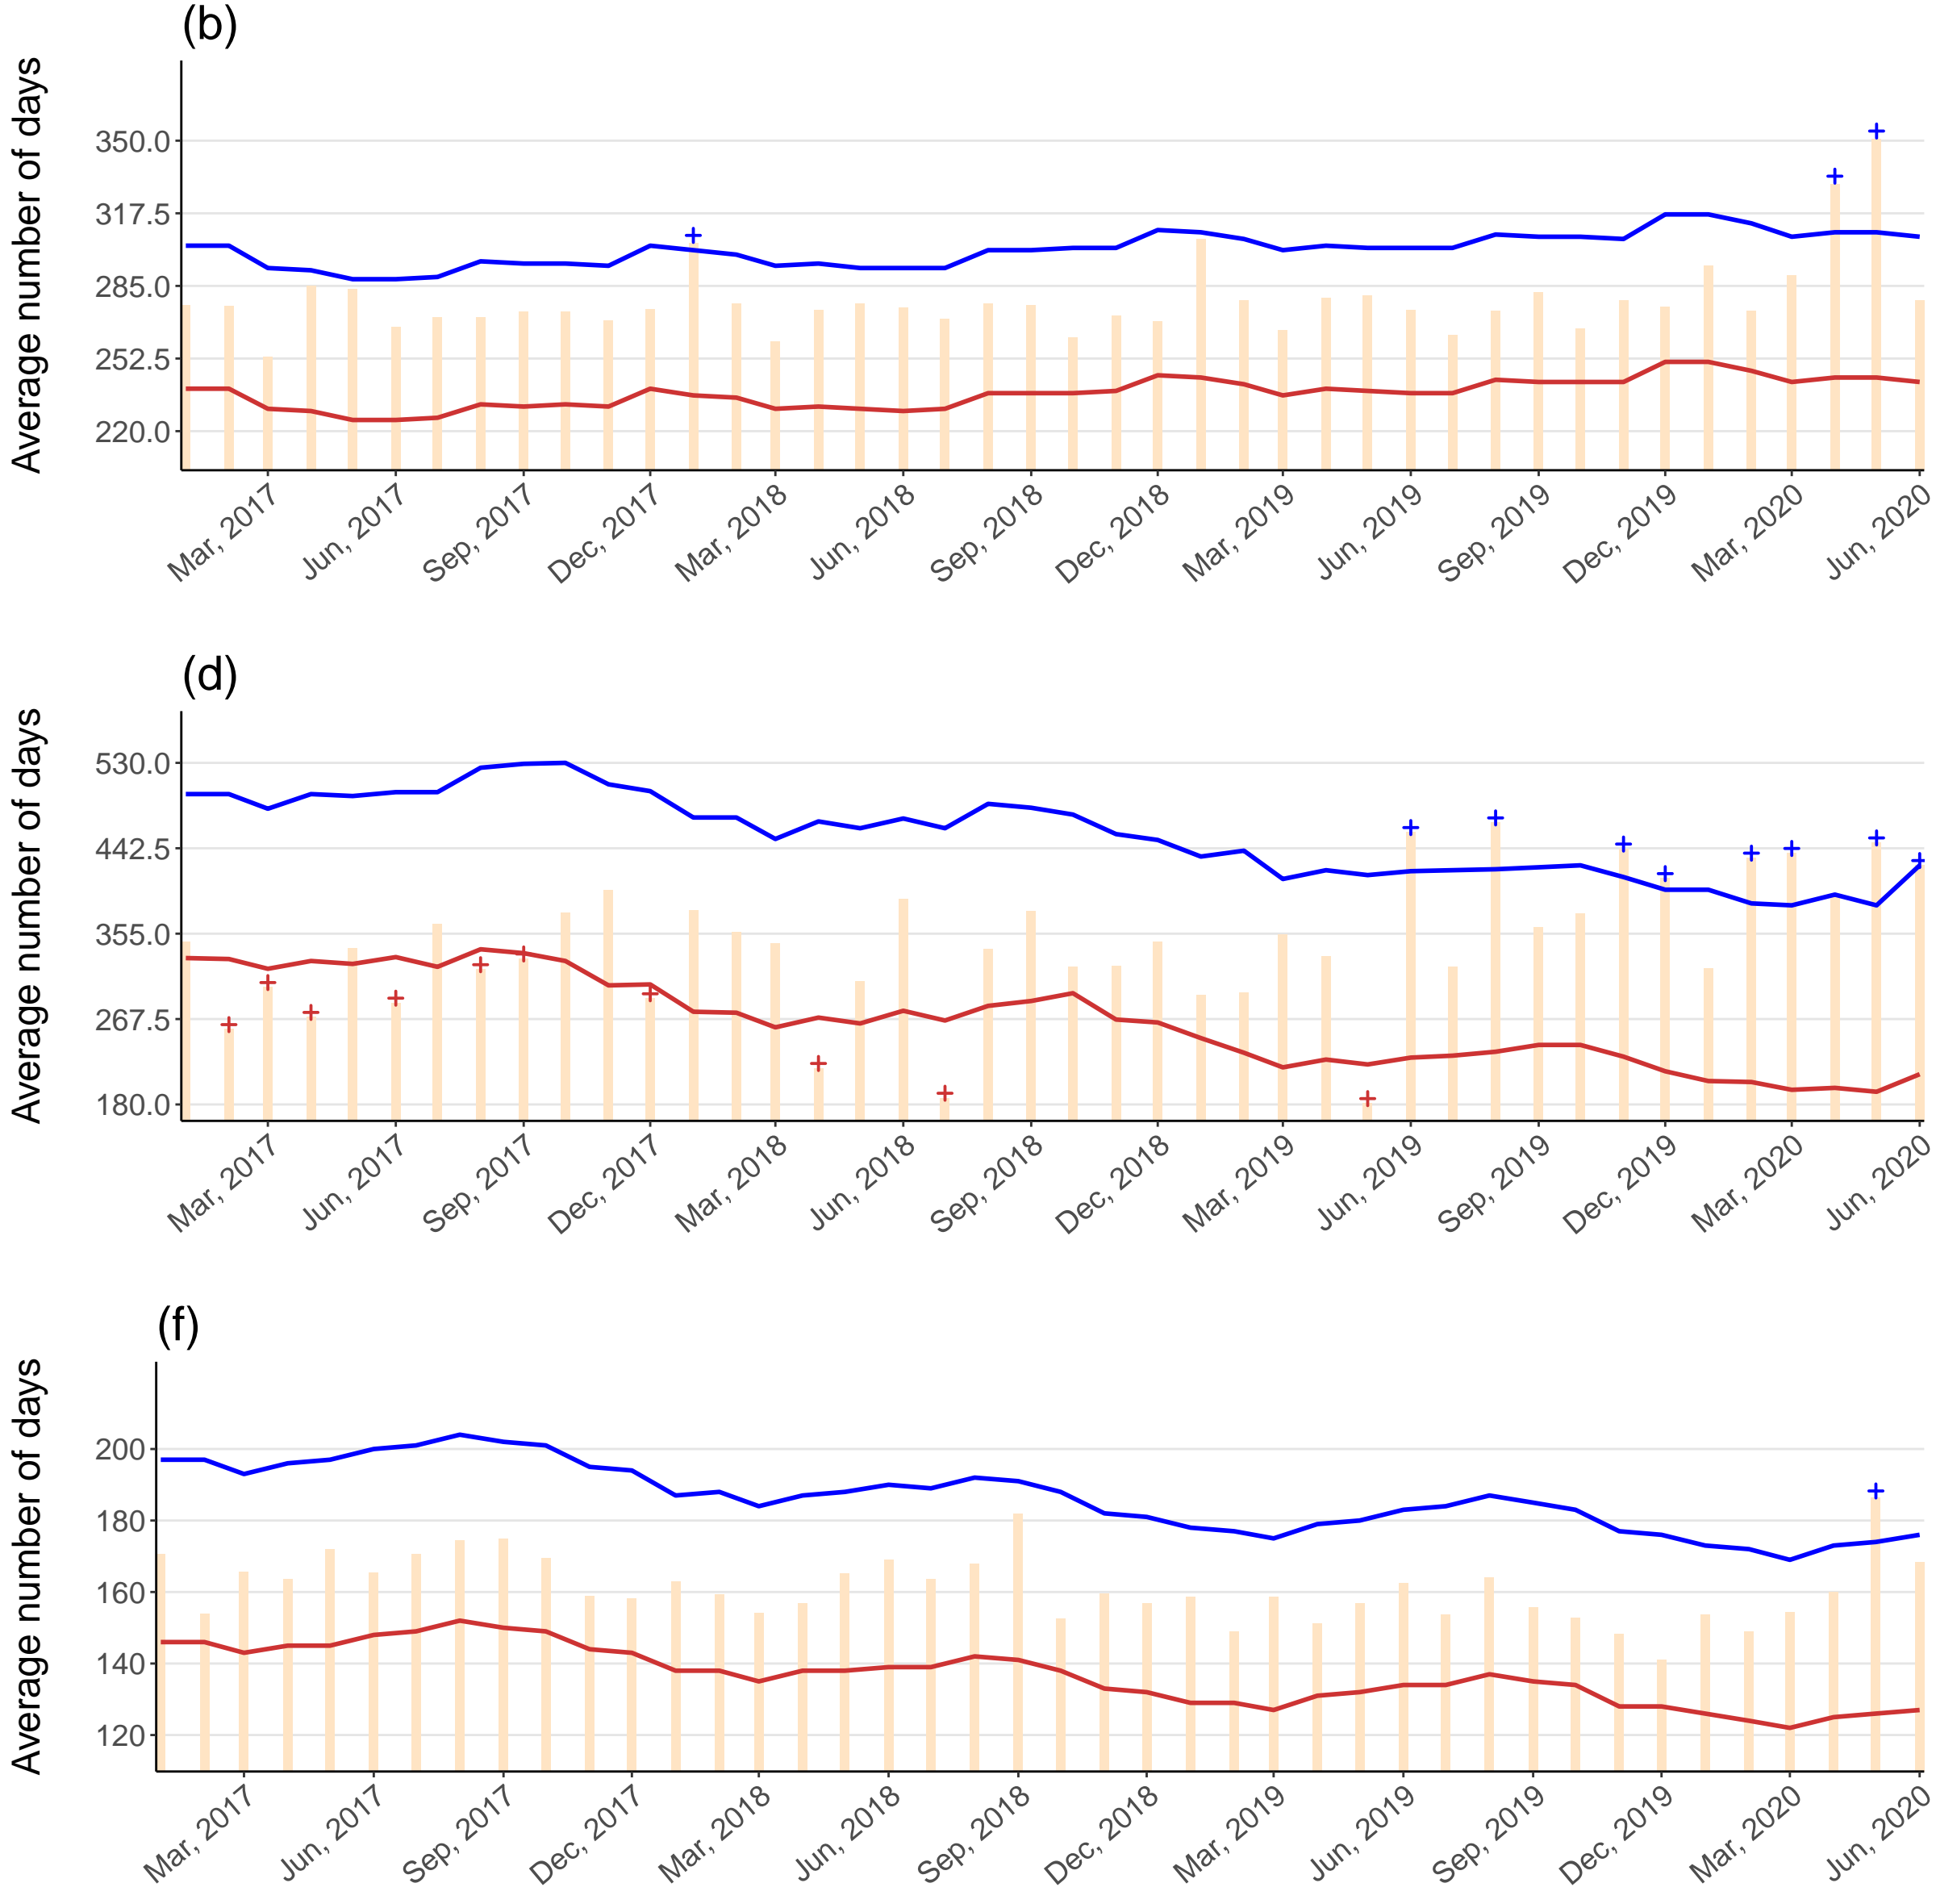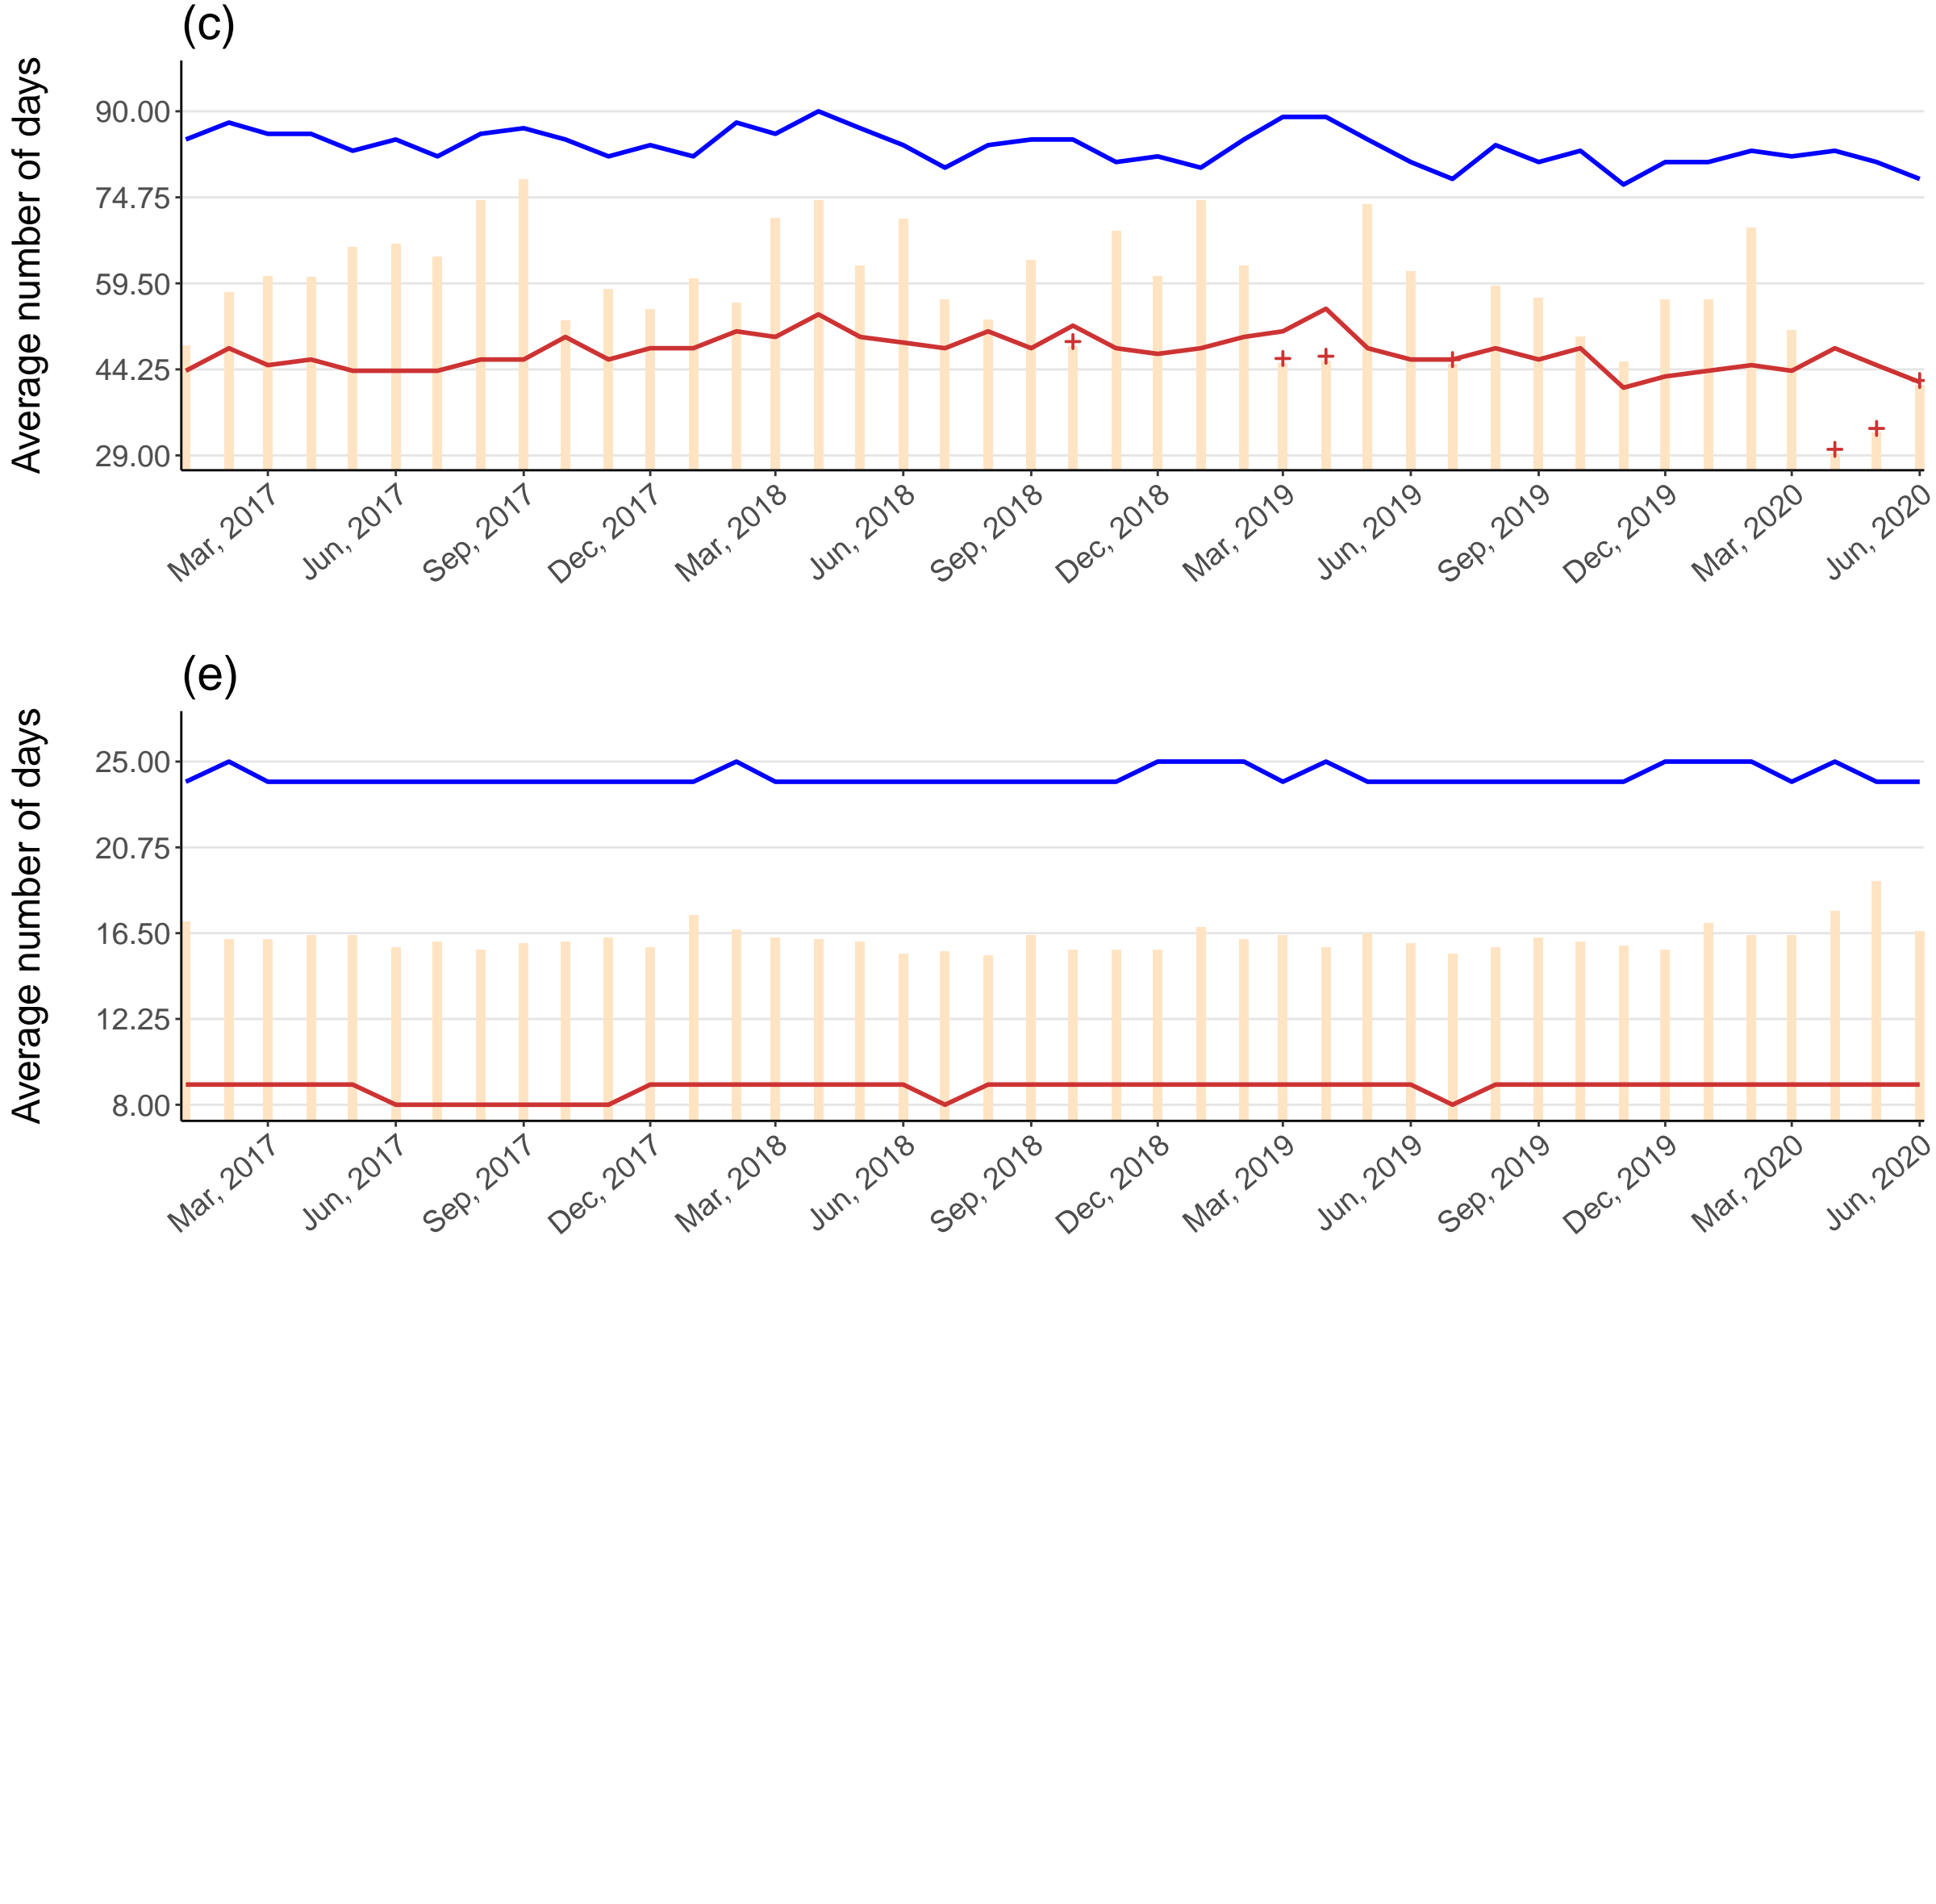

Chiba

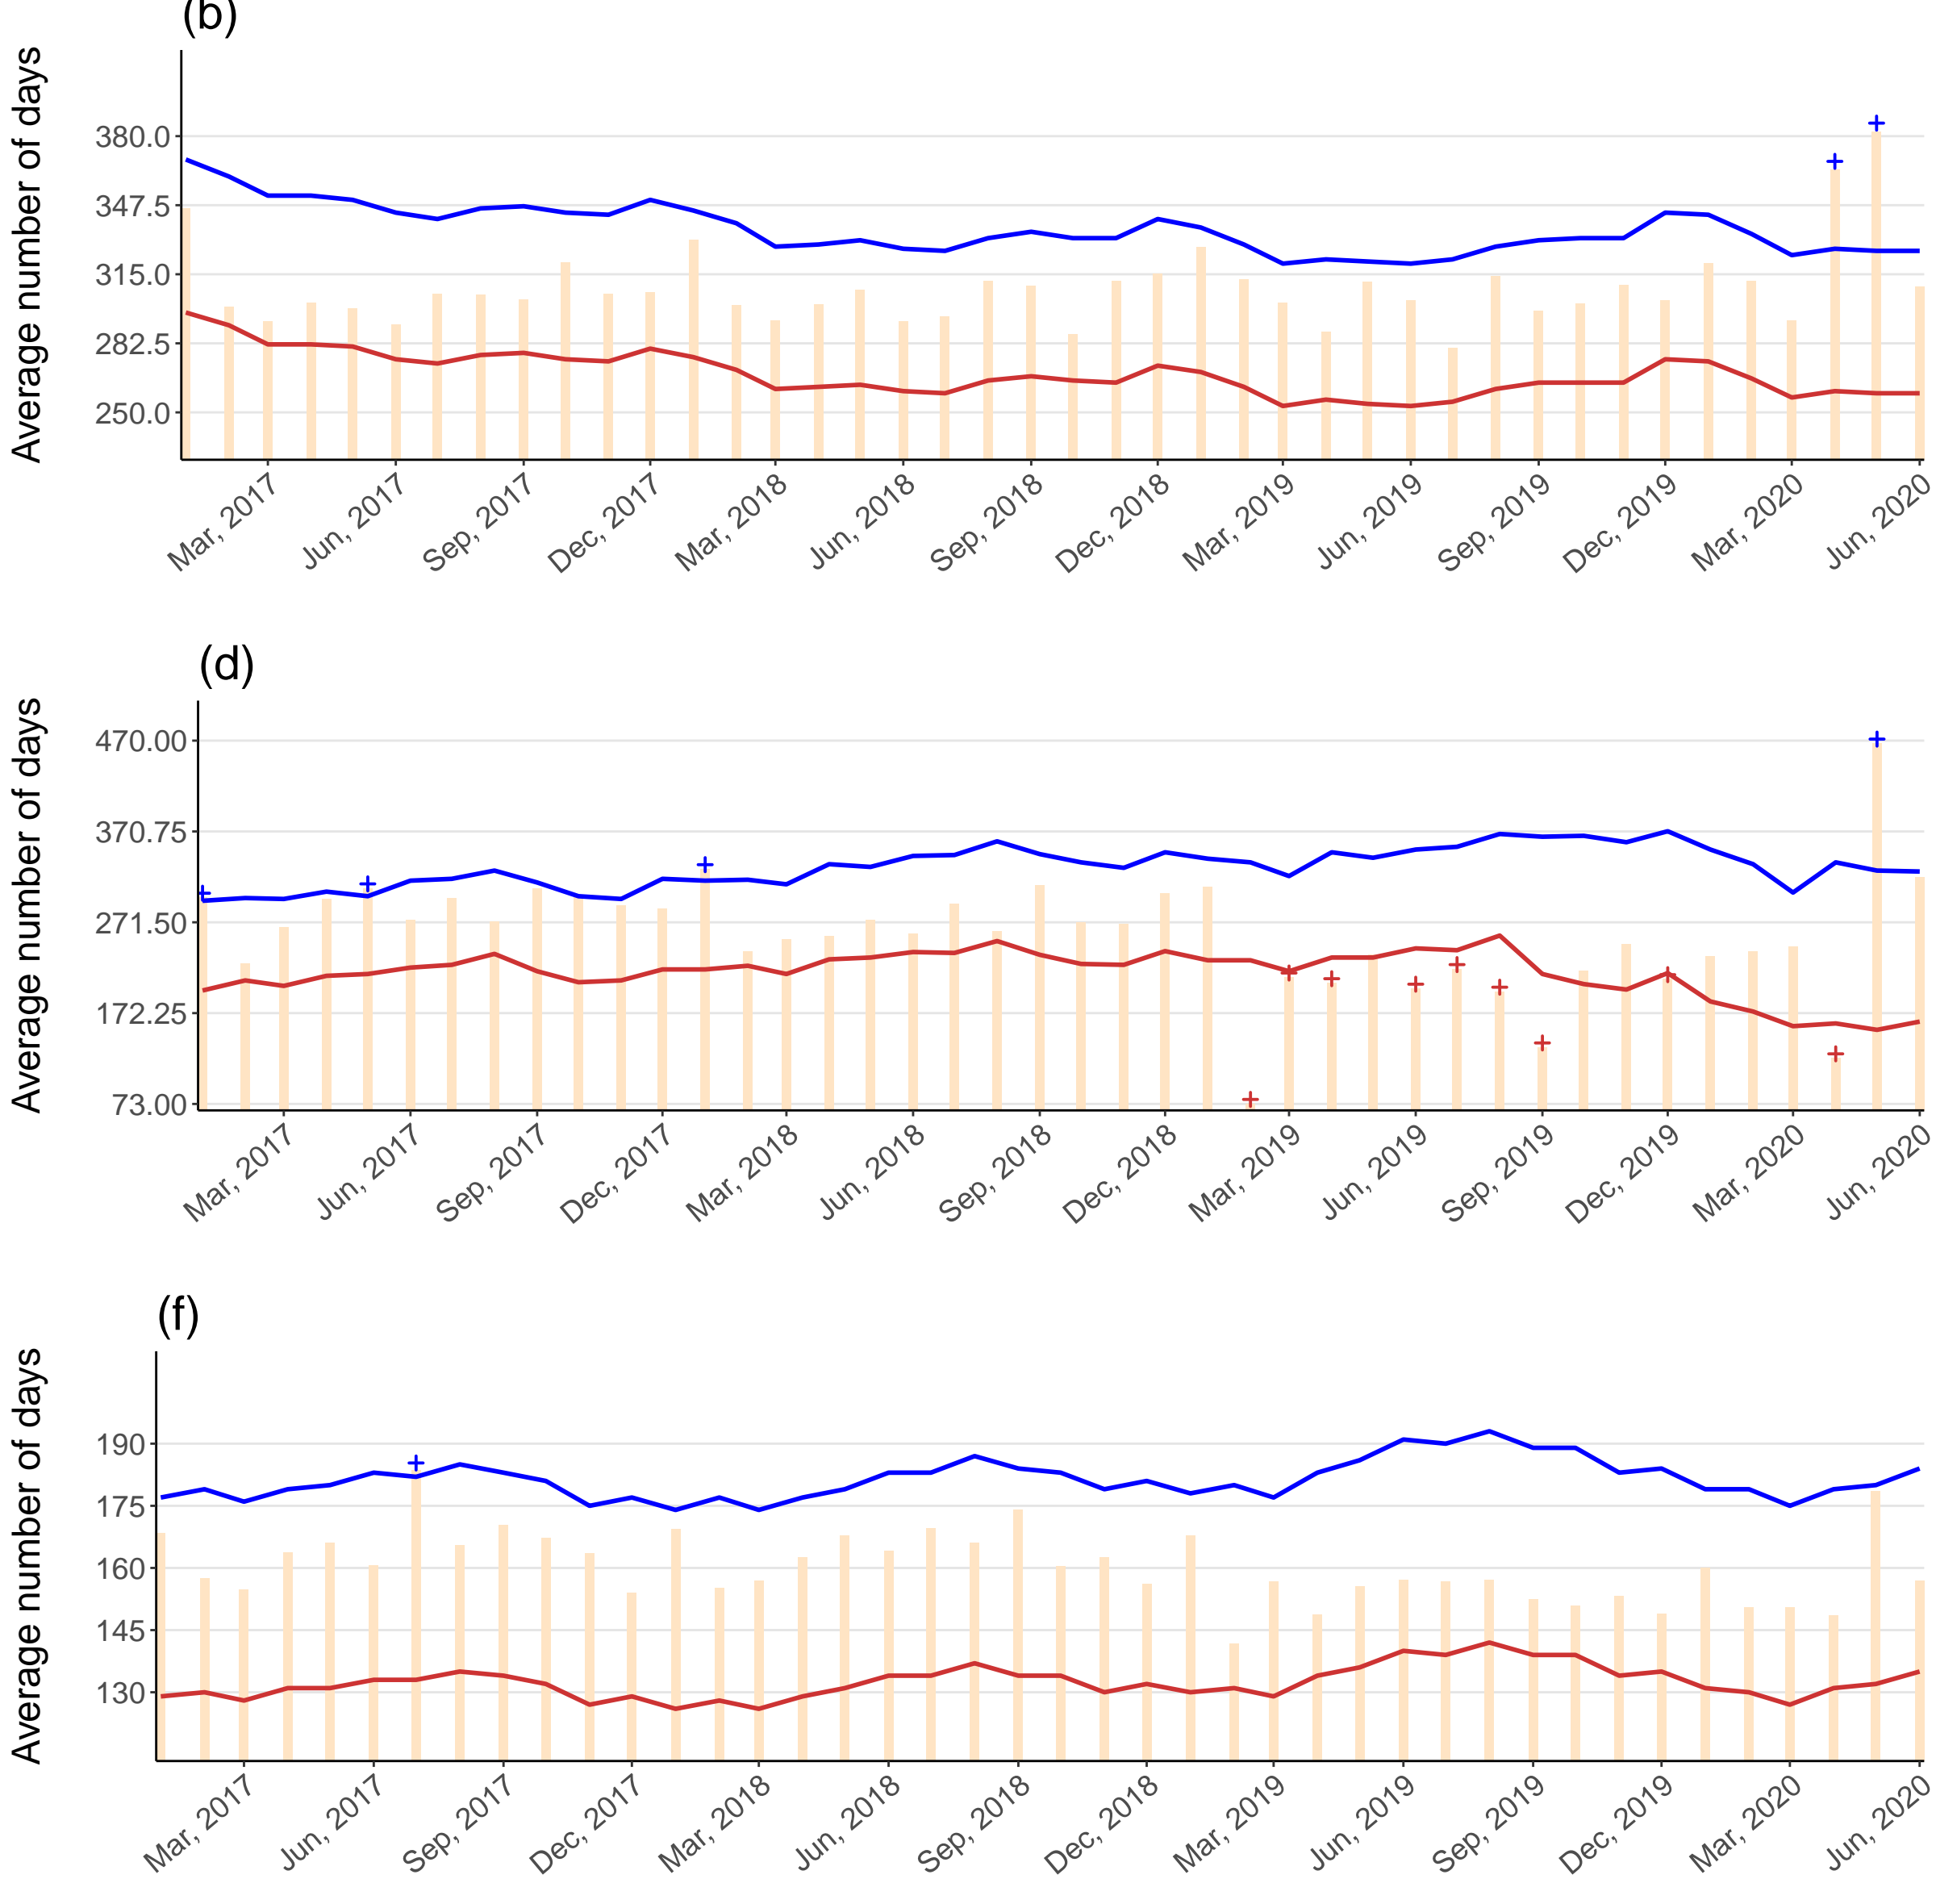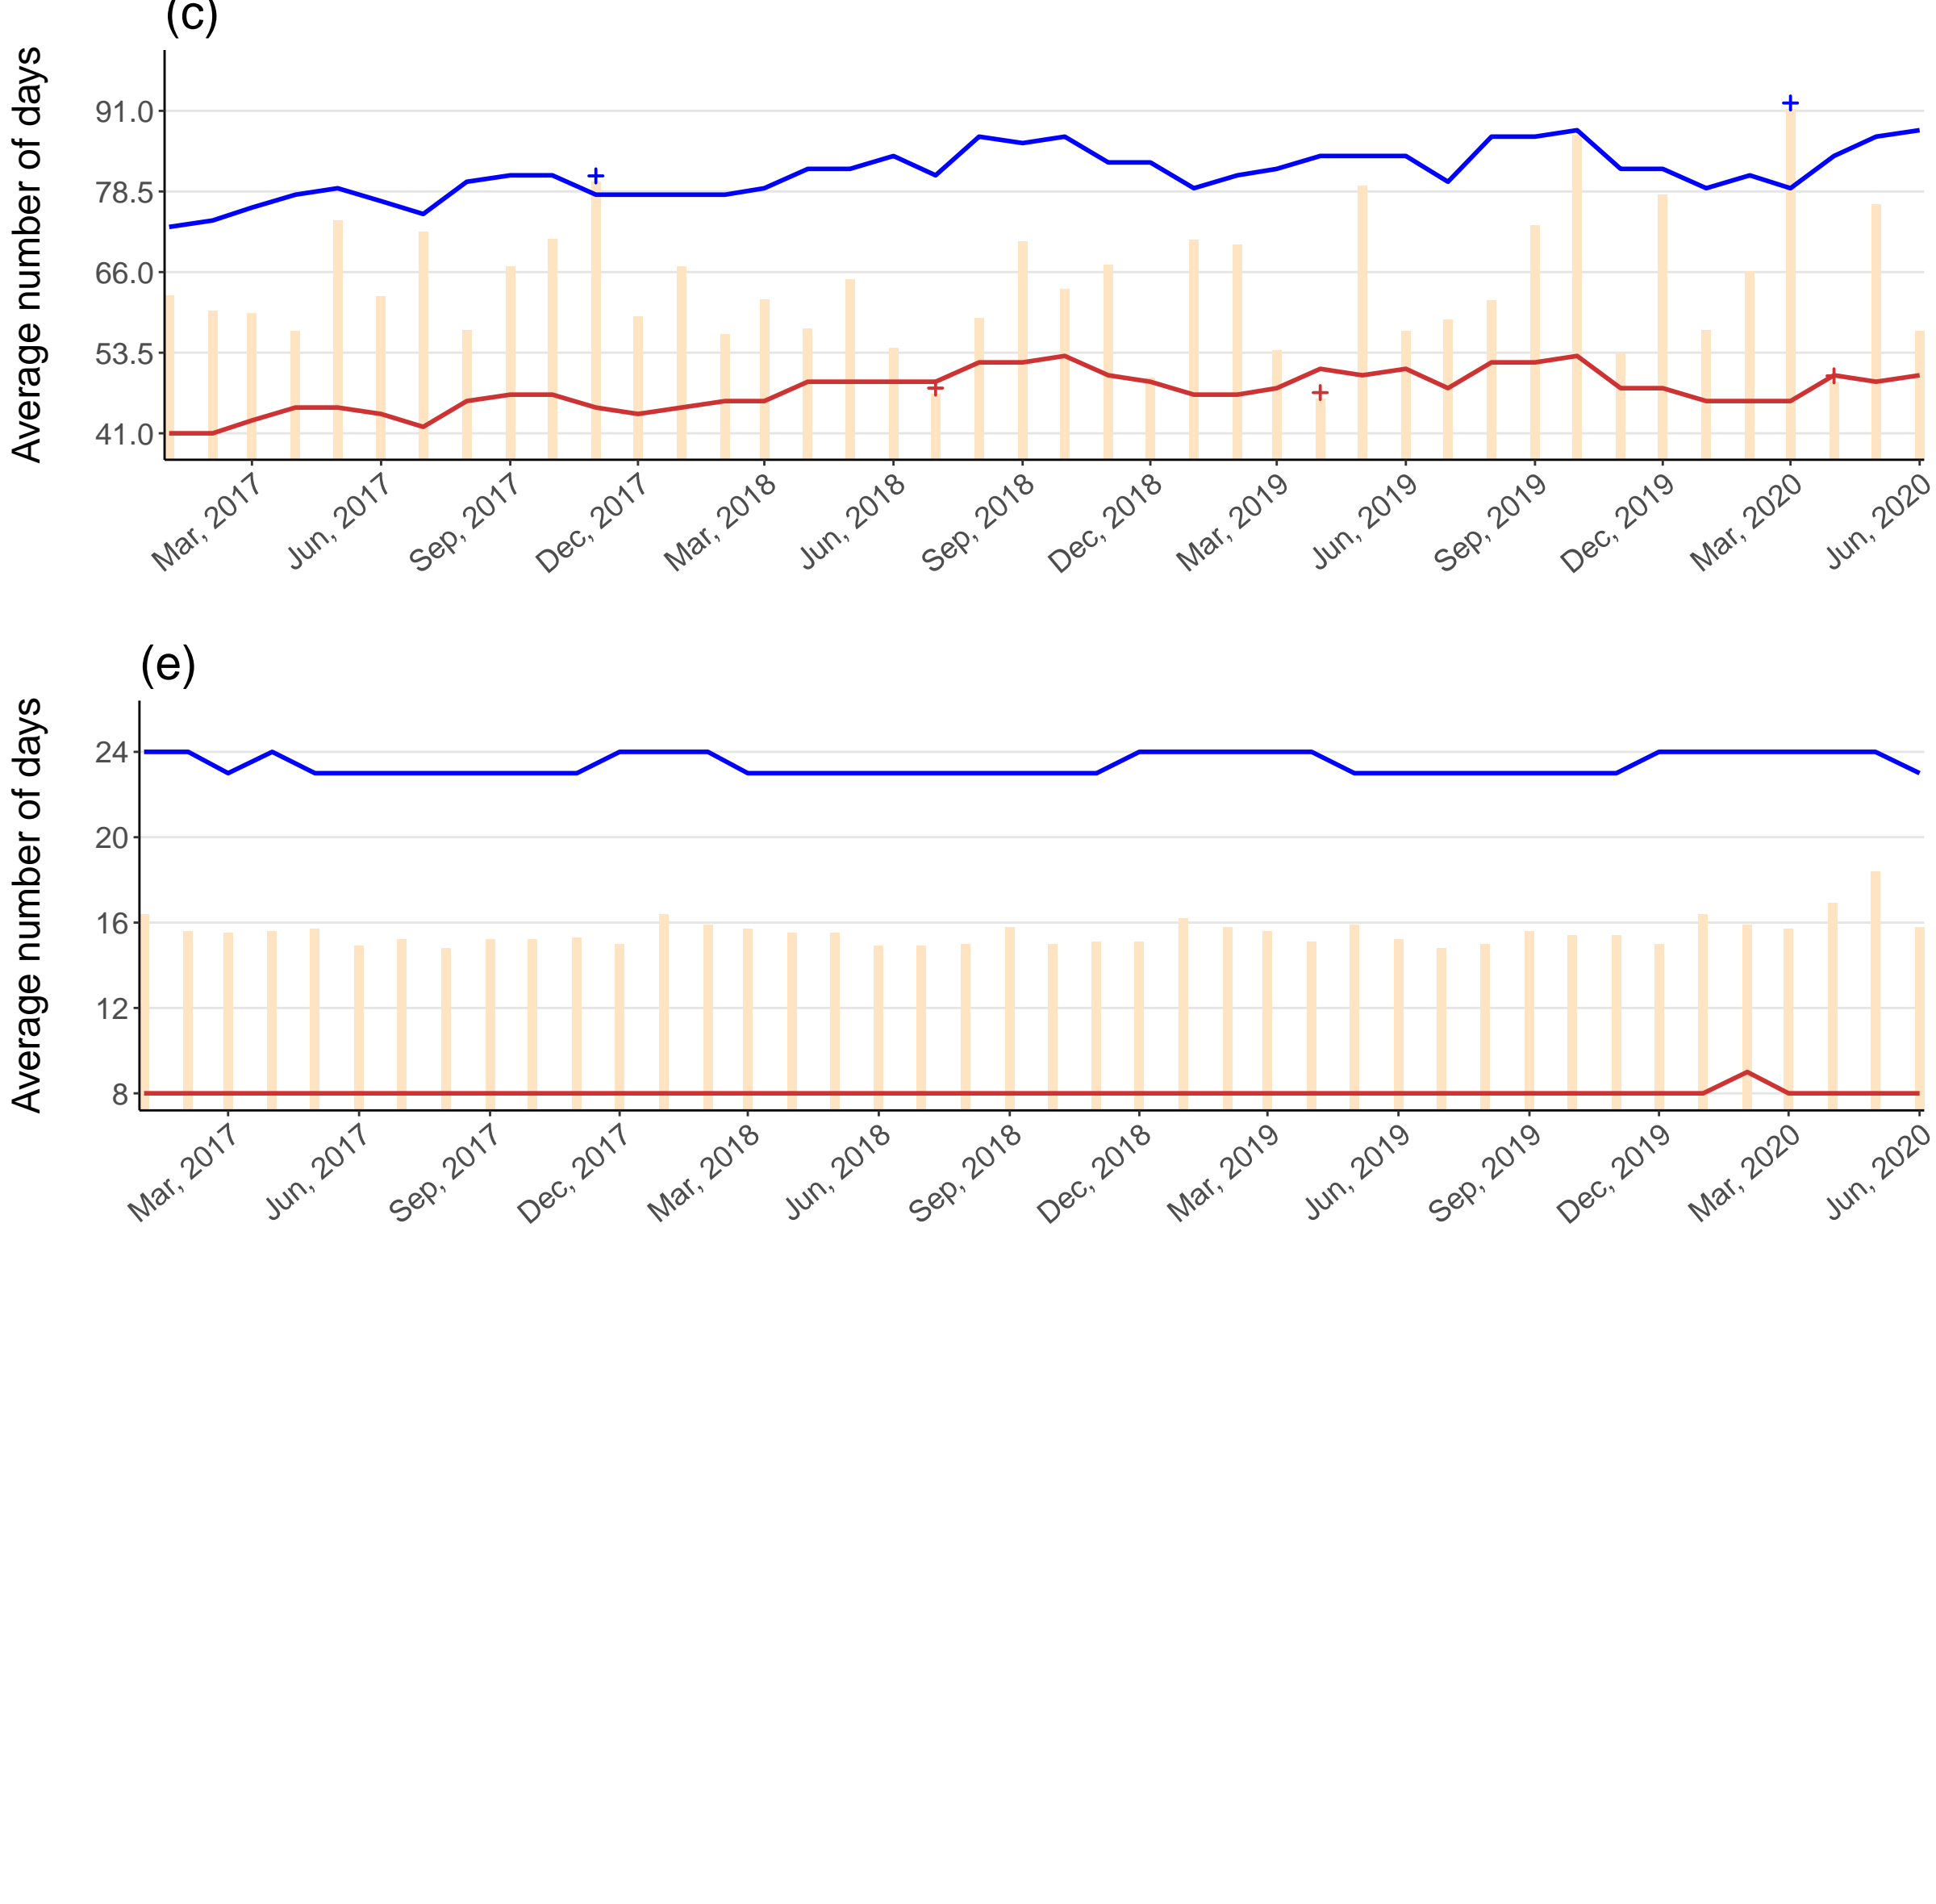

Tokyo

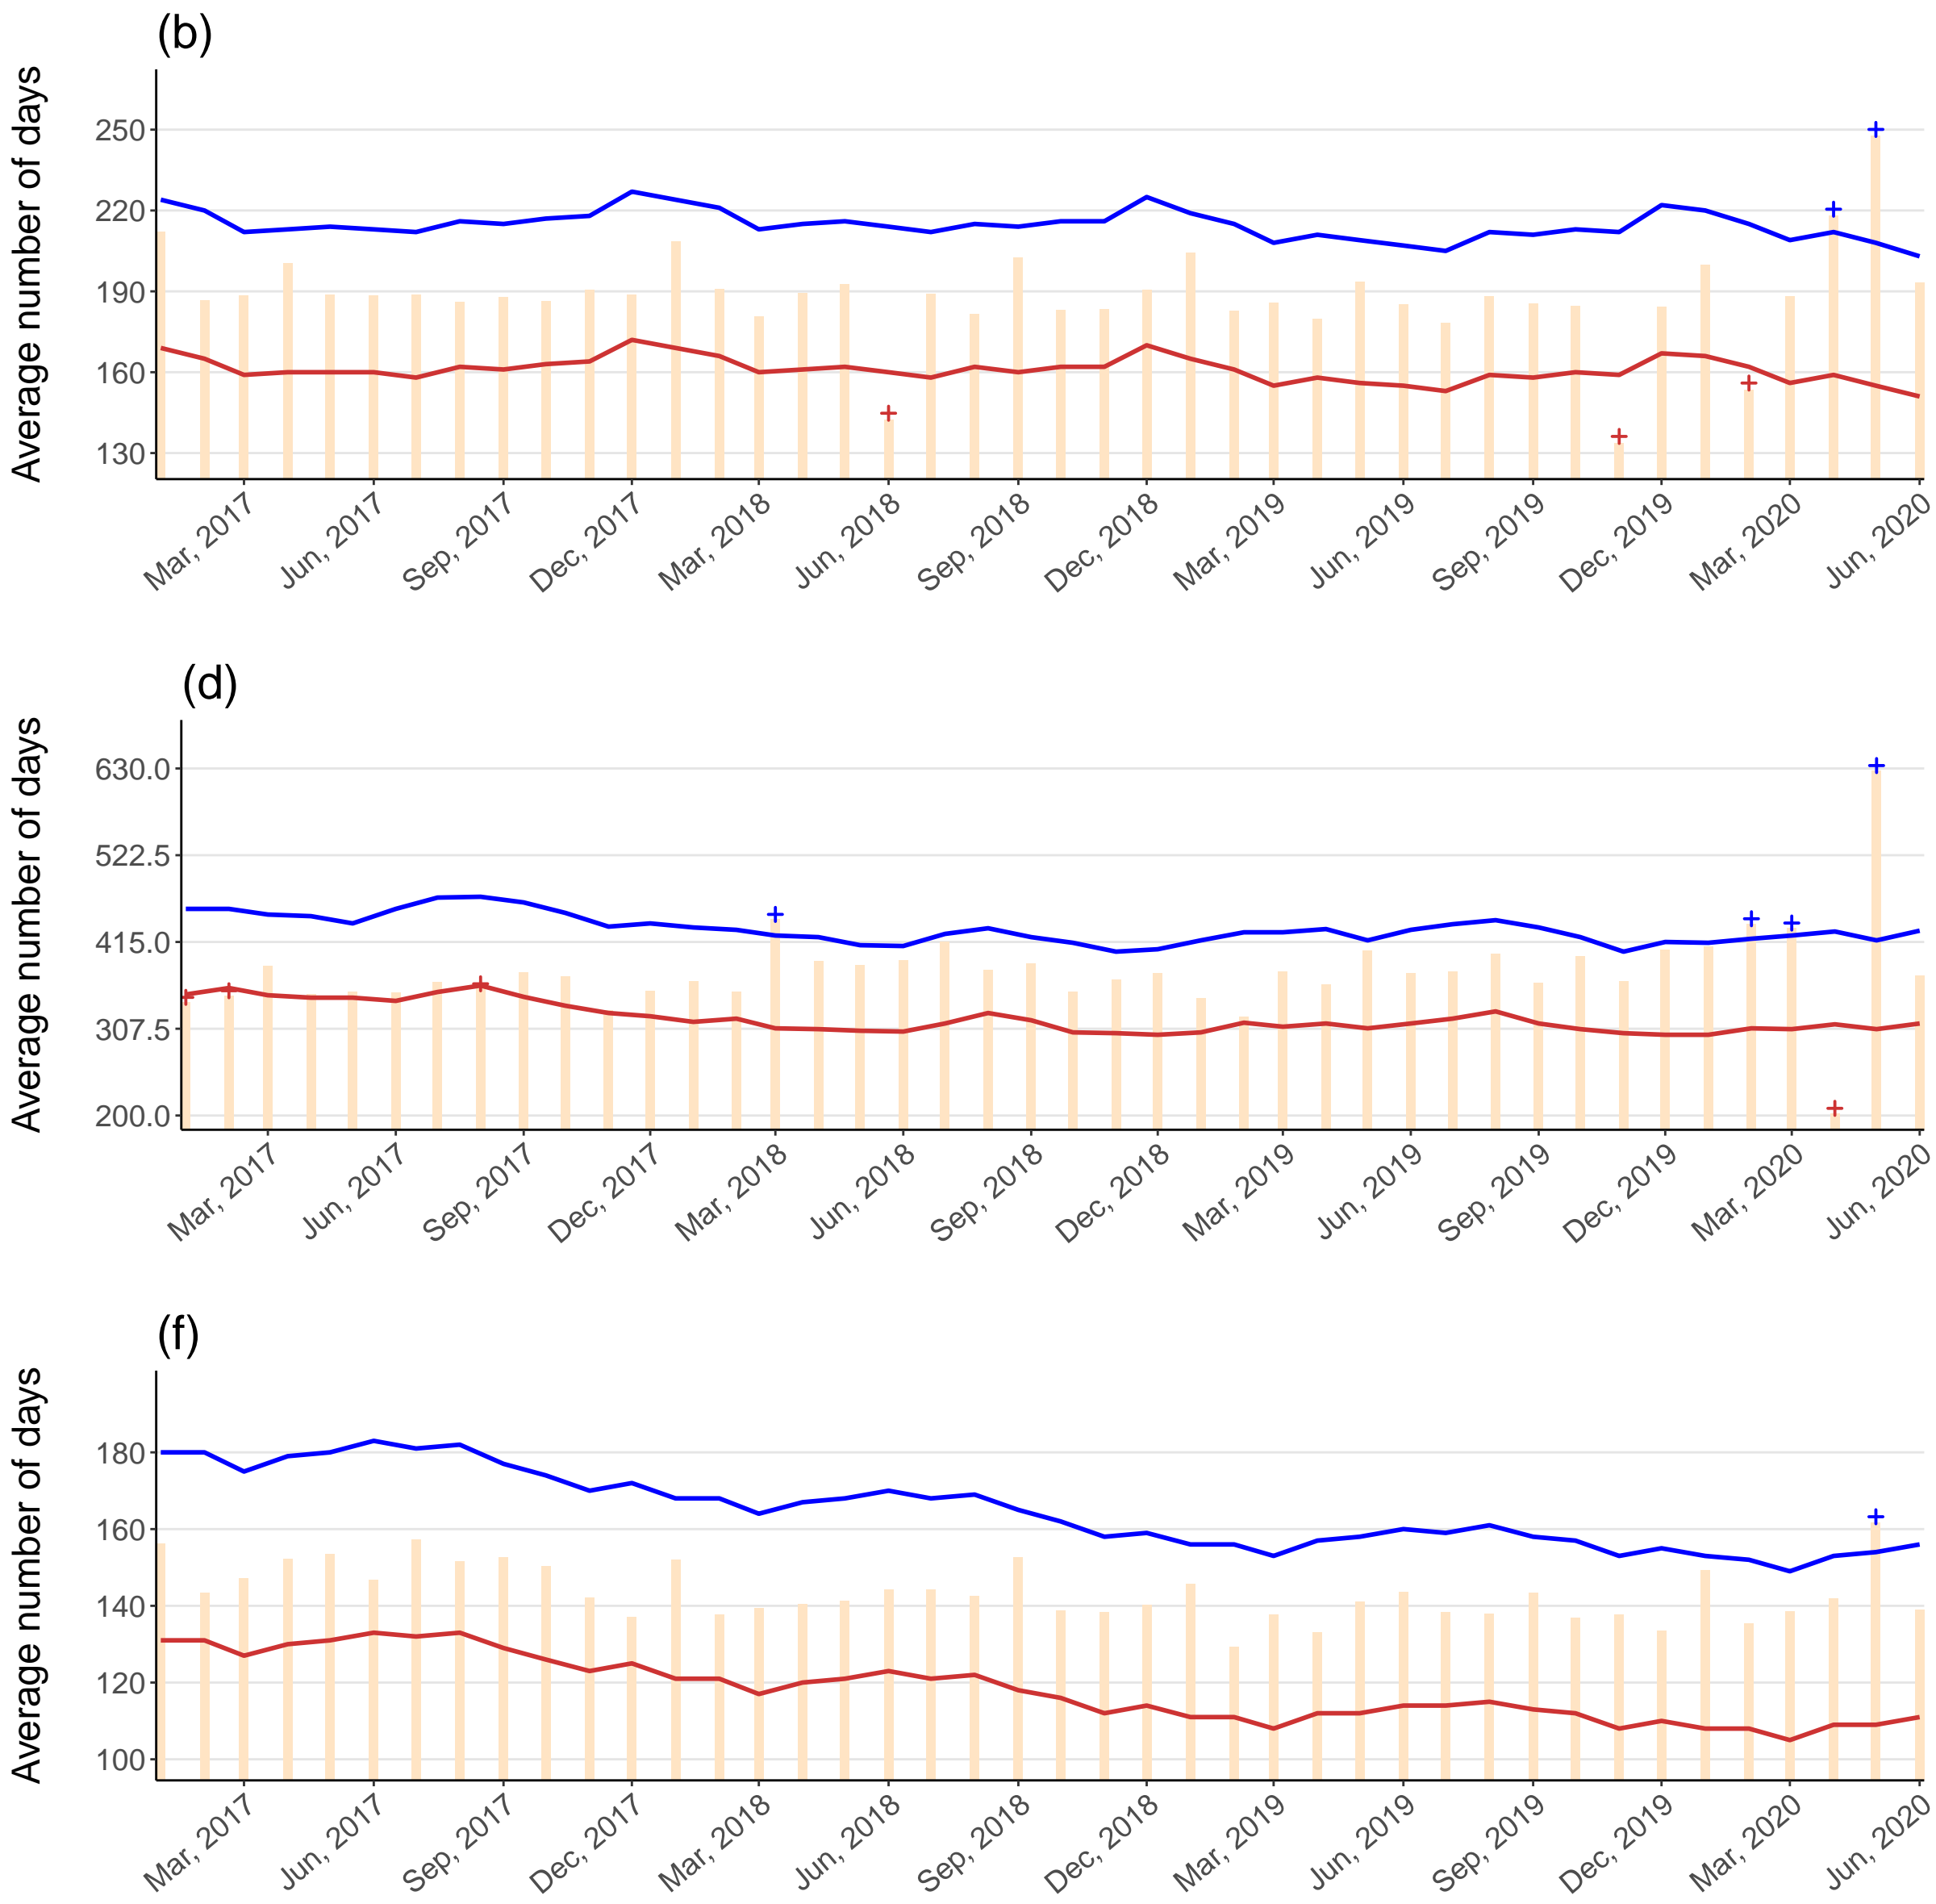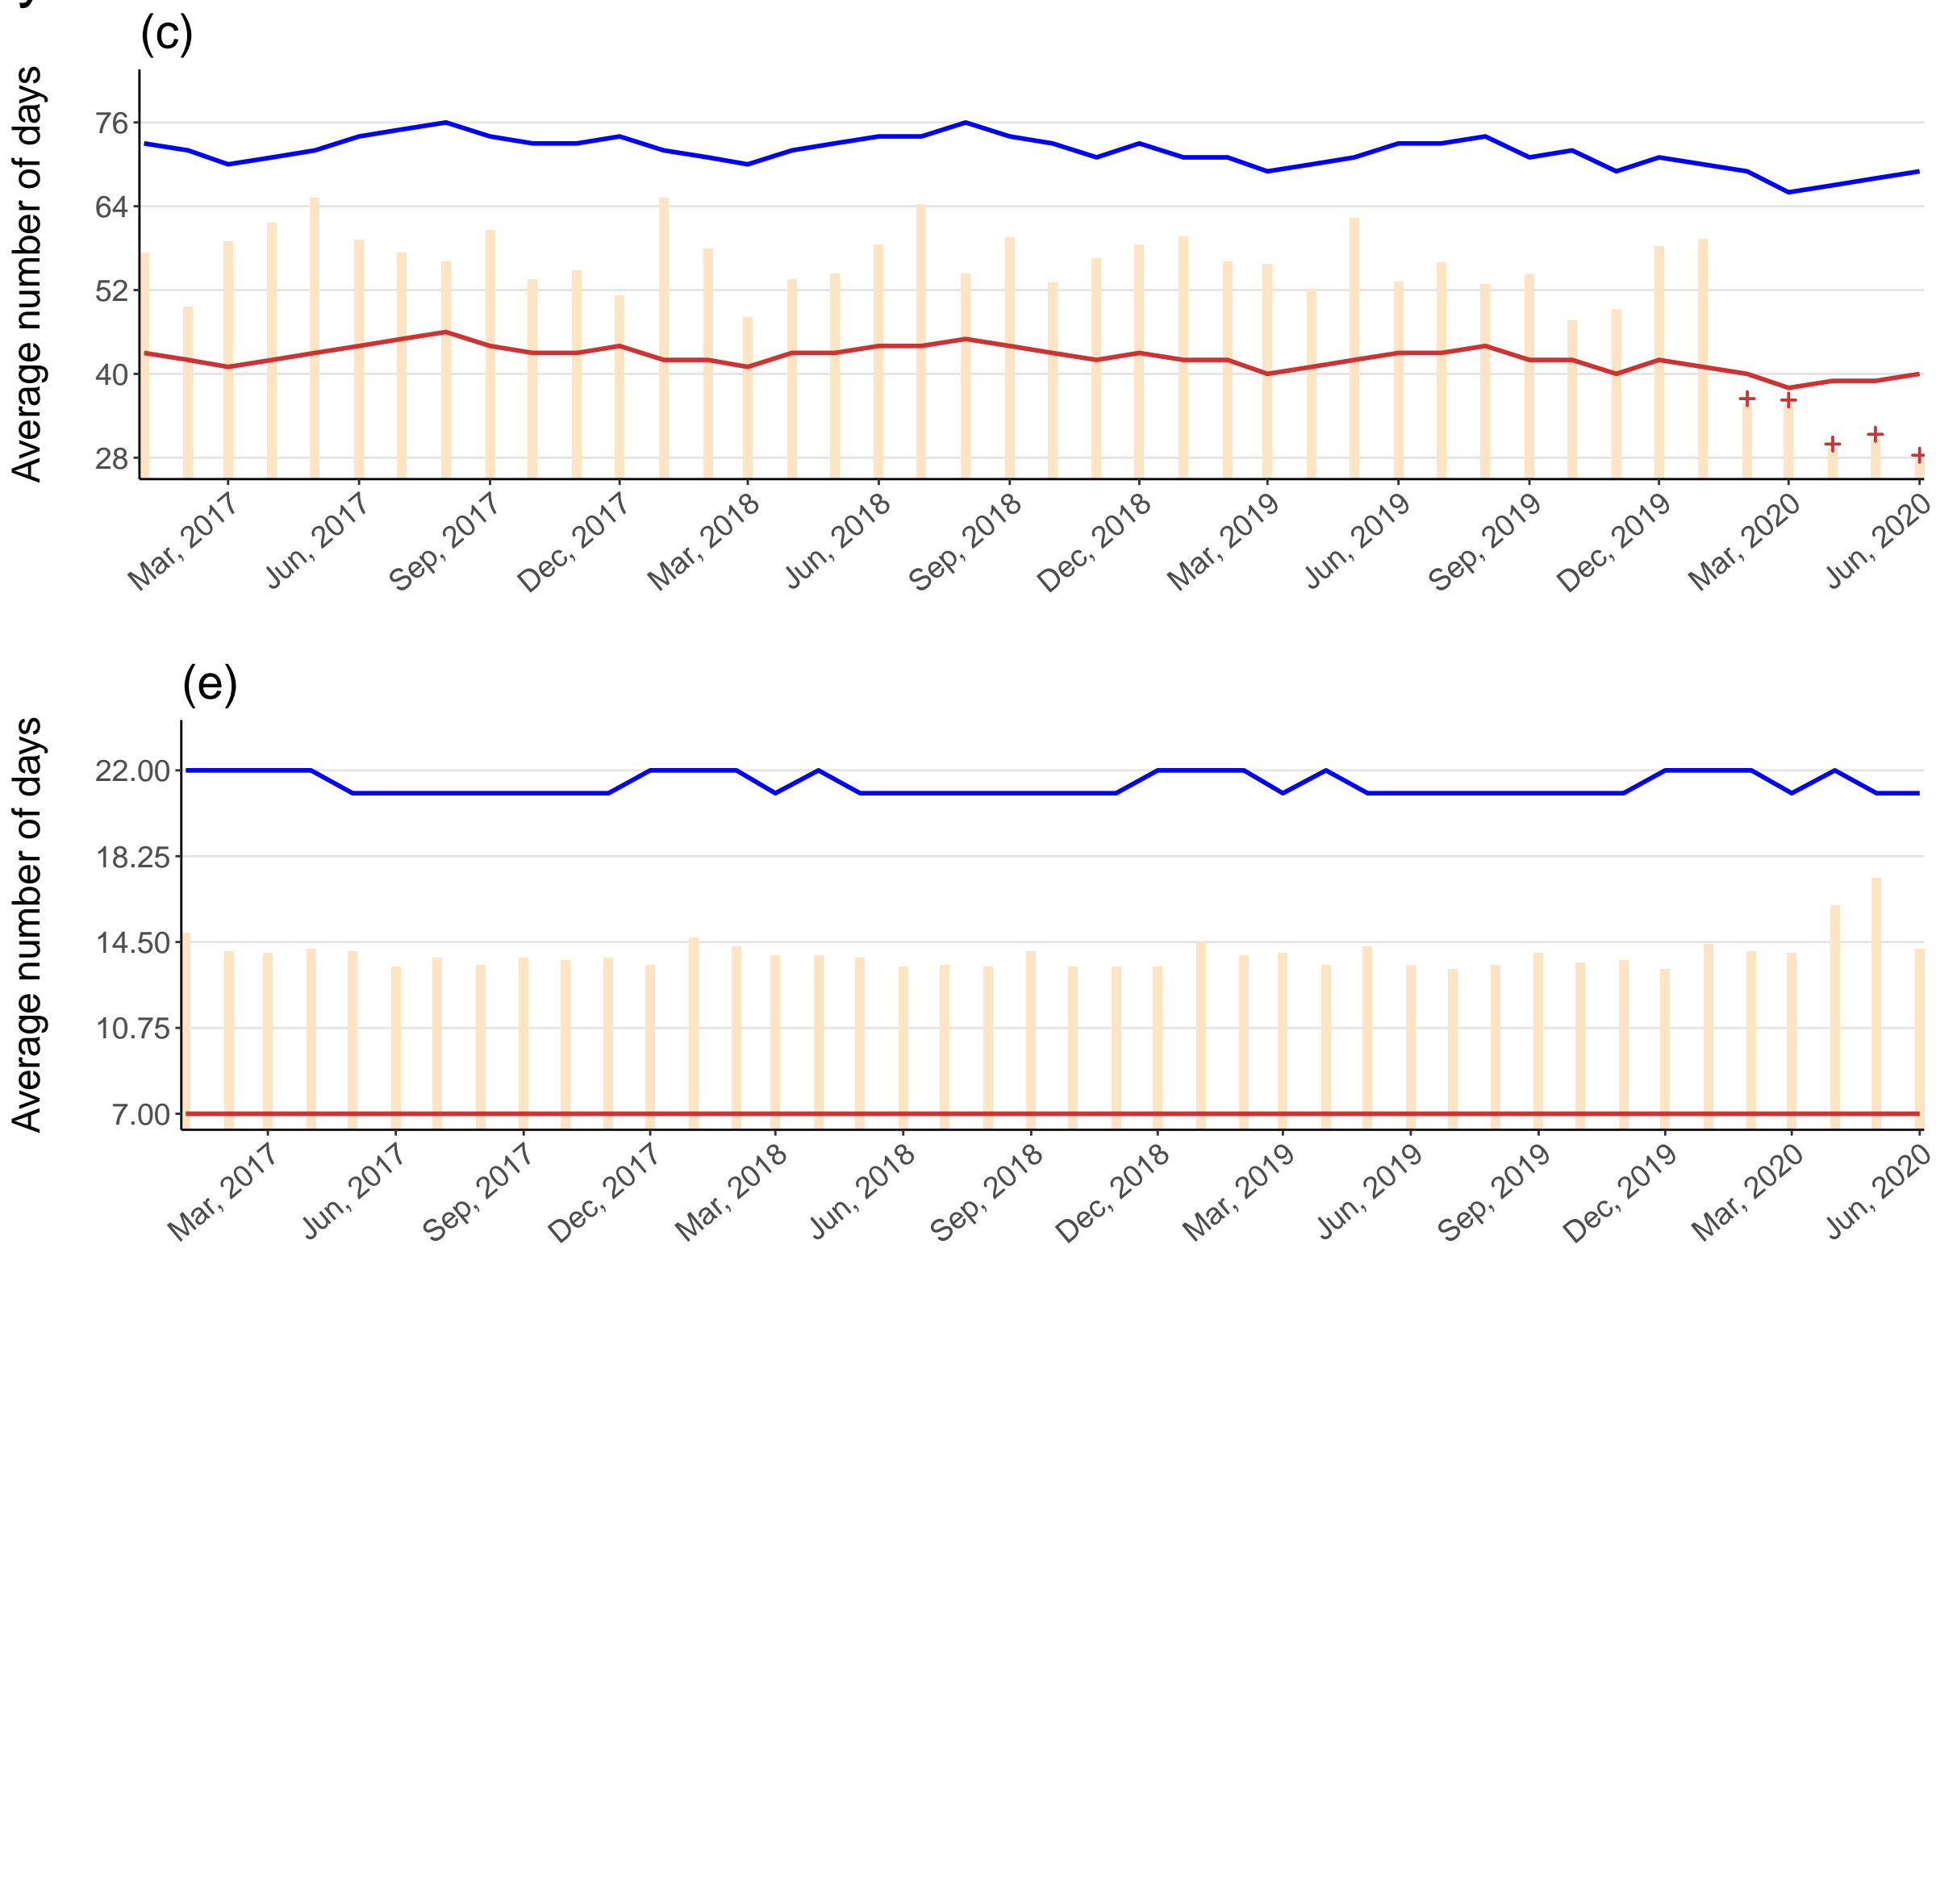

Kanagawa

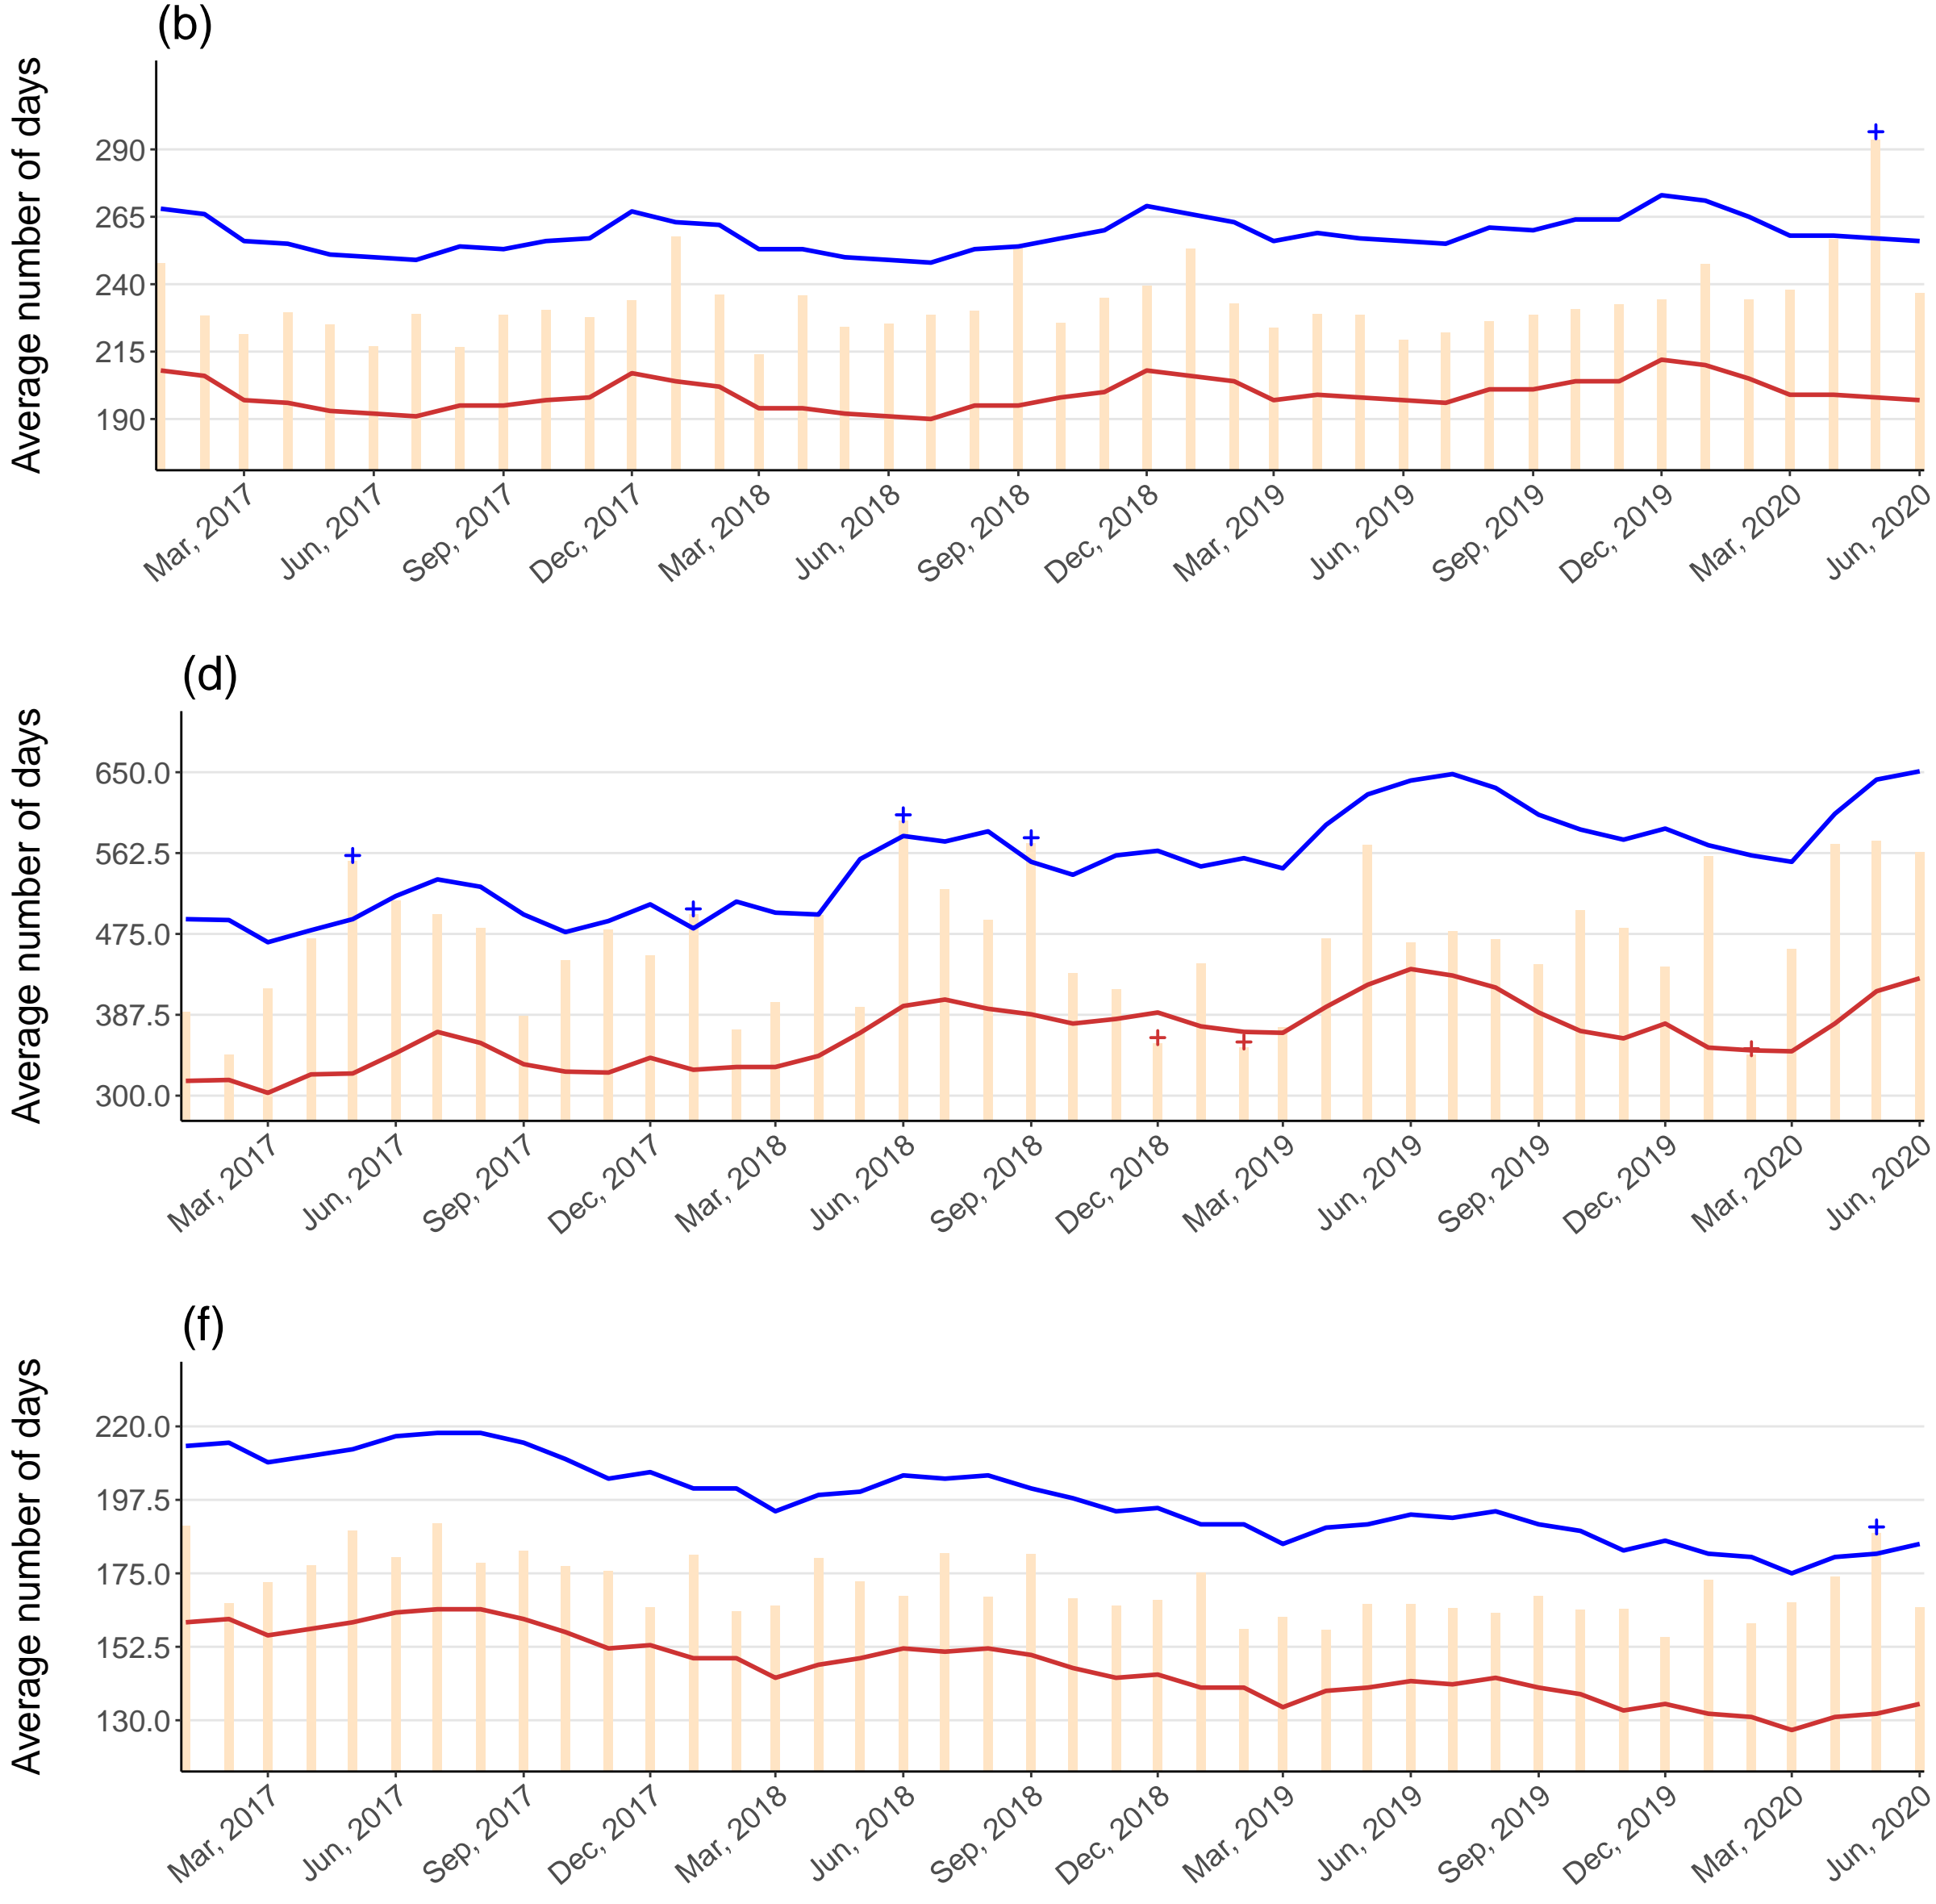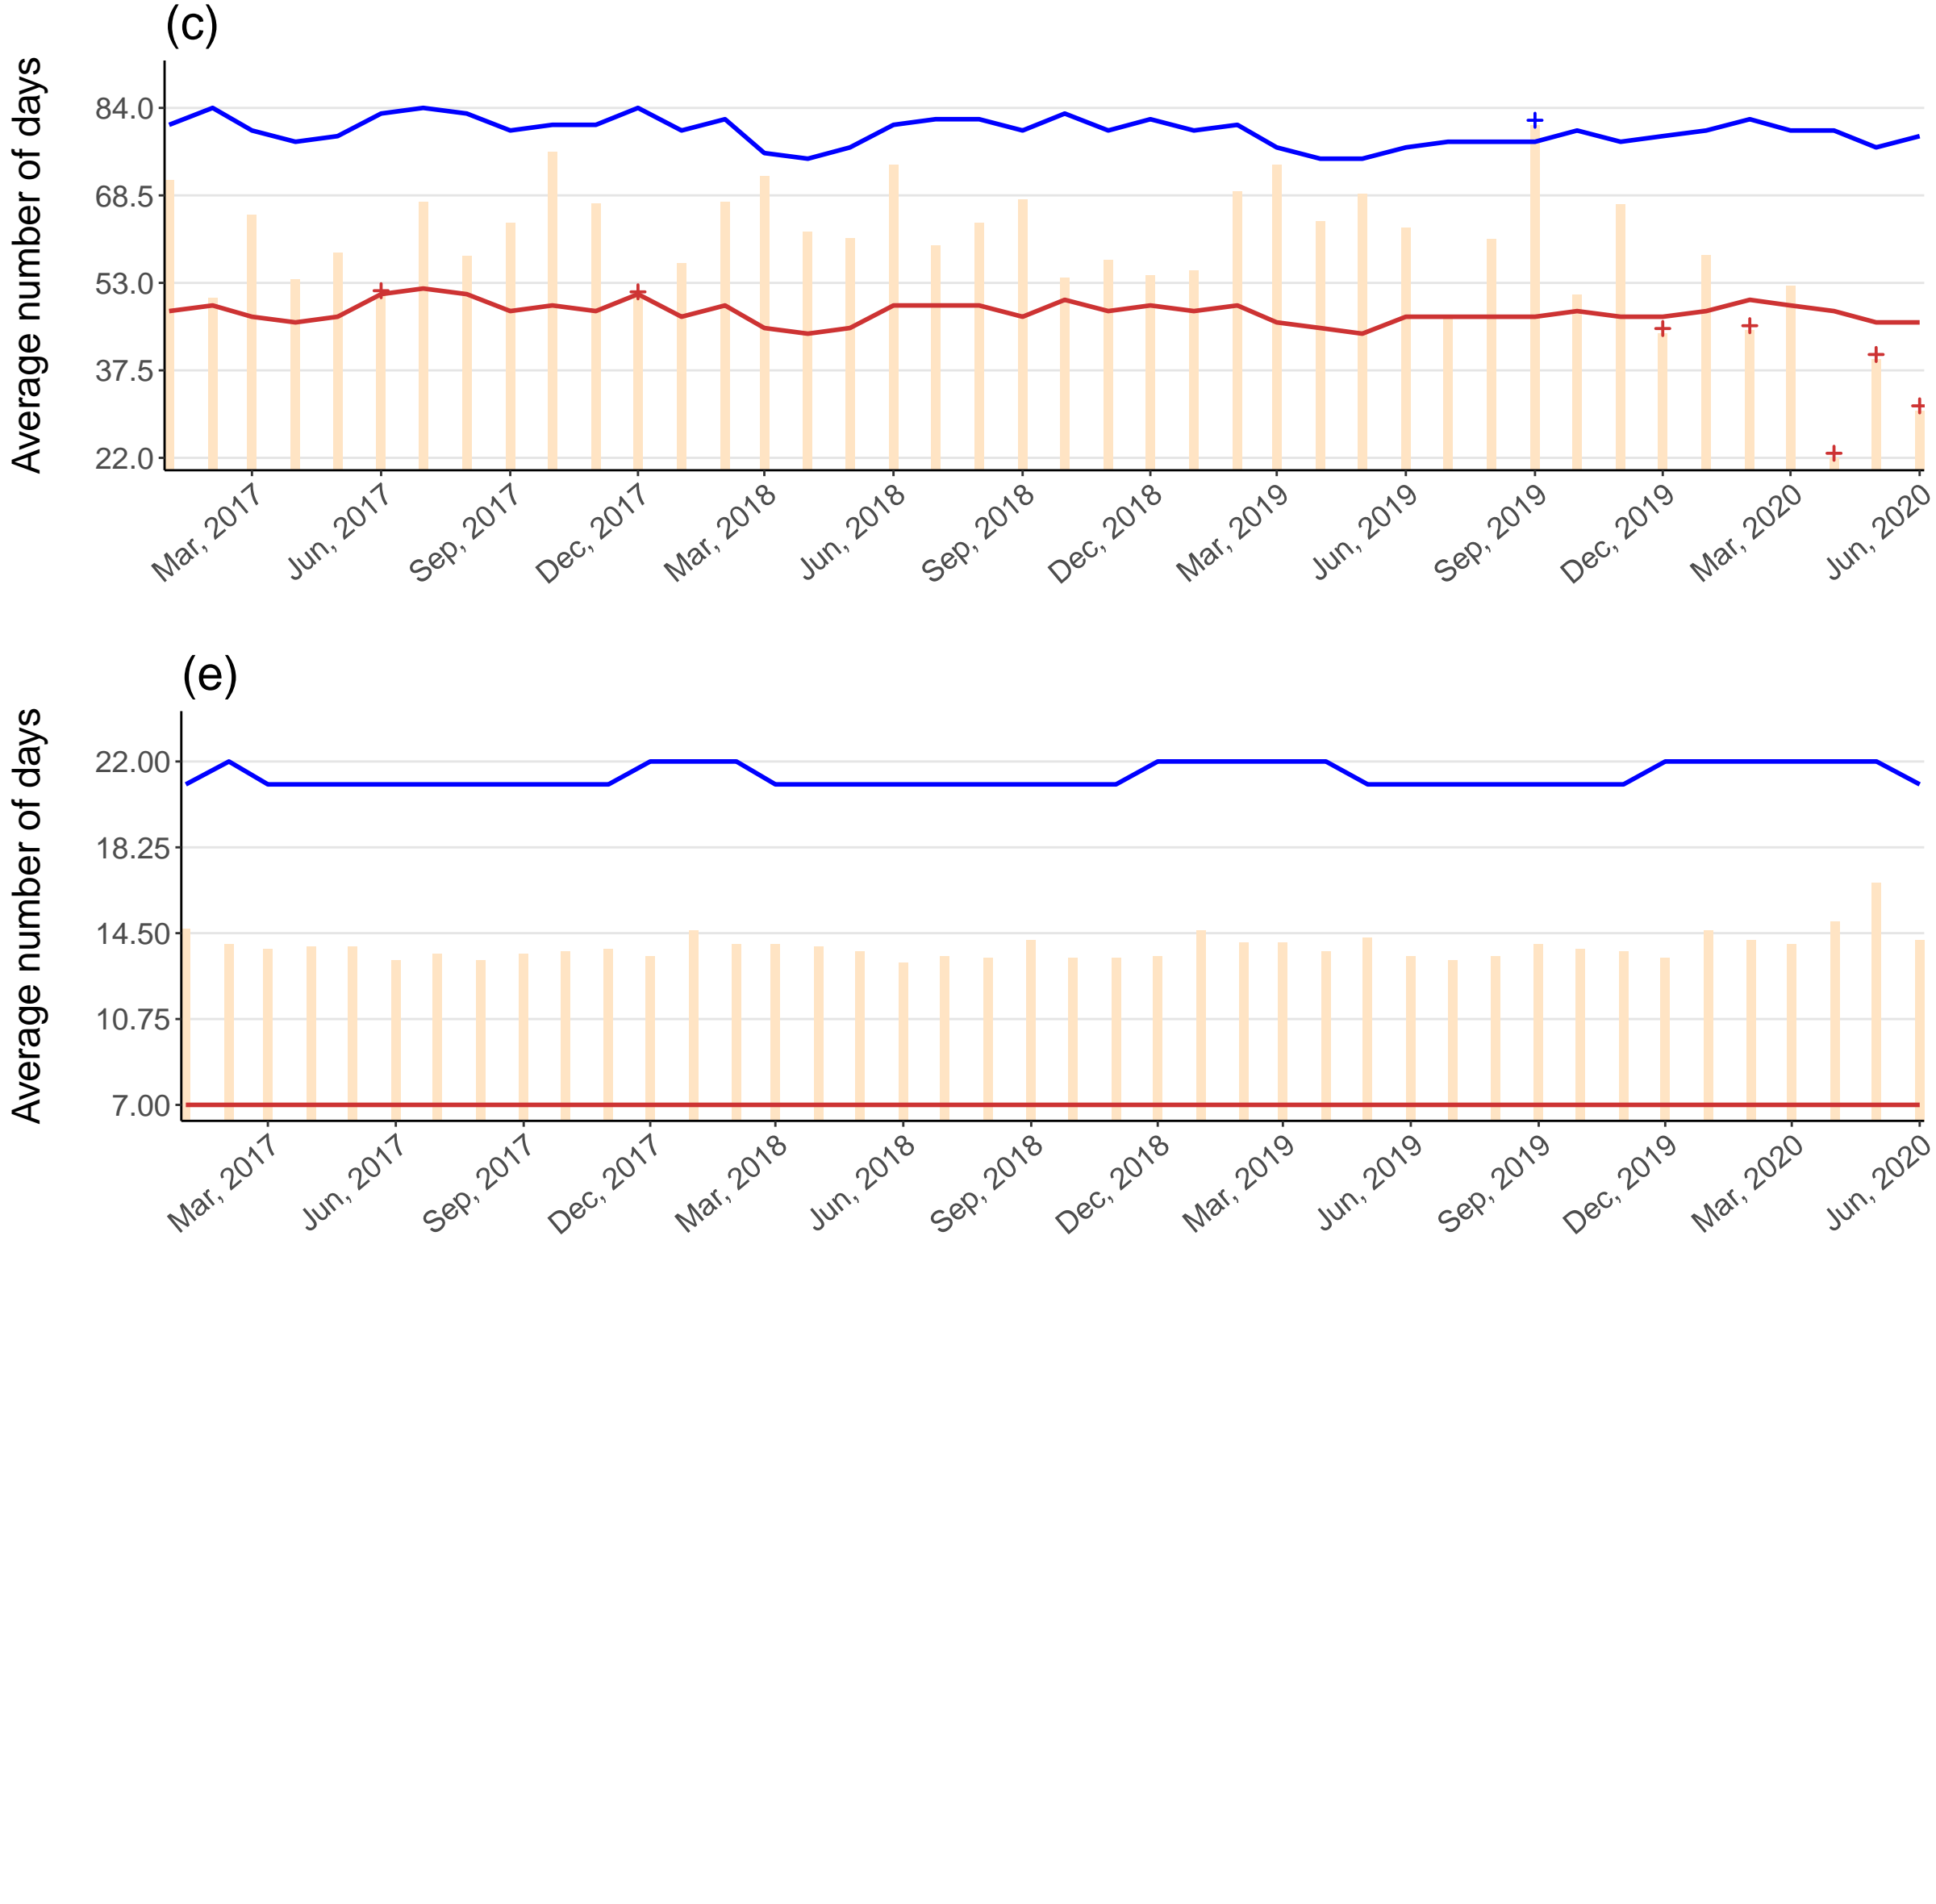

Niigata

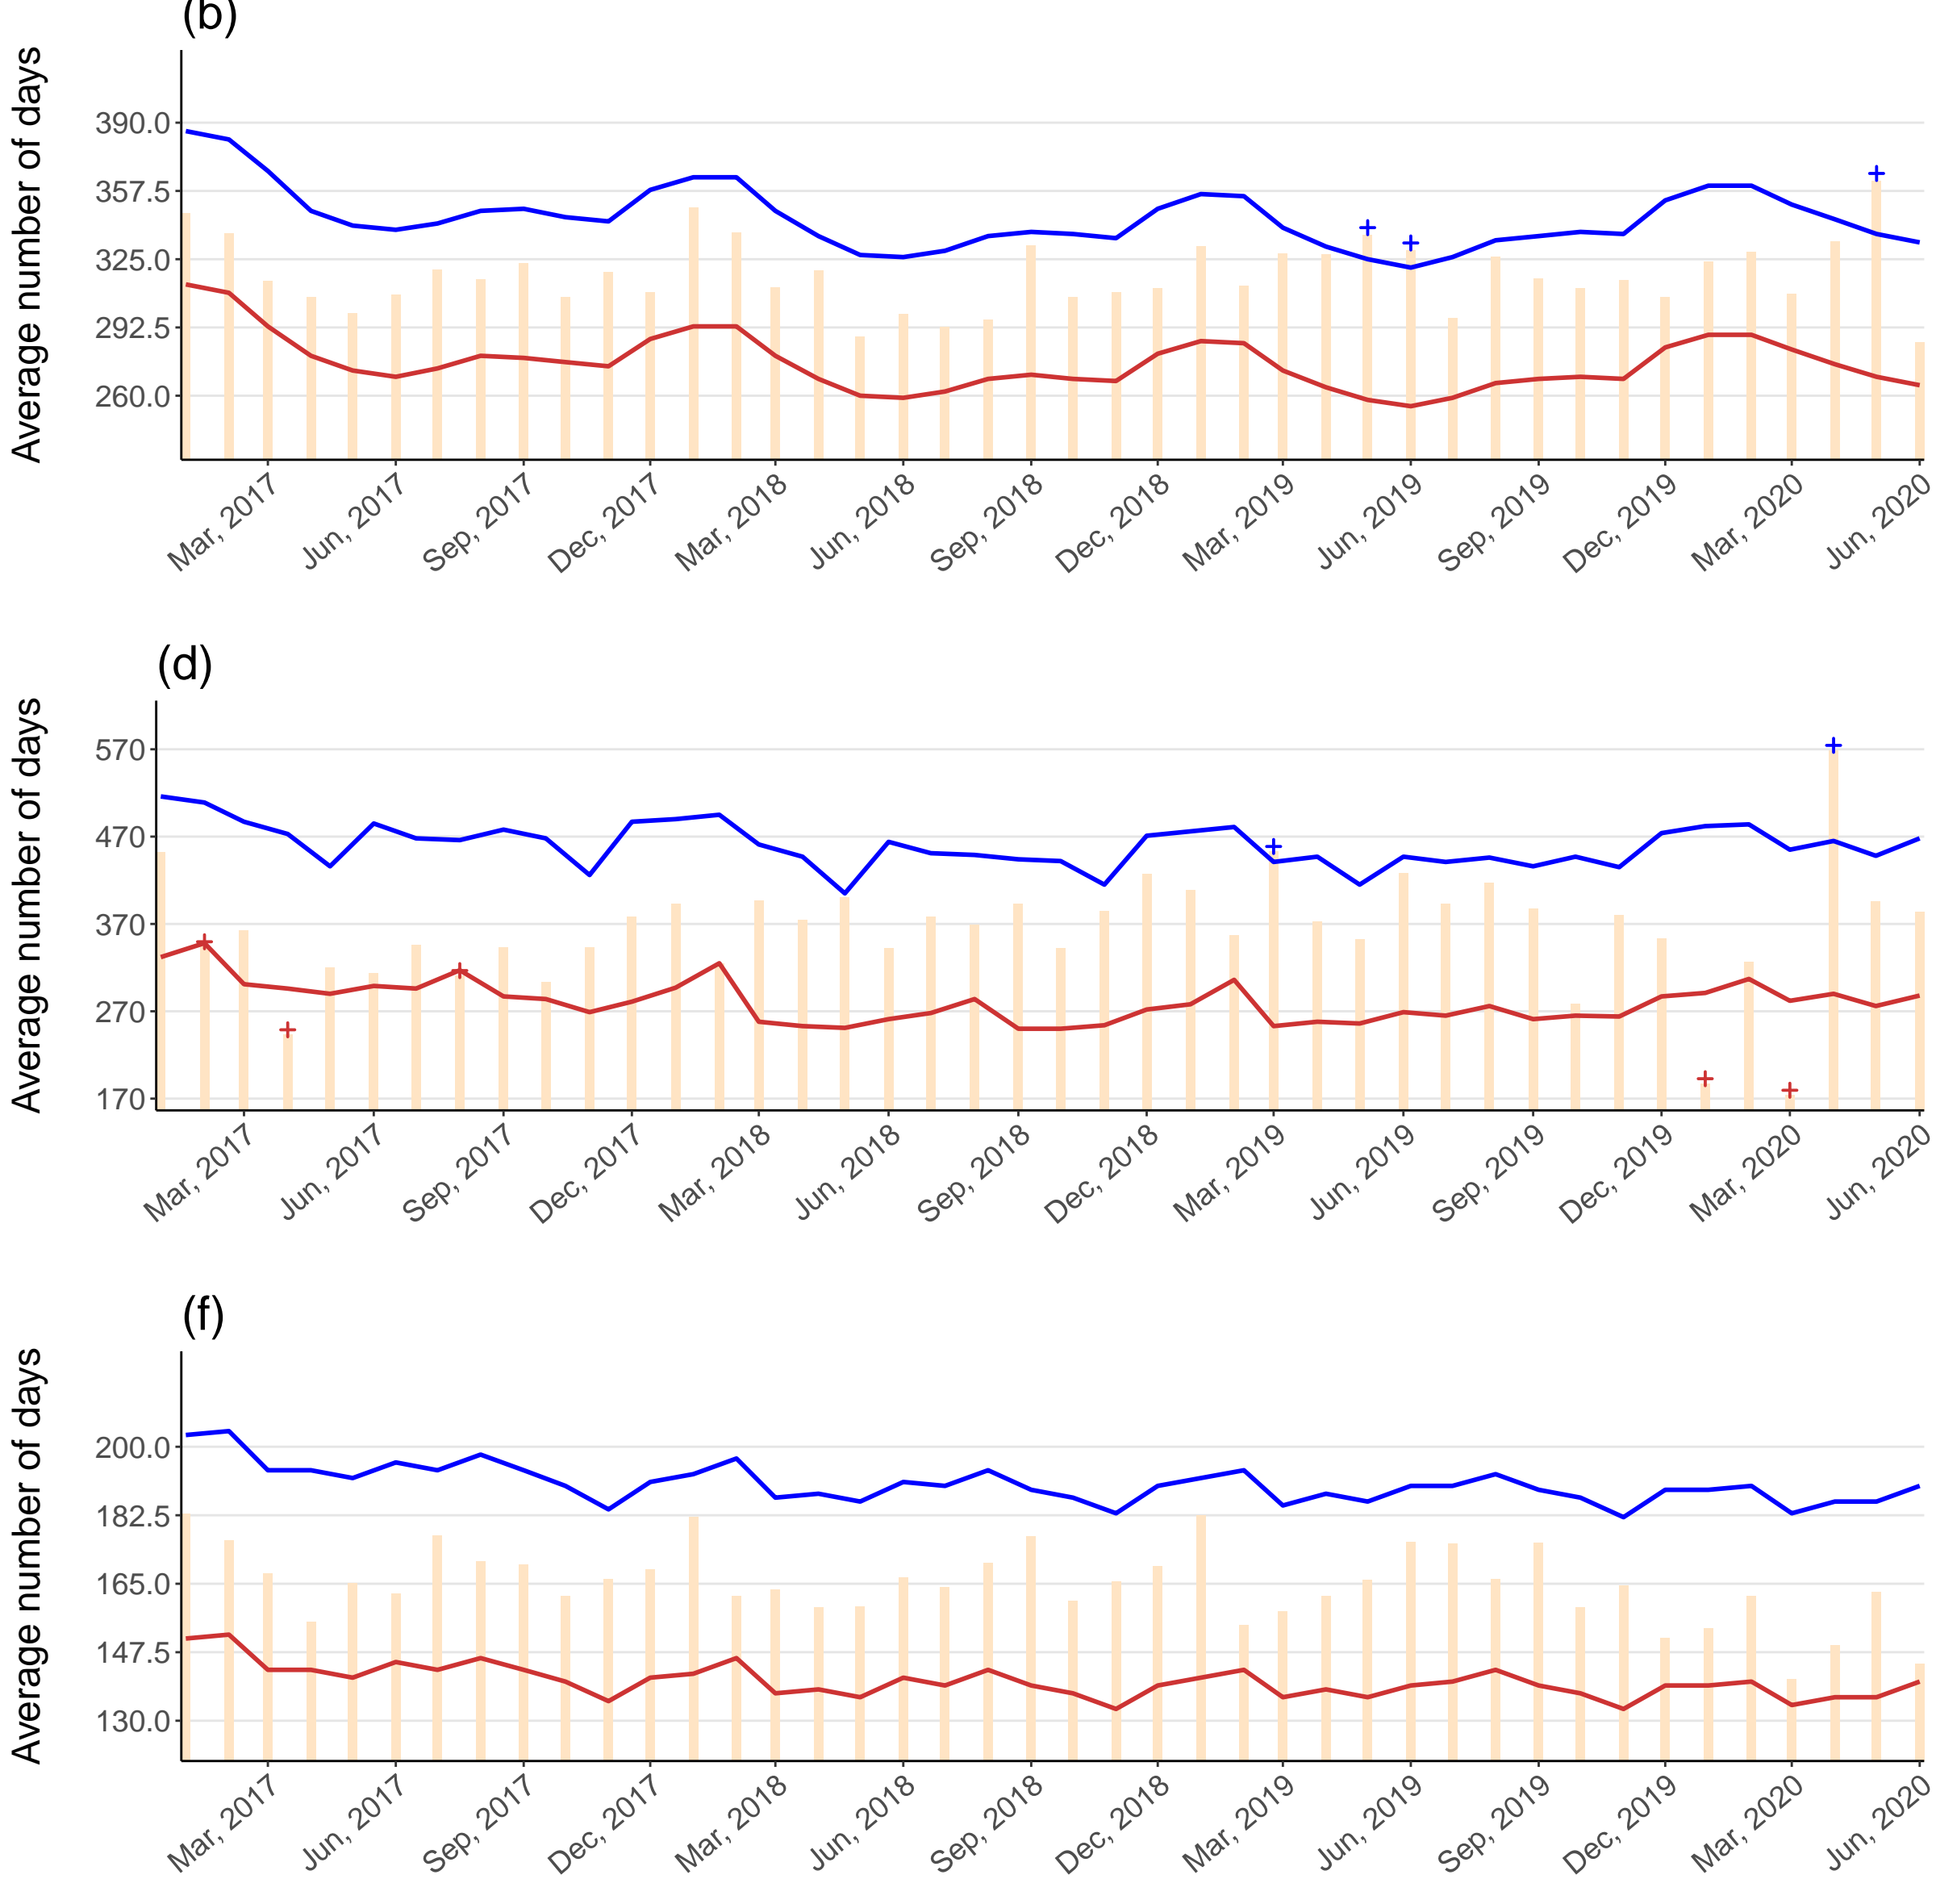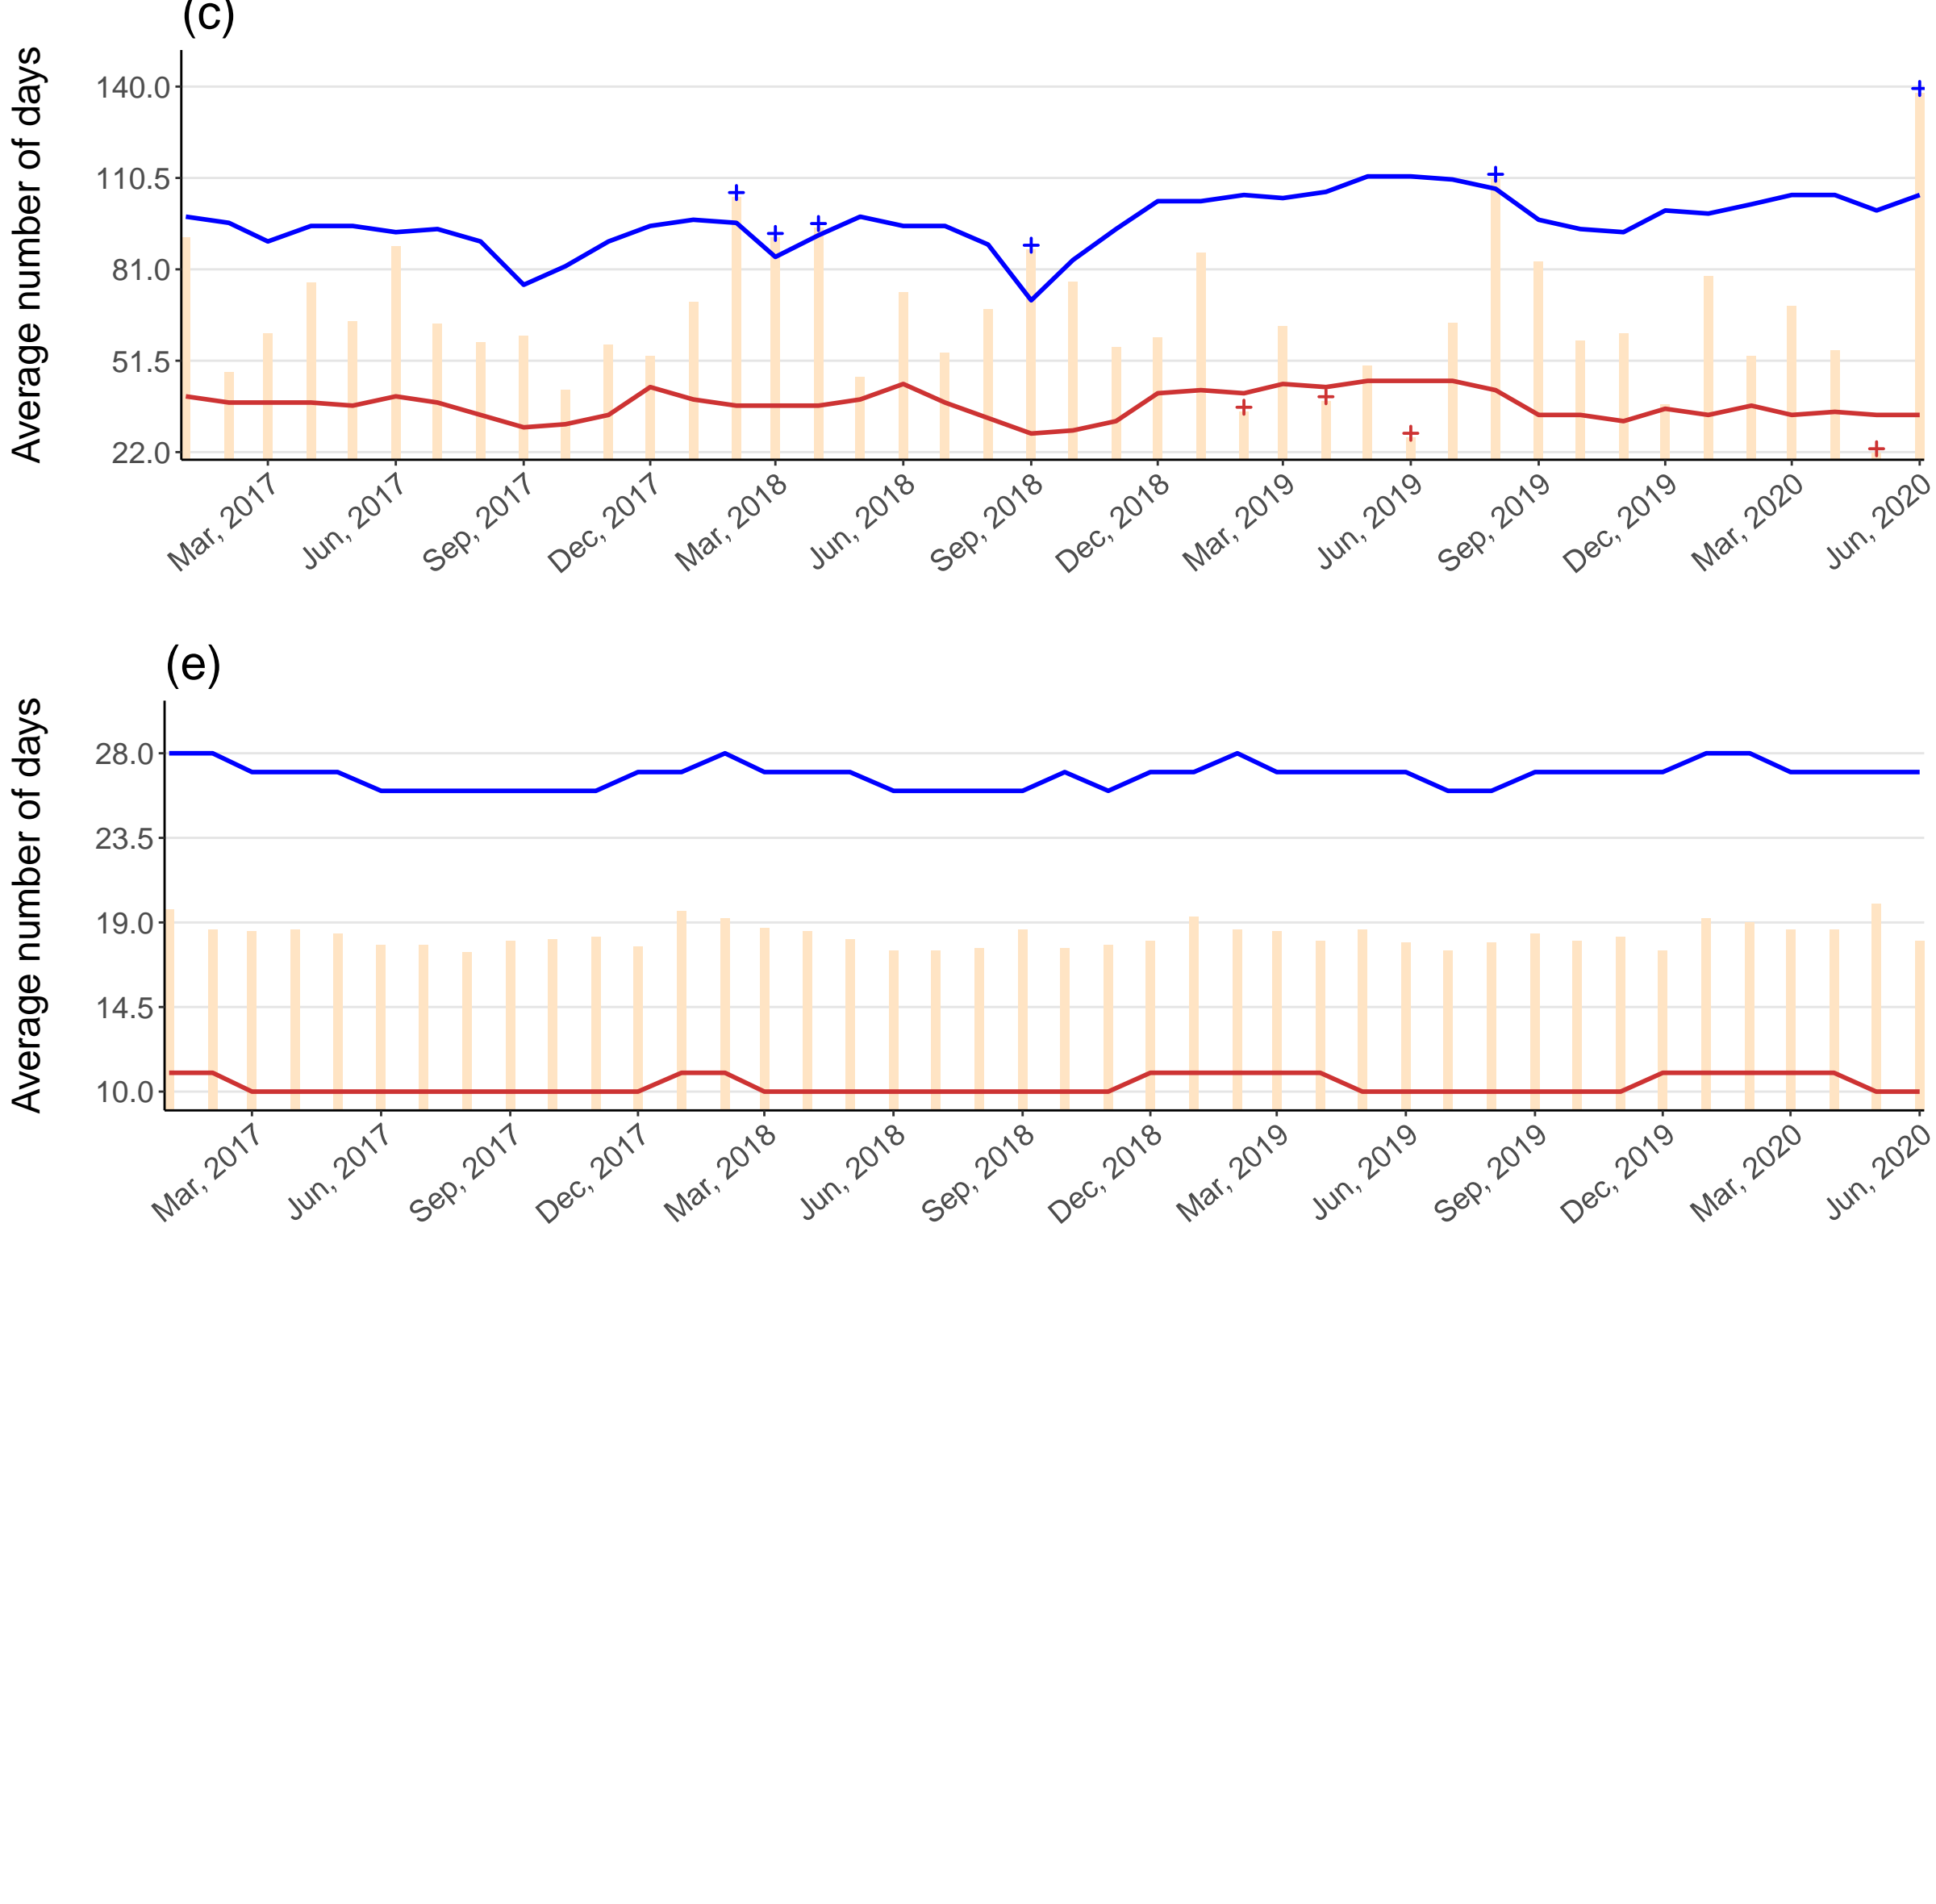



Toyama

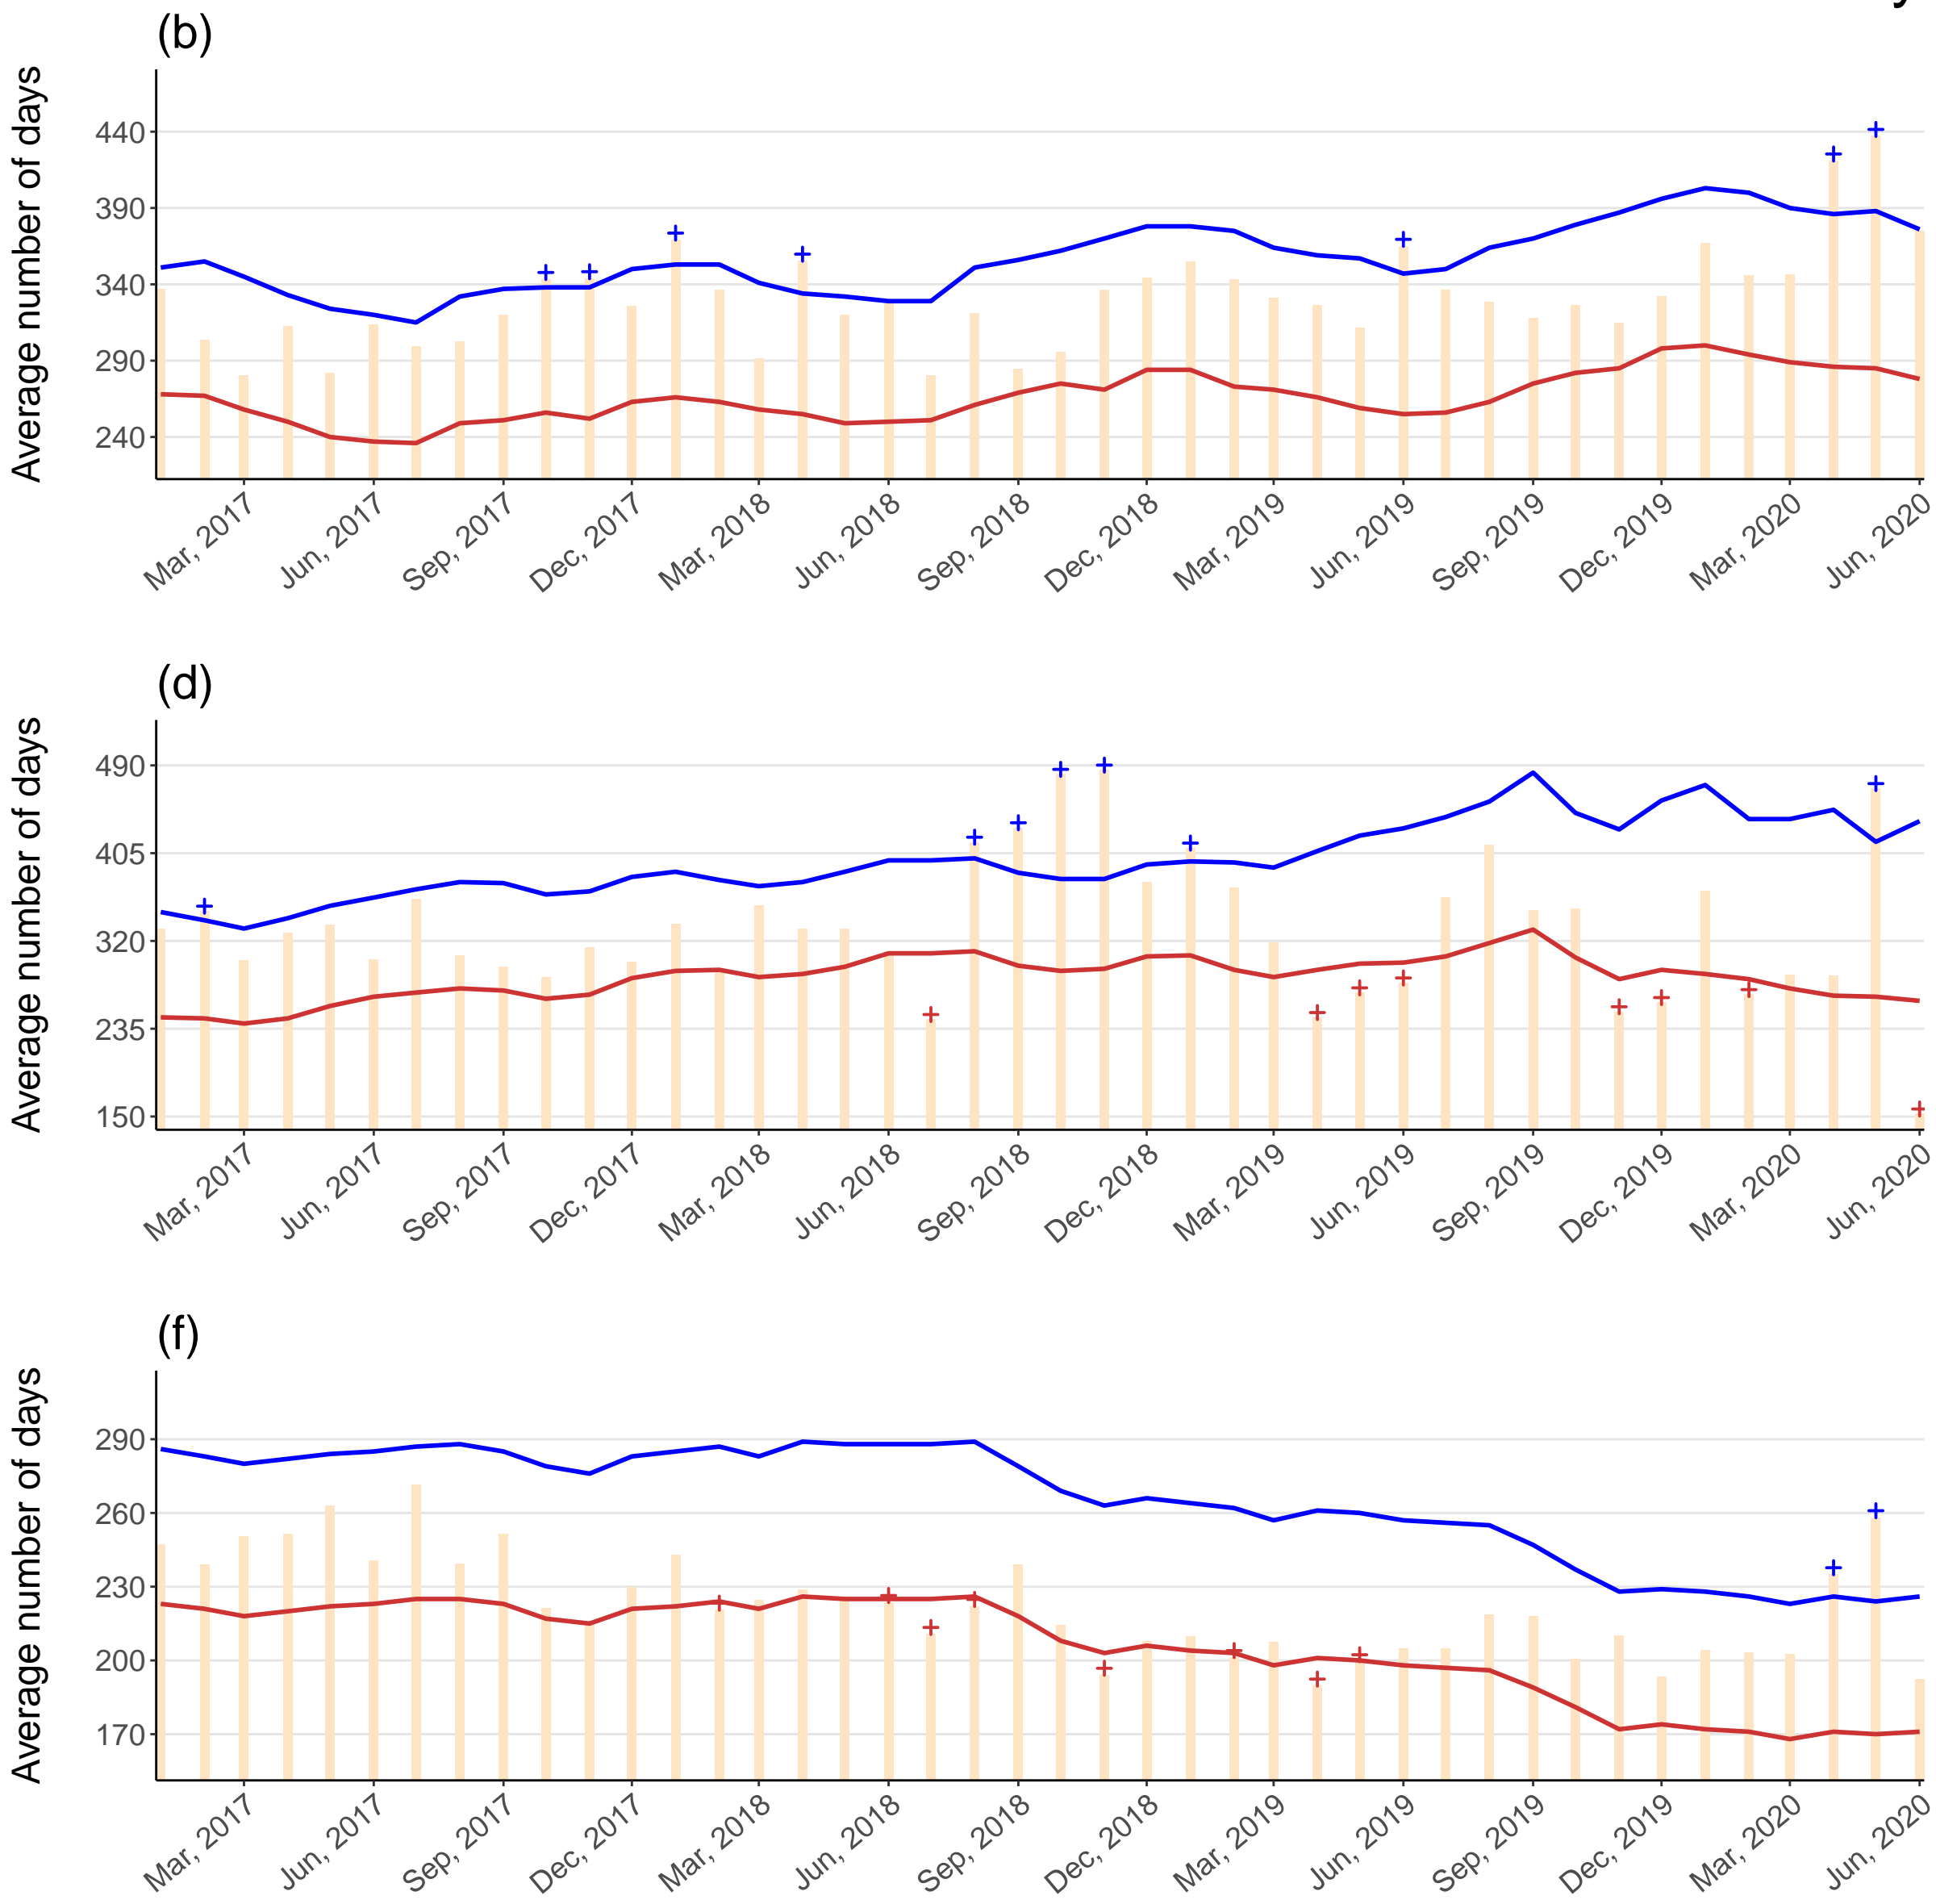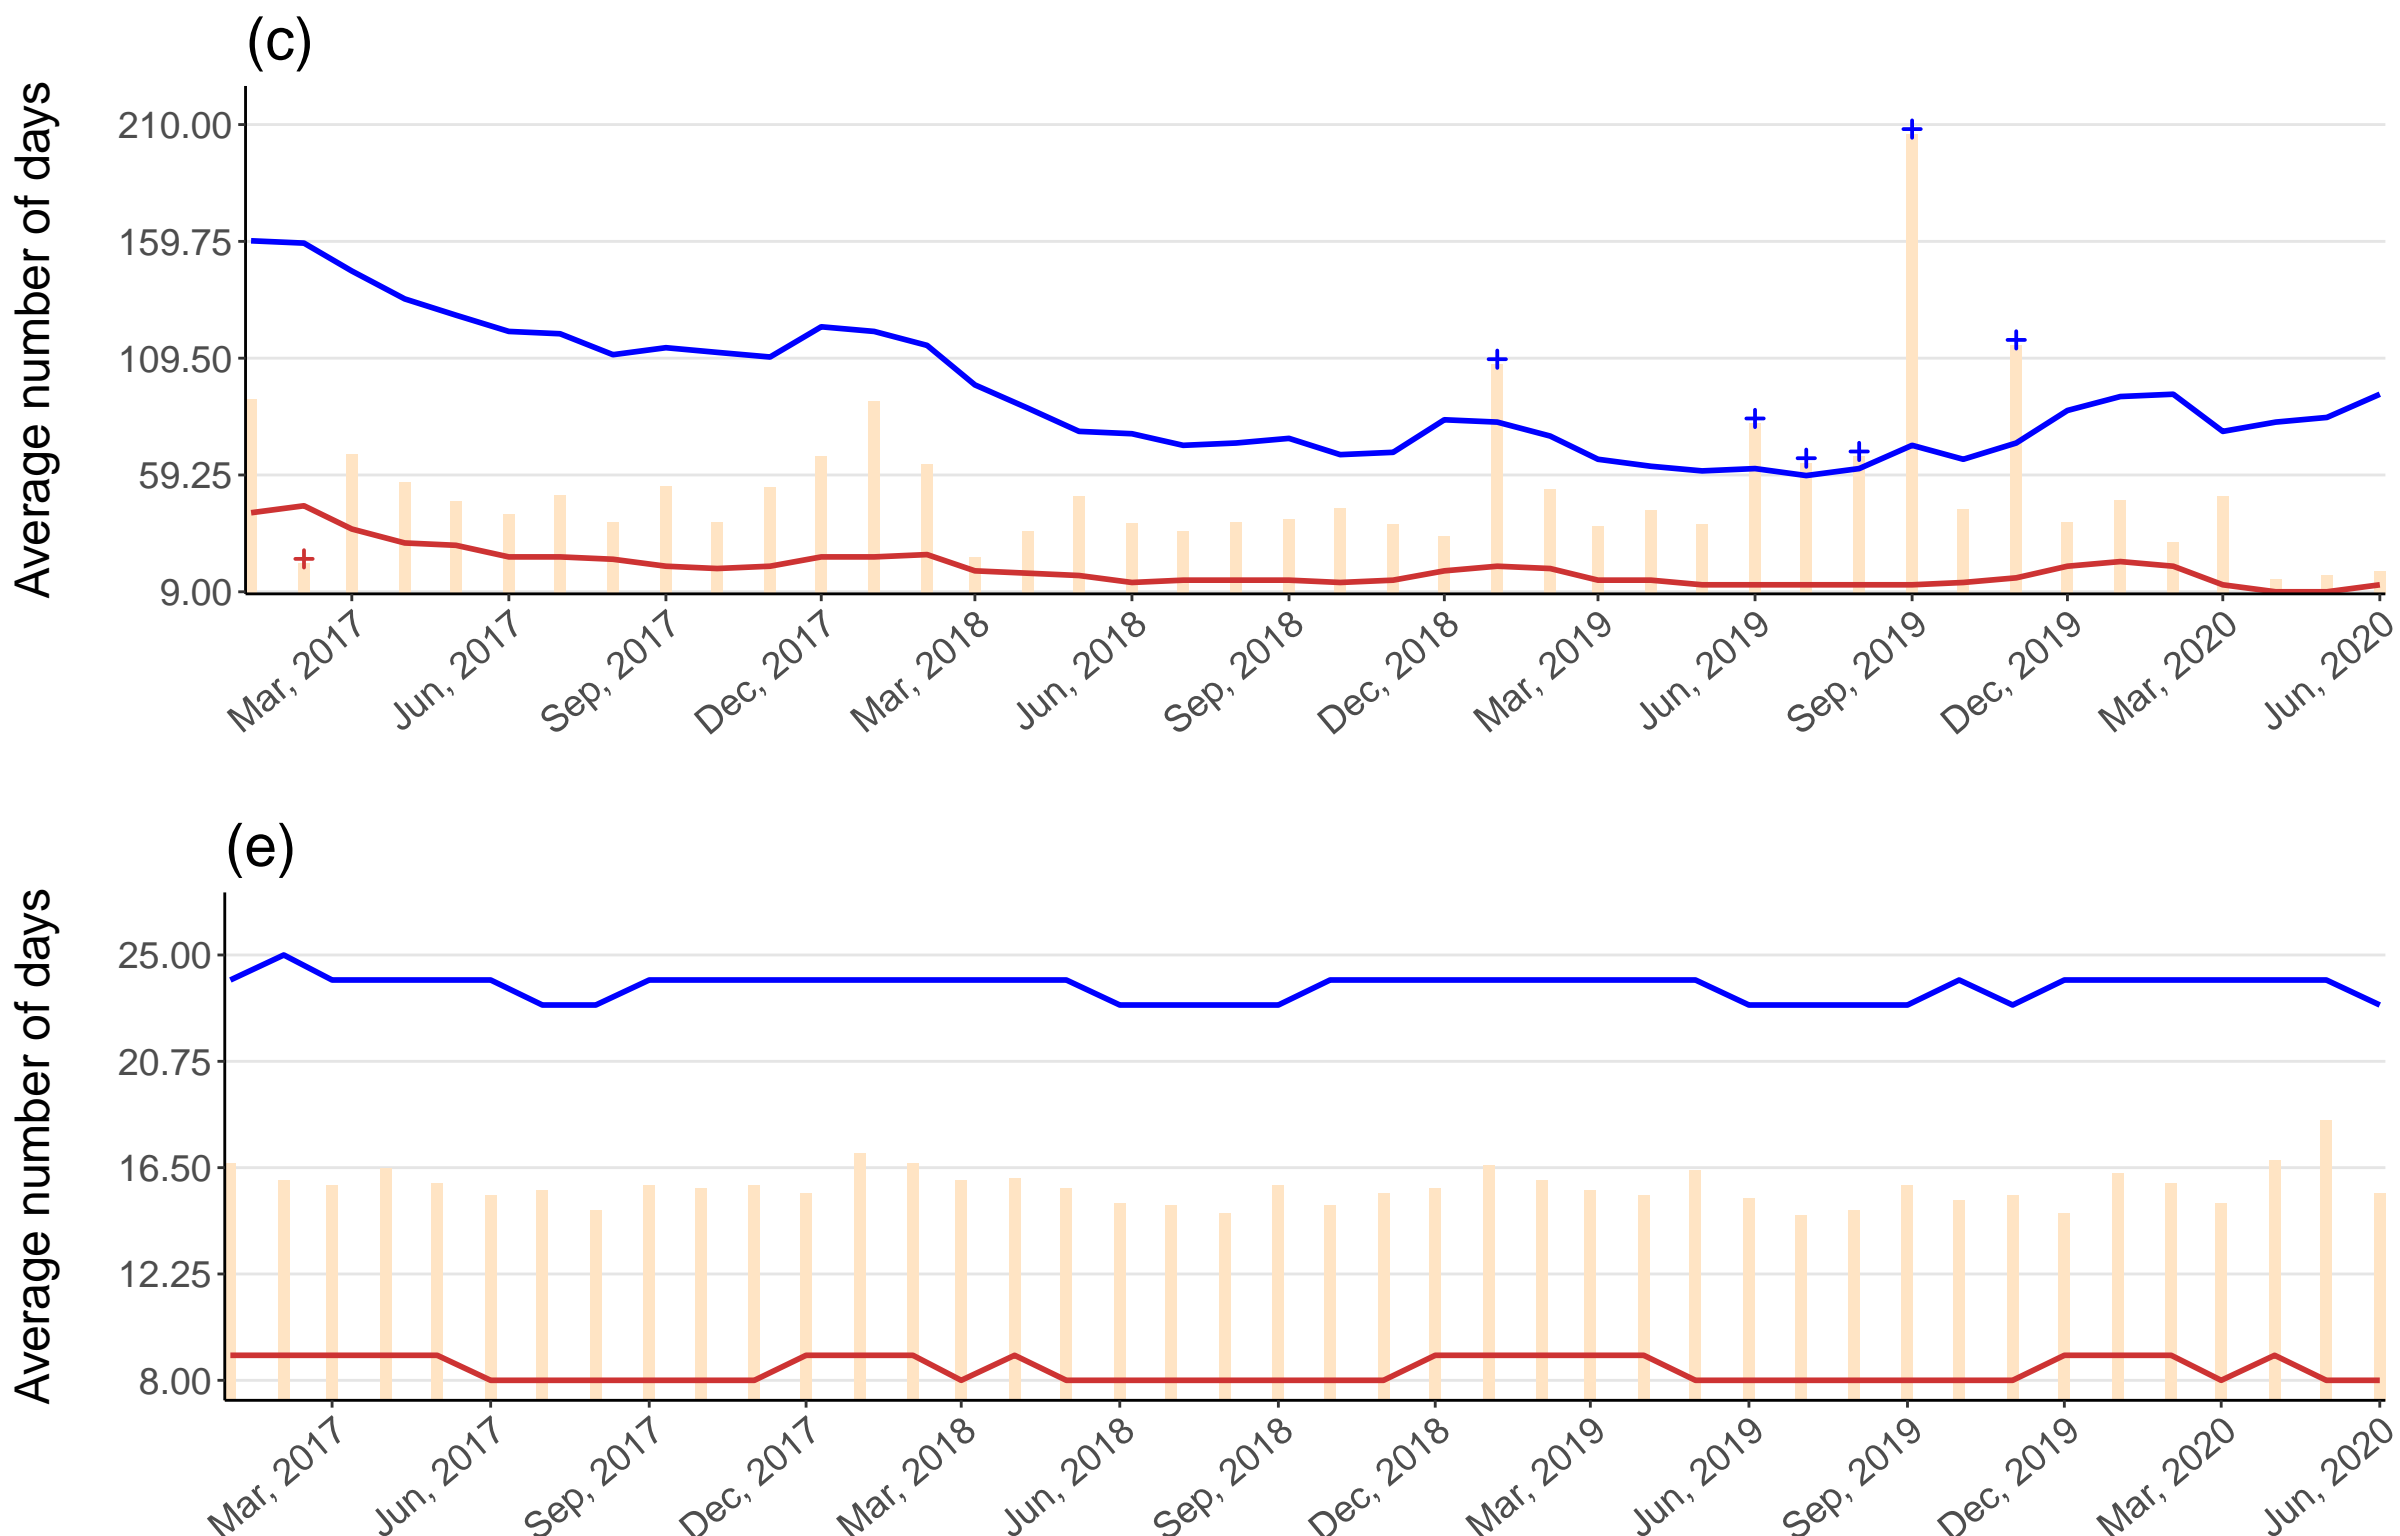

Ishikawa

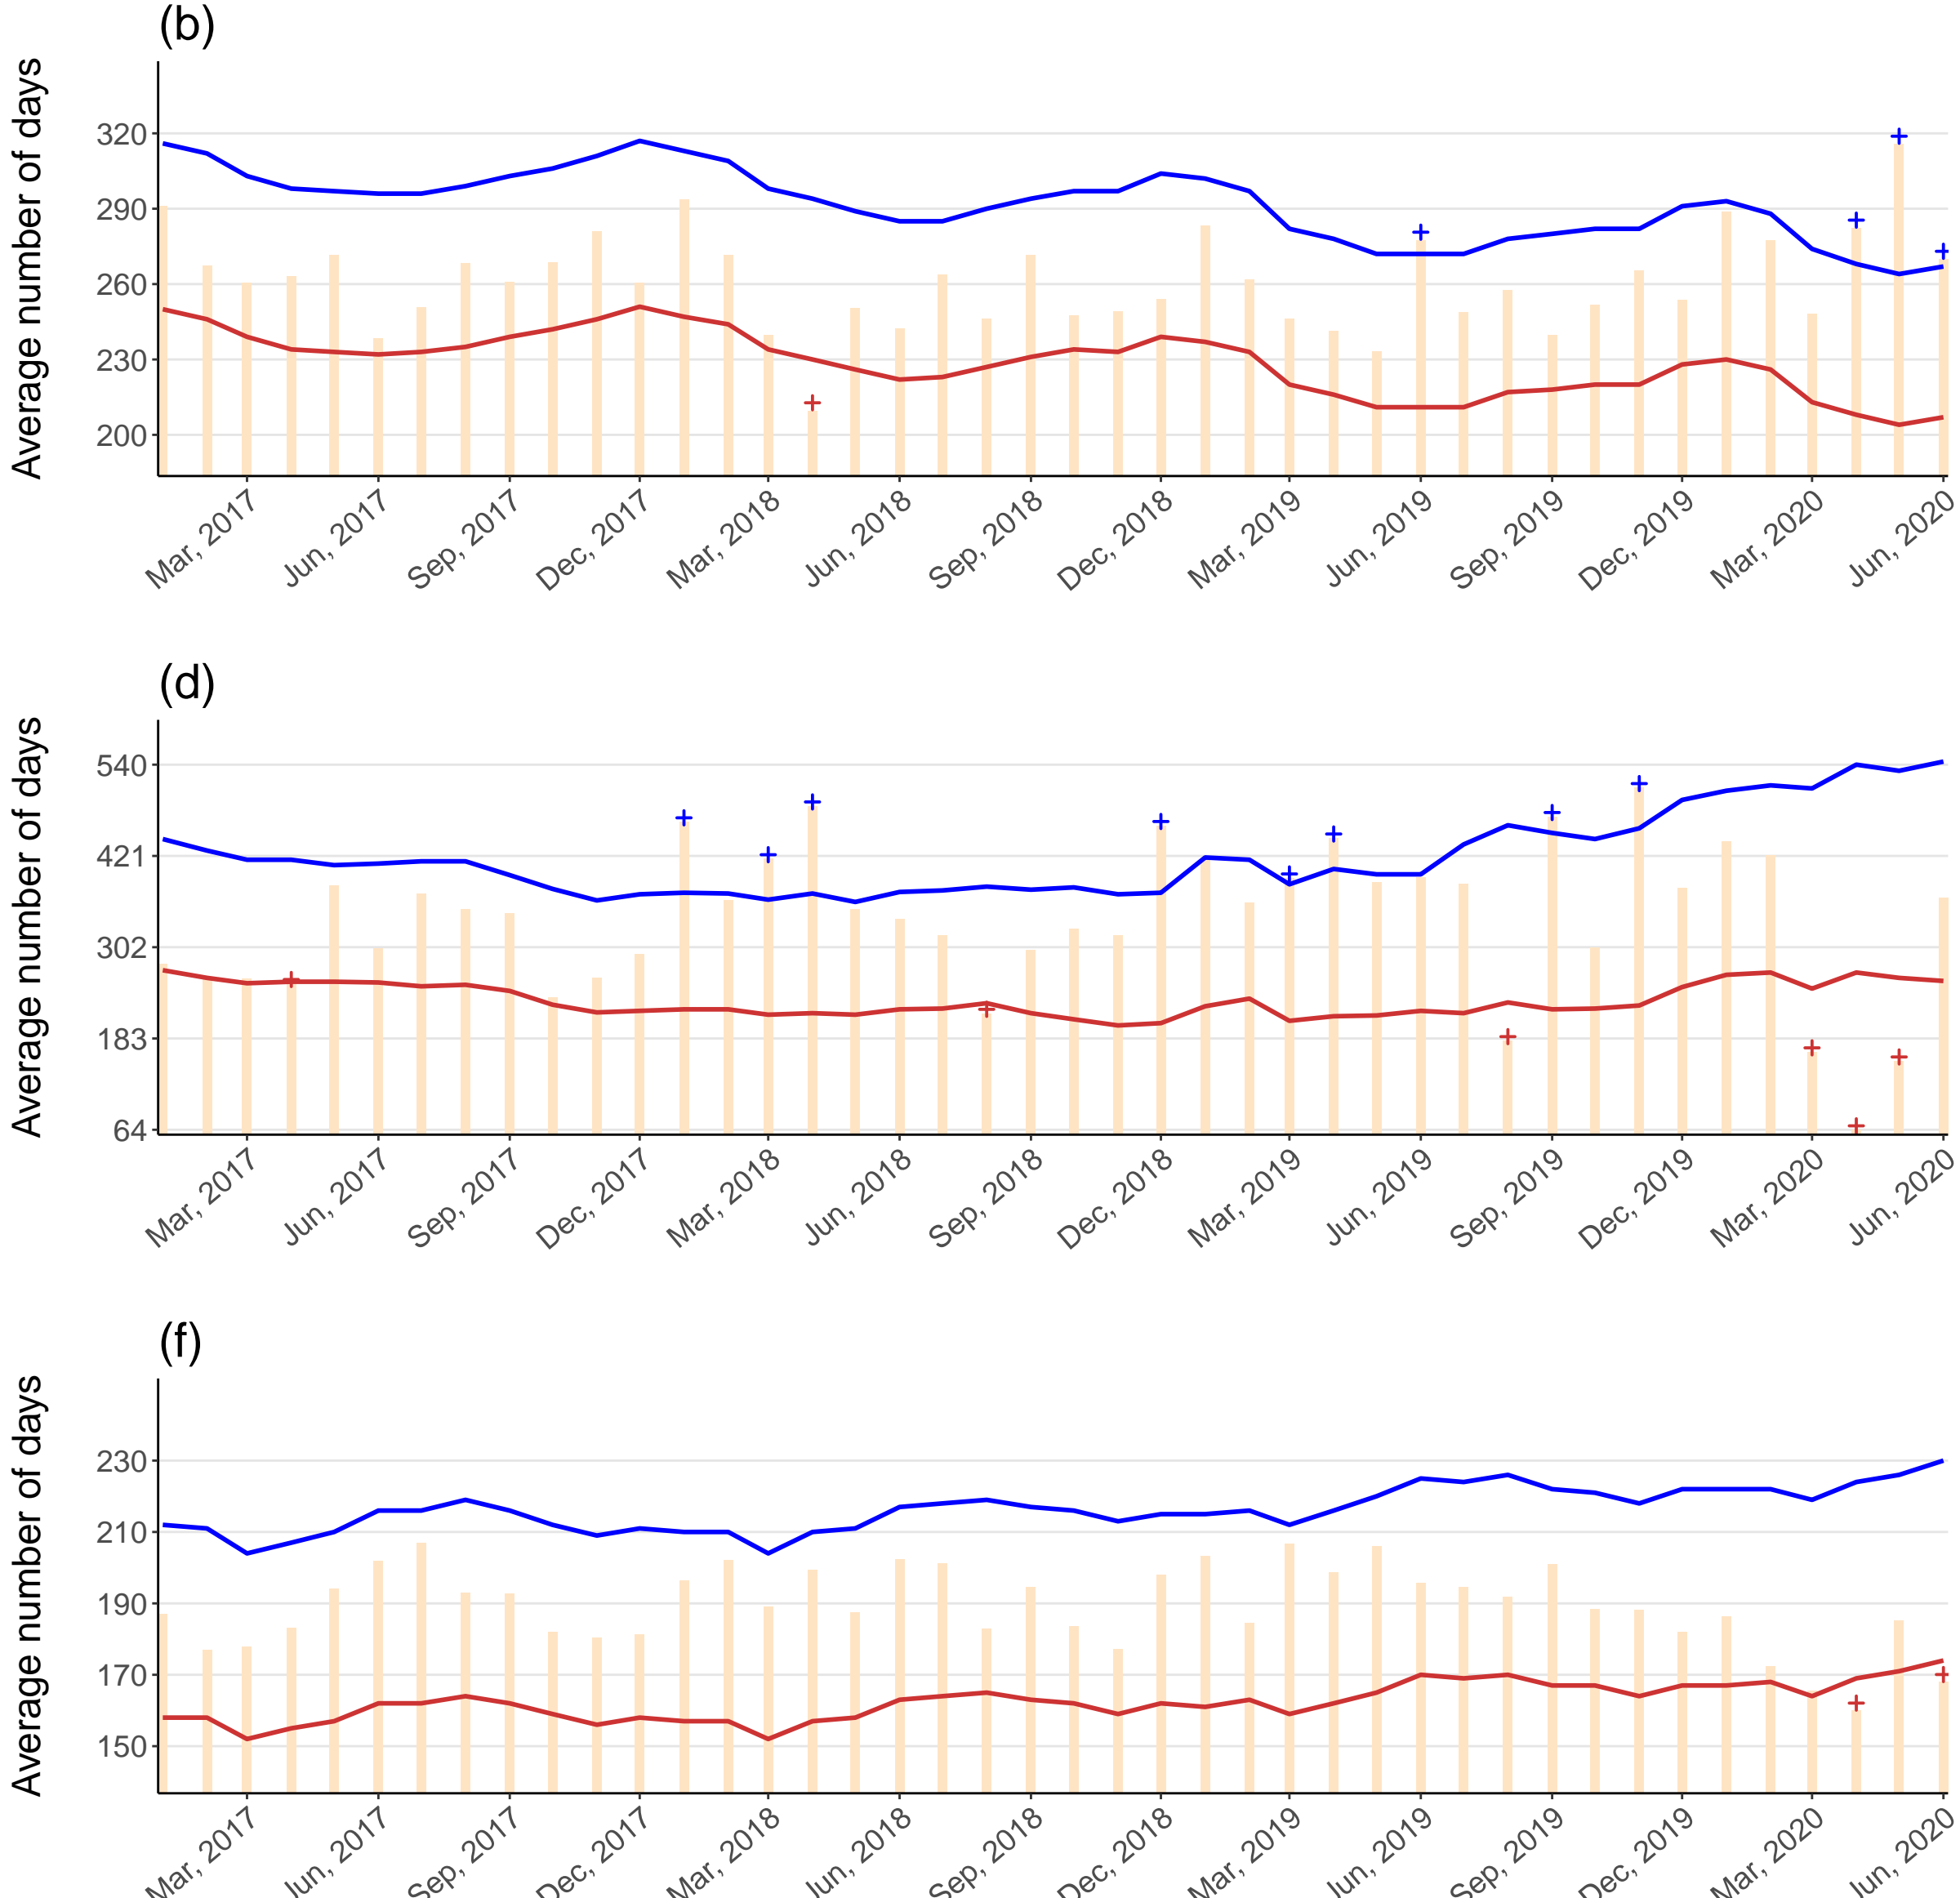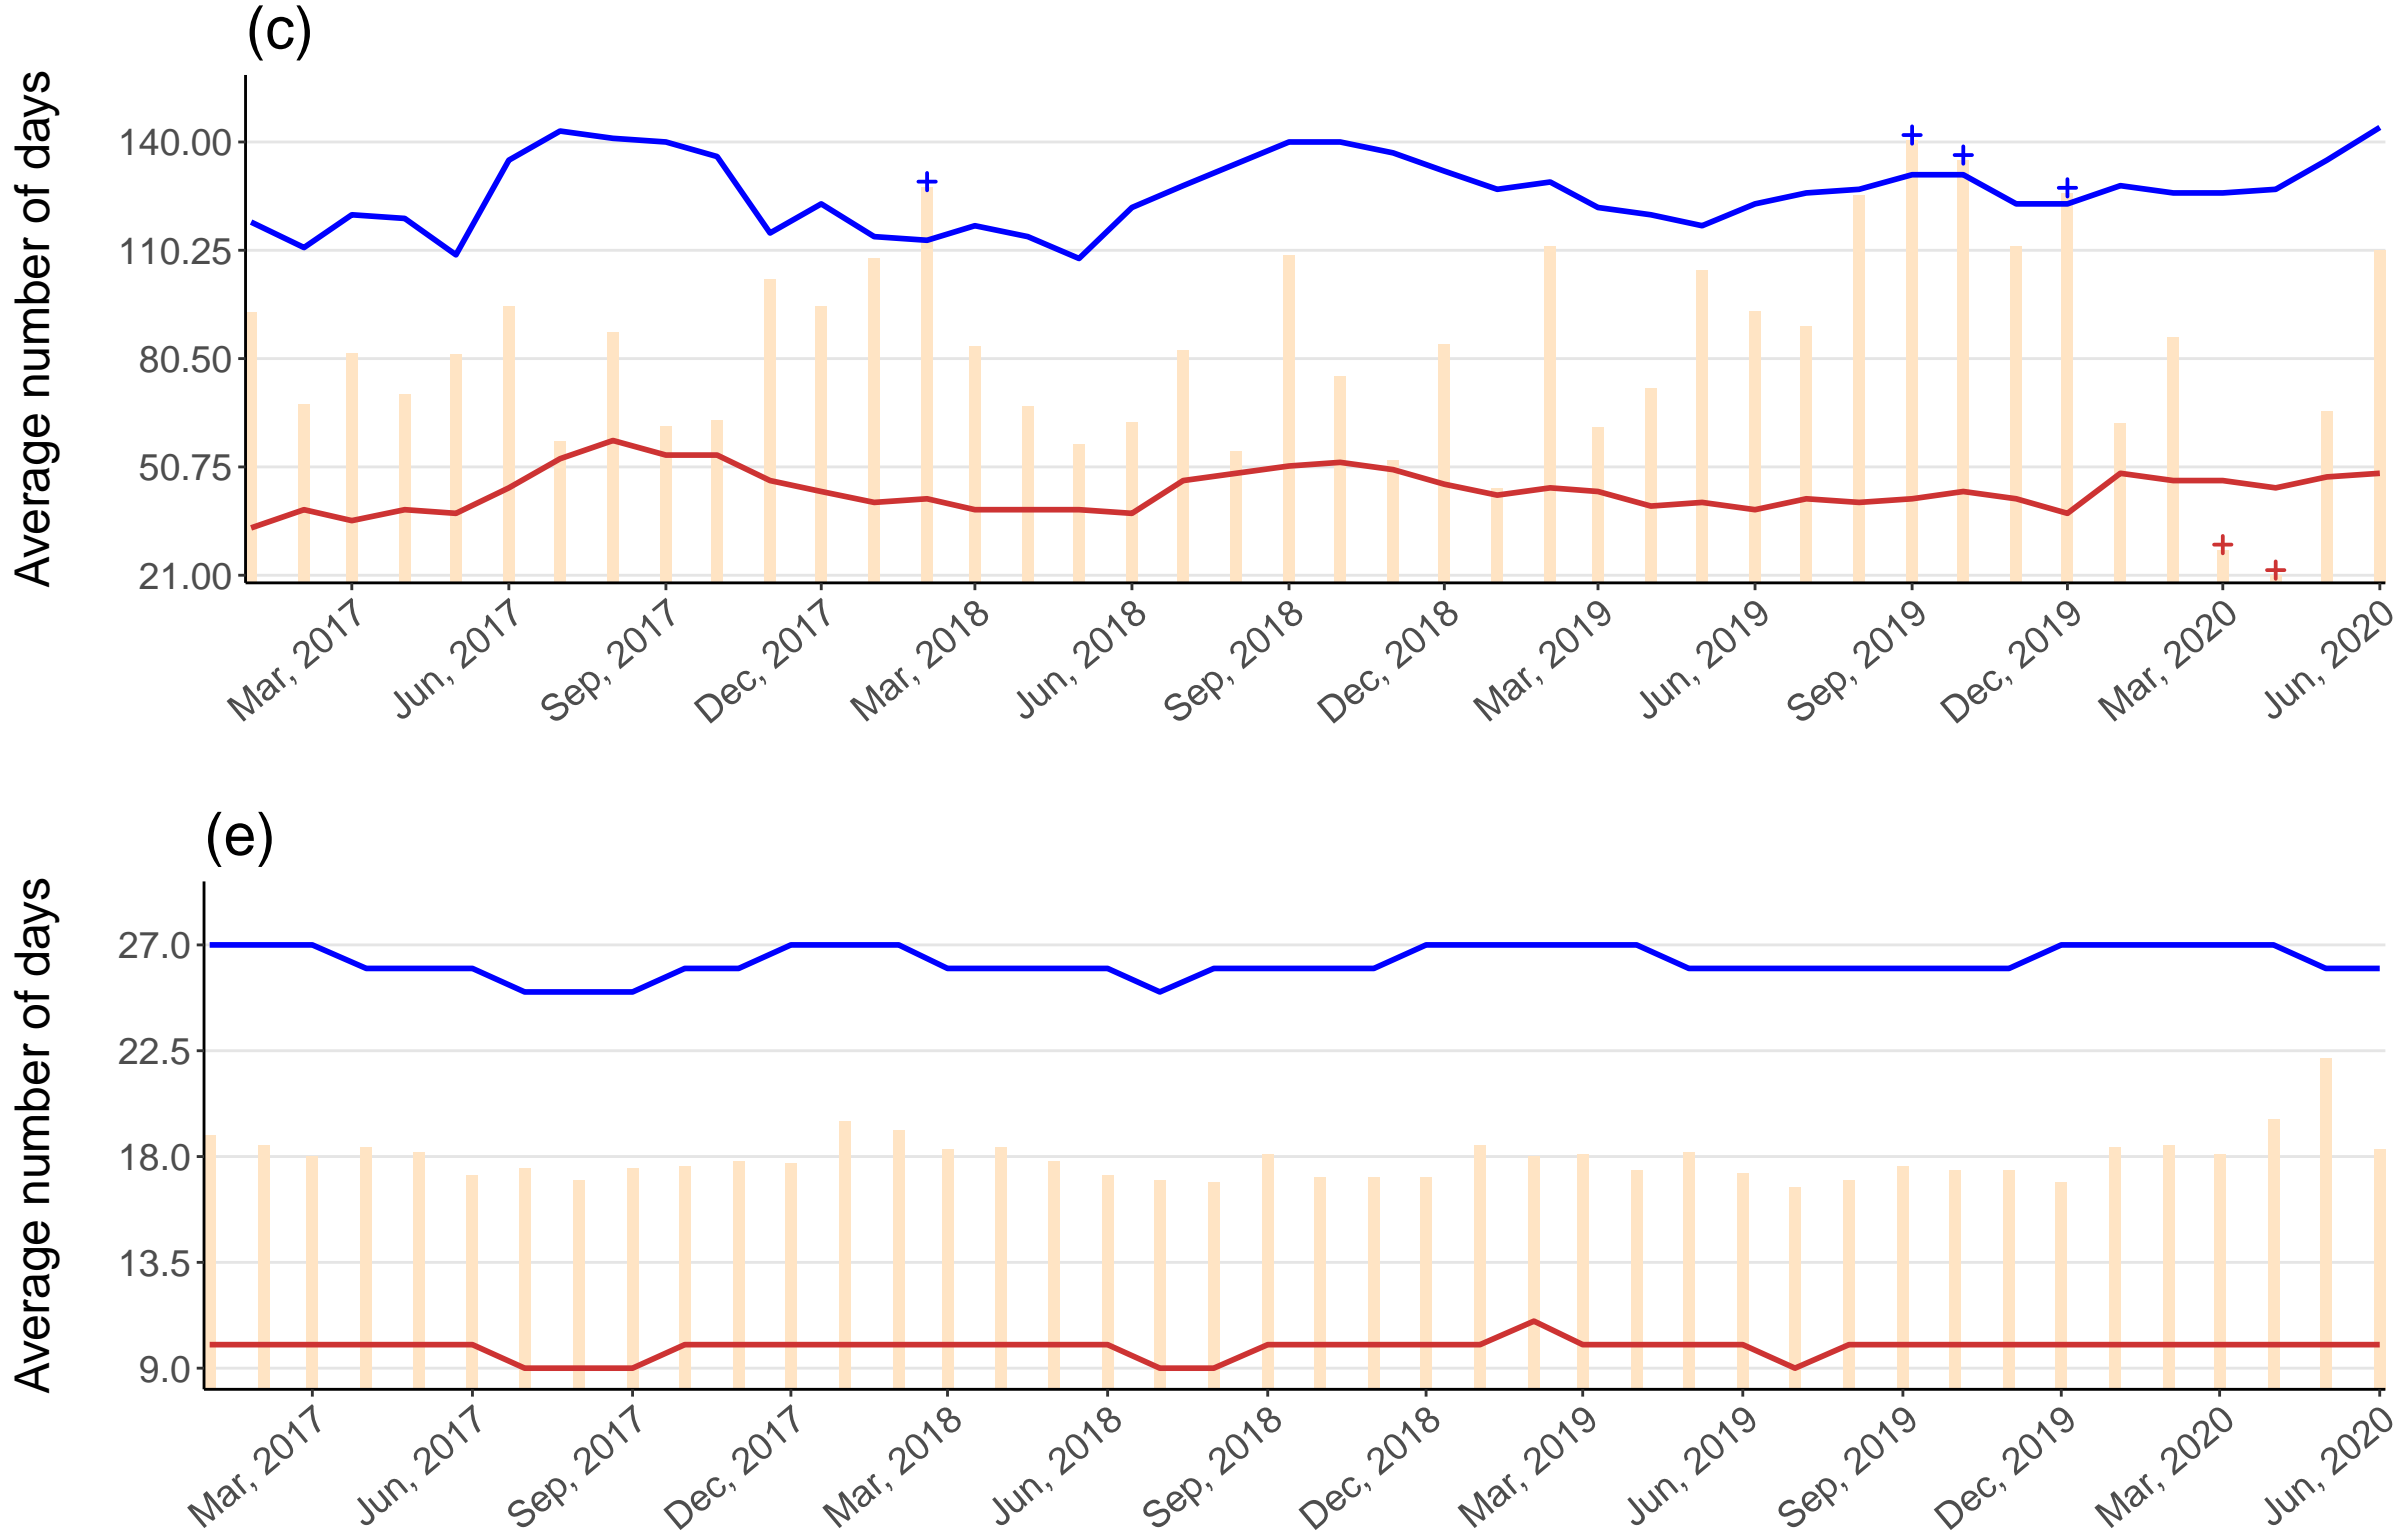

Fukui

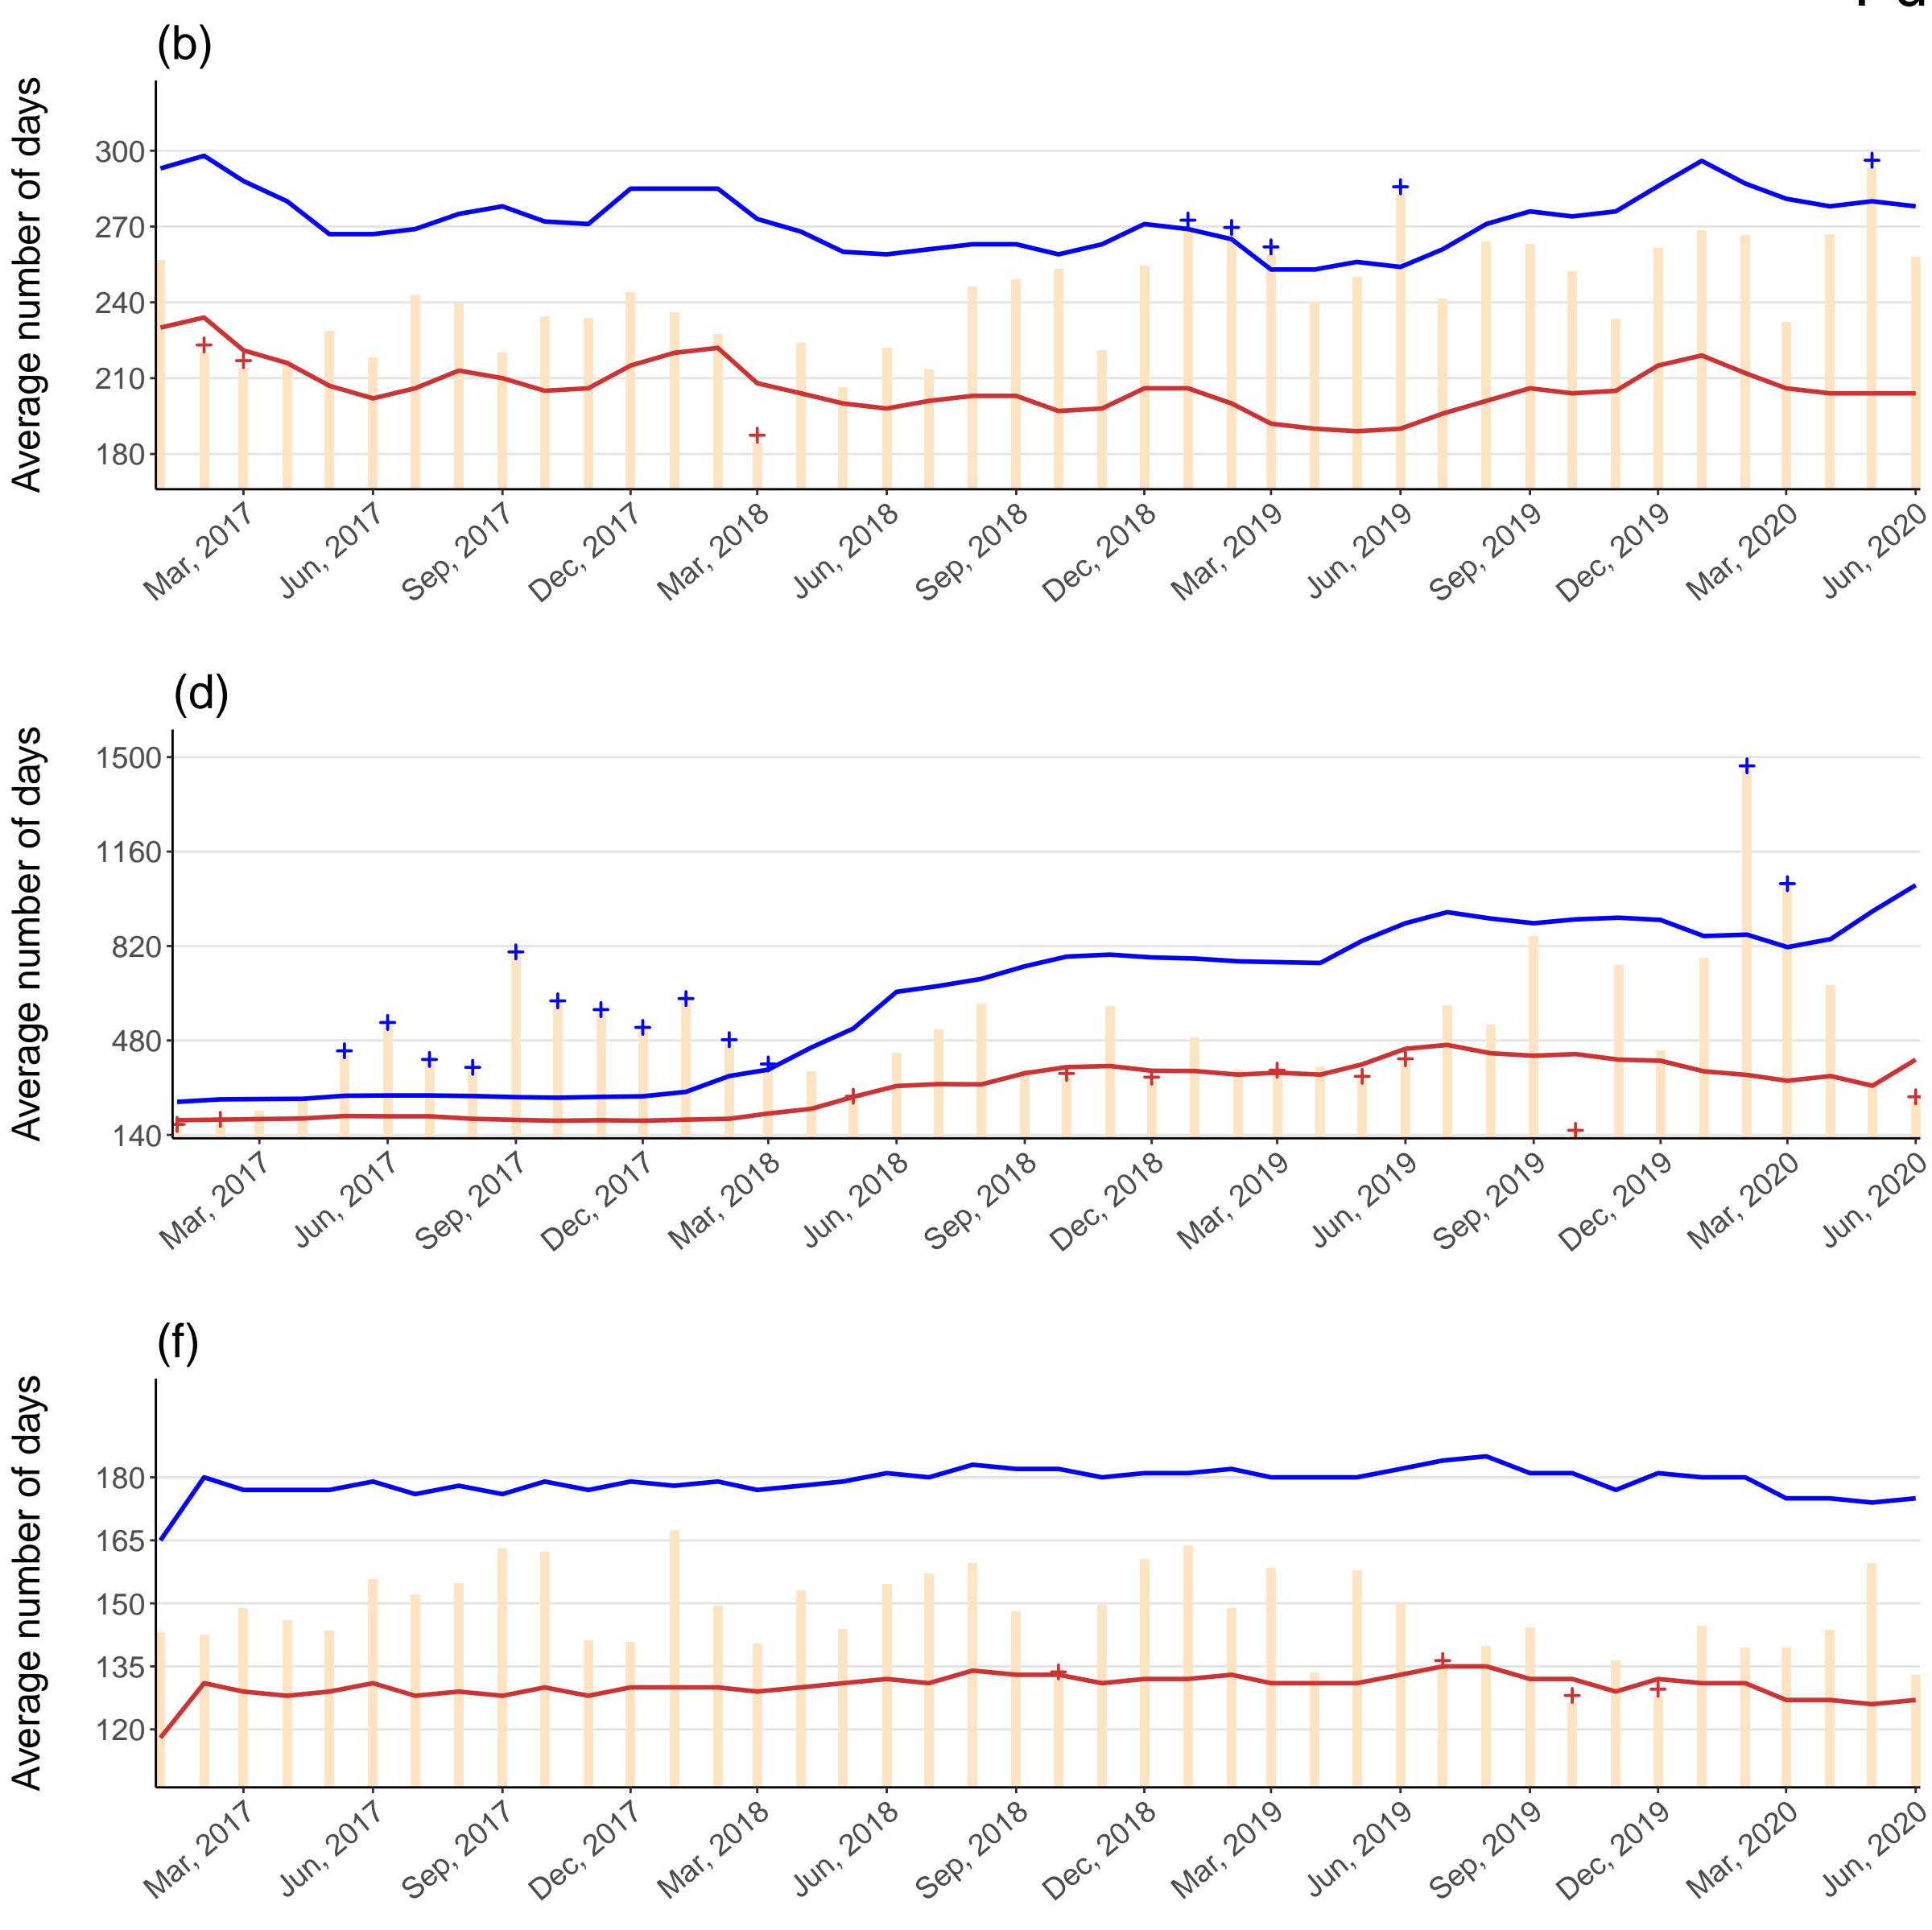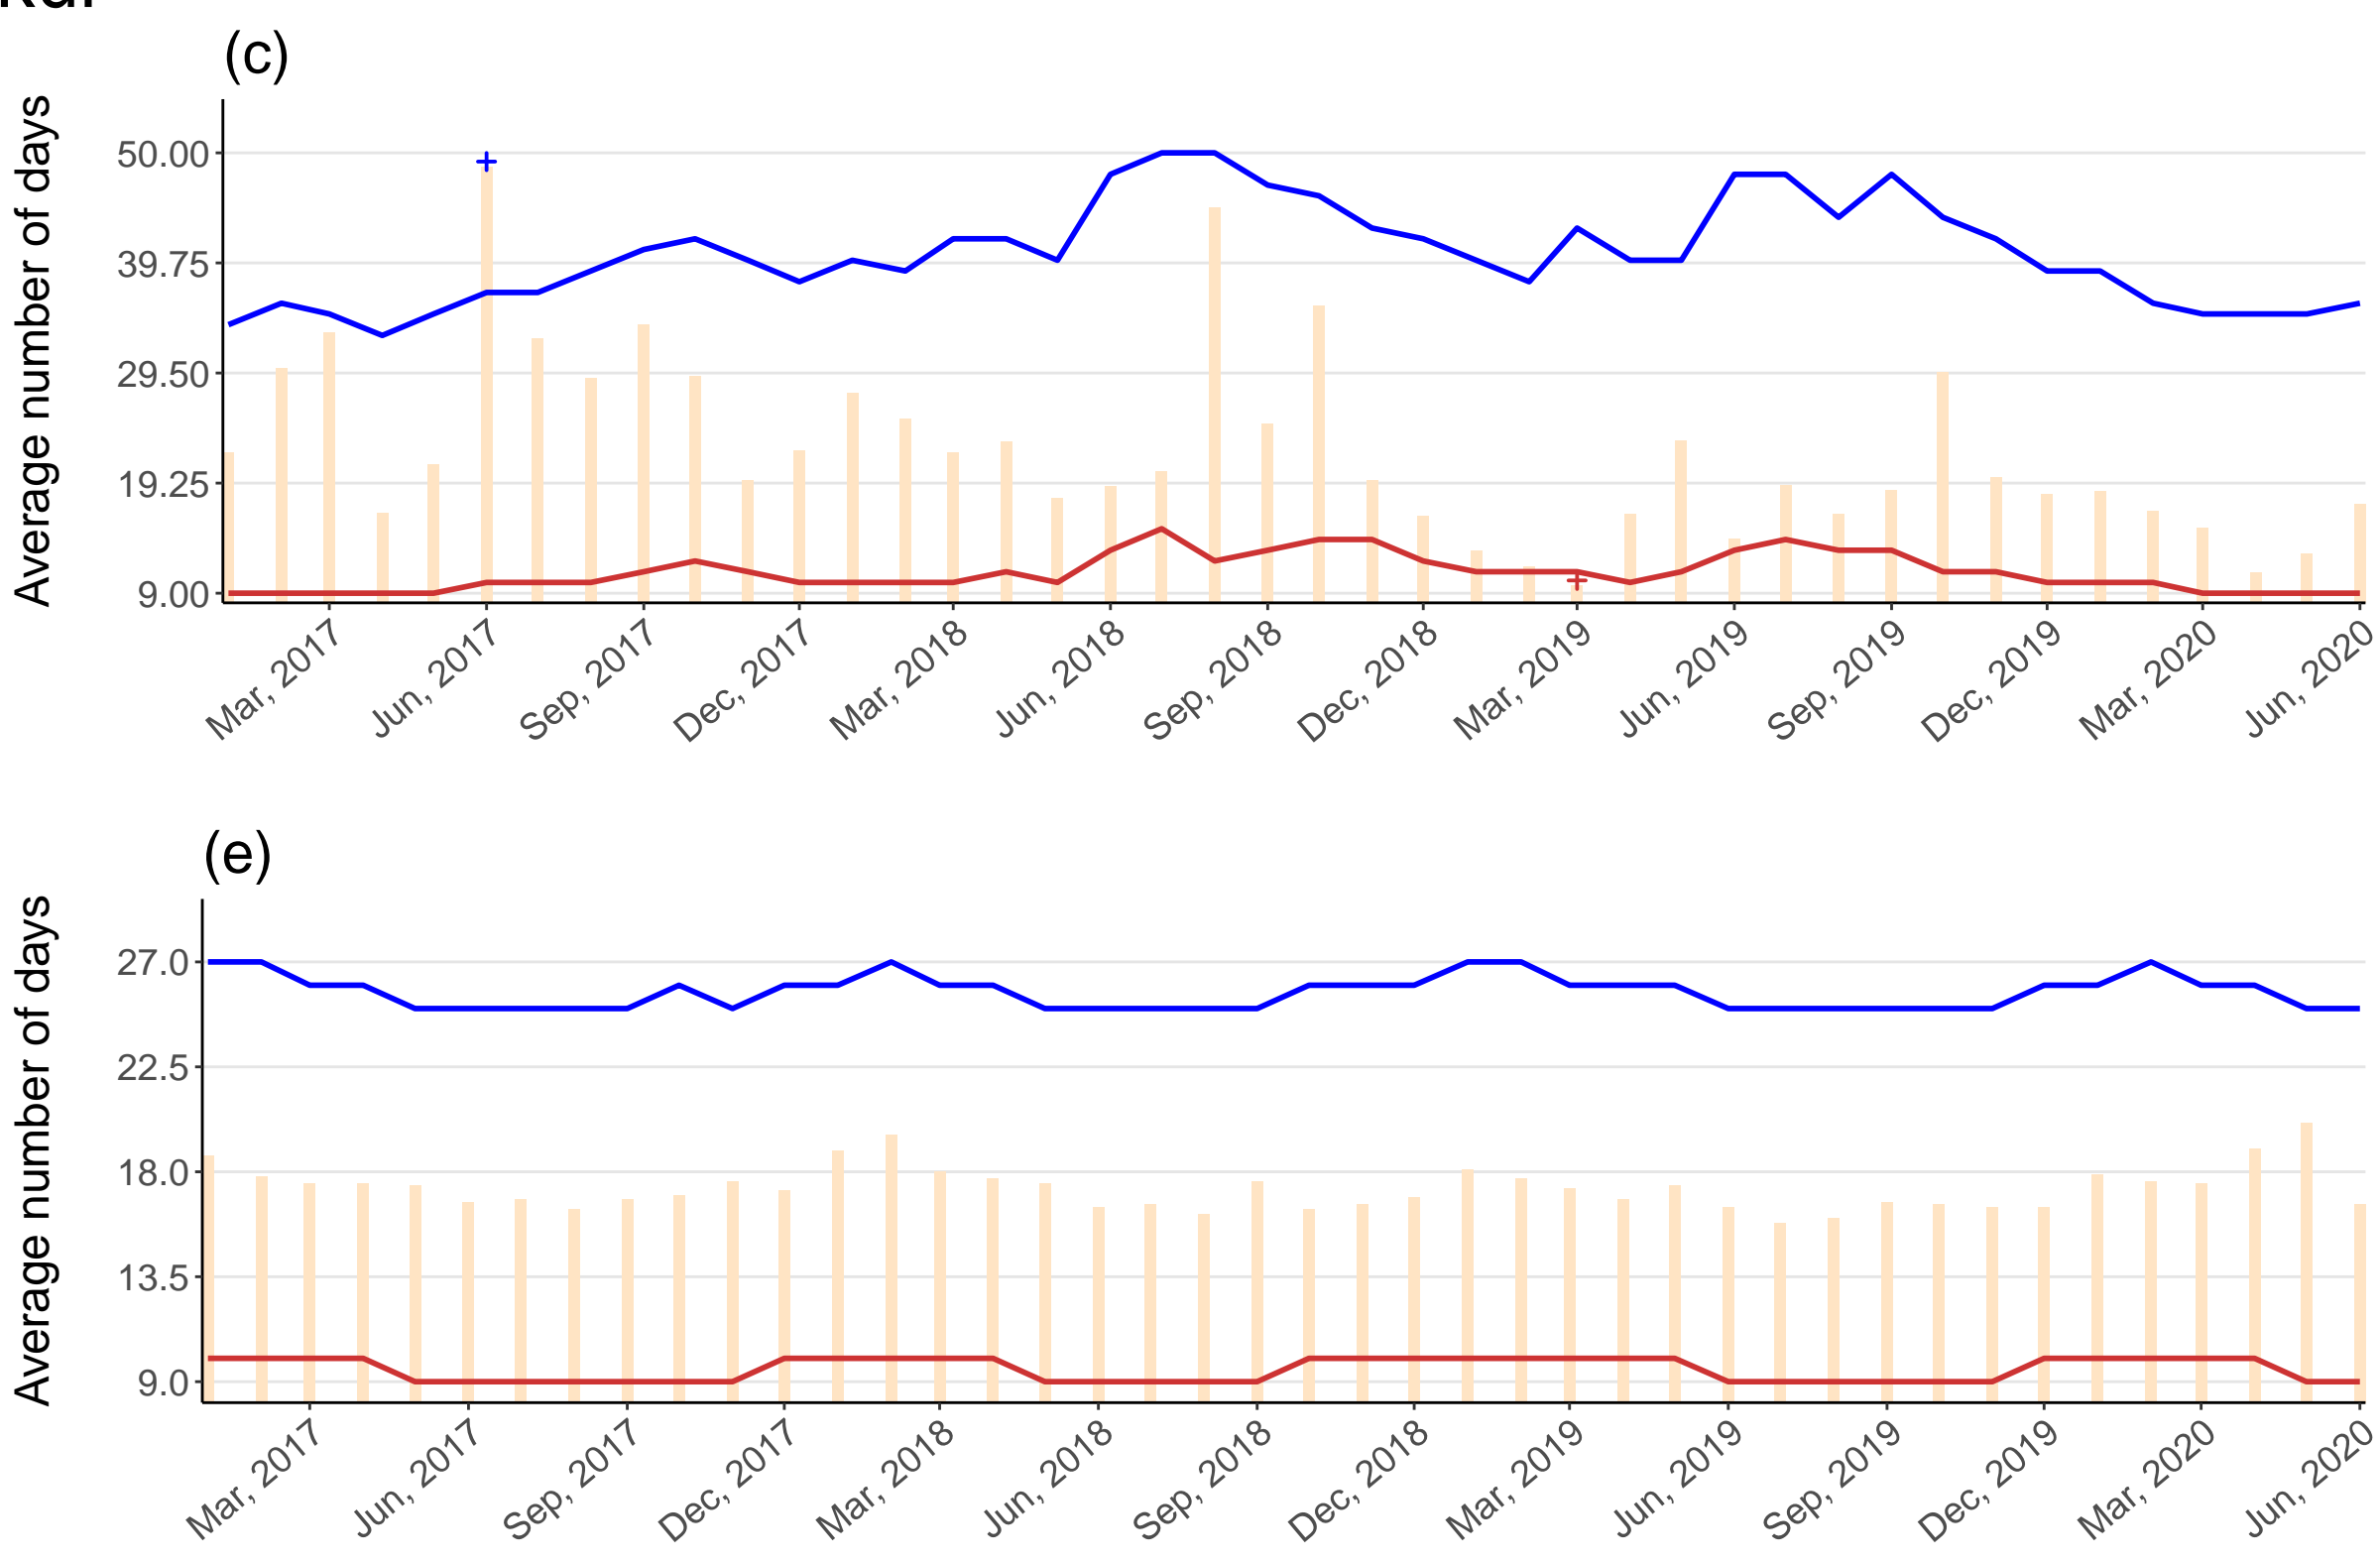

Yamanashi

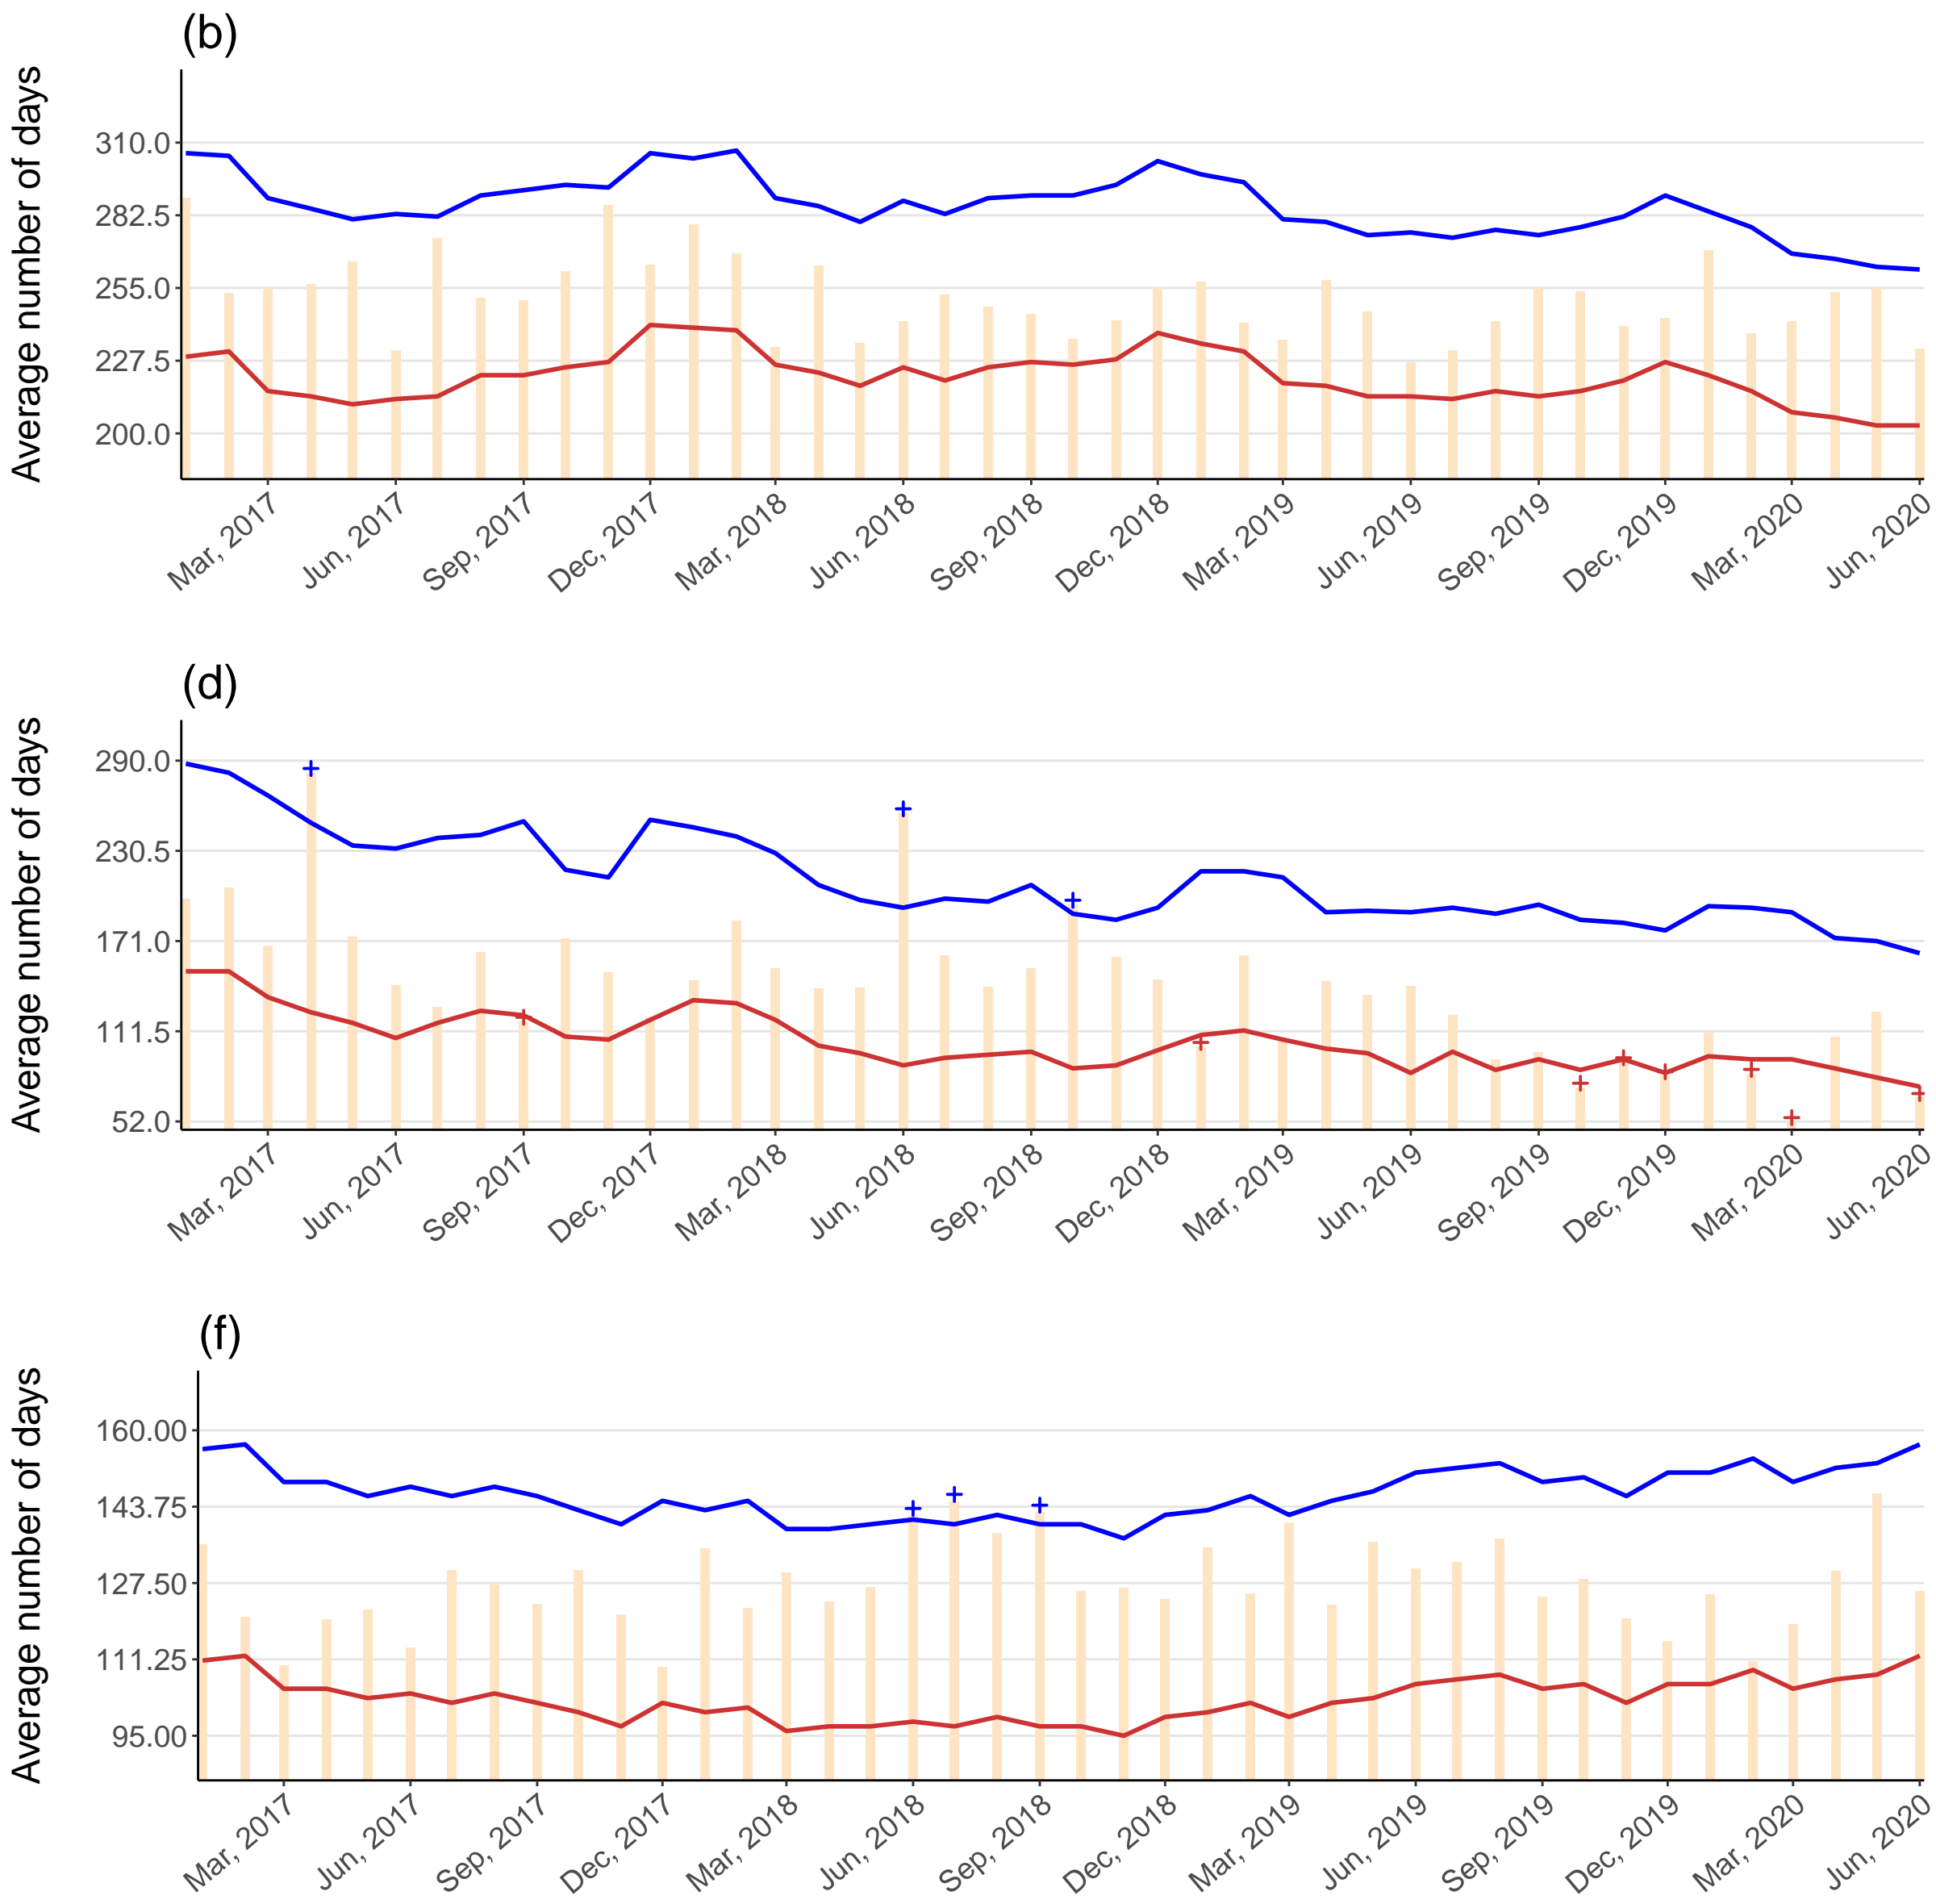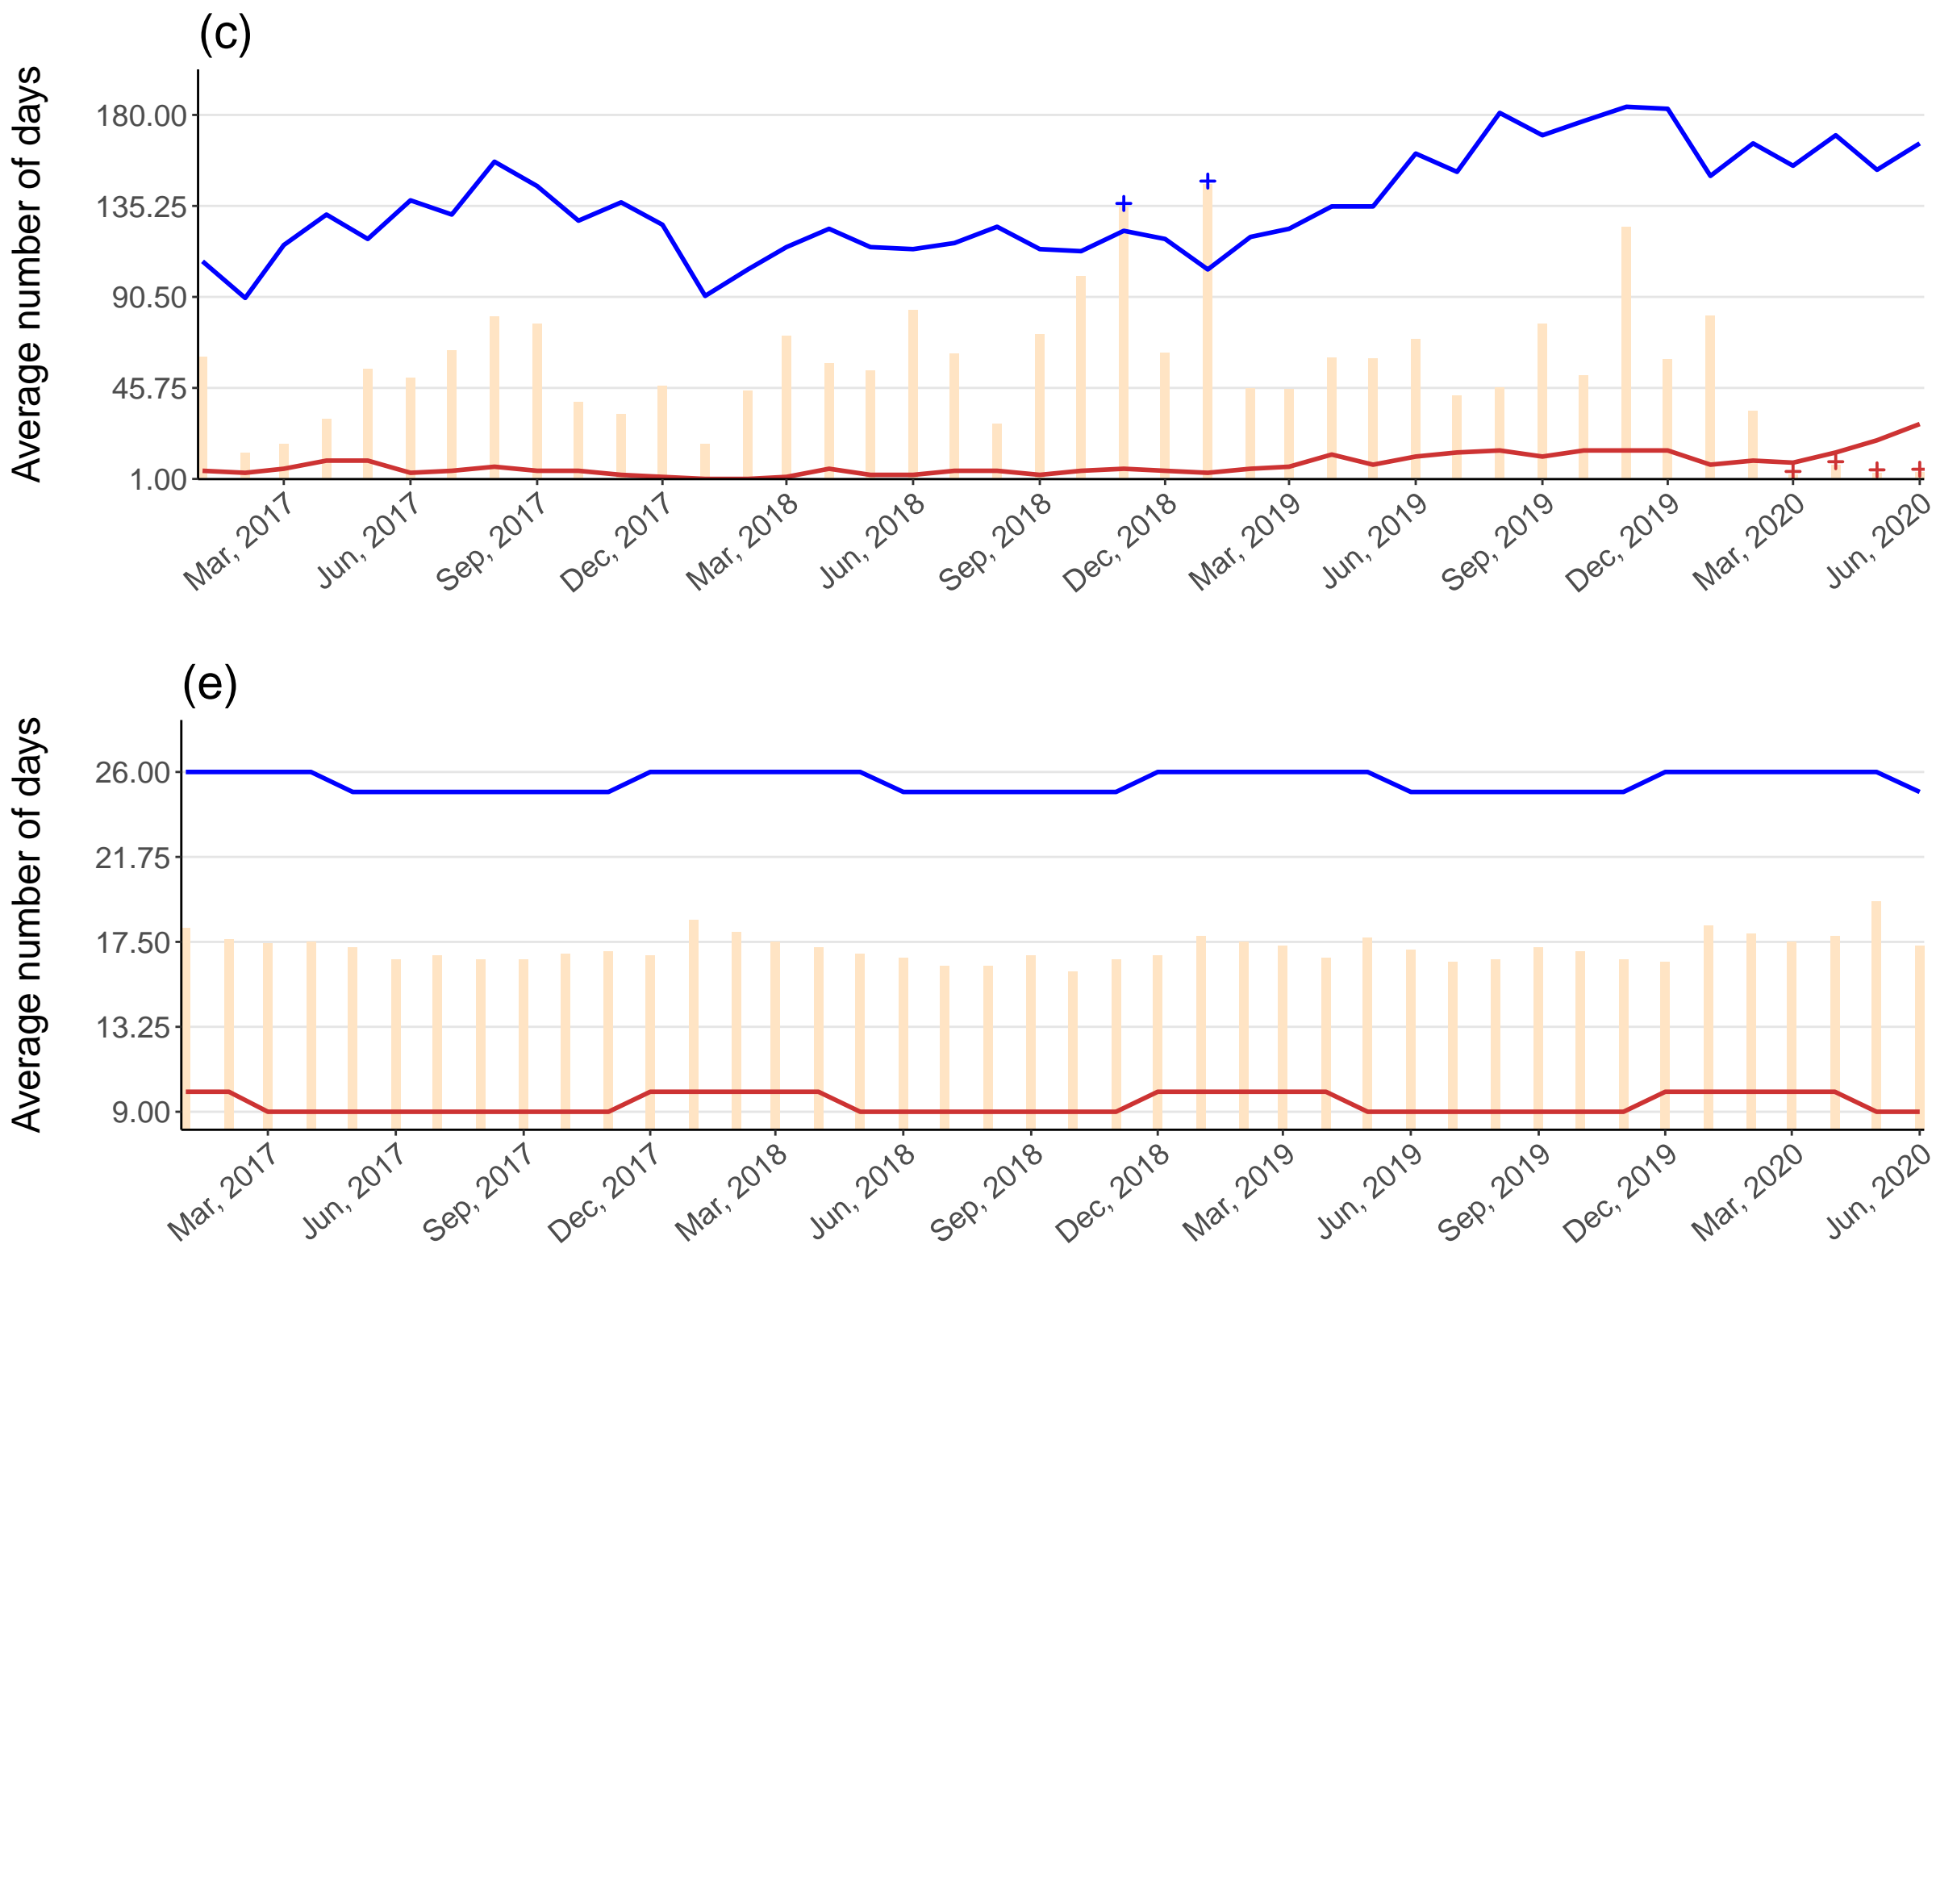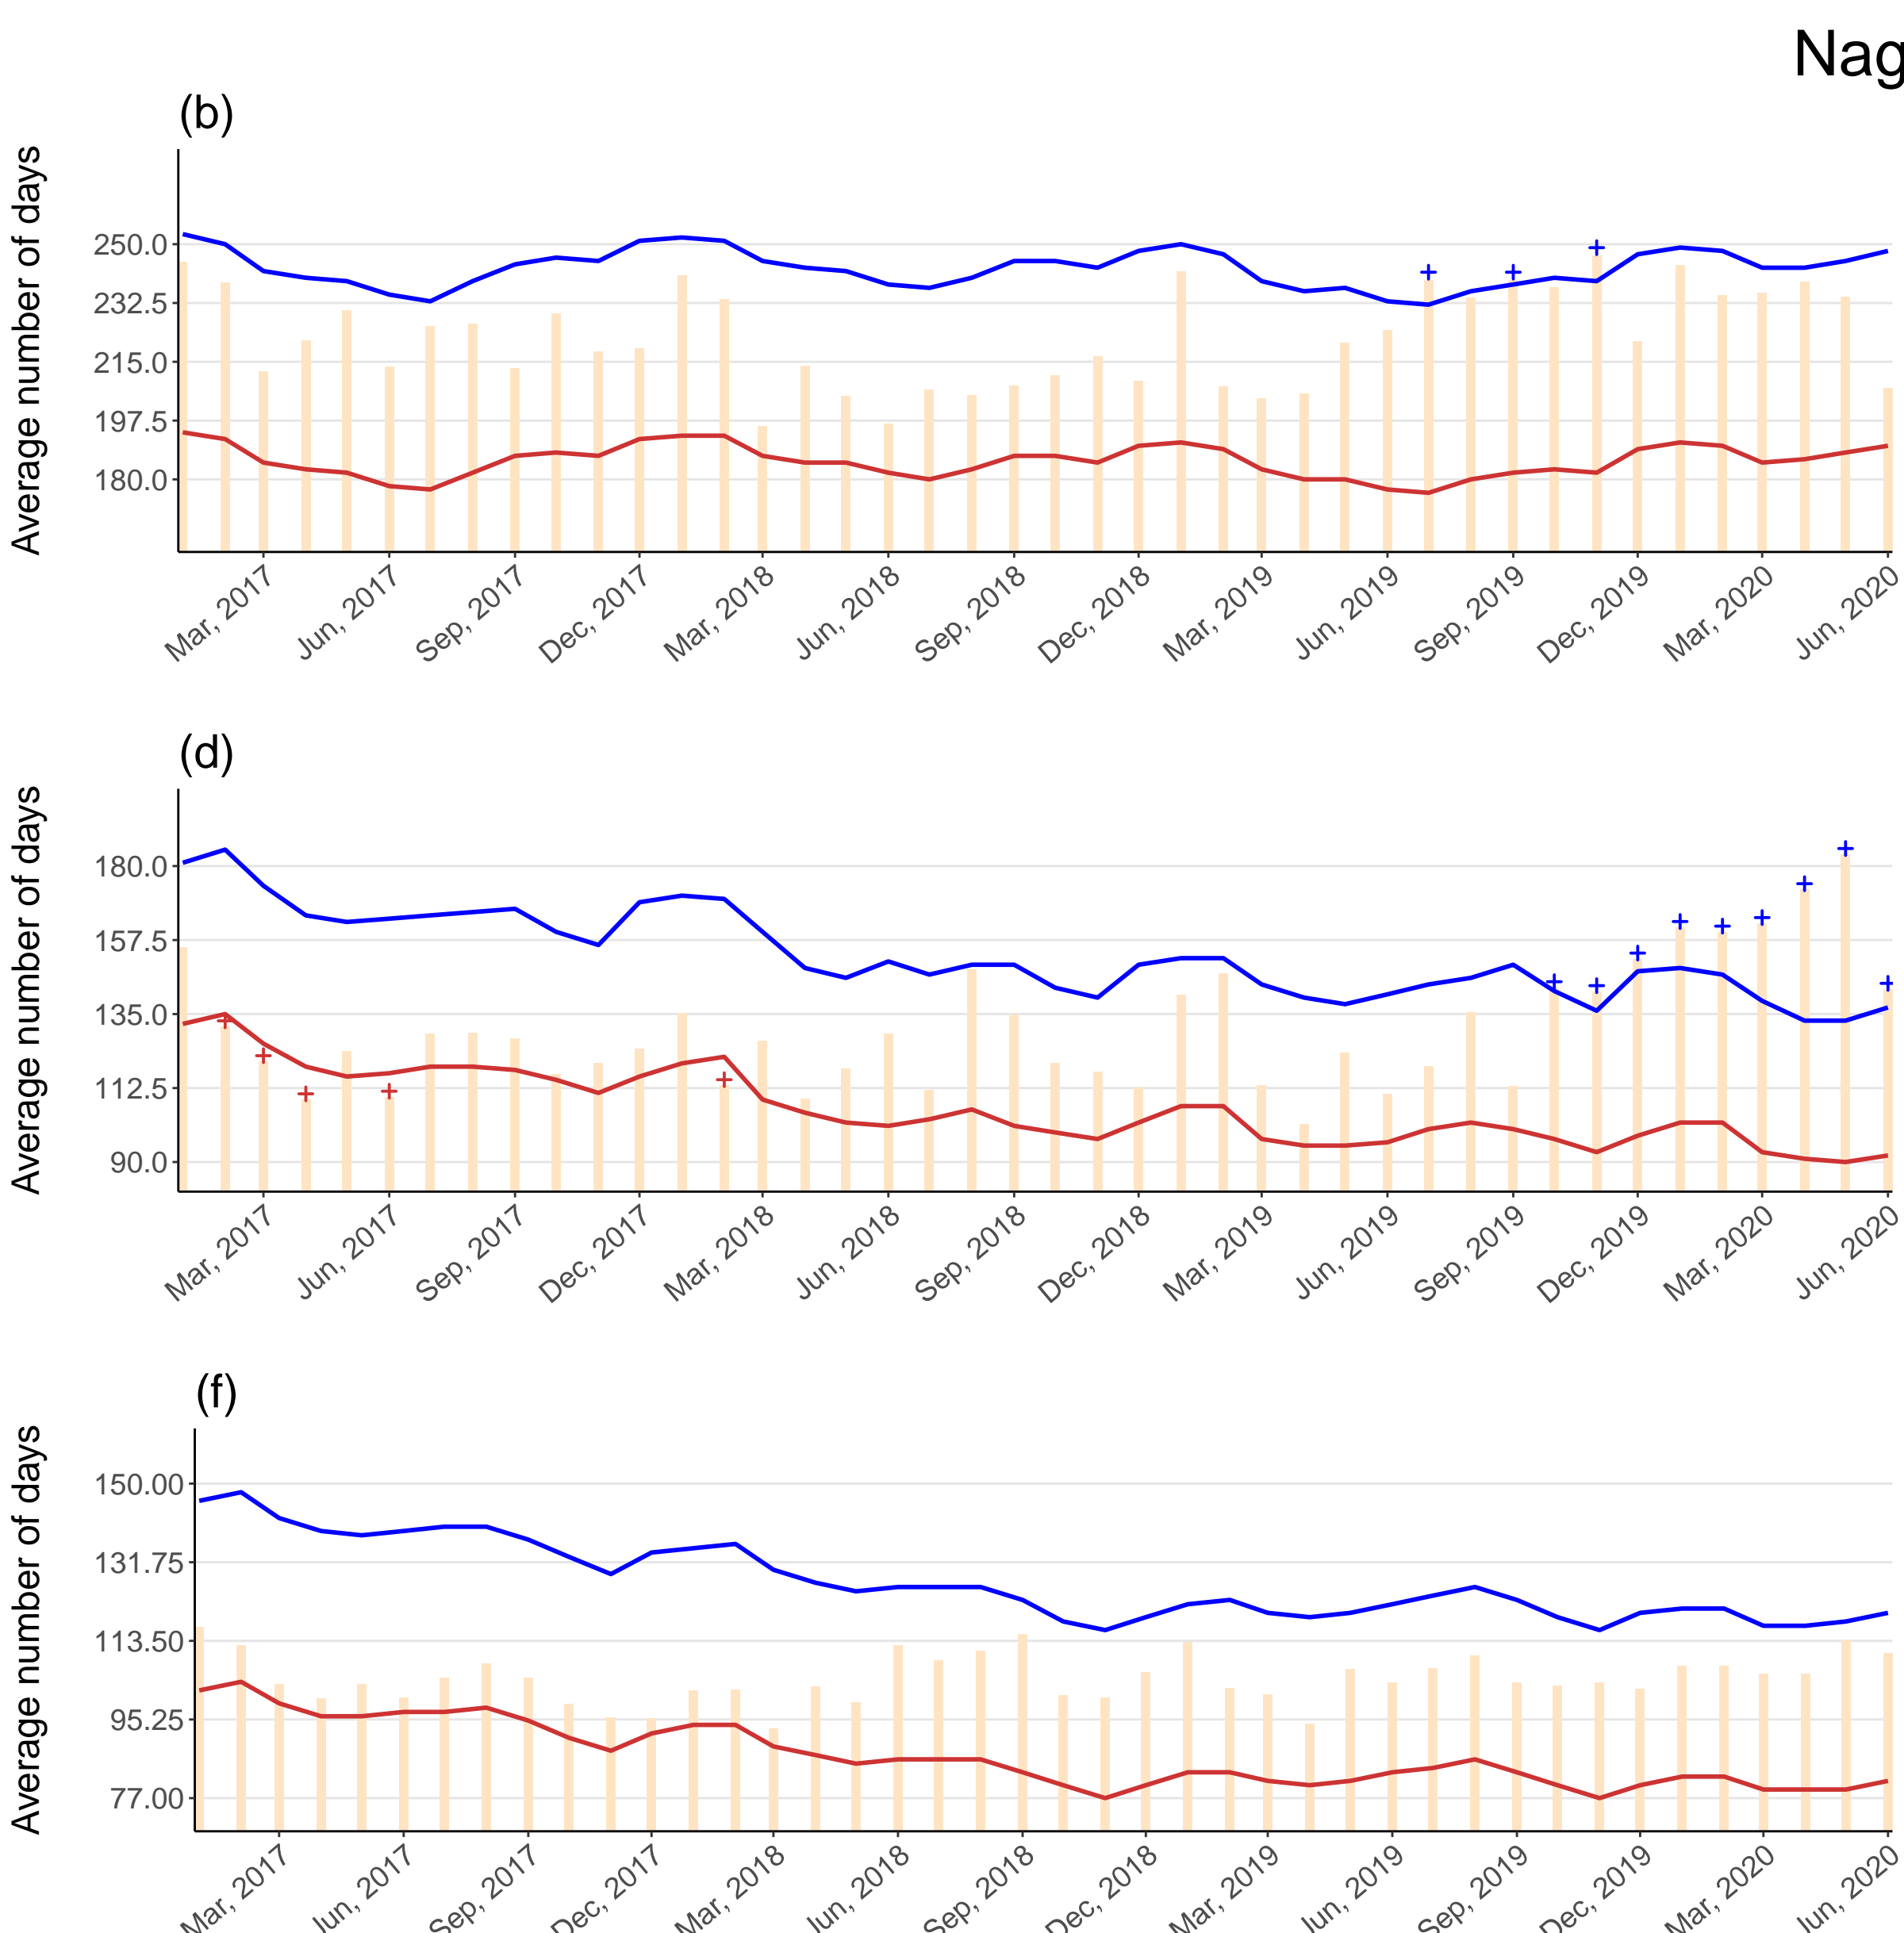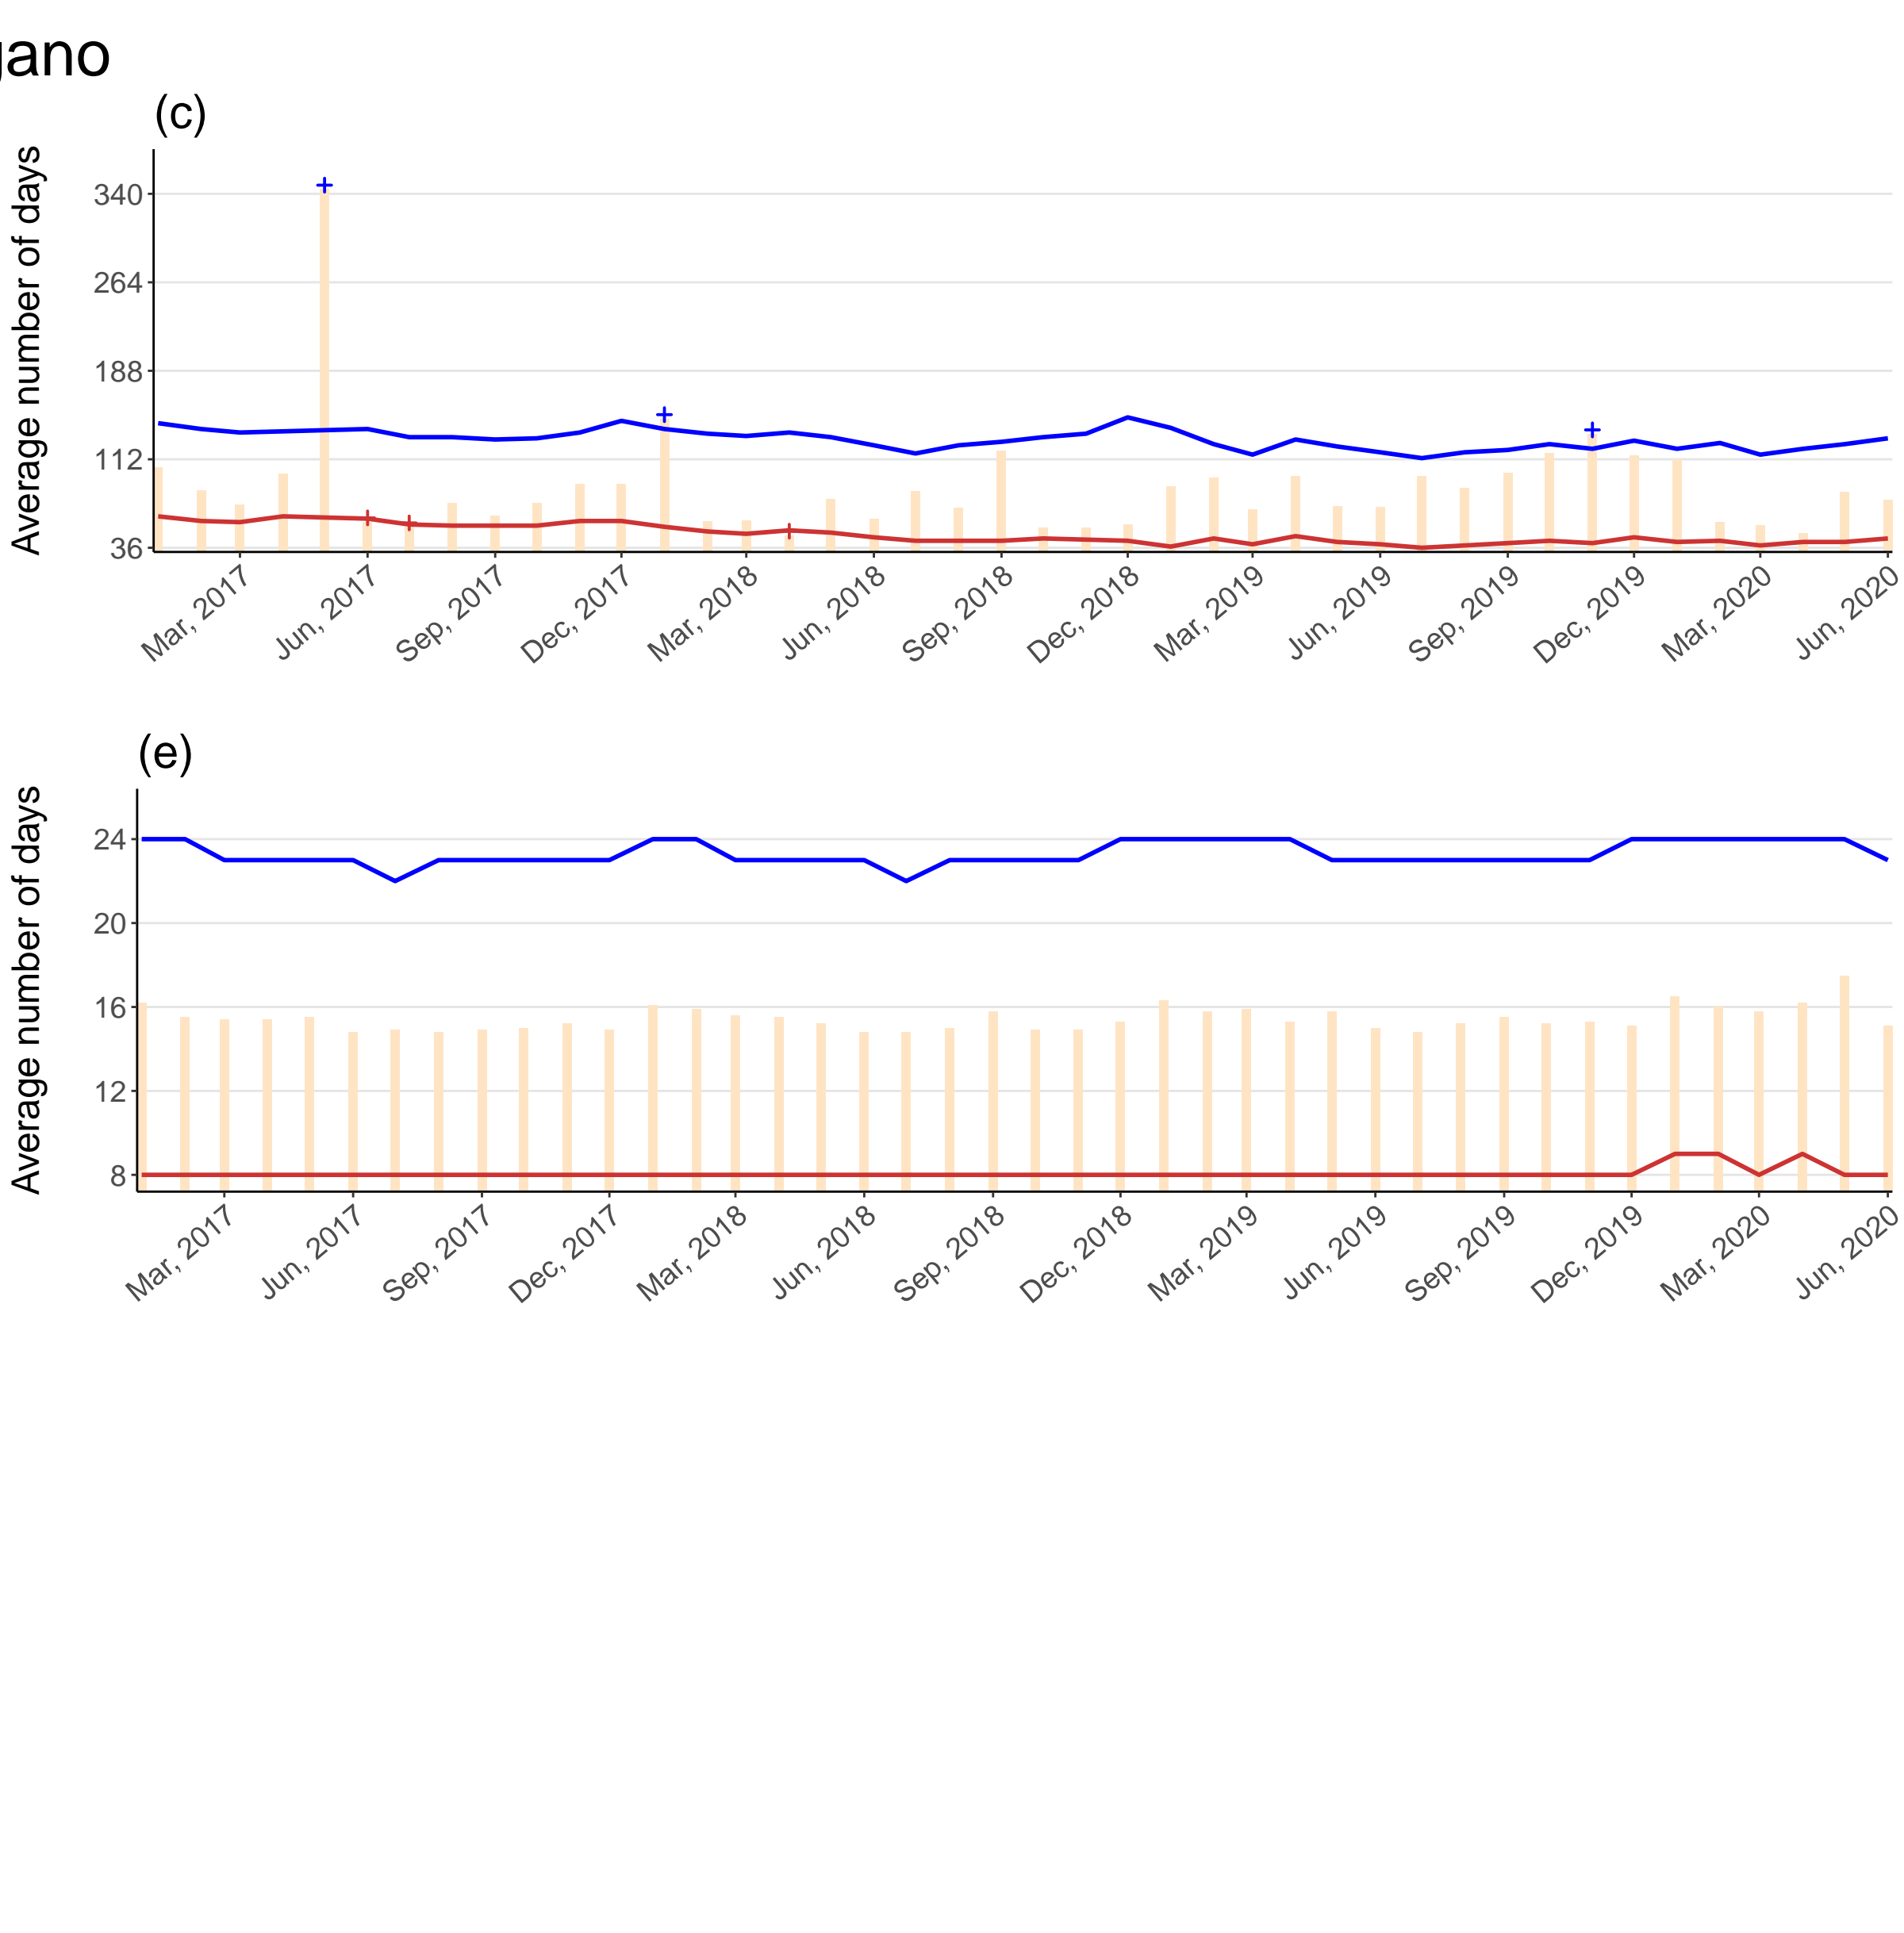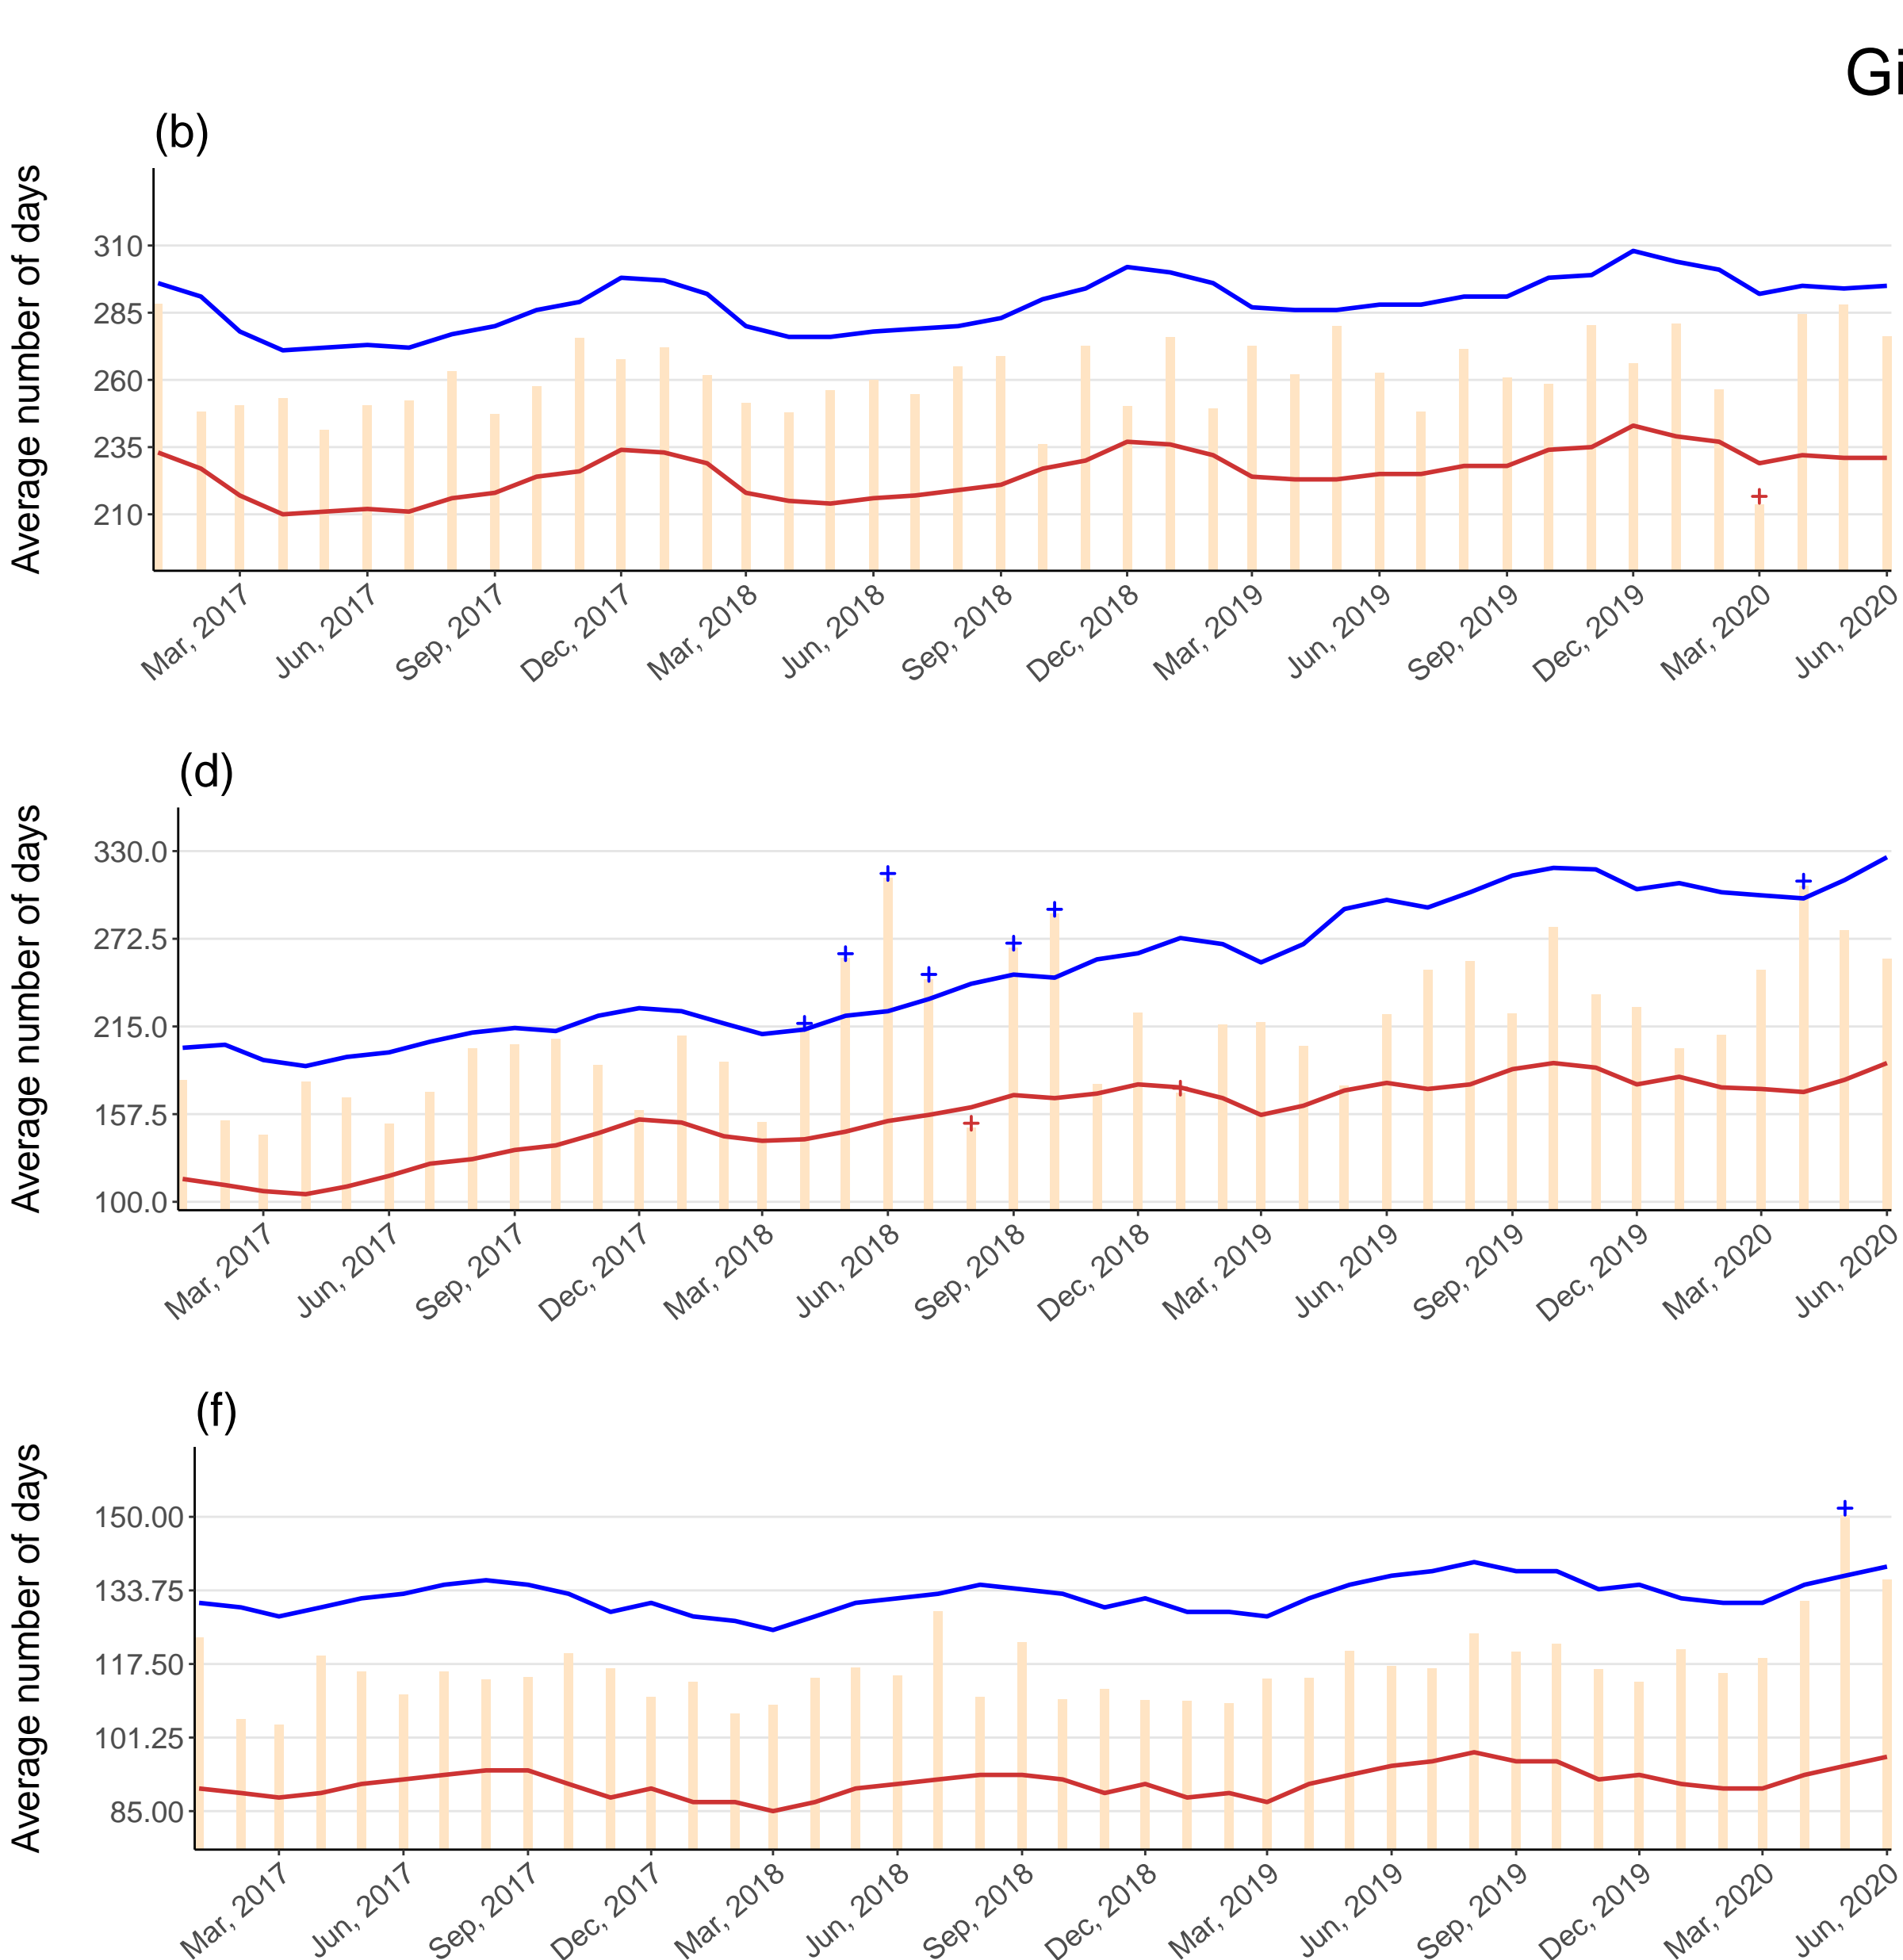

Nagano

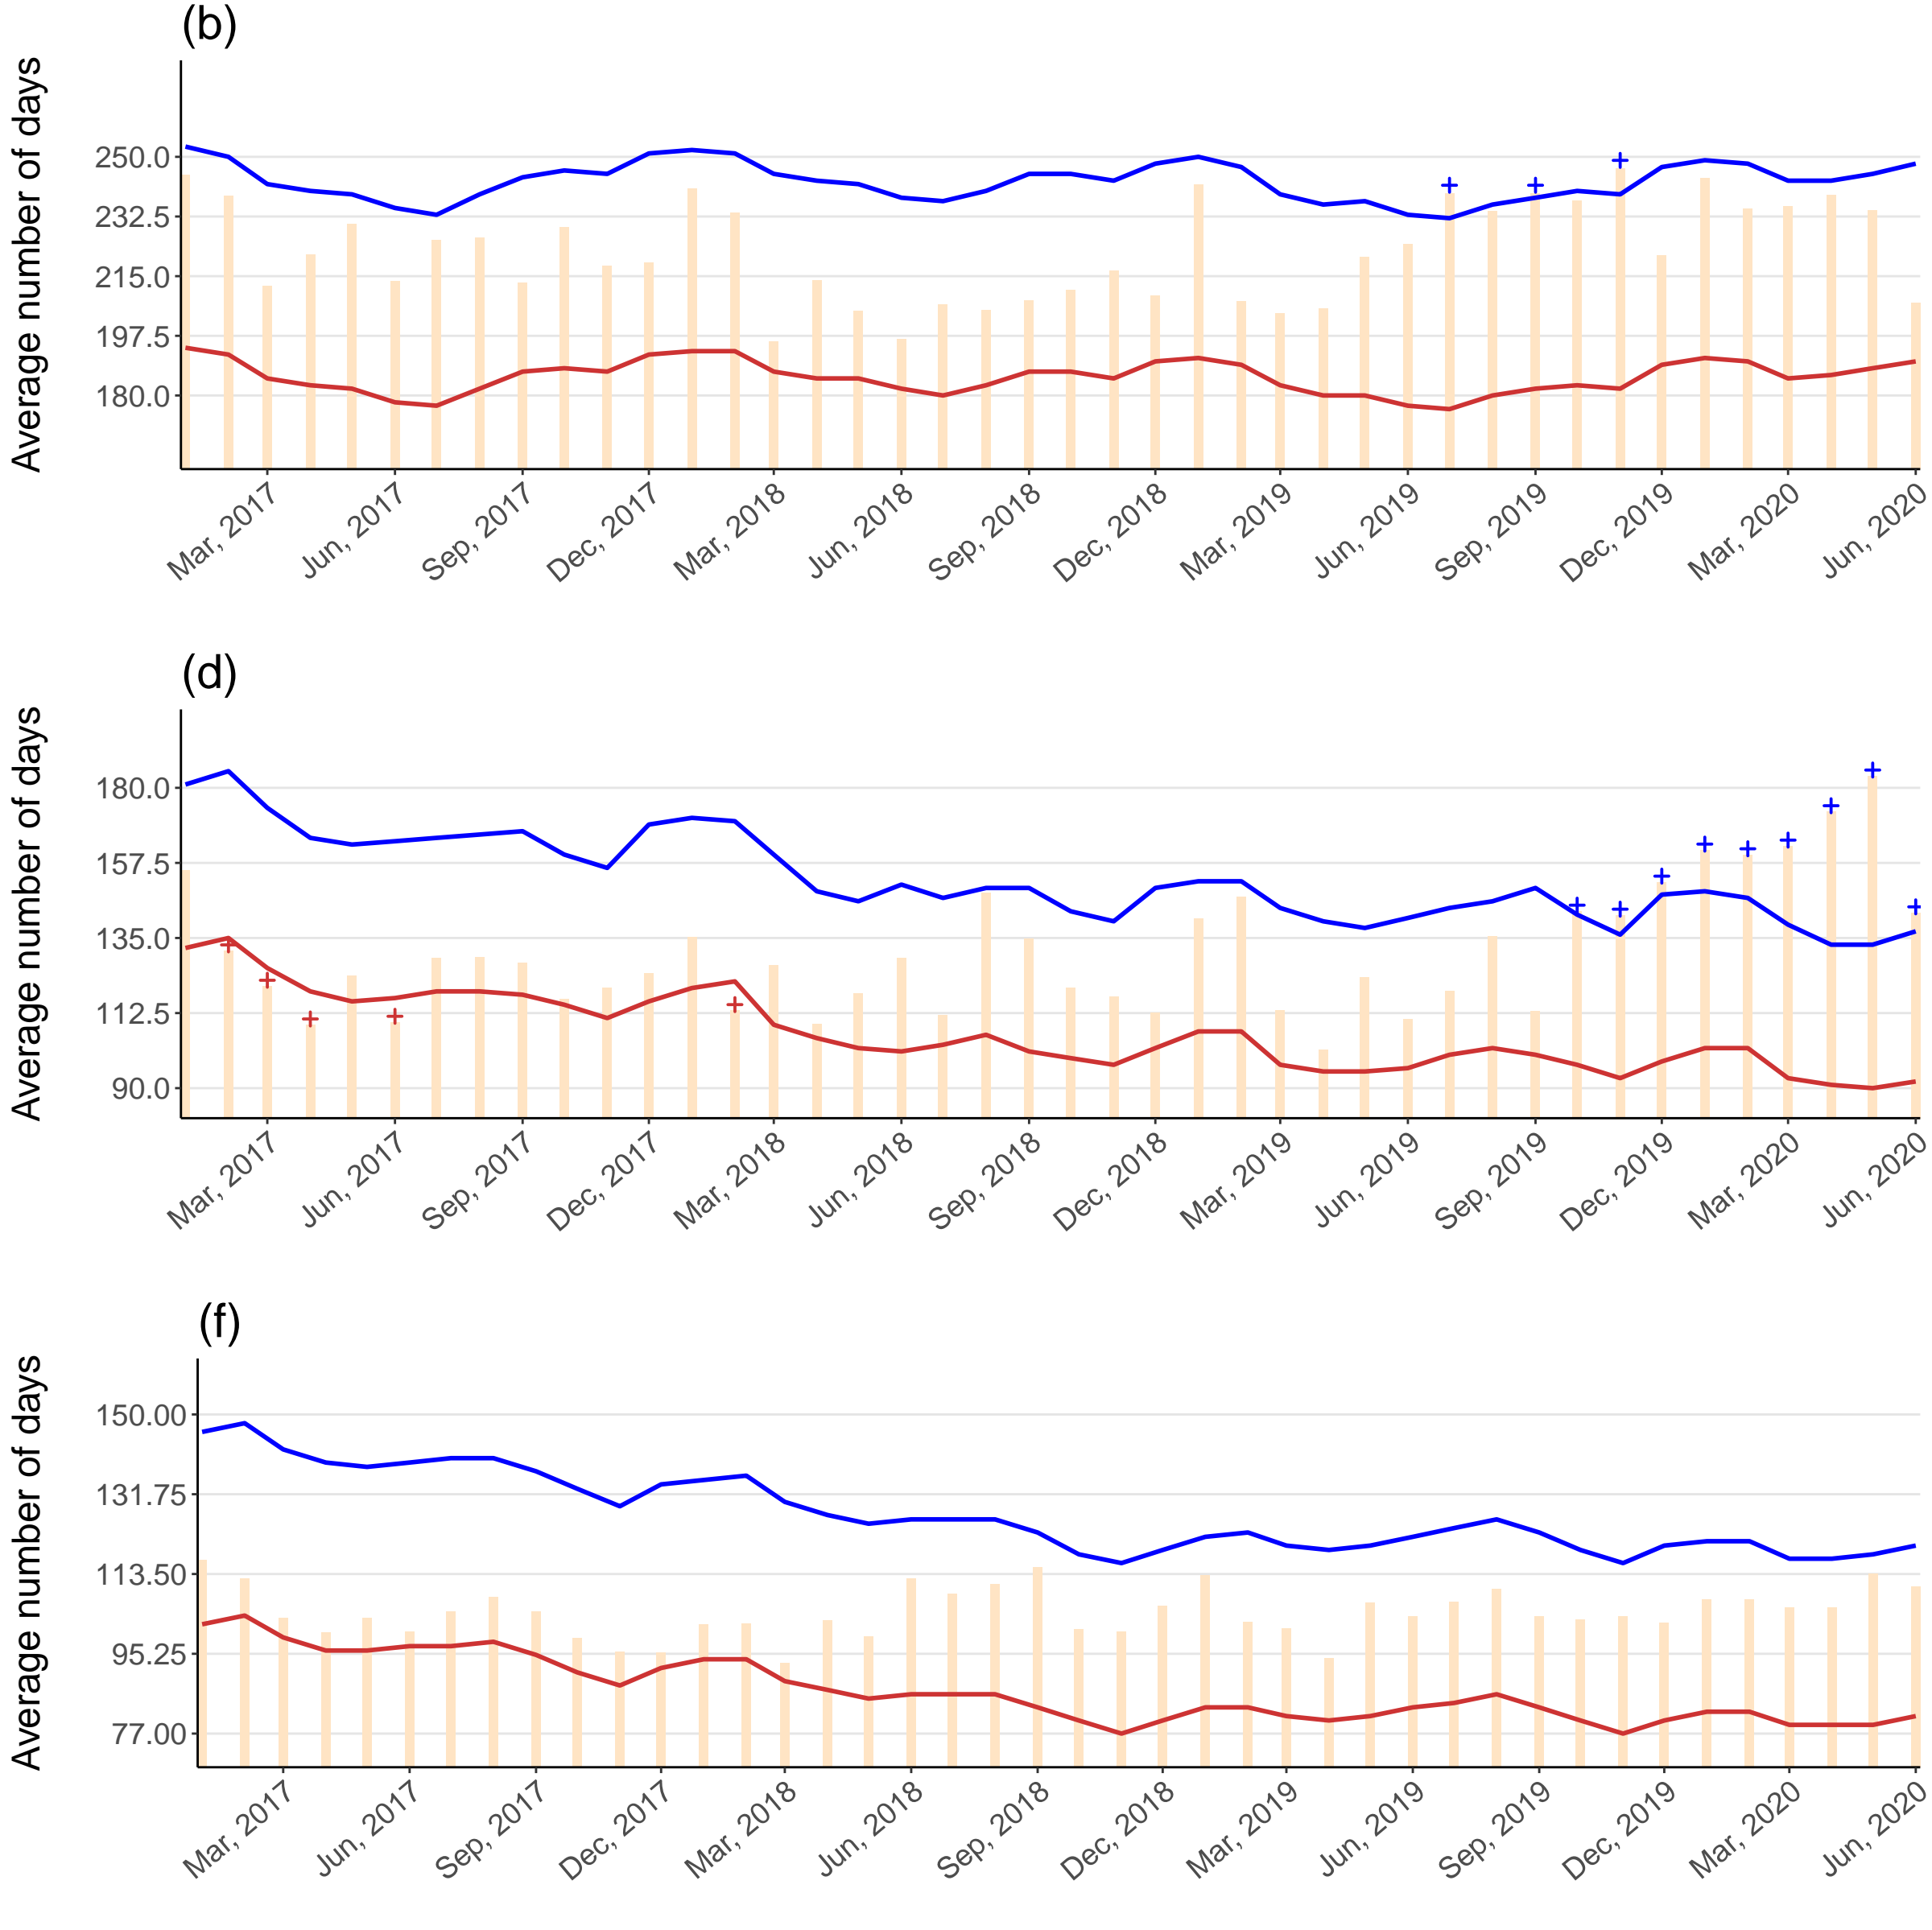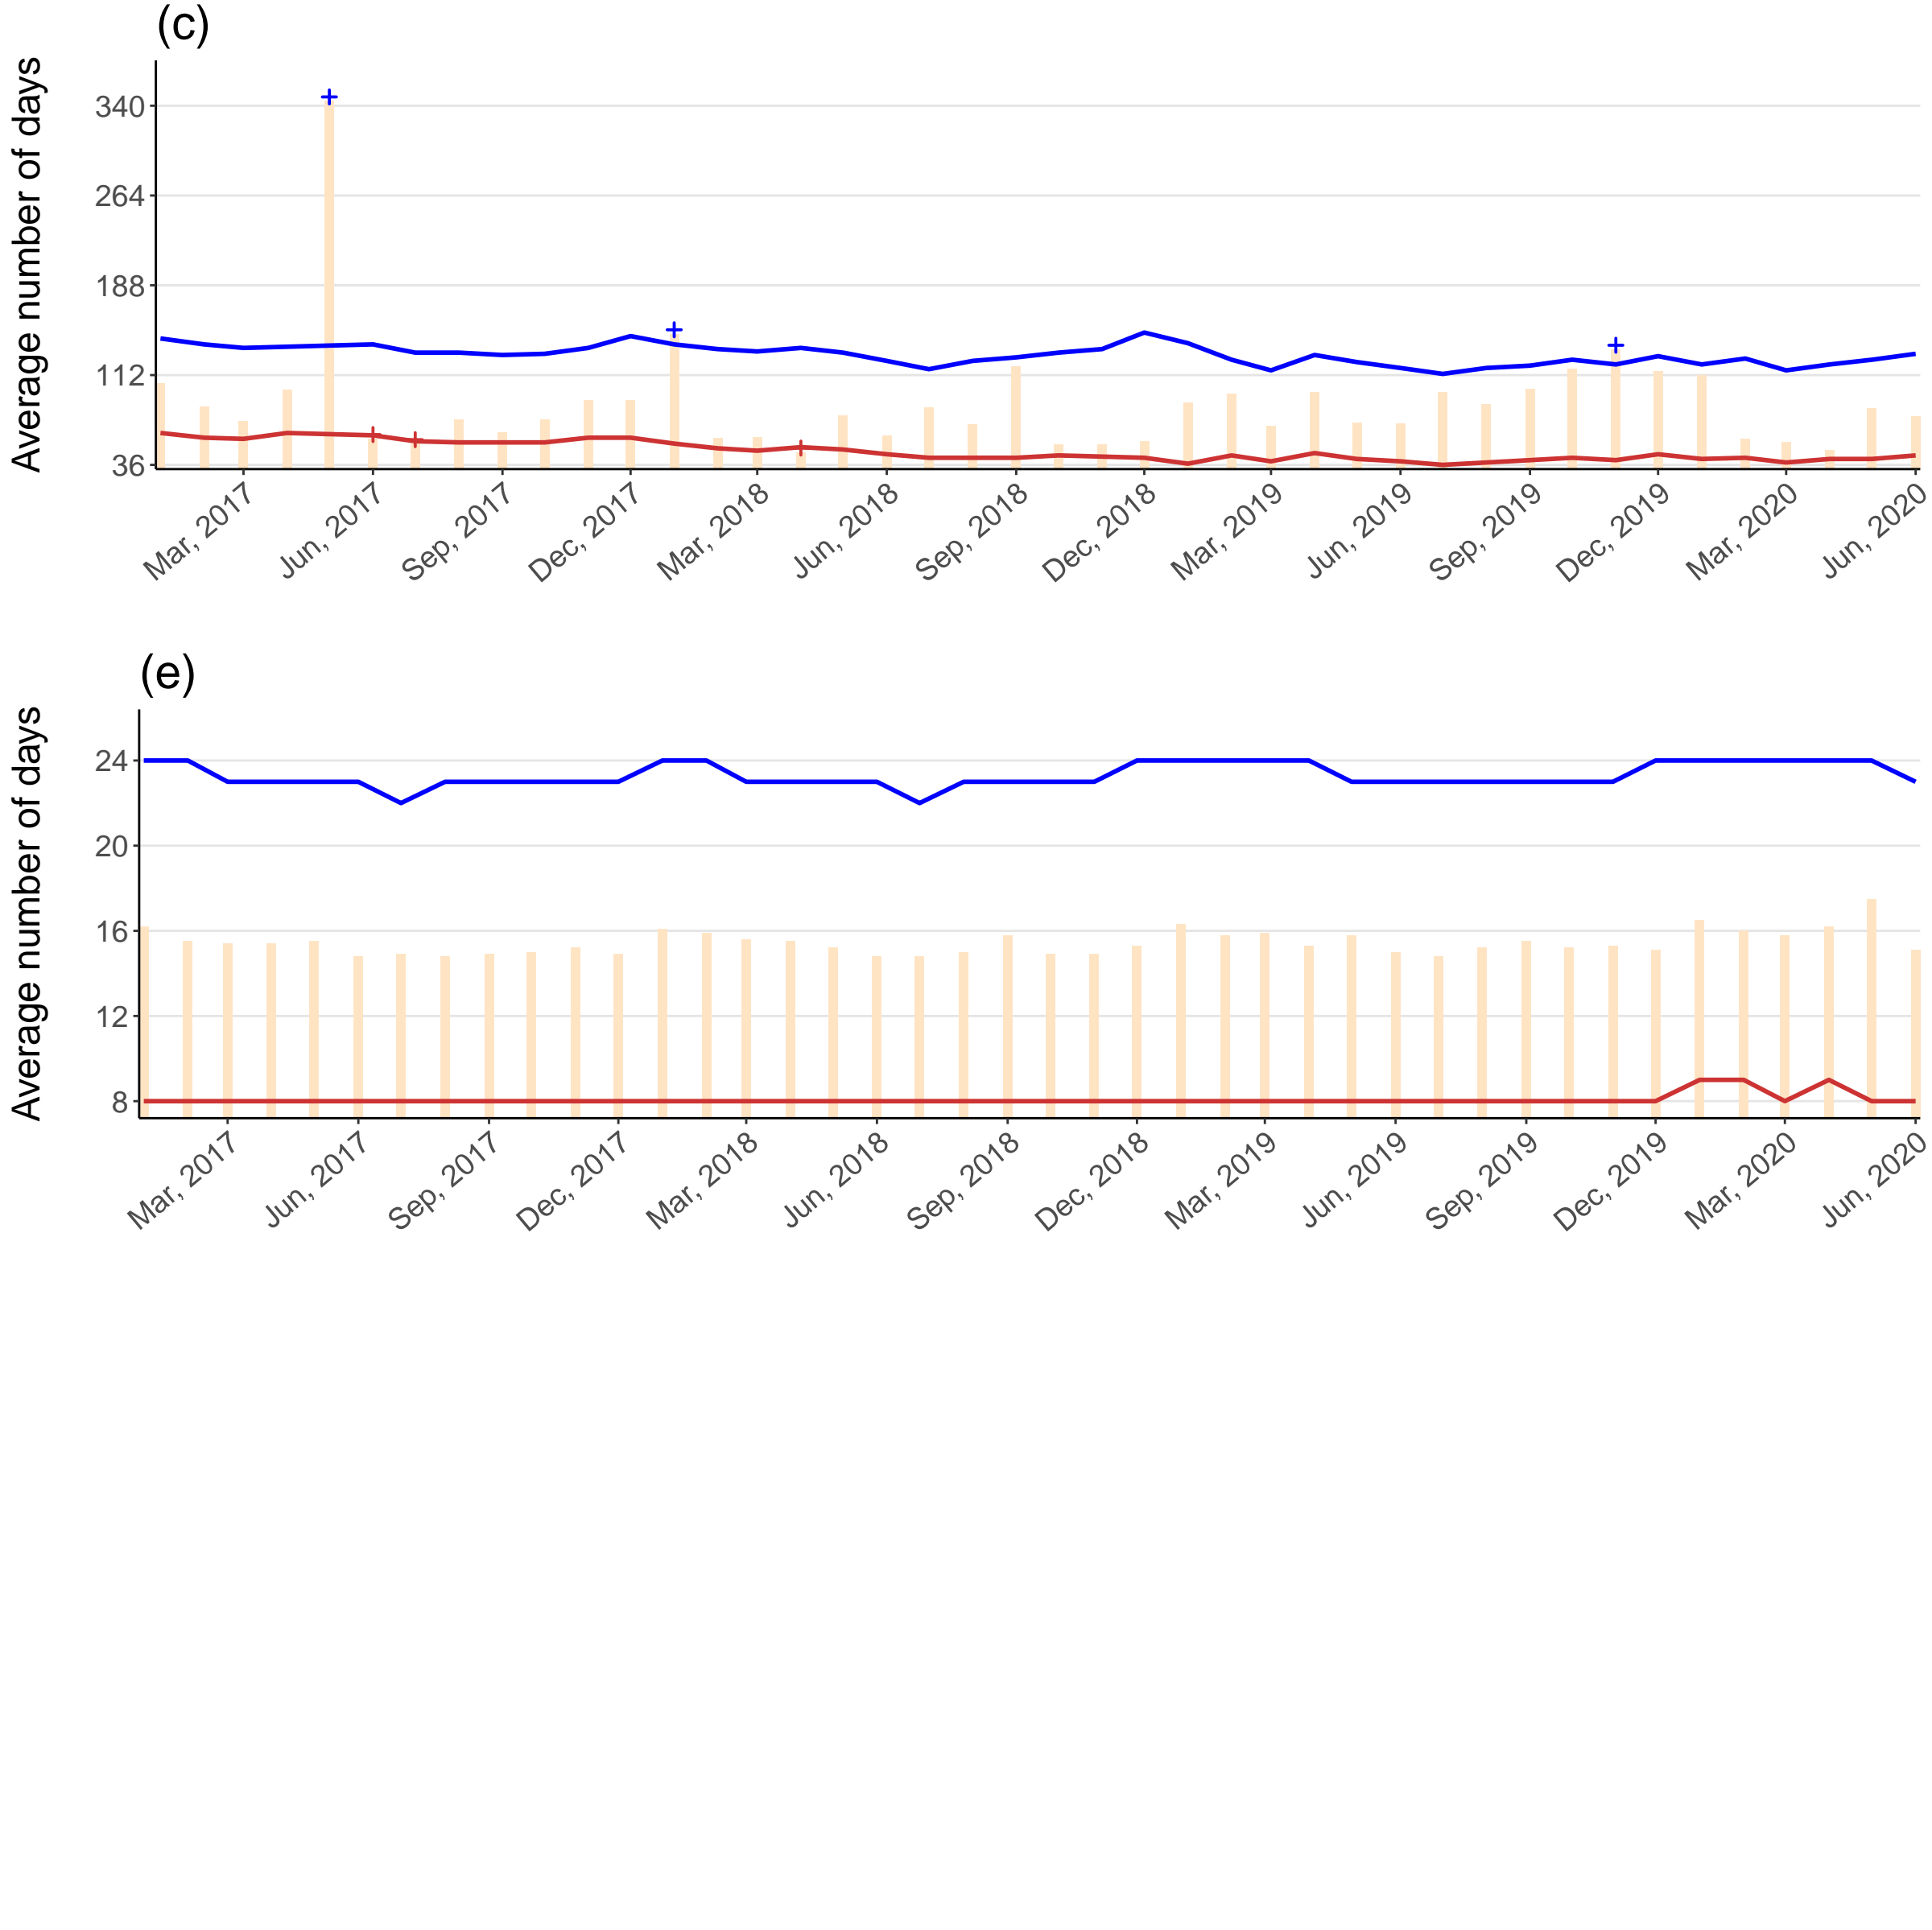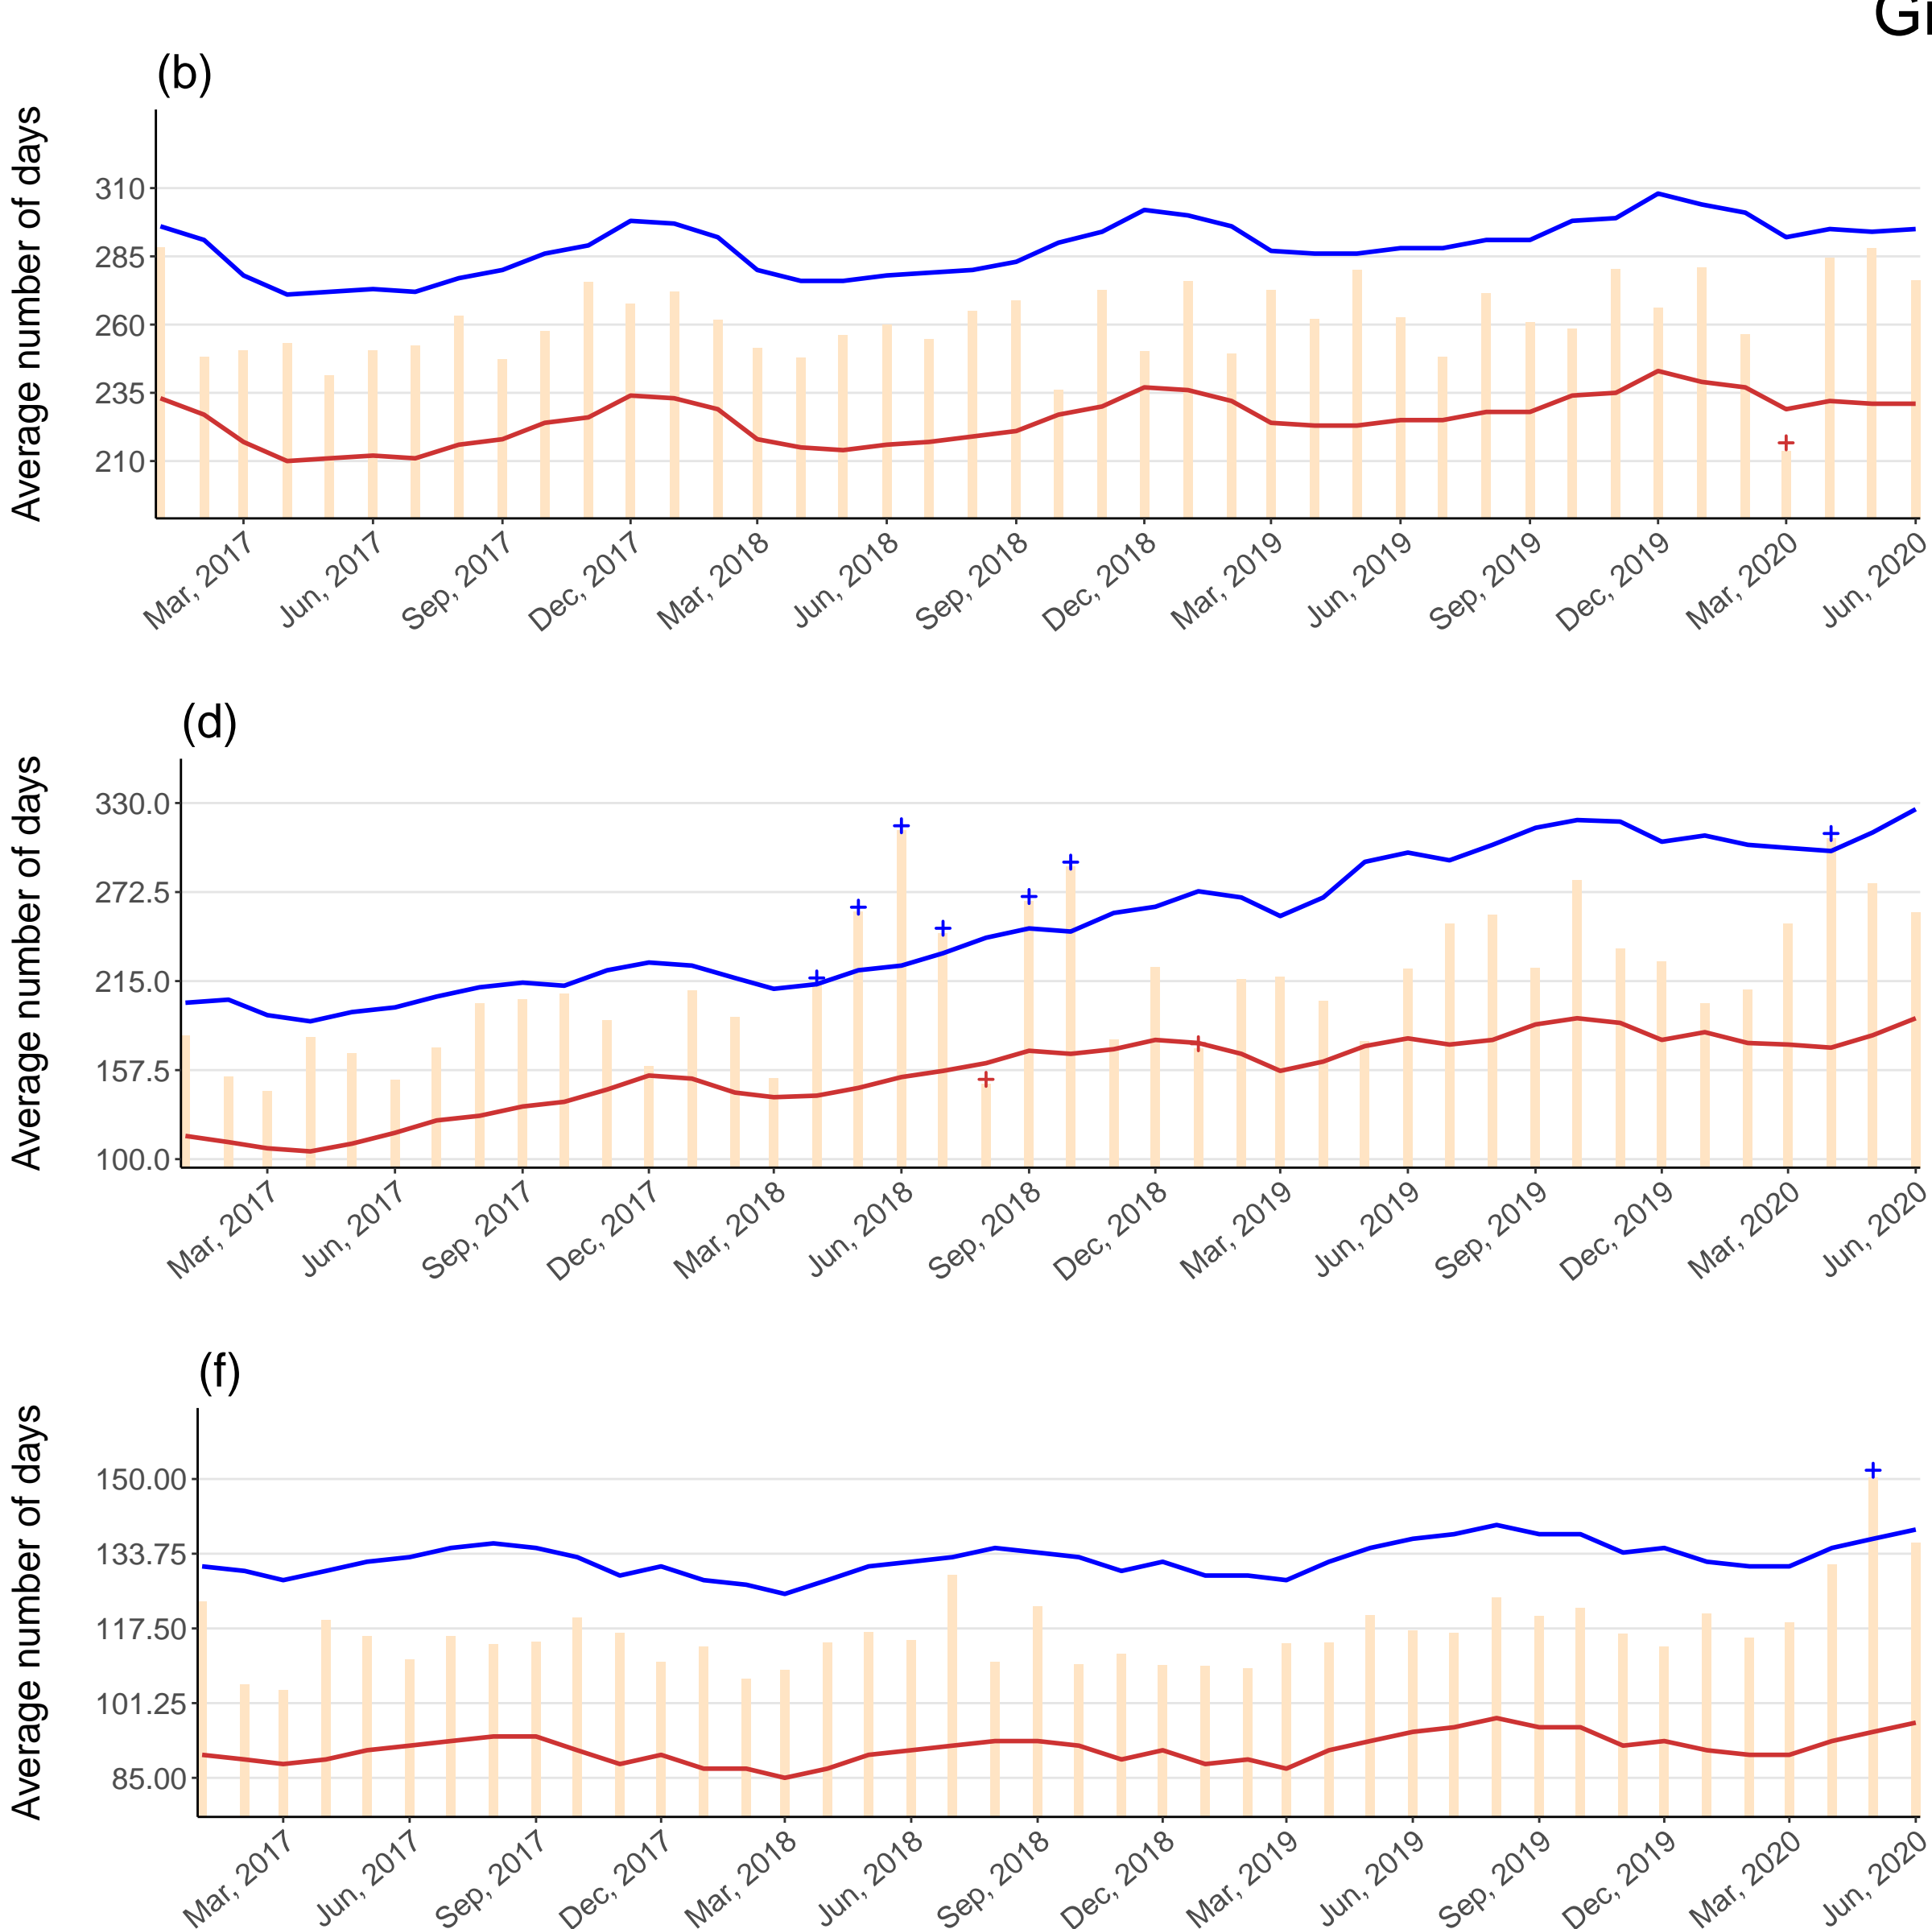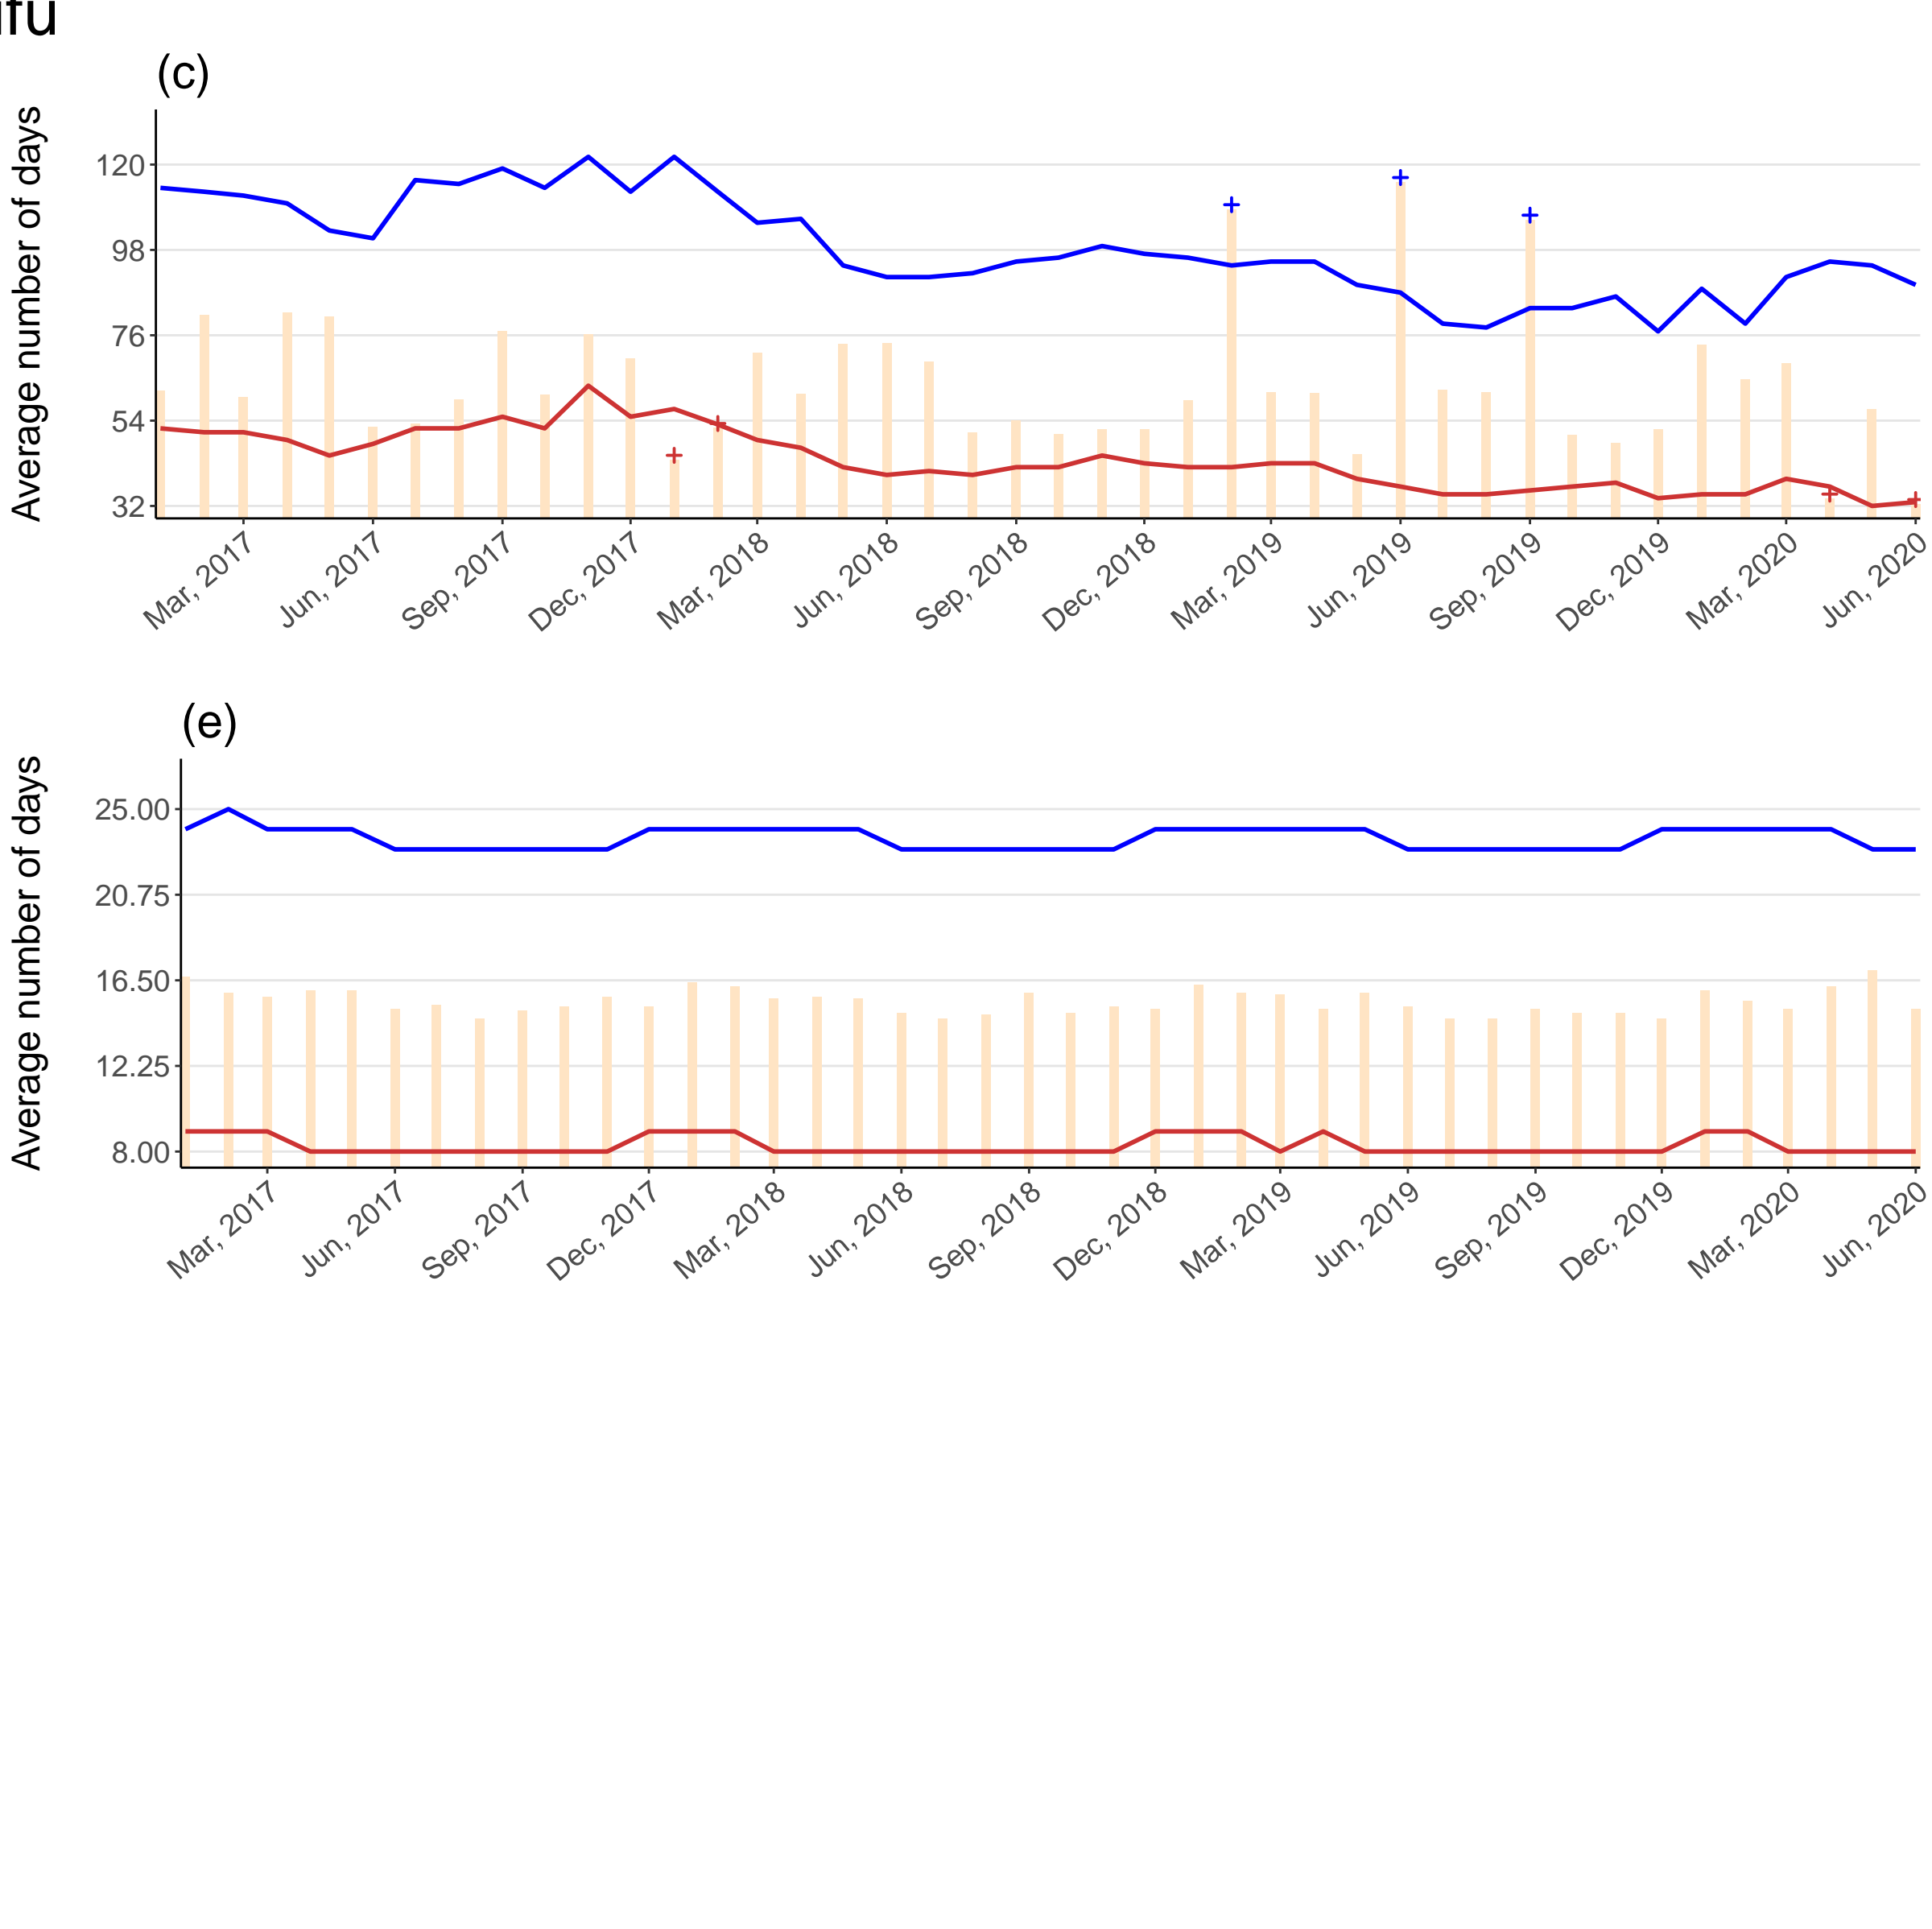

Gifu

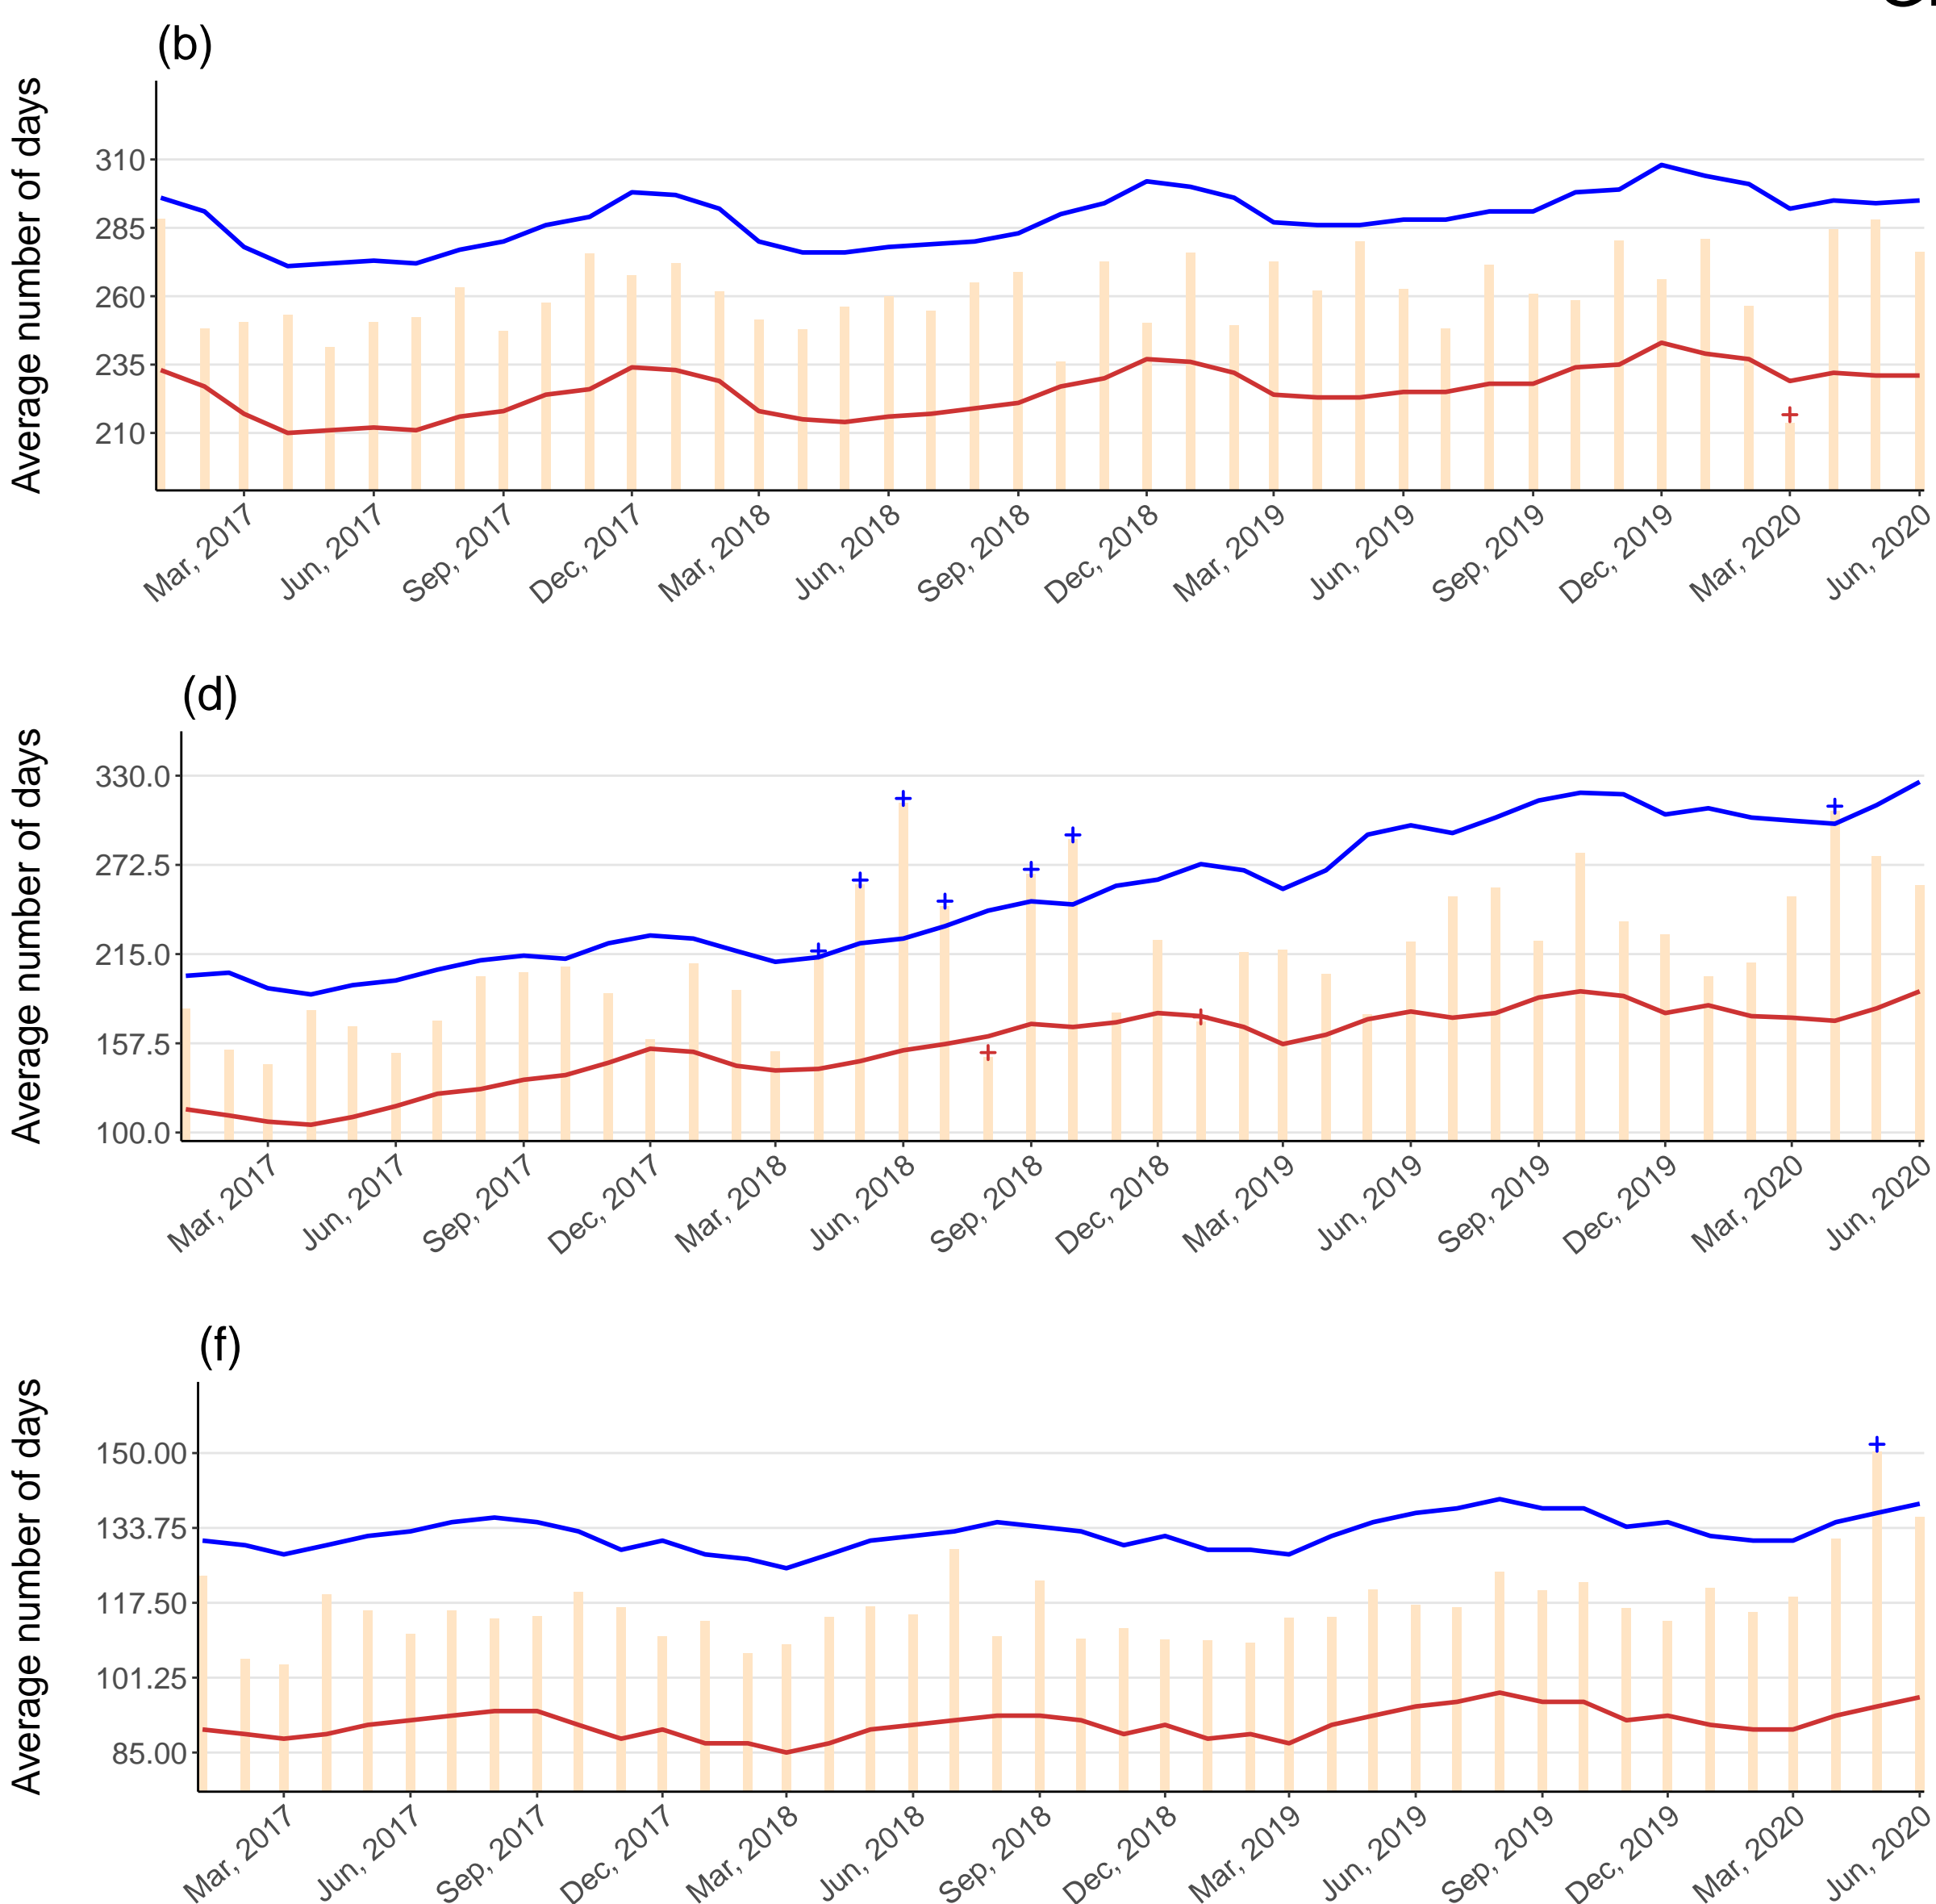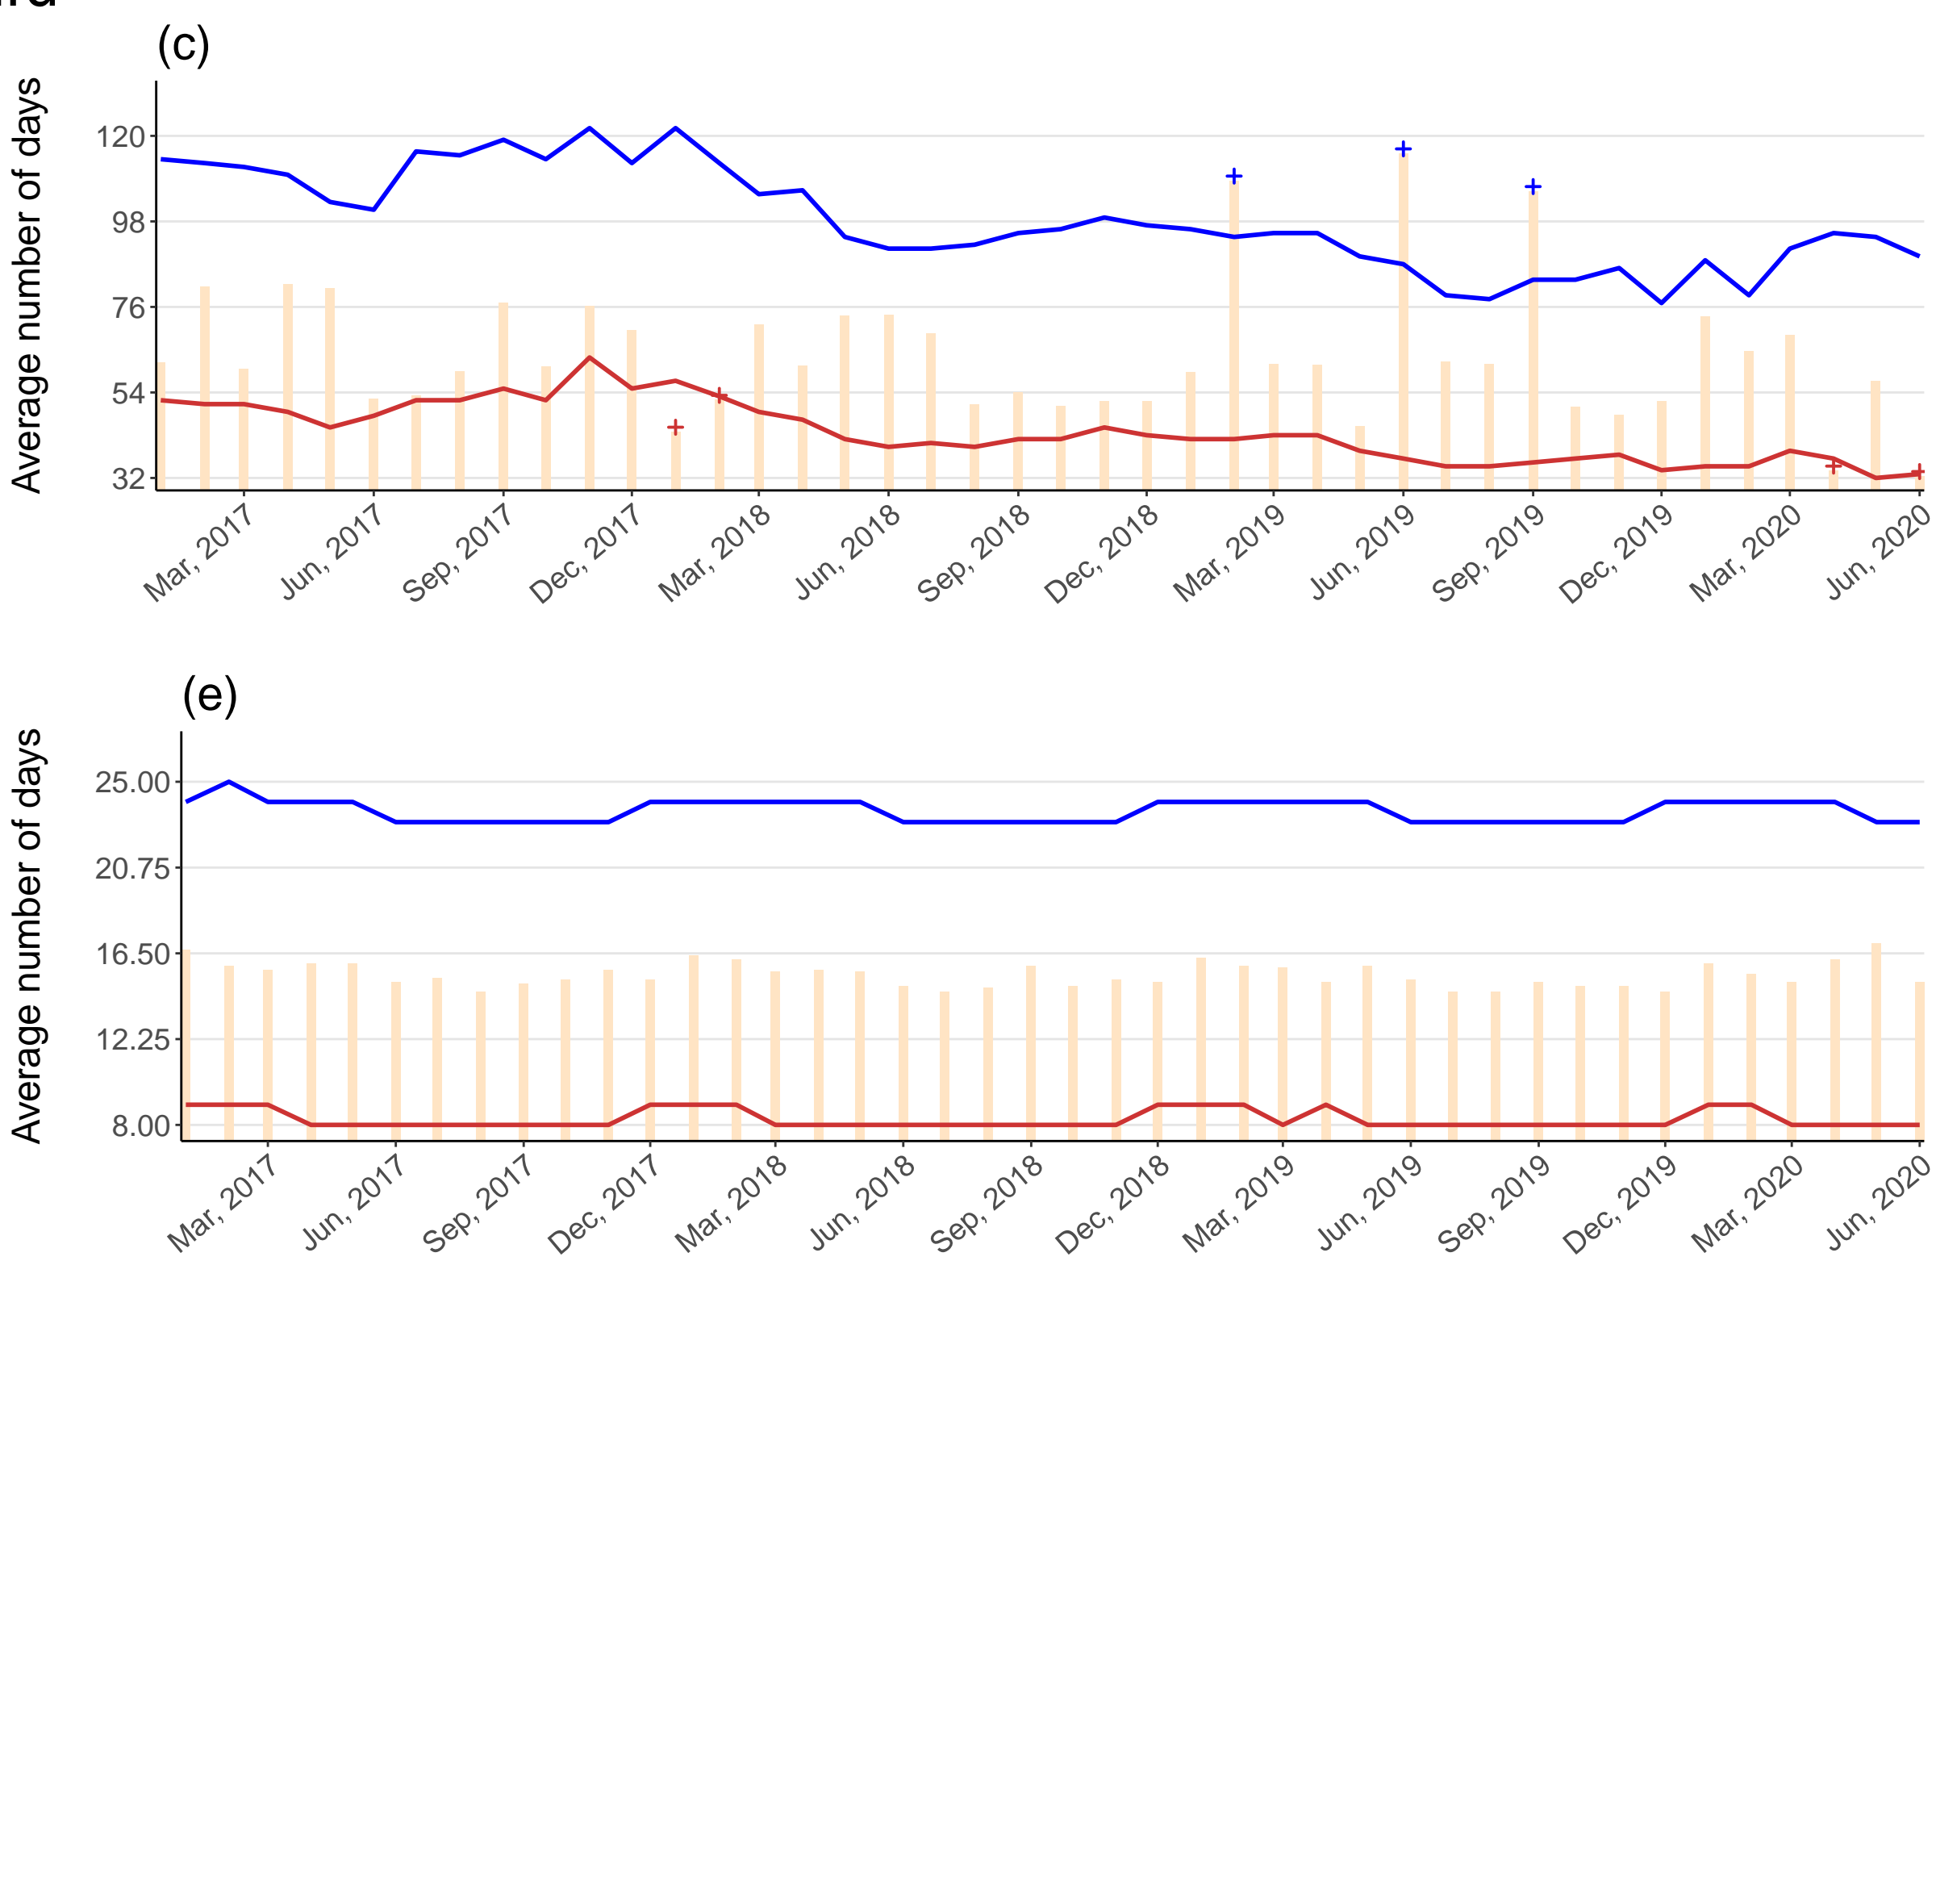



# Shizuoka

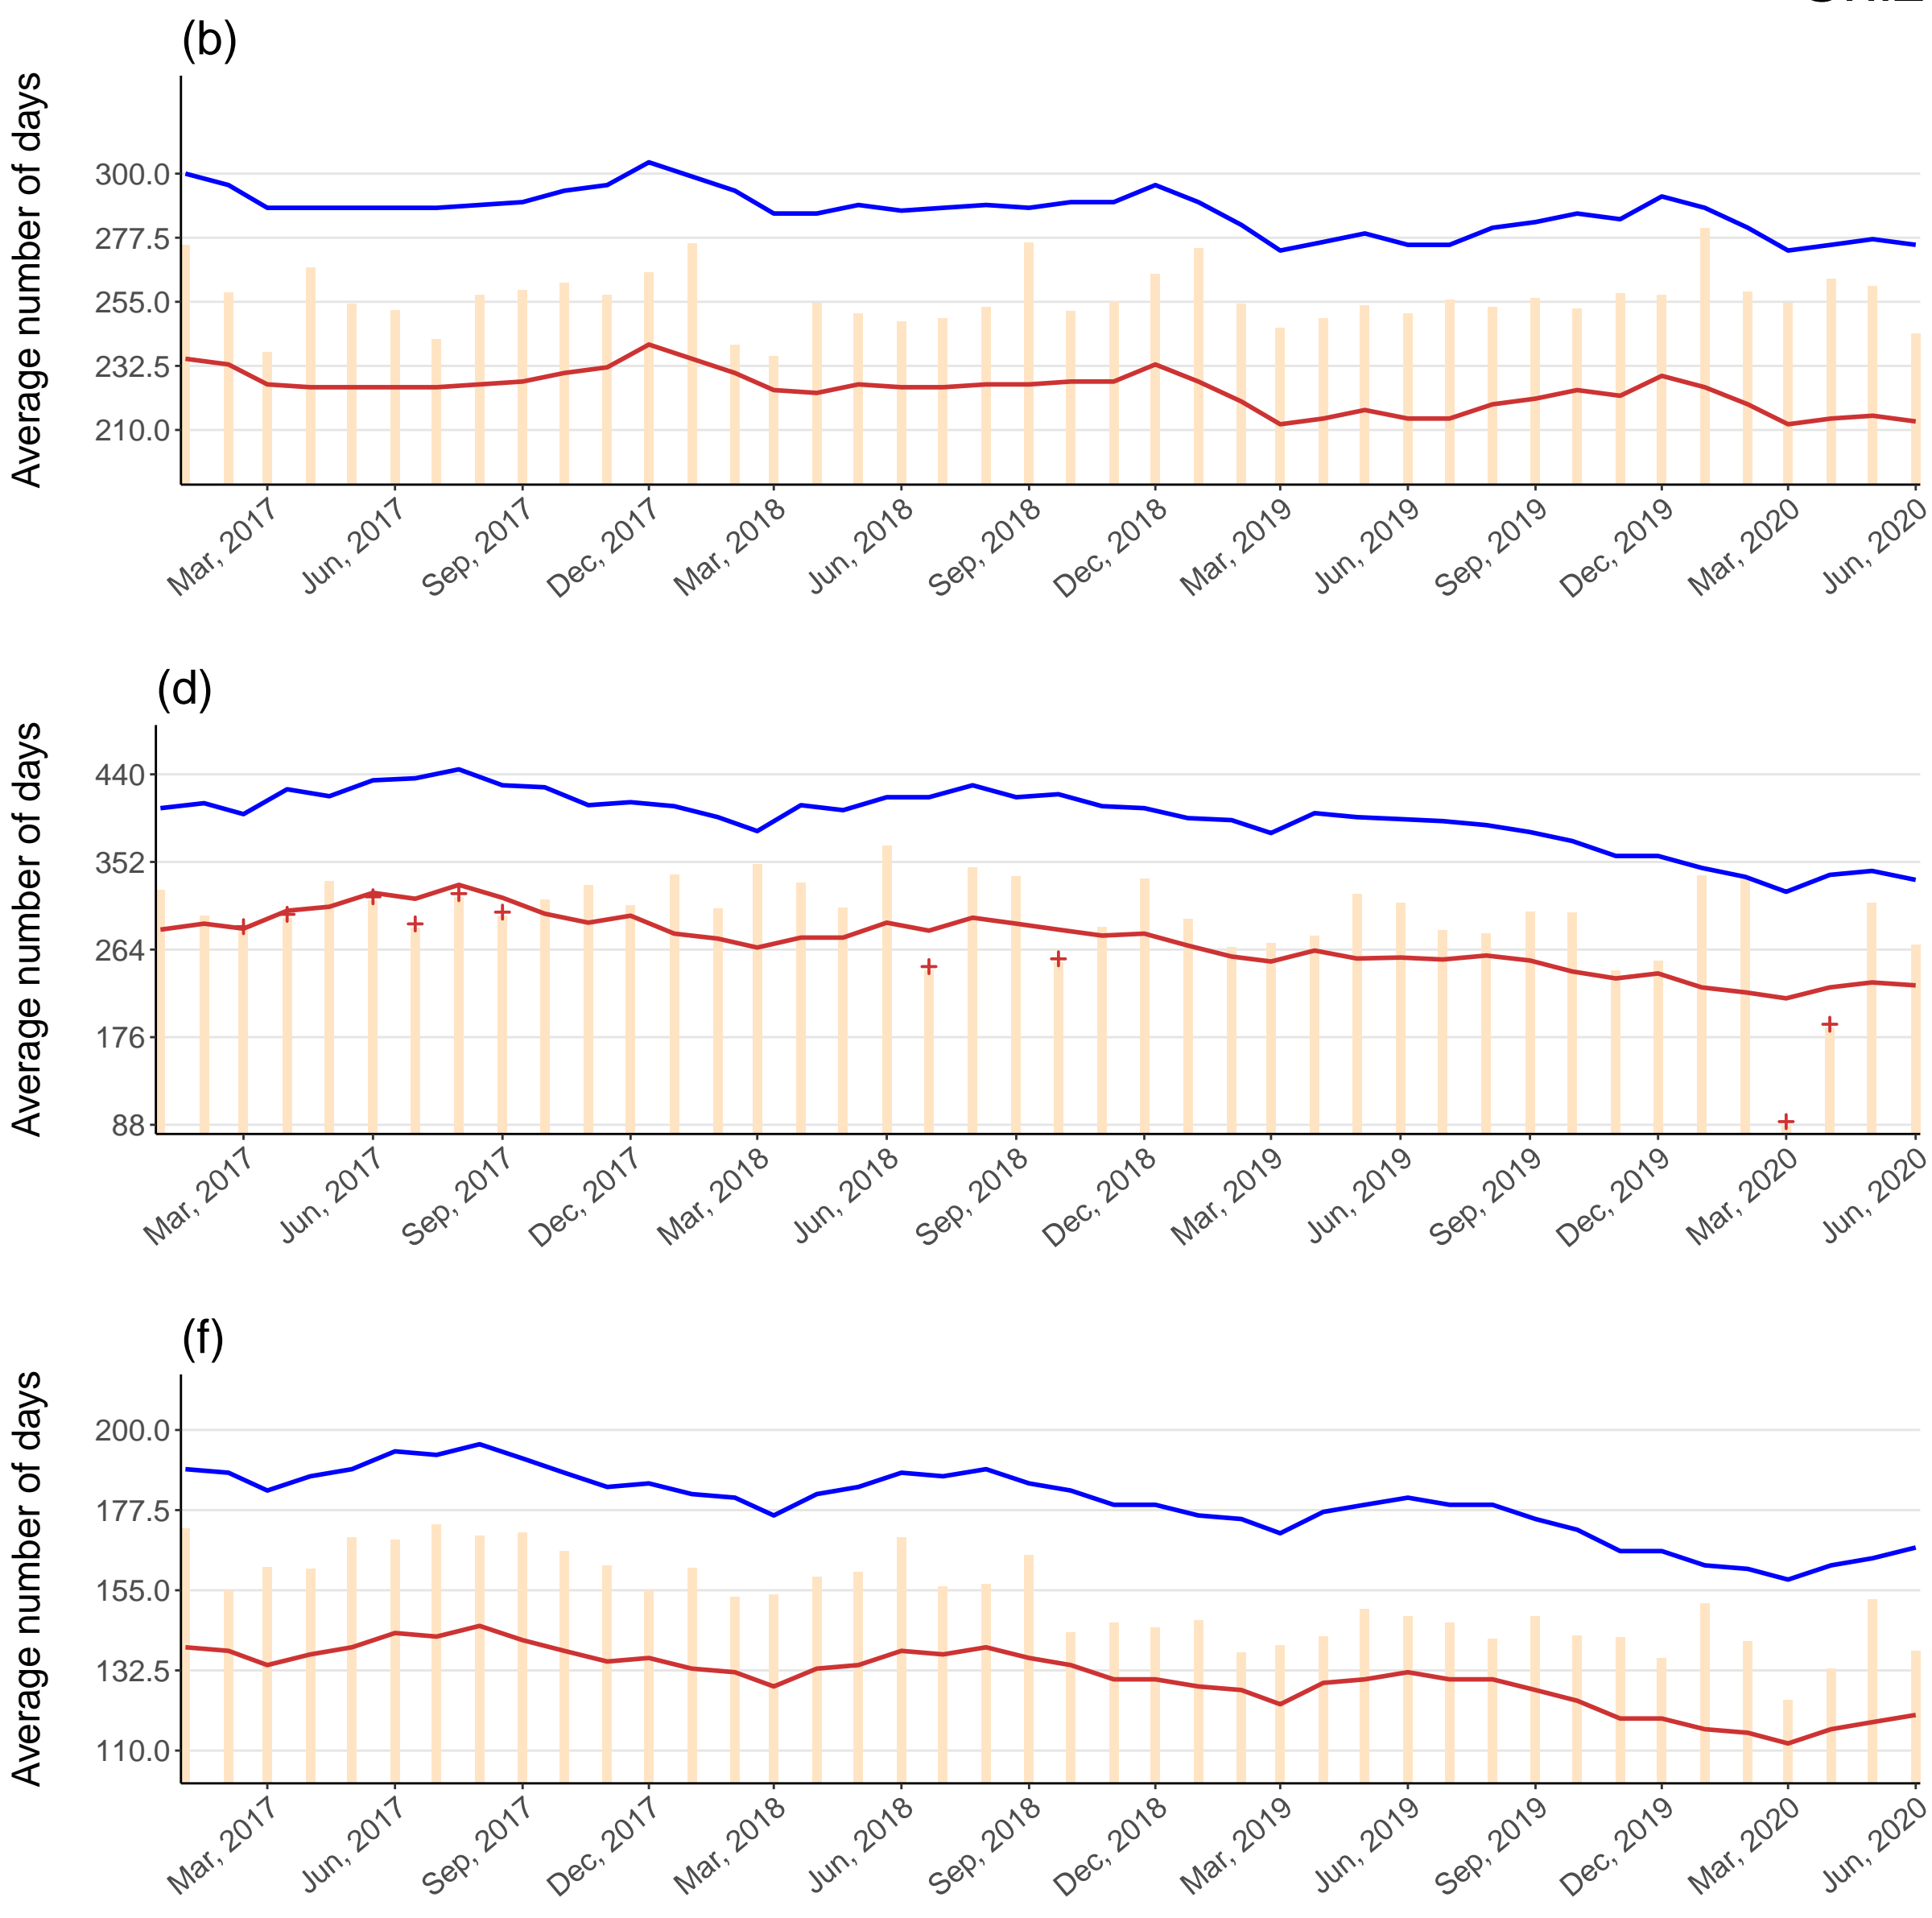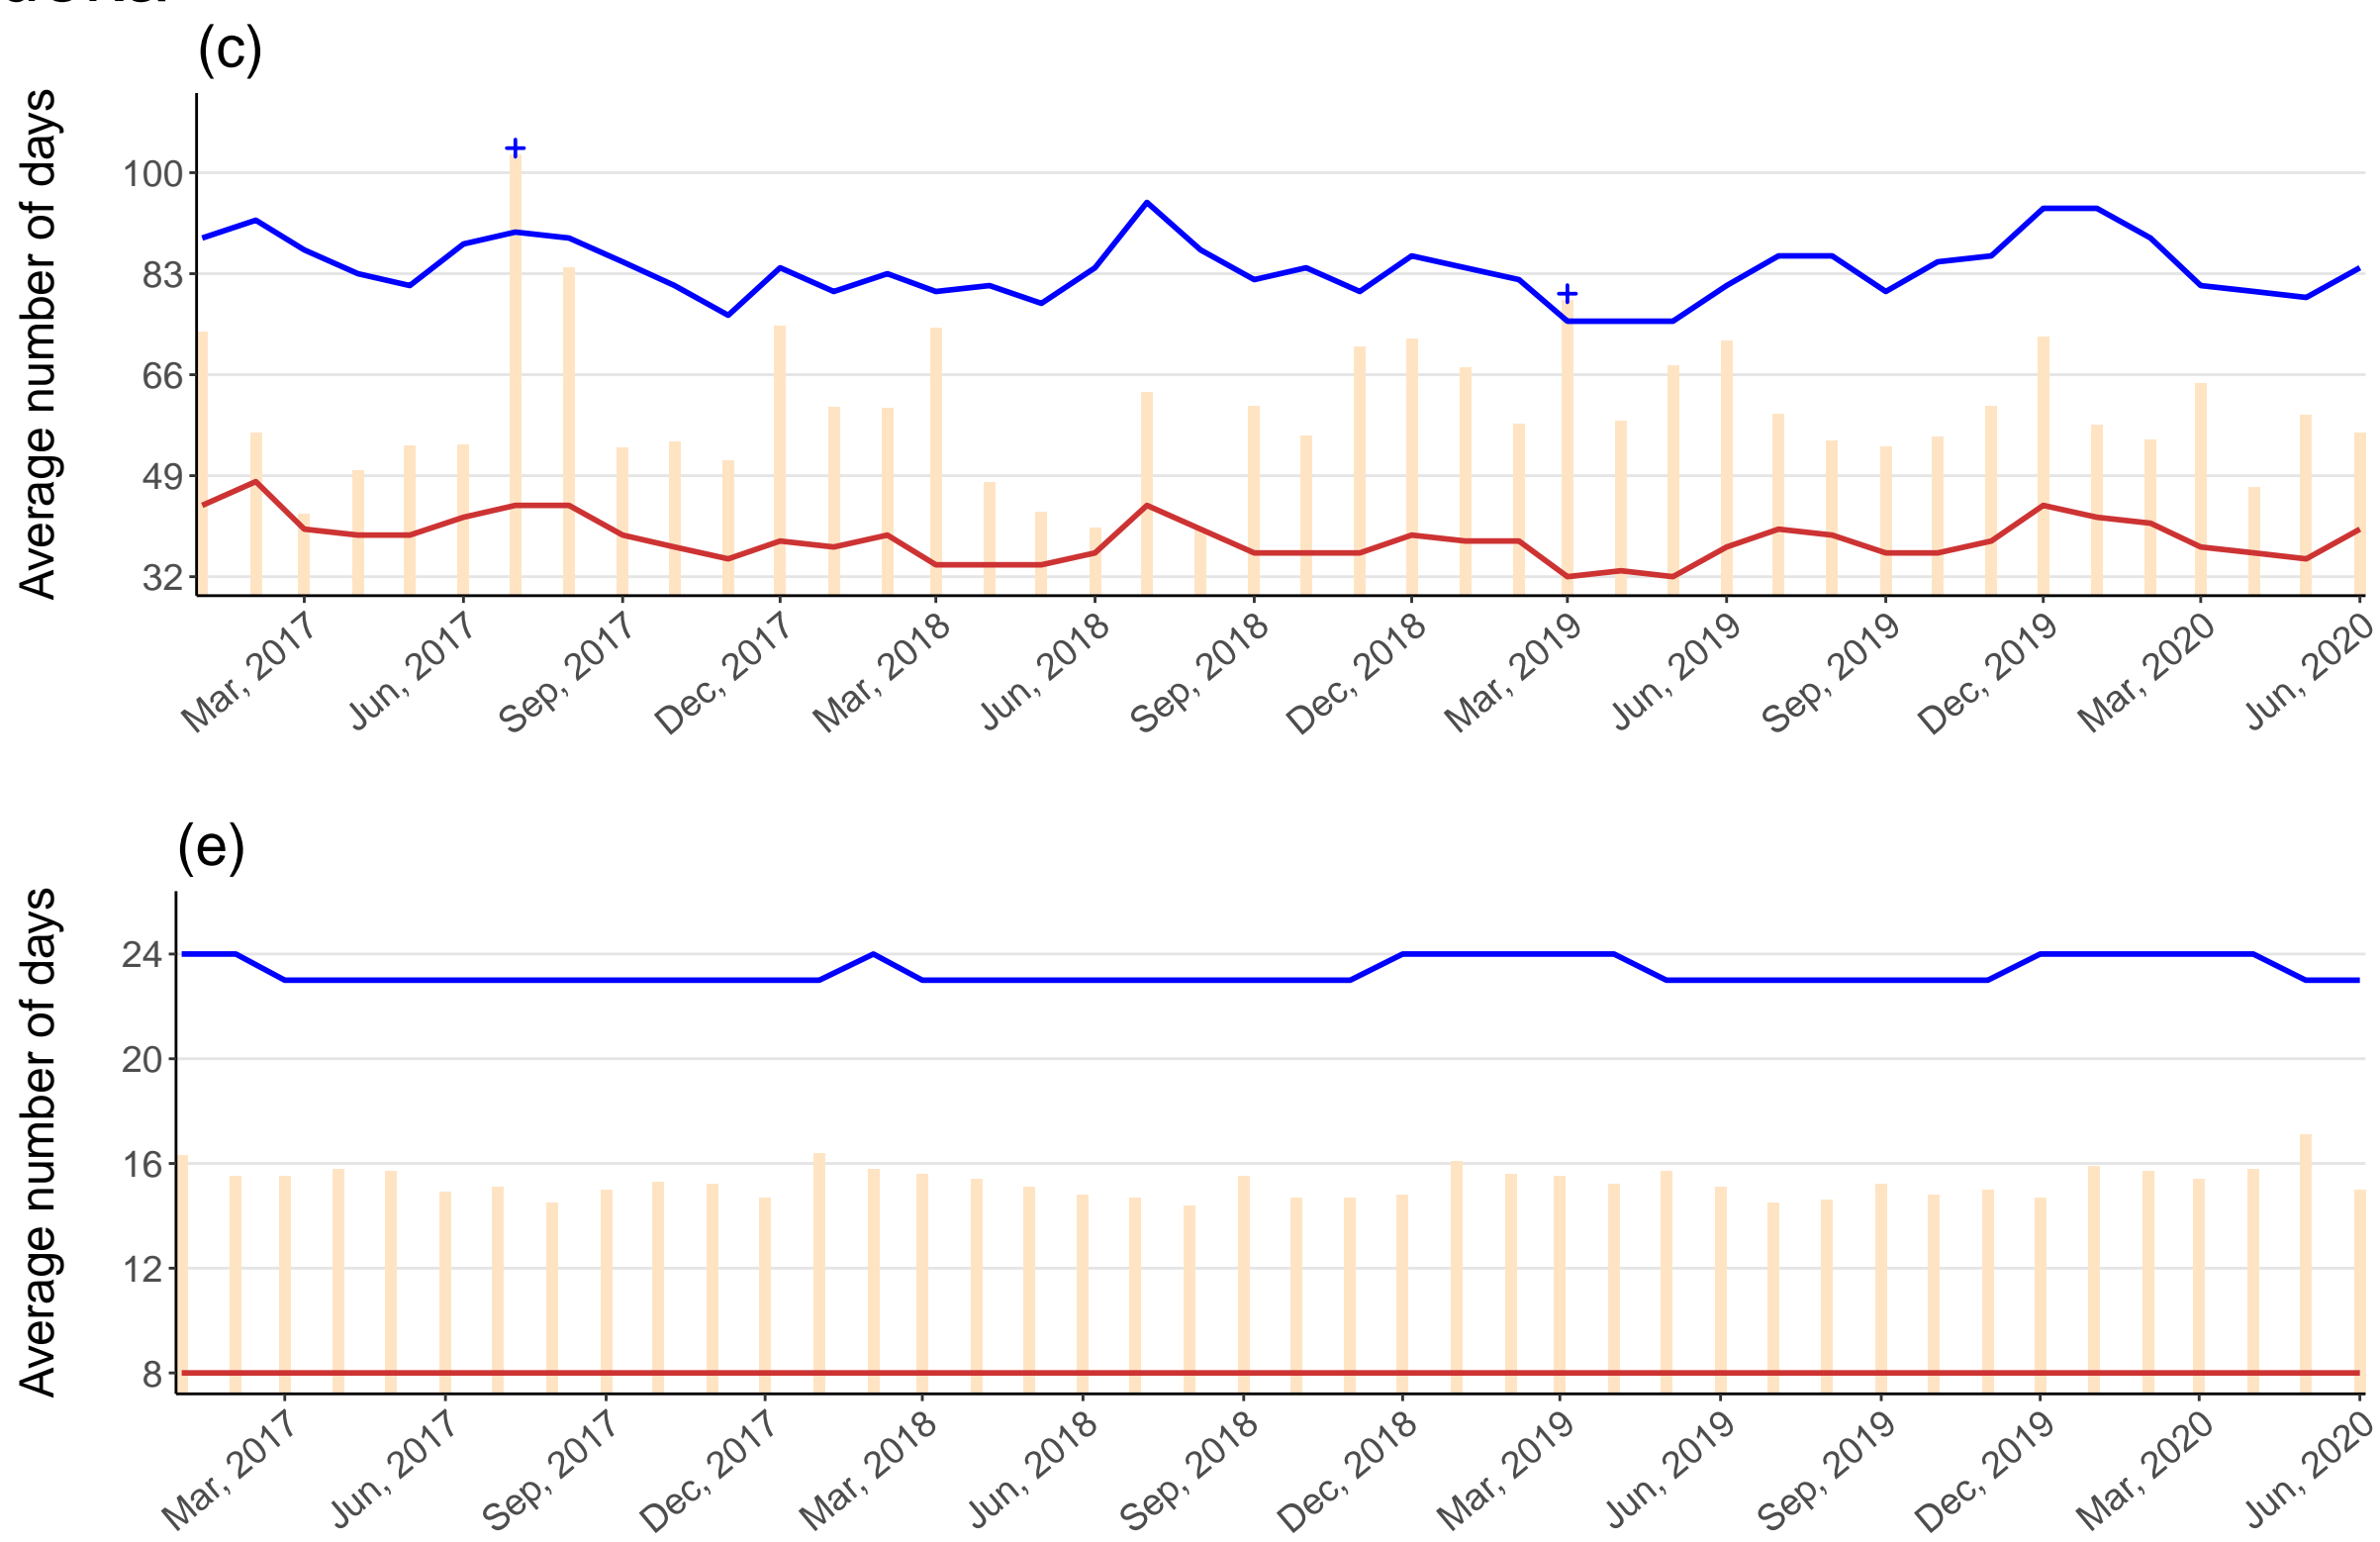

## Aichi

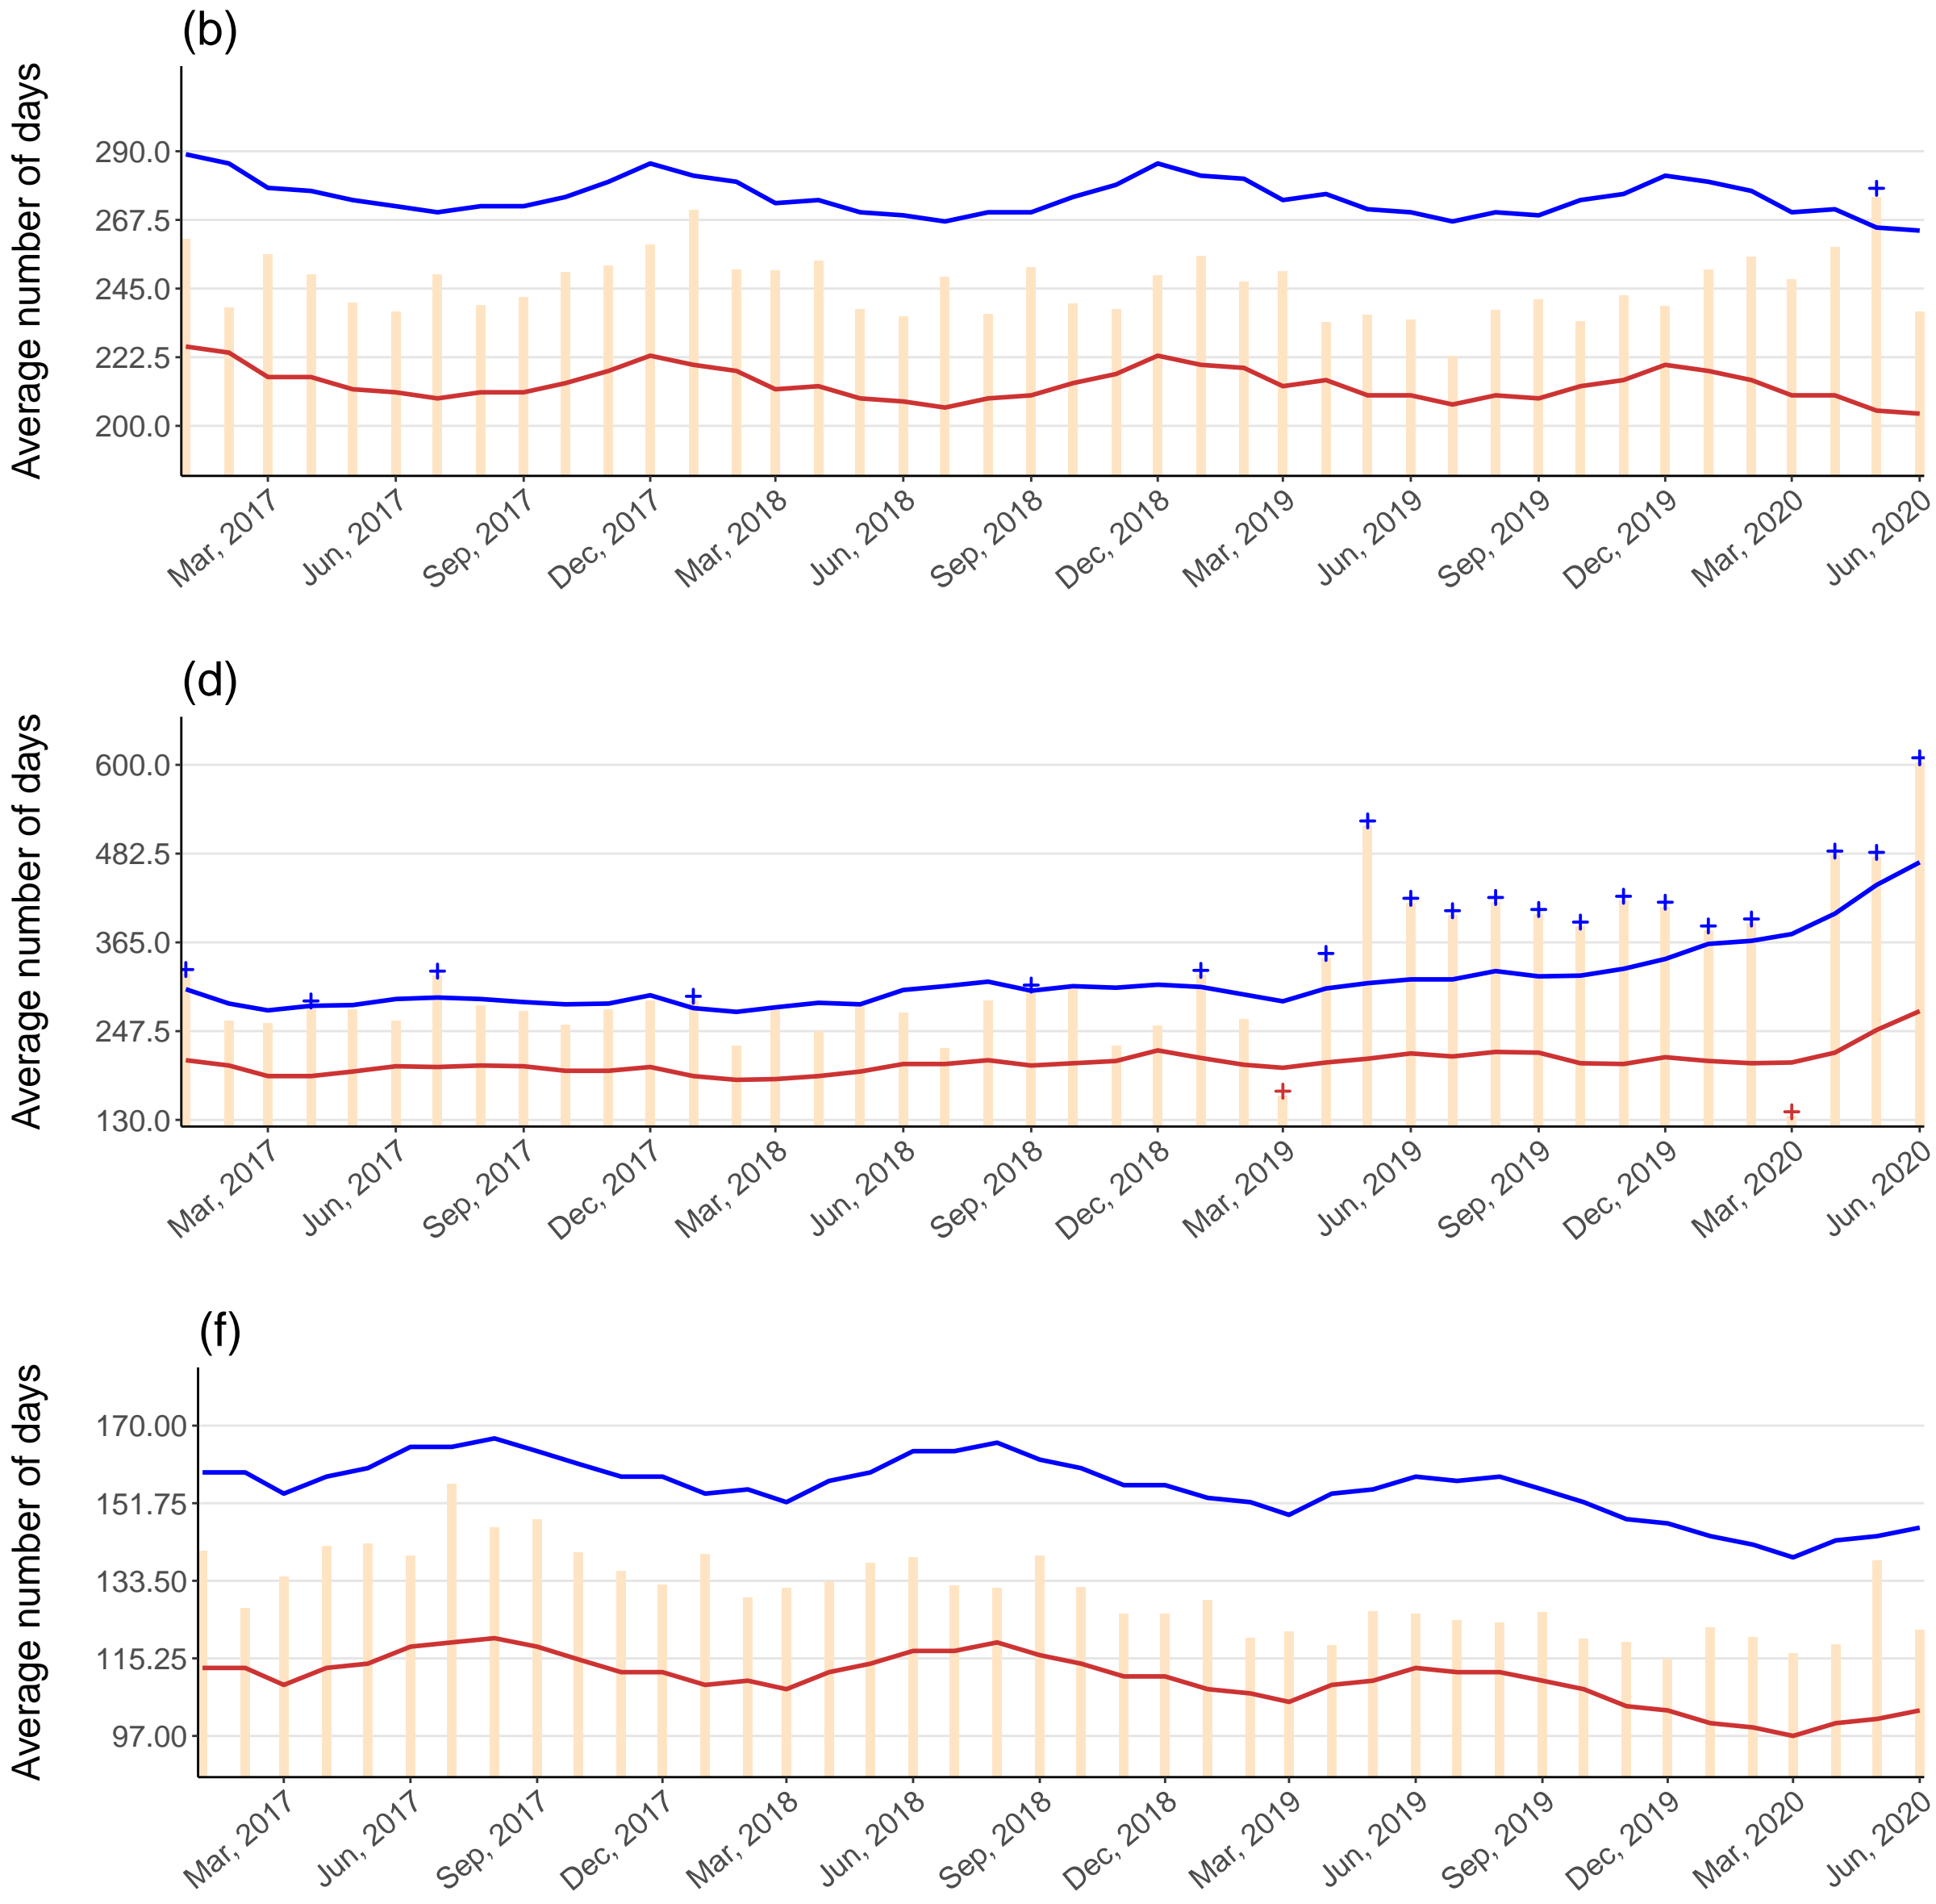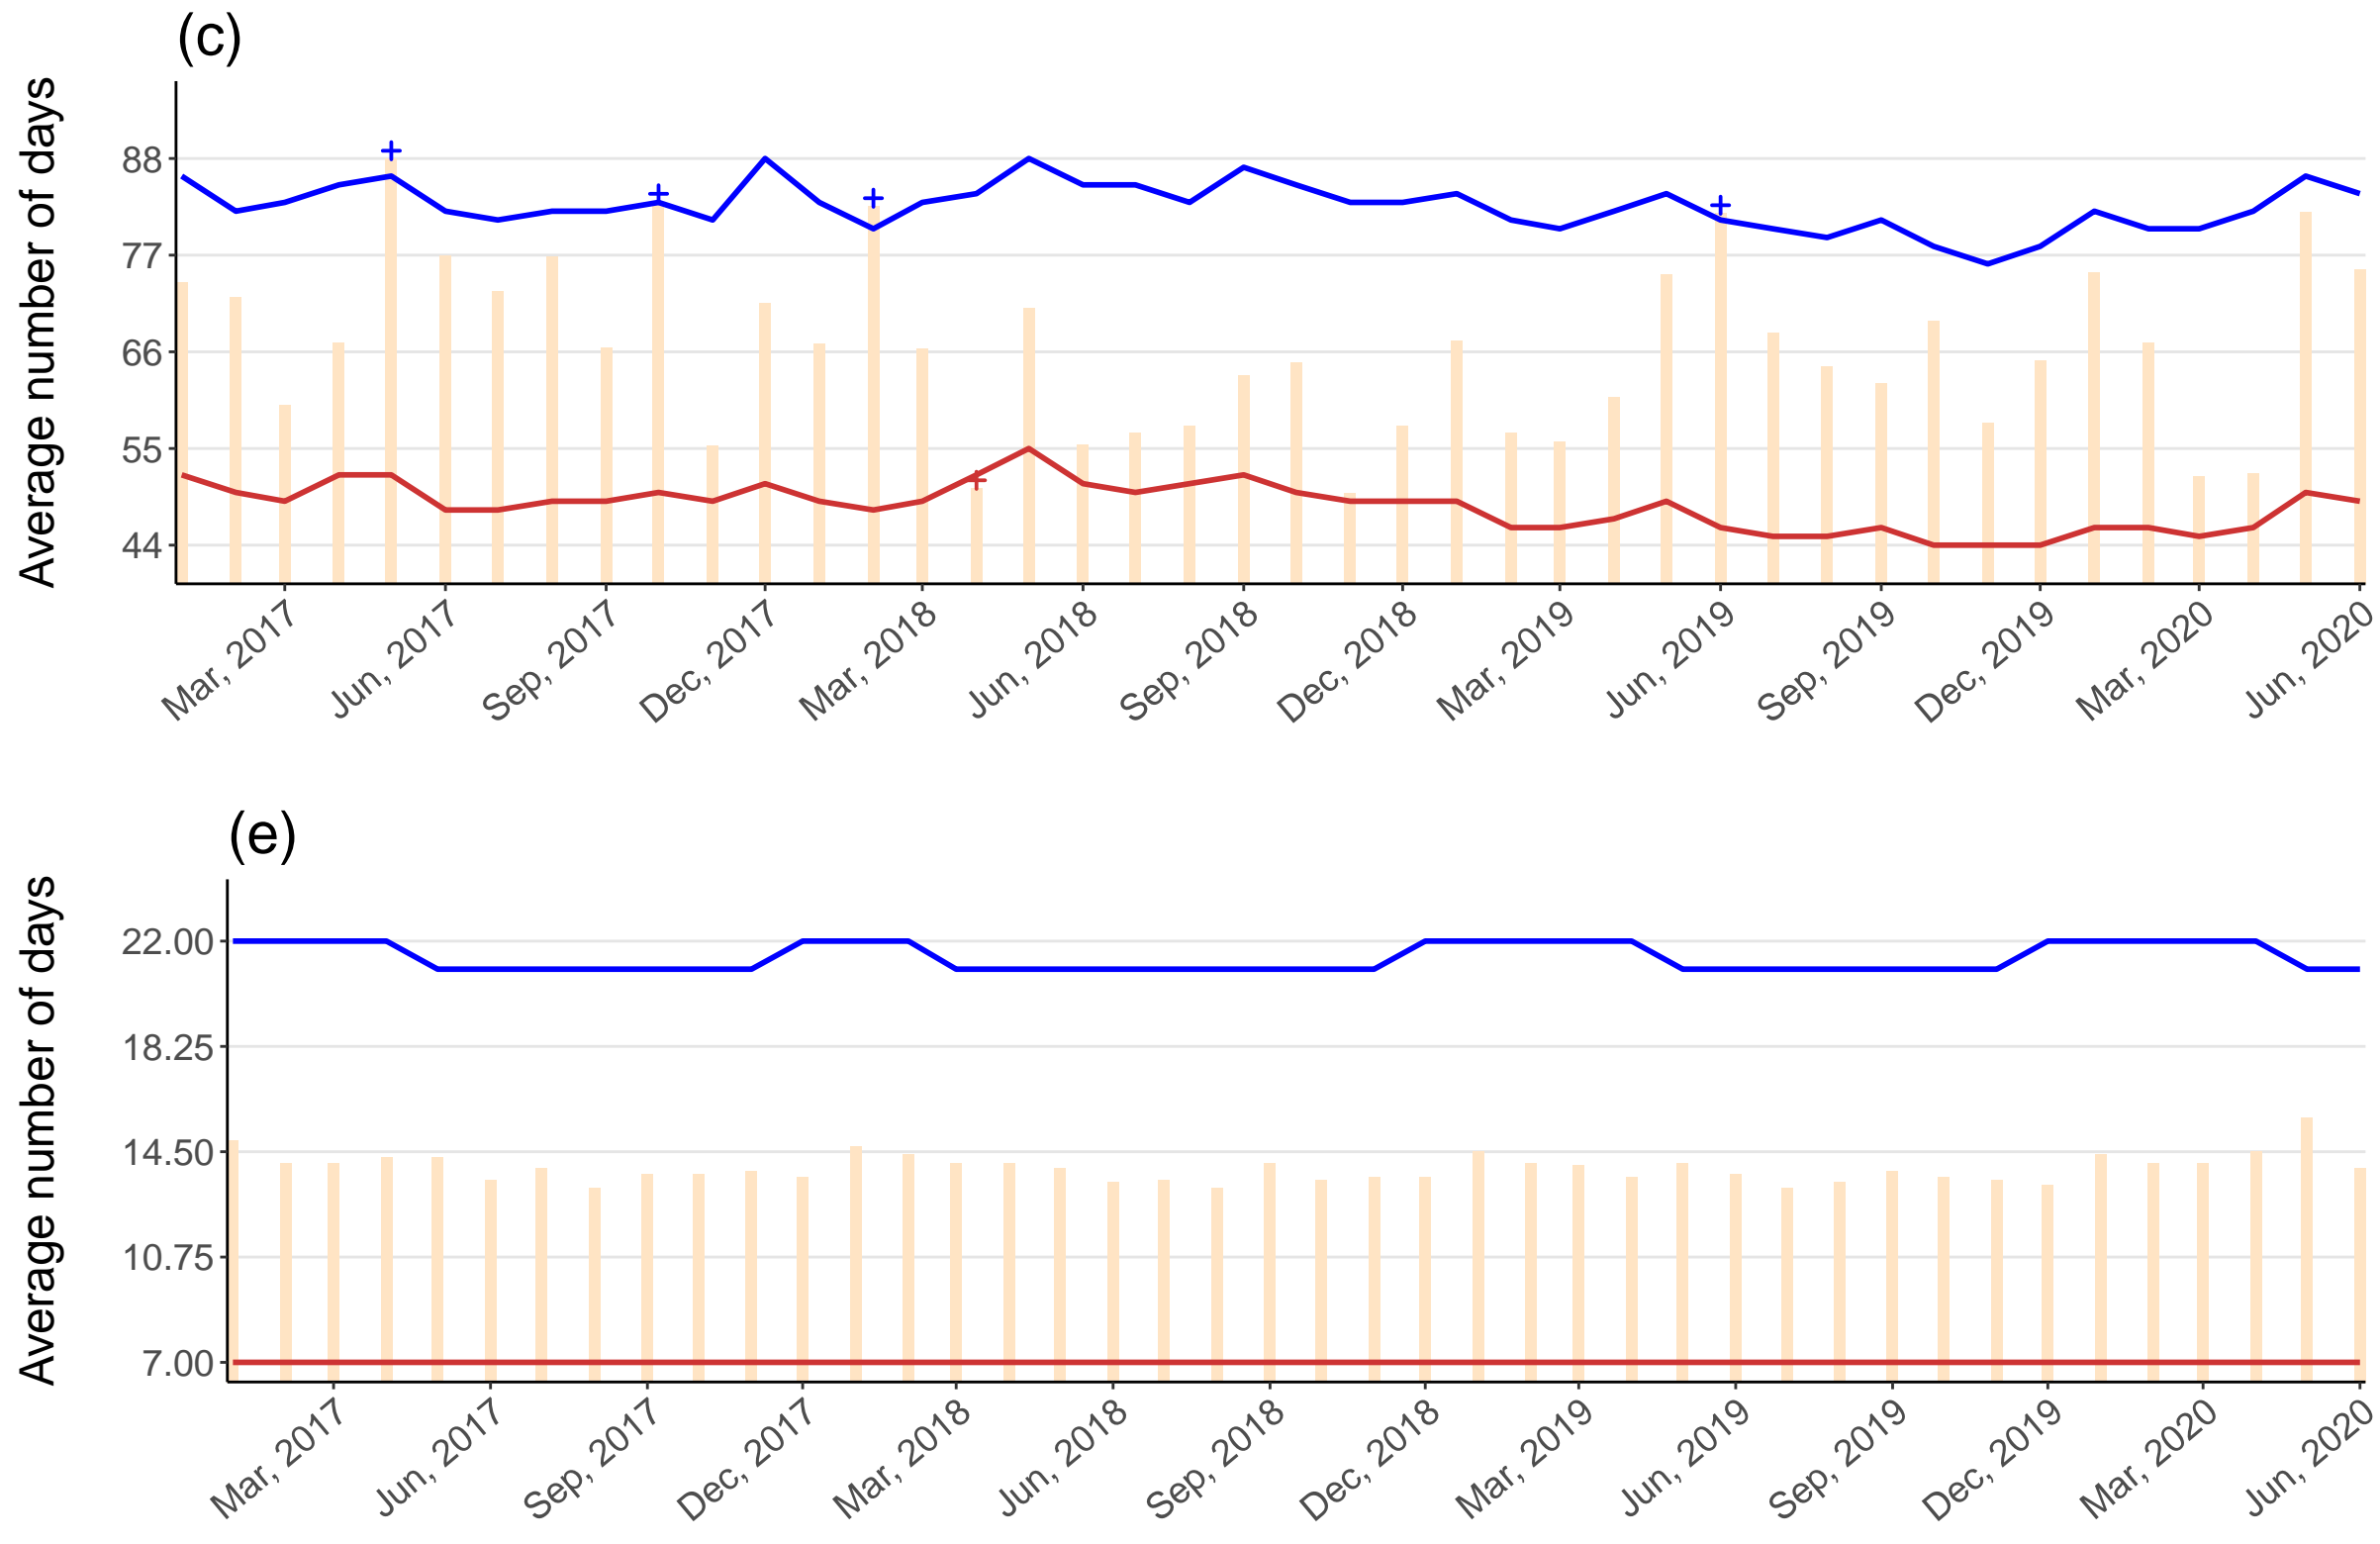

Mie

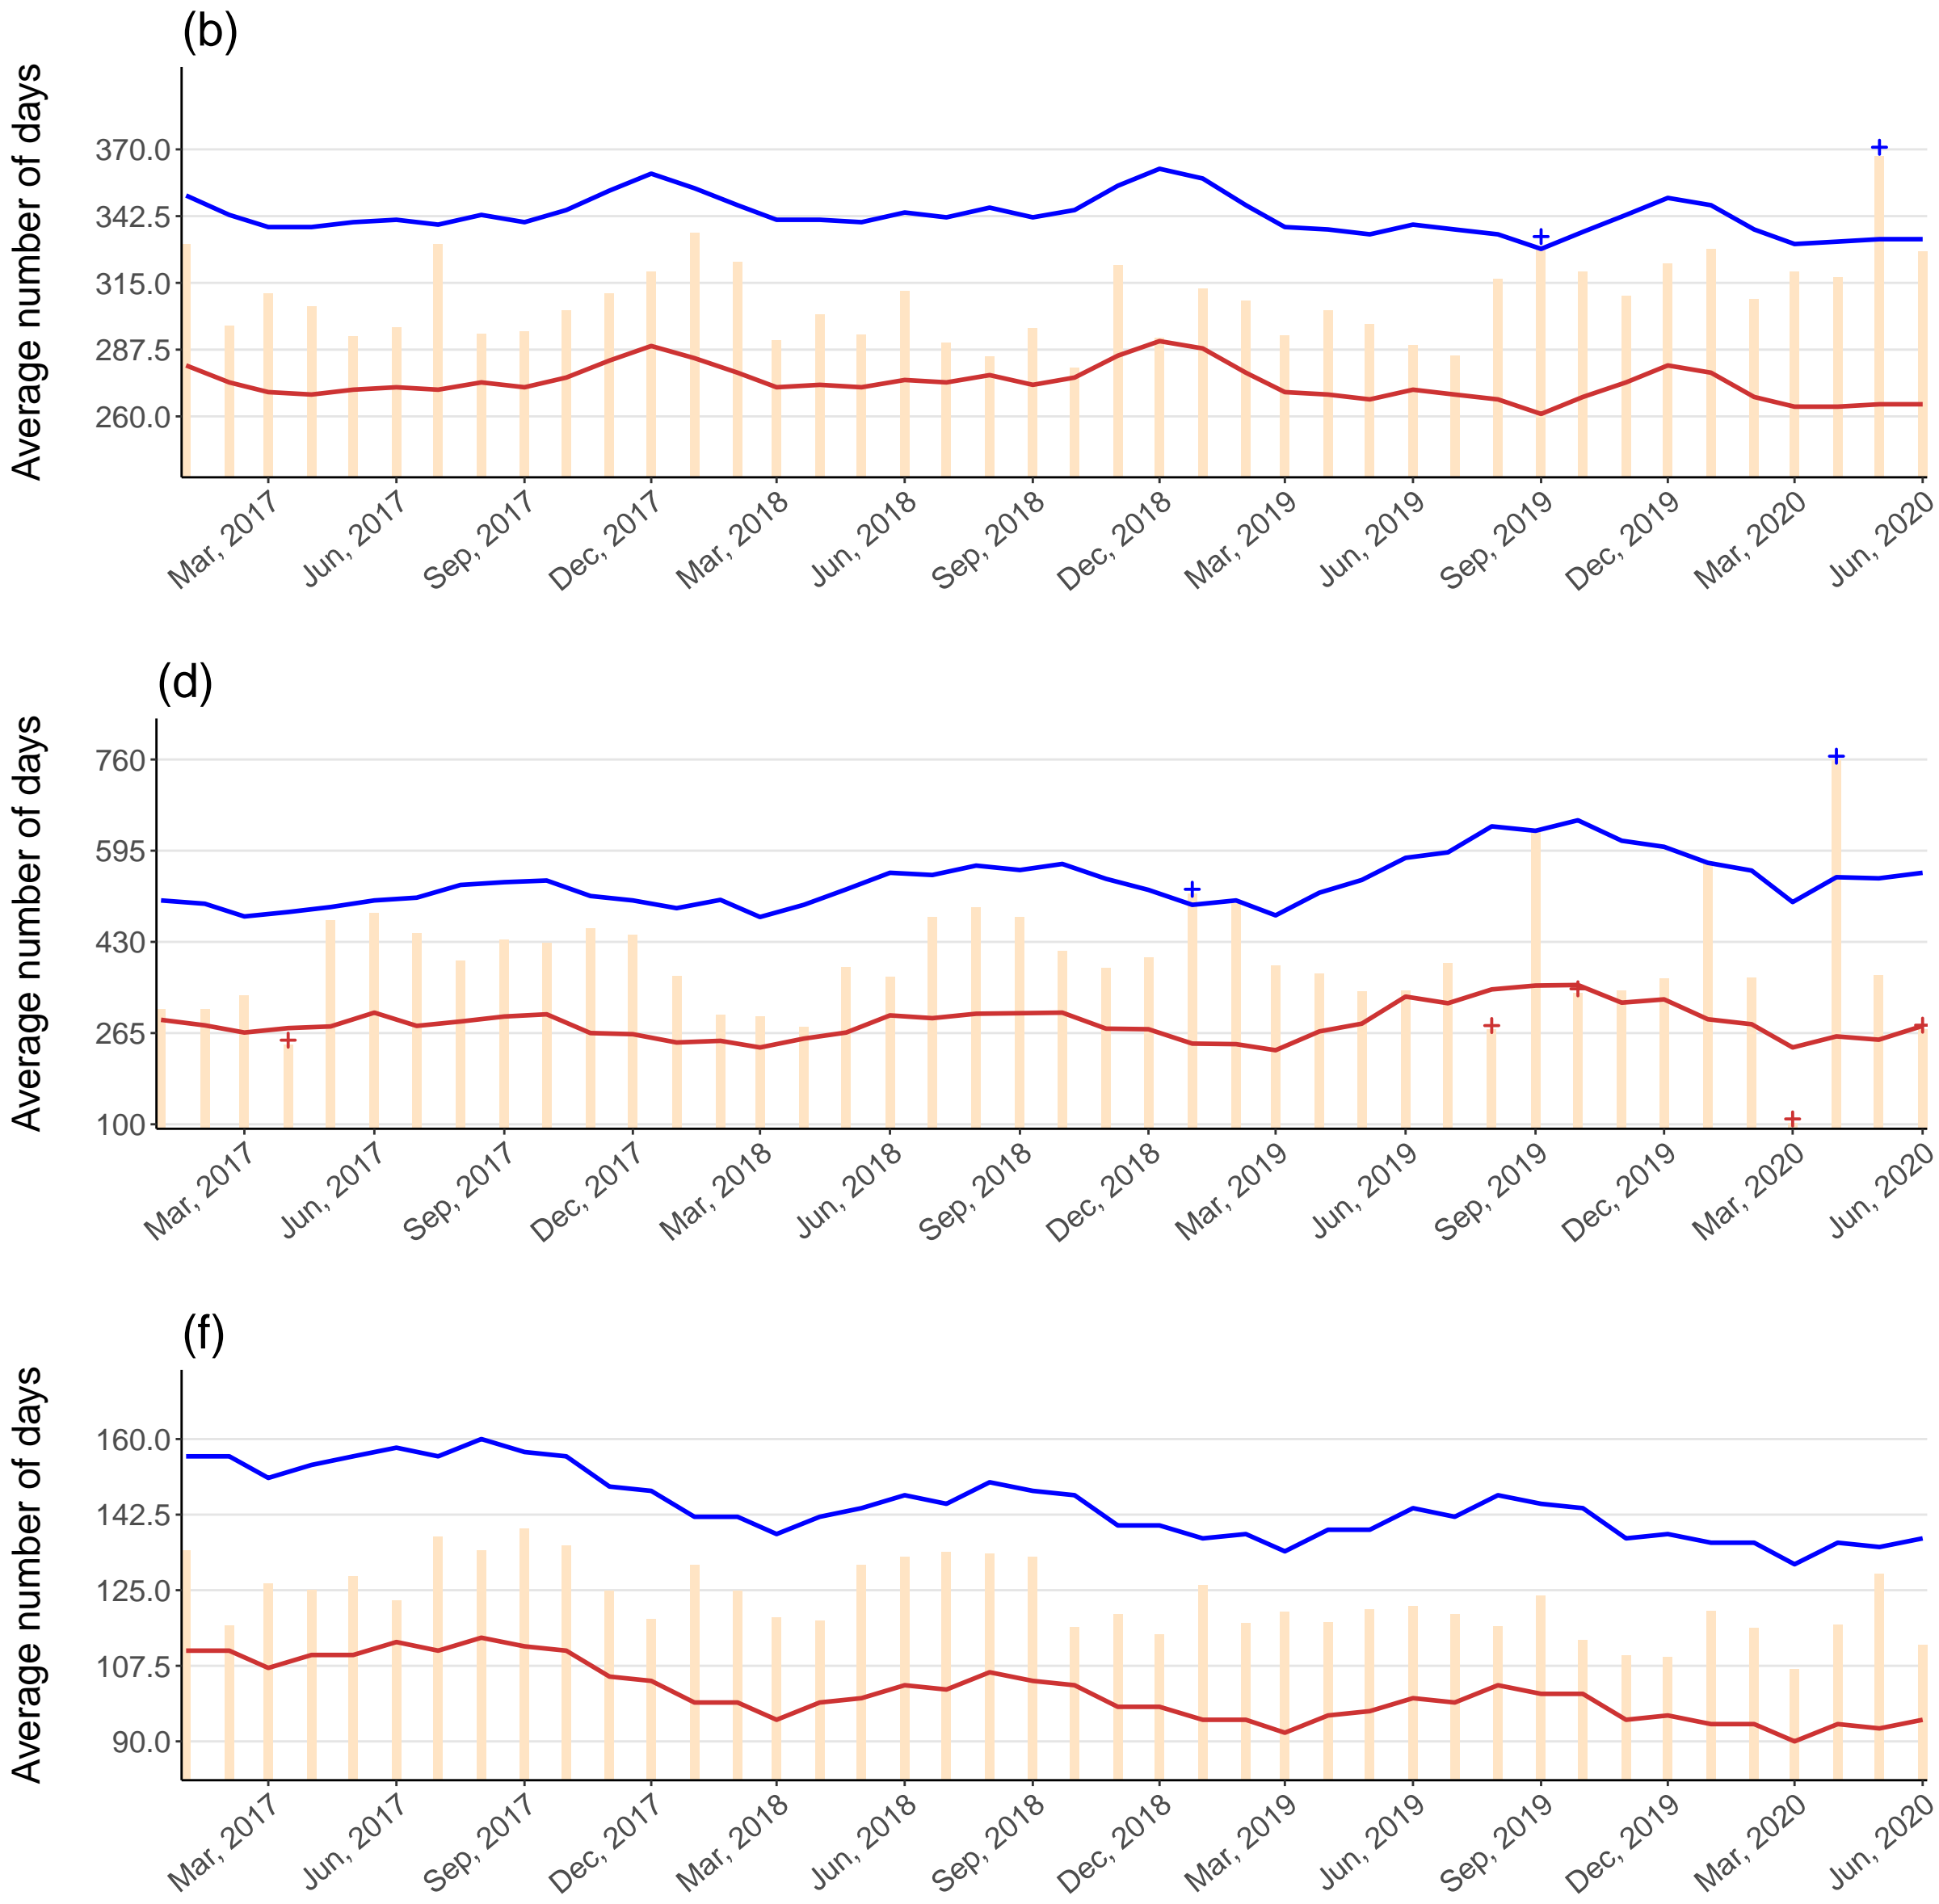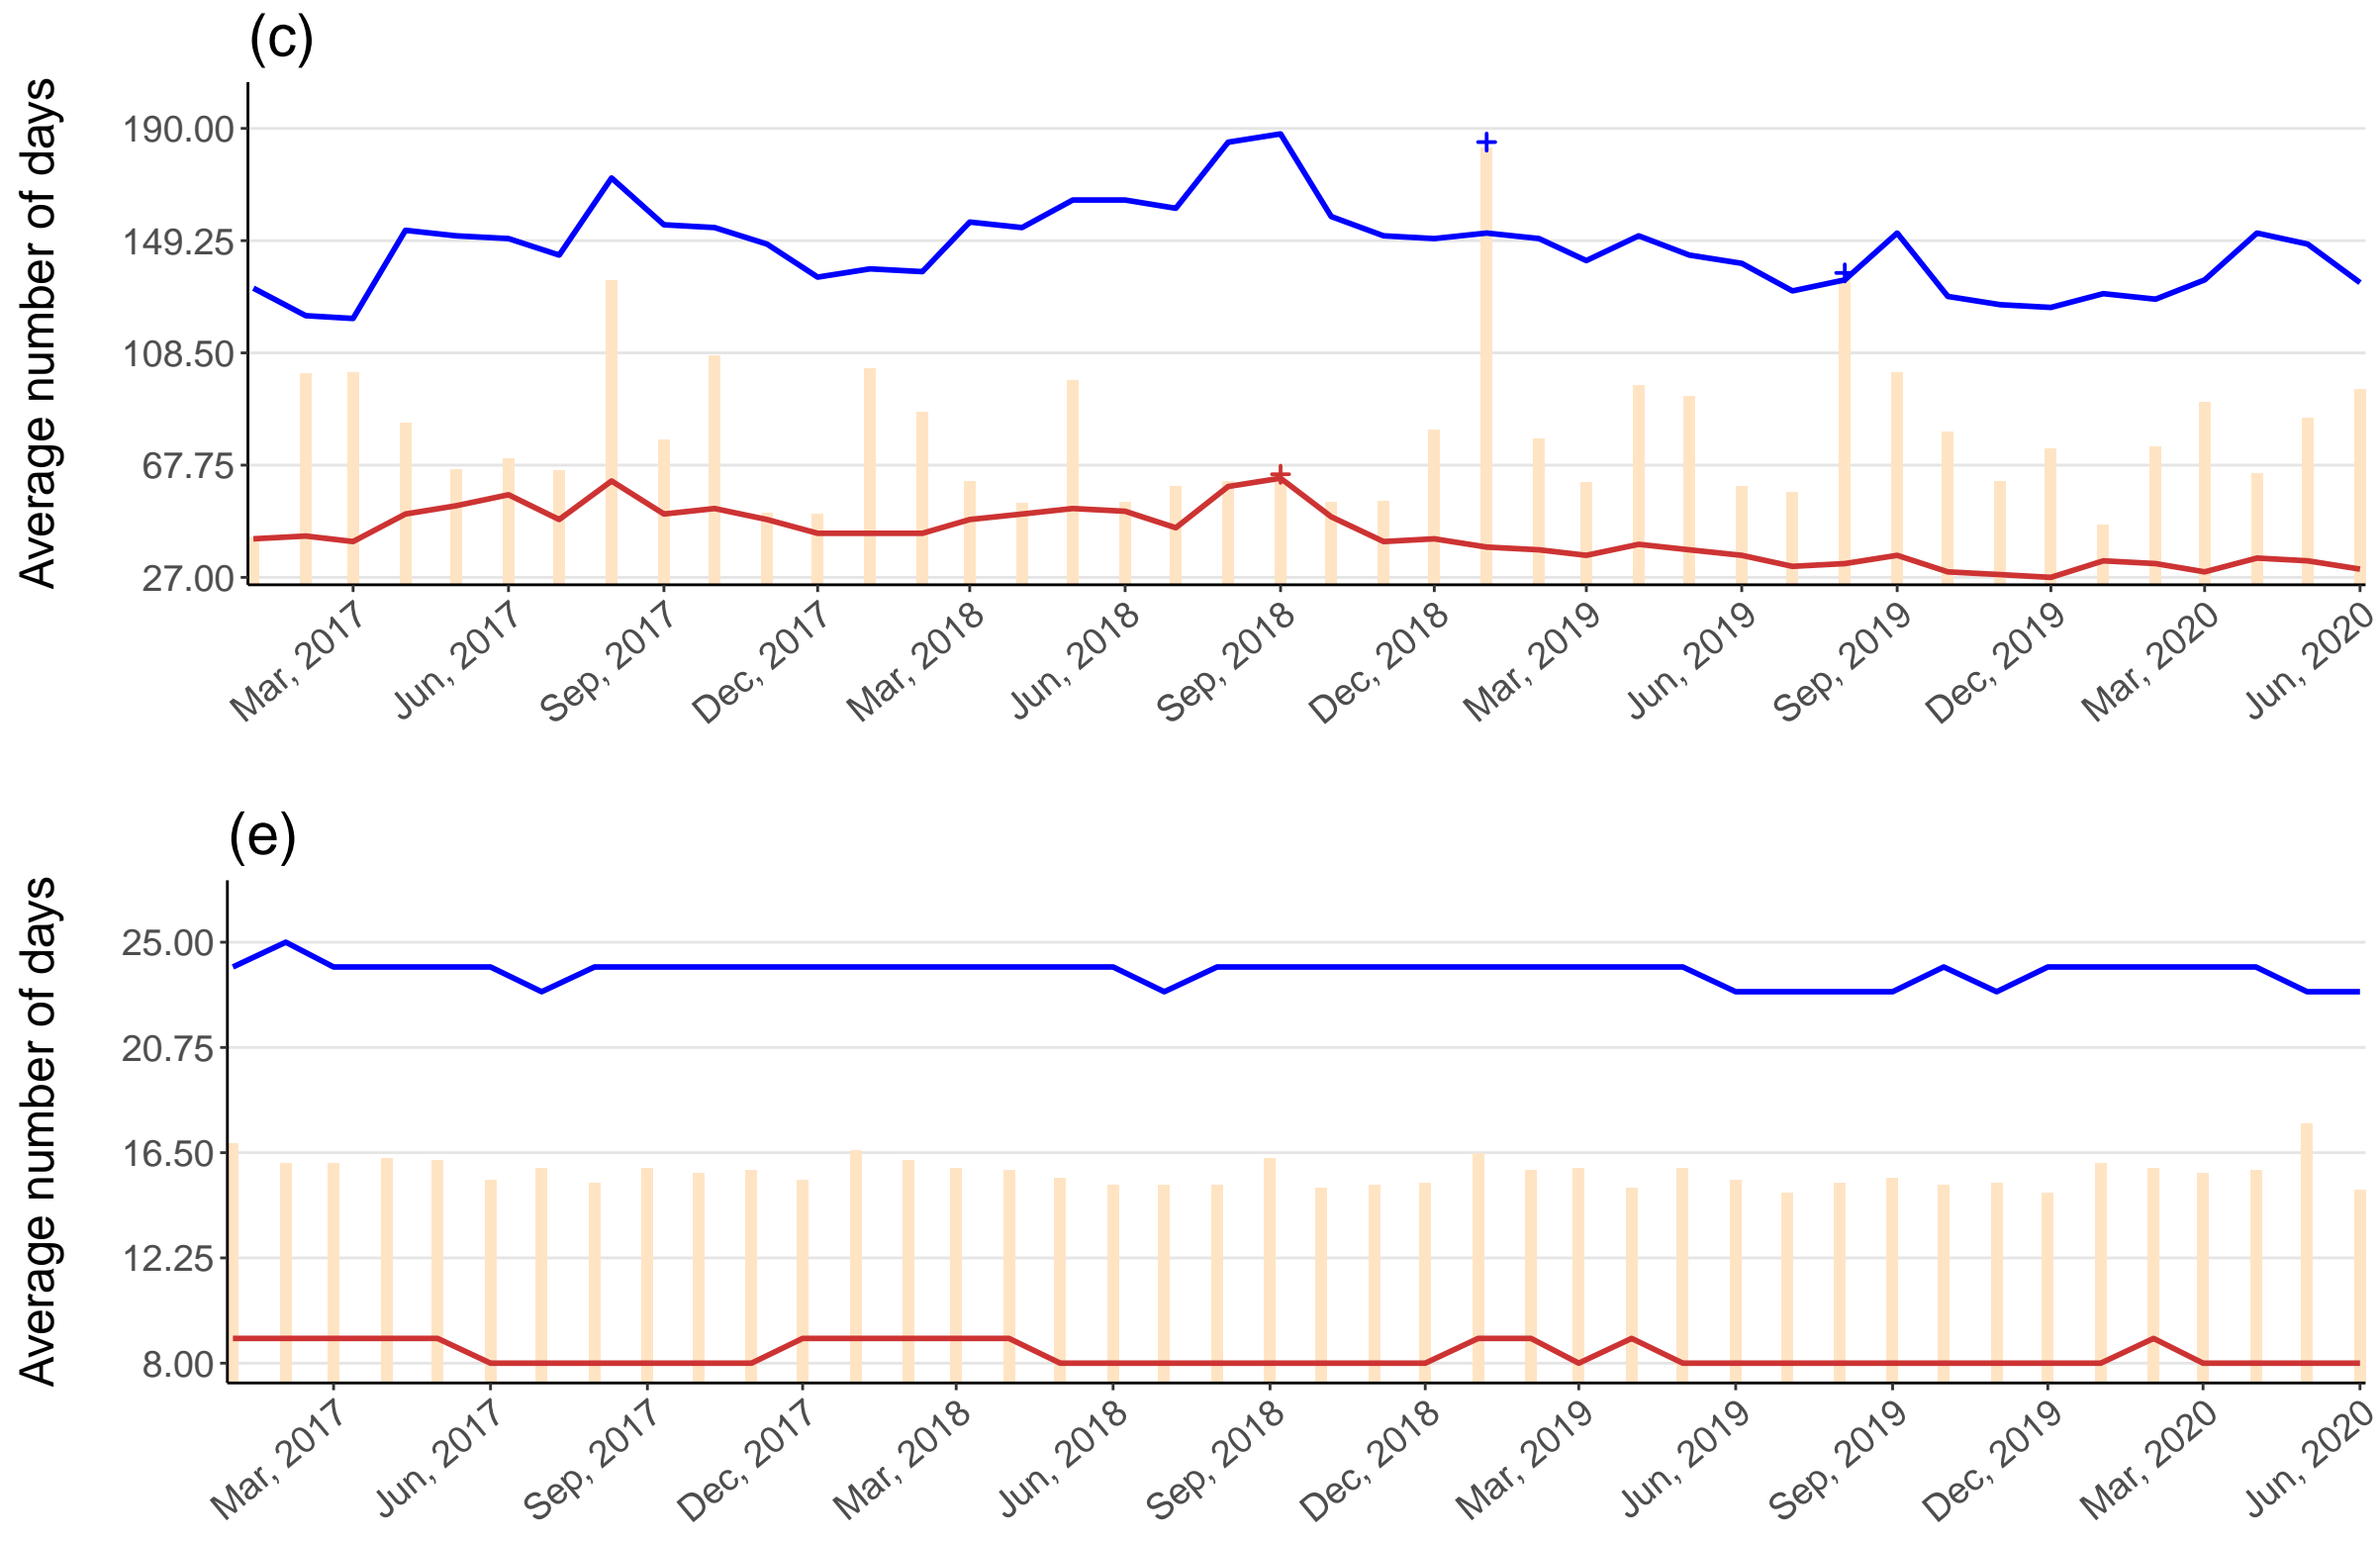



# Shiga

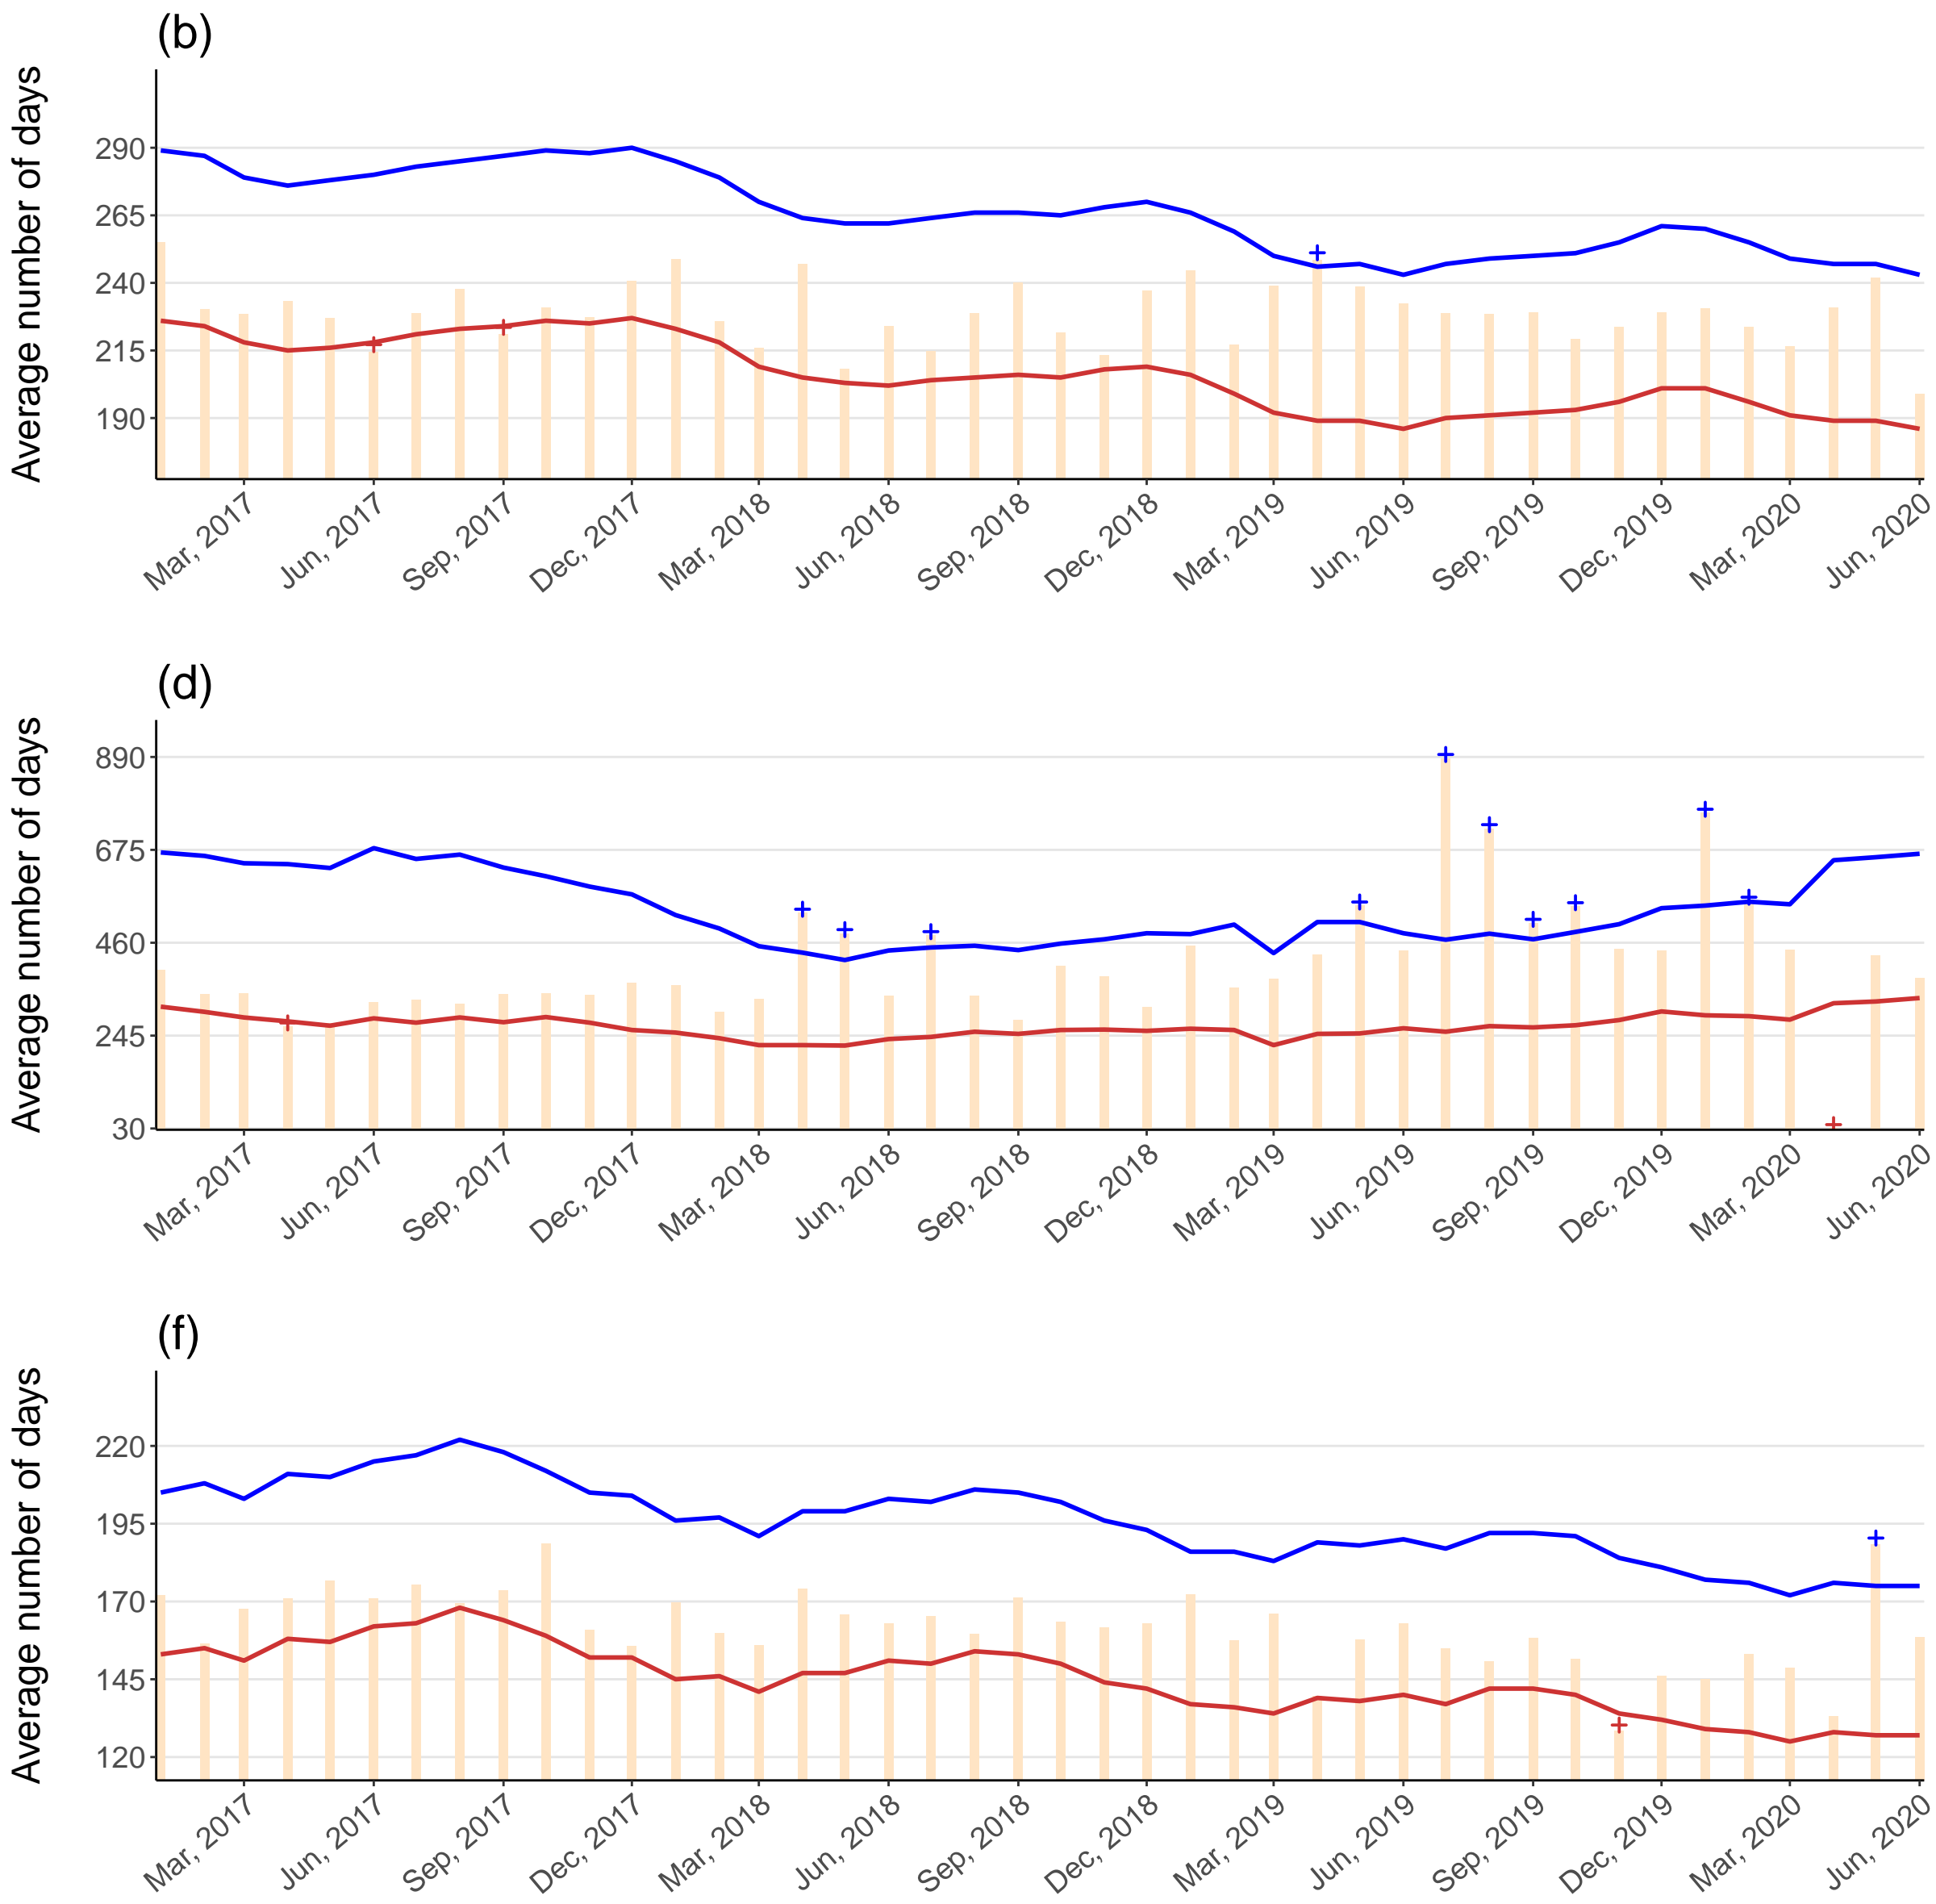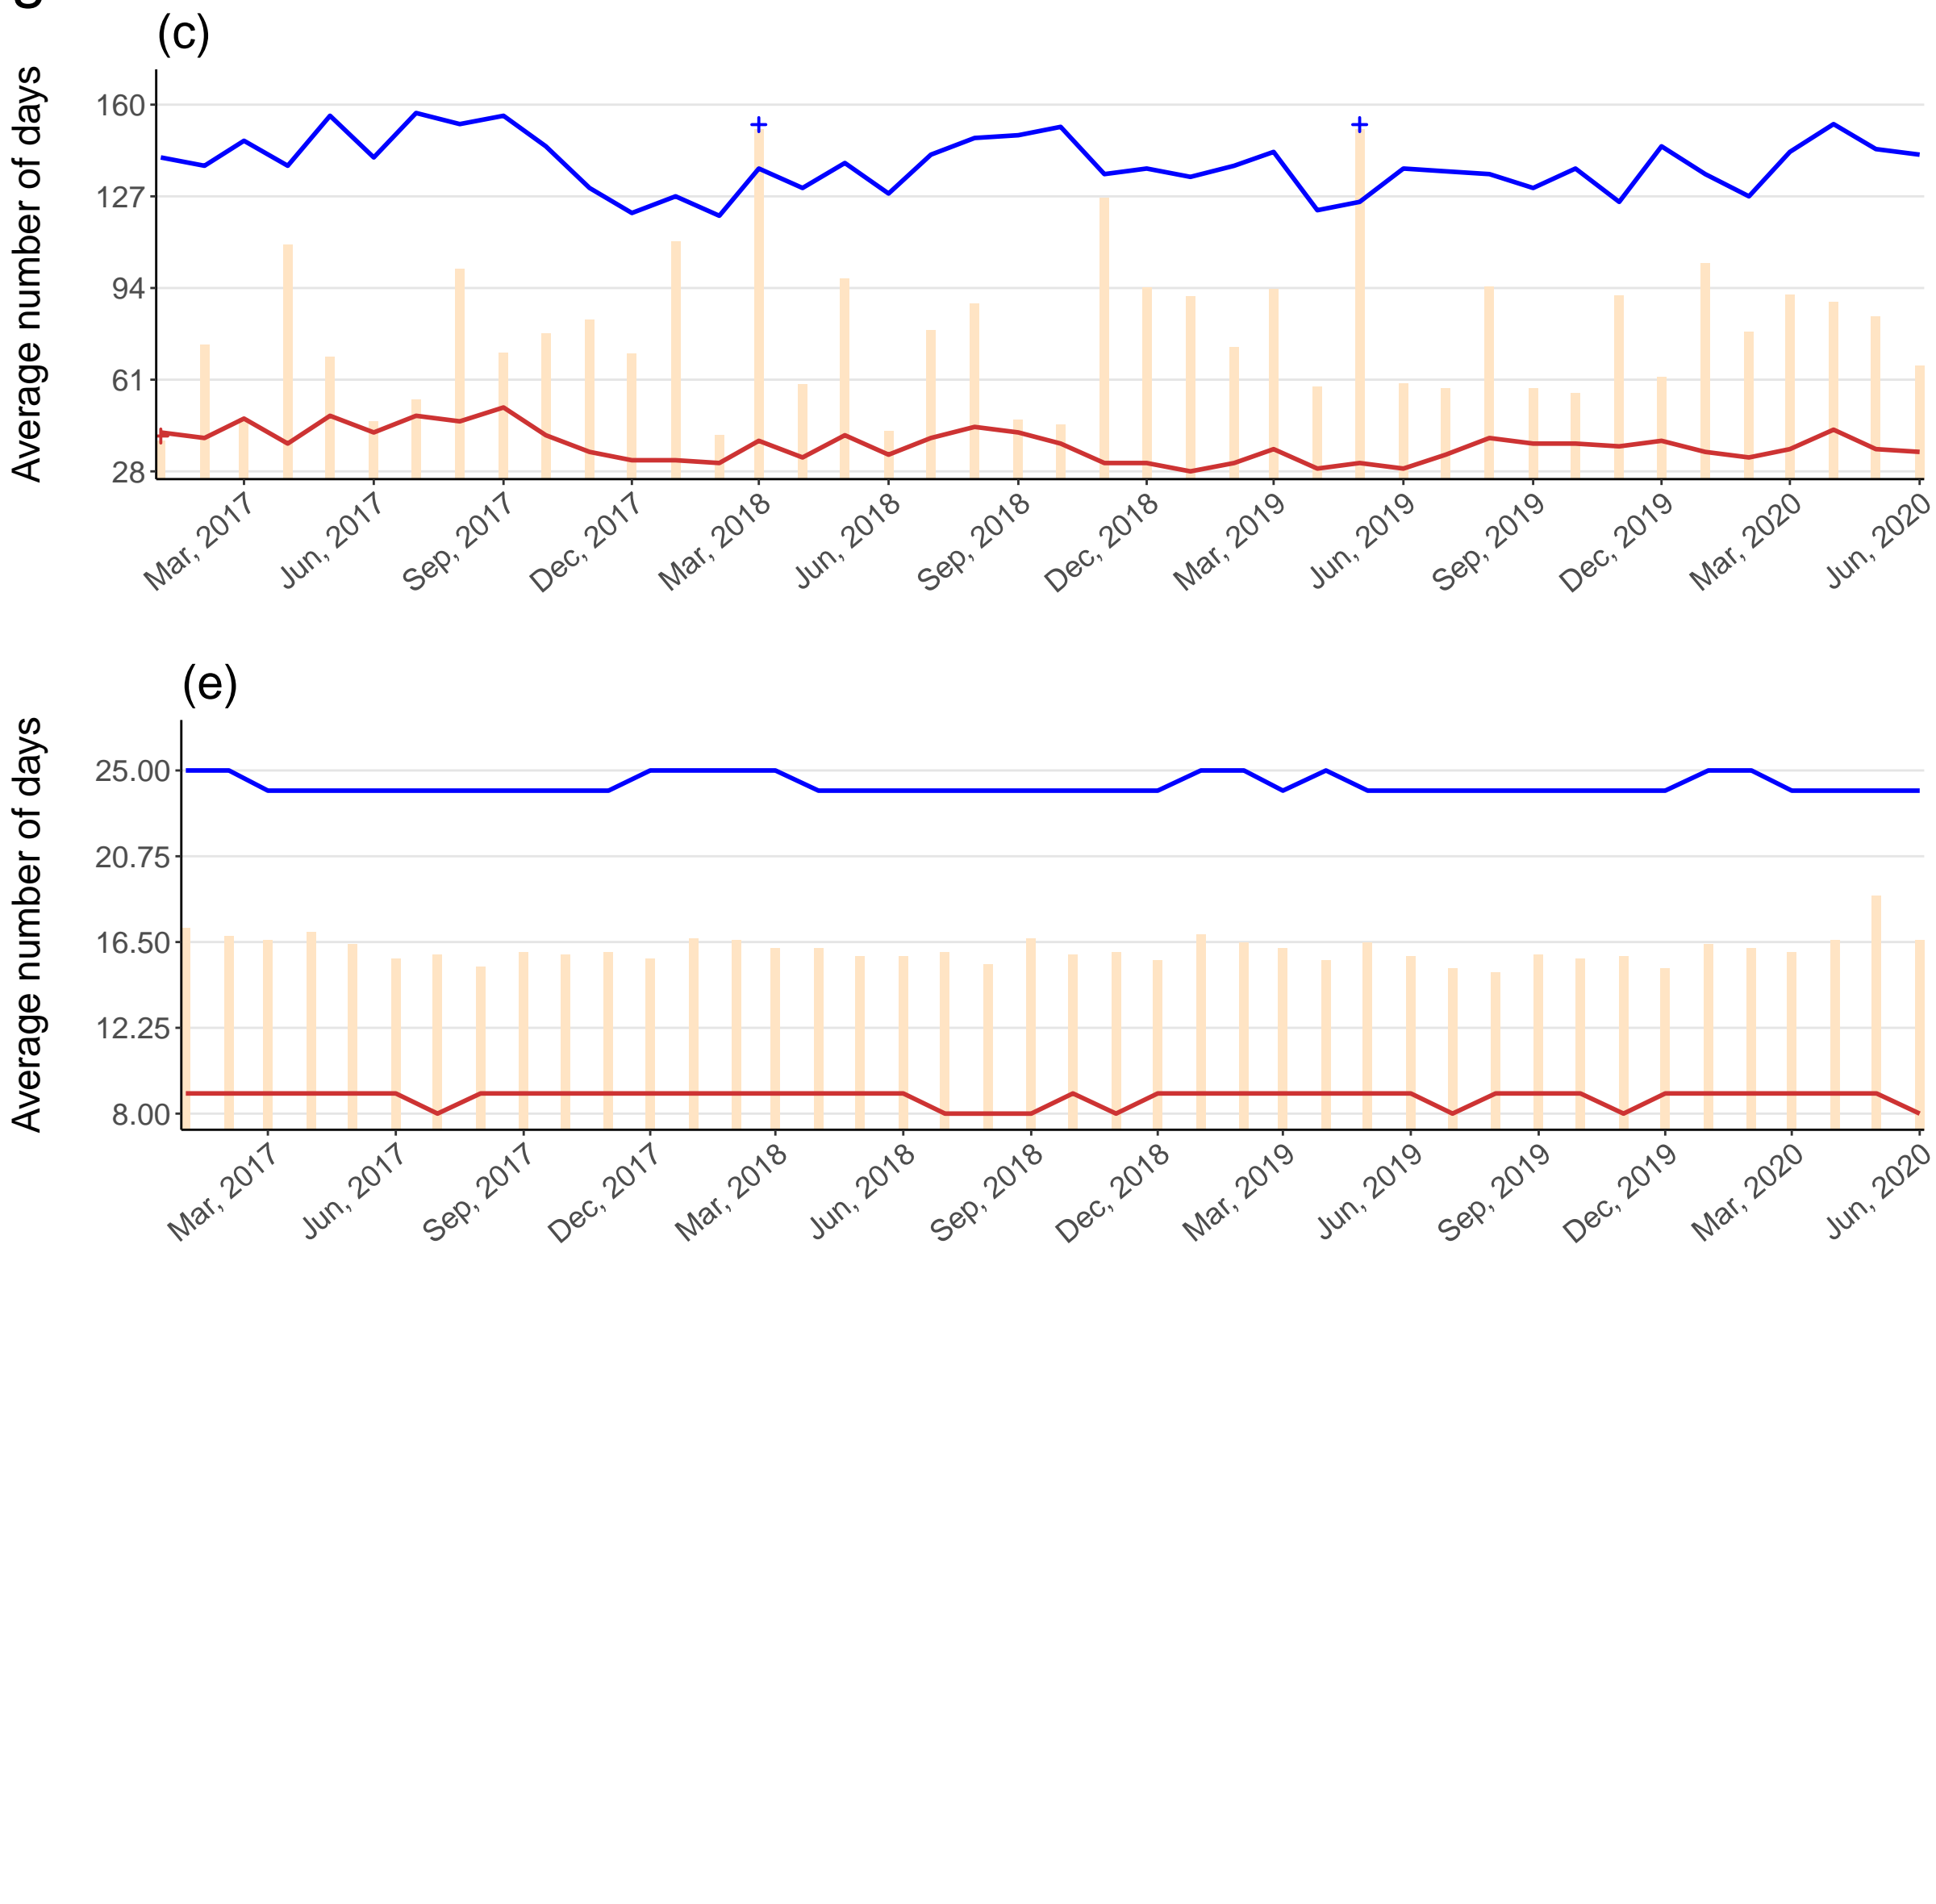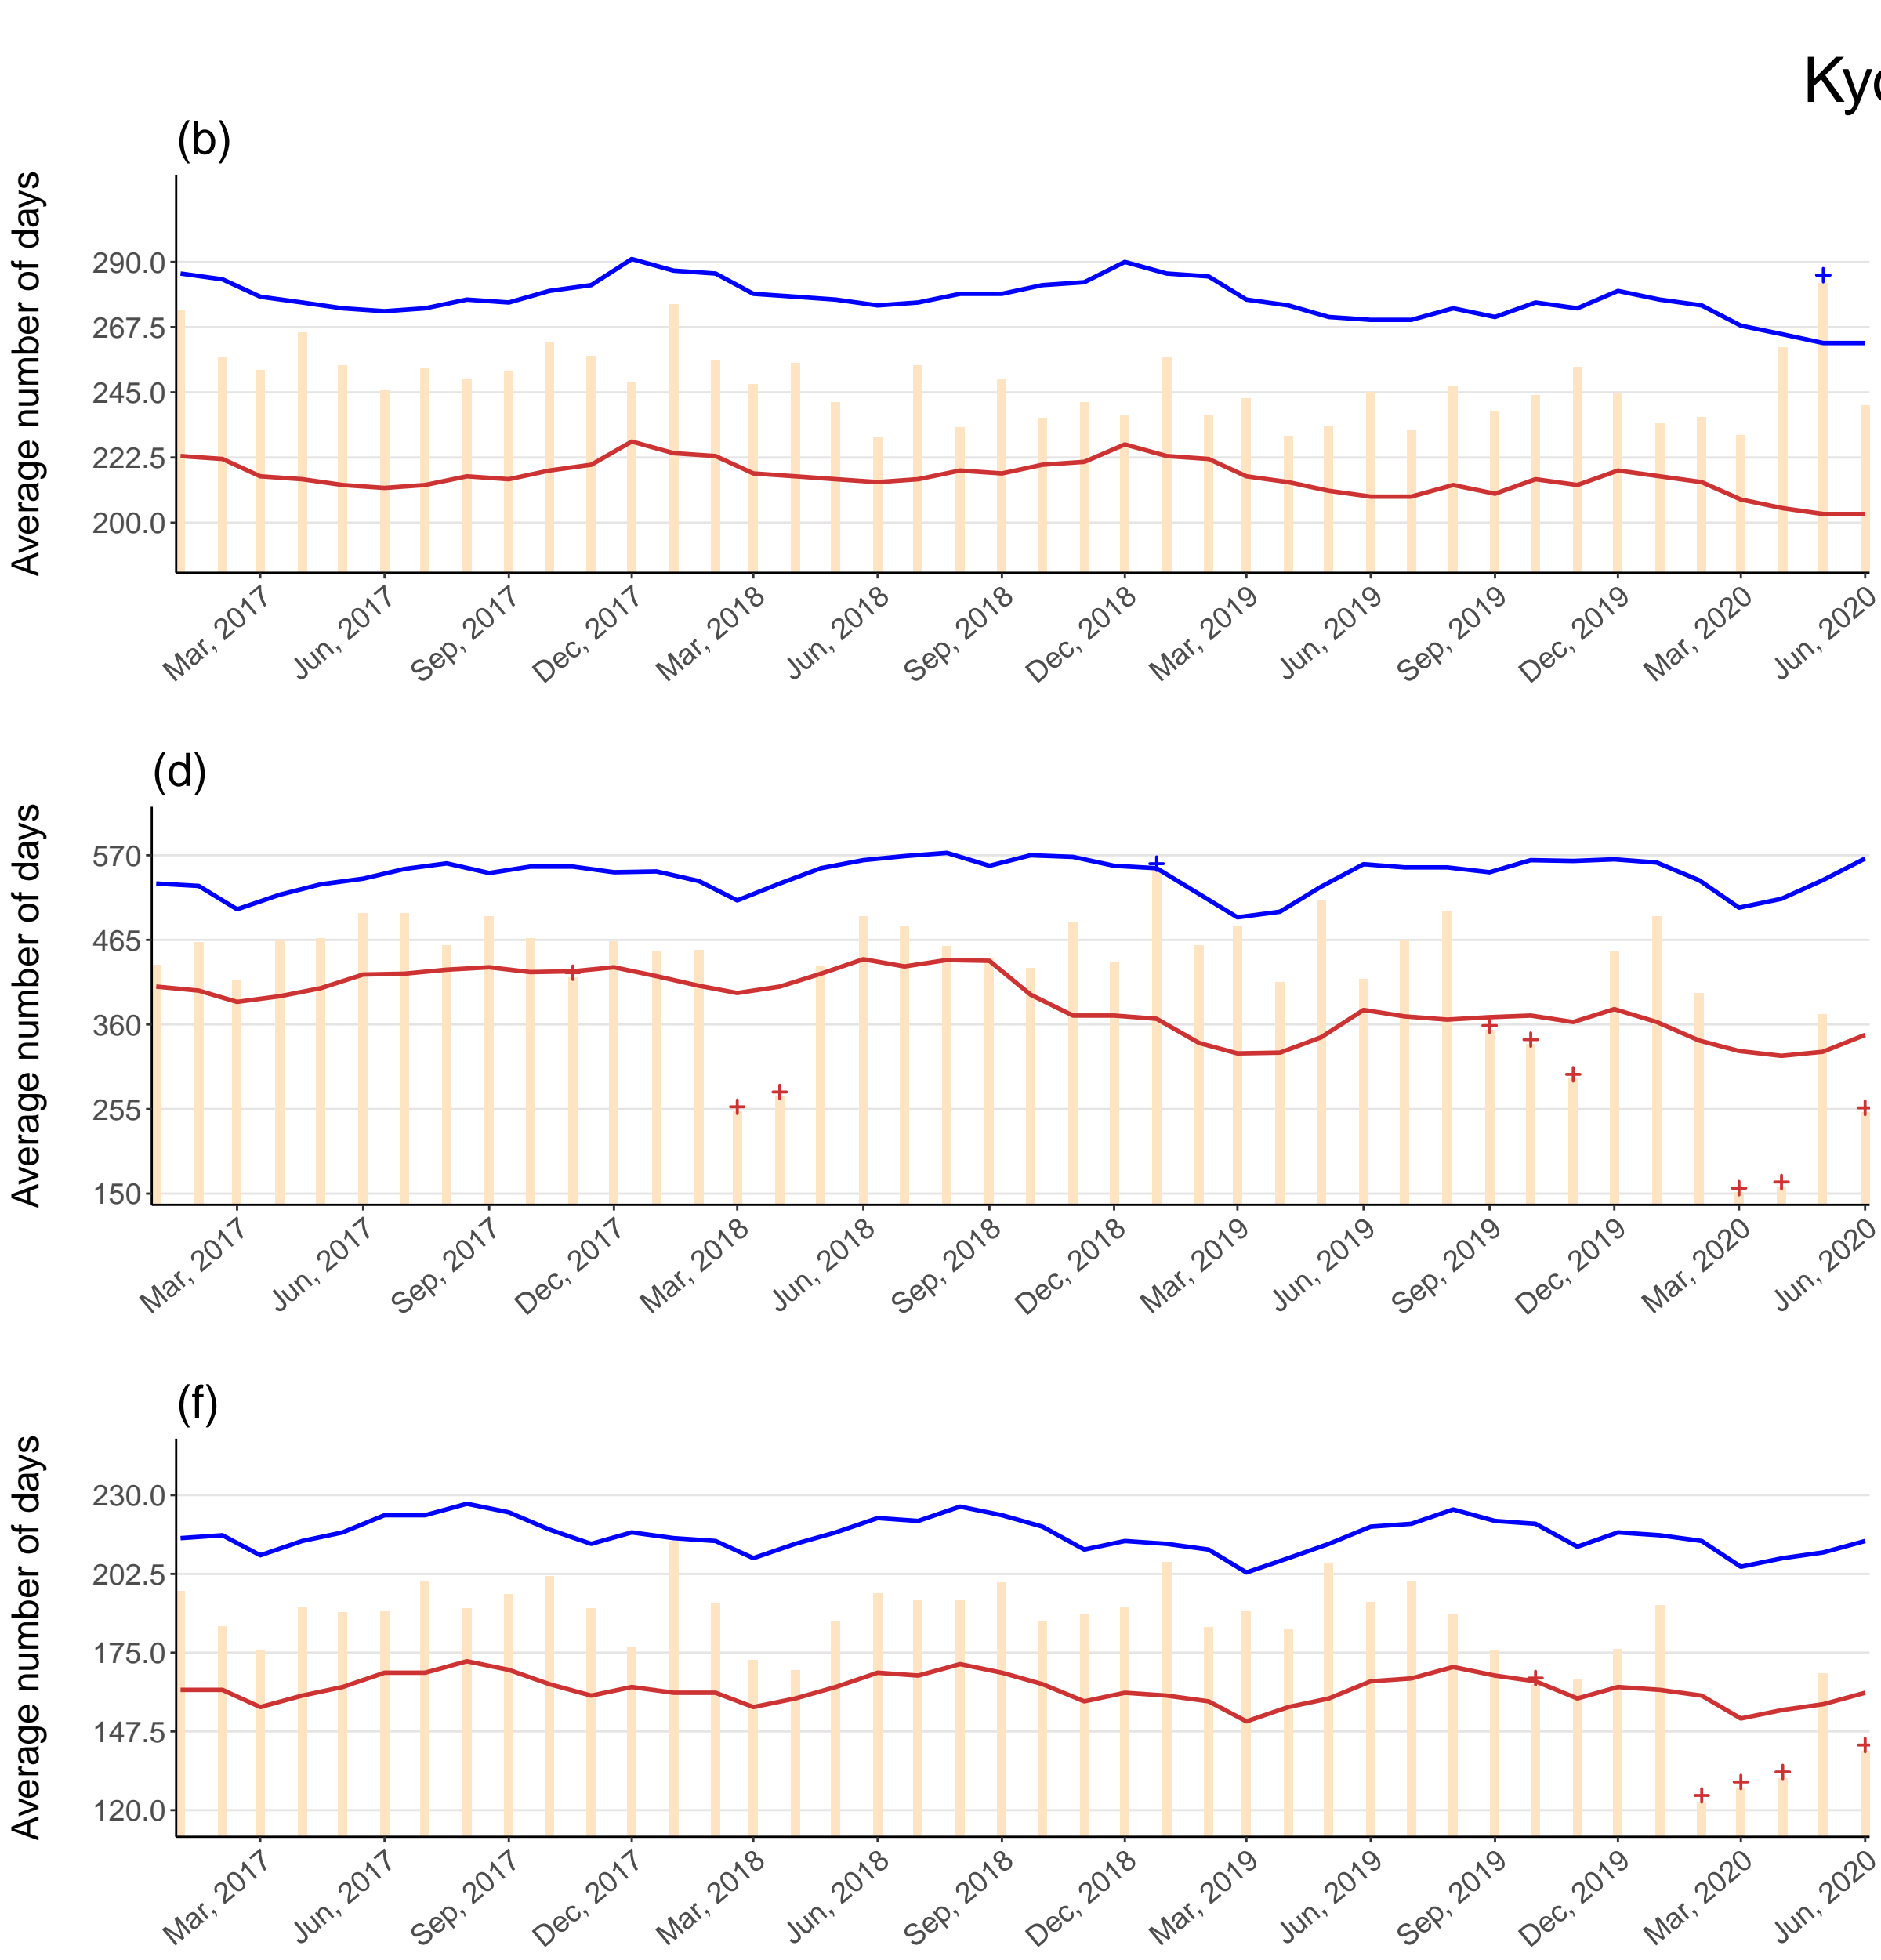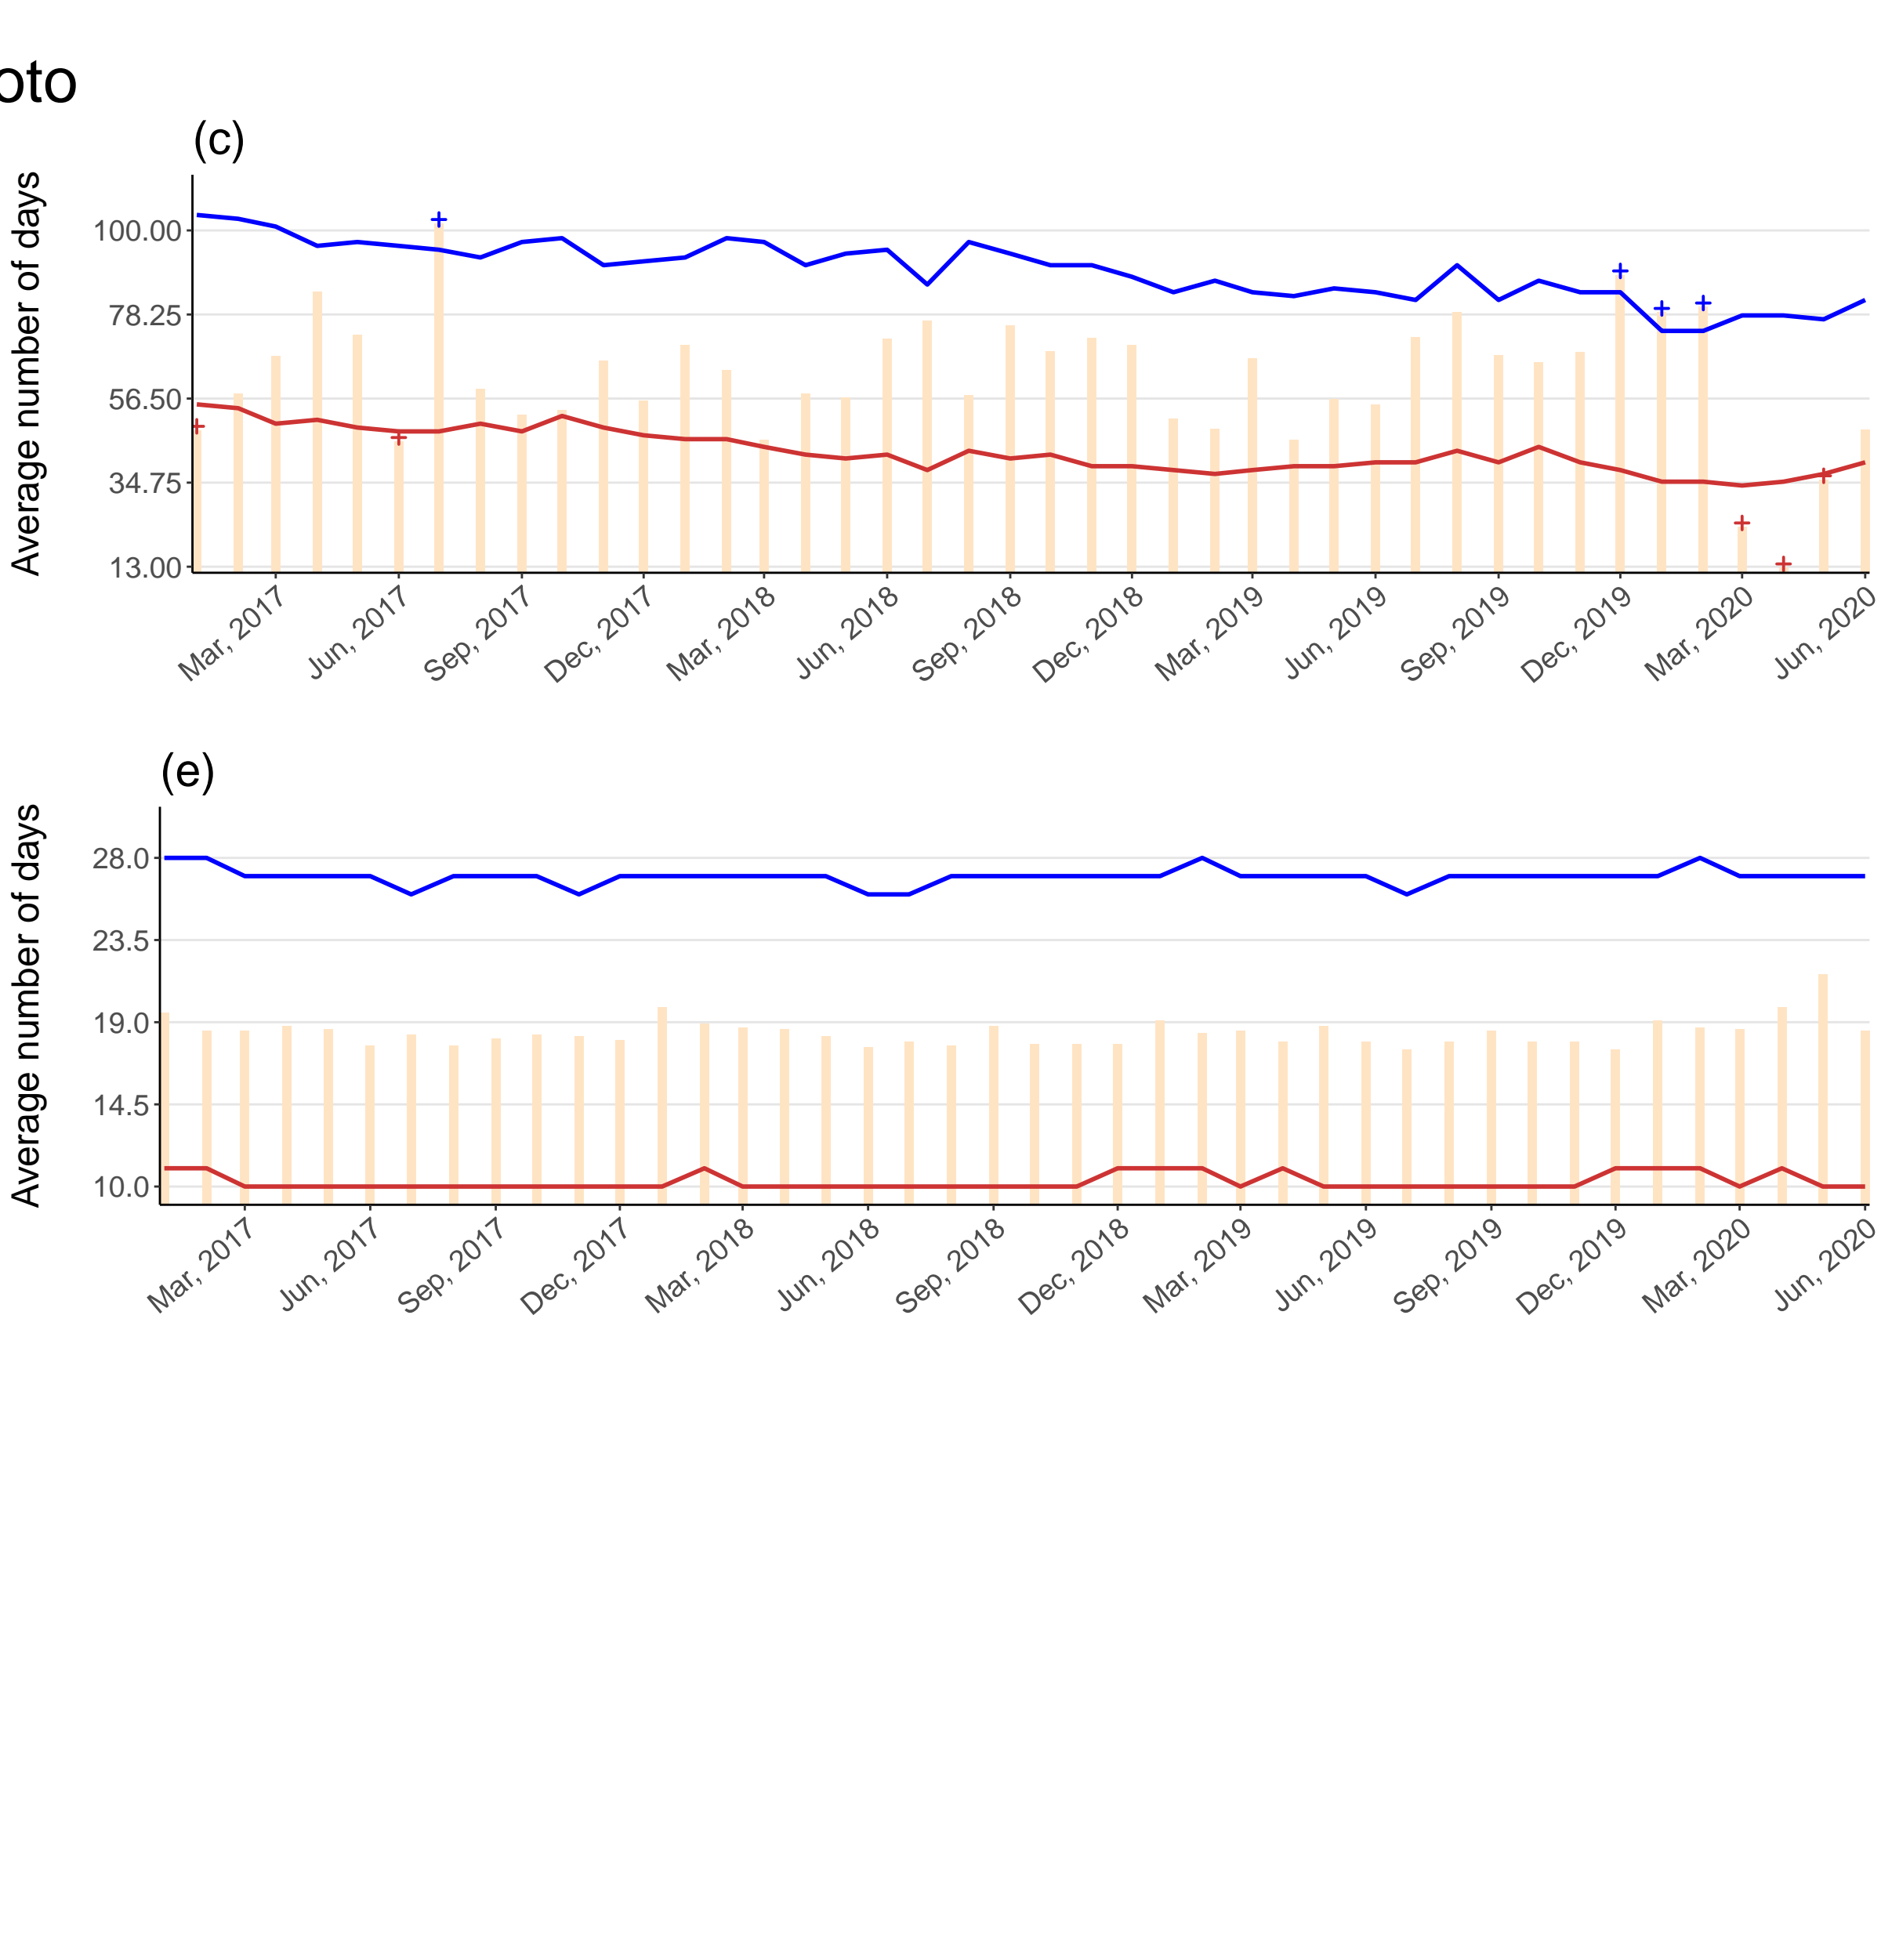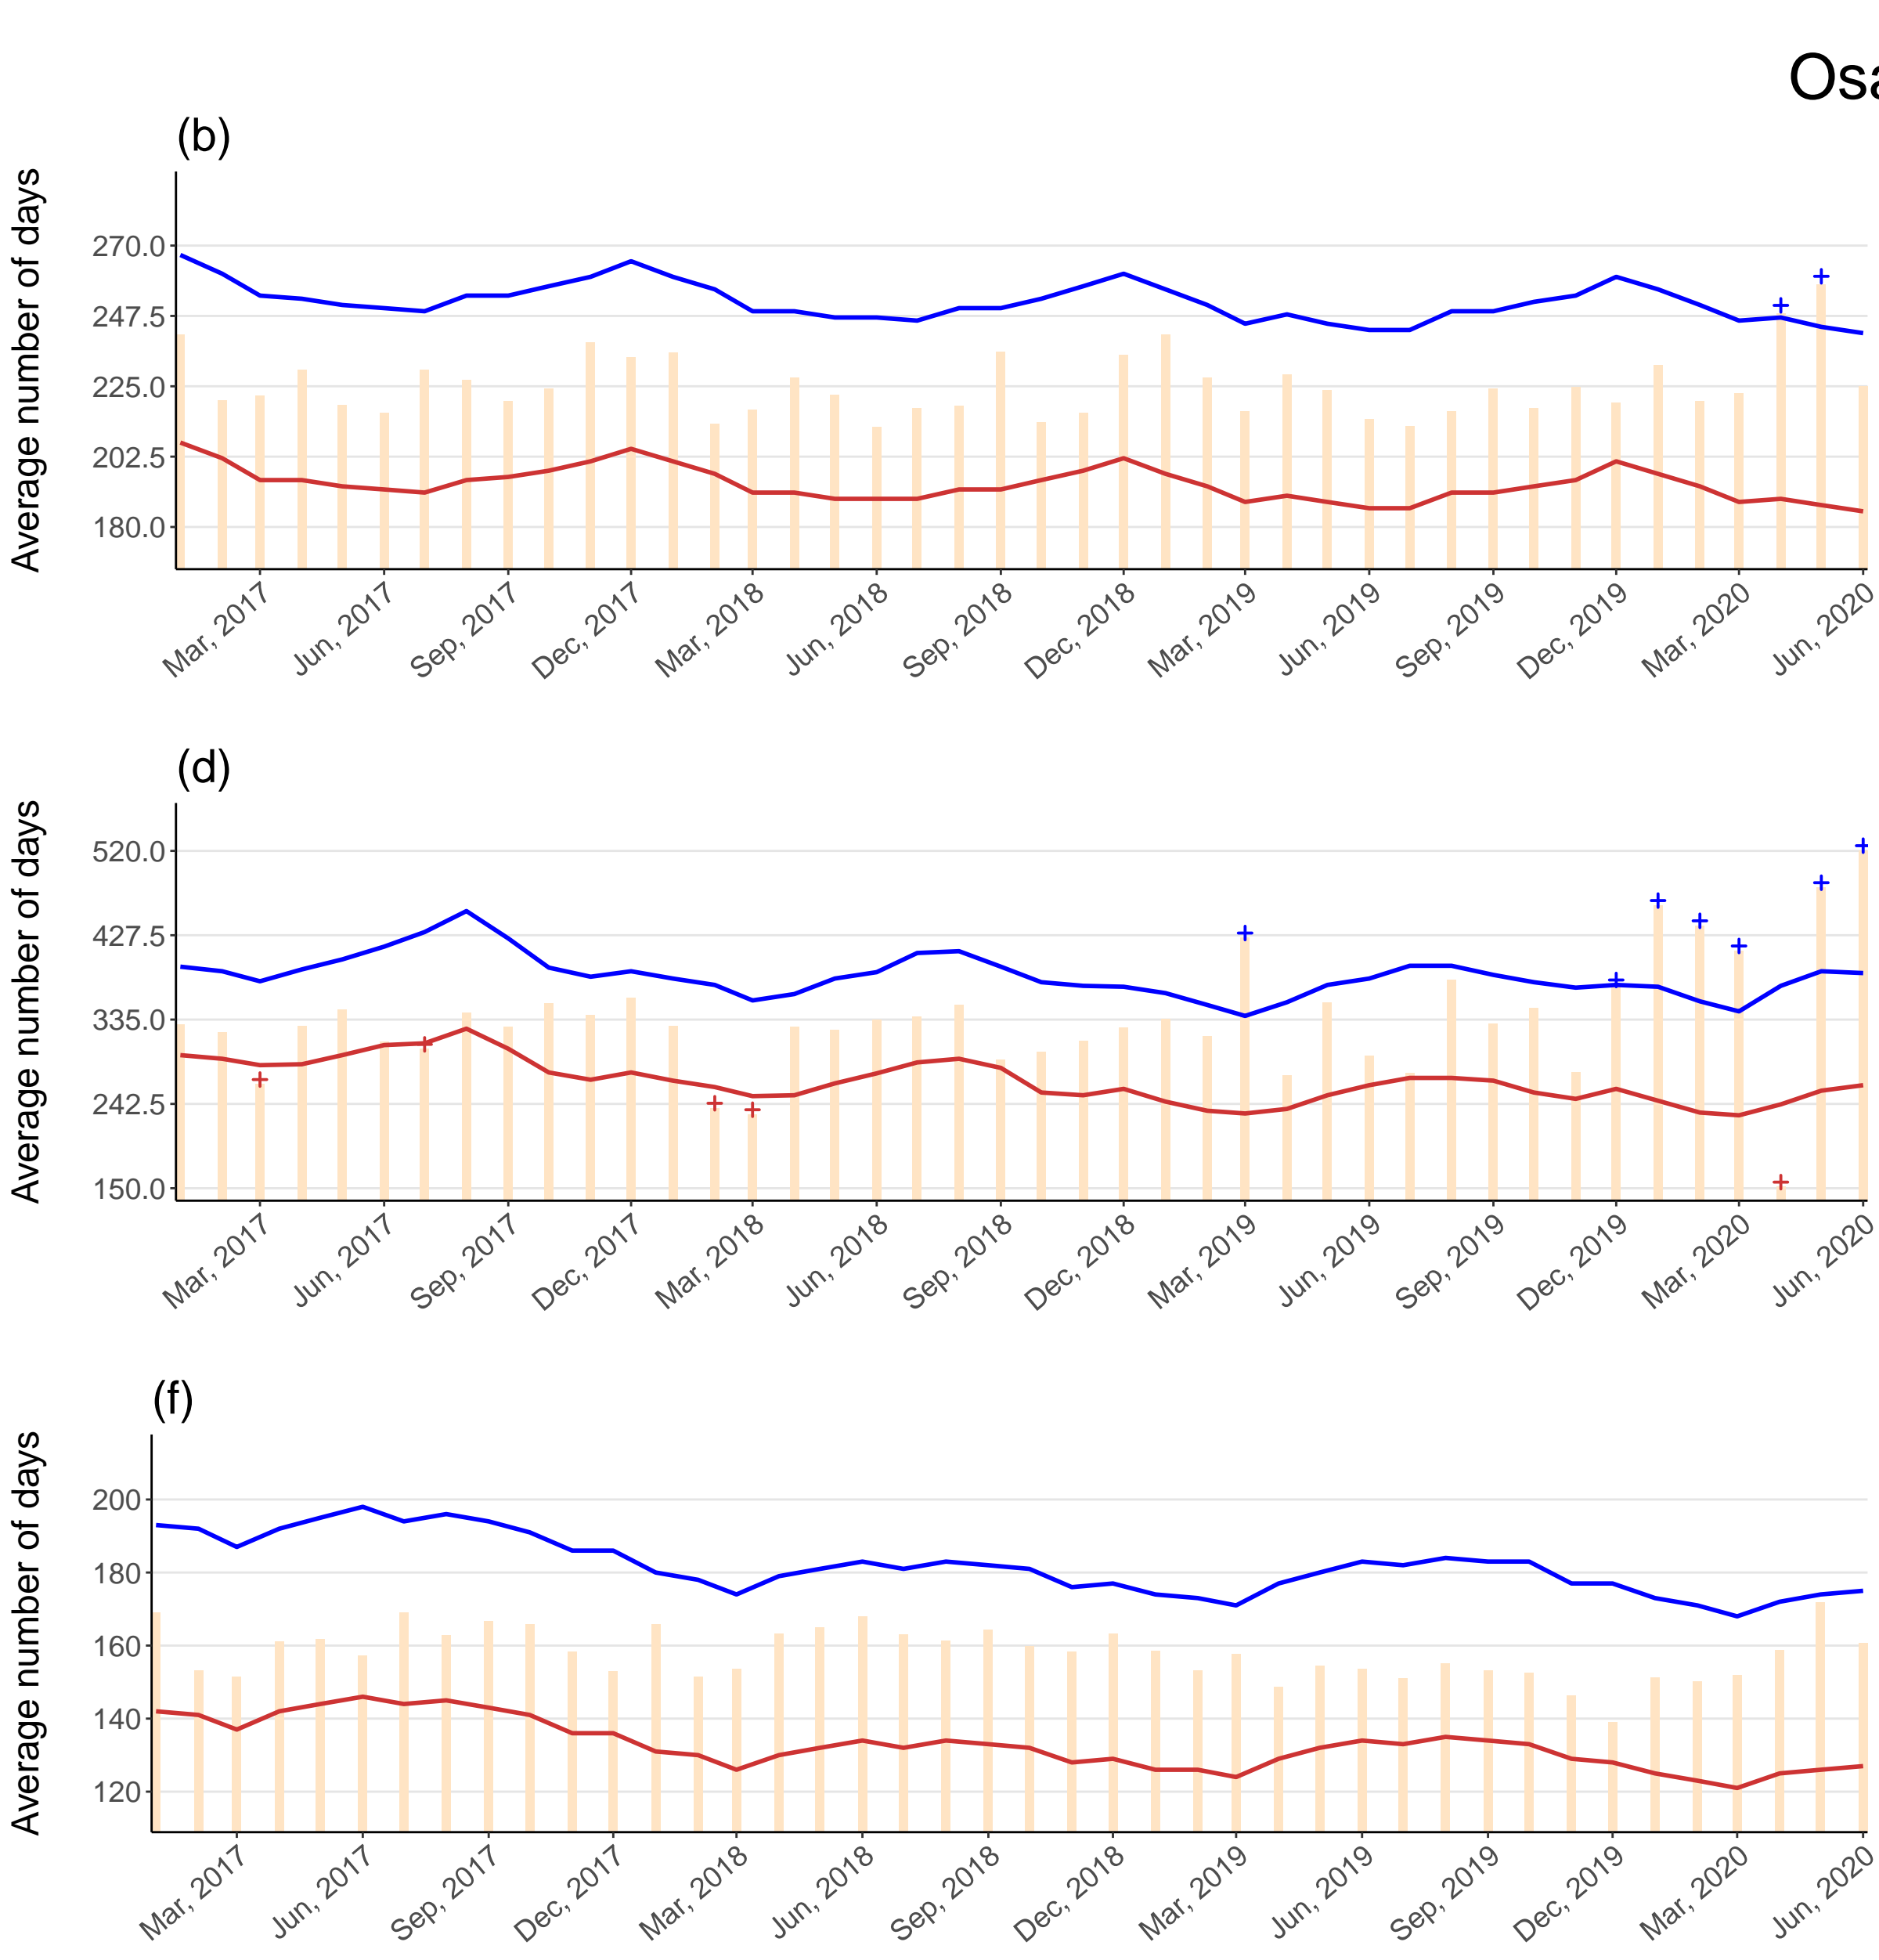

# Kyoto

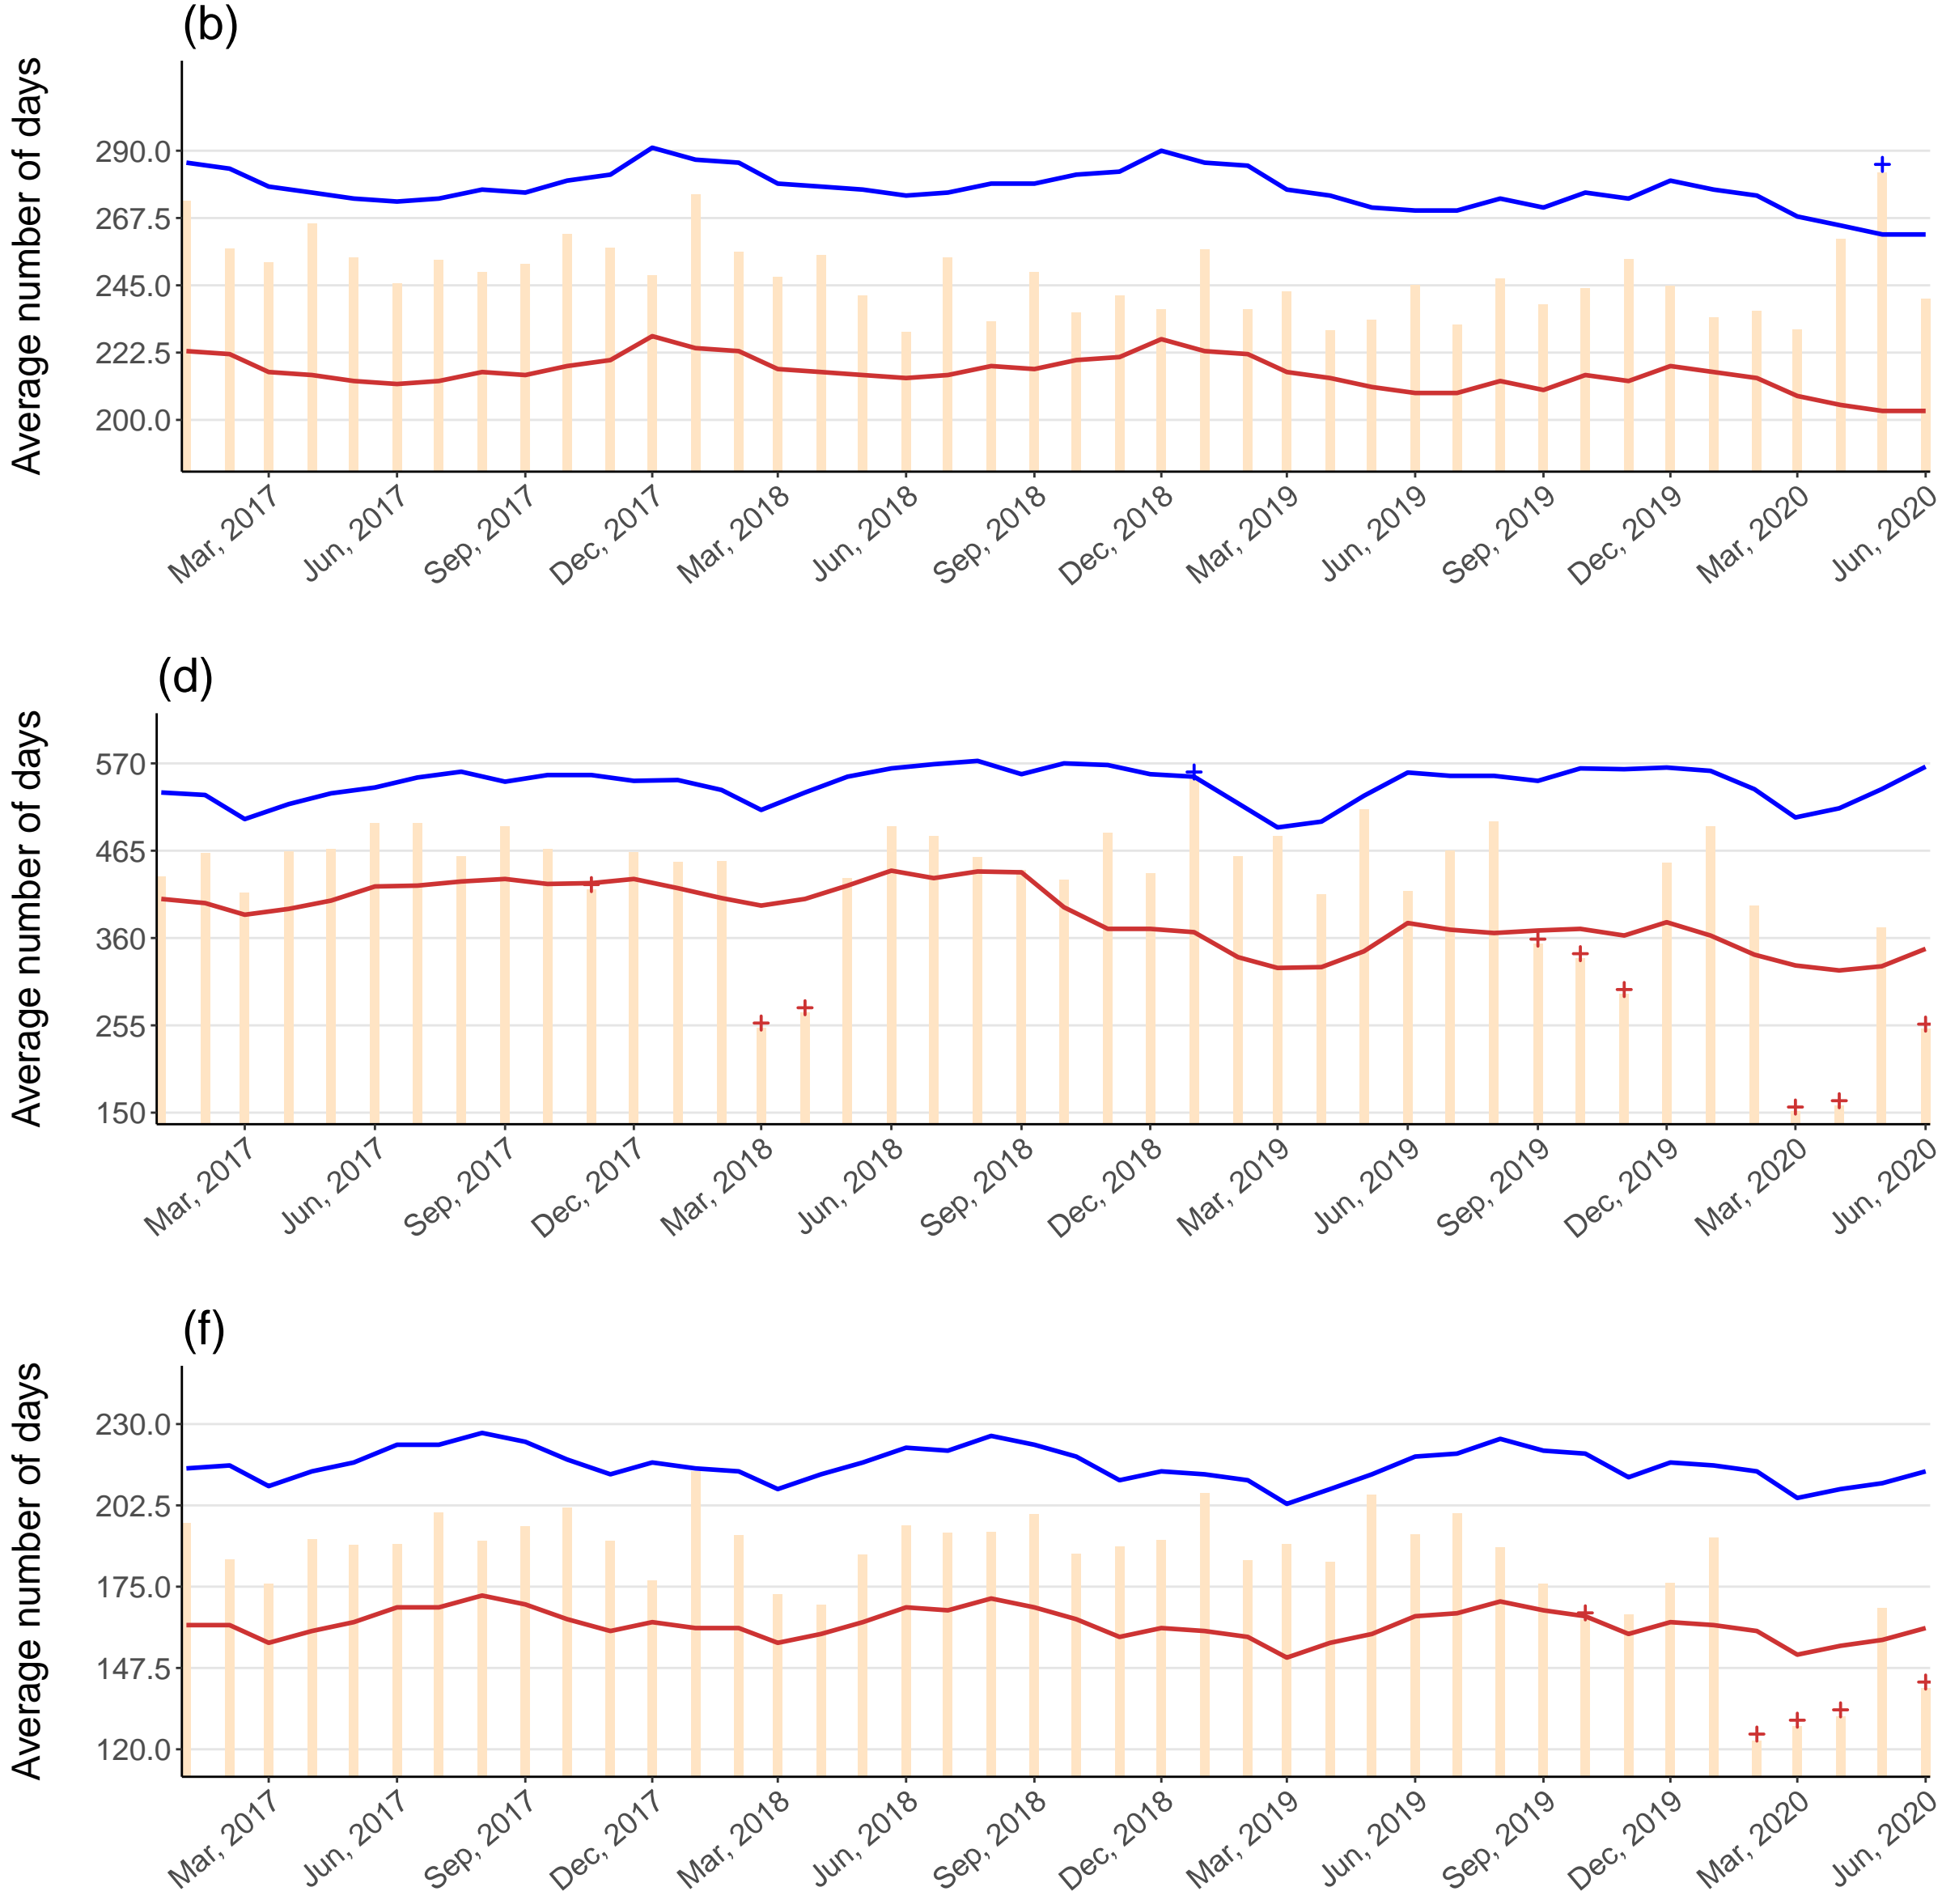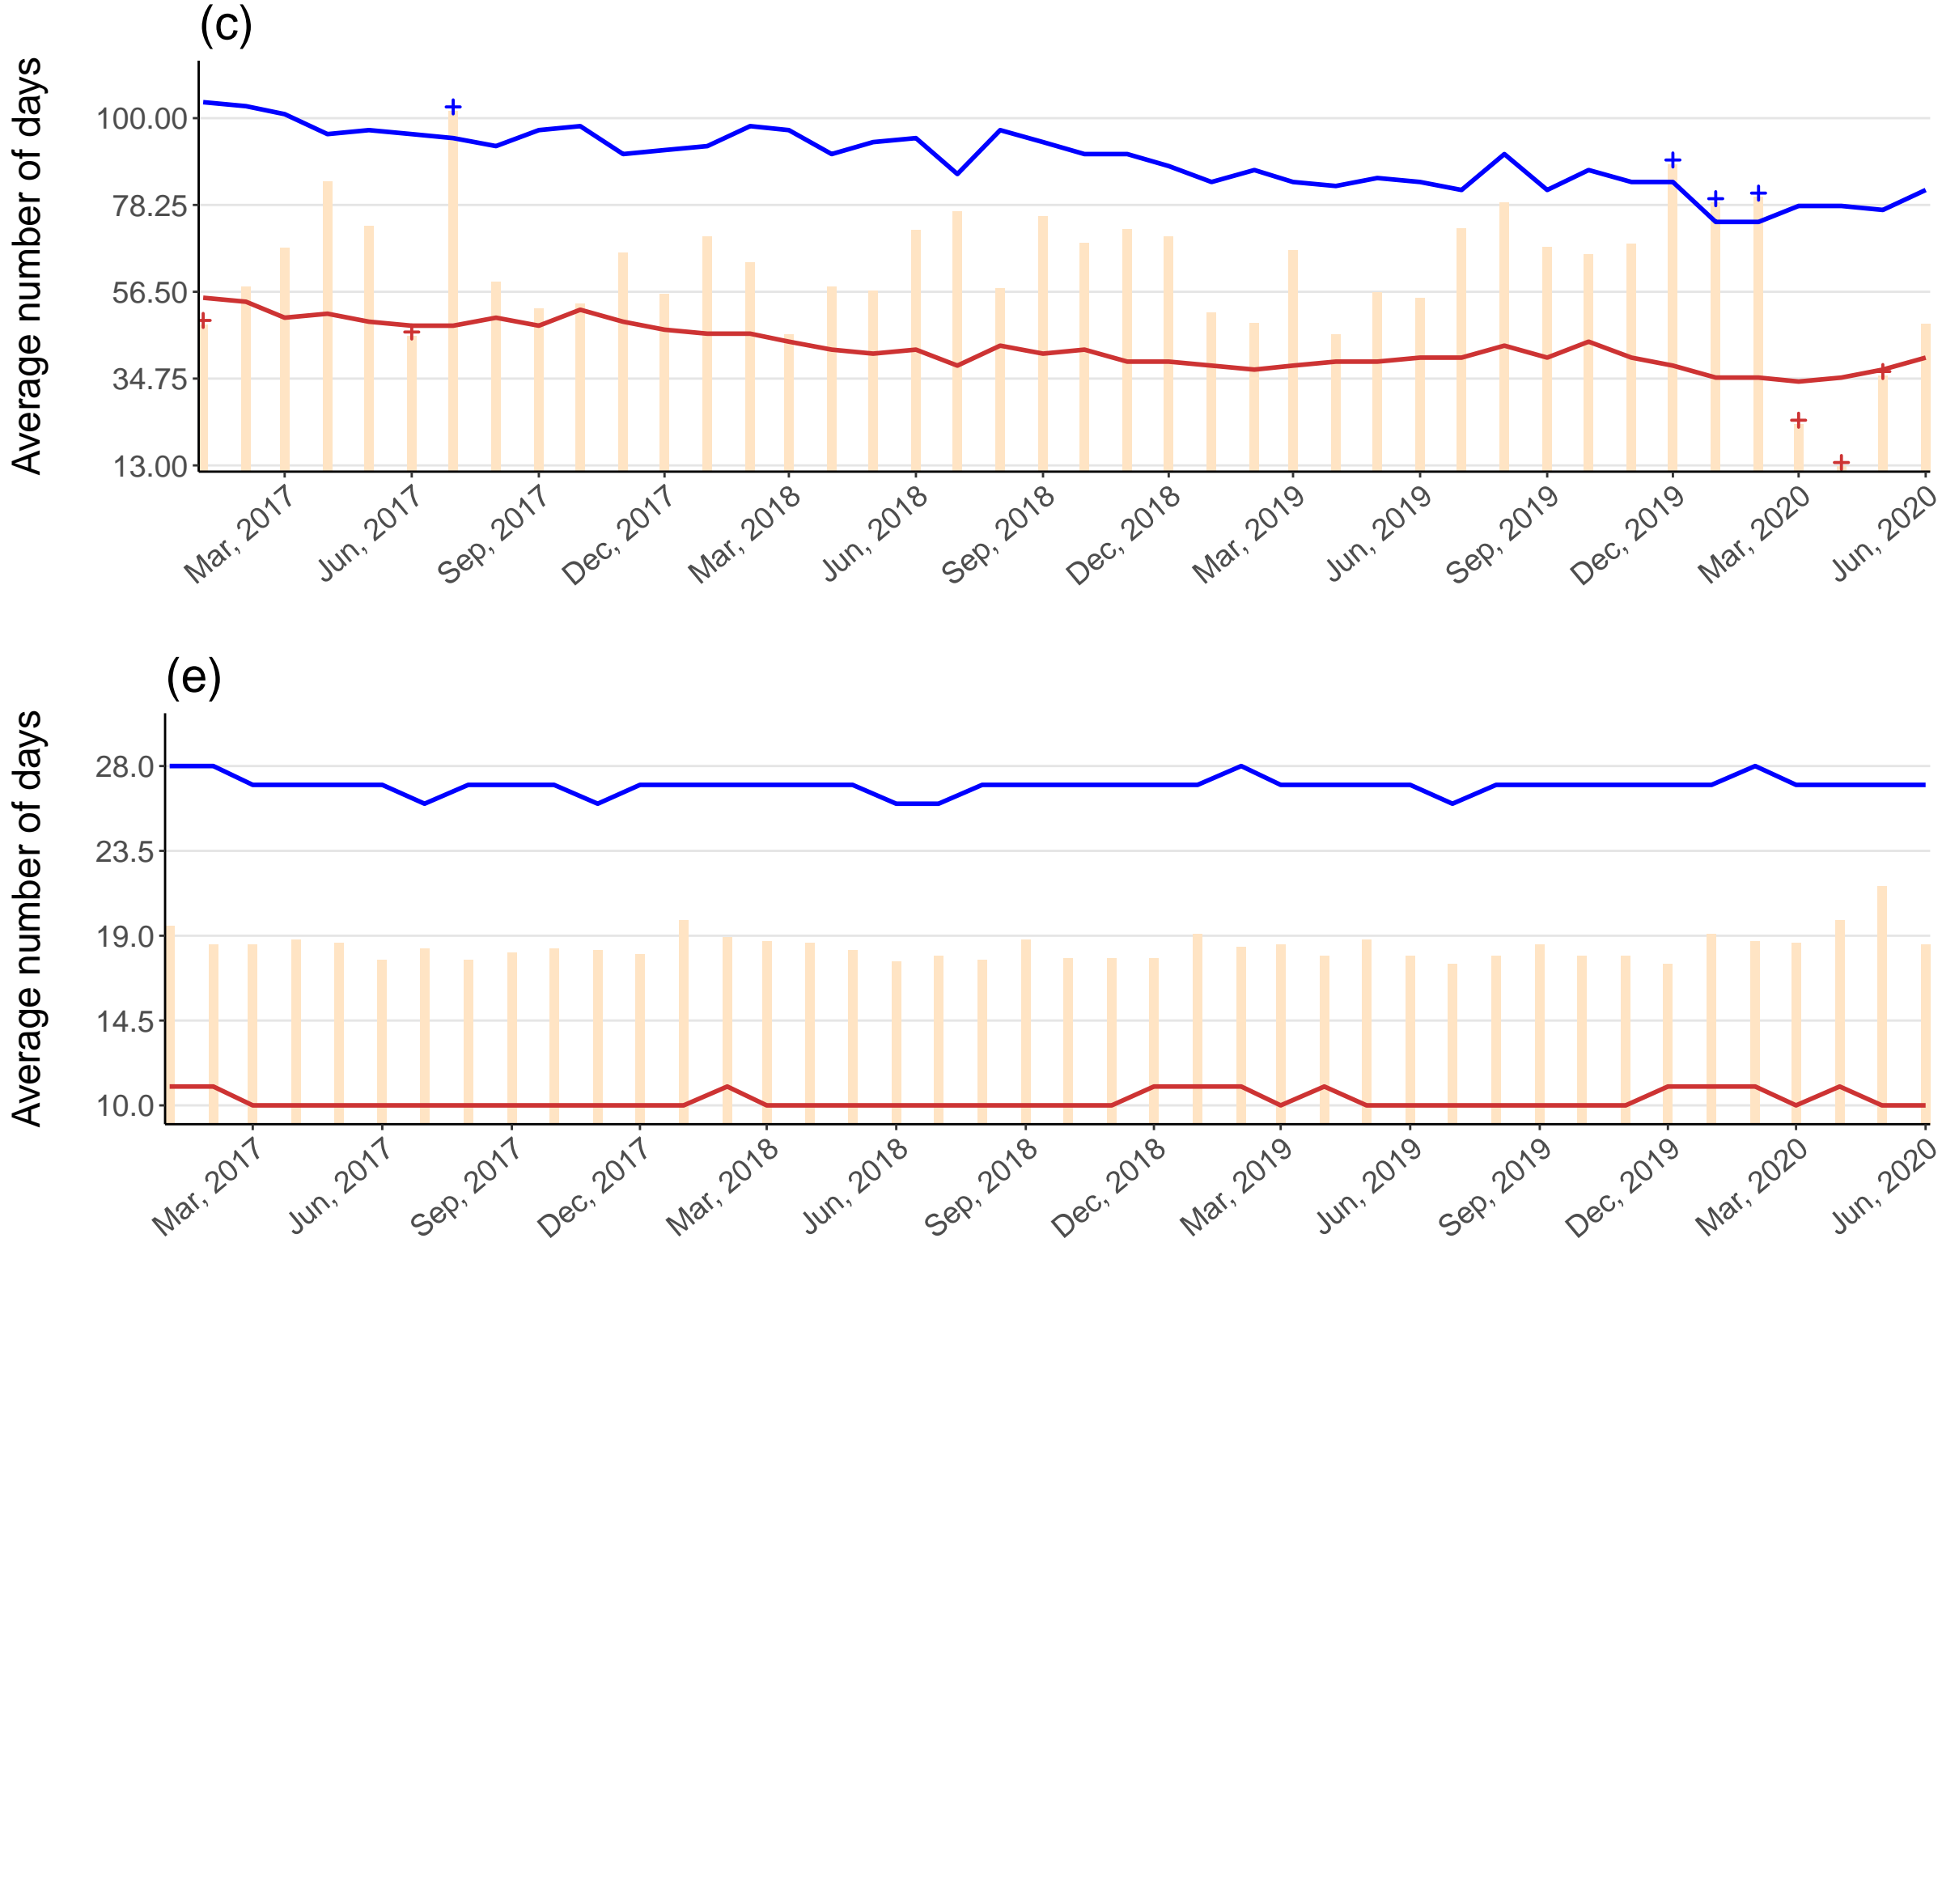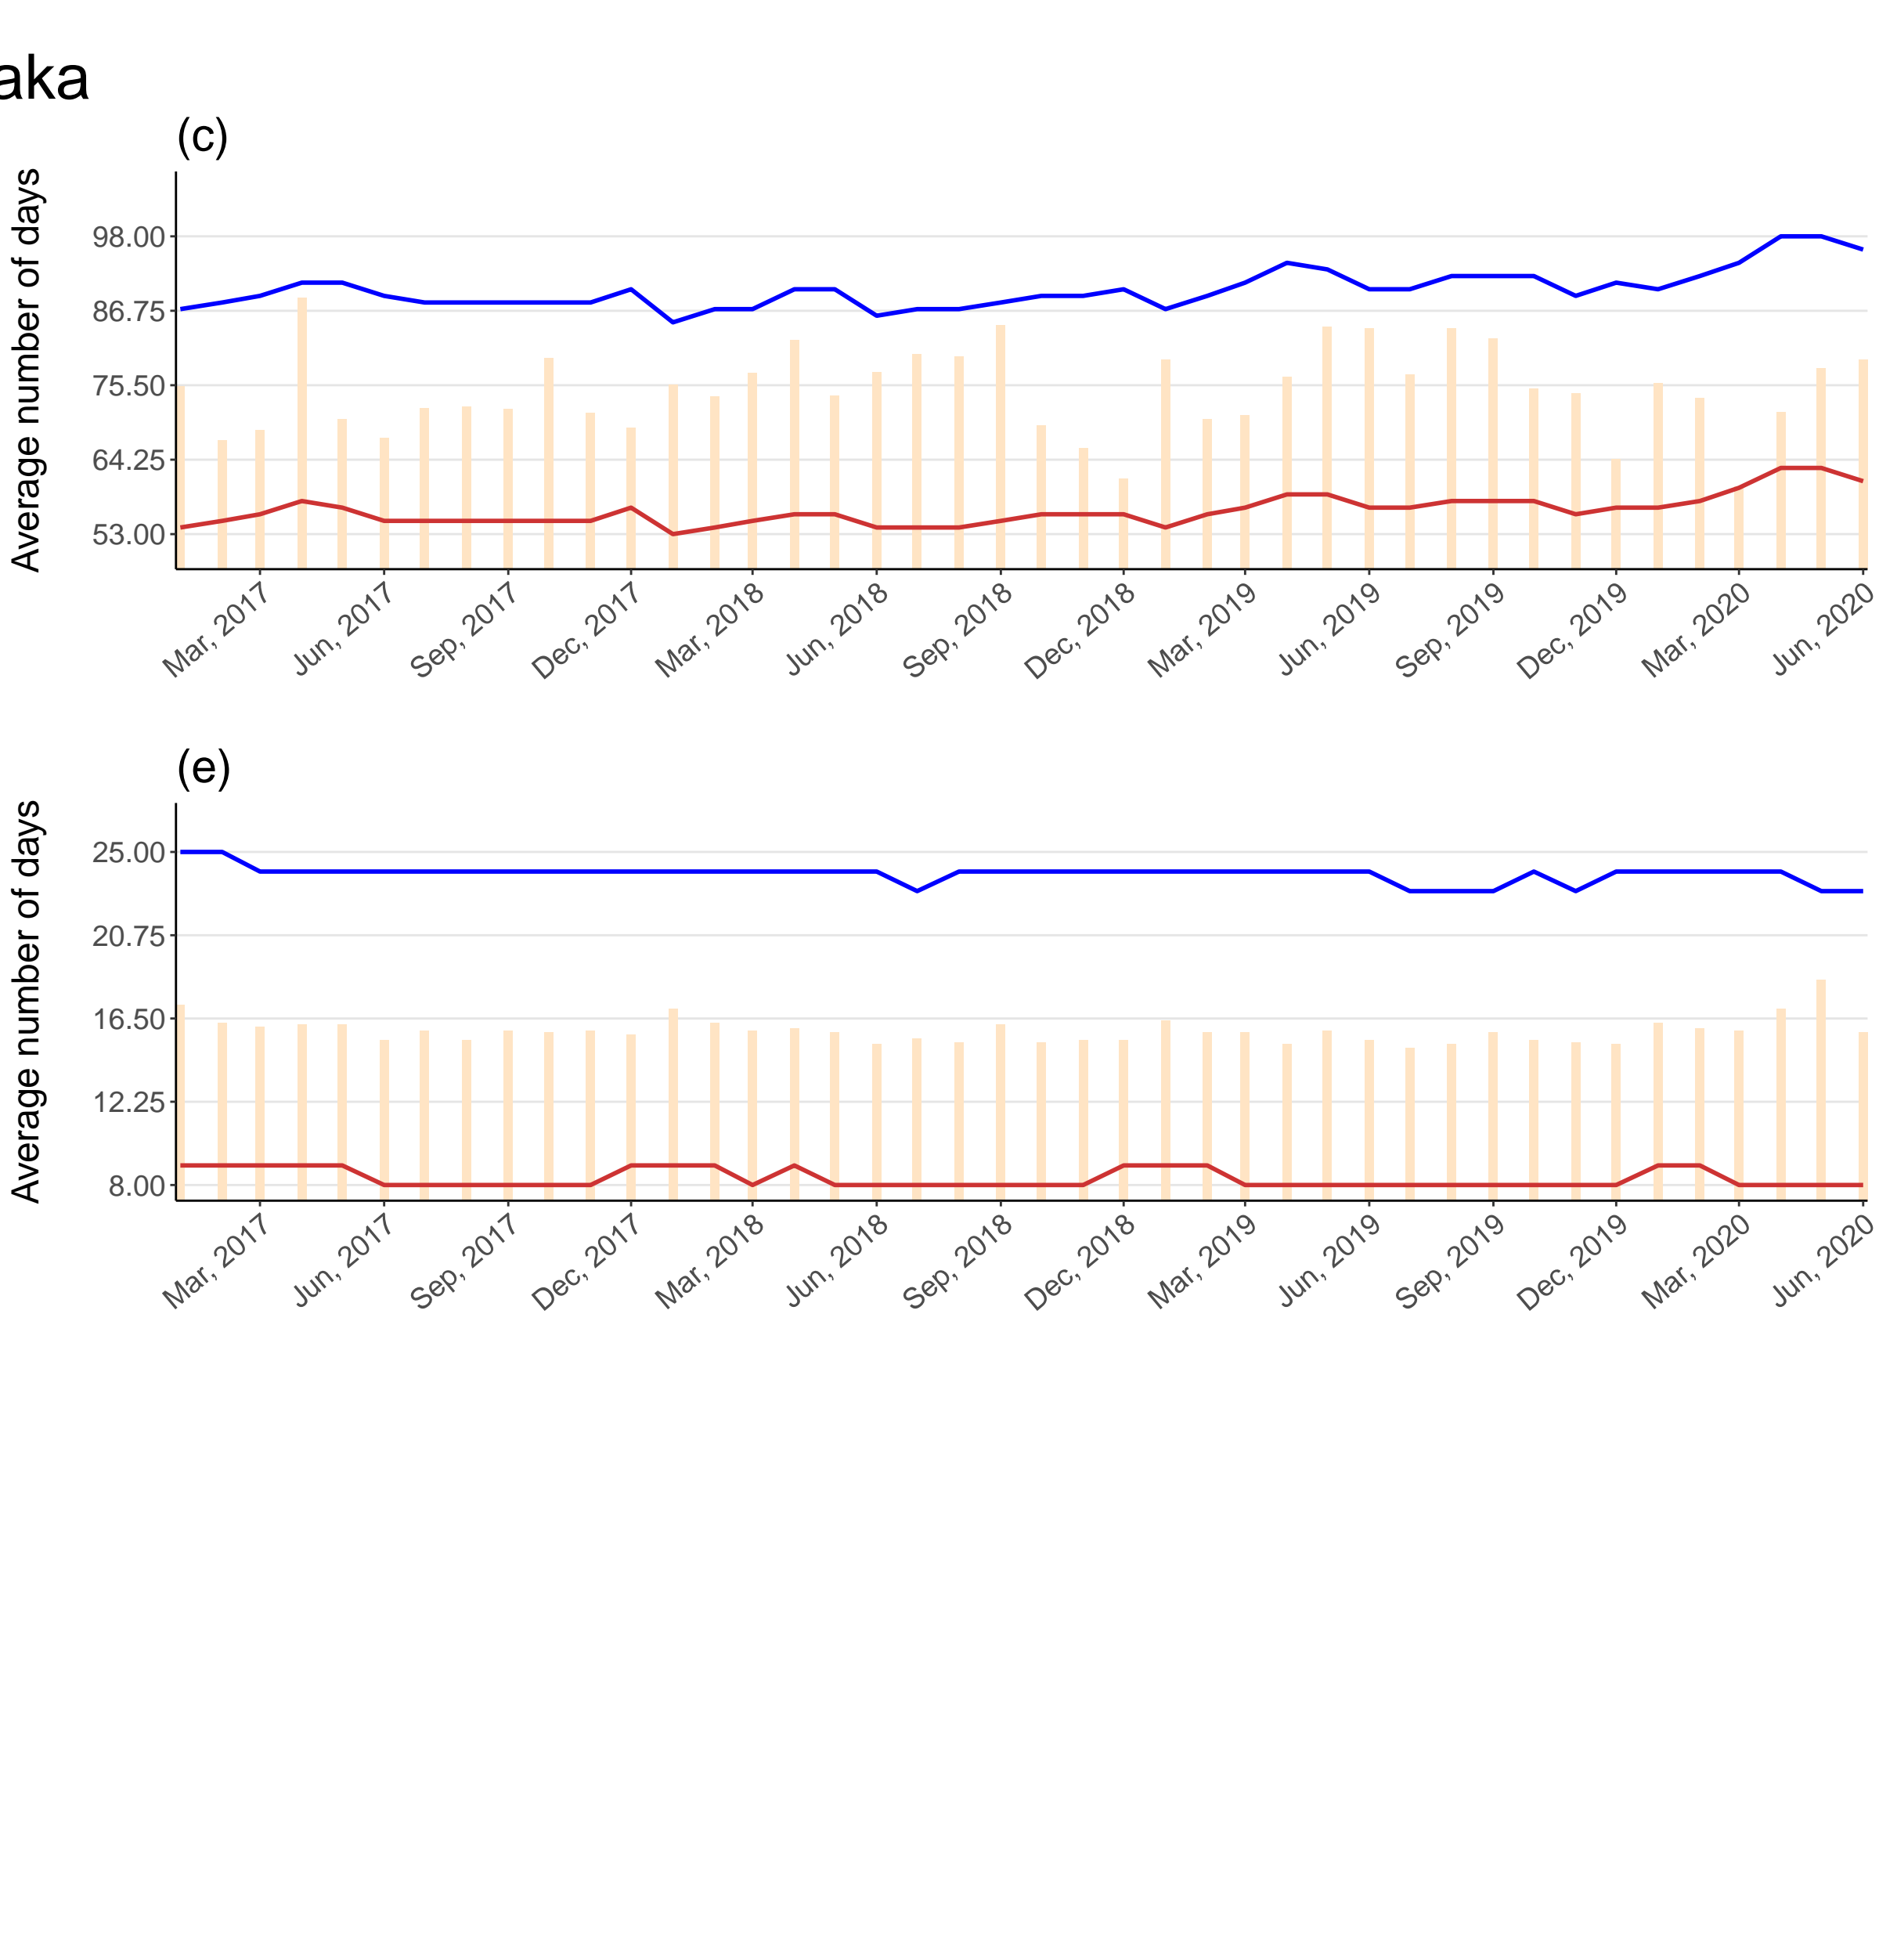

# Osaka

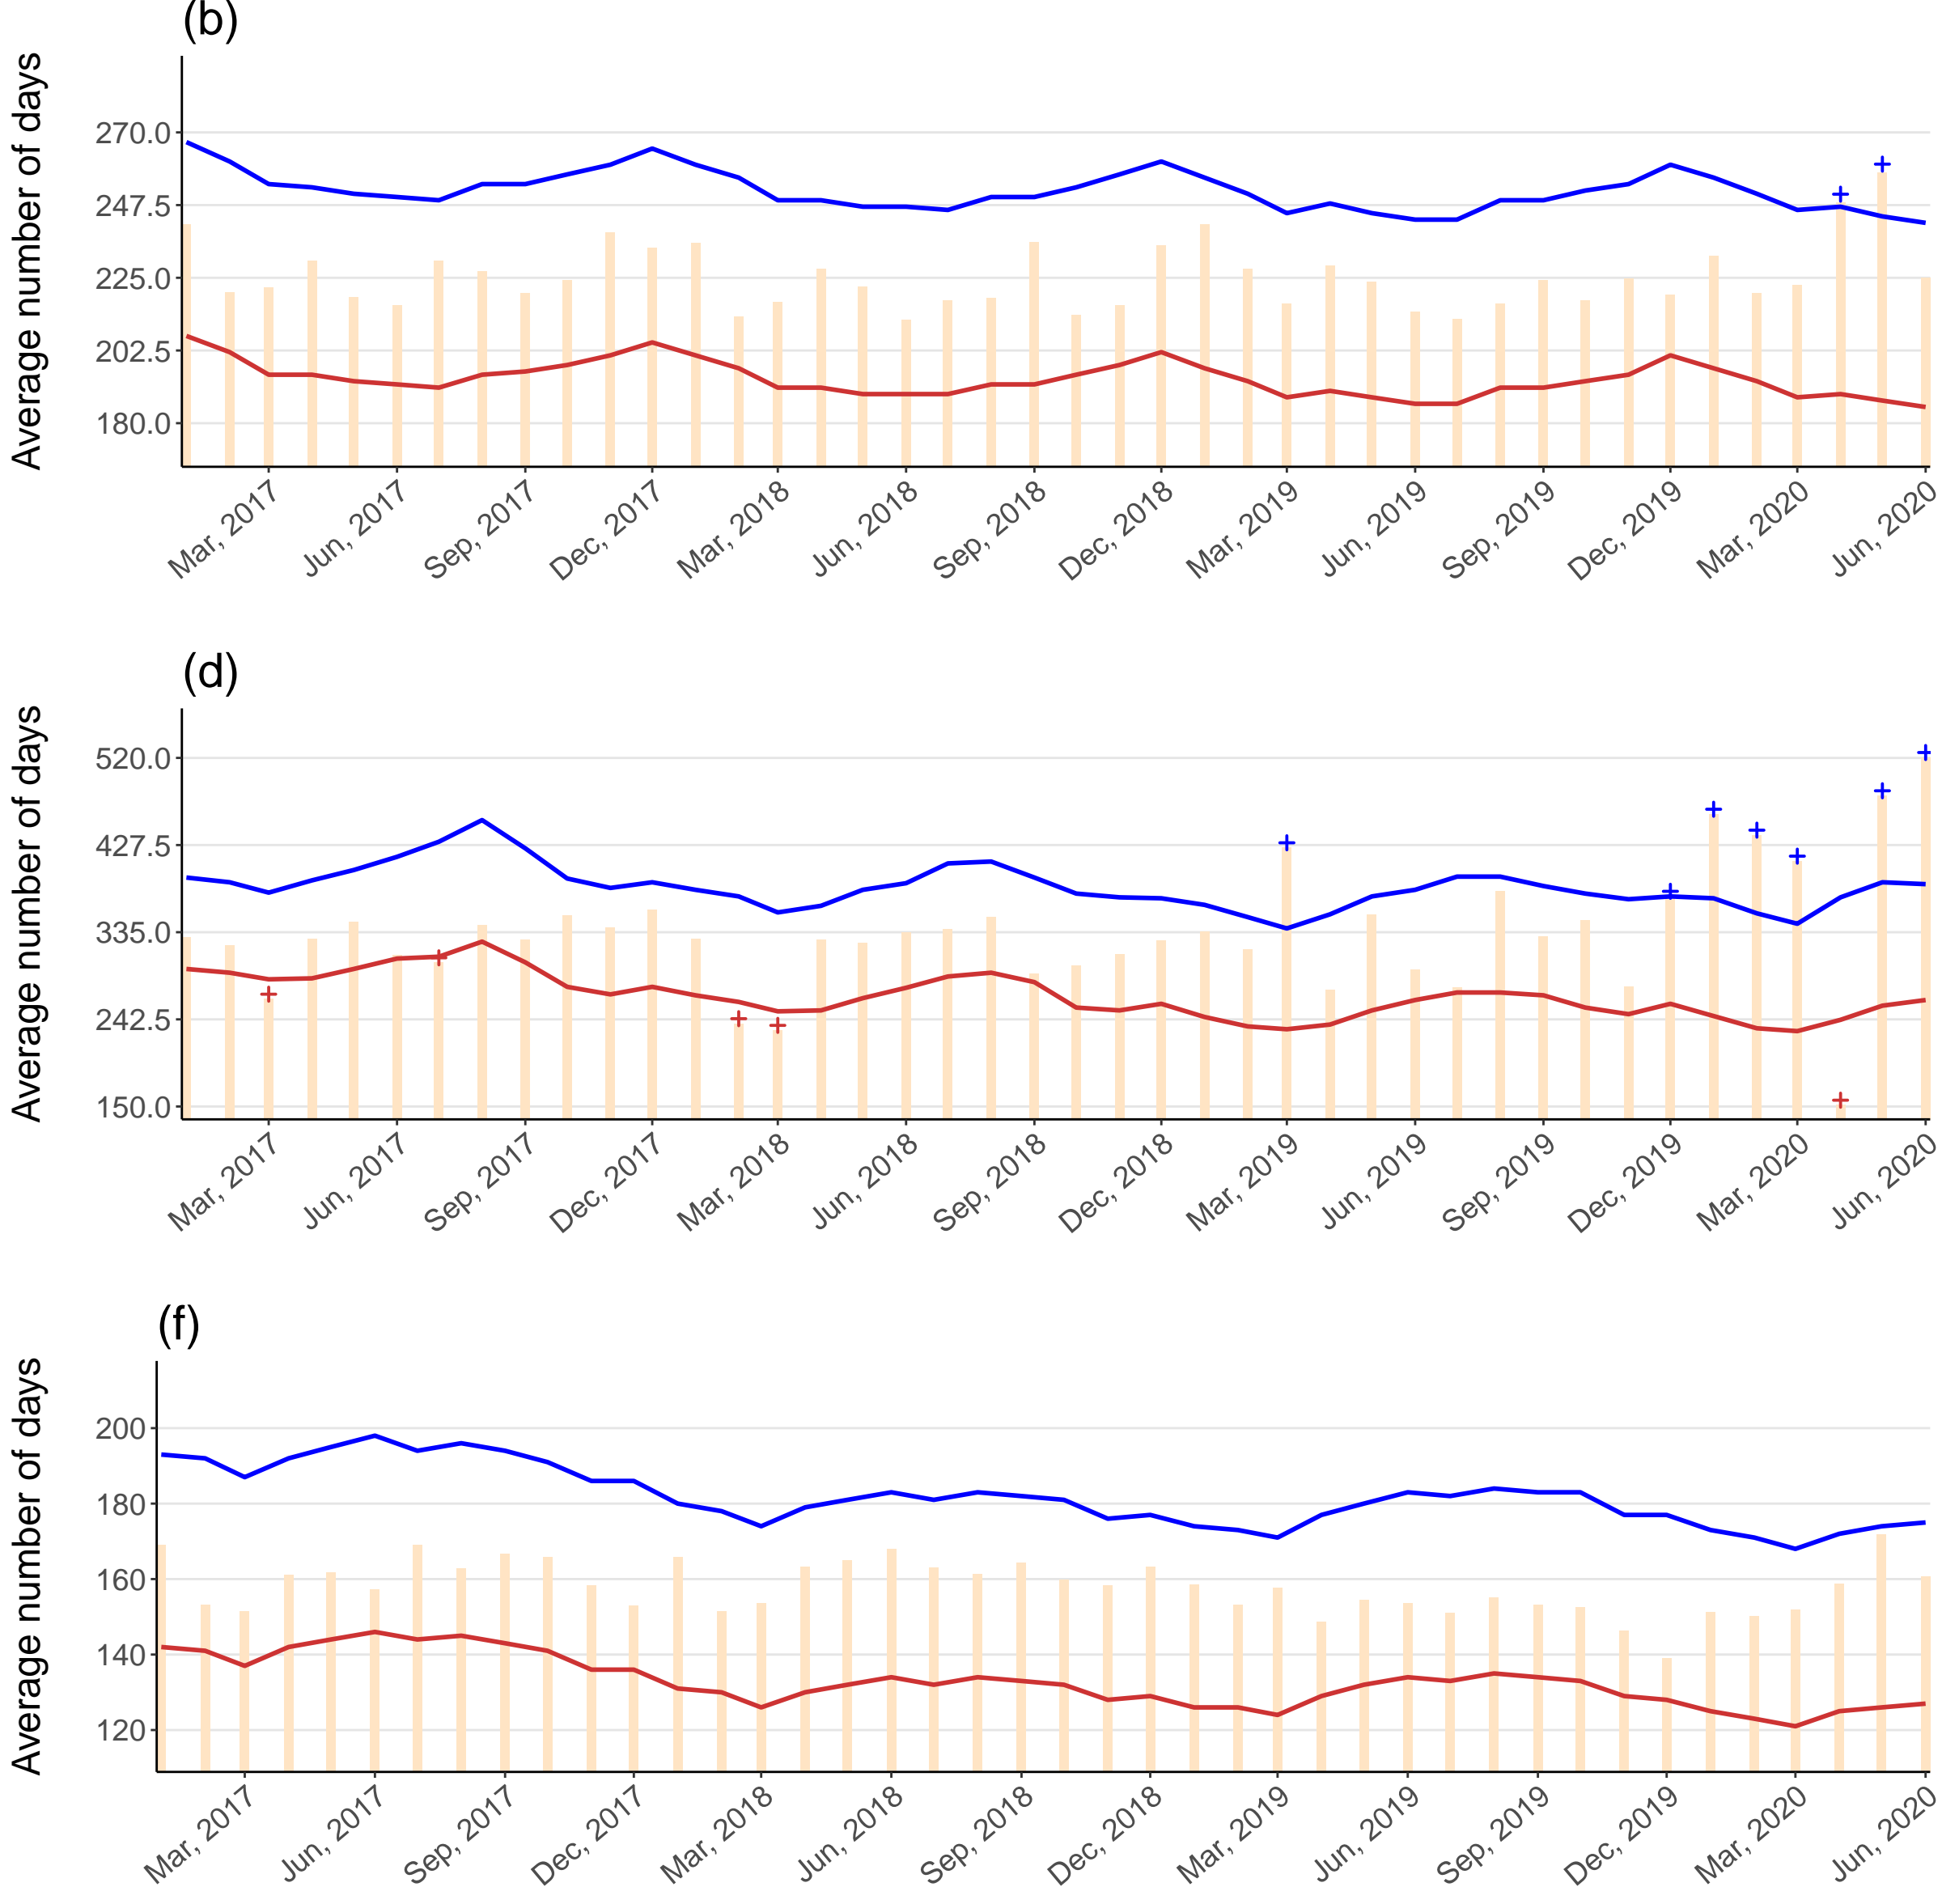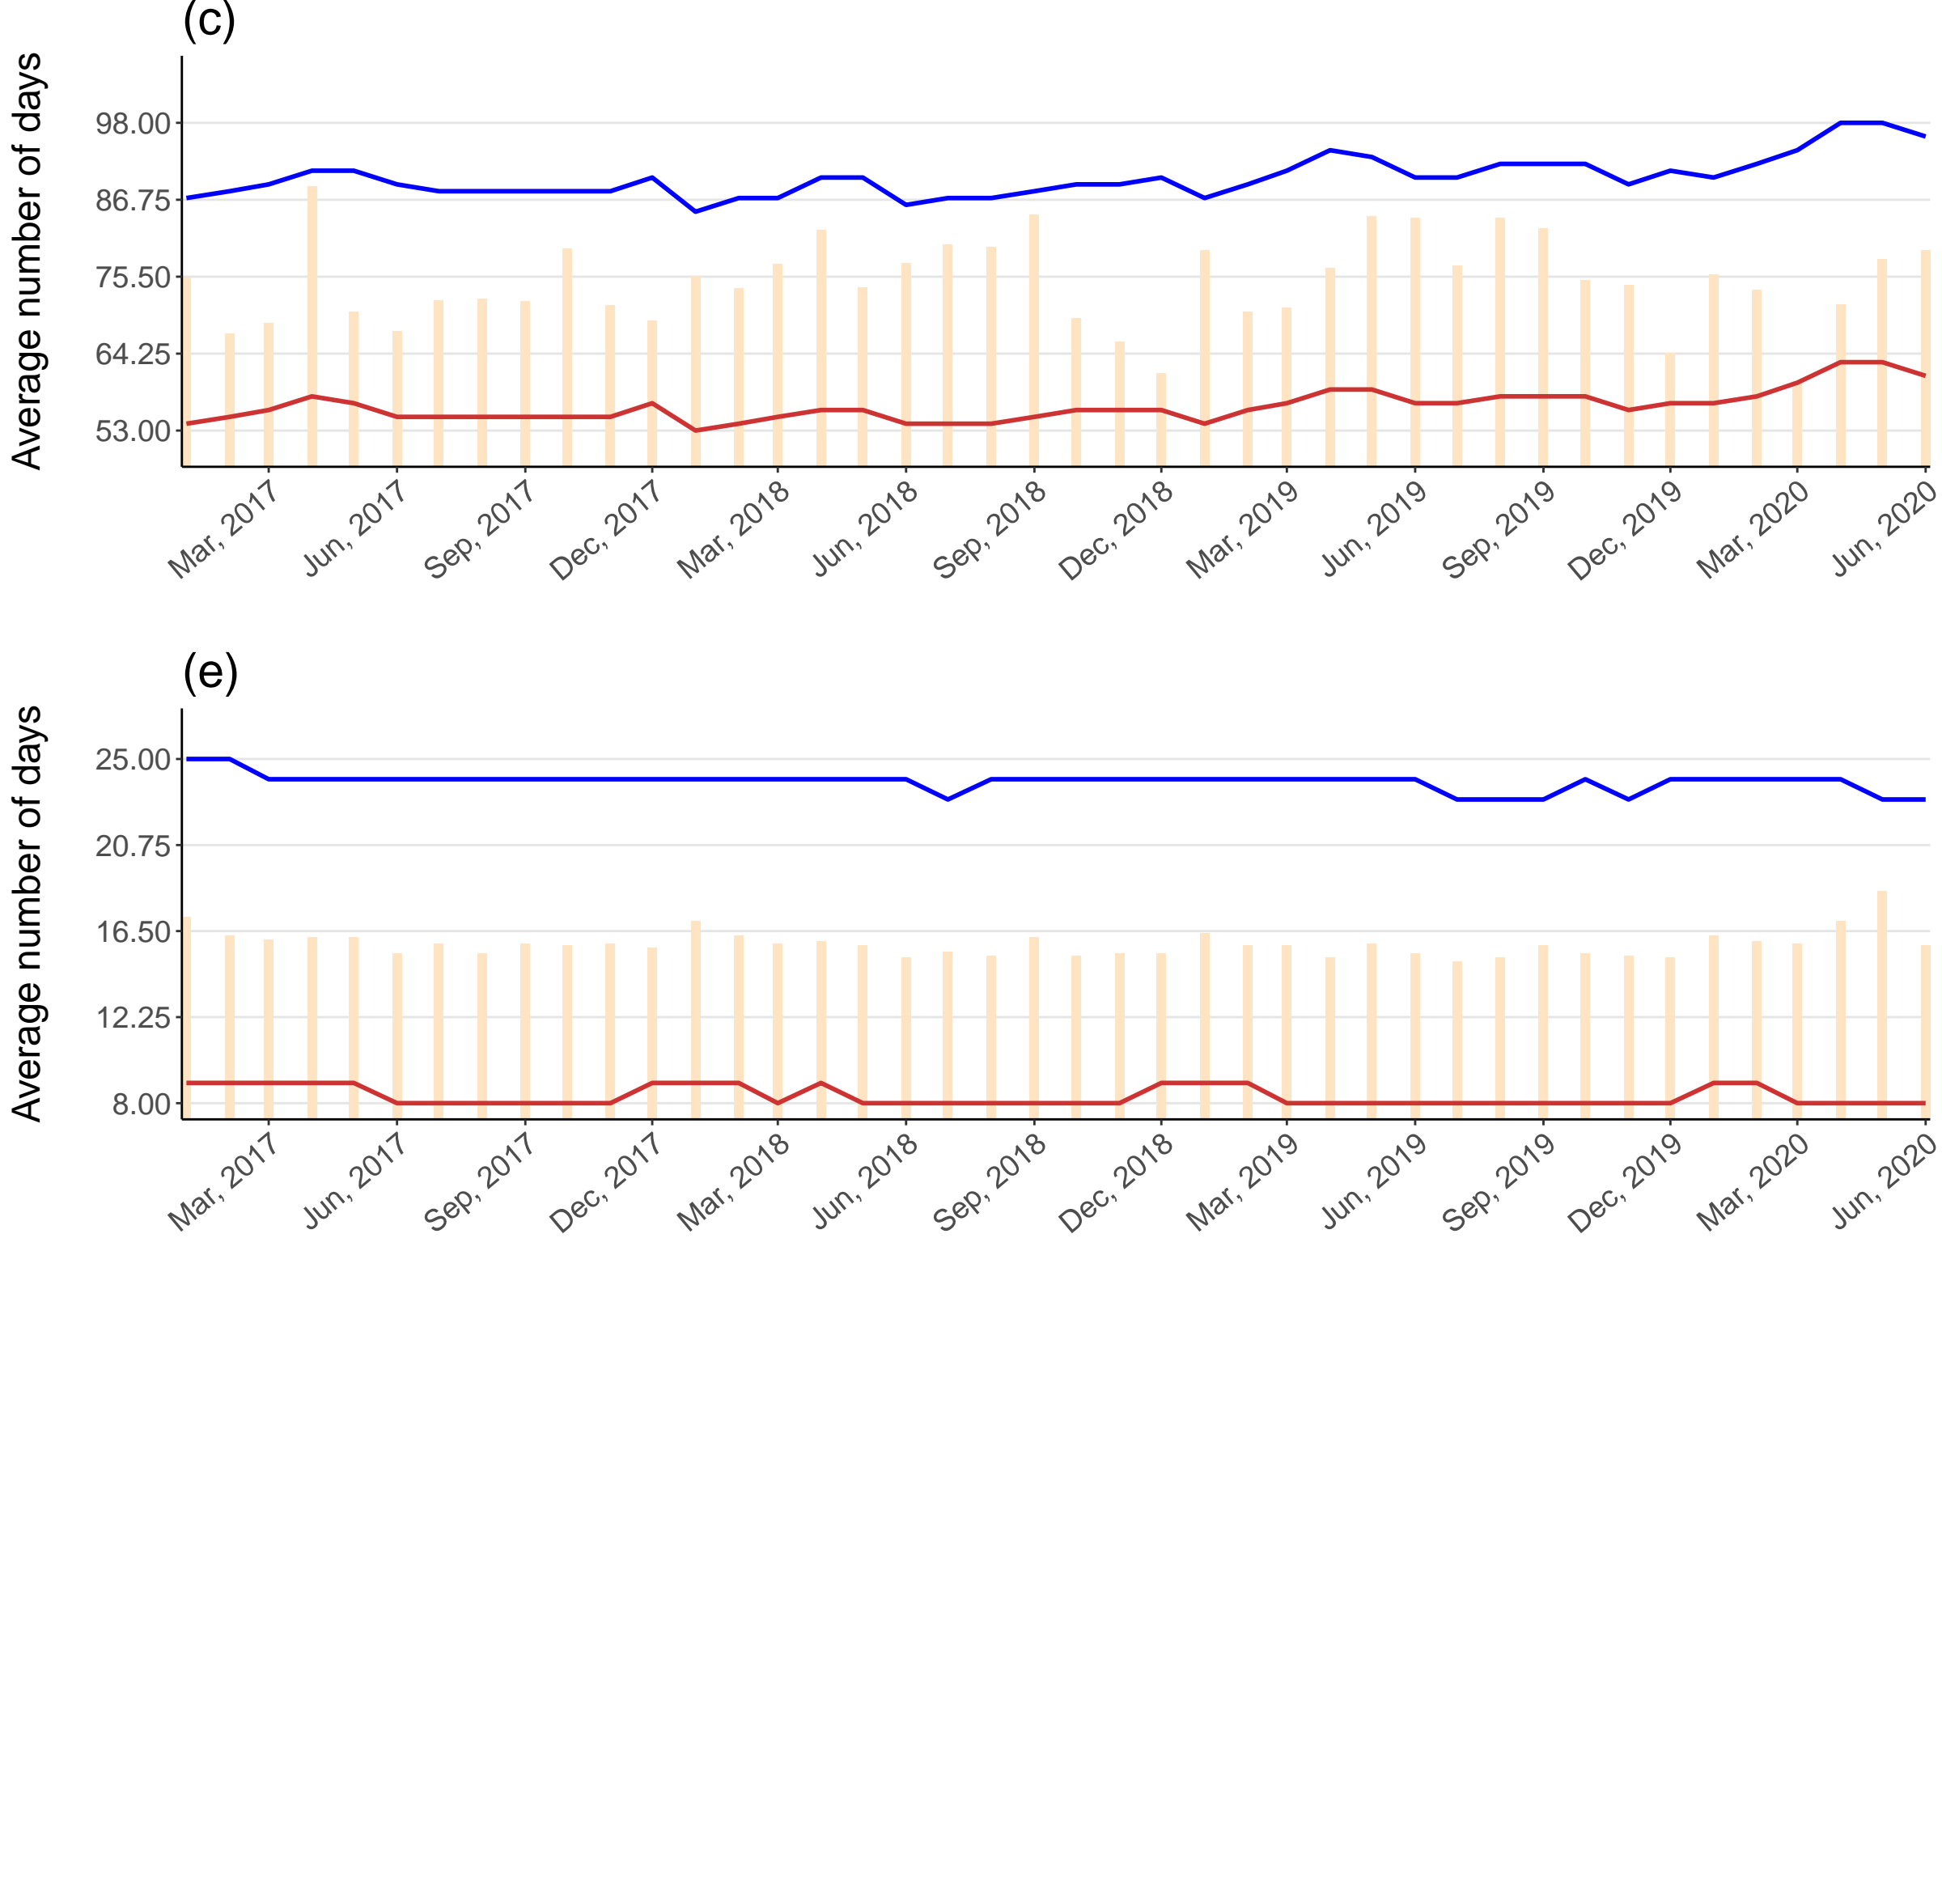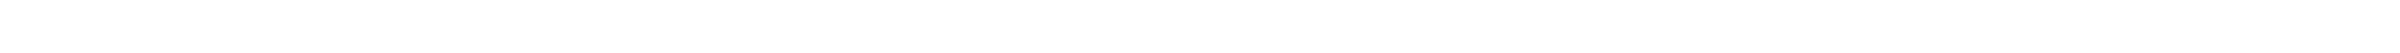

Hyogo

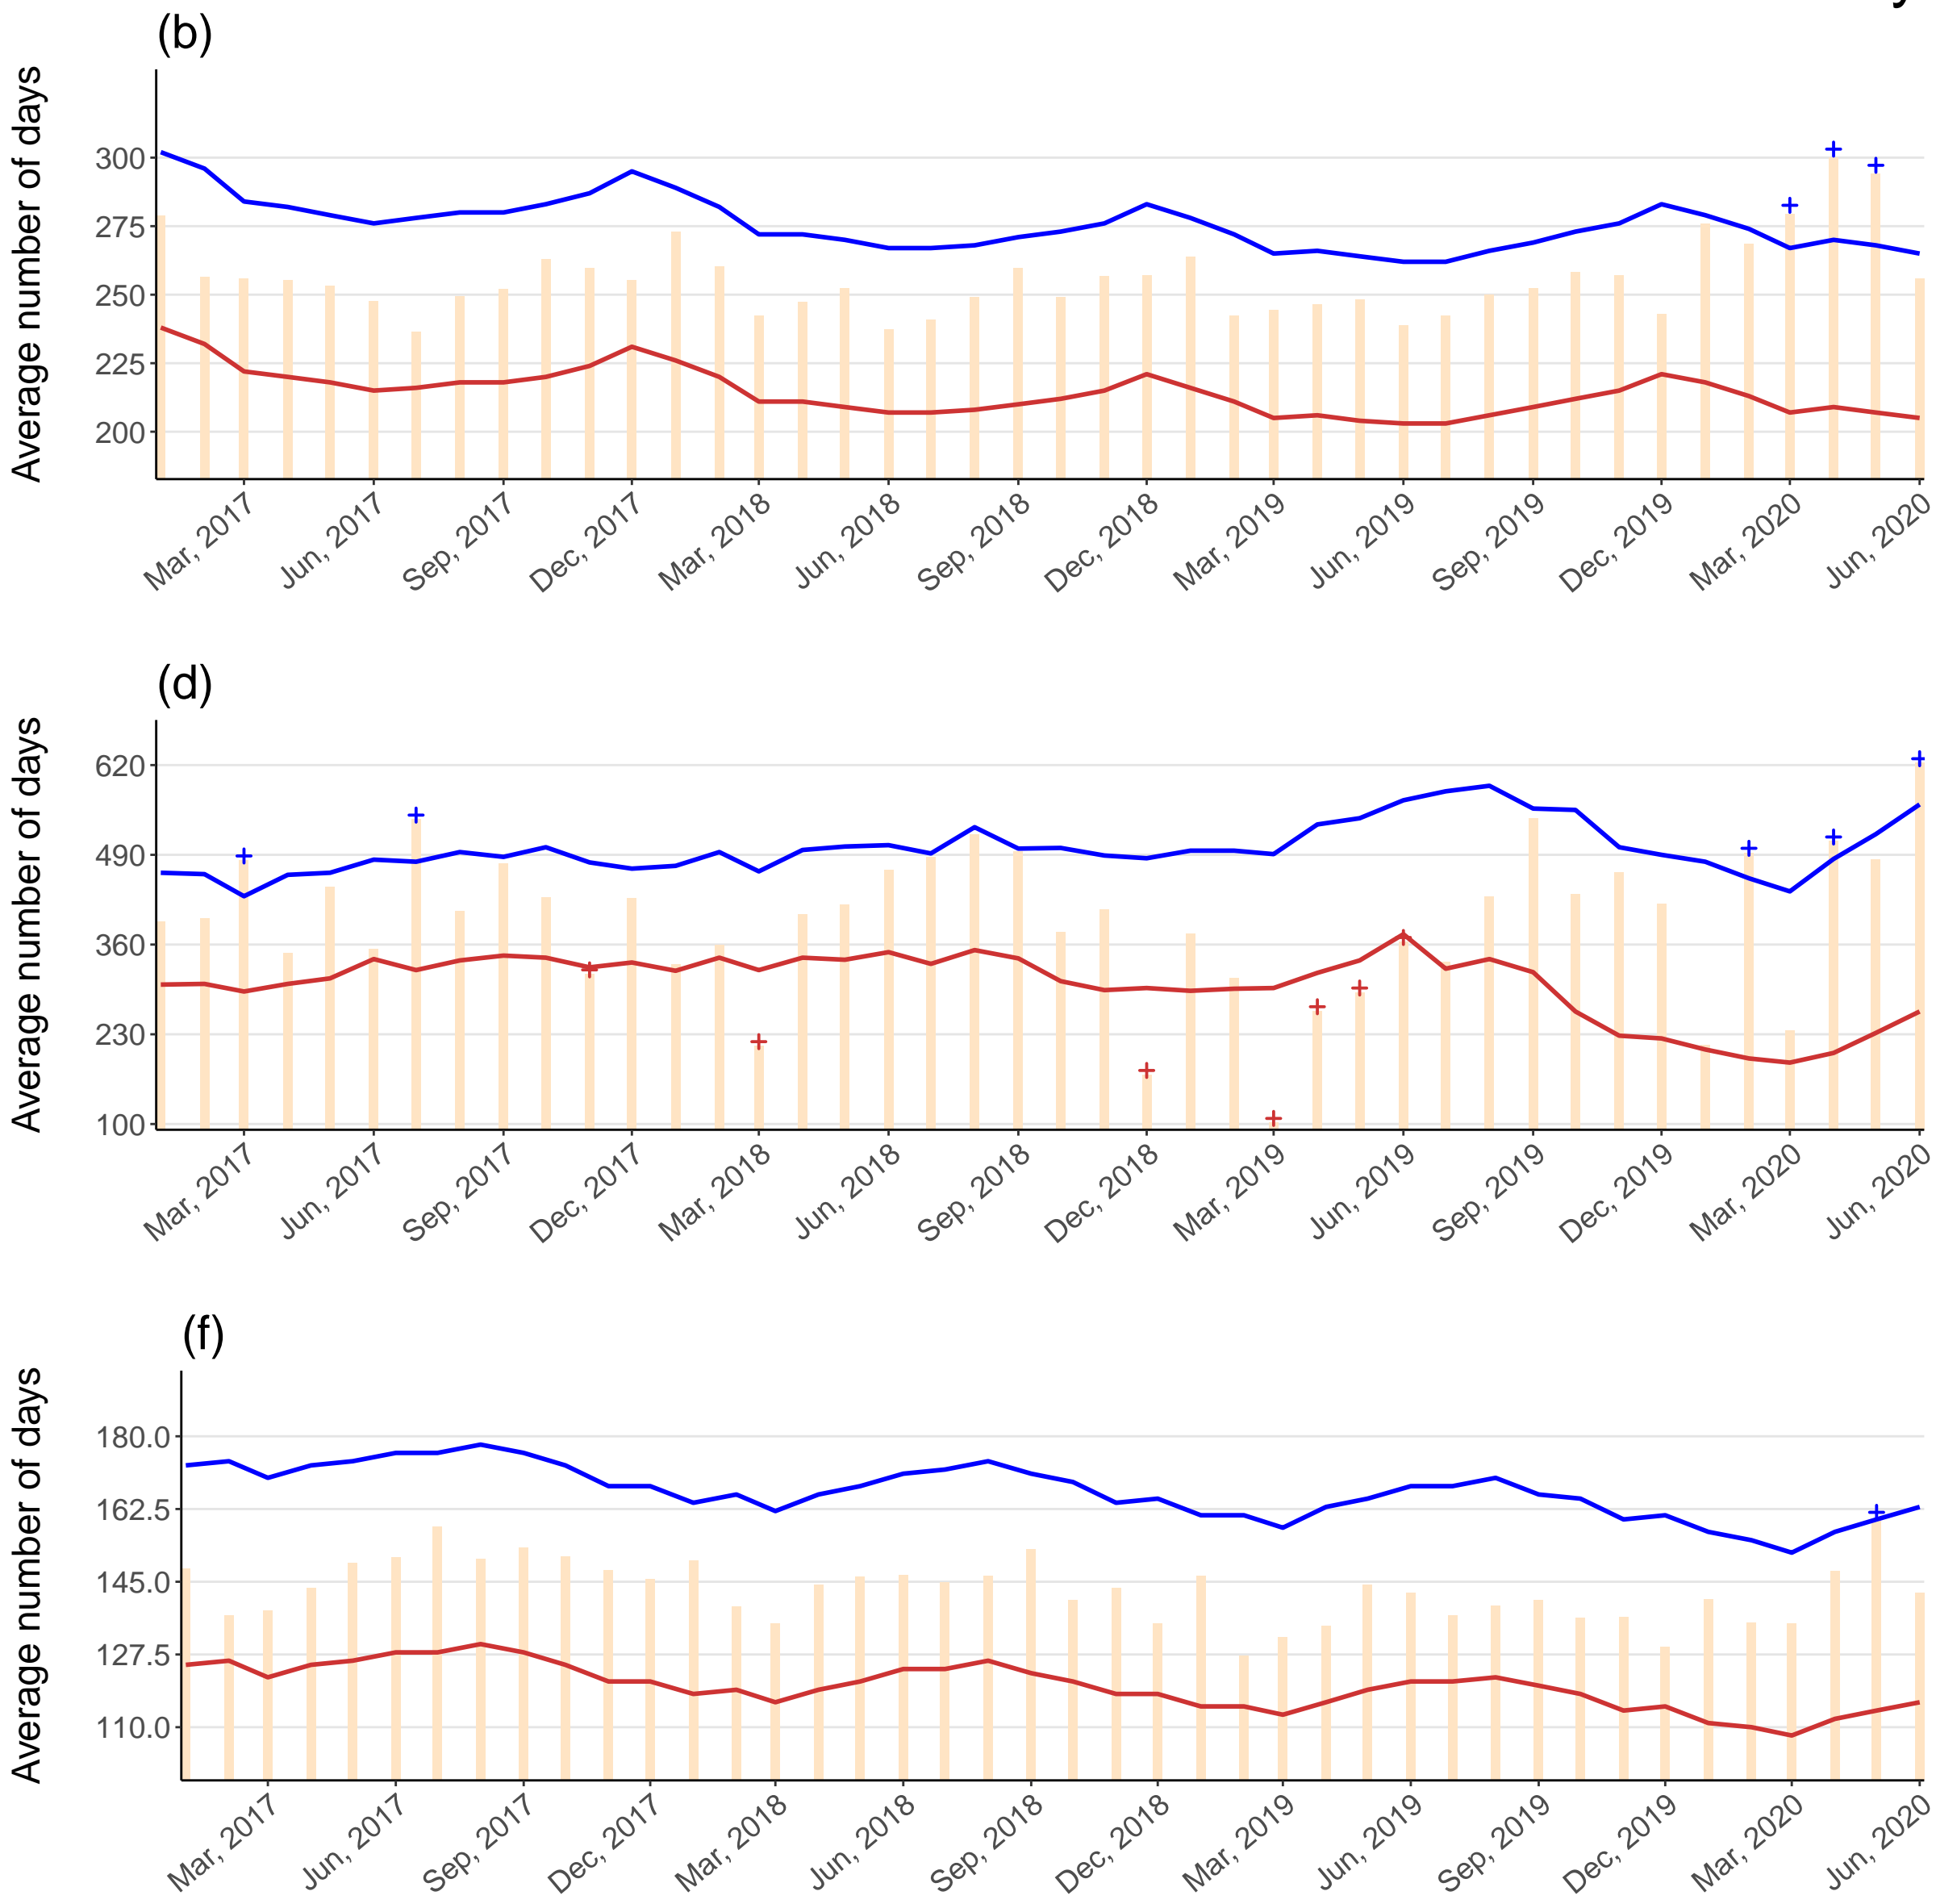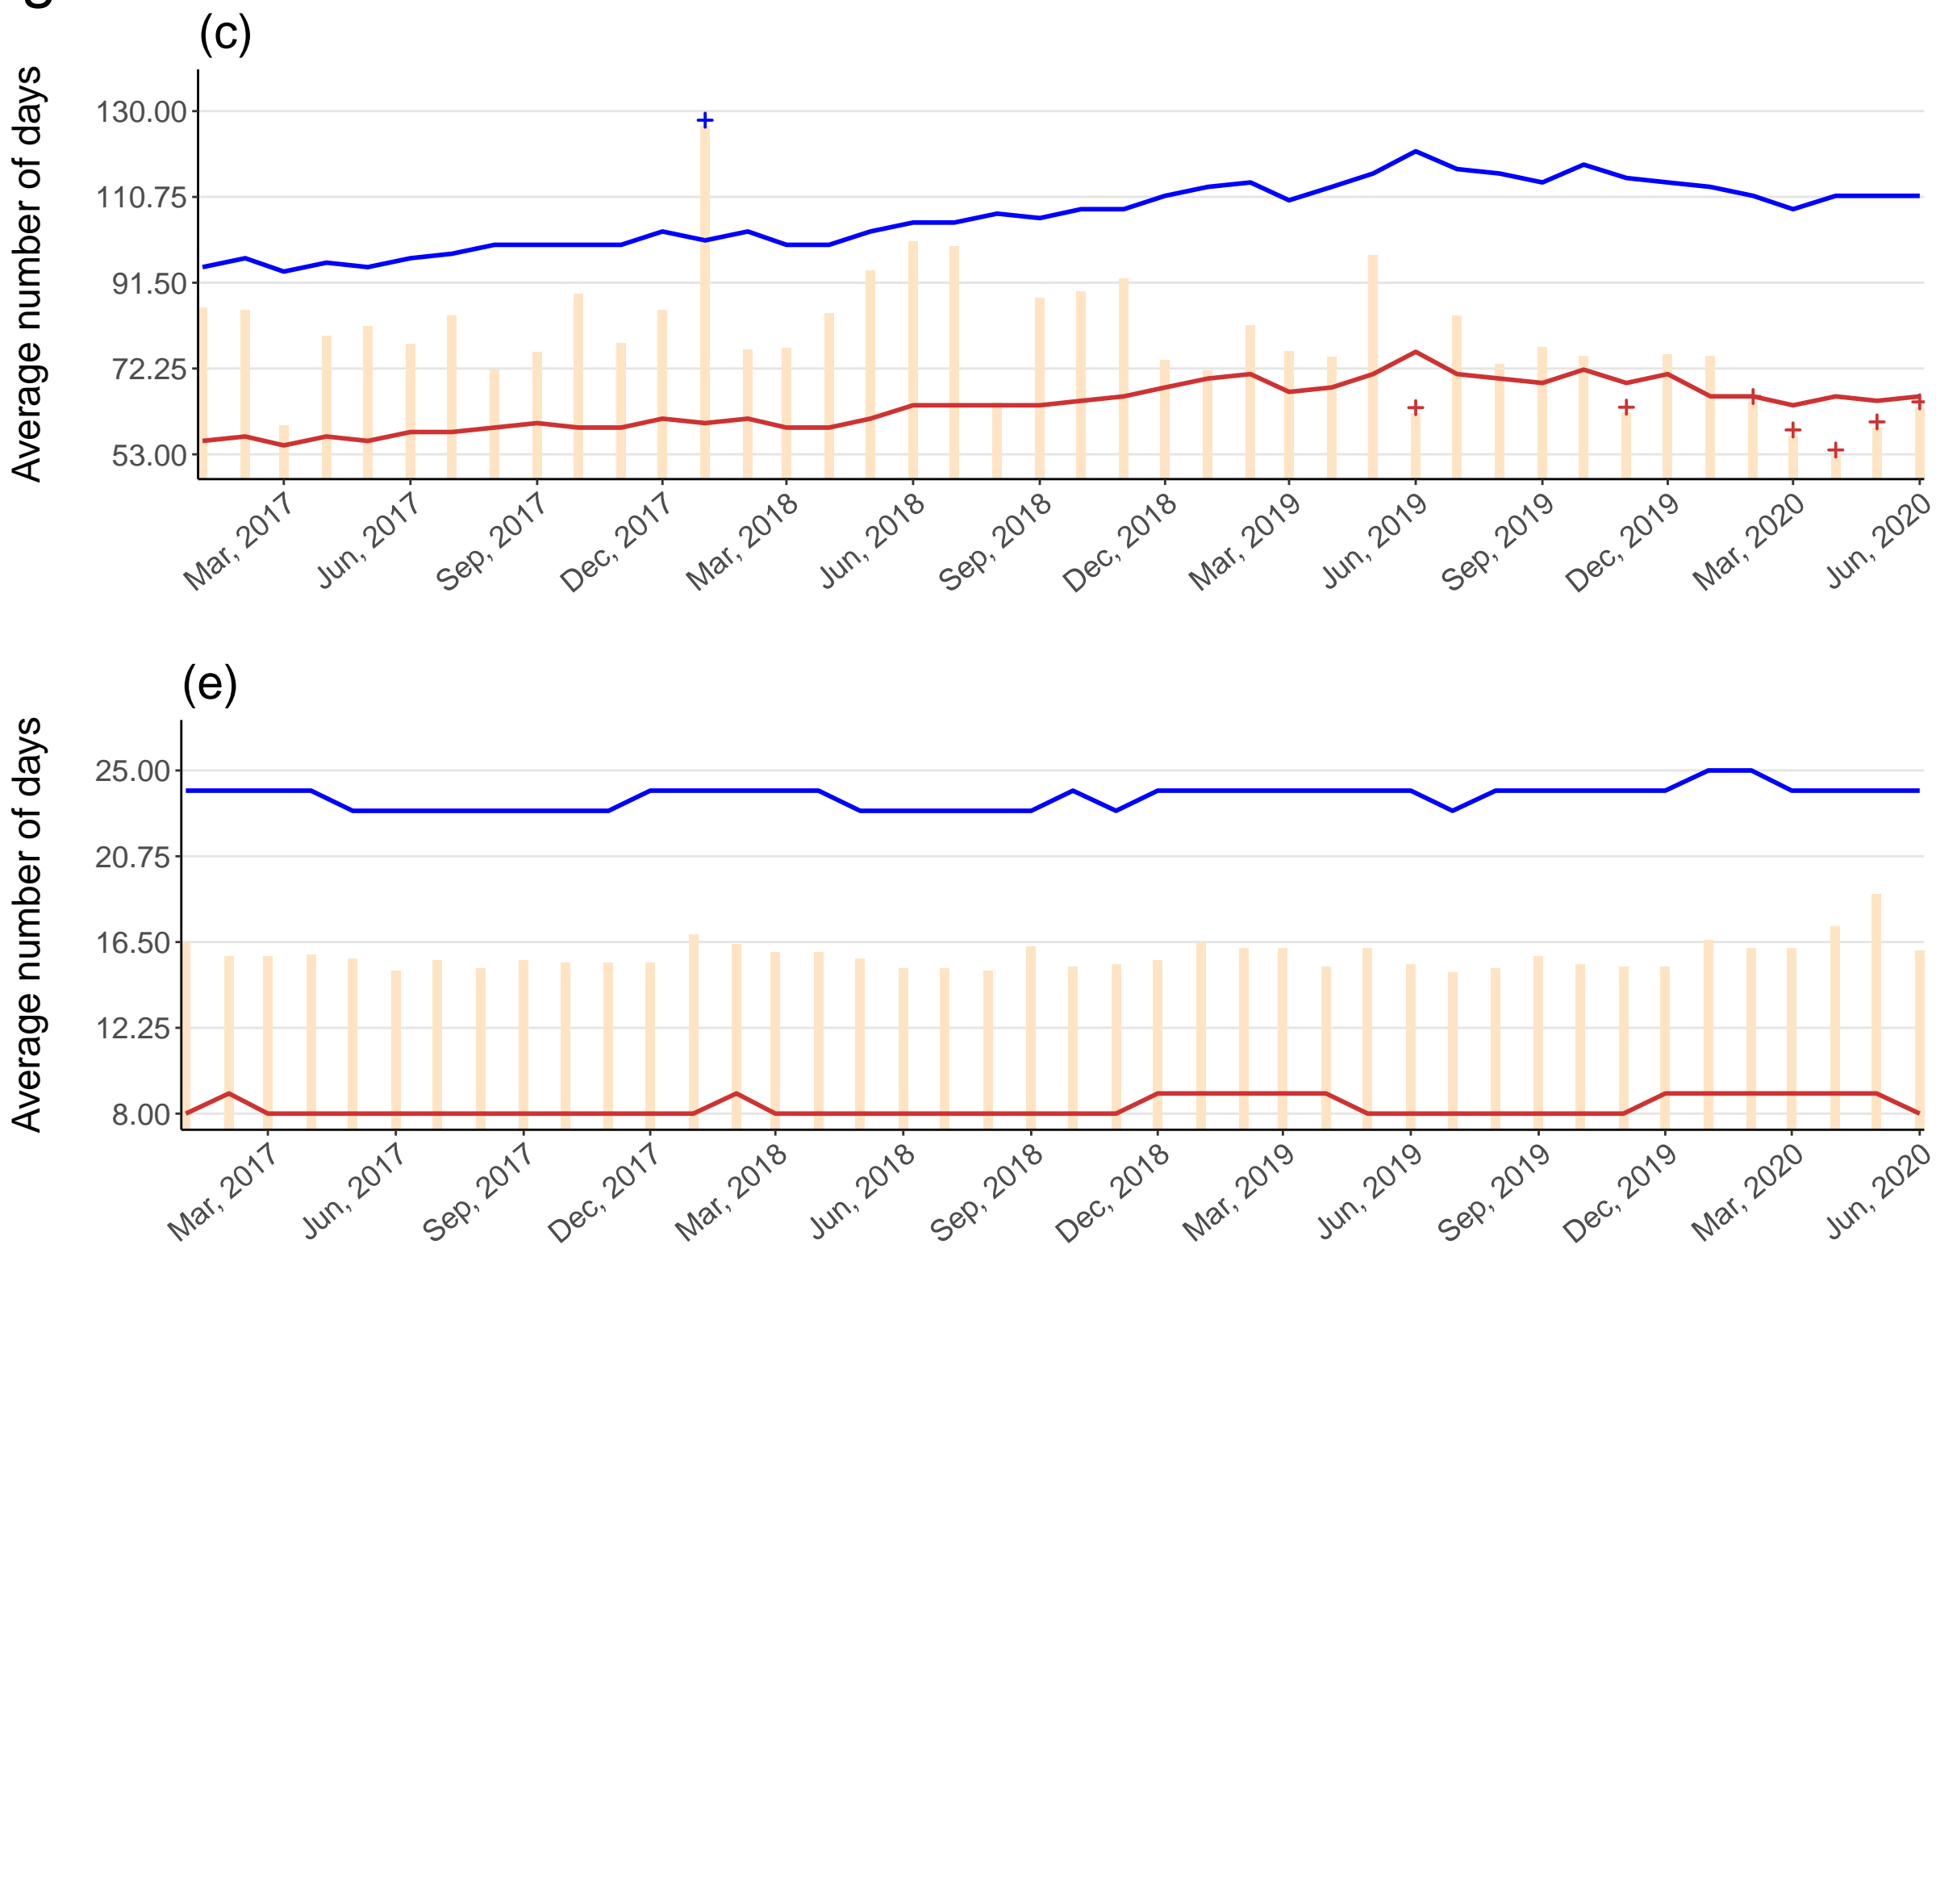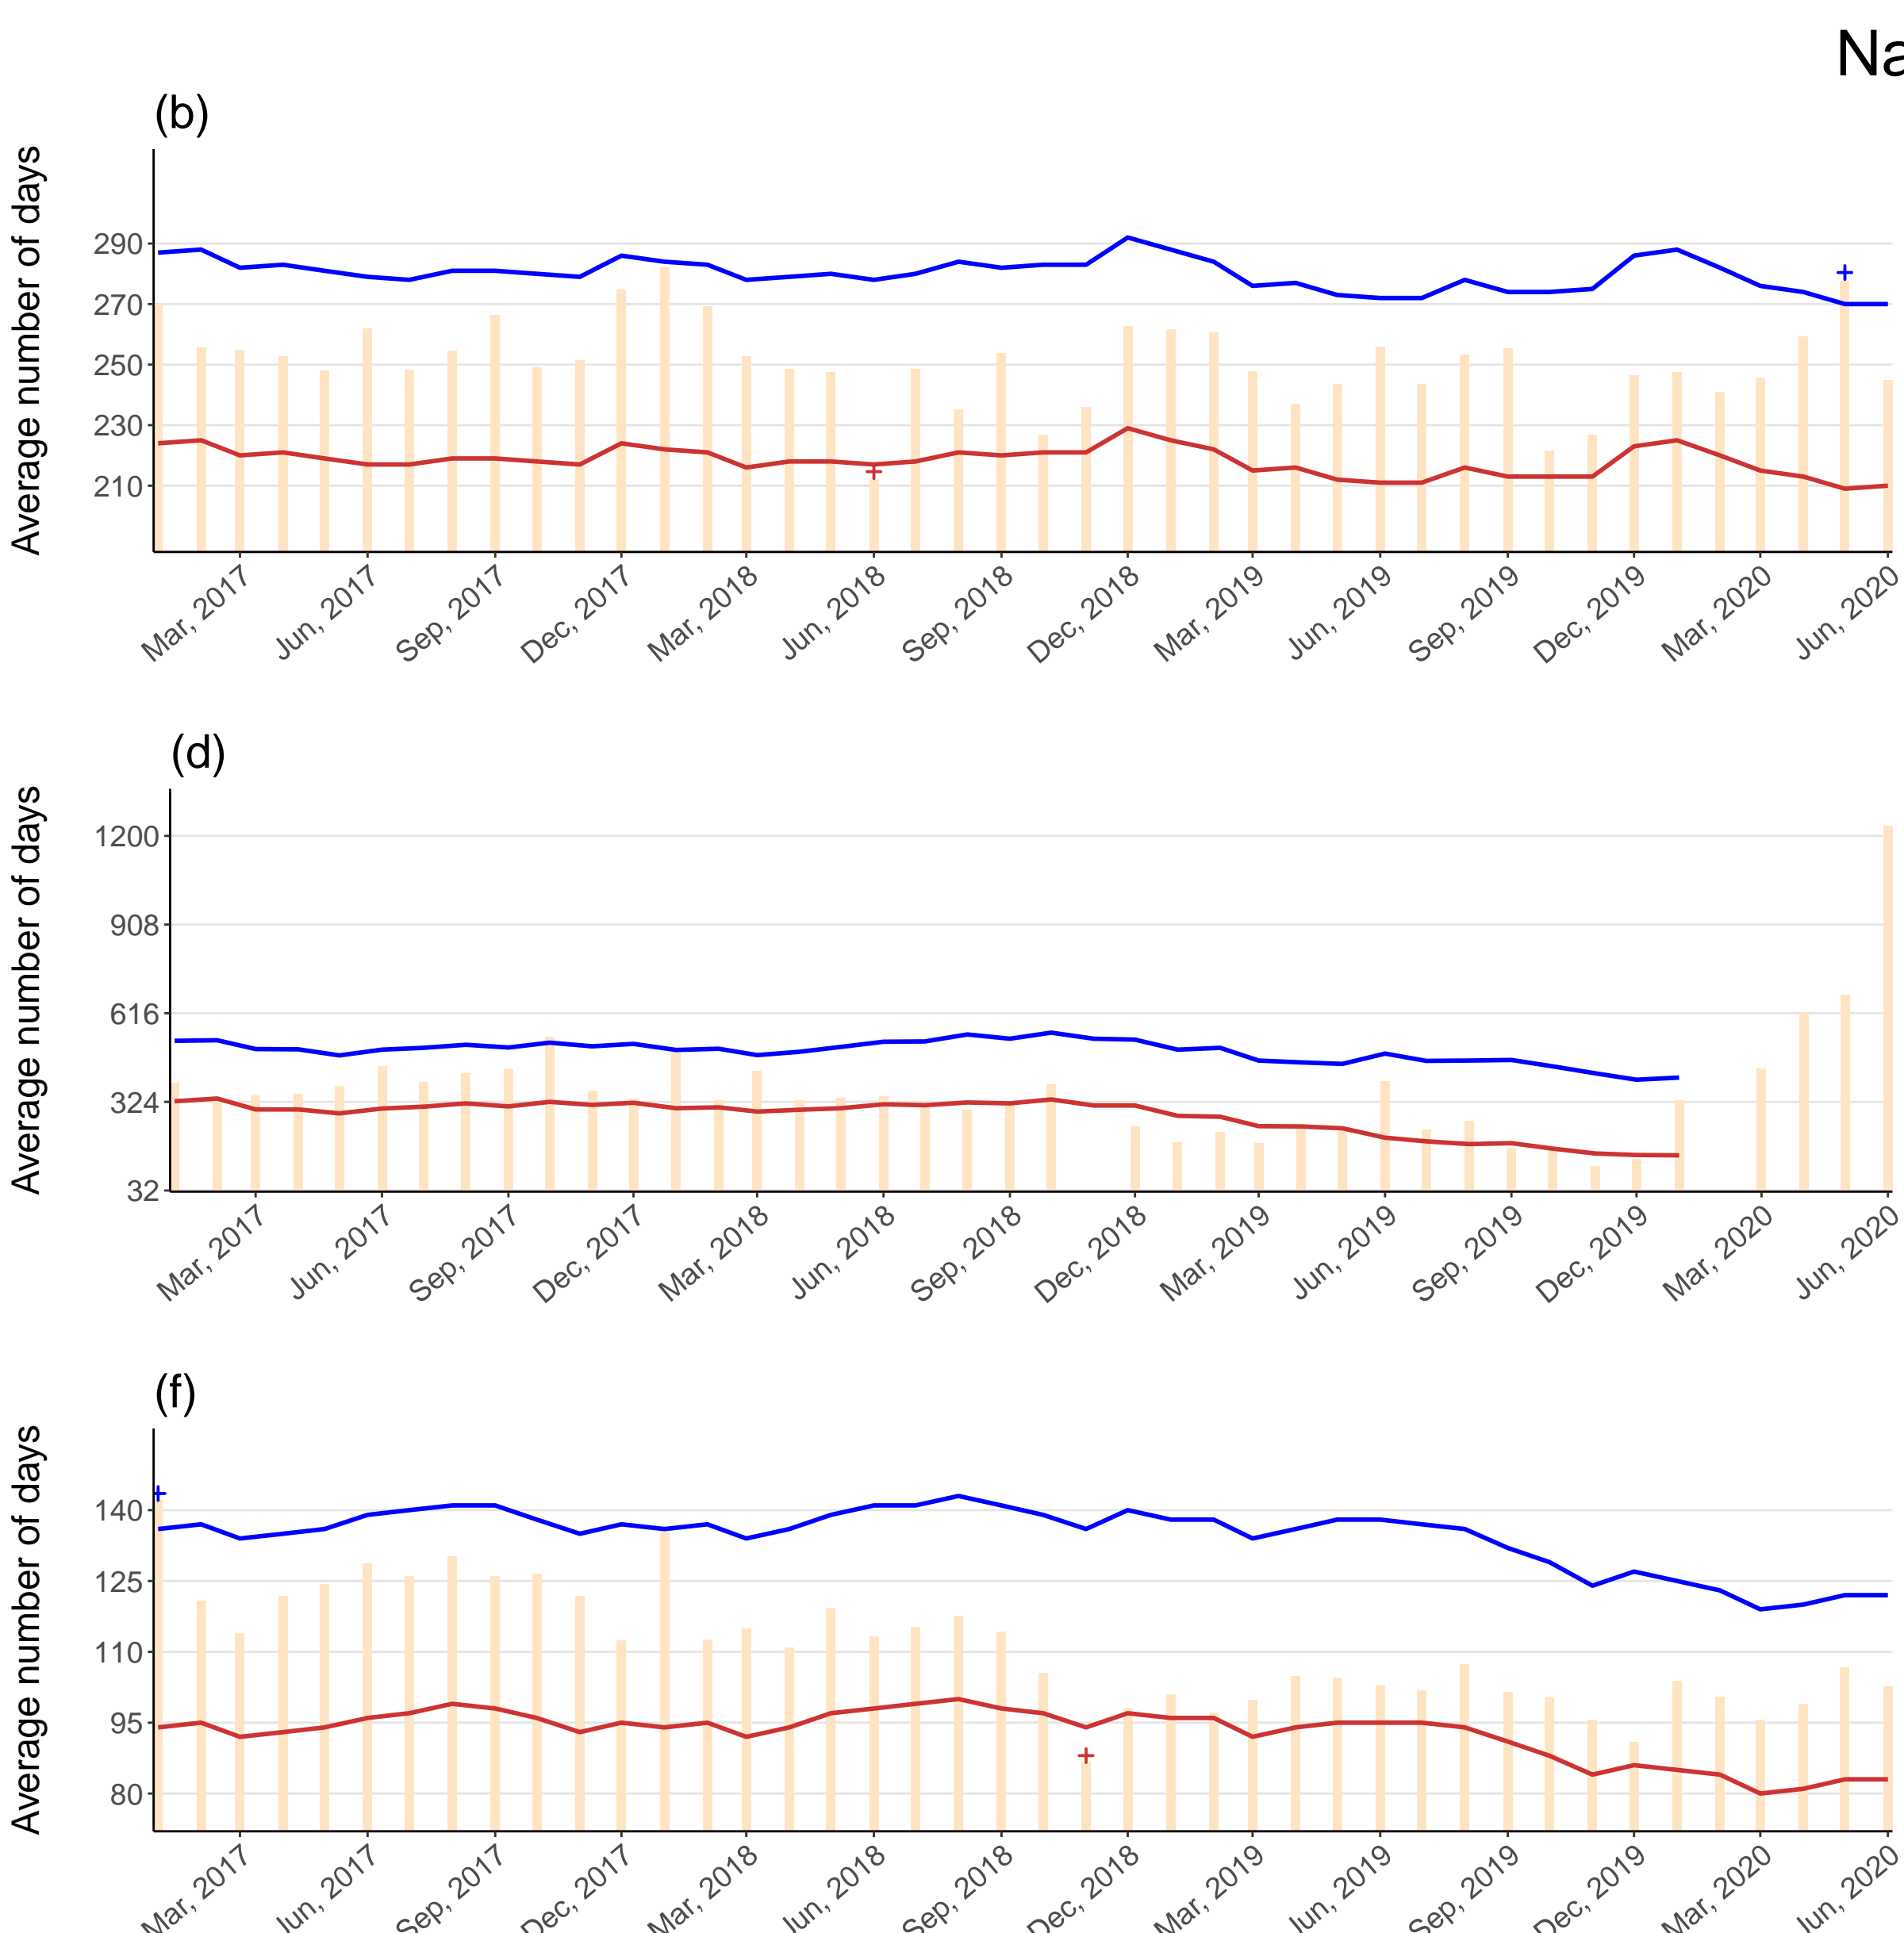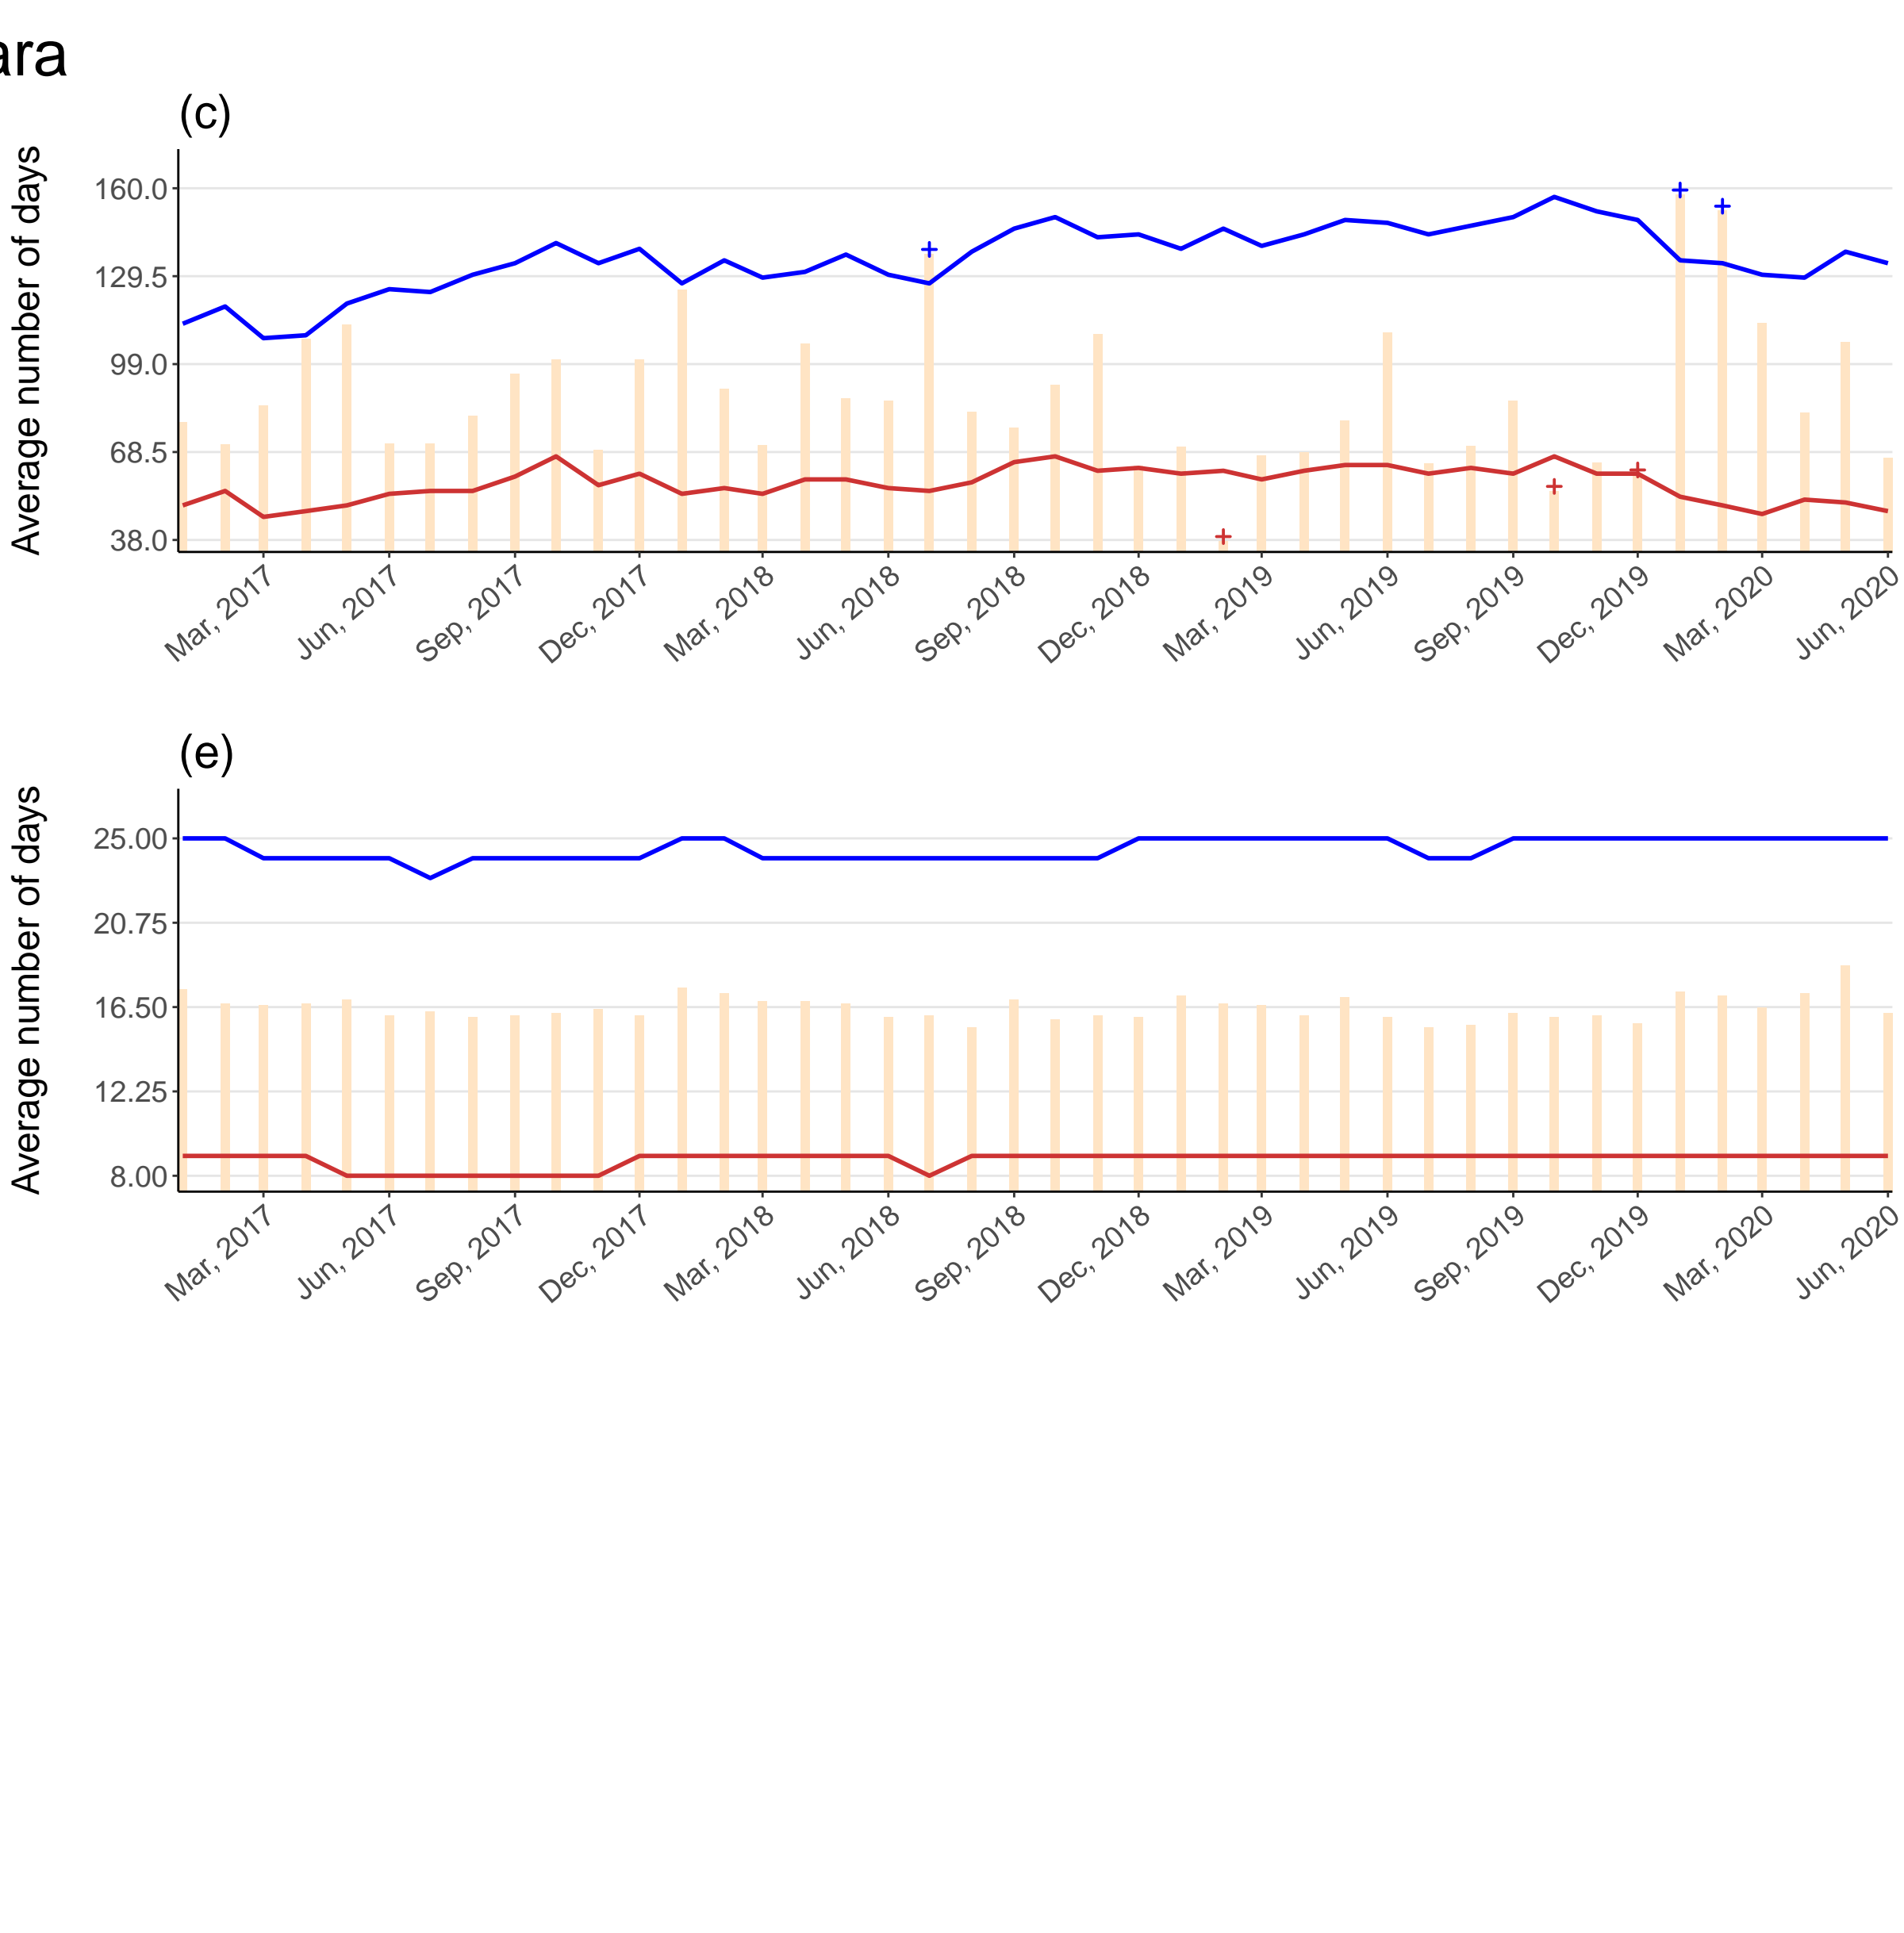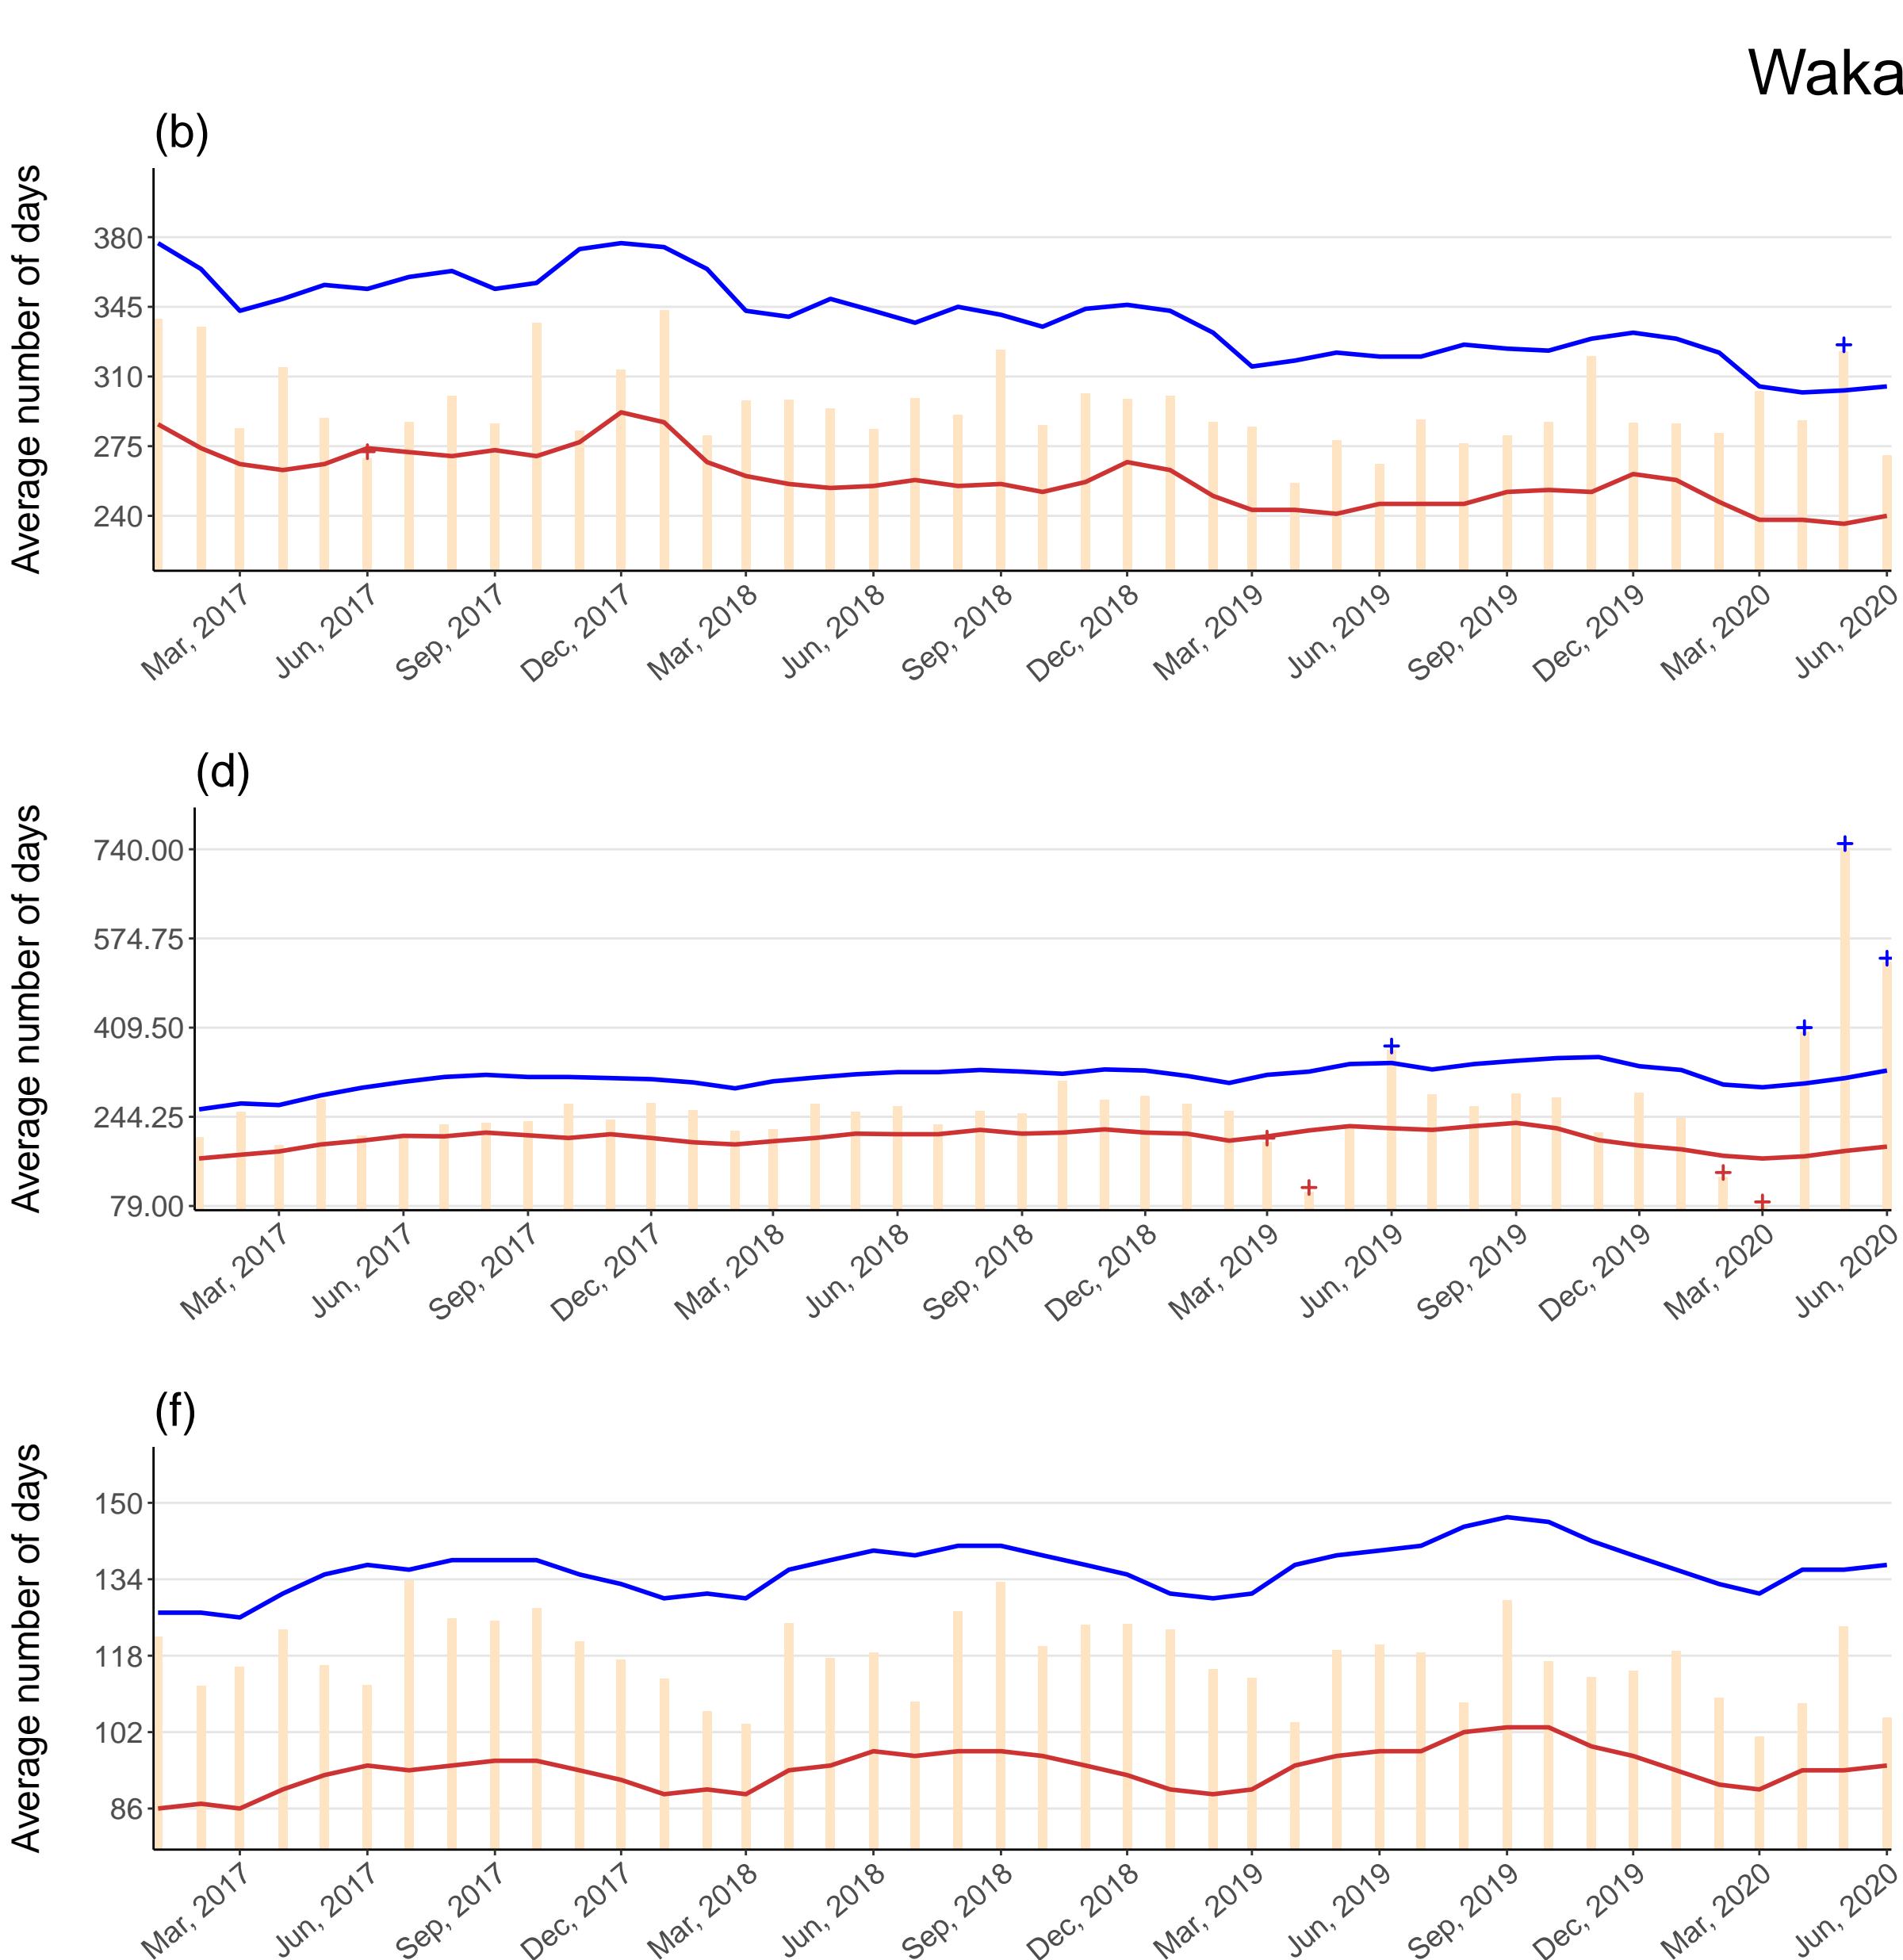

Nara

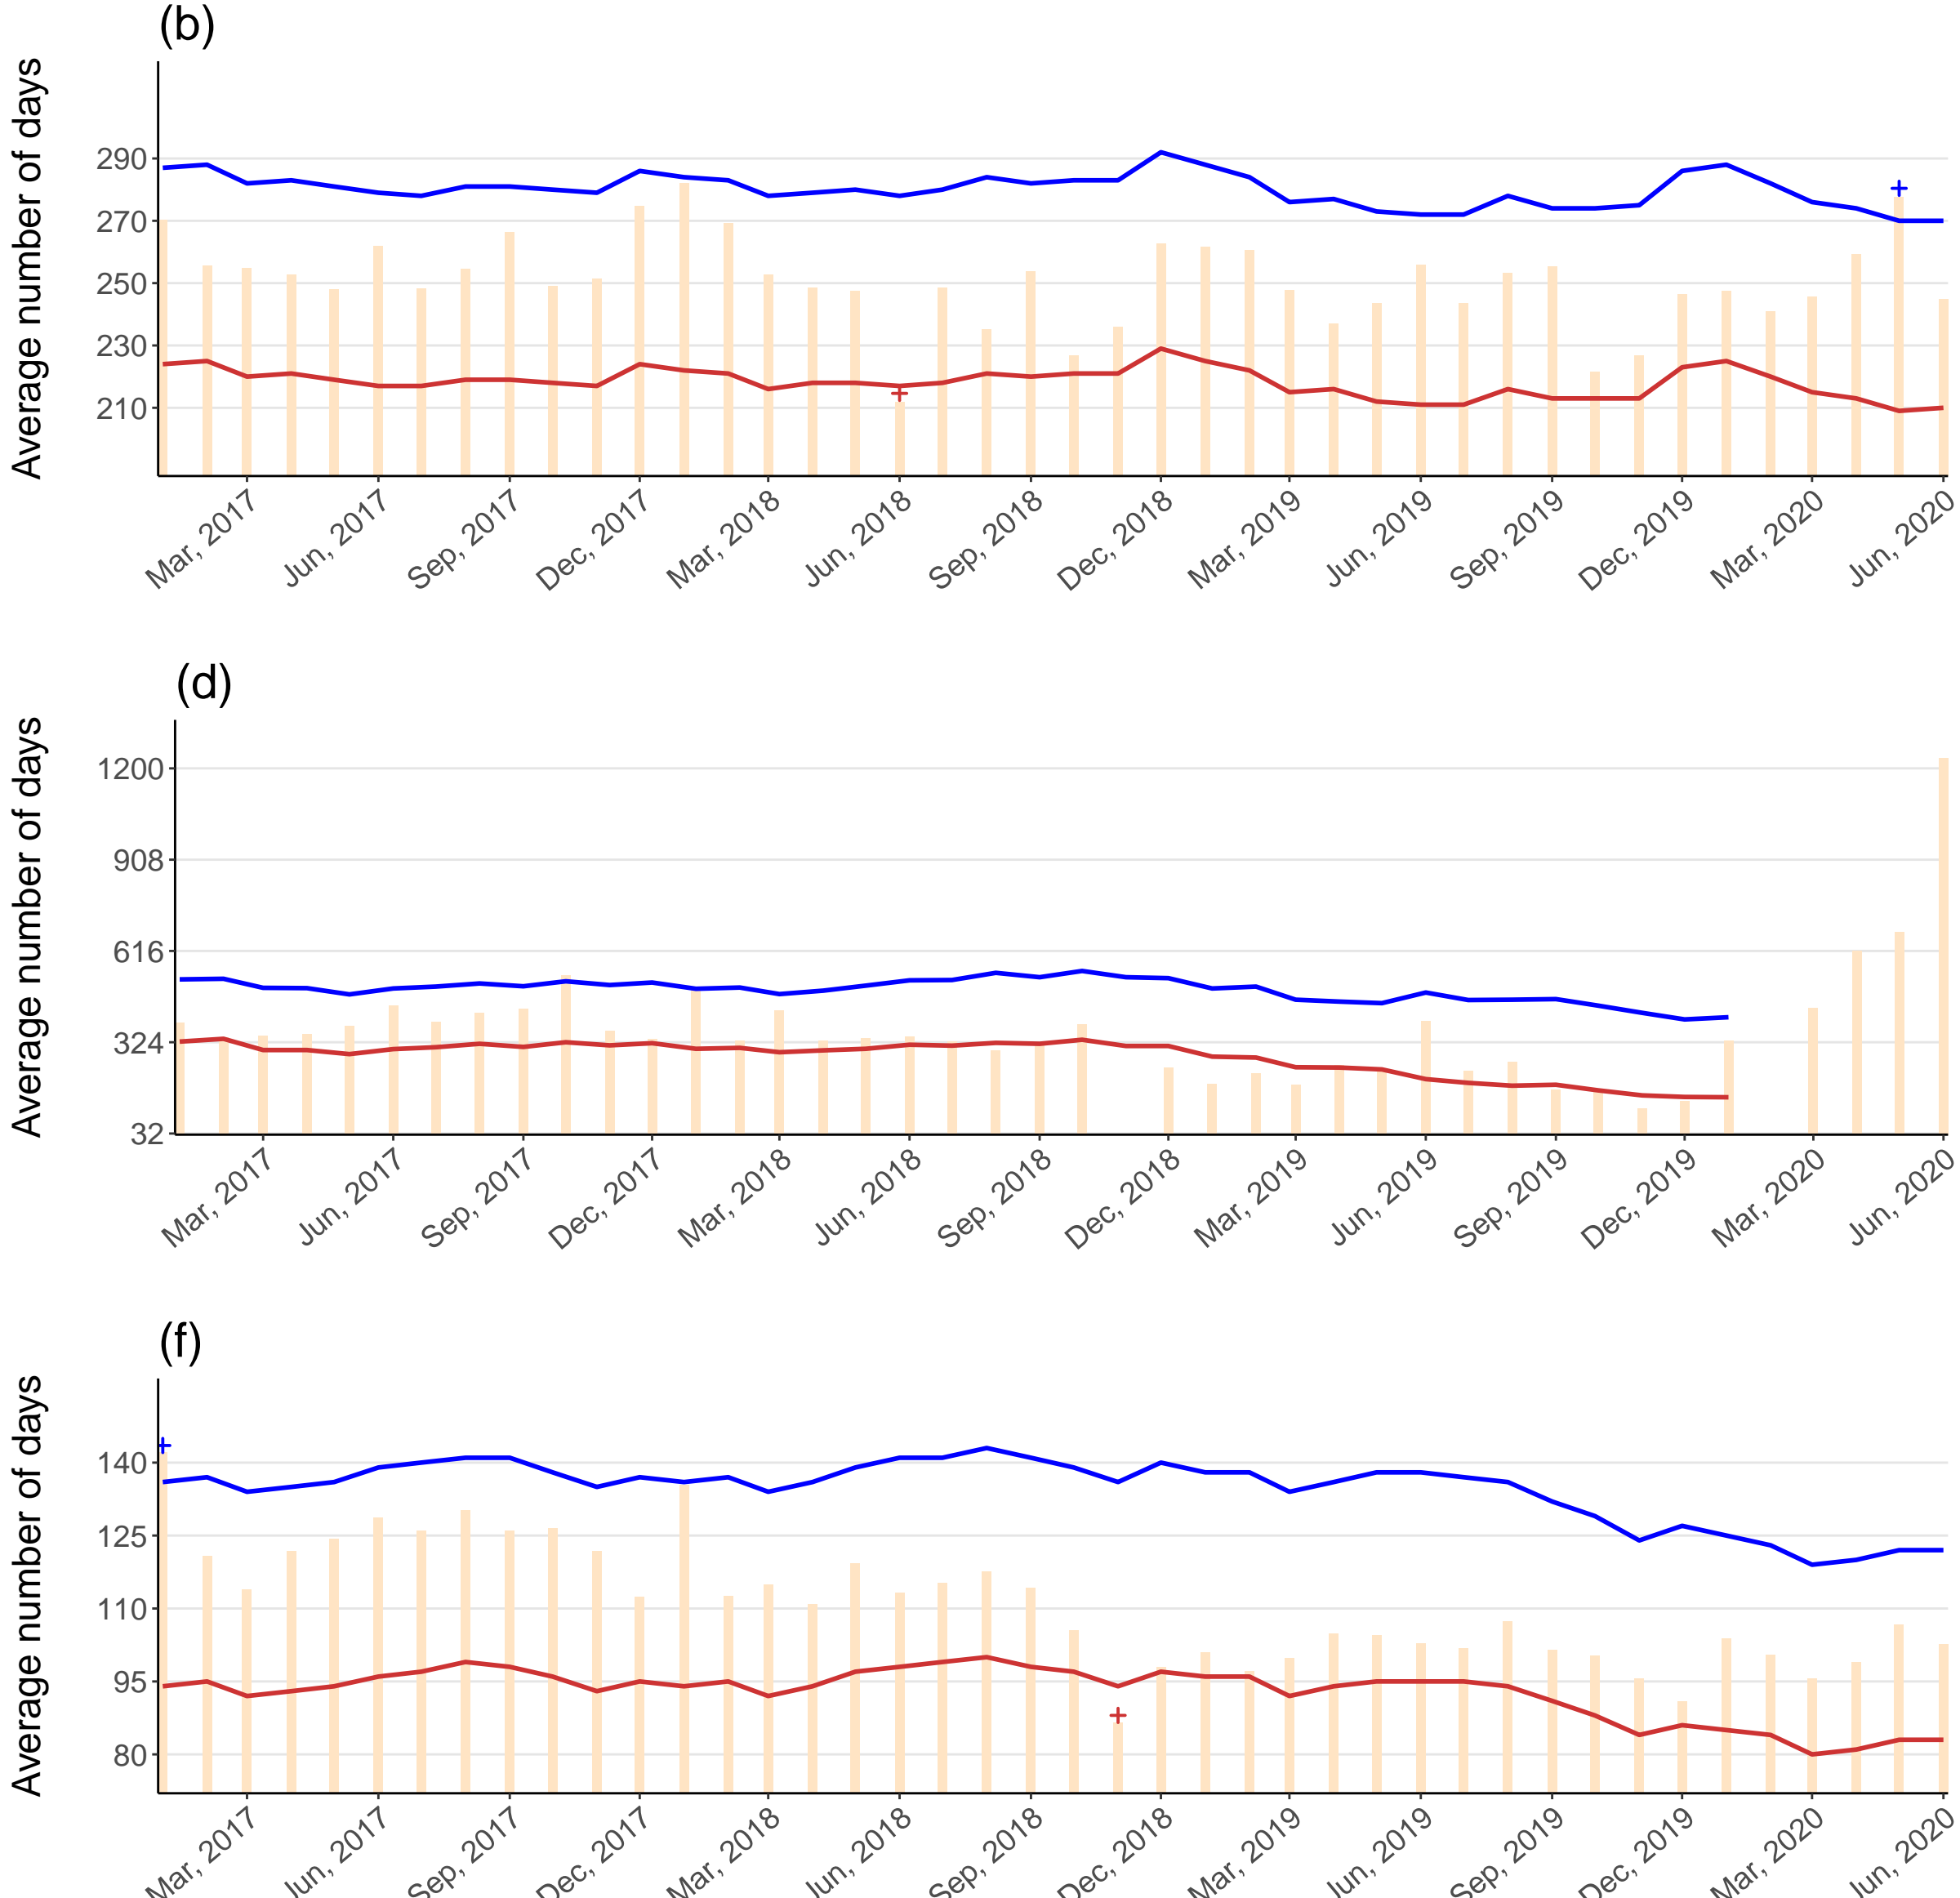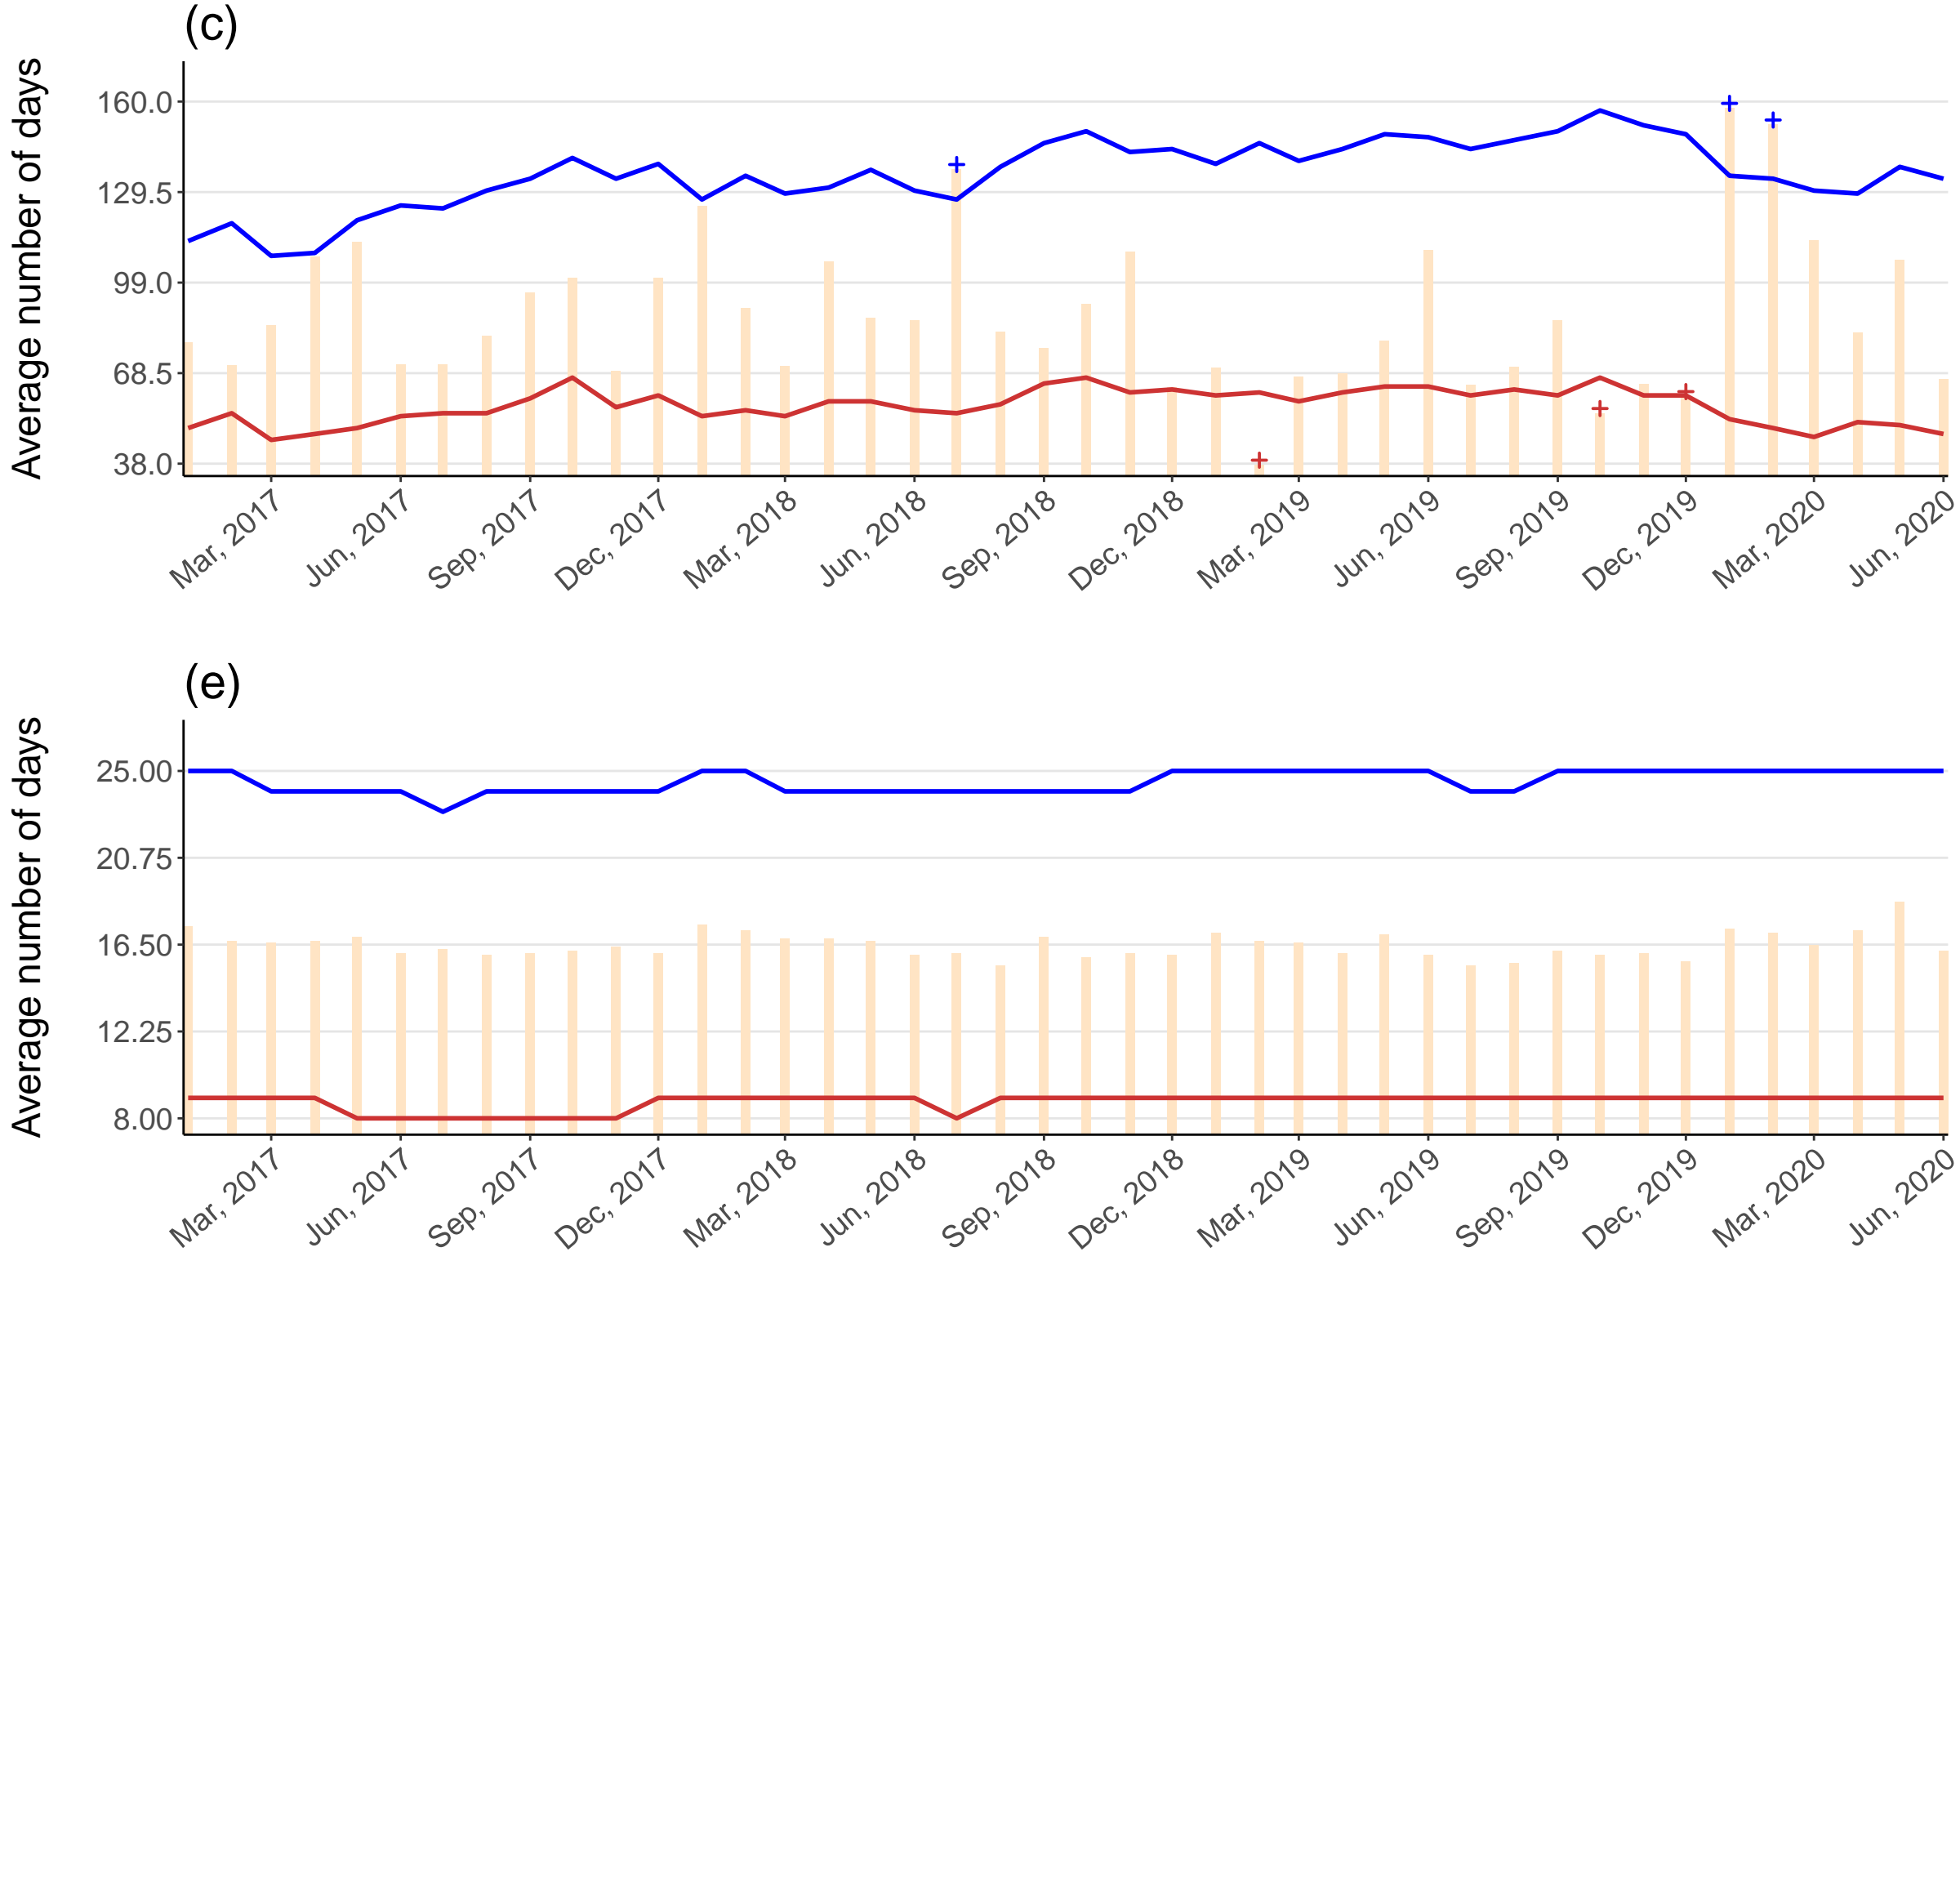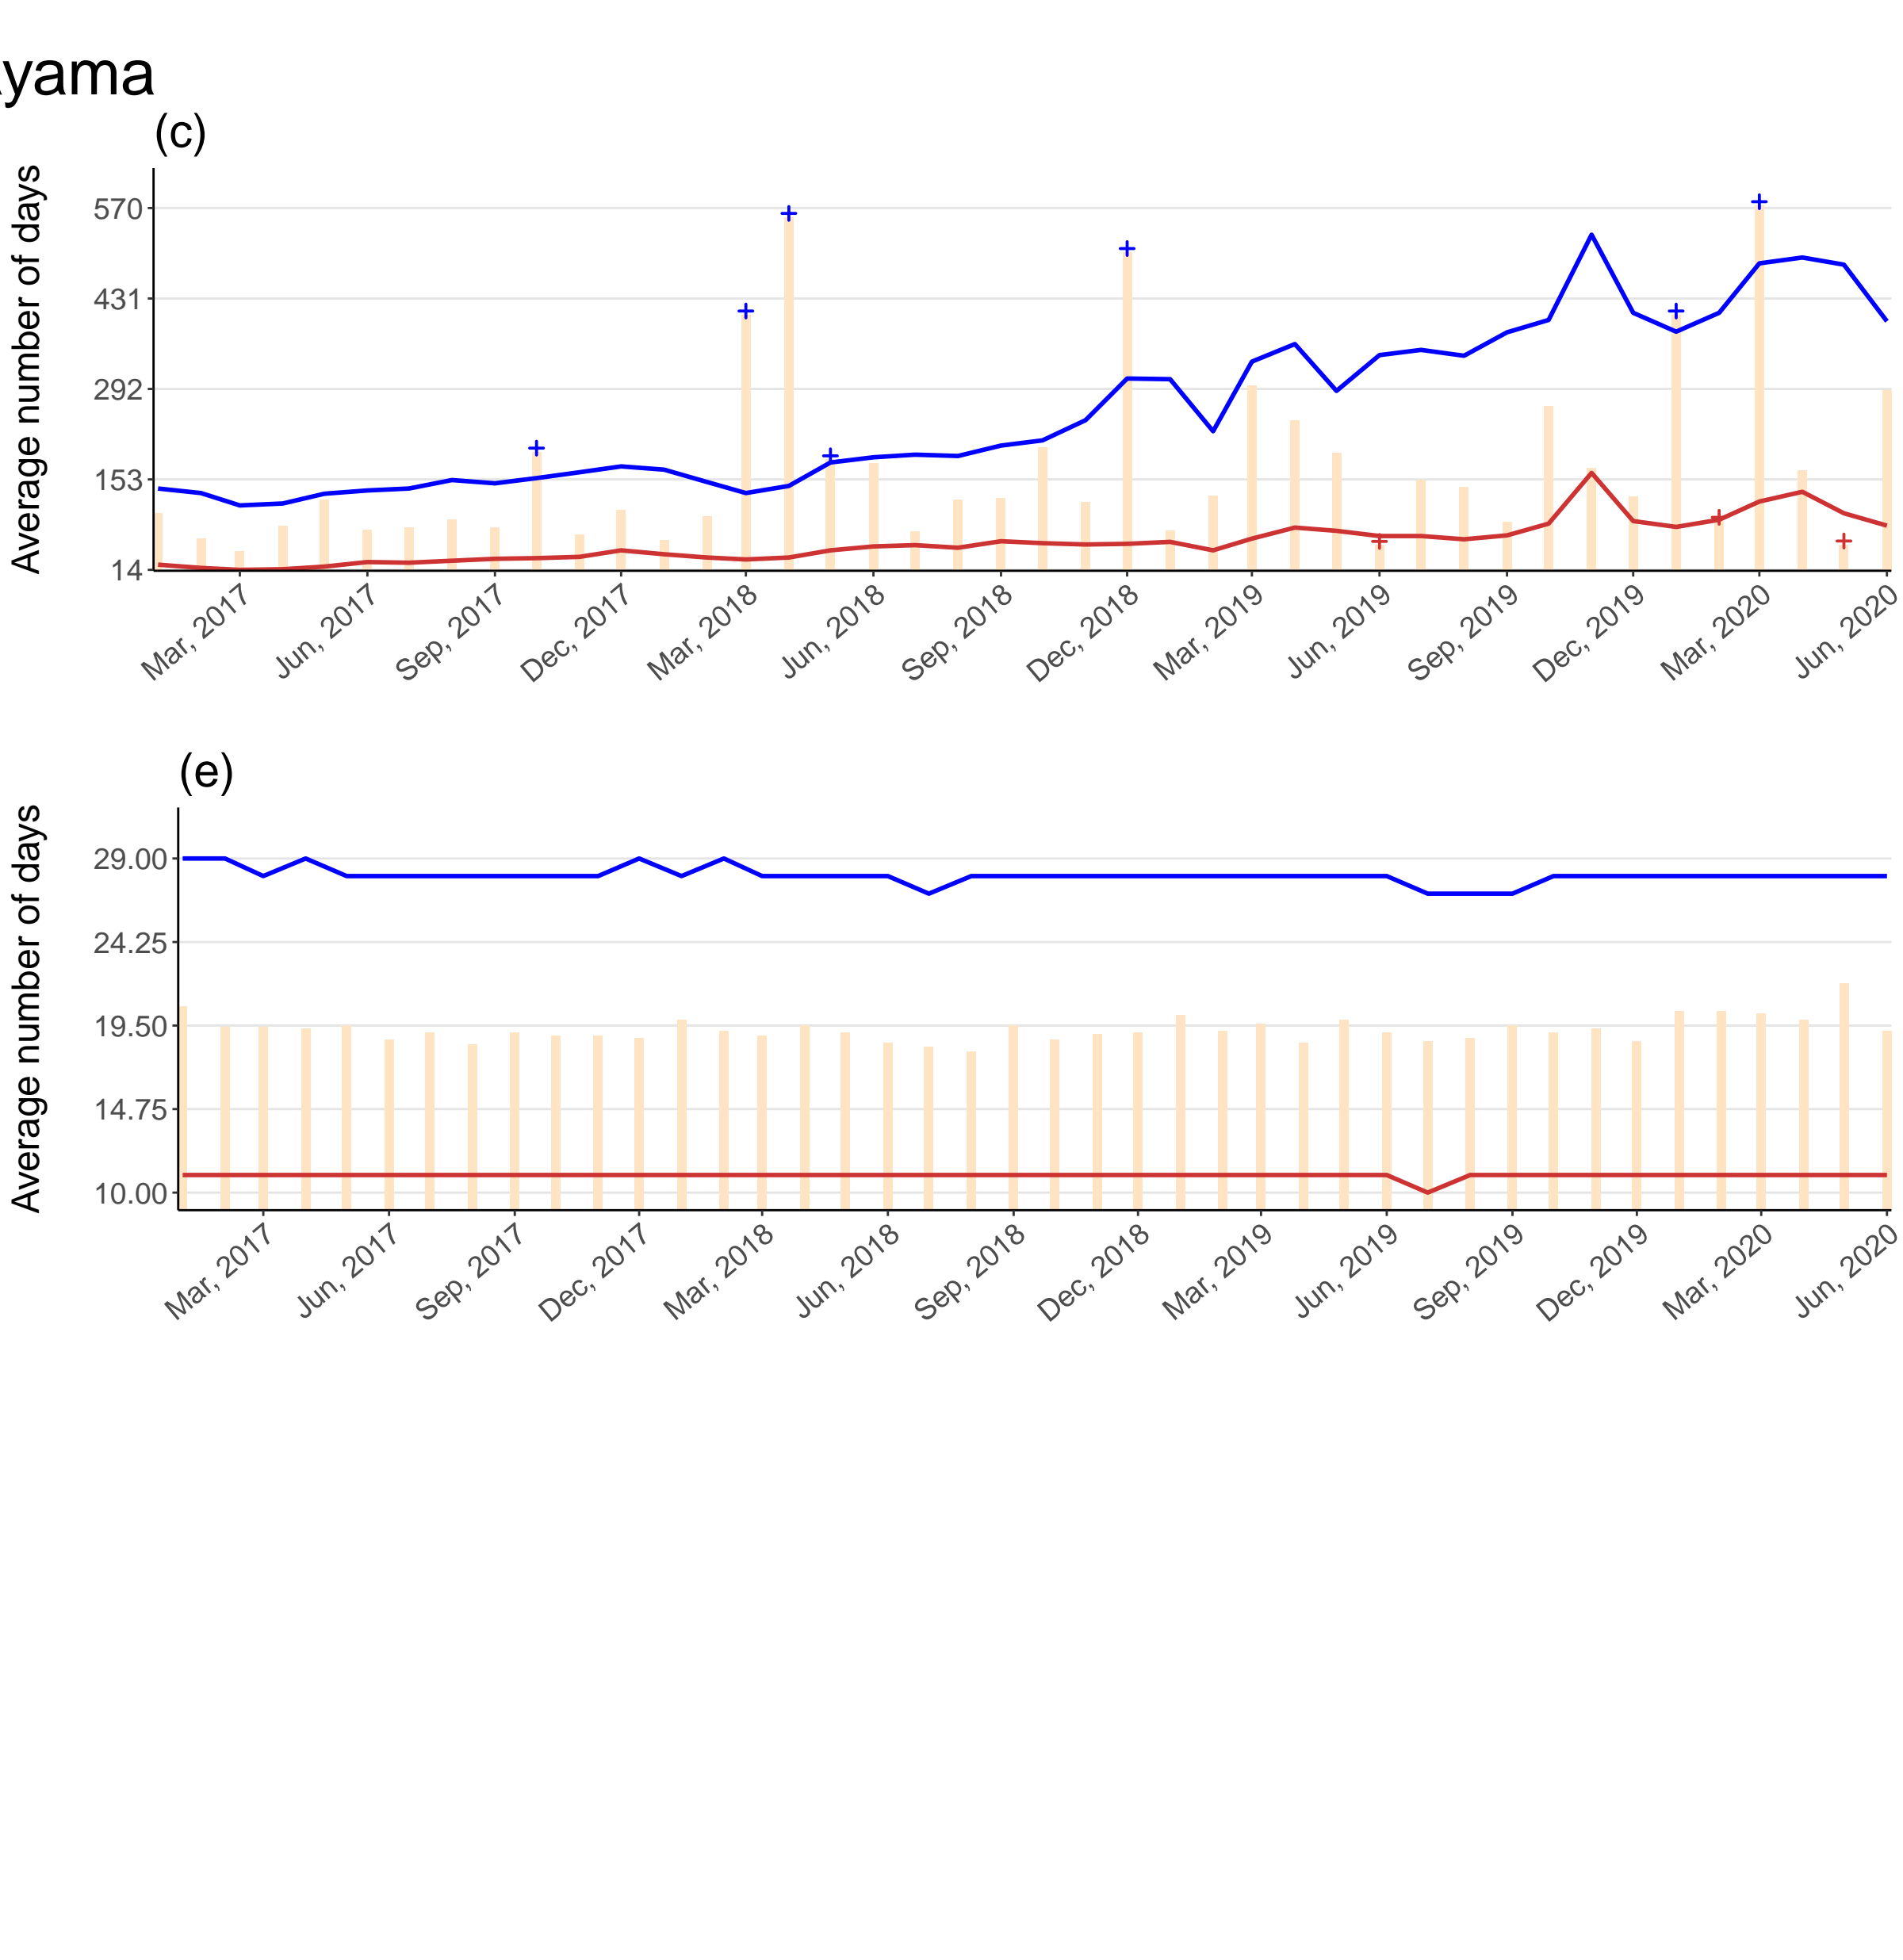

Wakayama

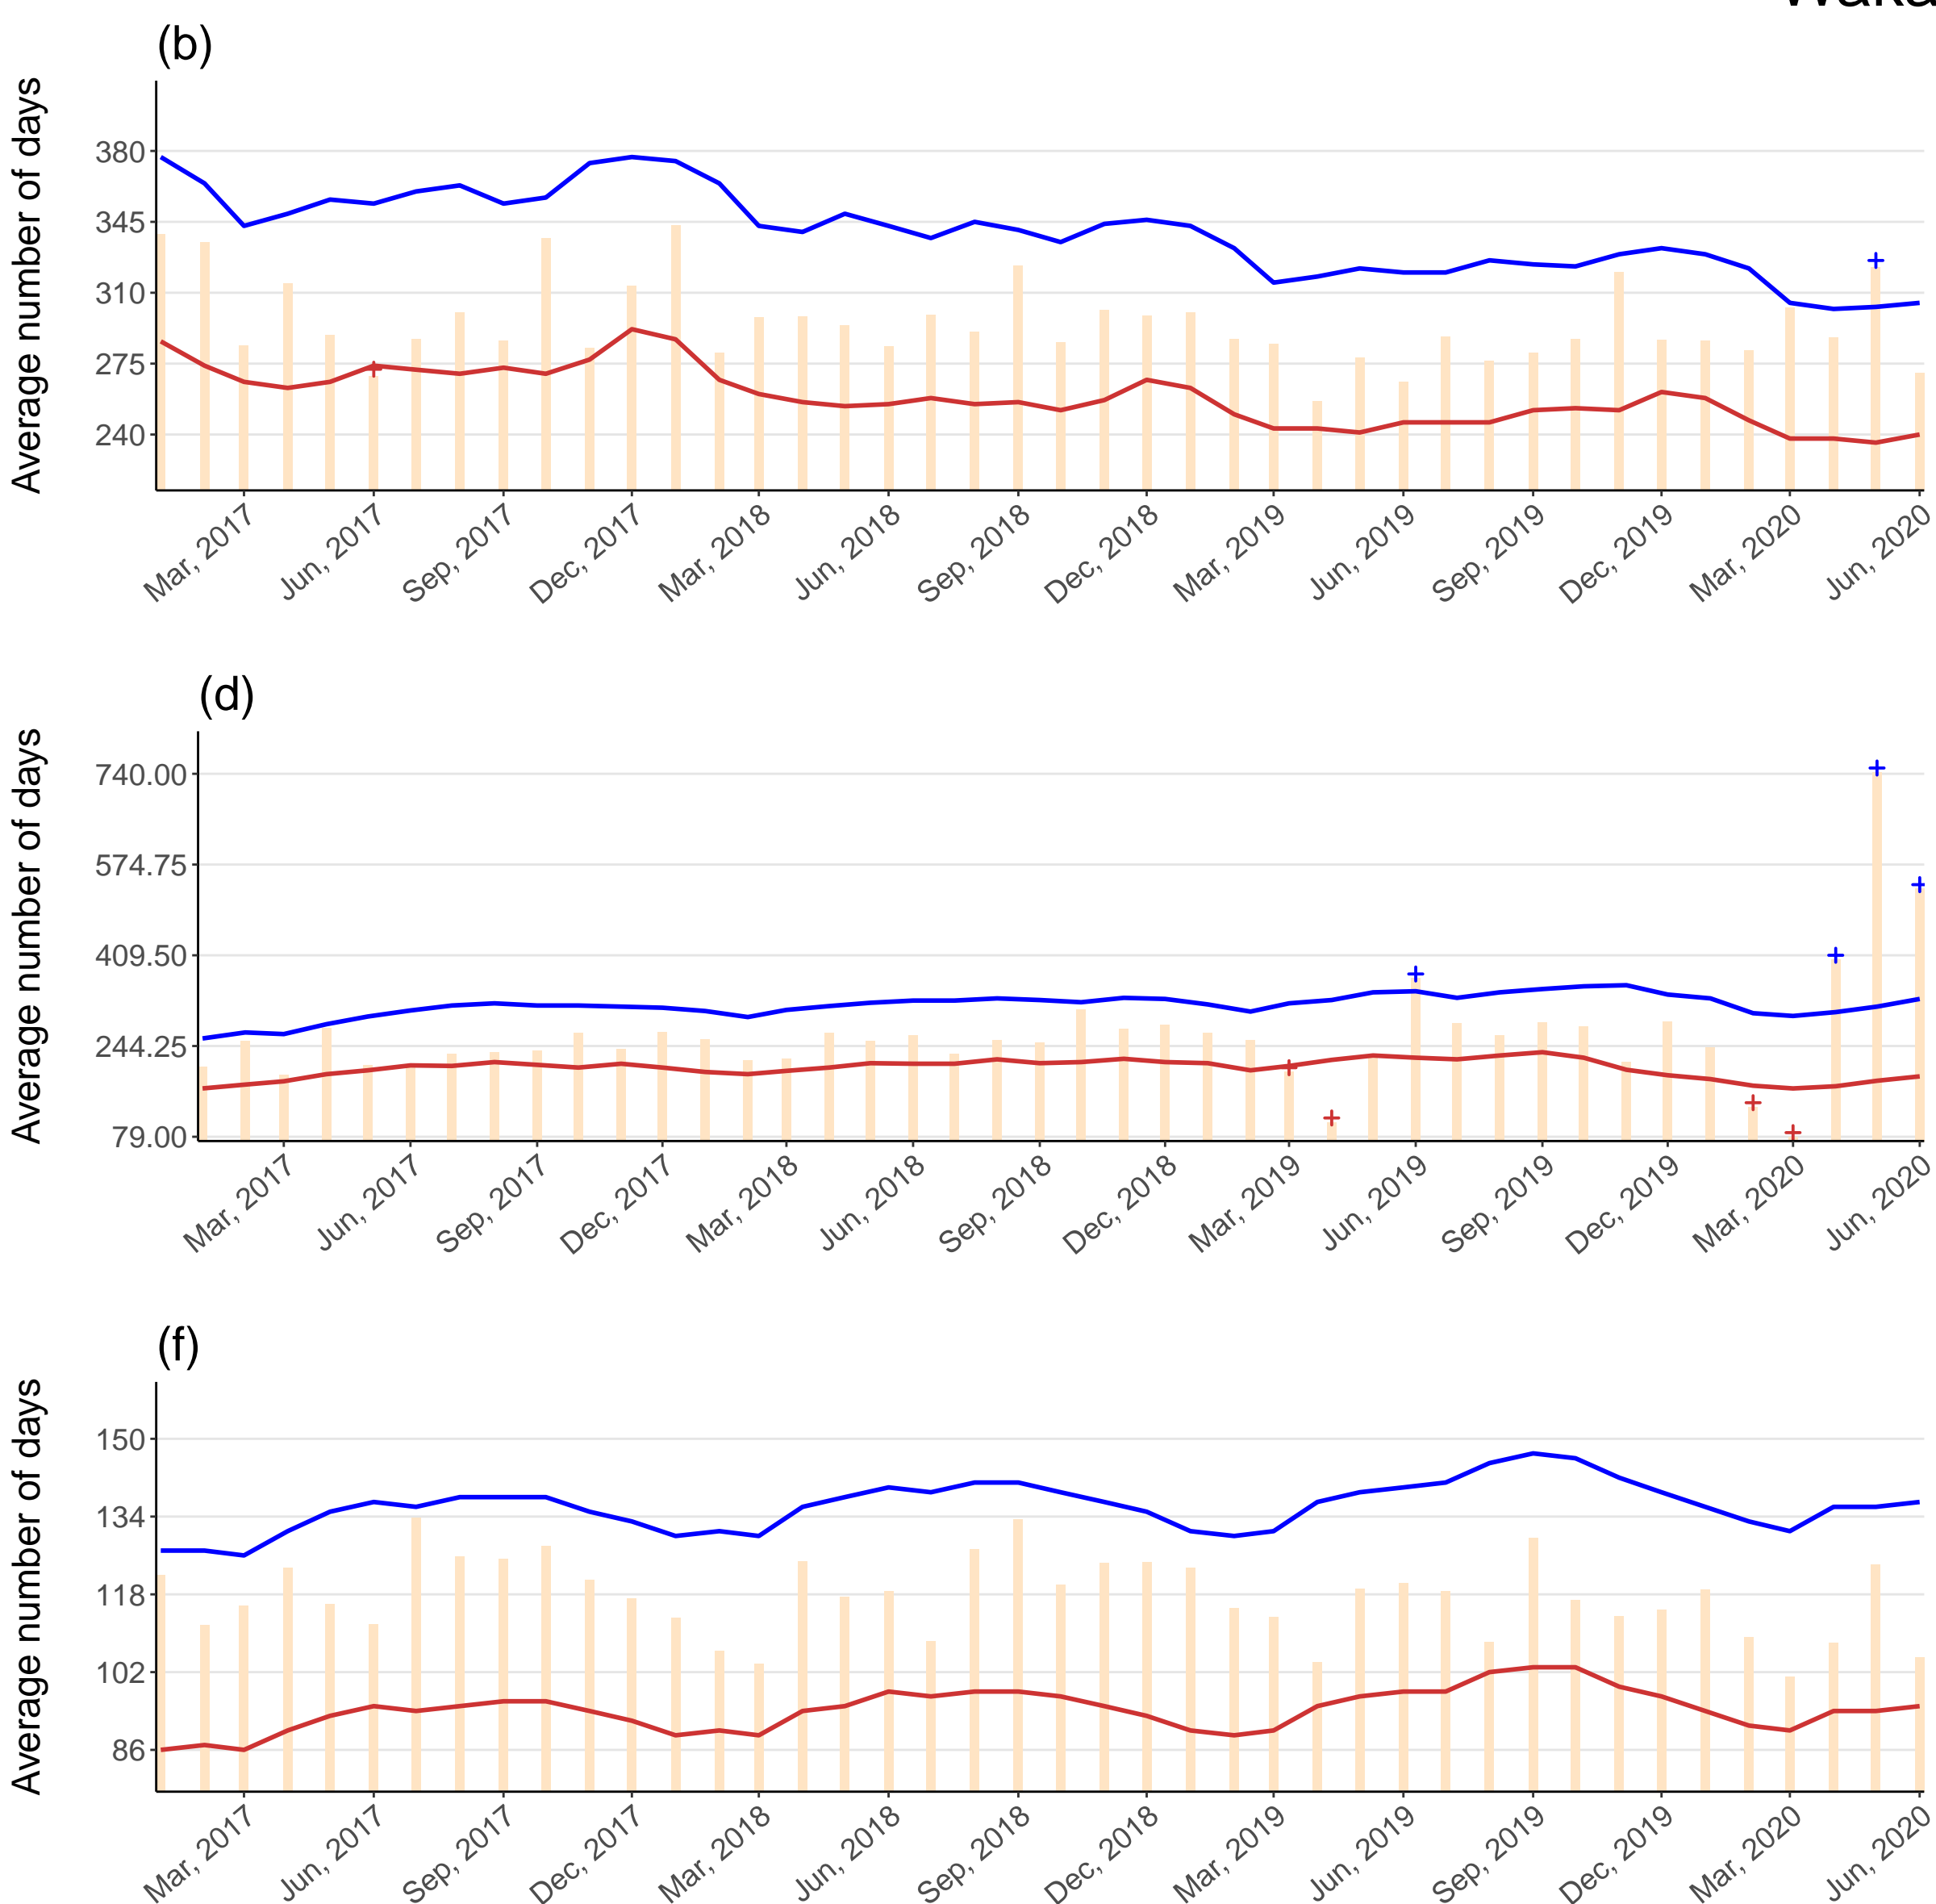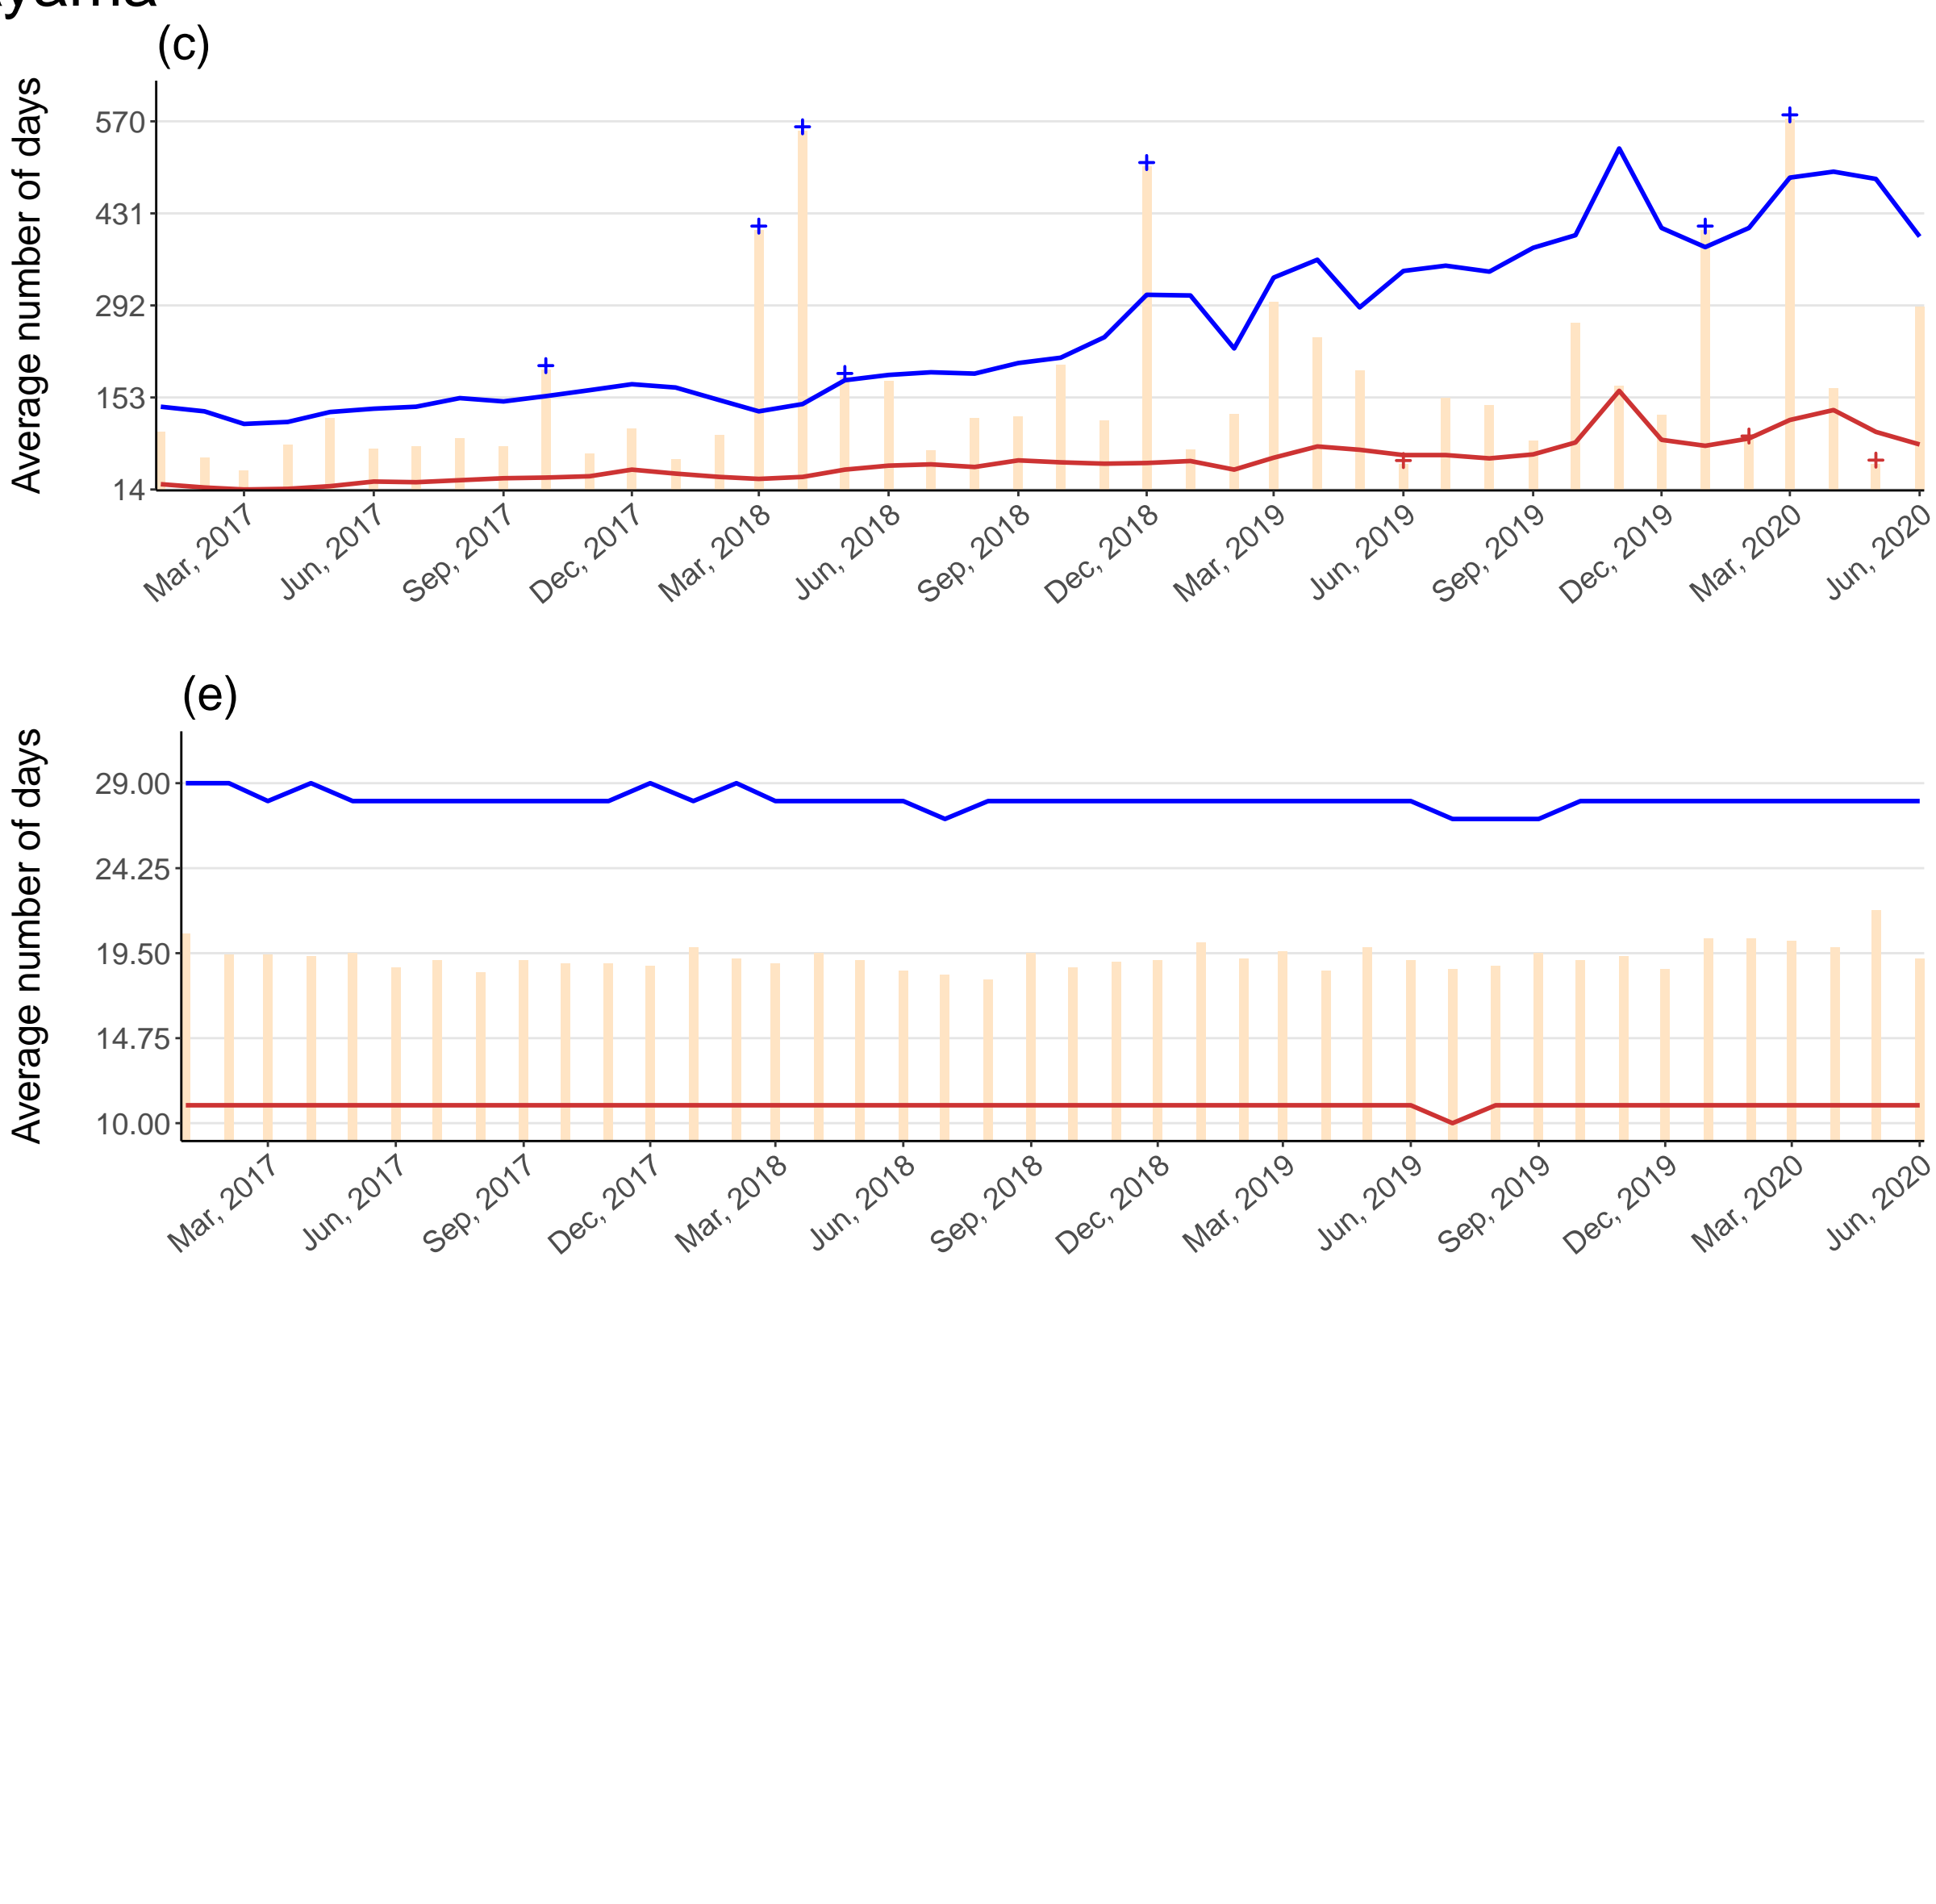



Tottori

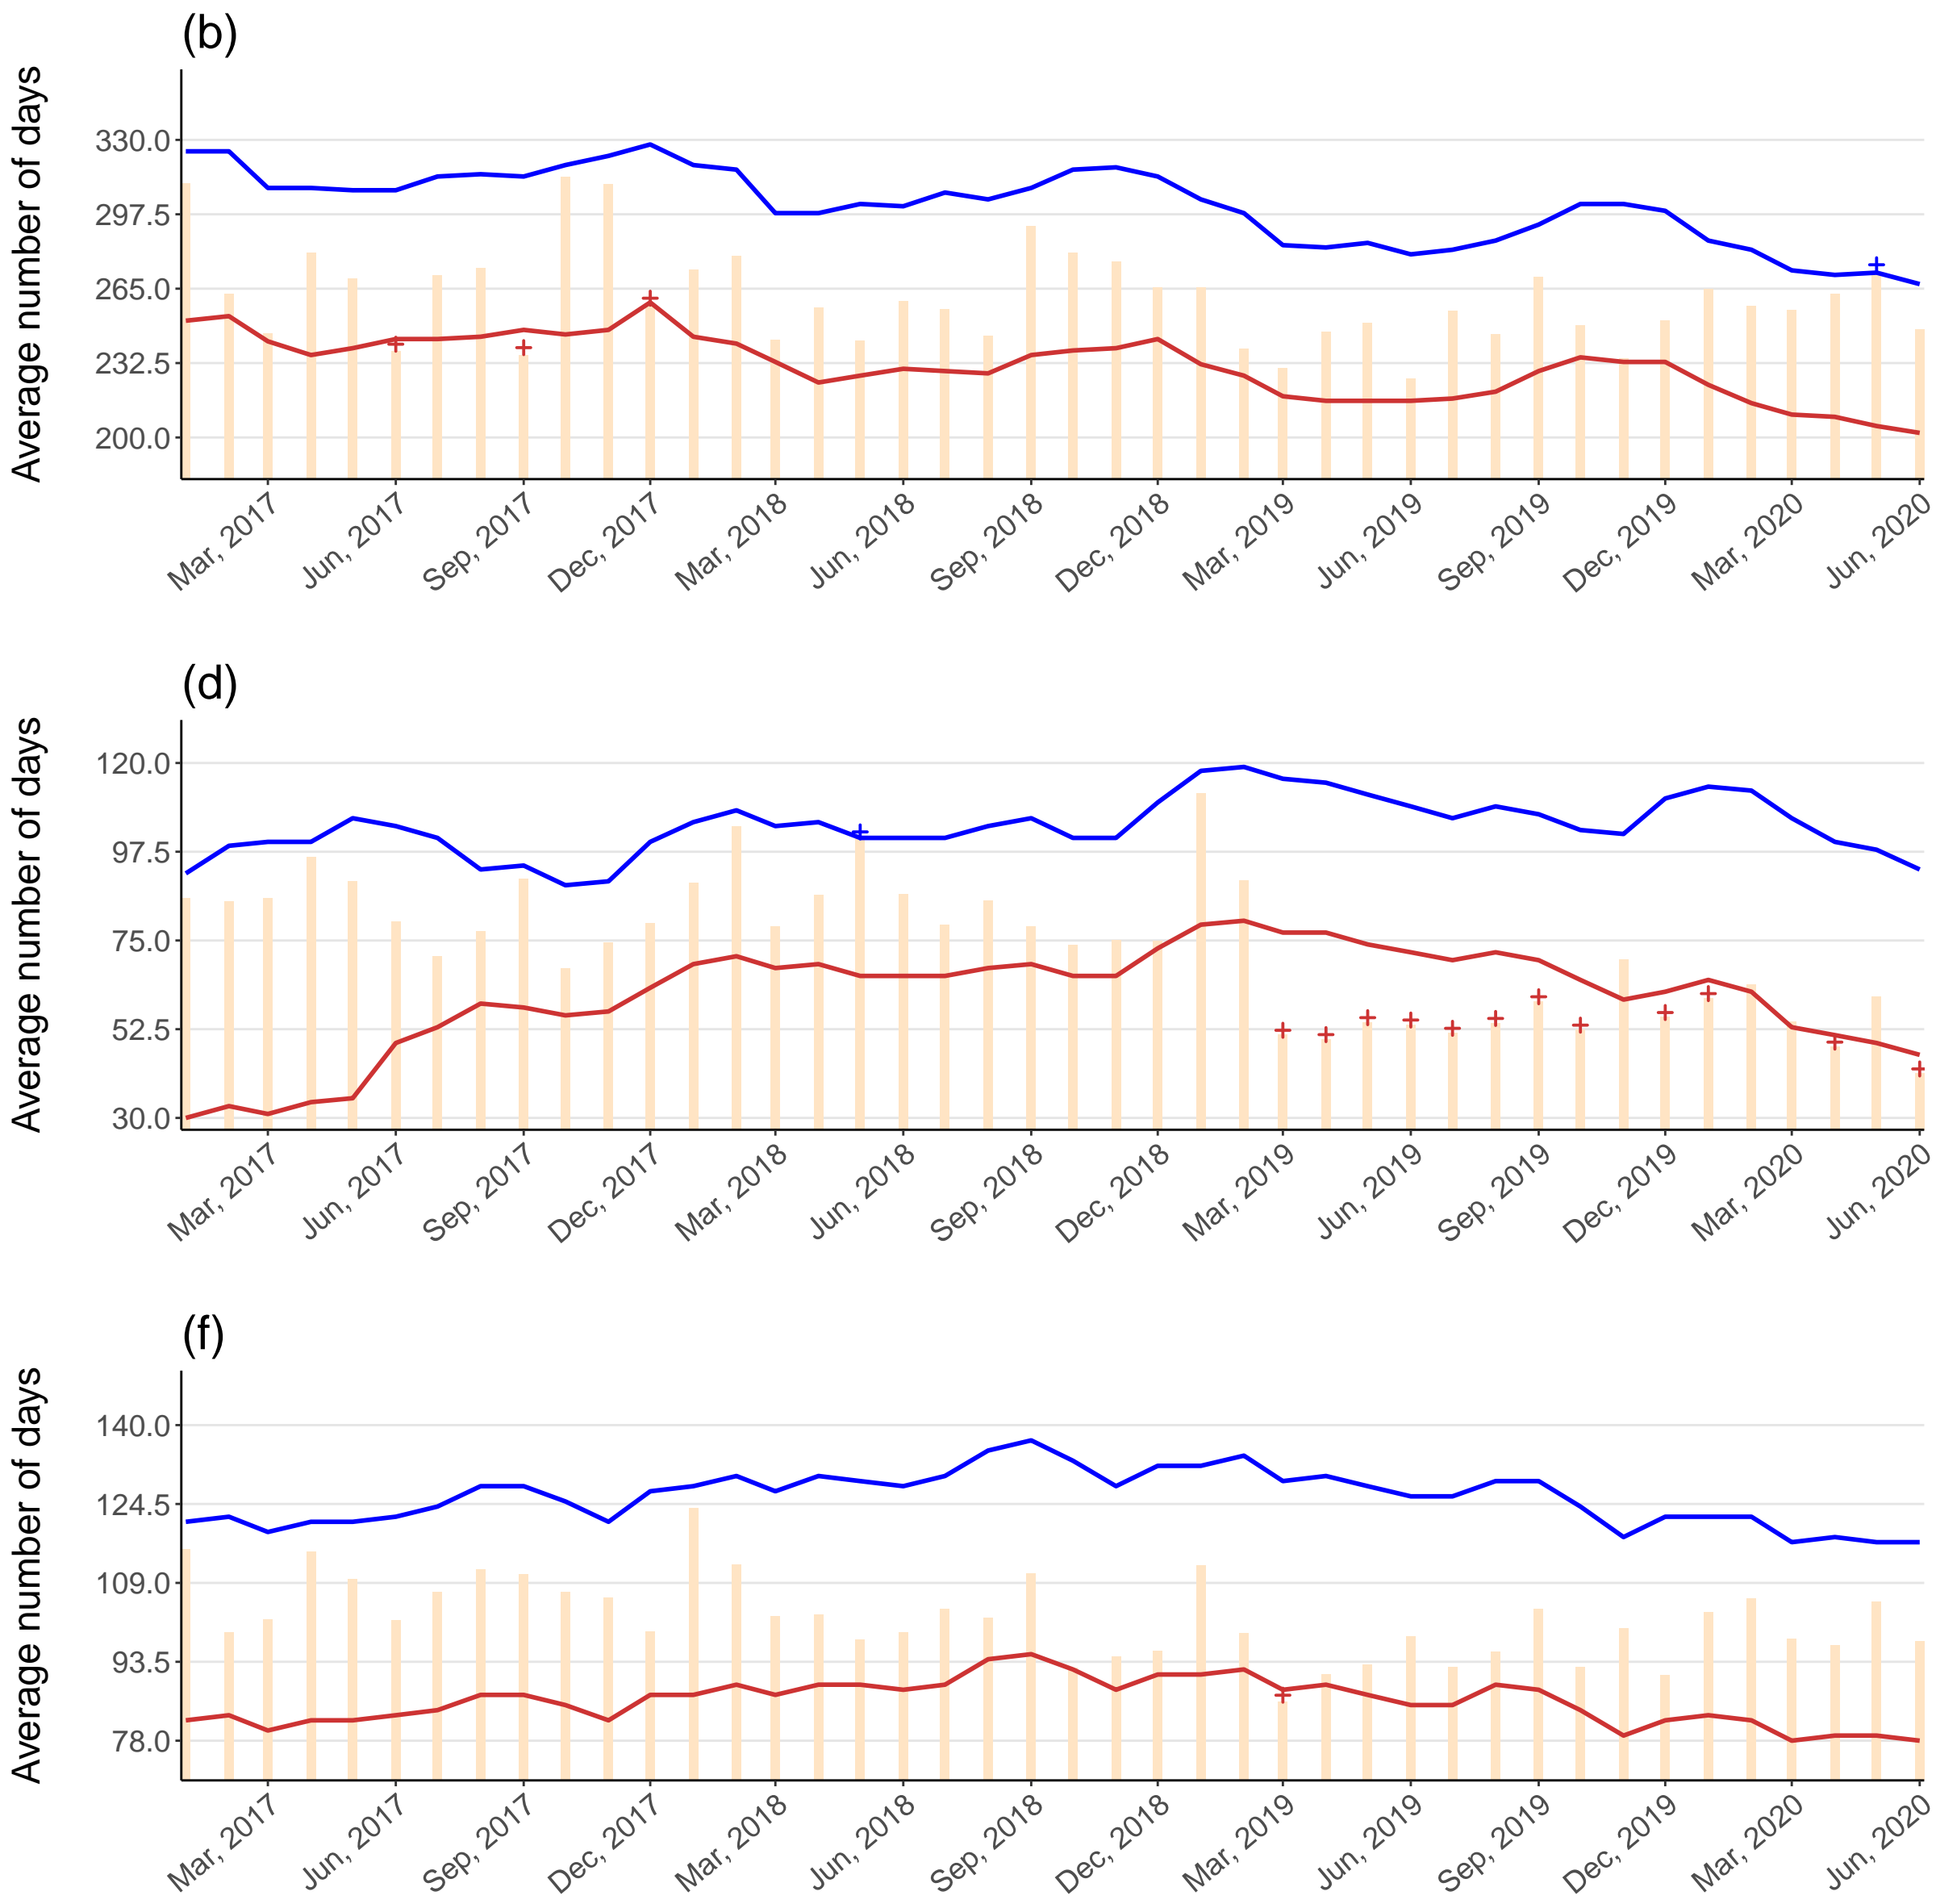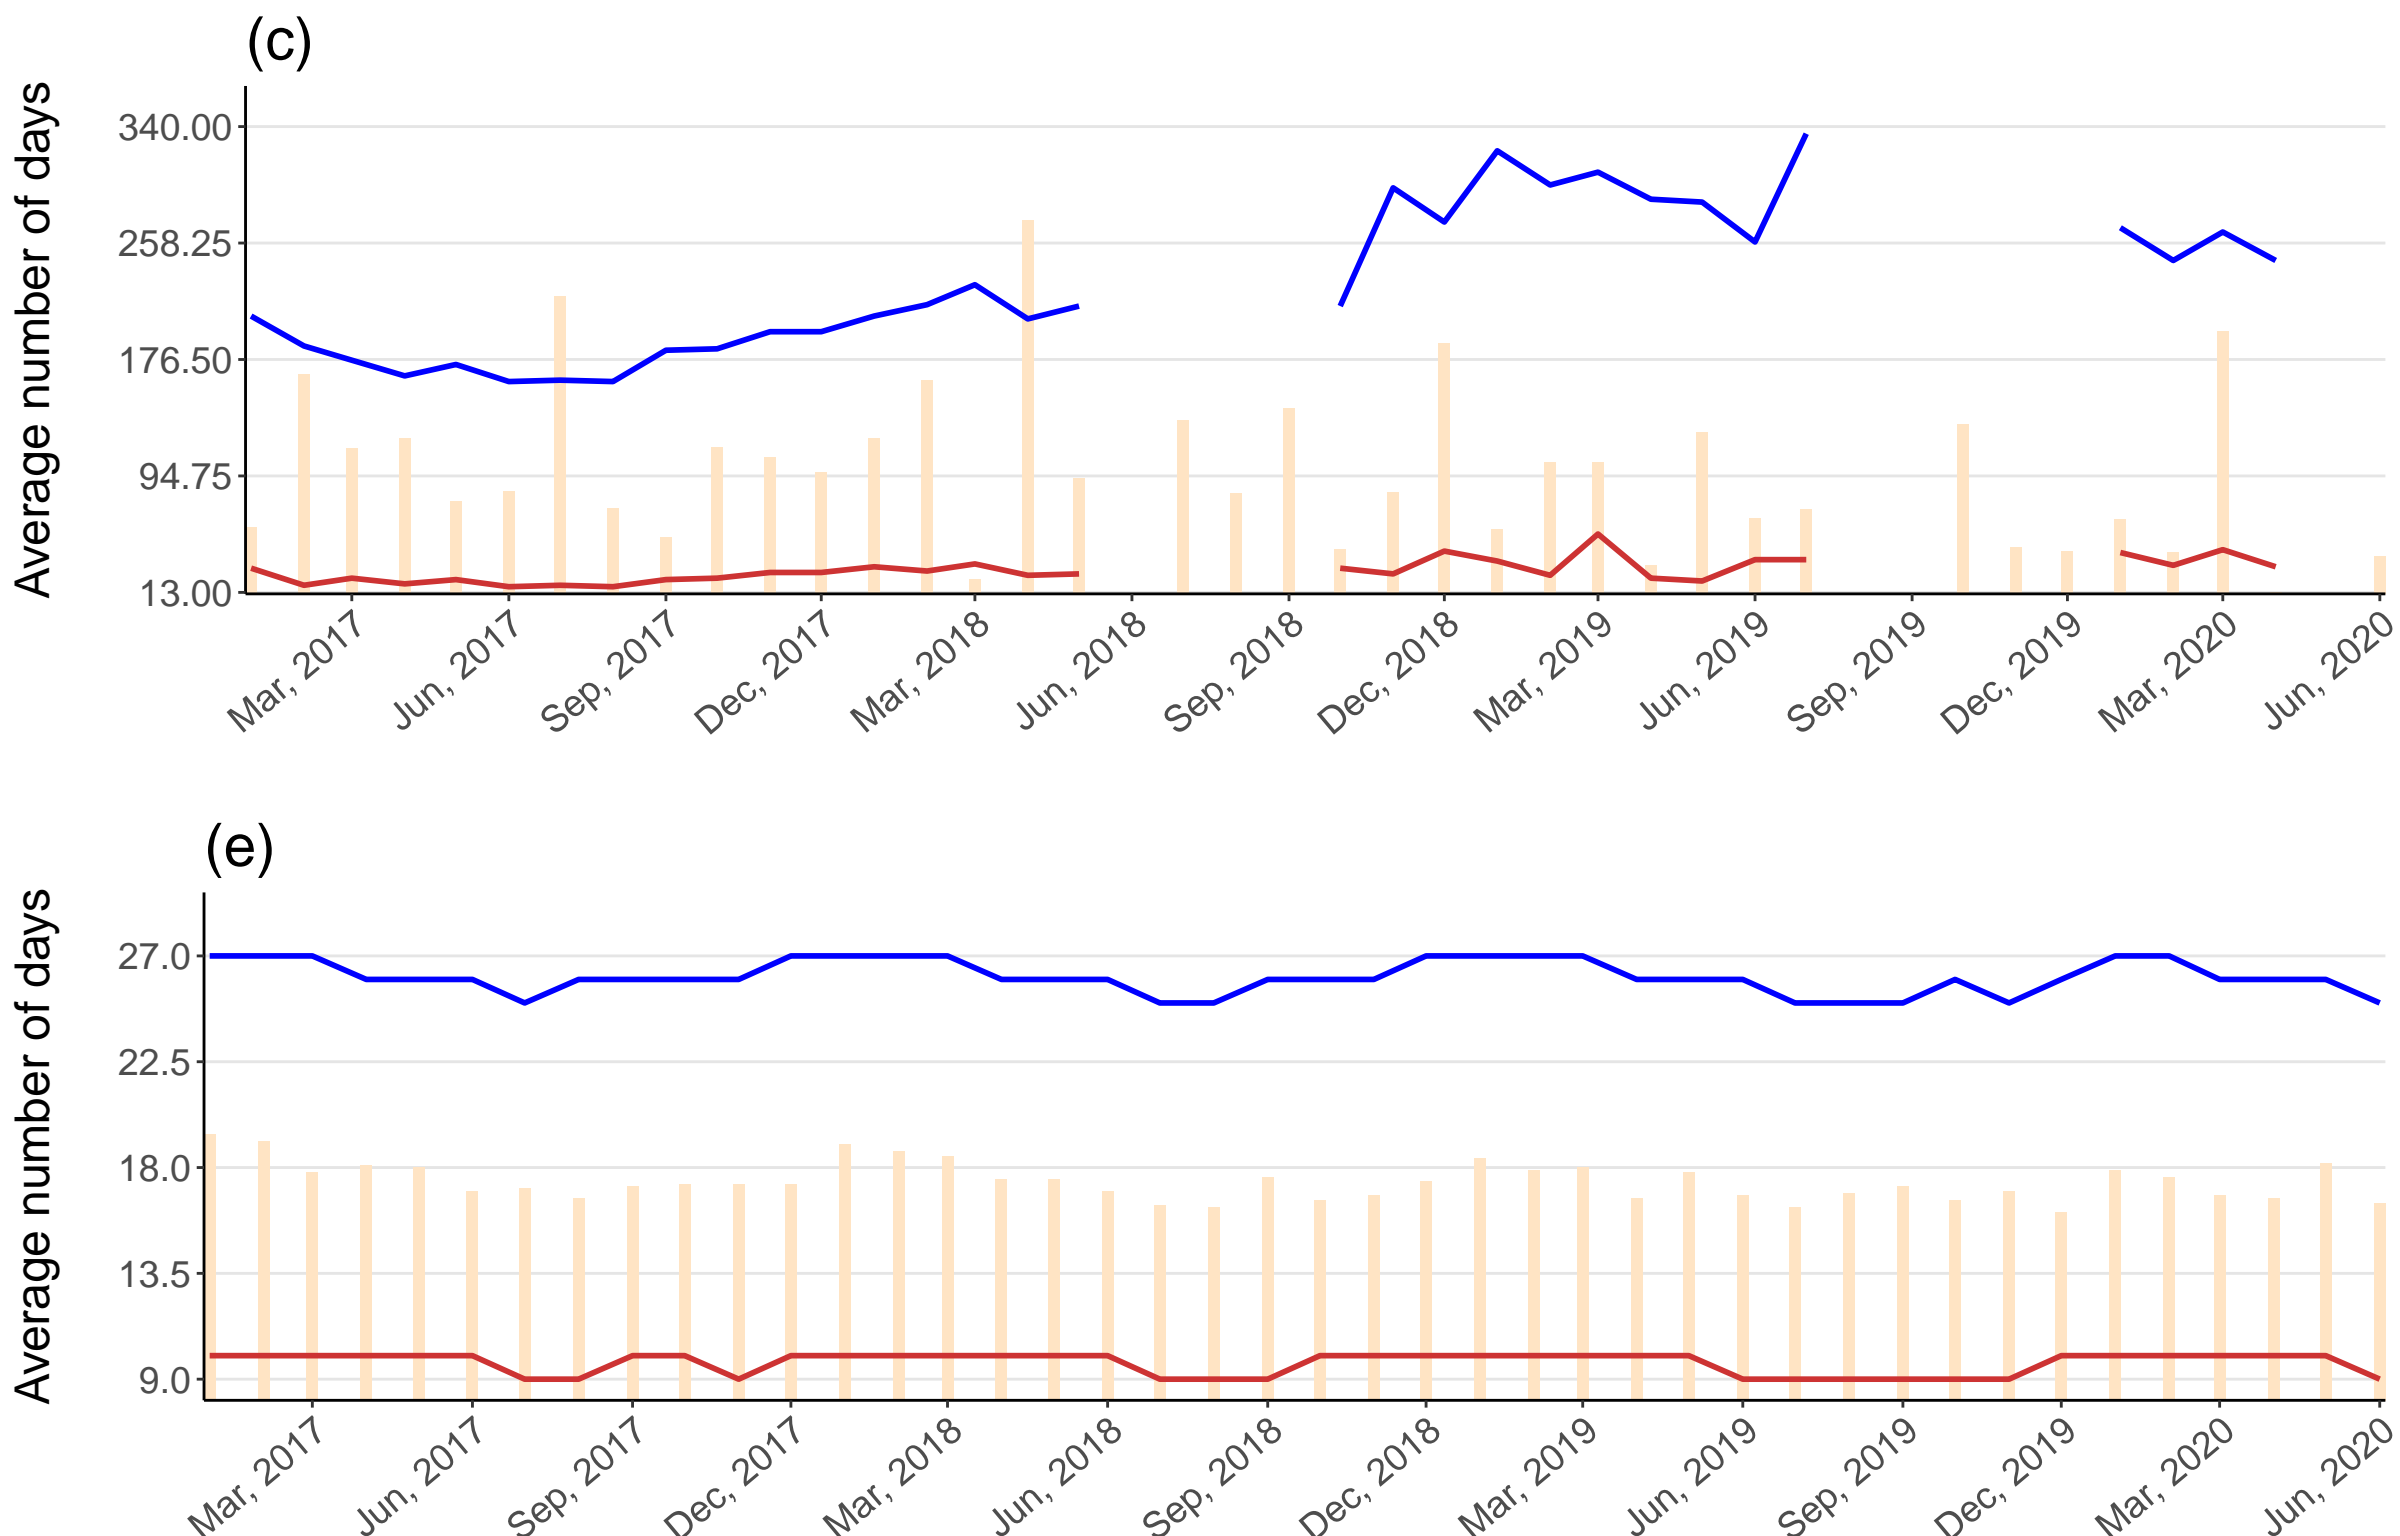

Shimane

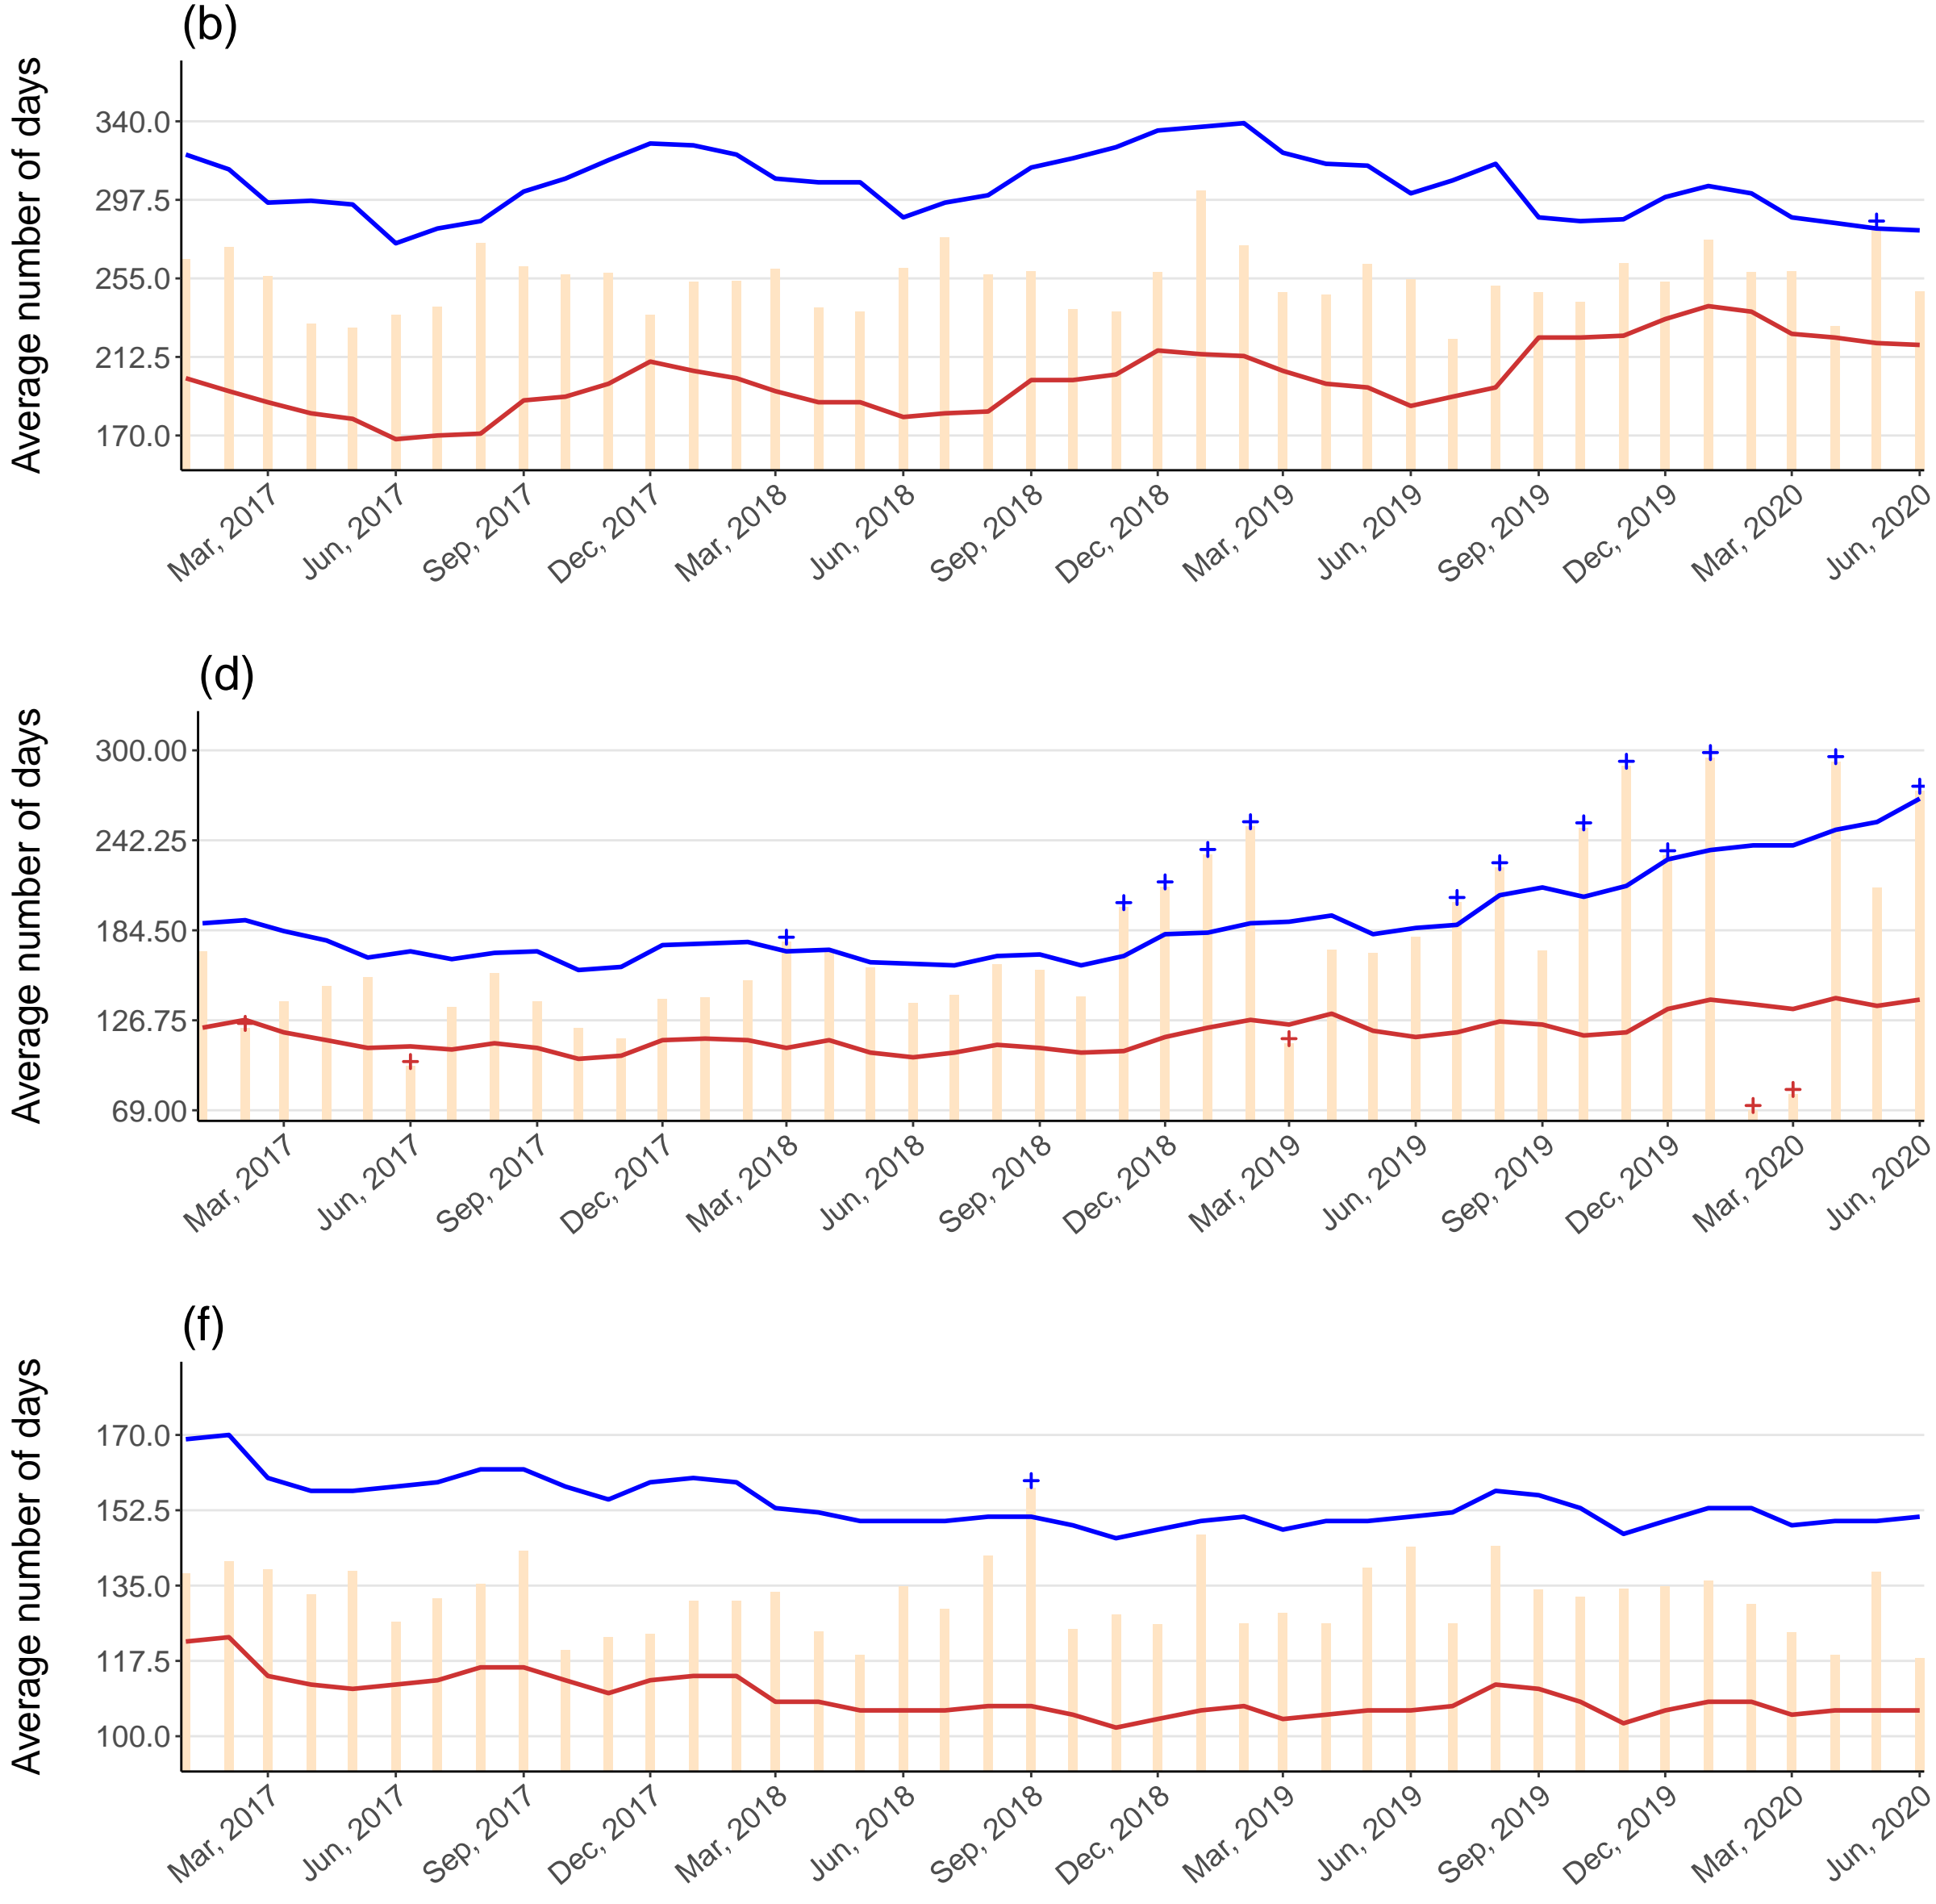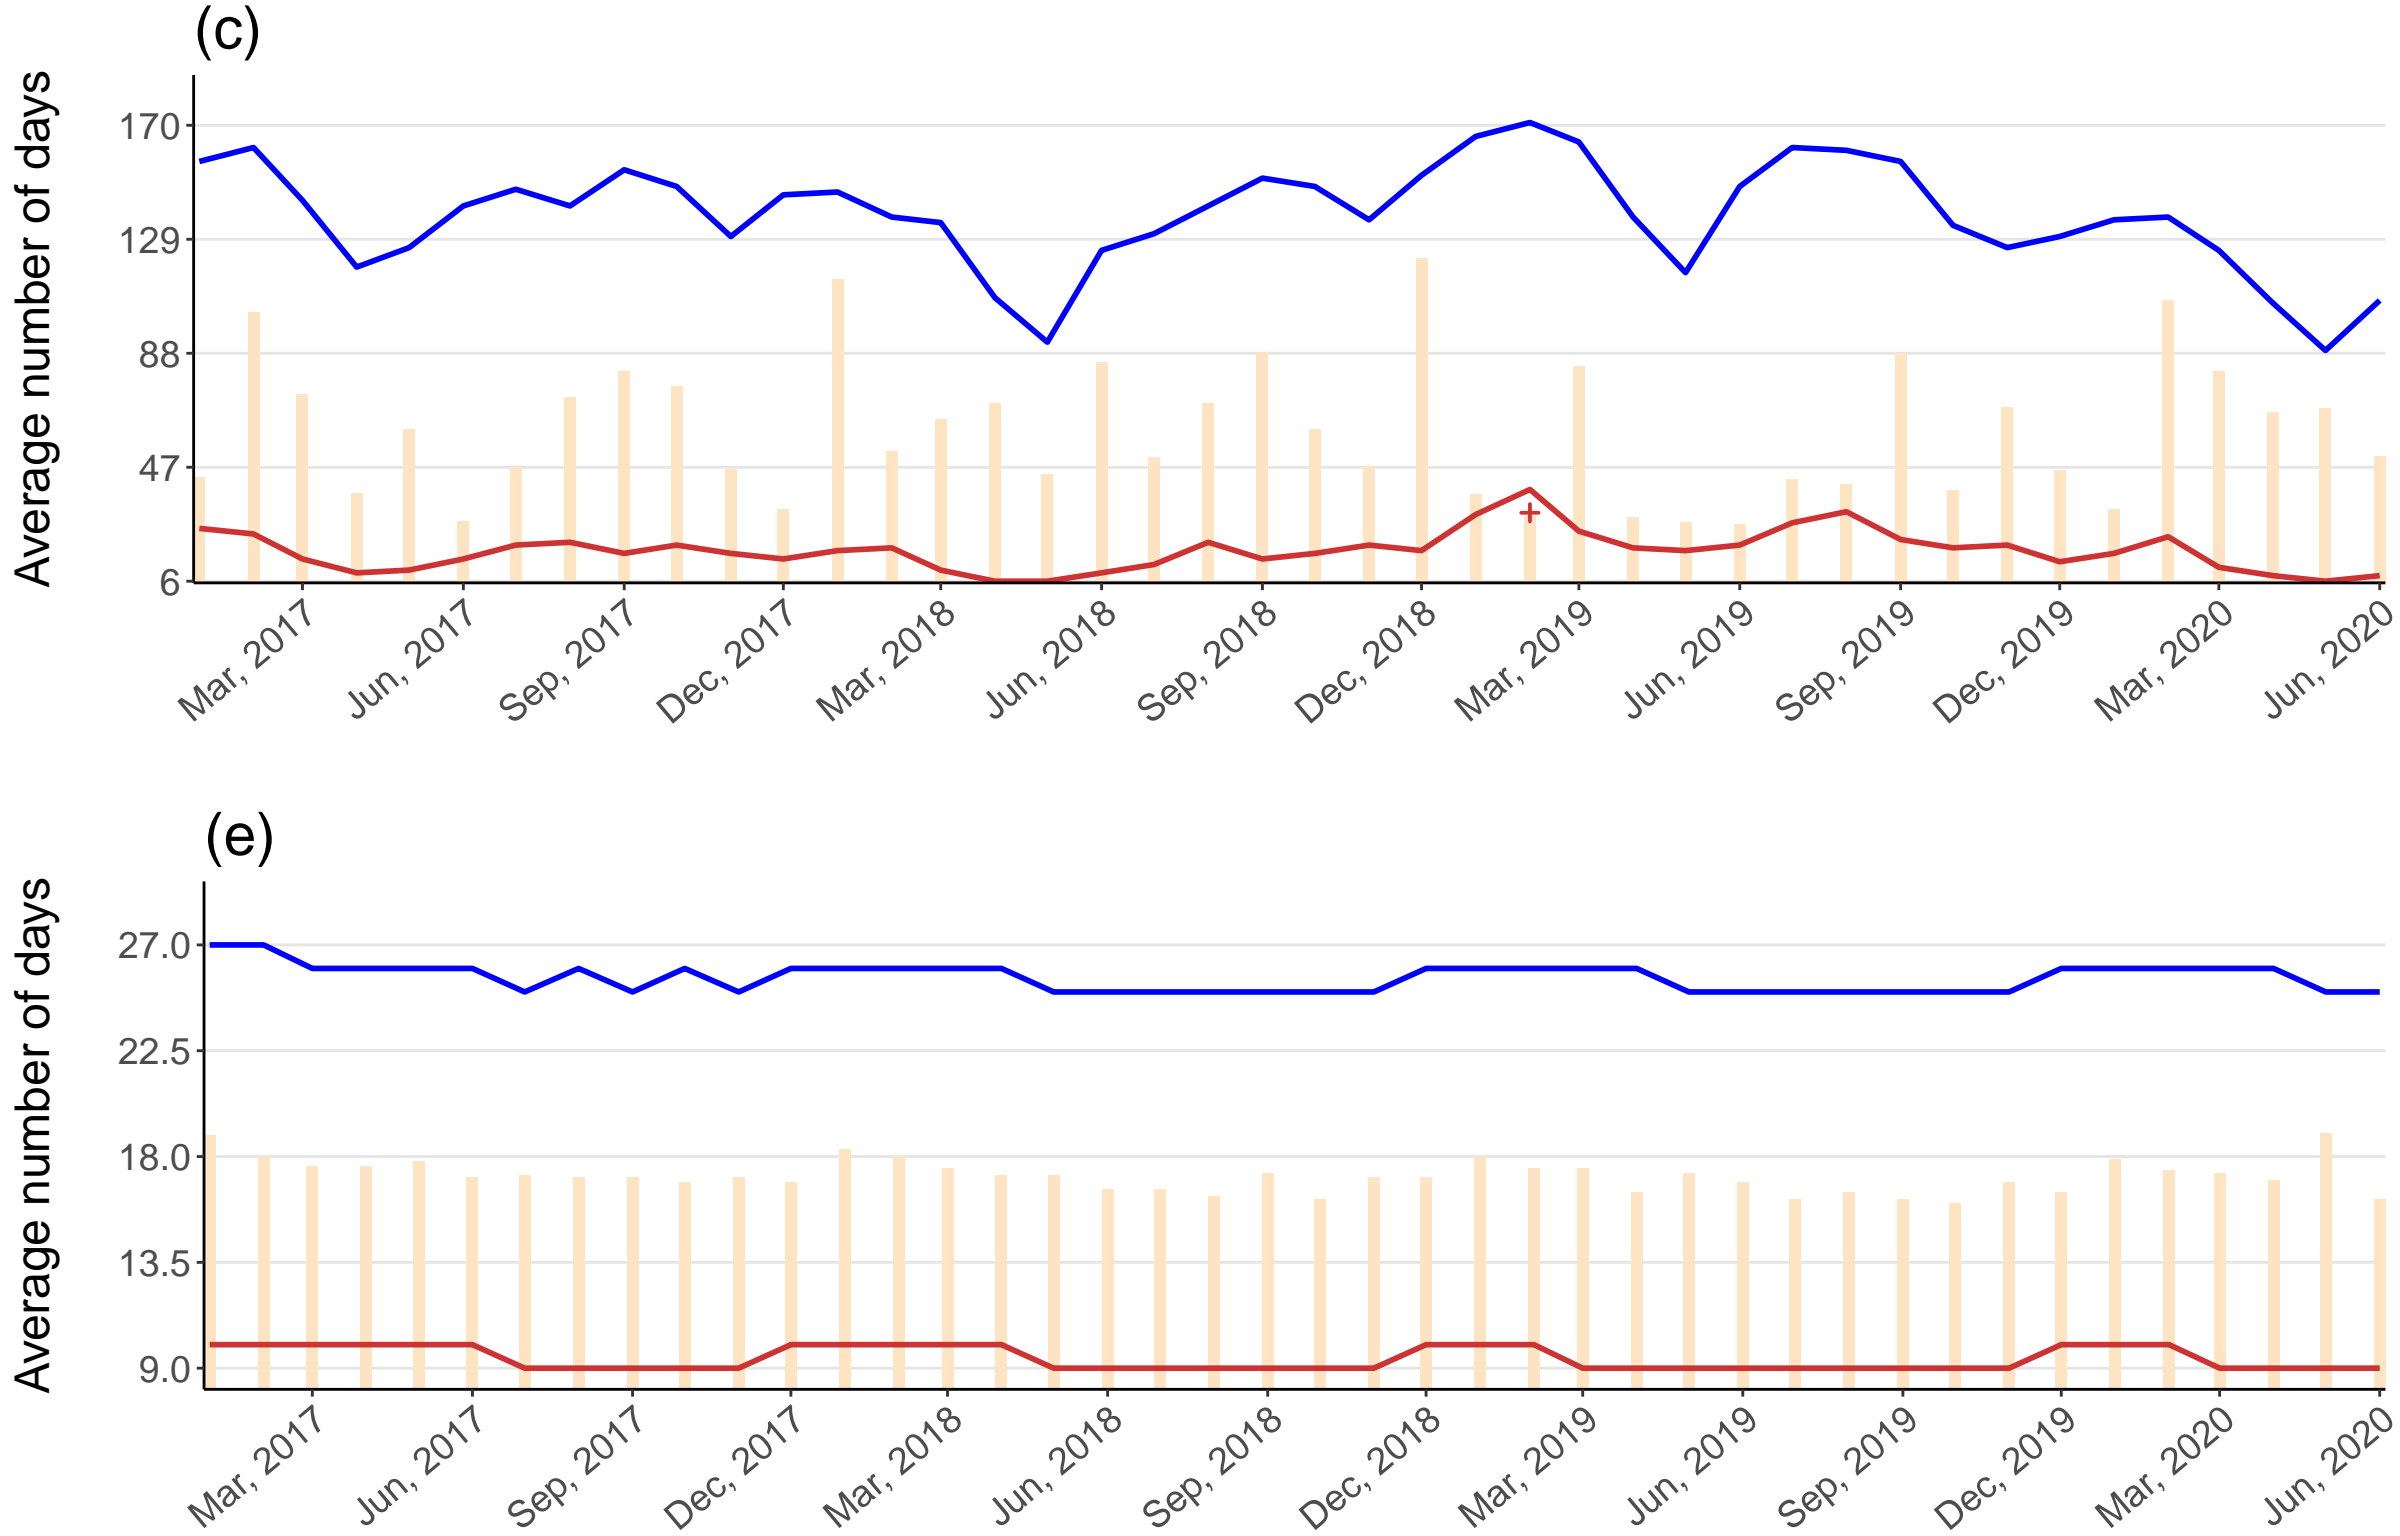

Okayama

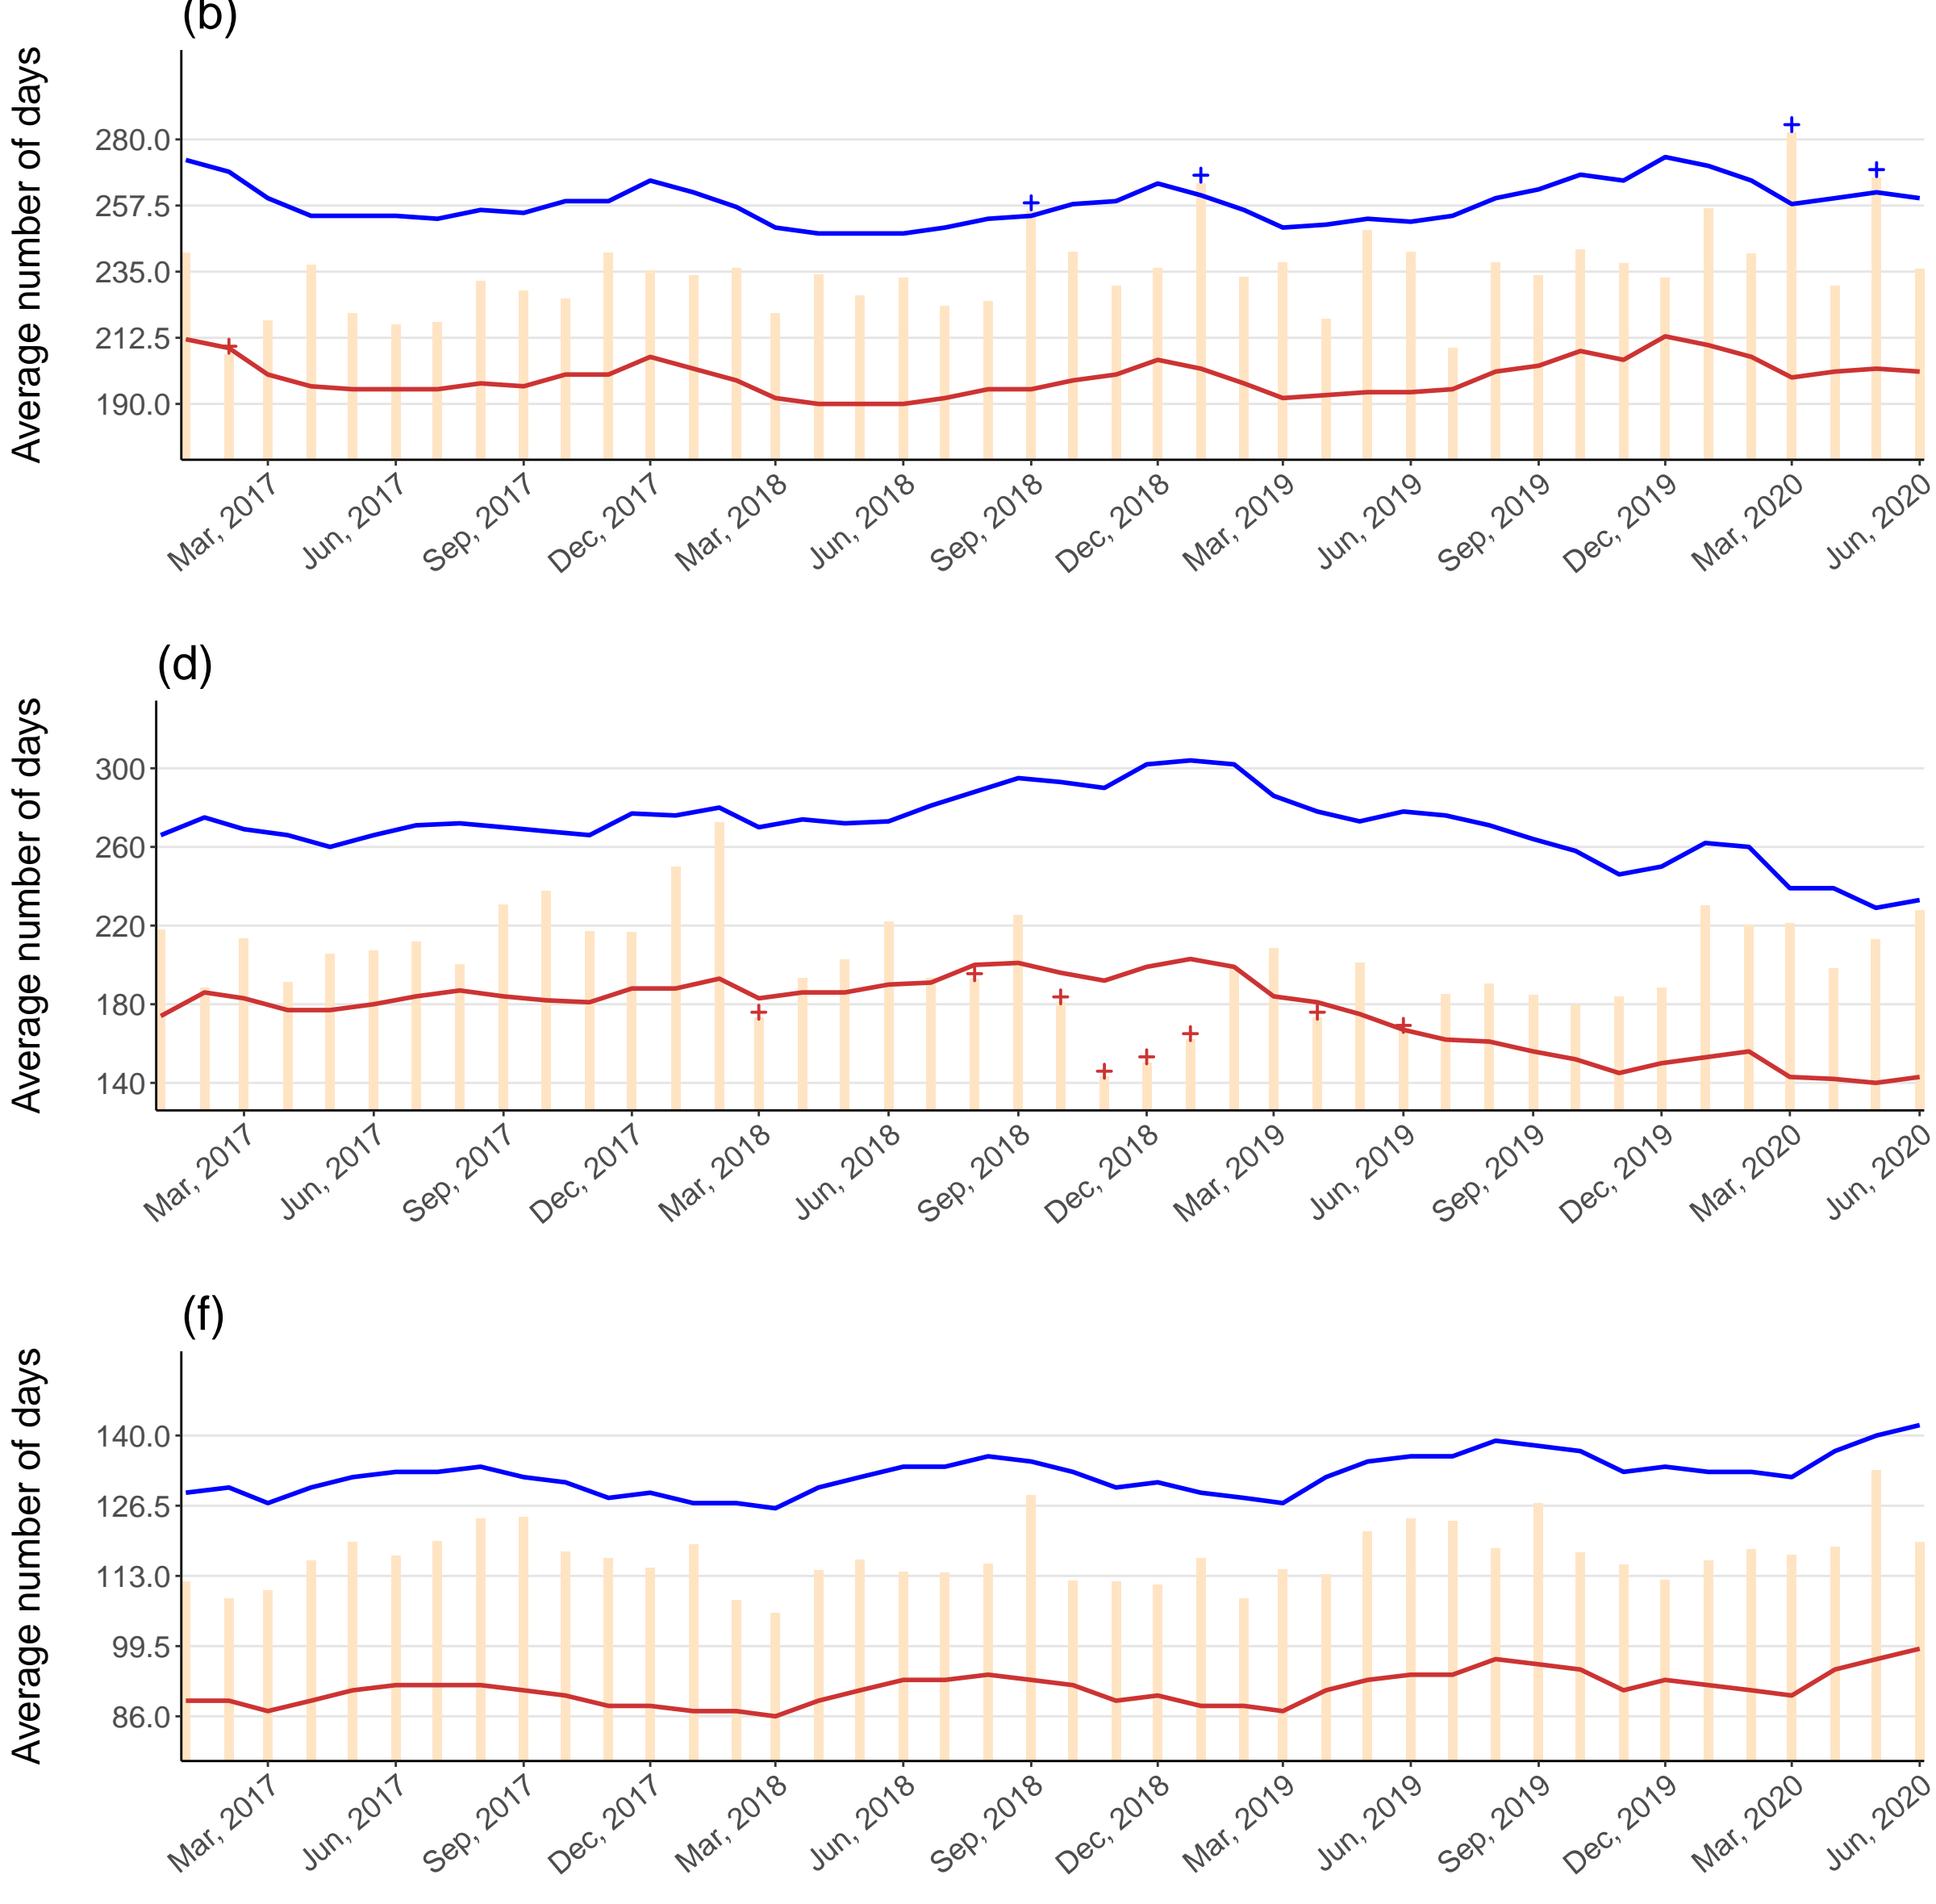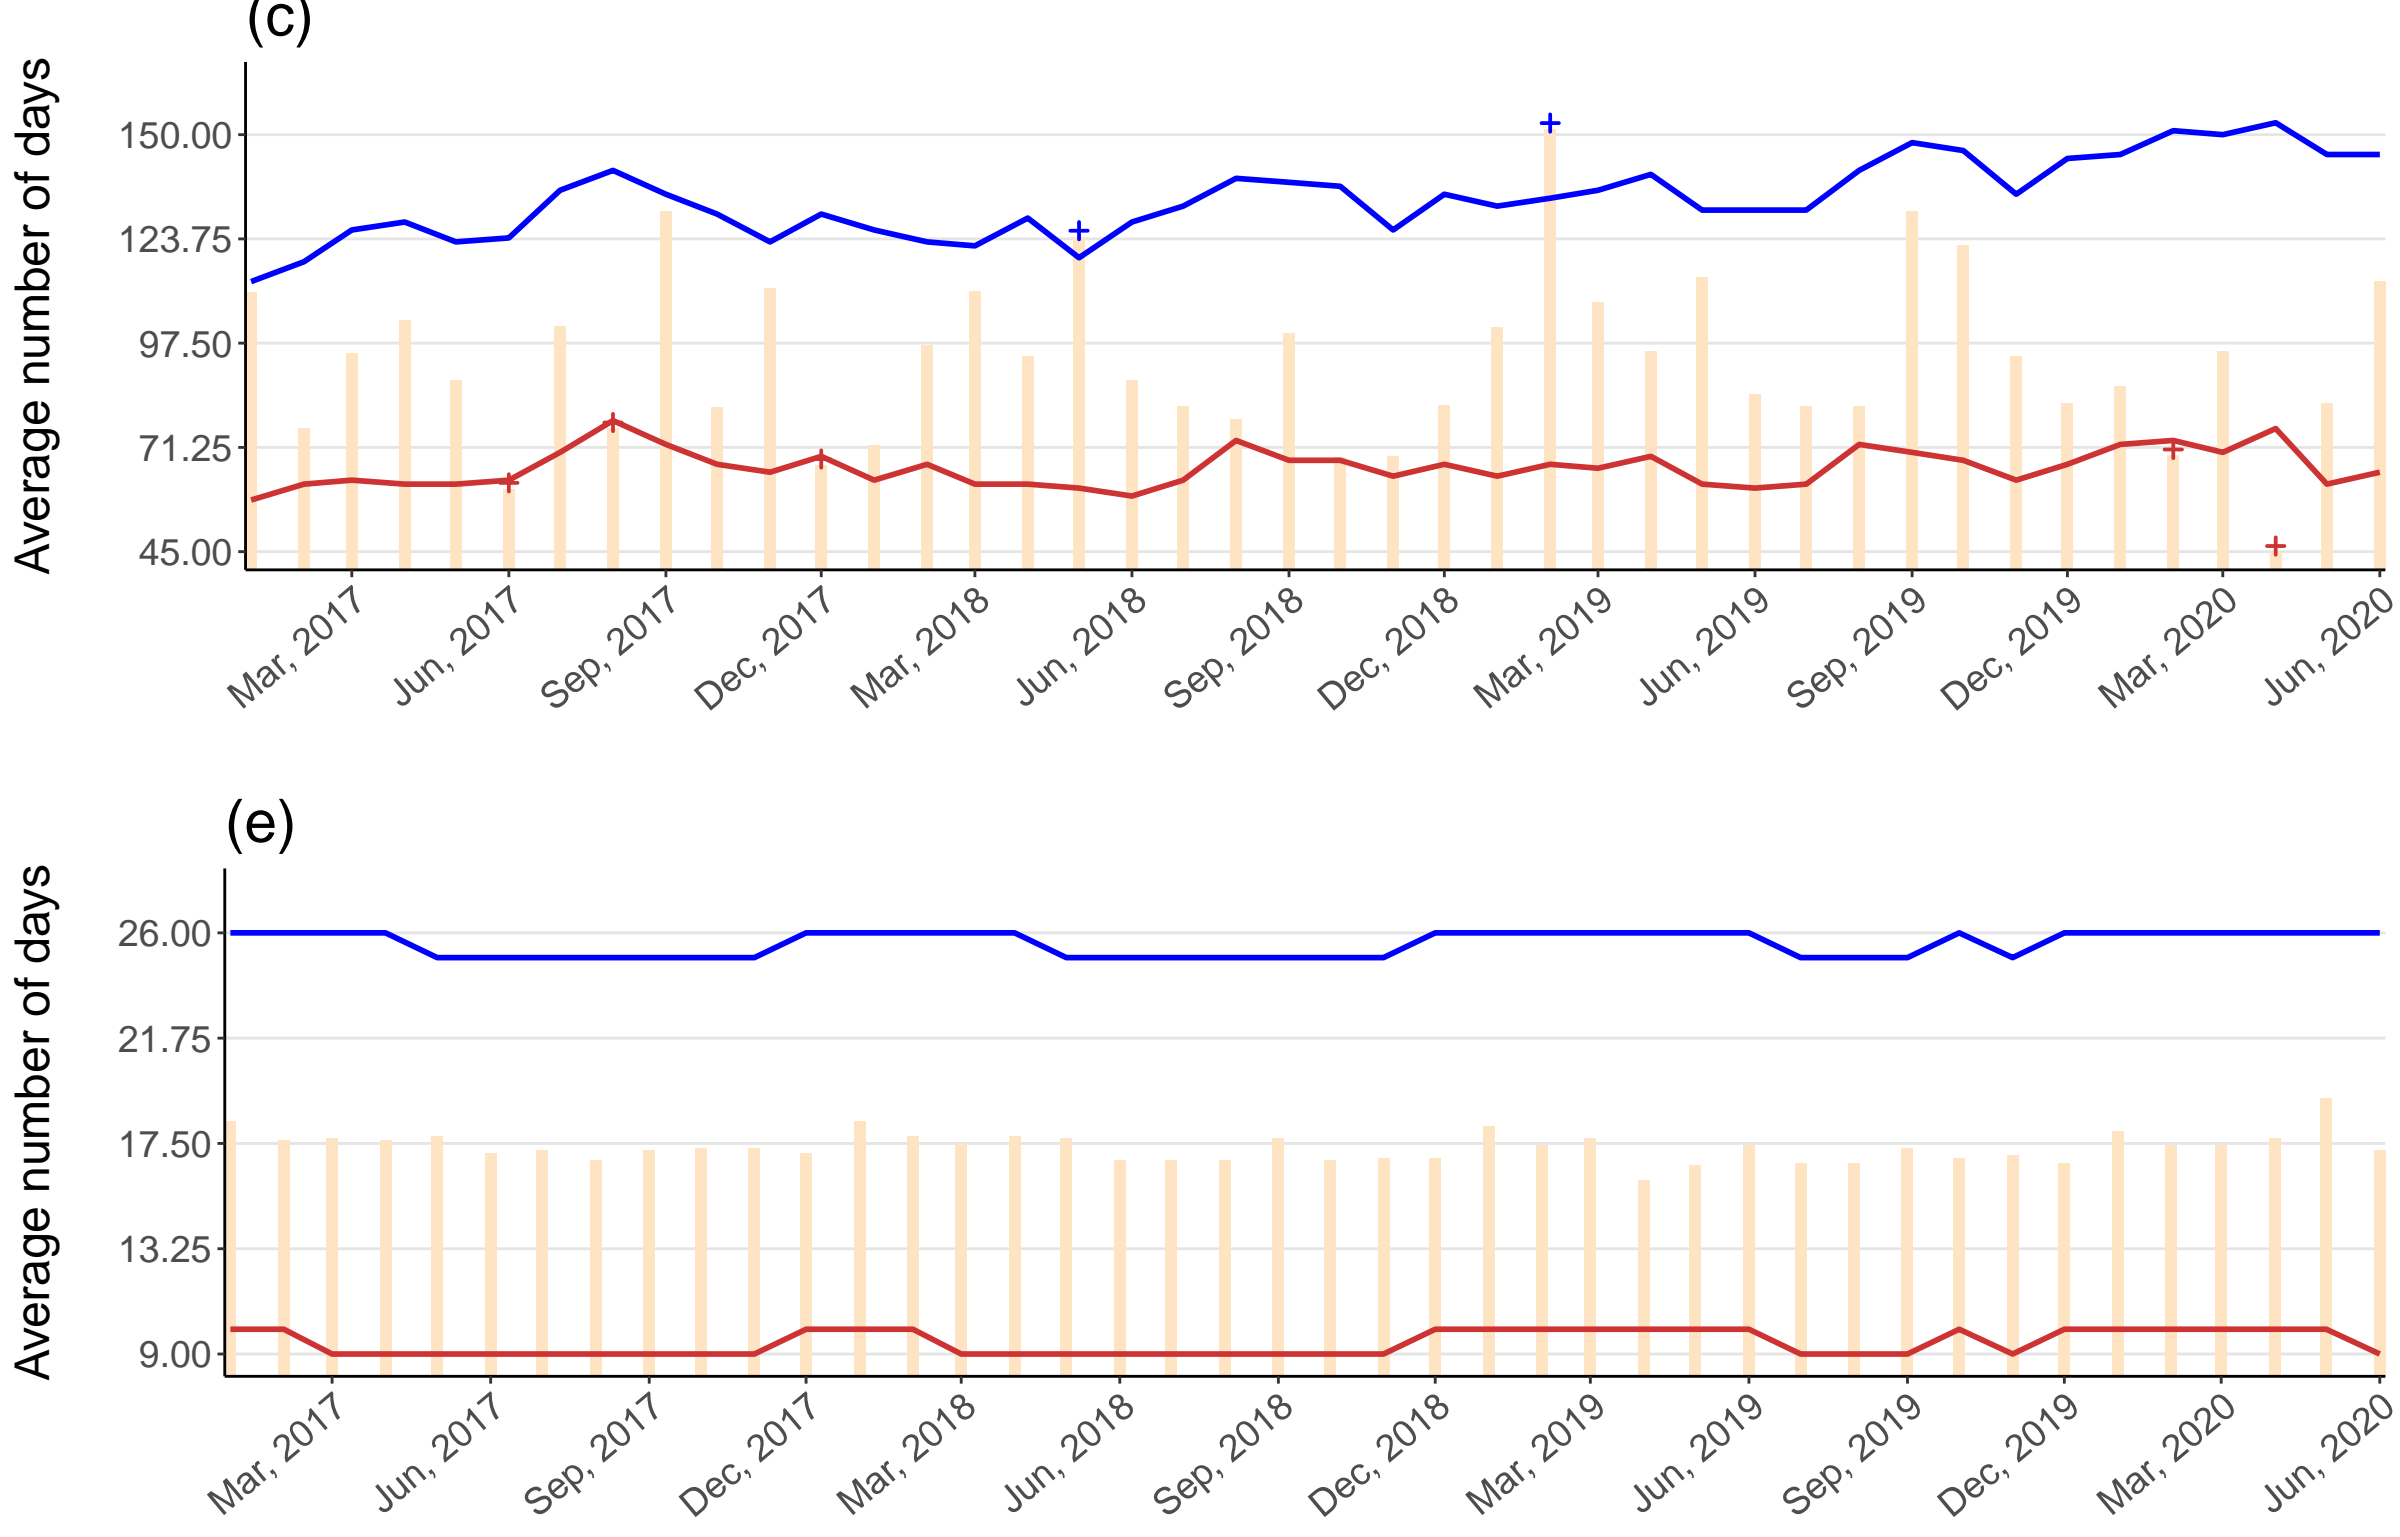

# Hiroshima

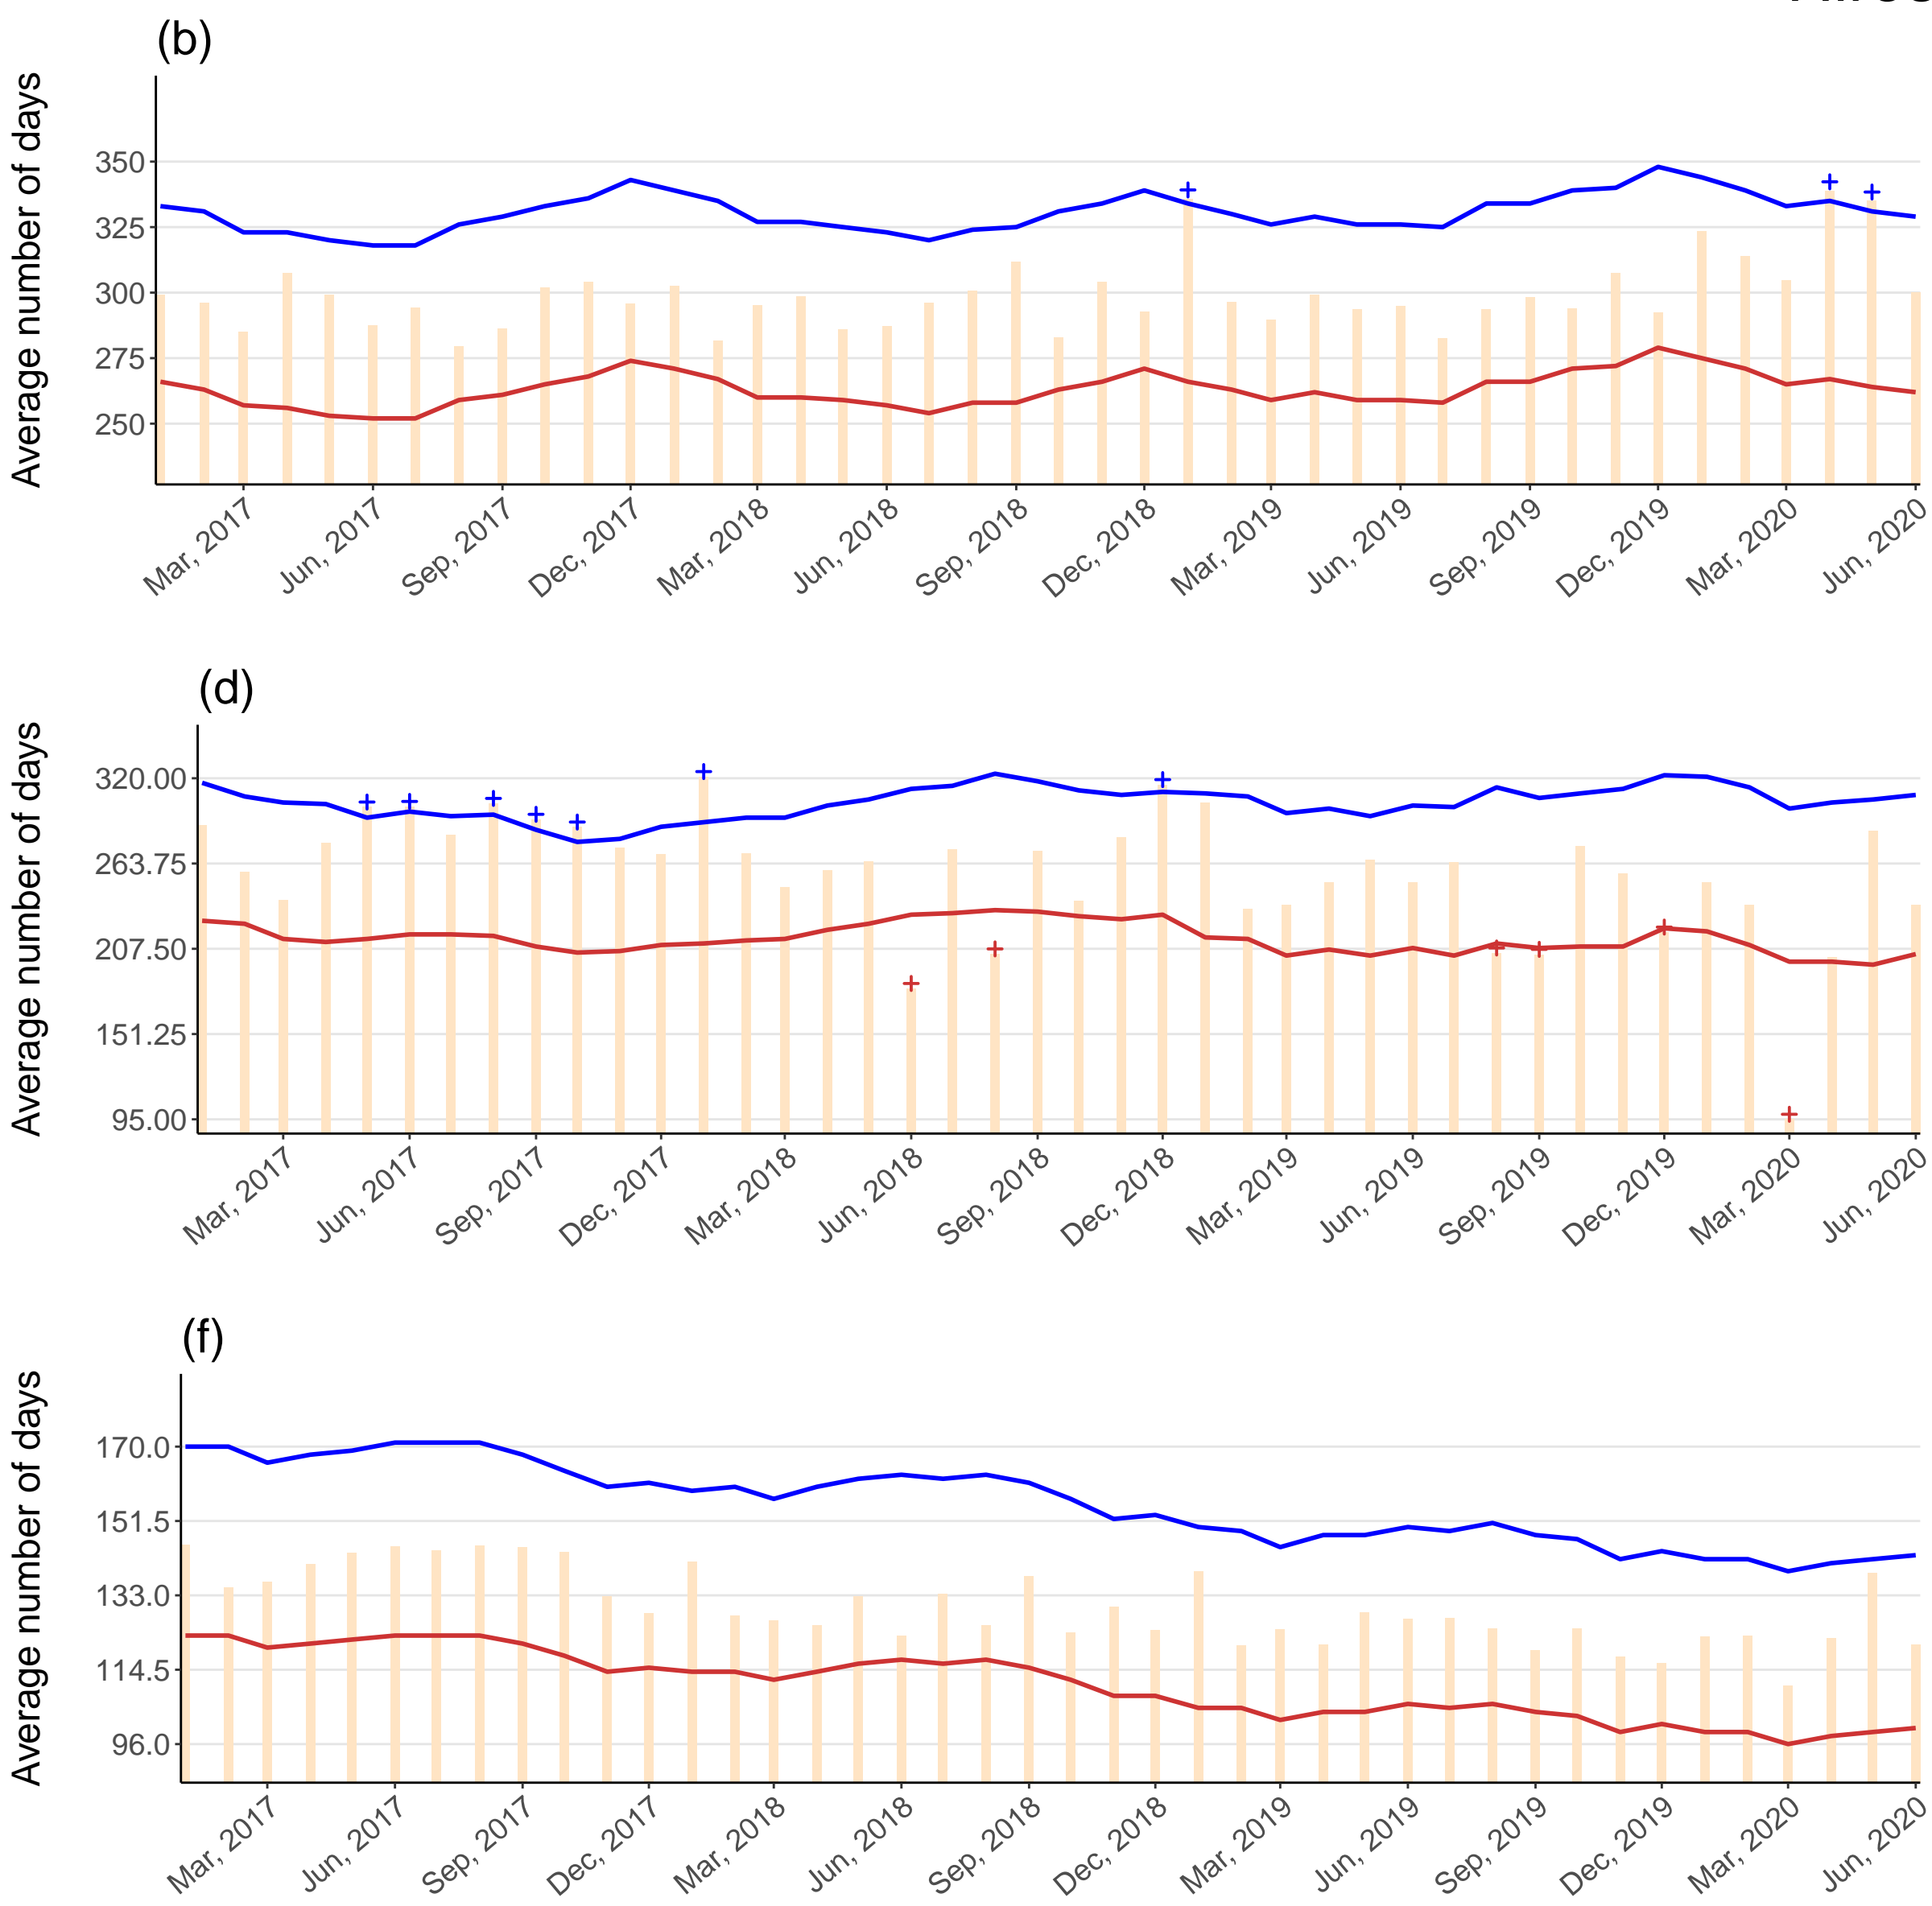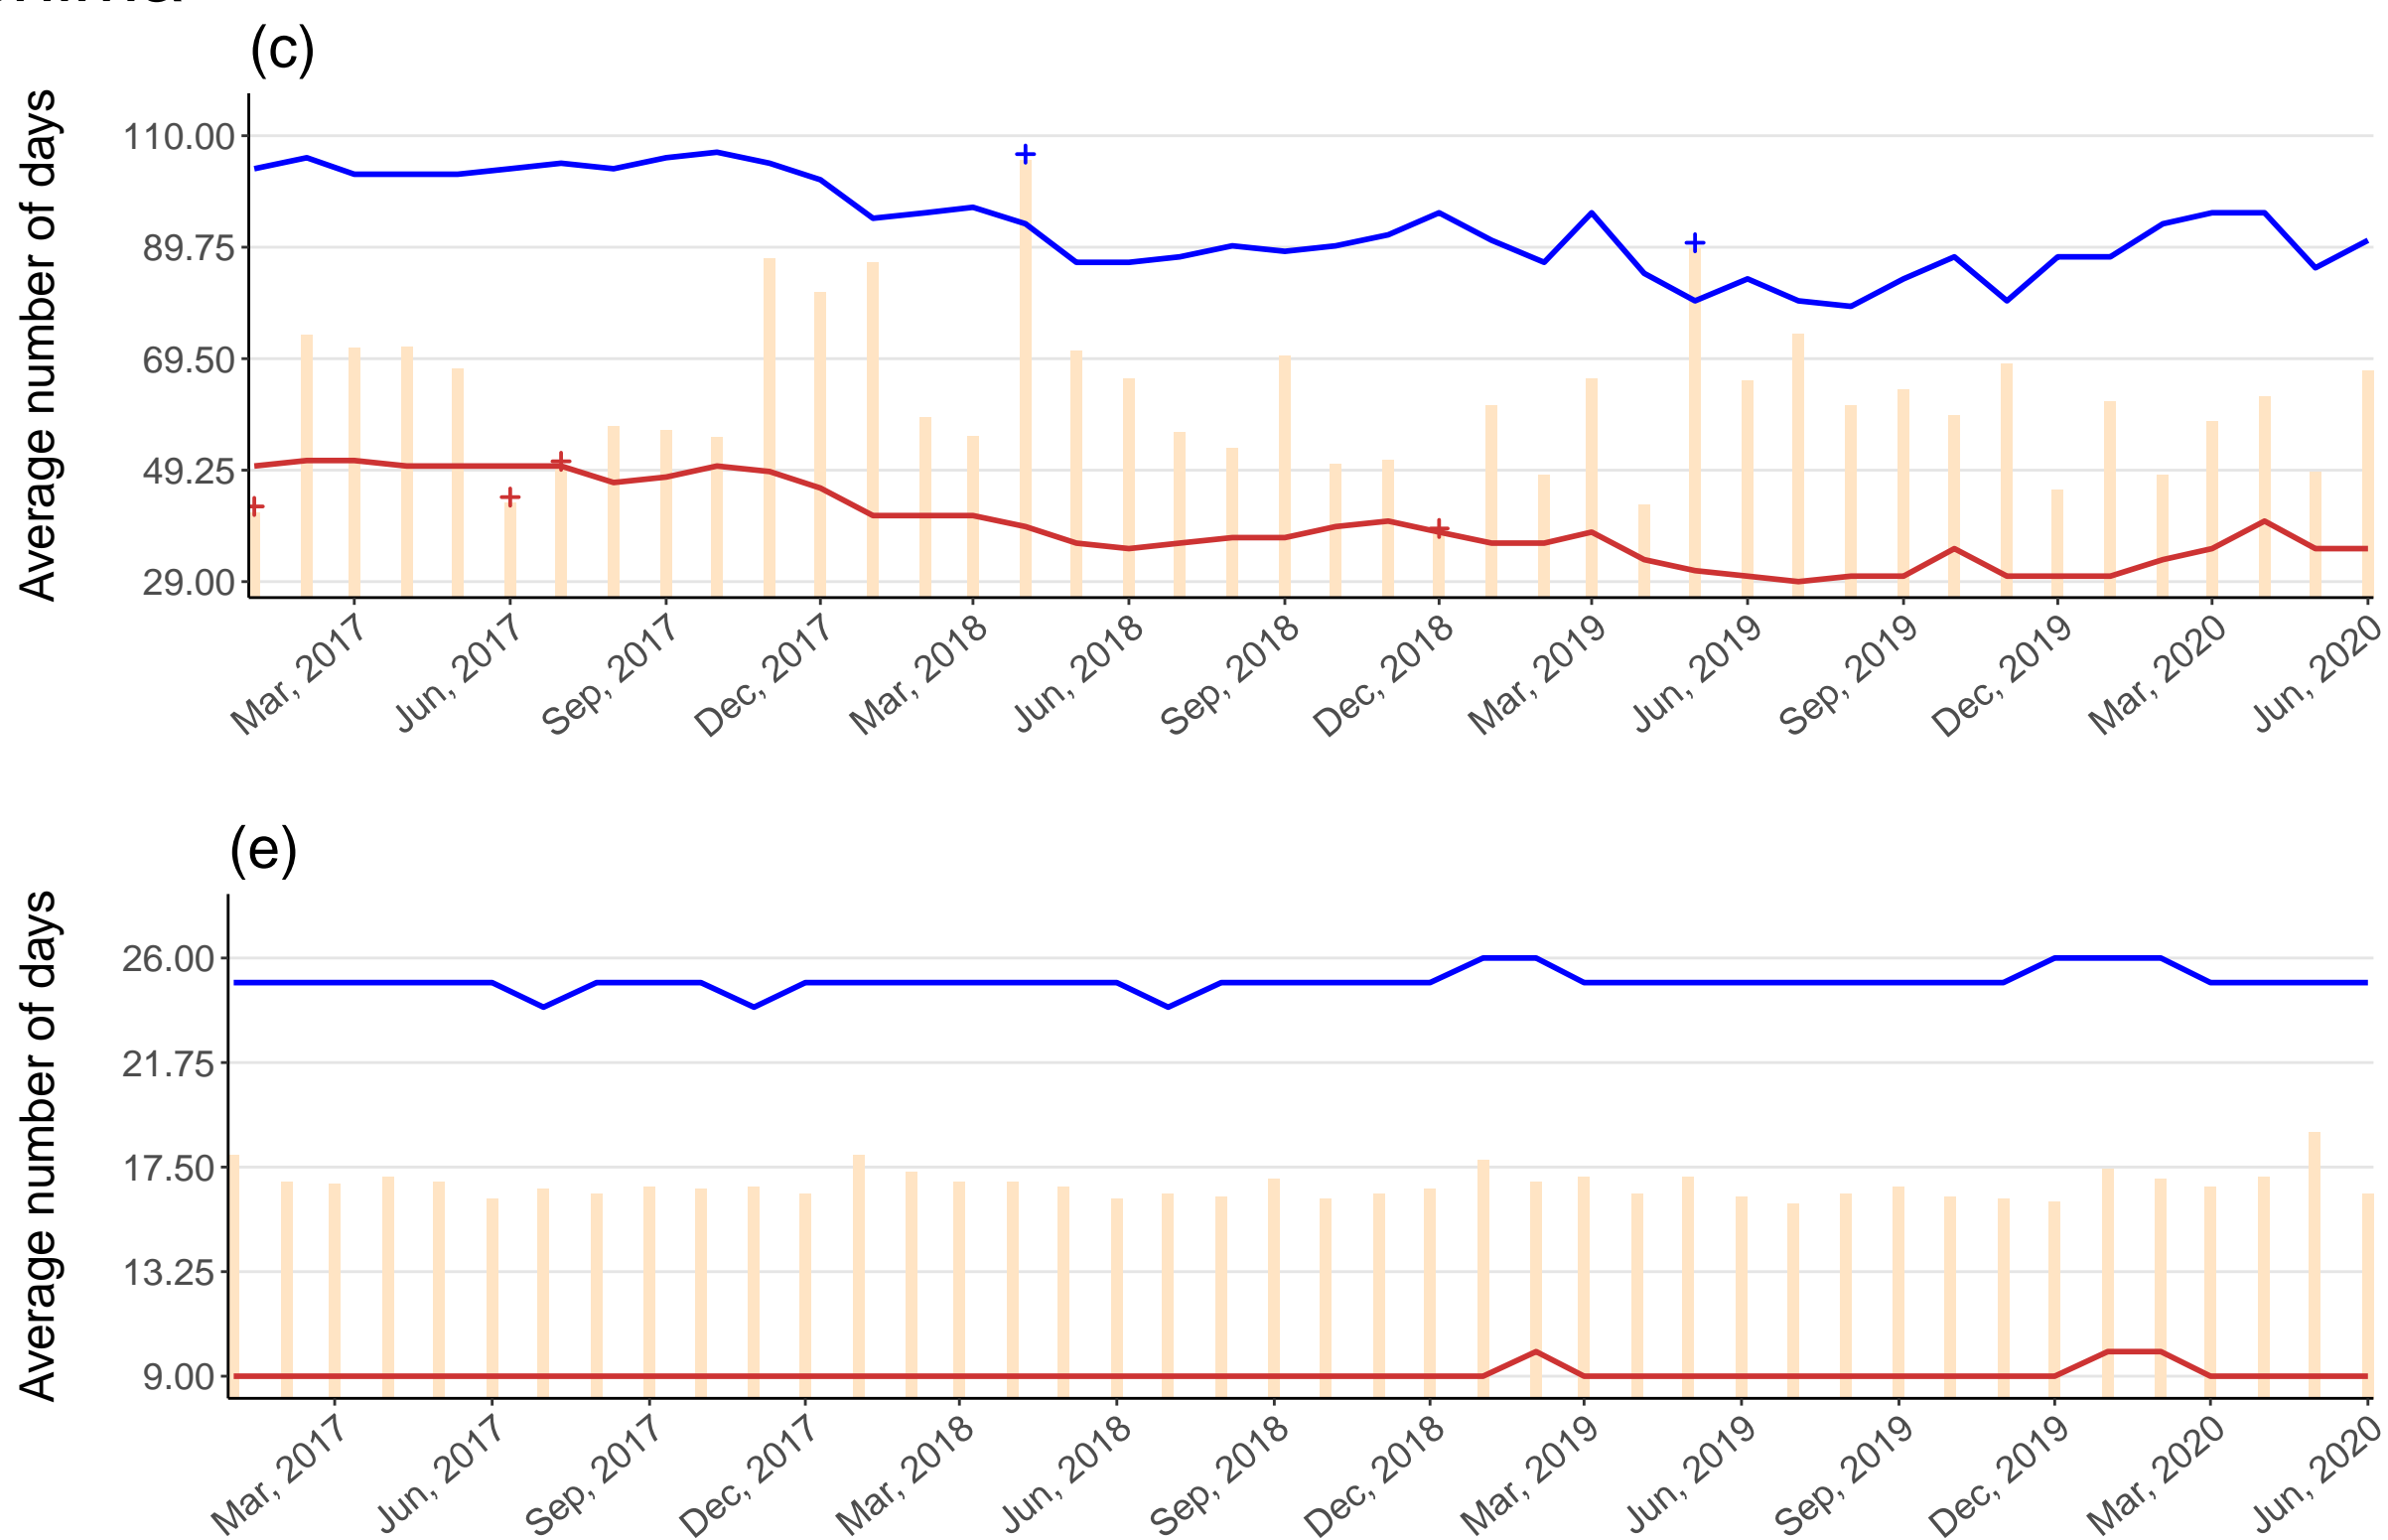

# Yamaguchi

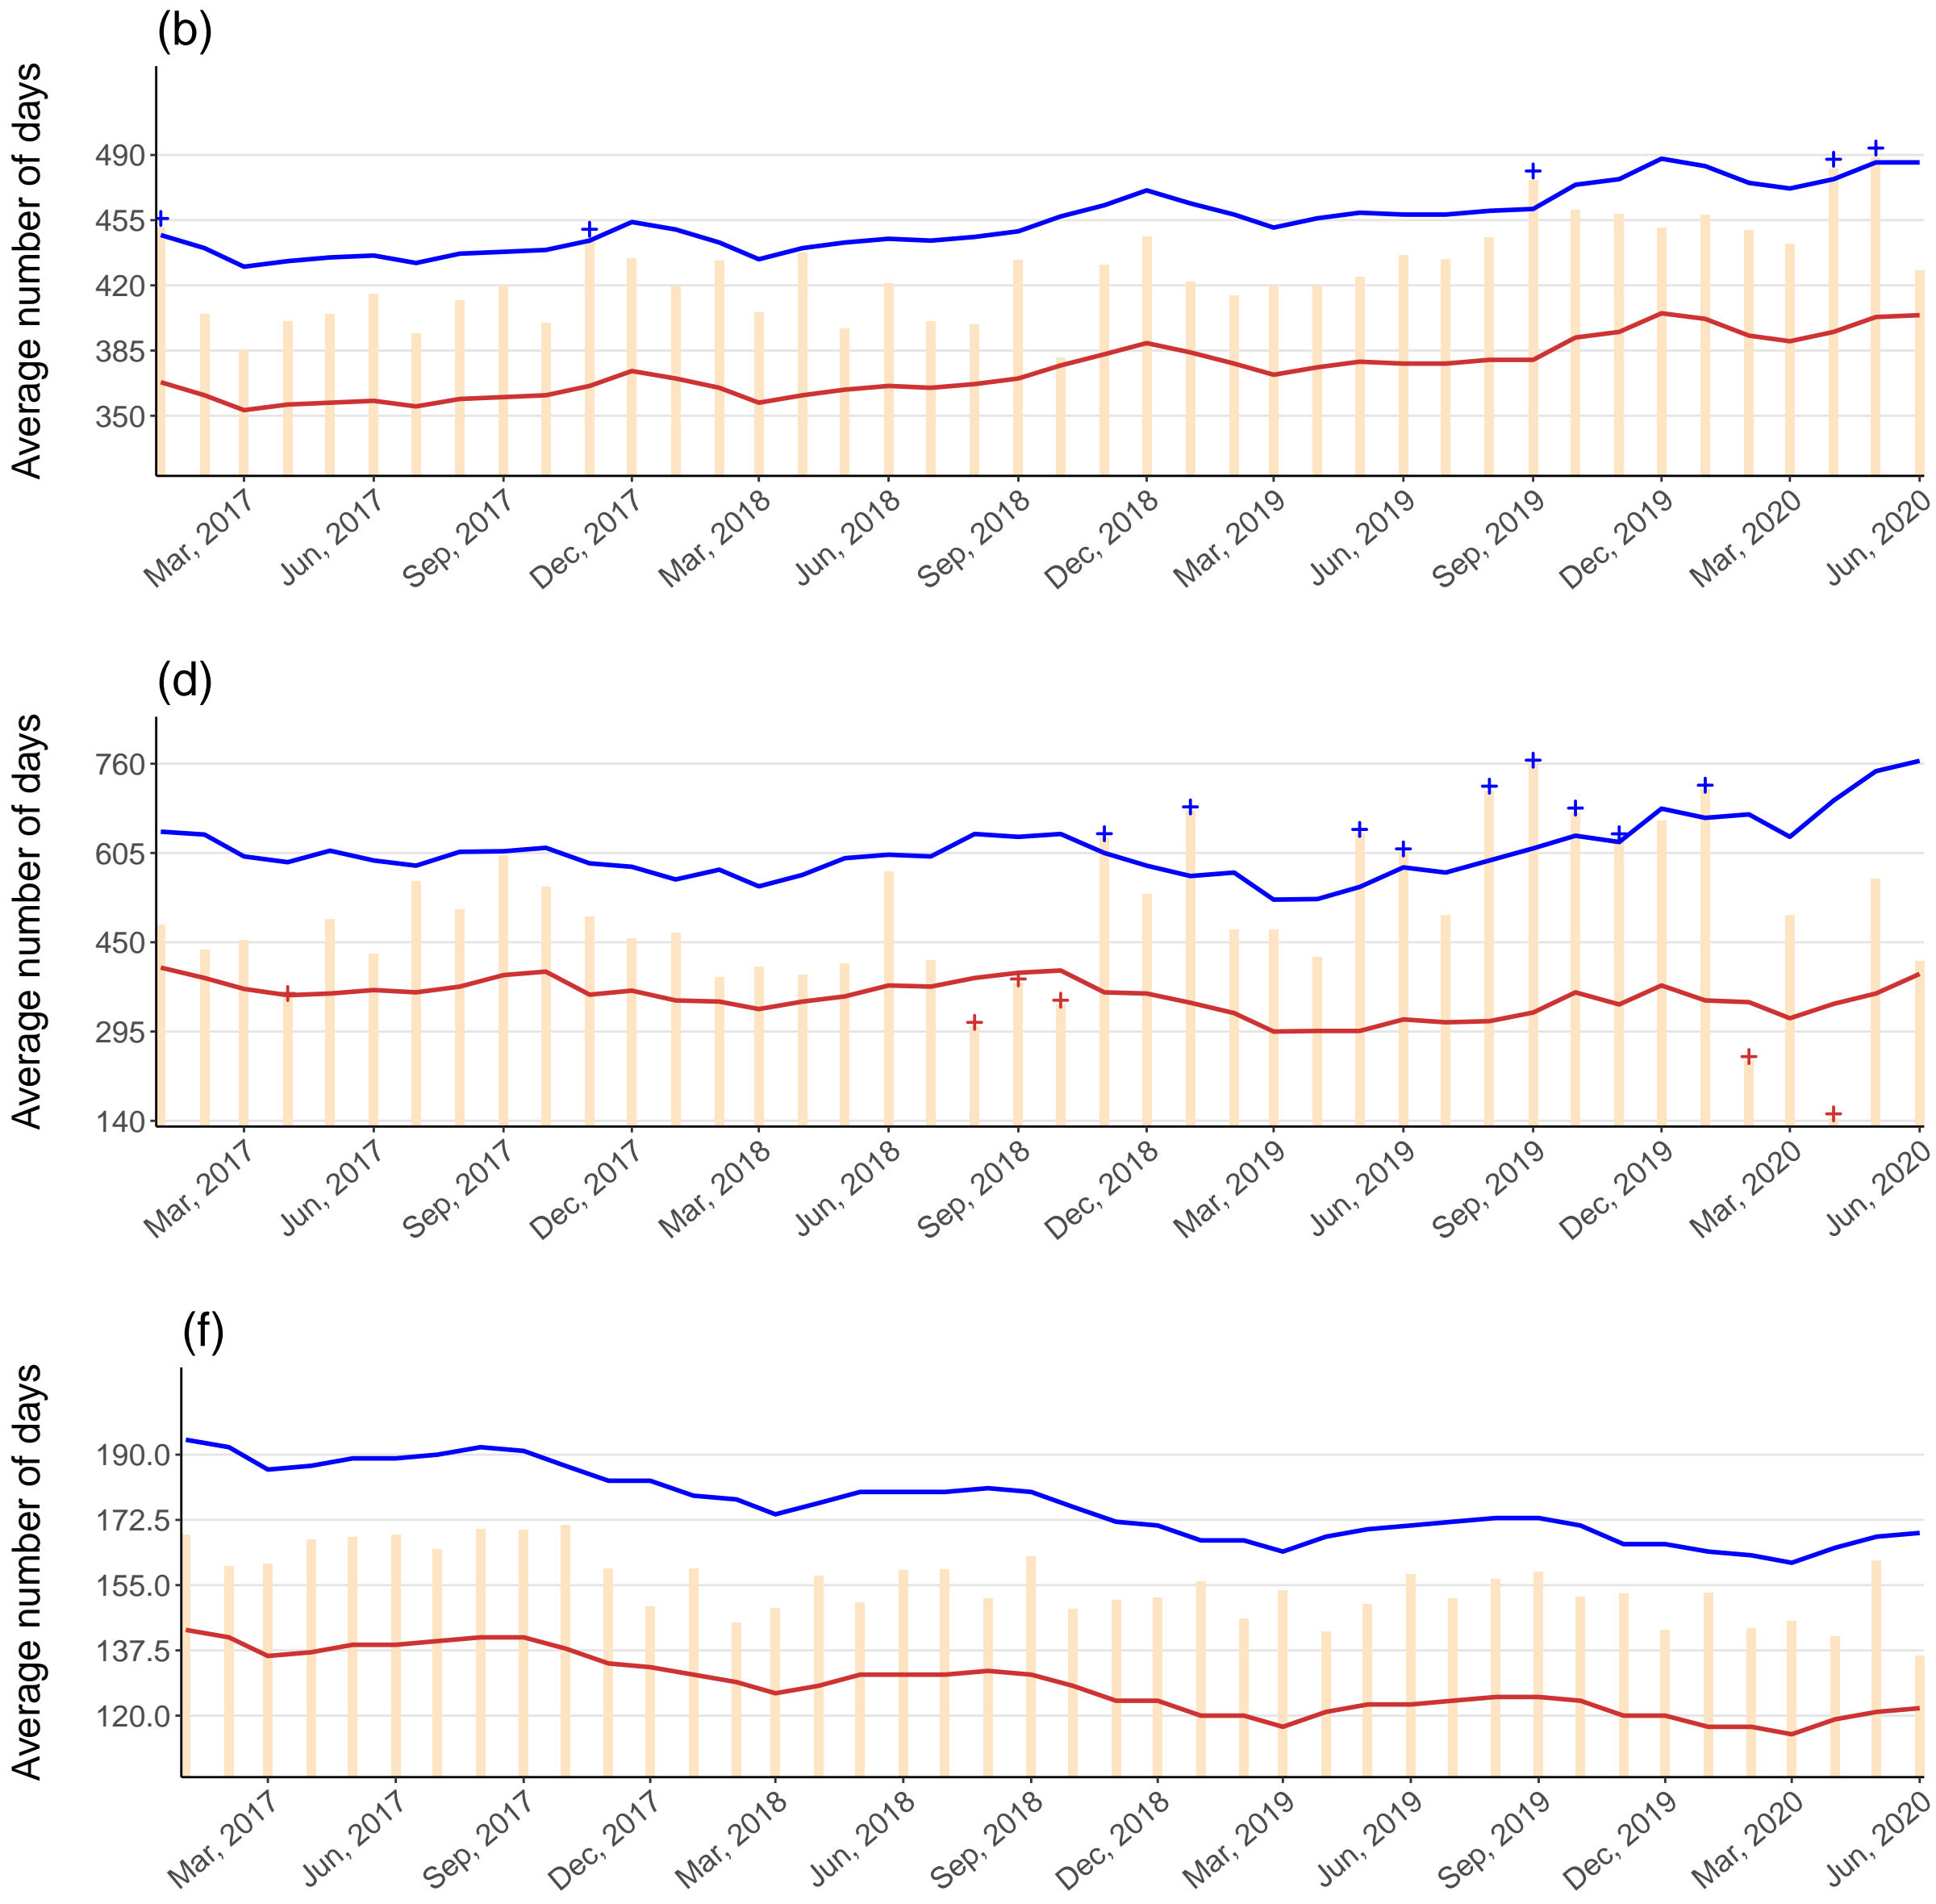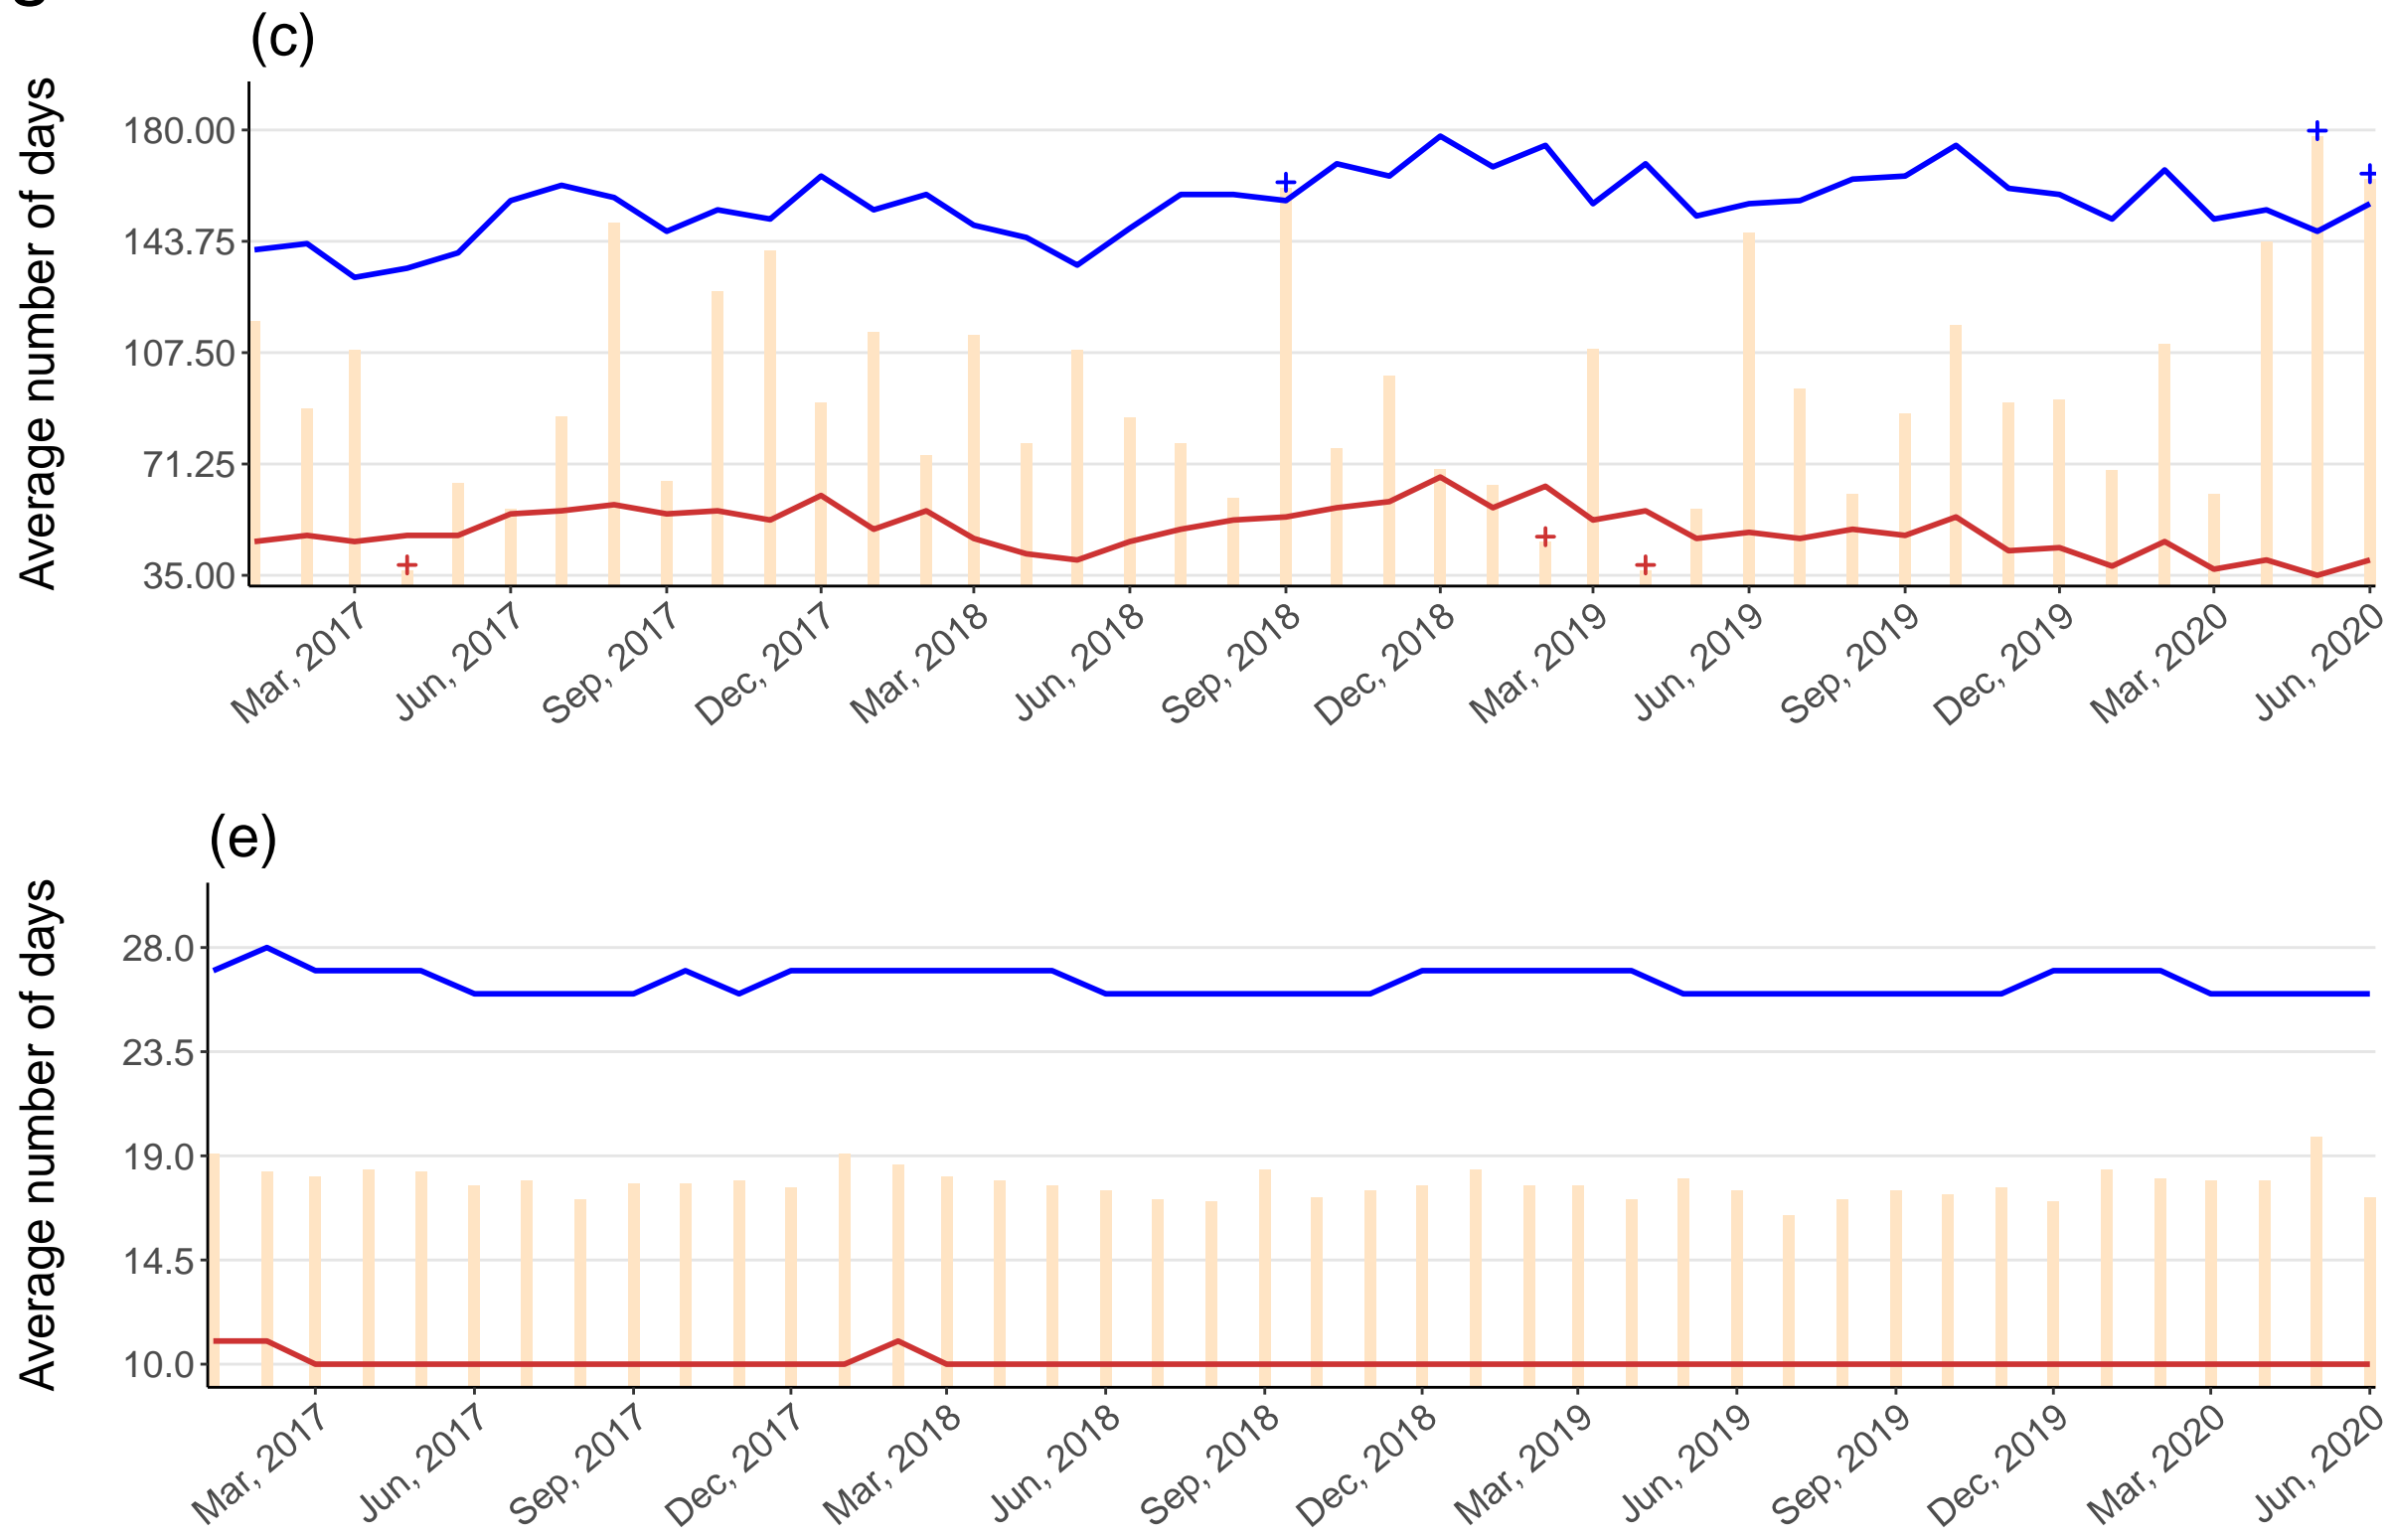

# Tokushima

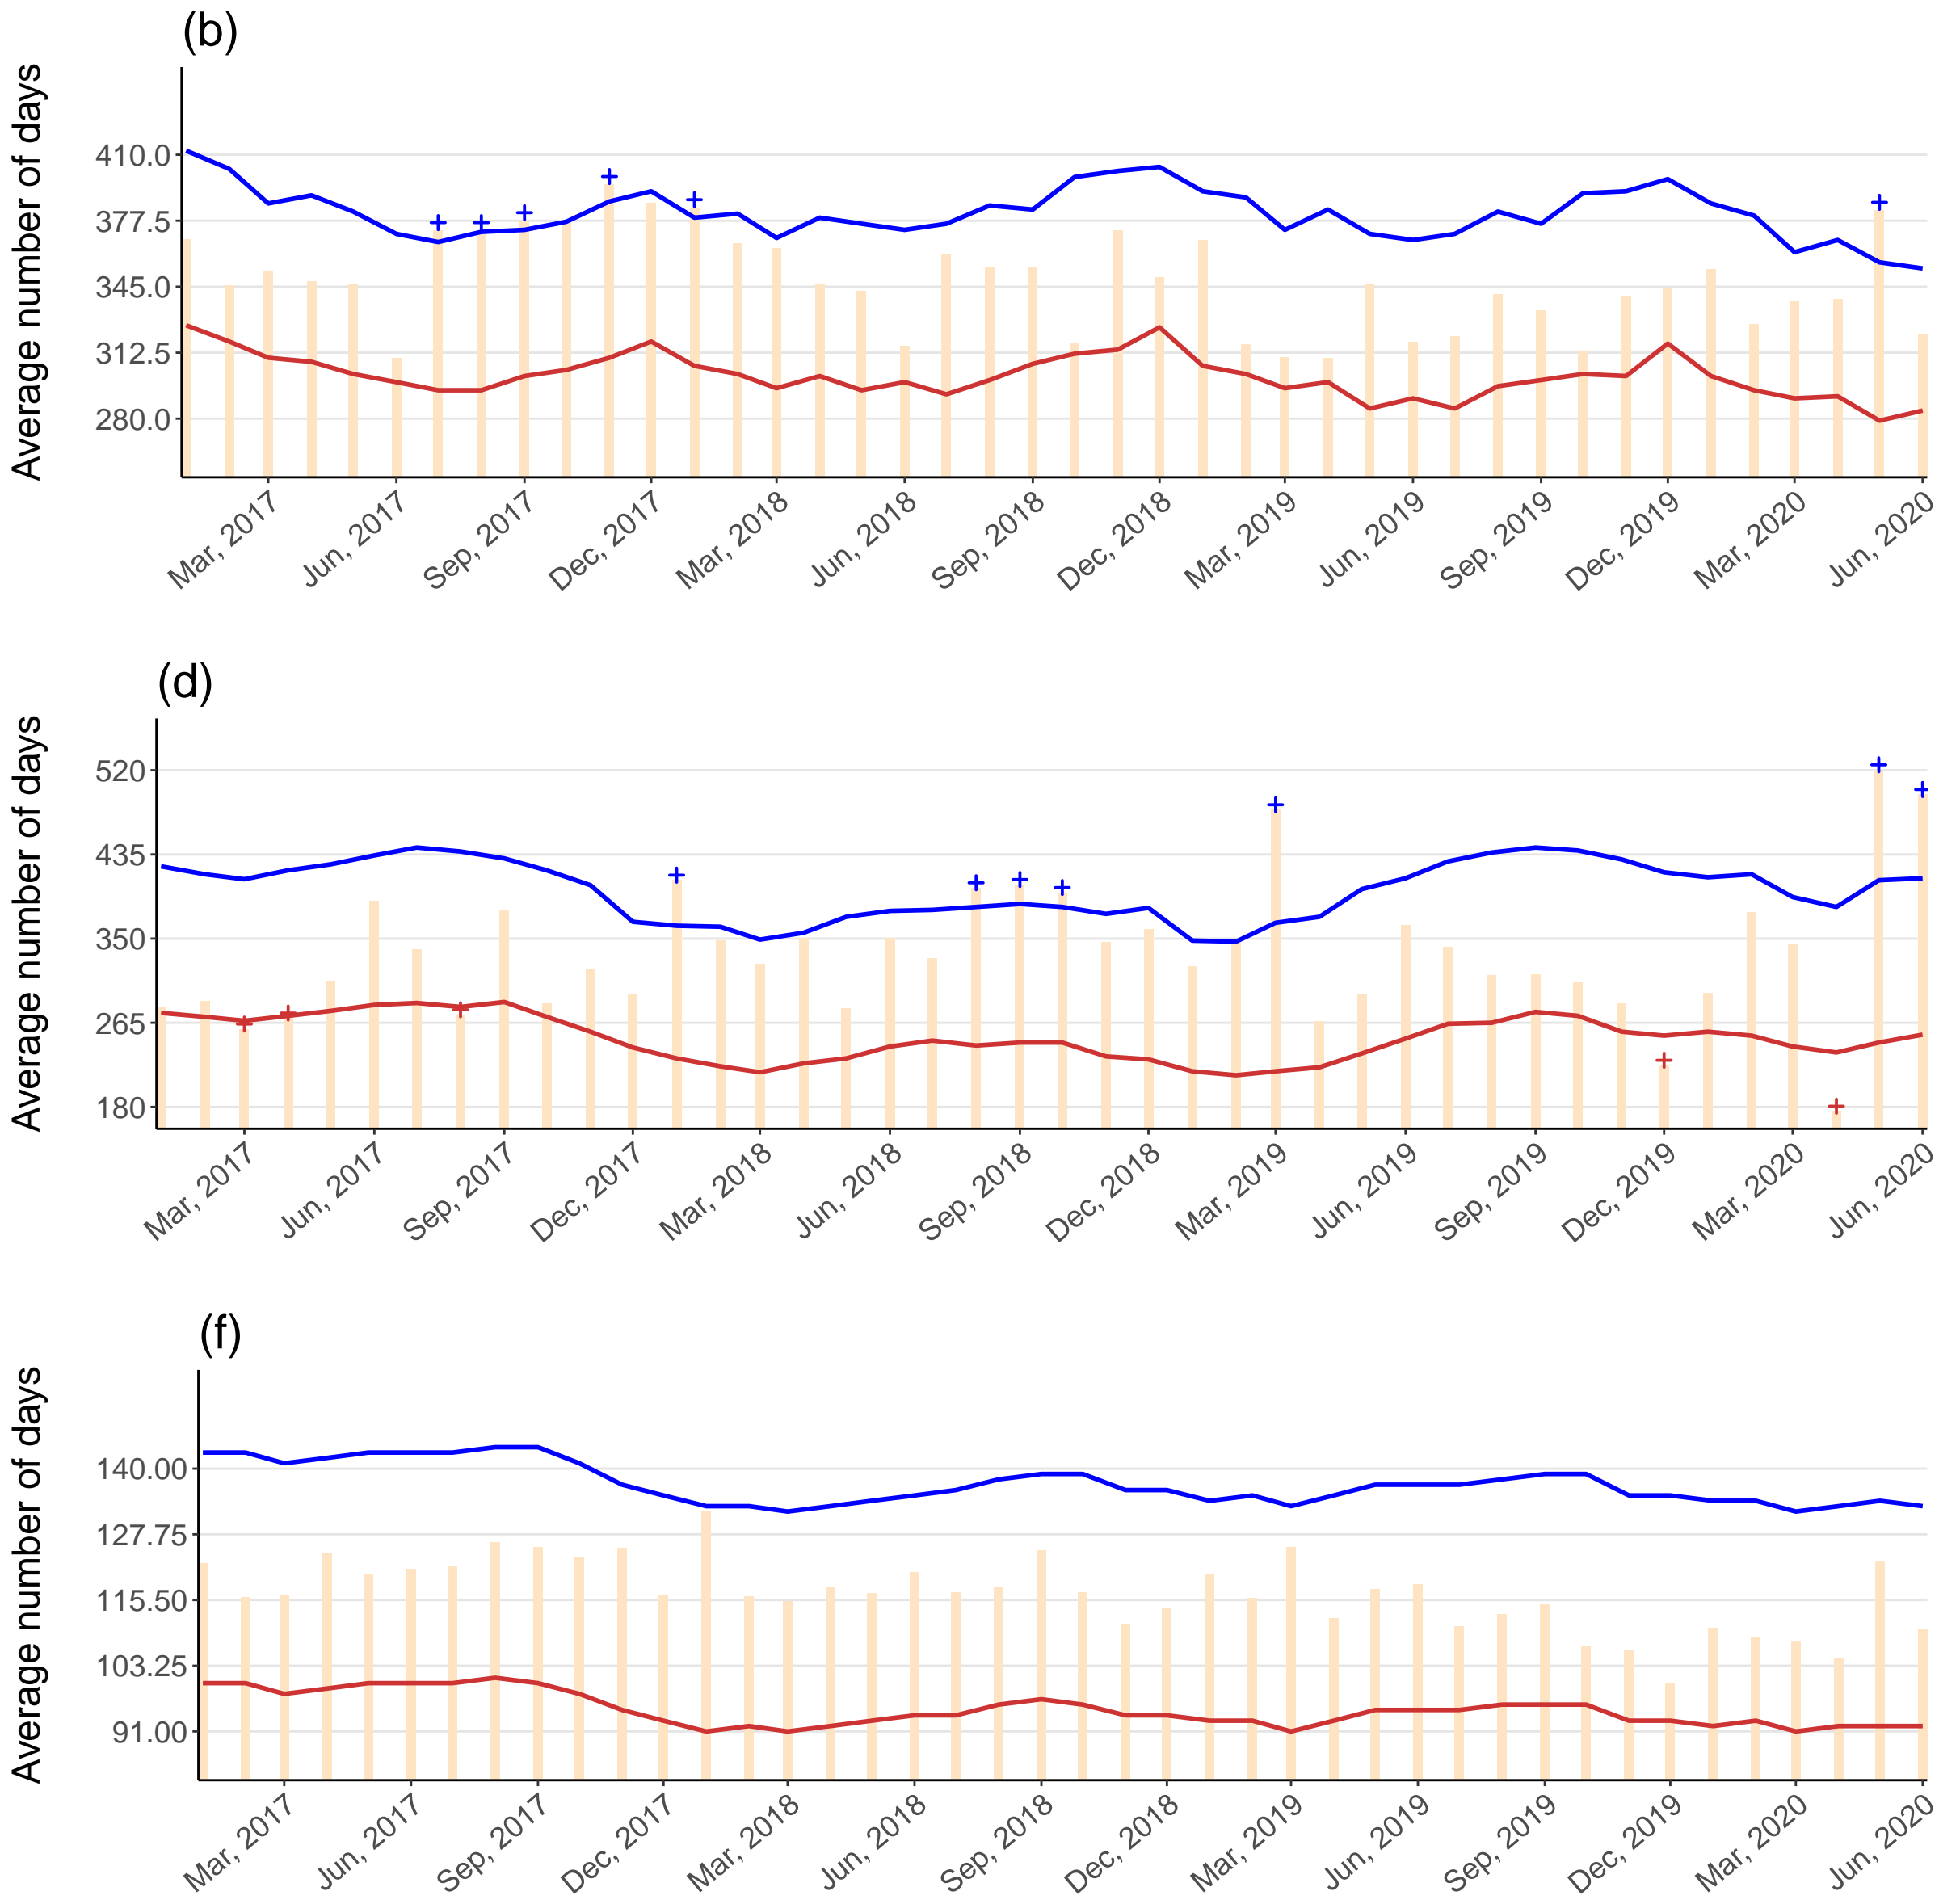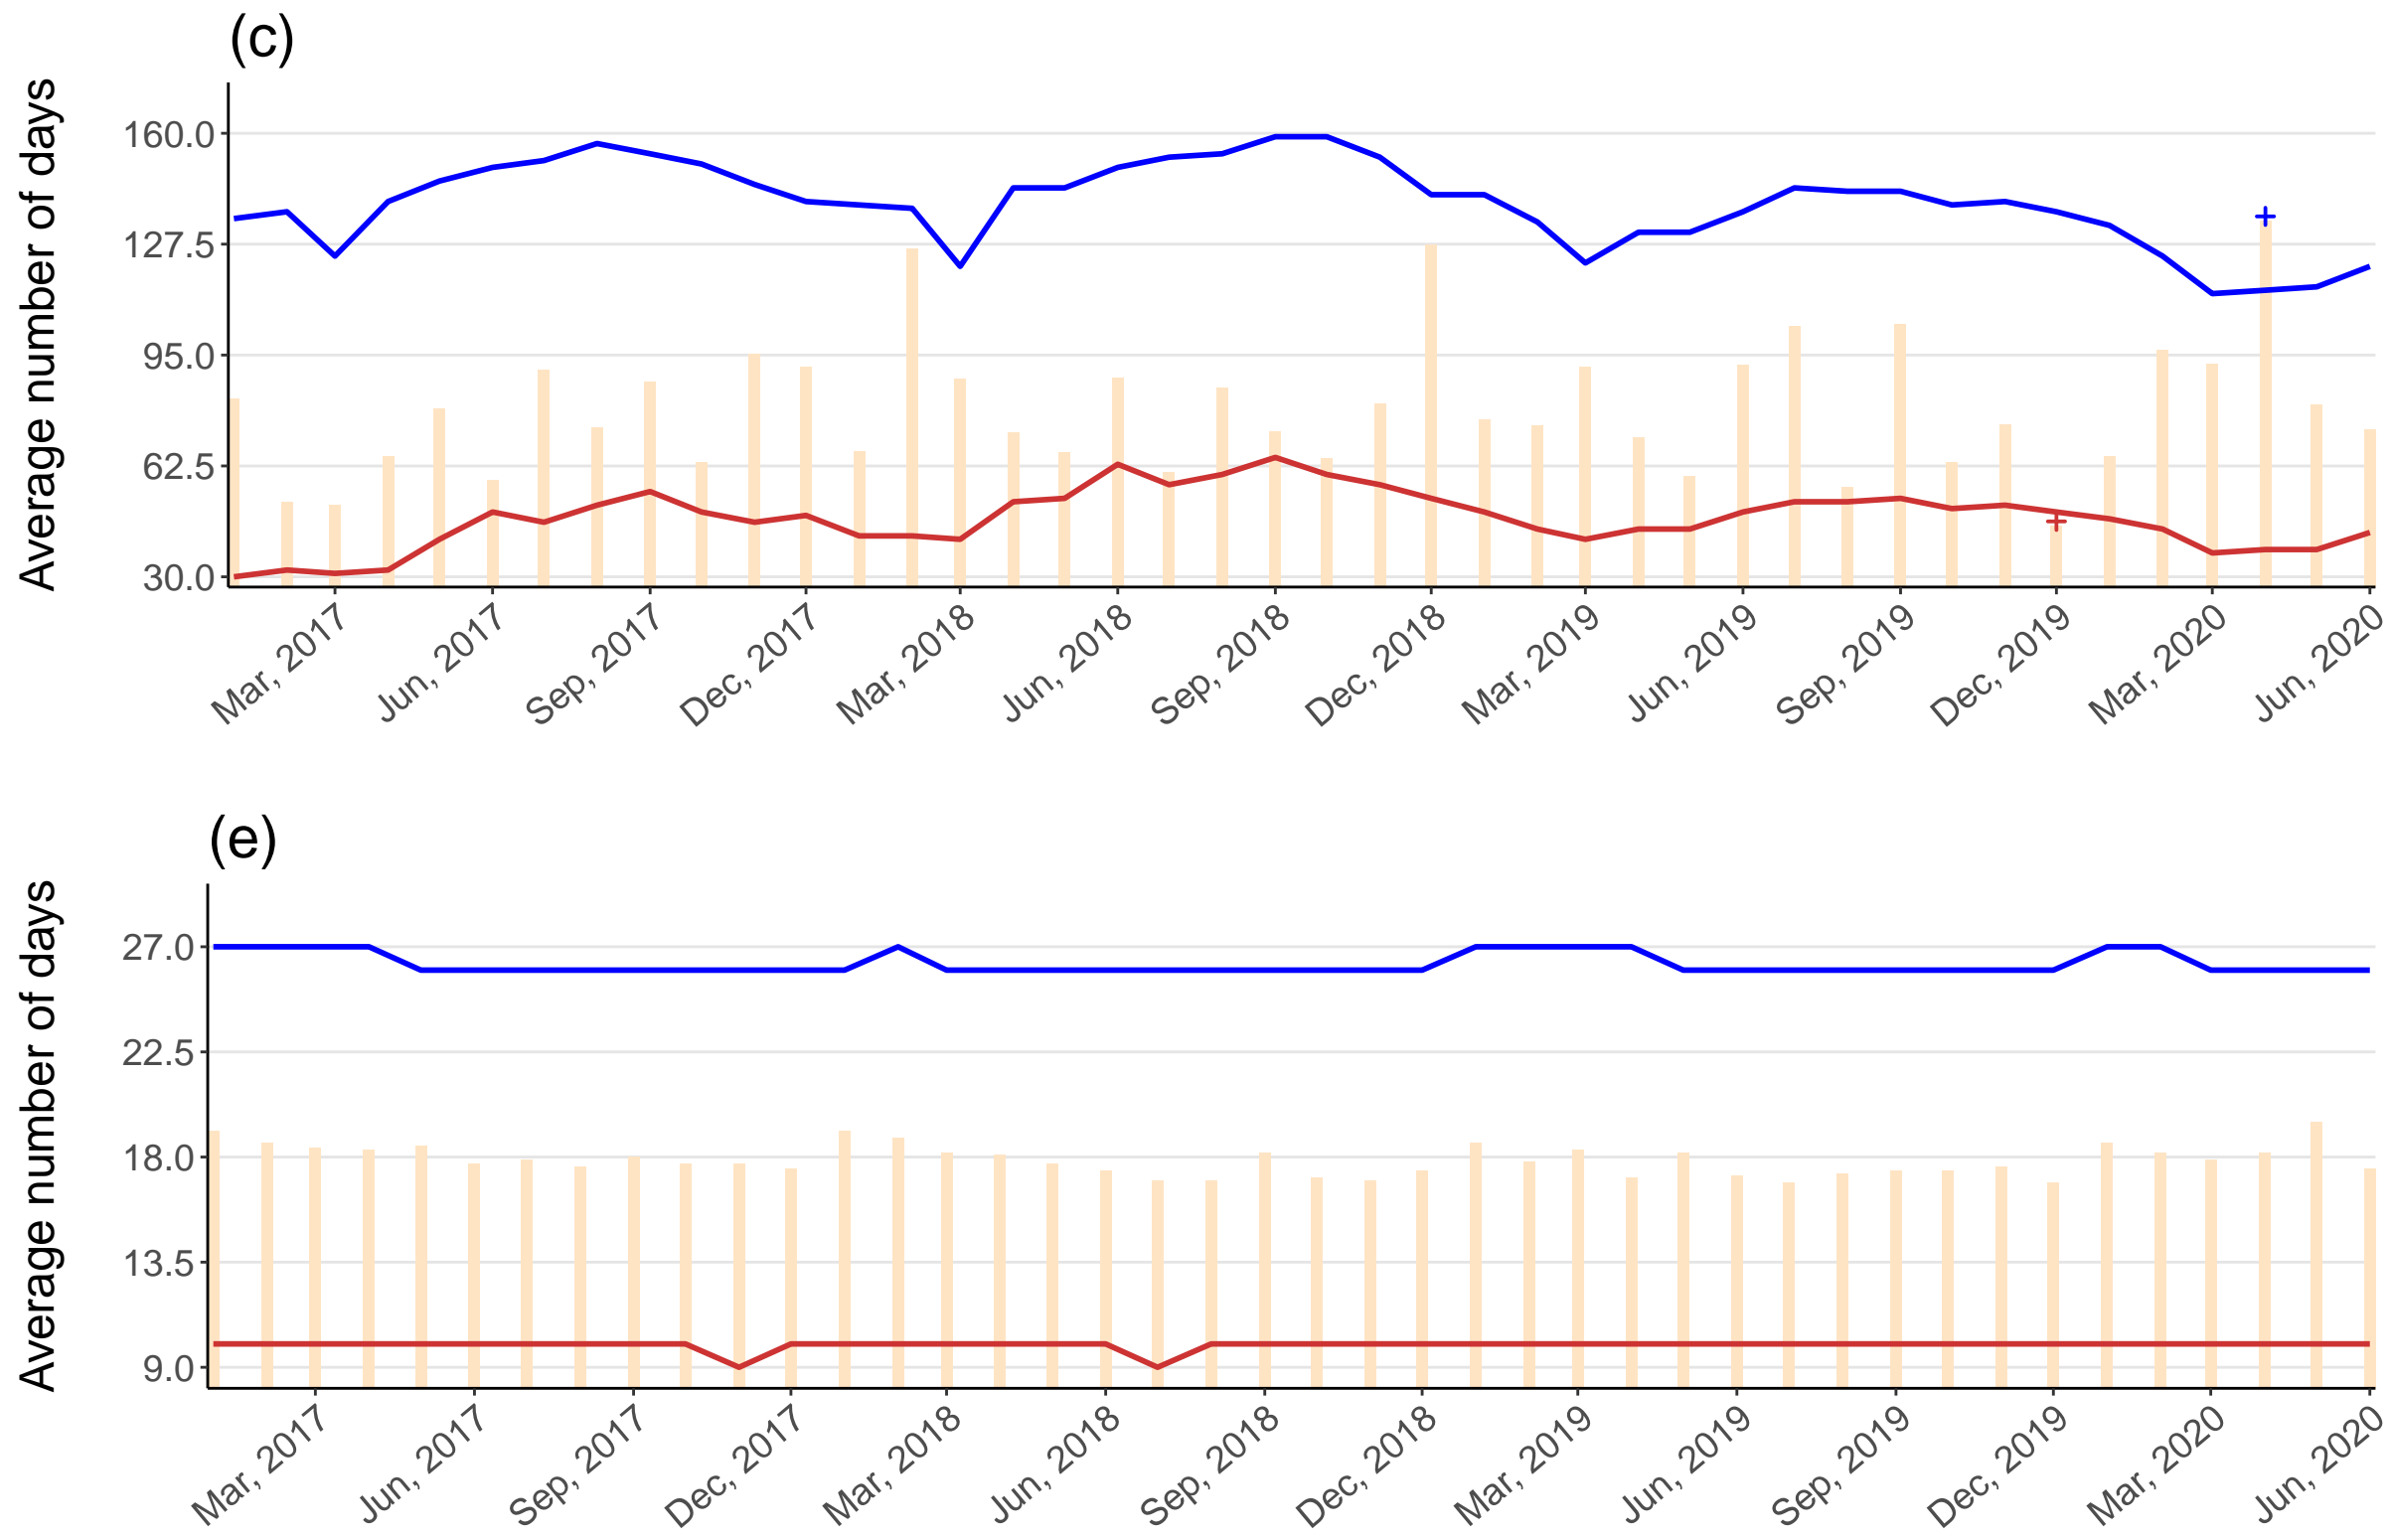



Kagawa

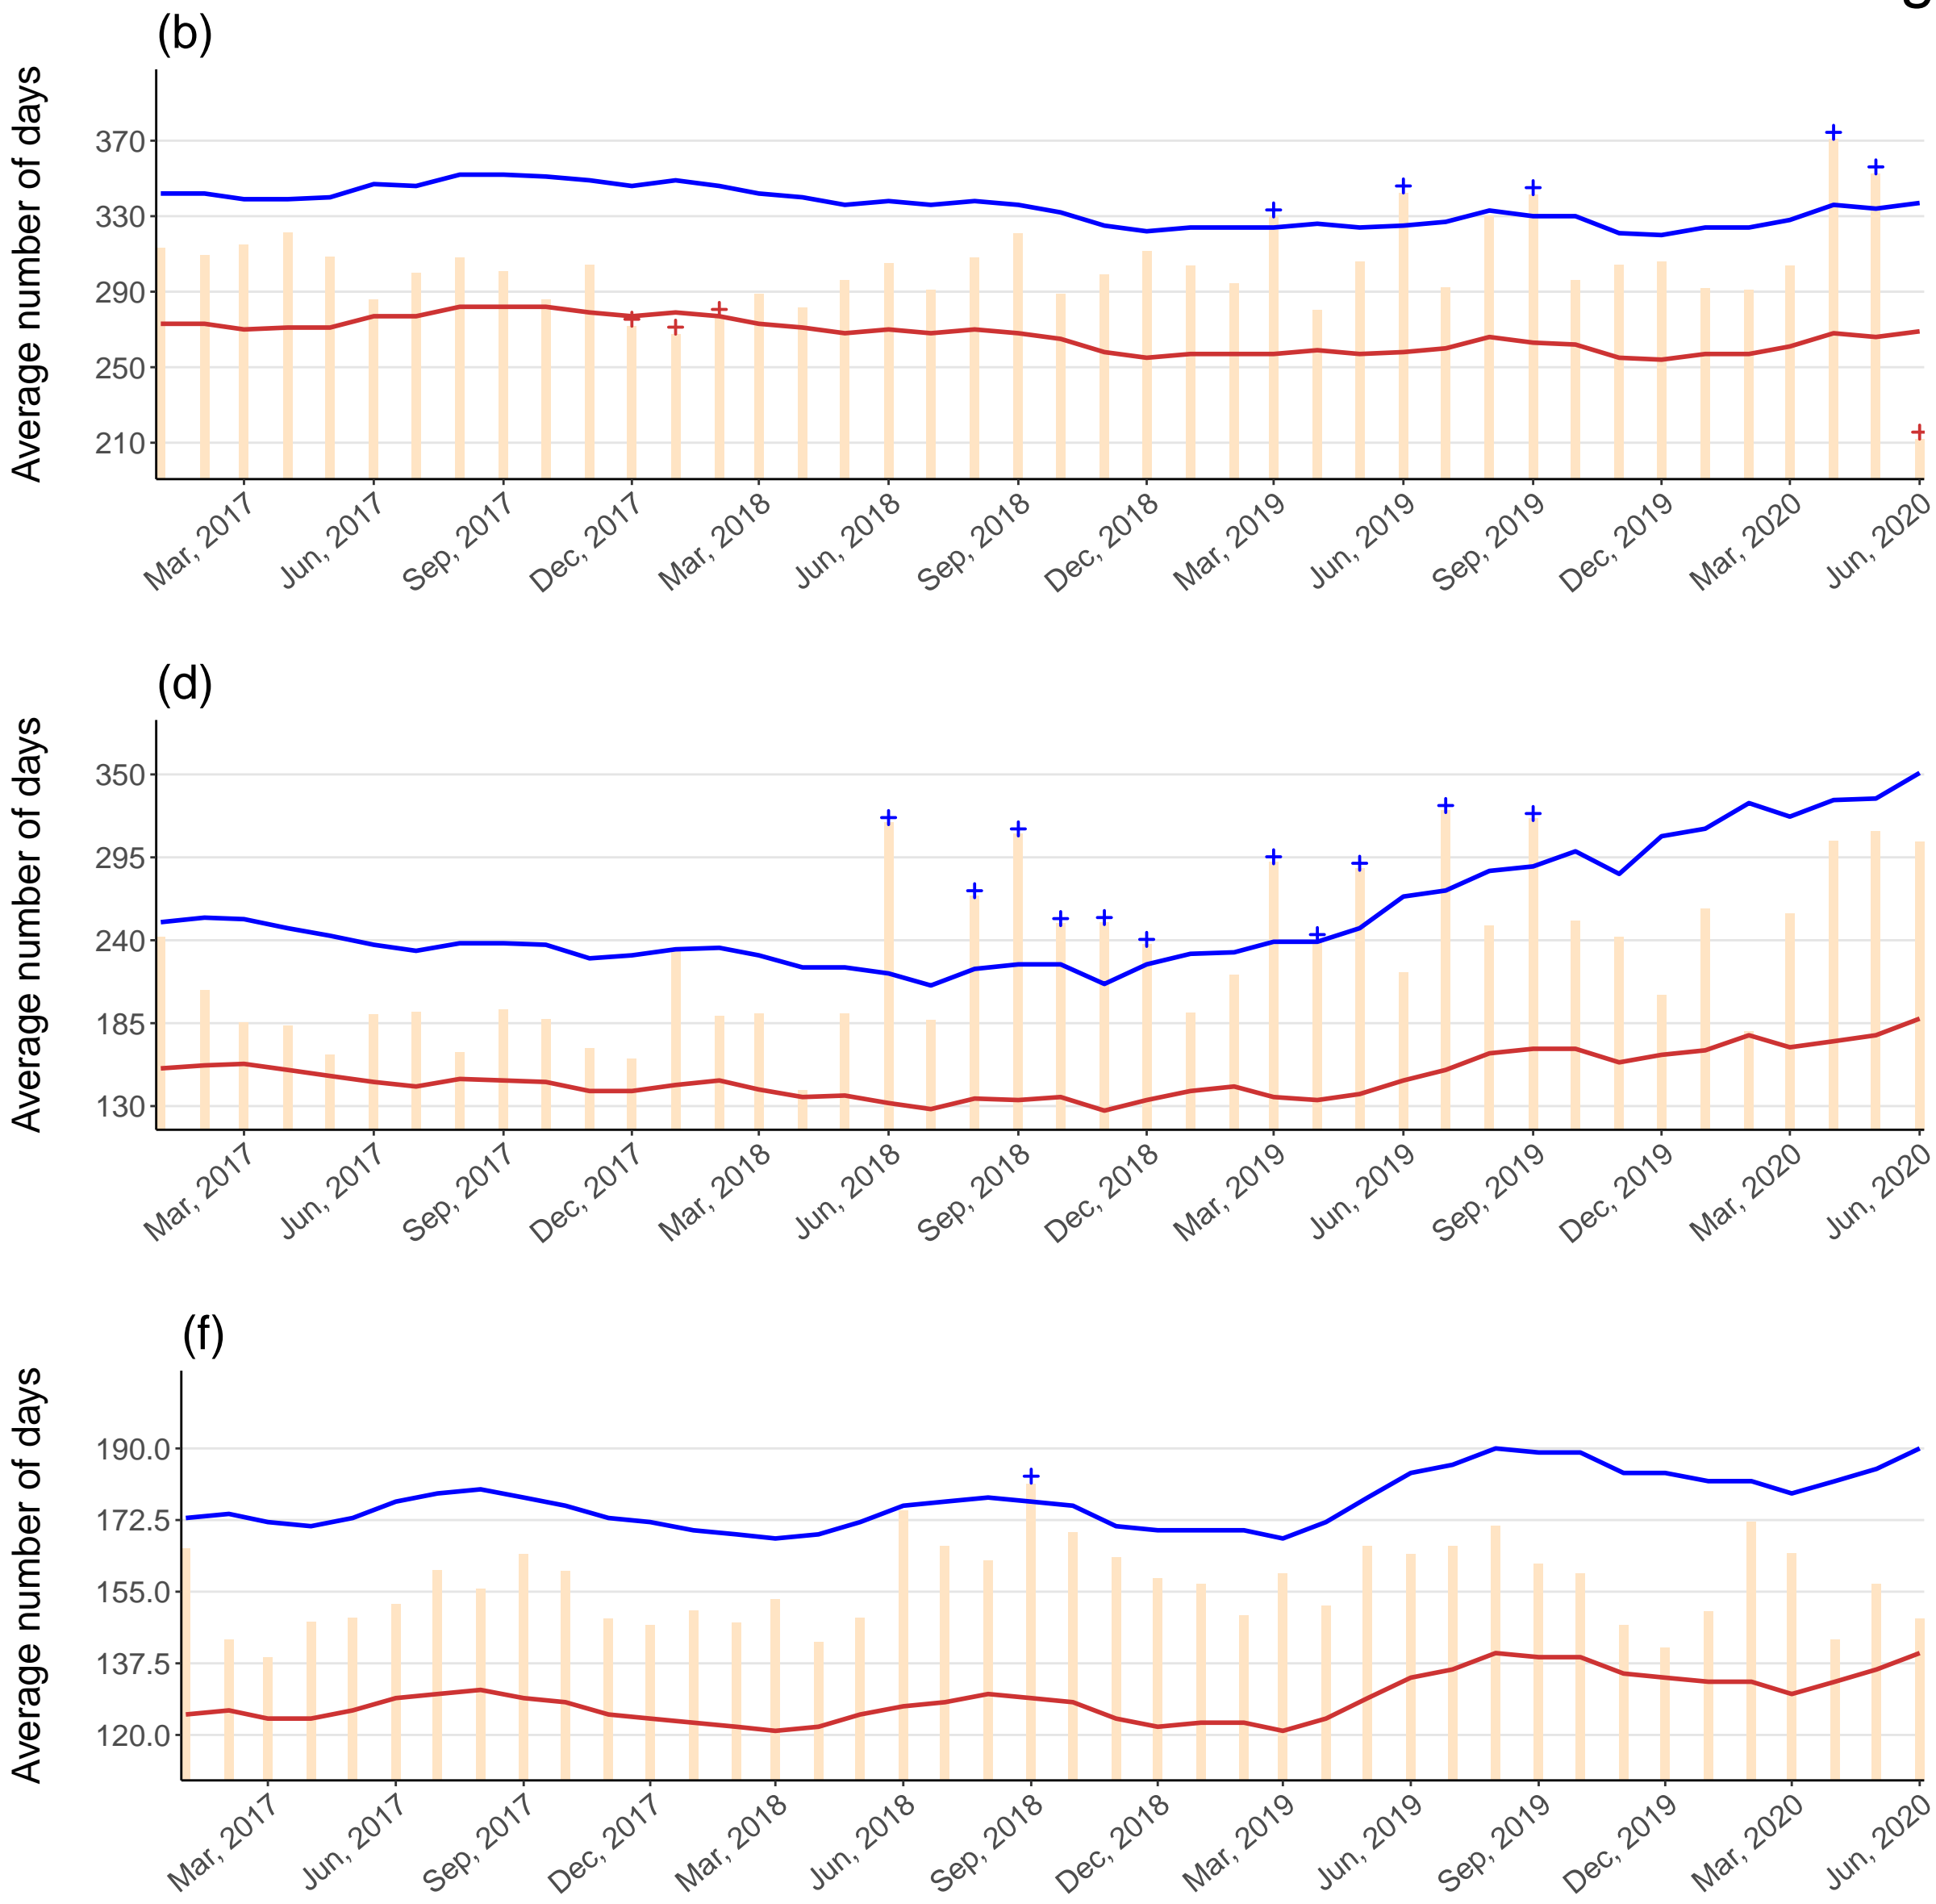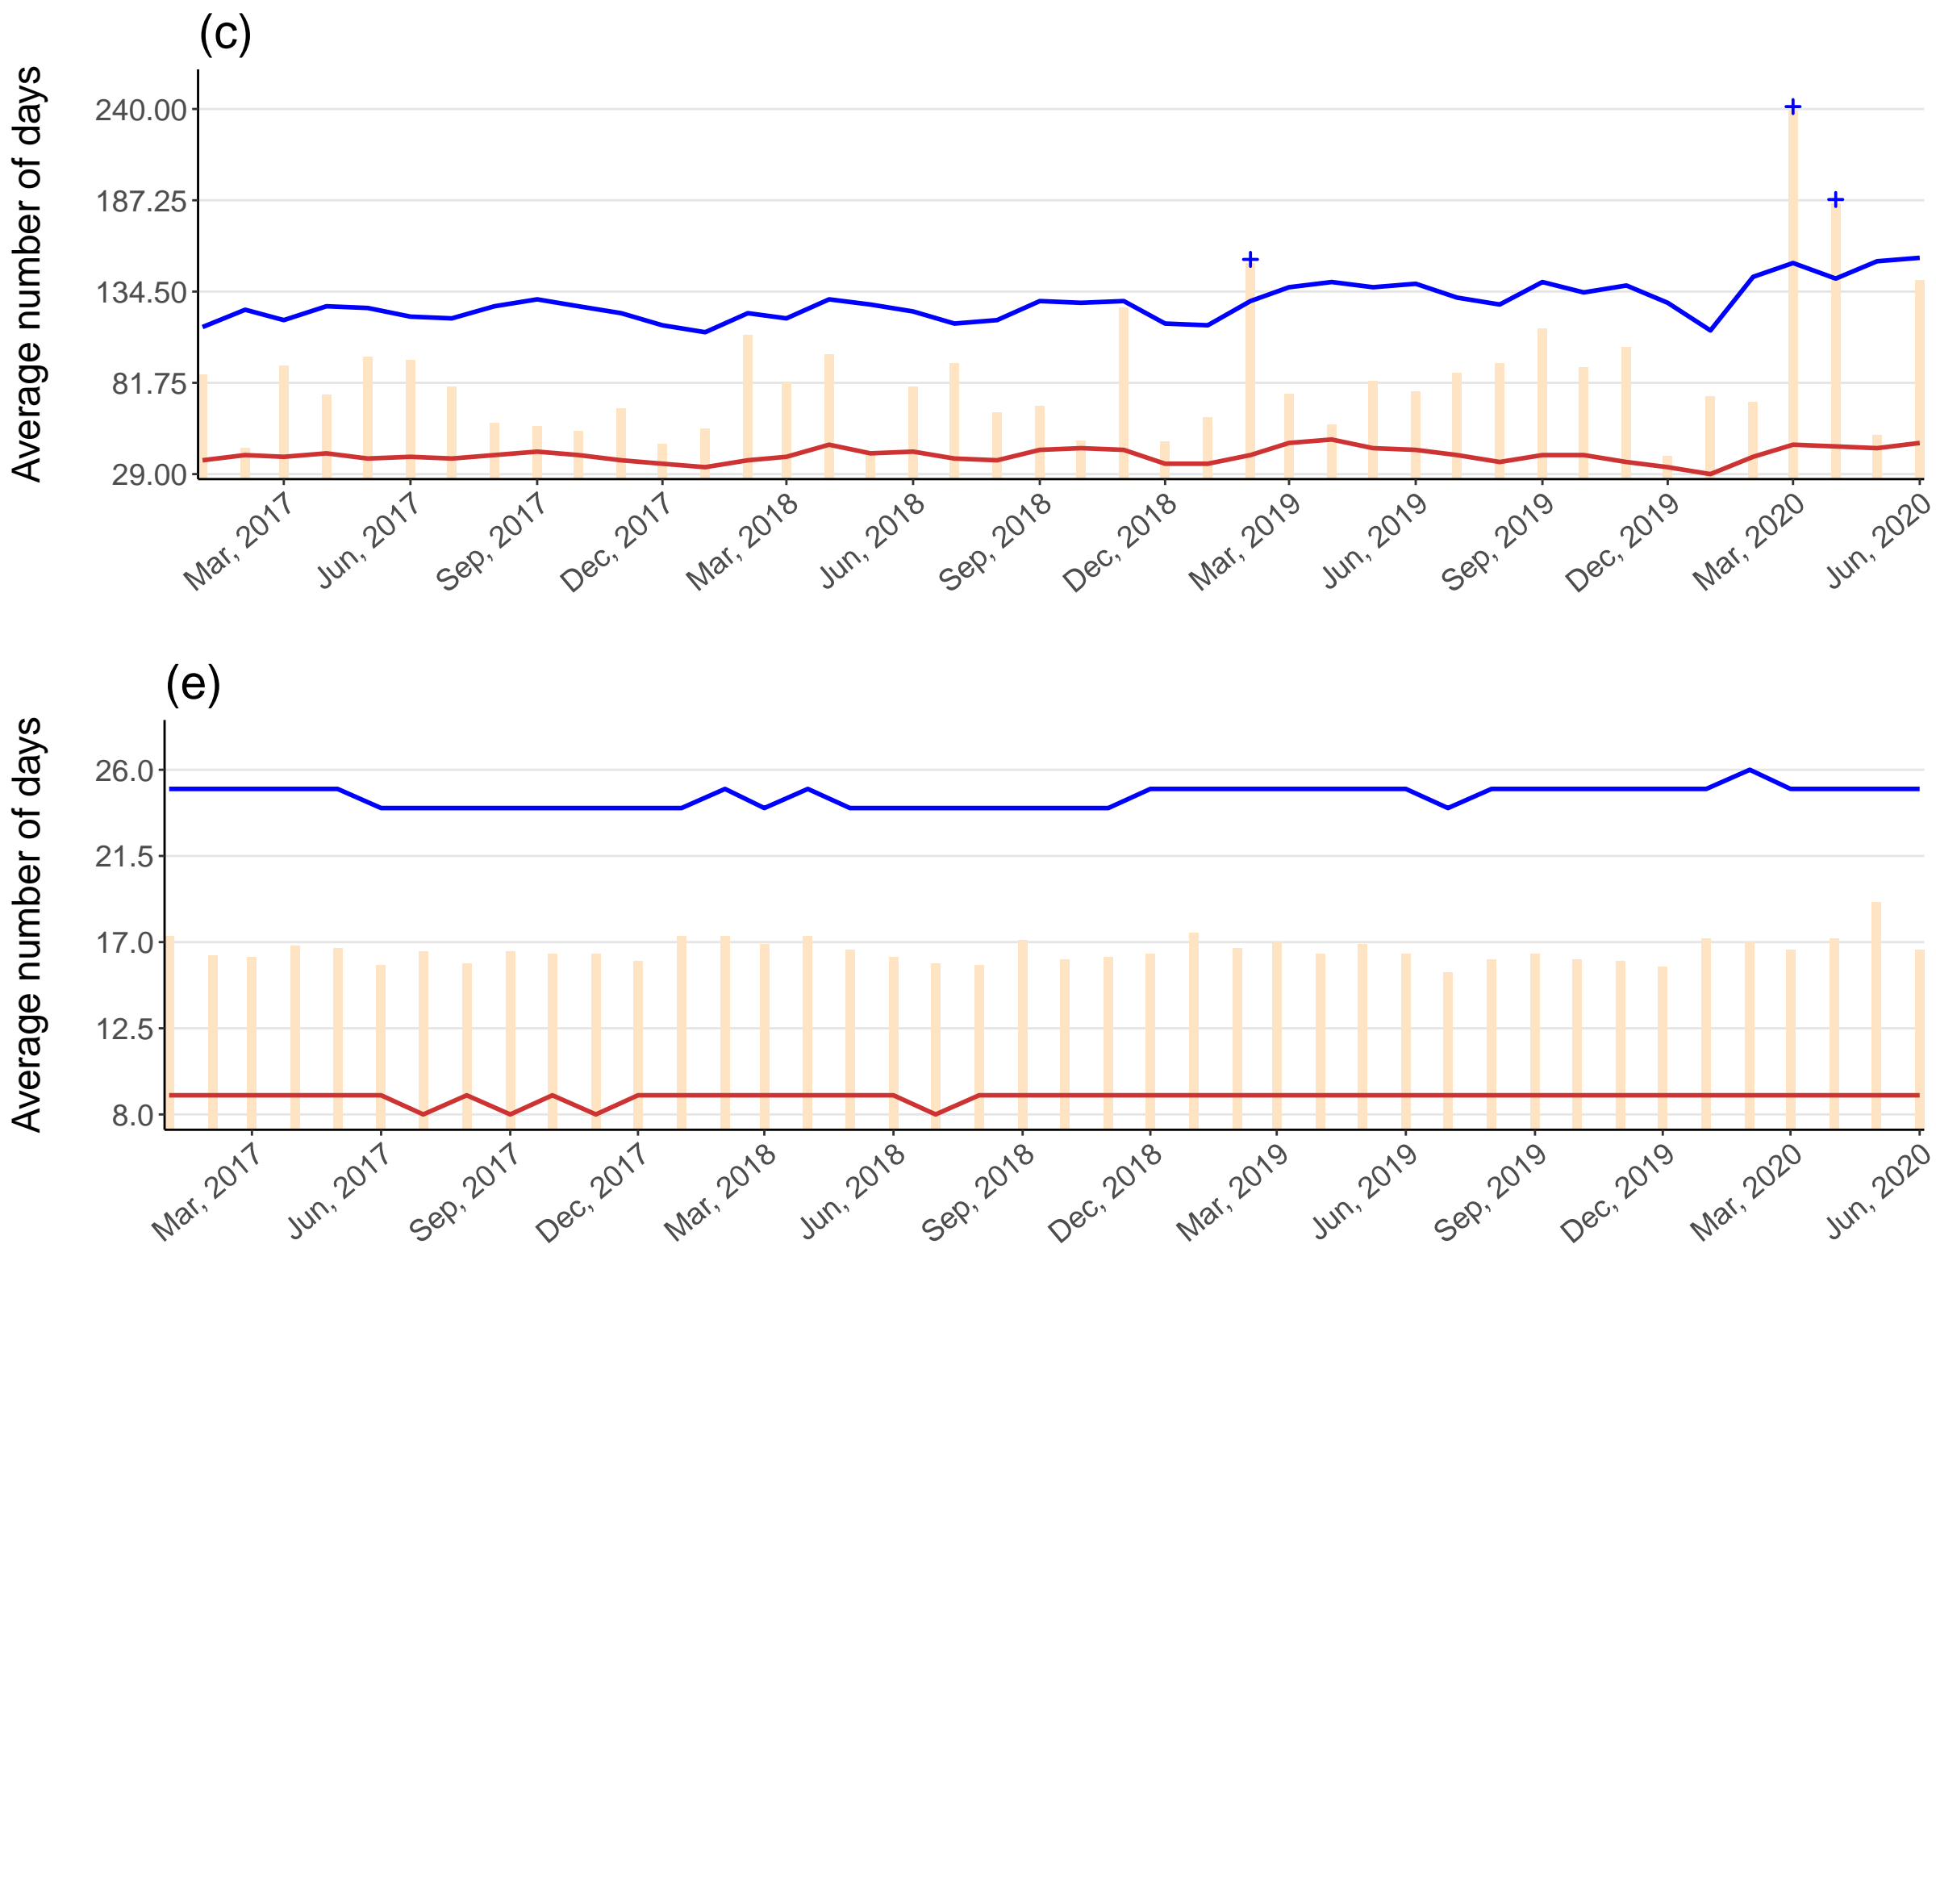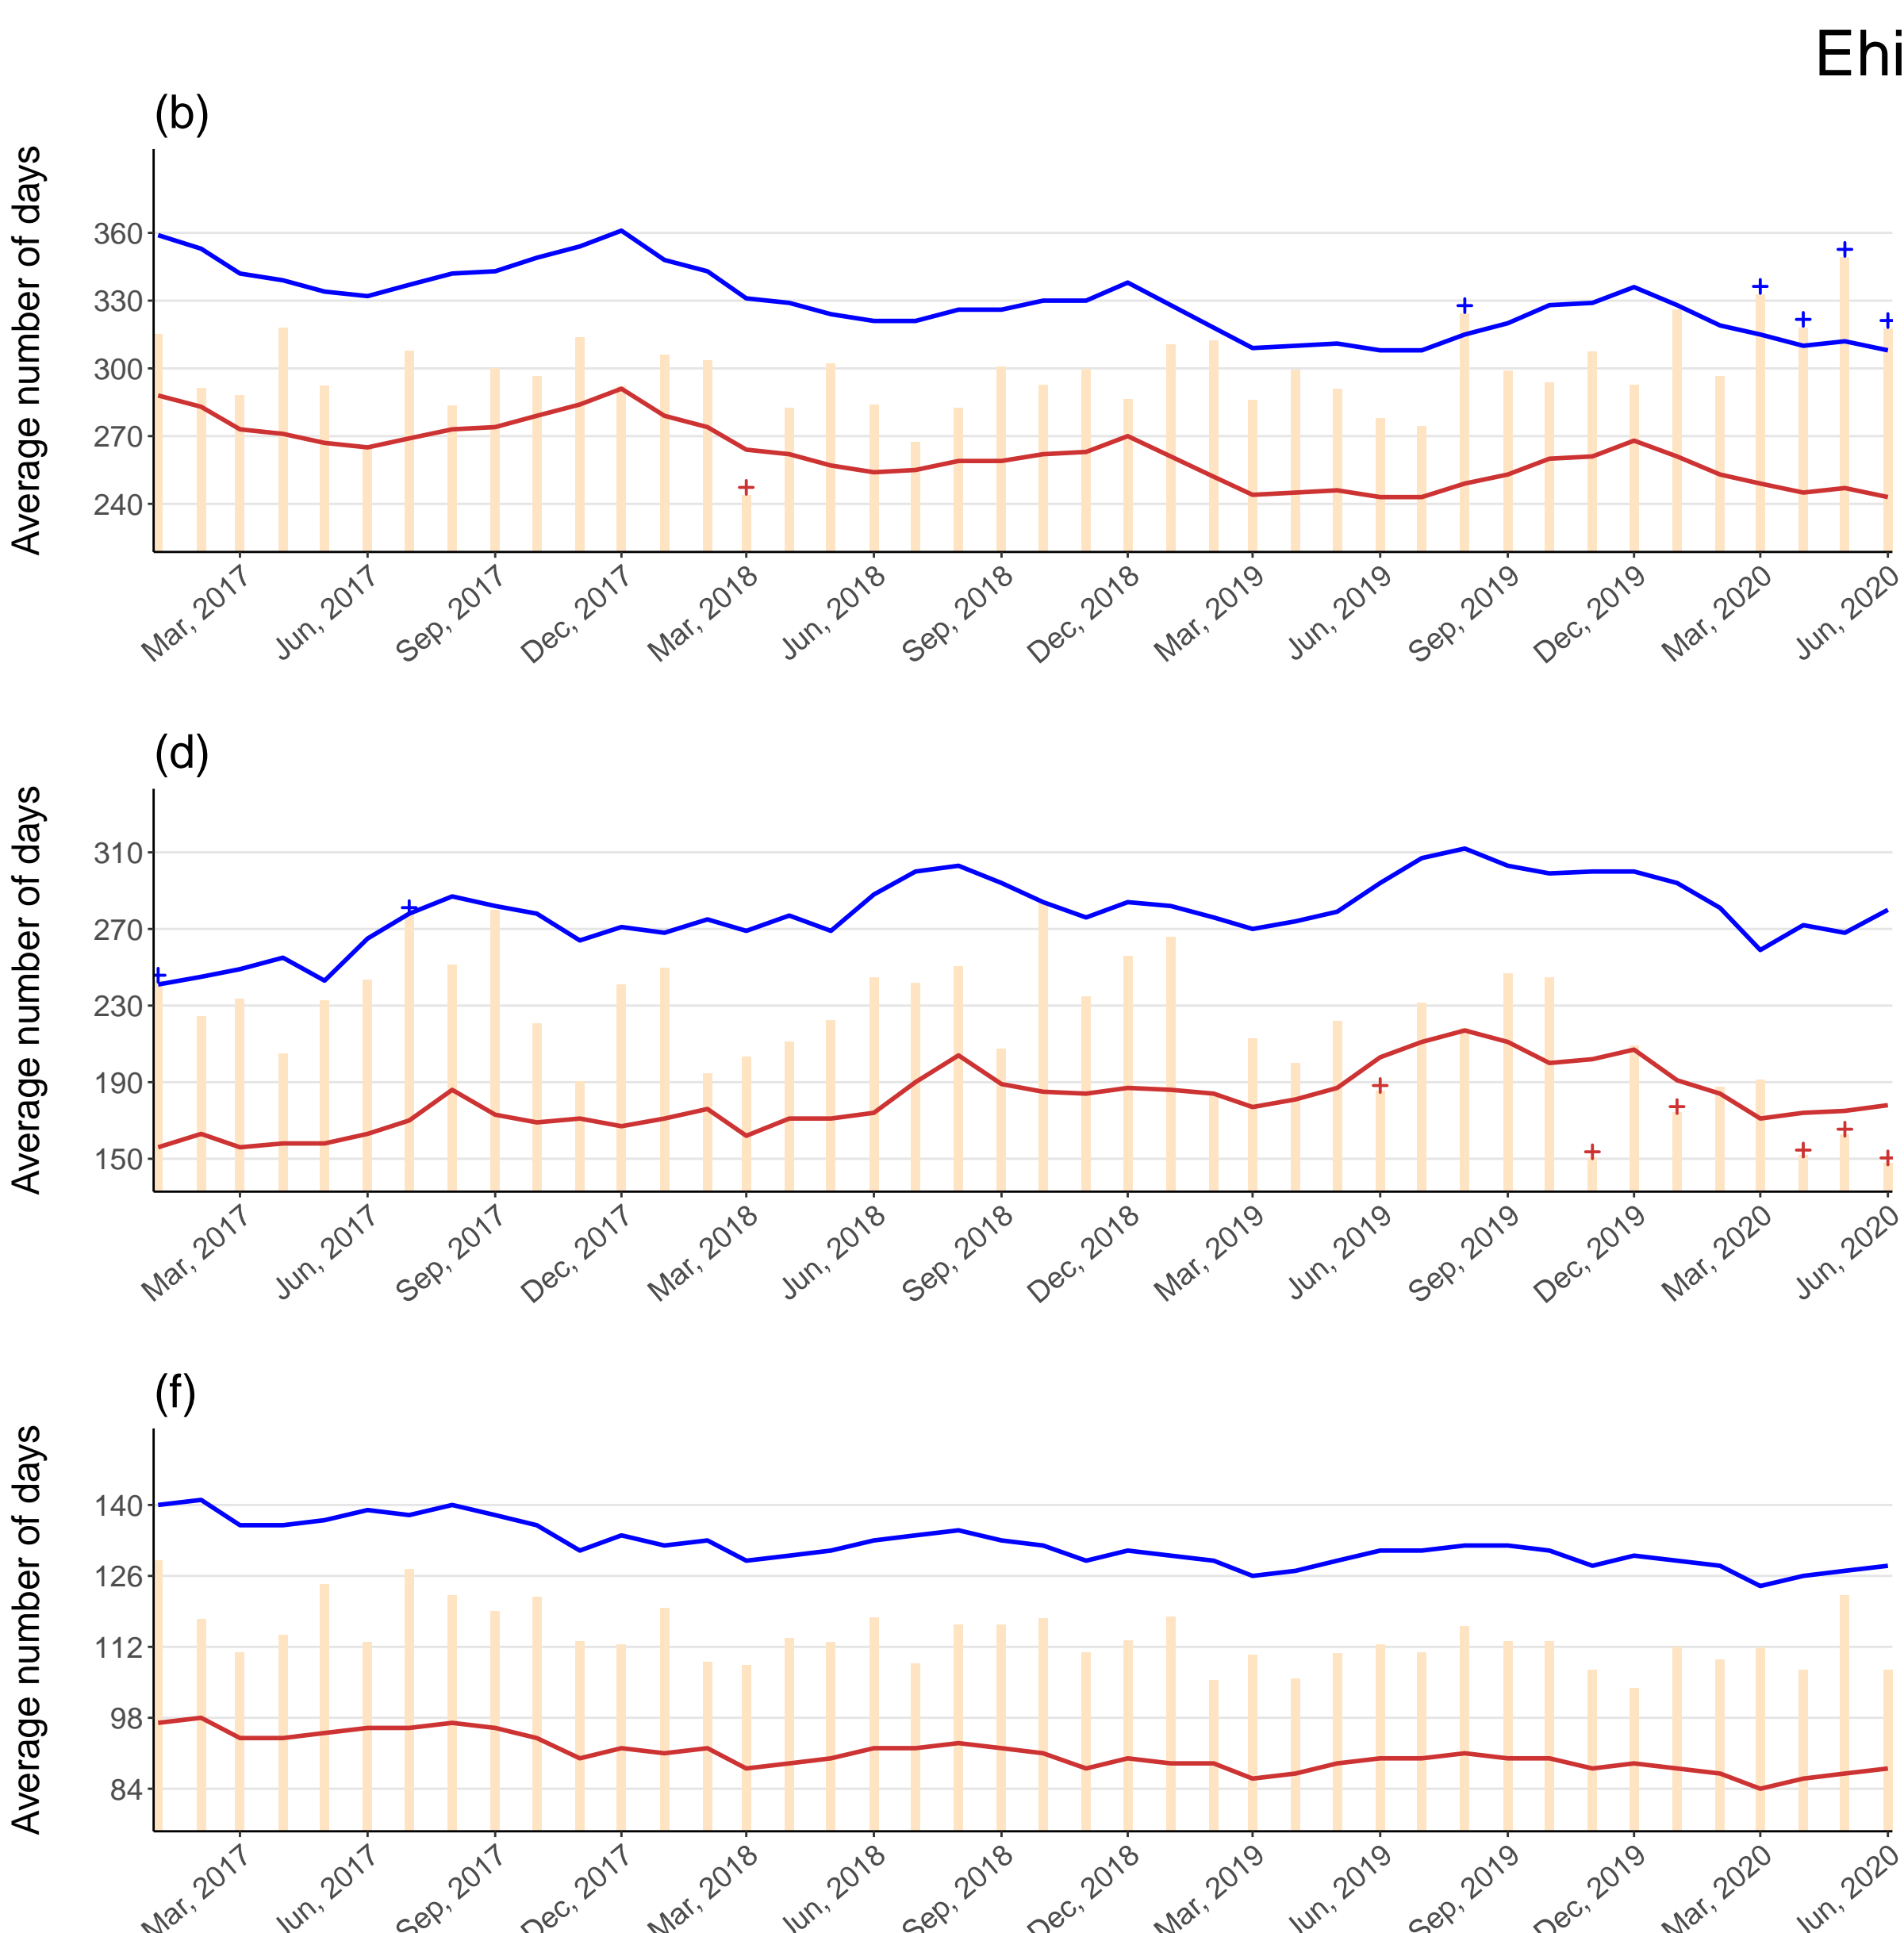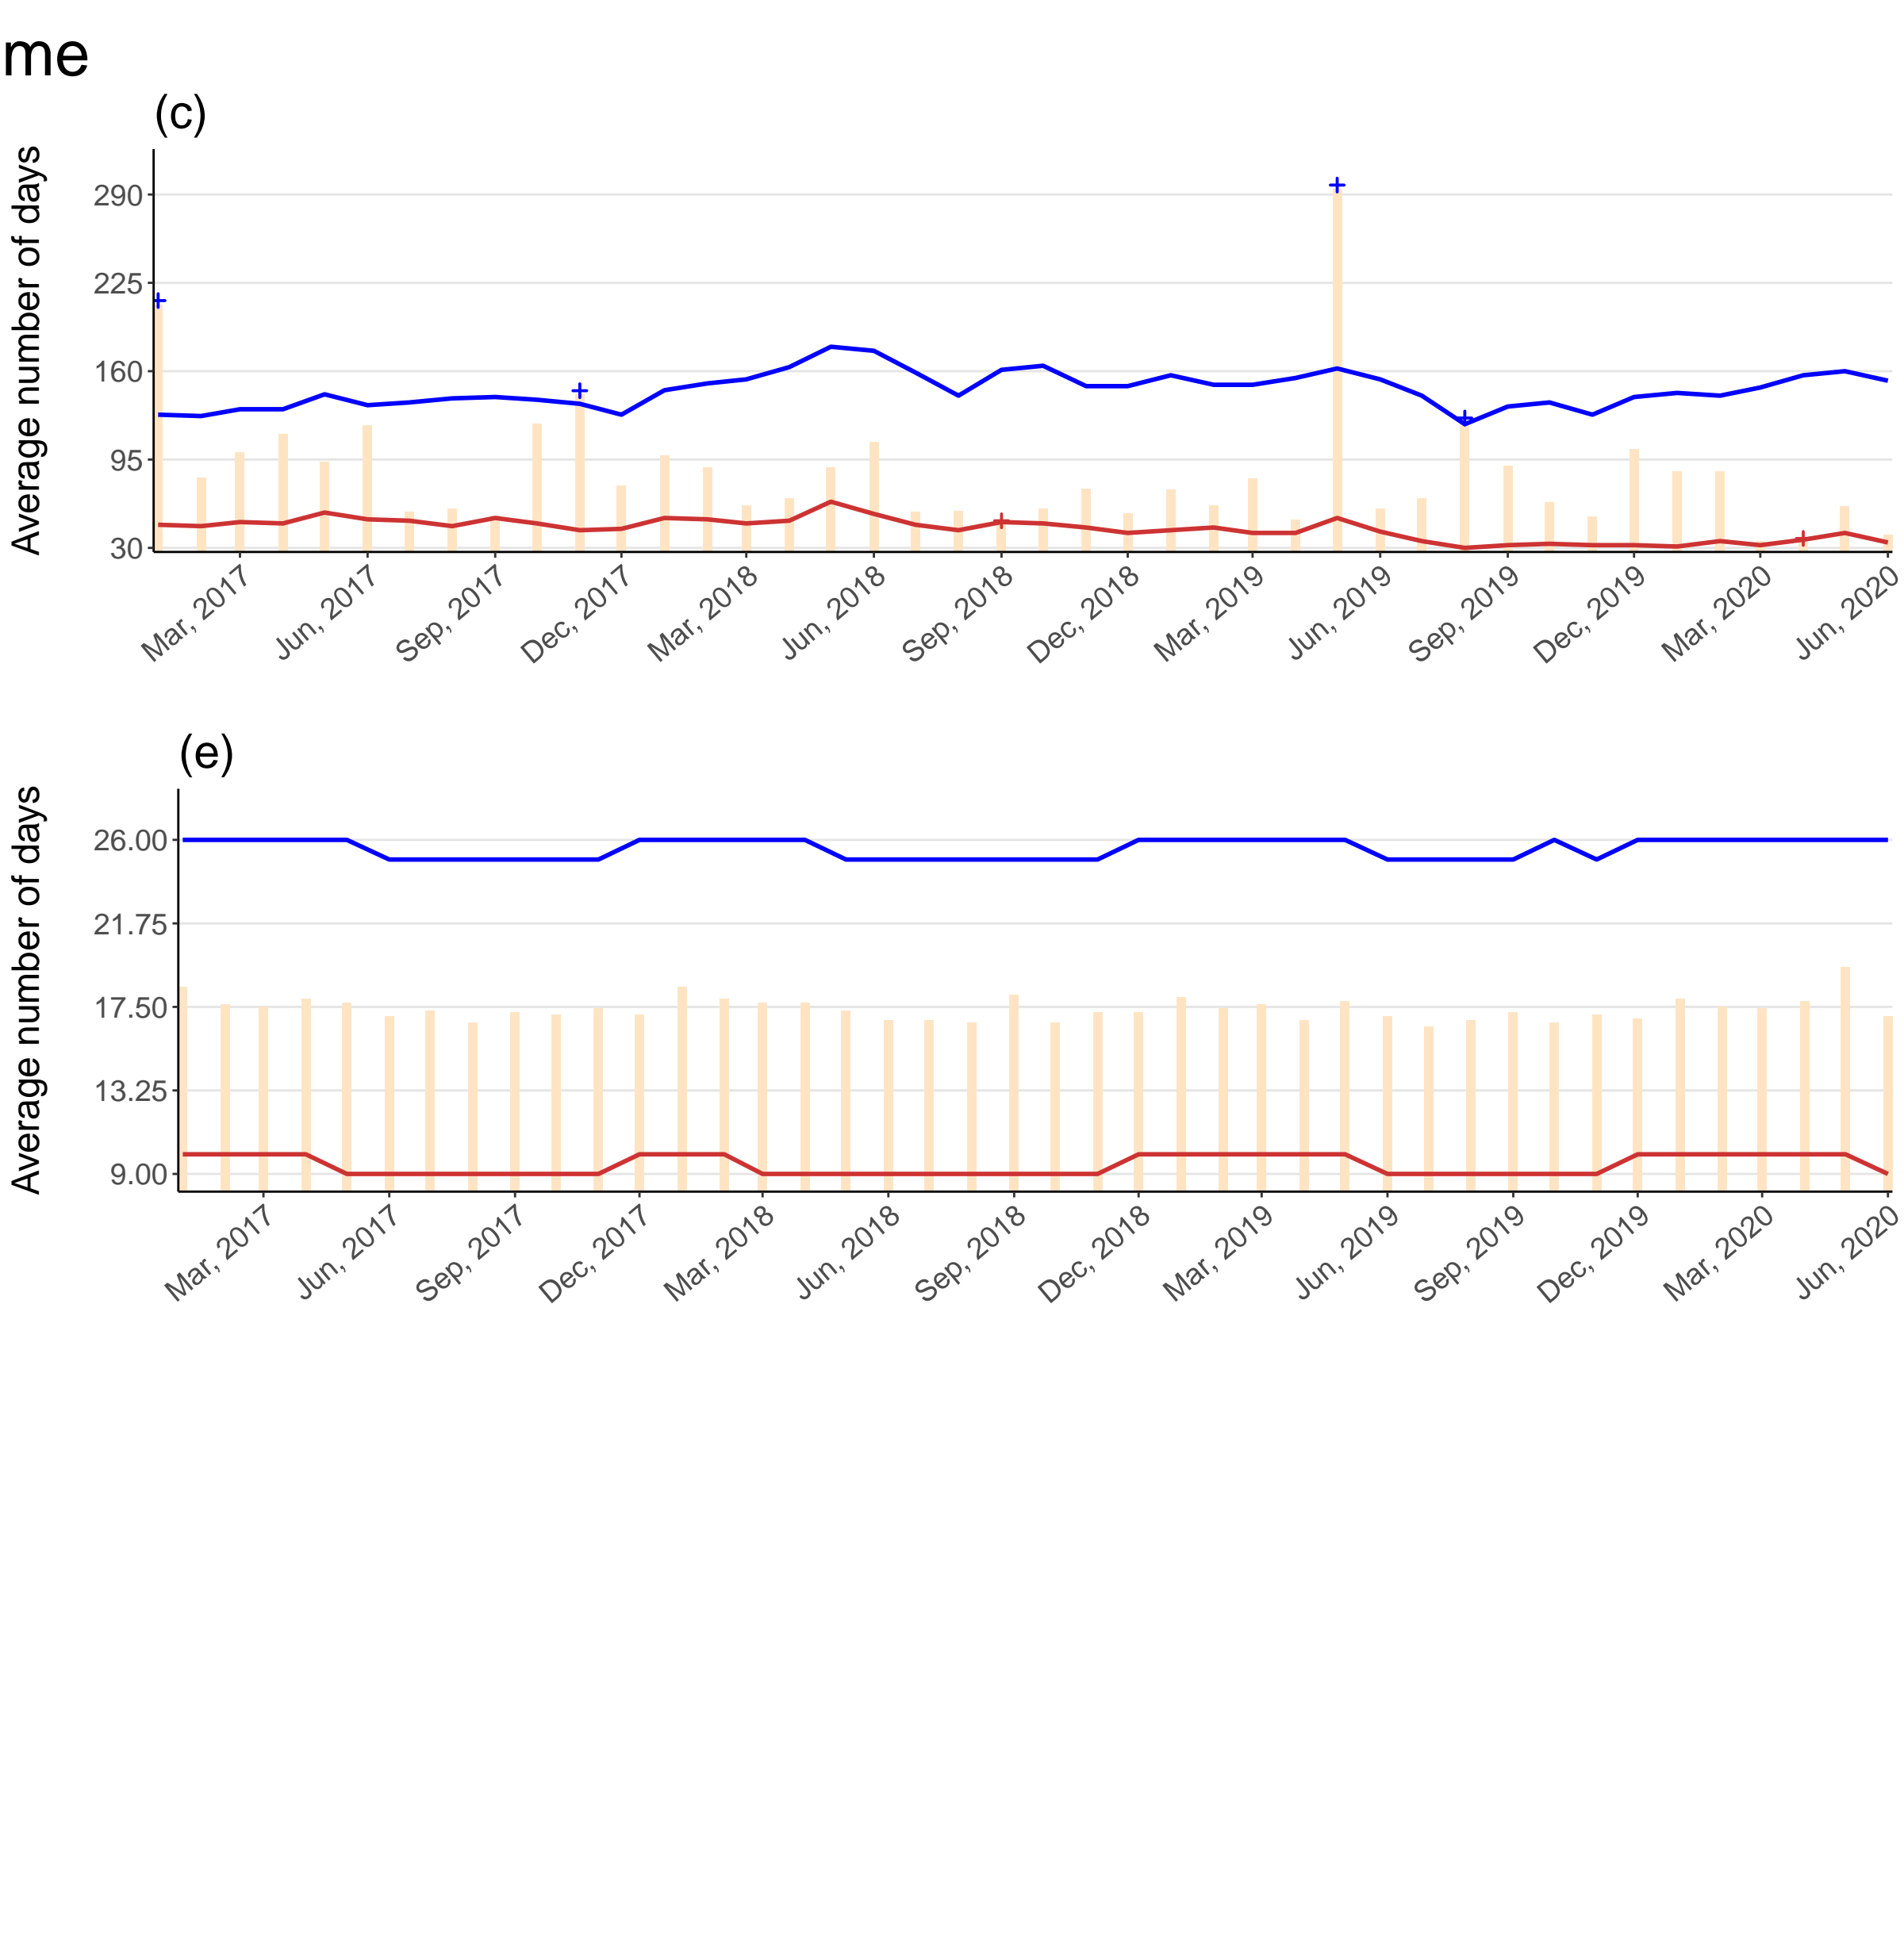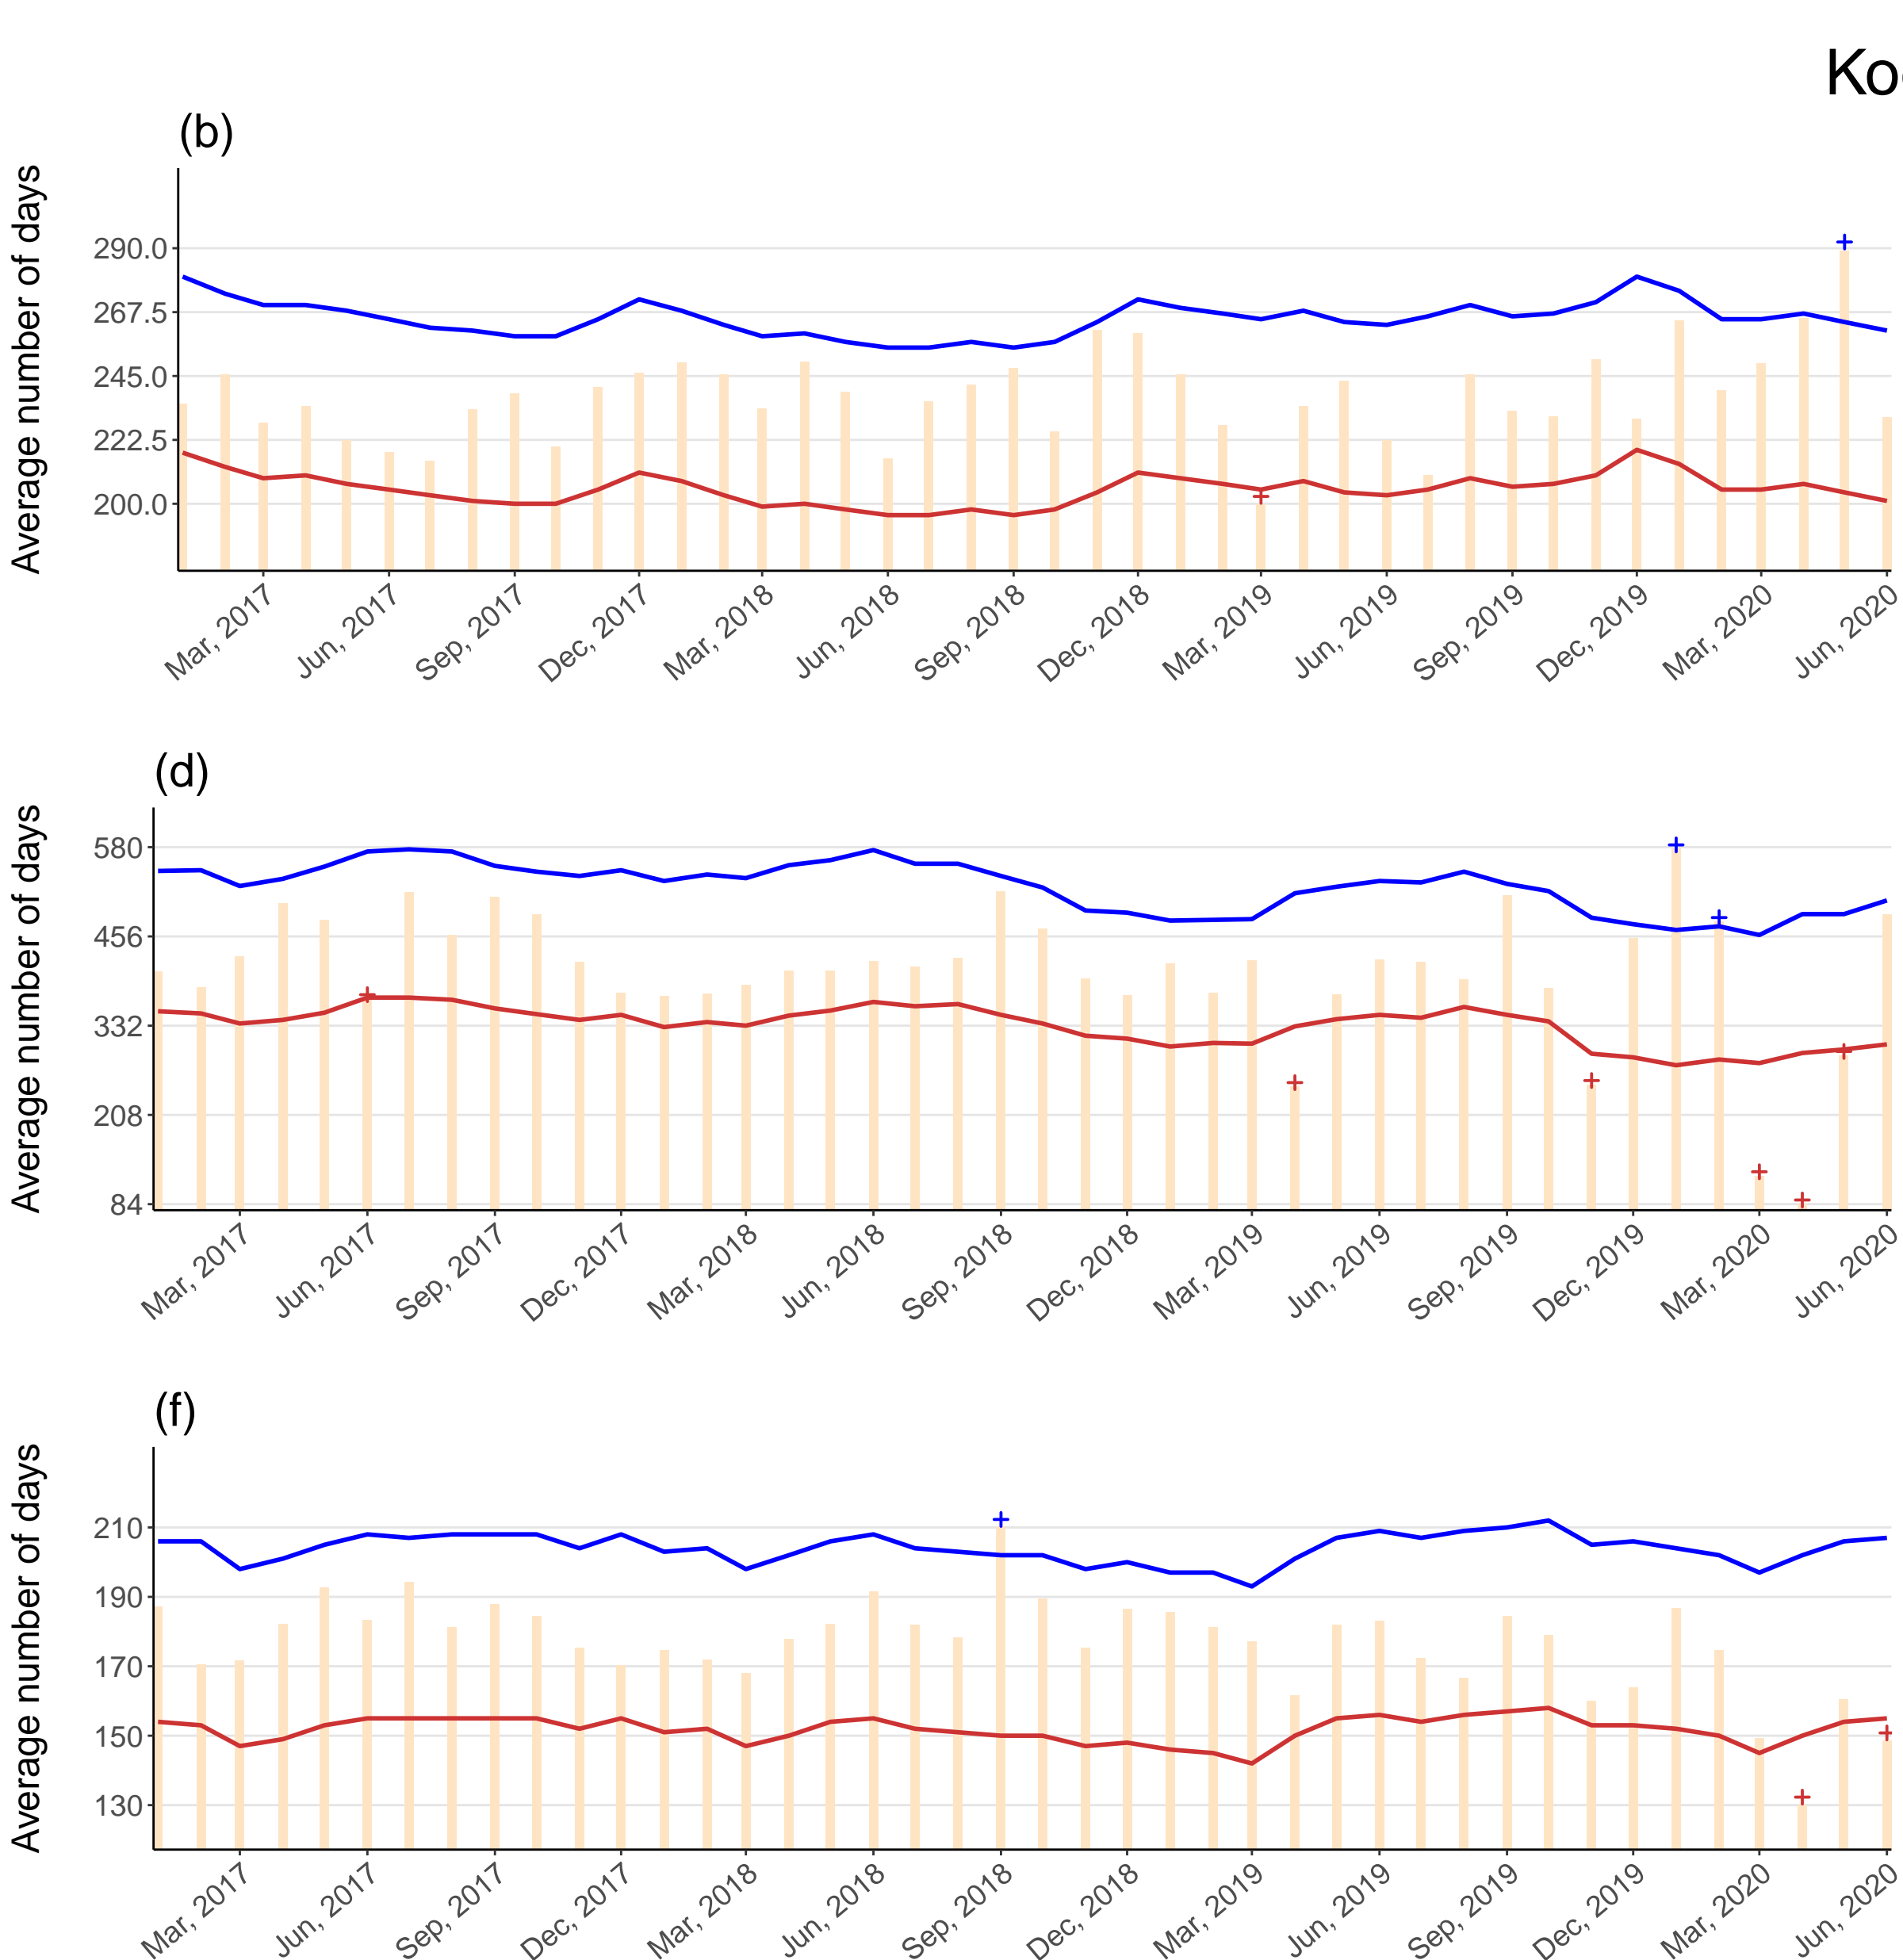

Ehime

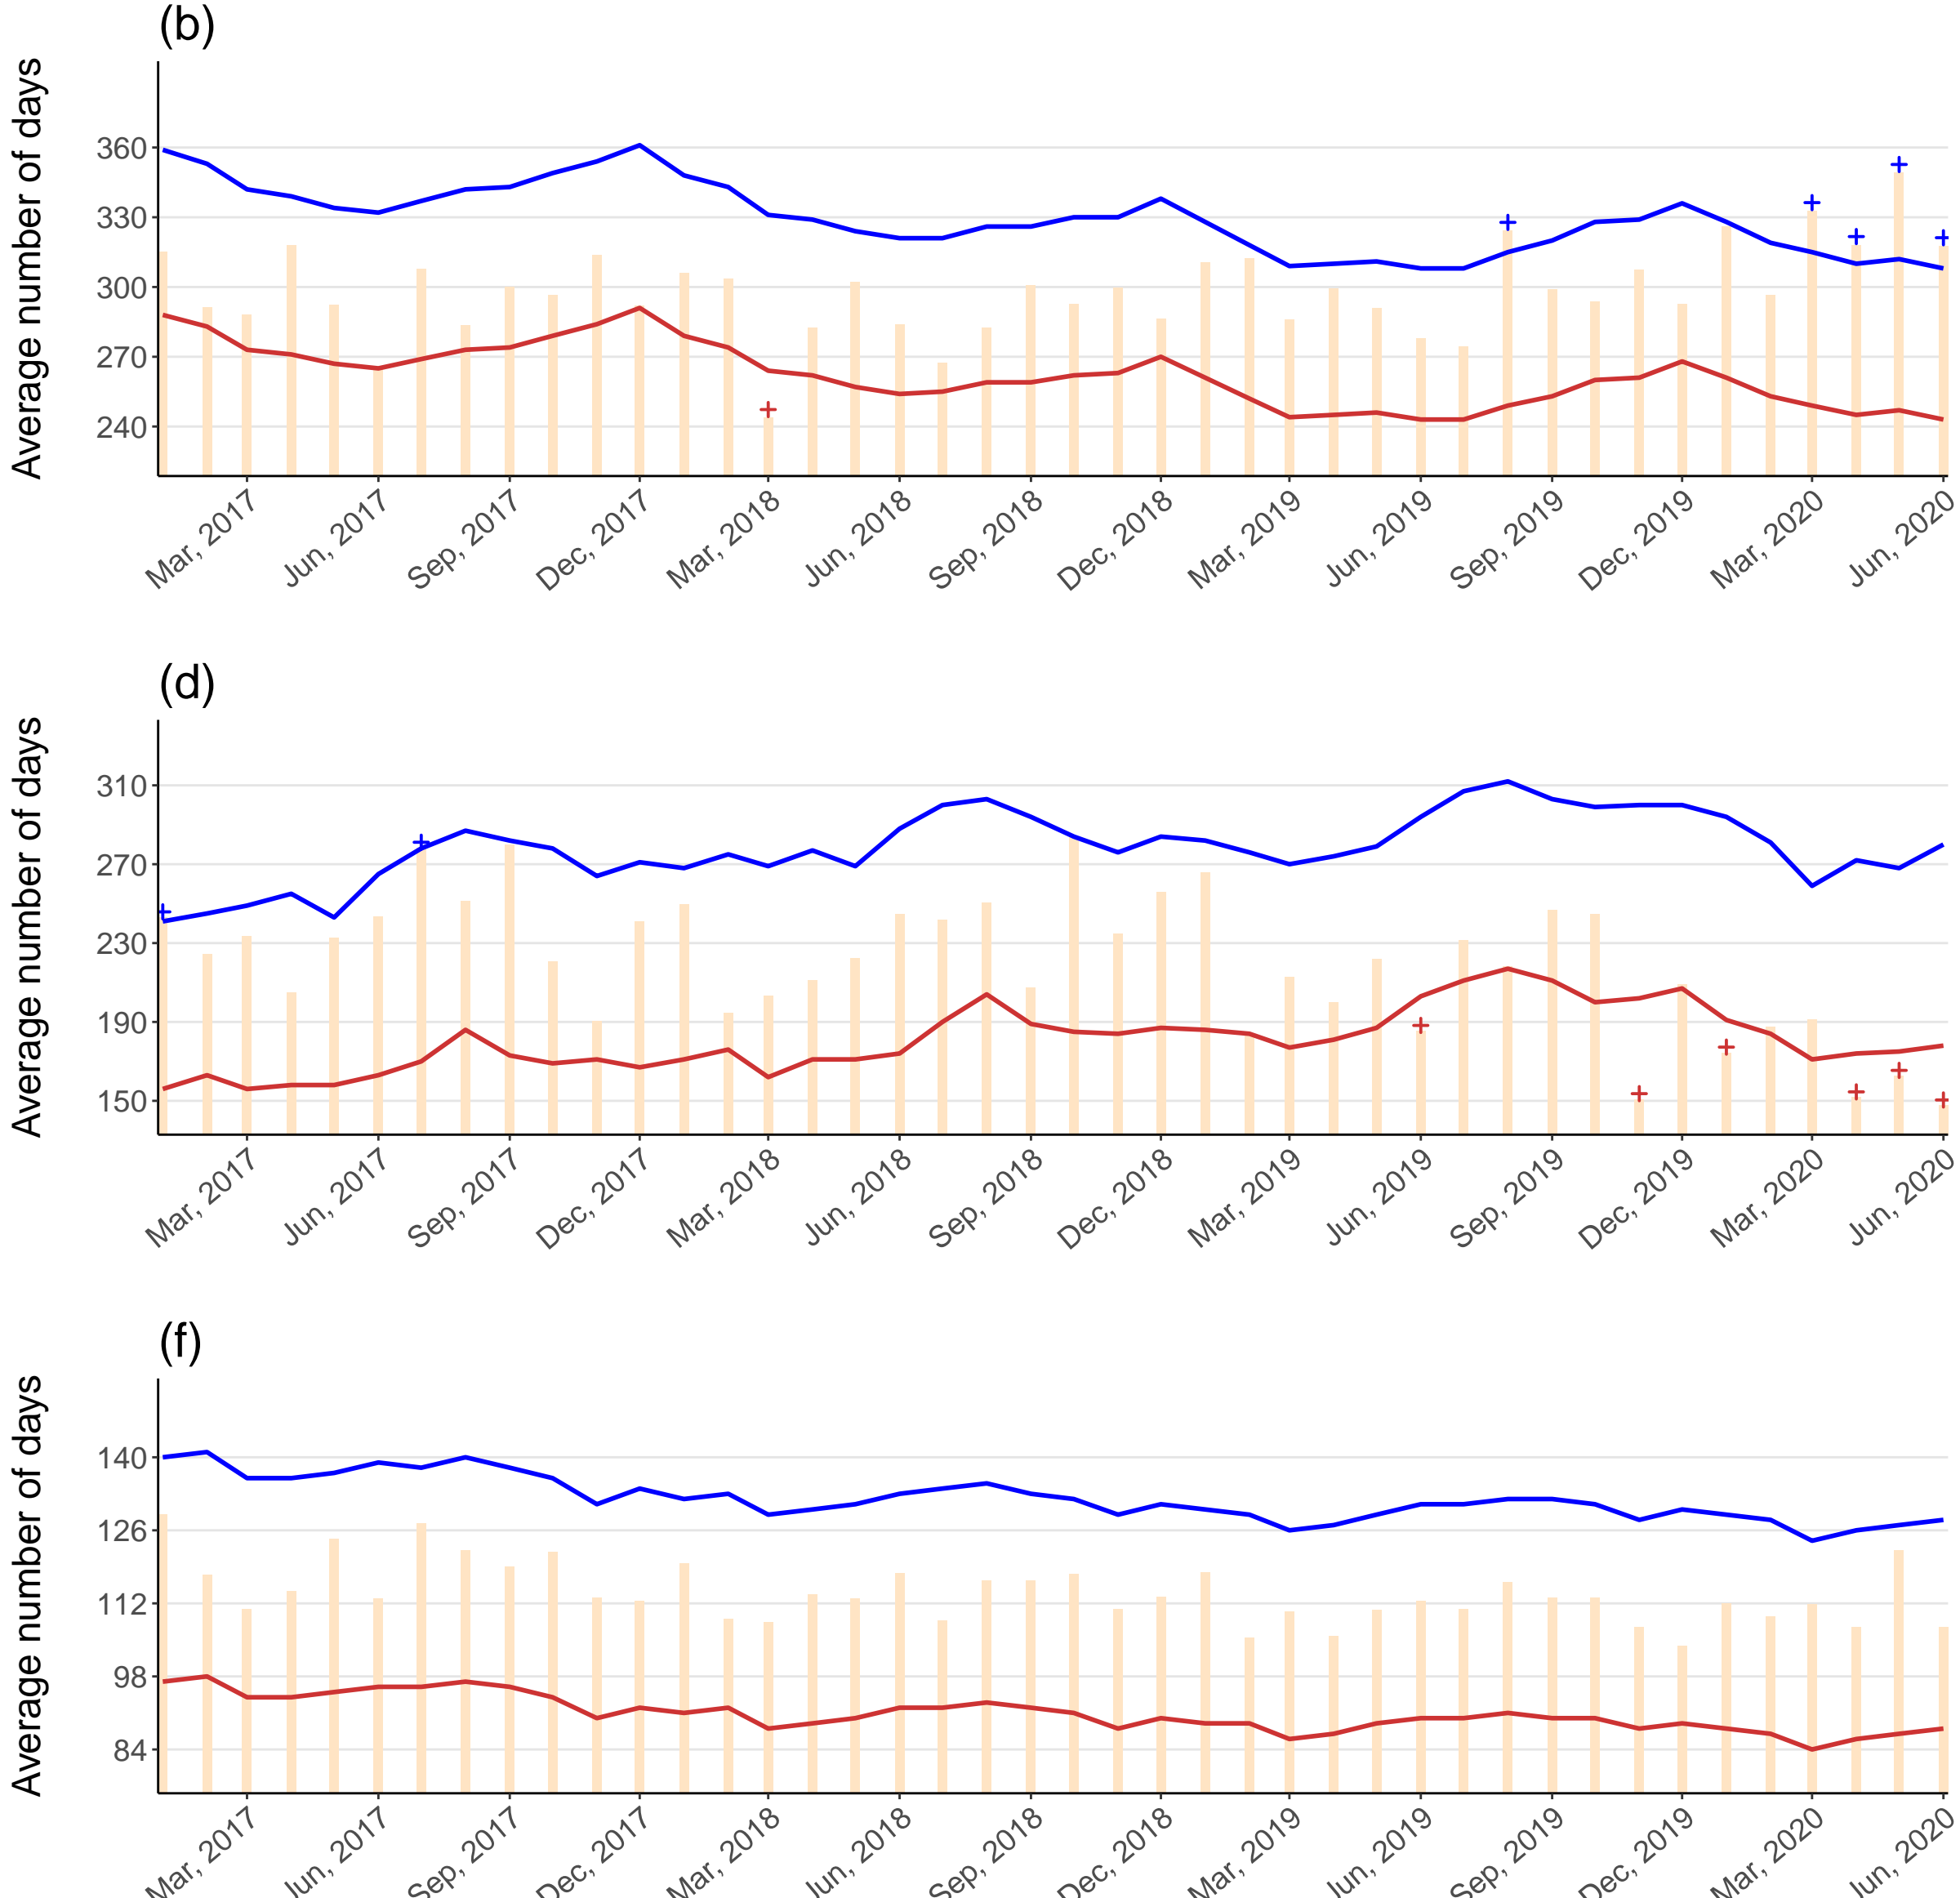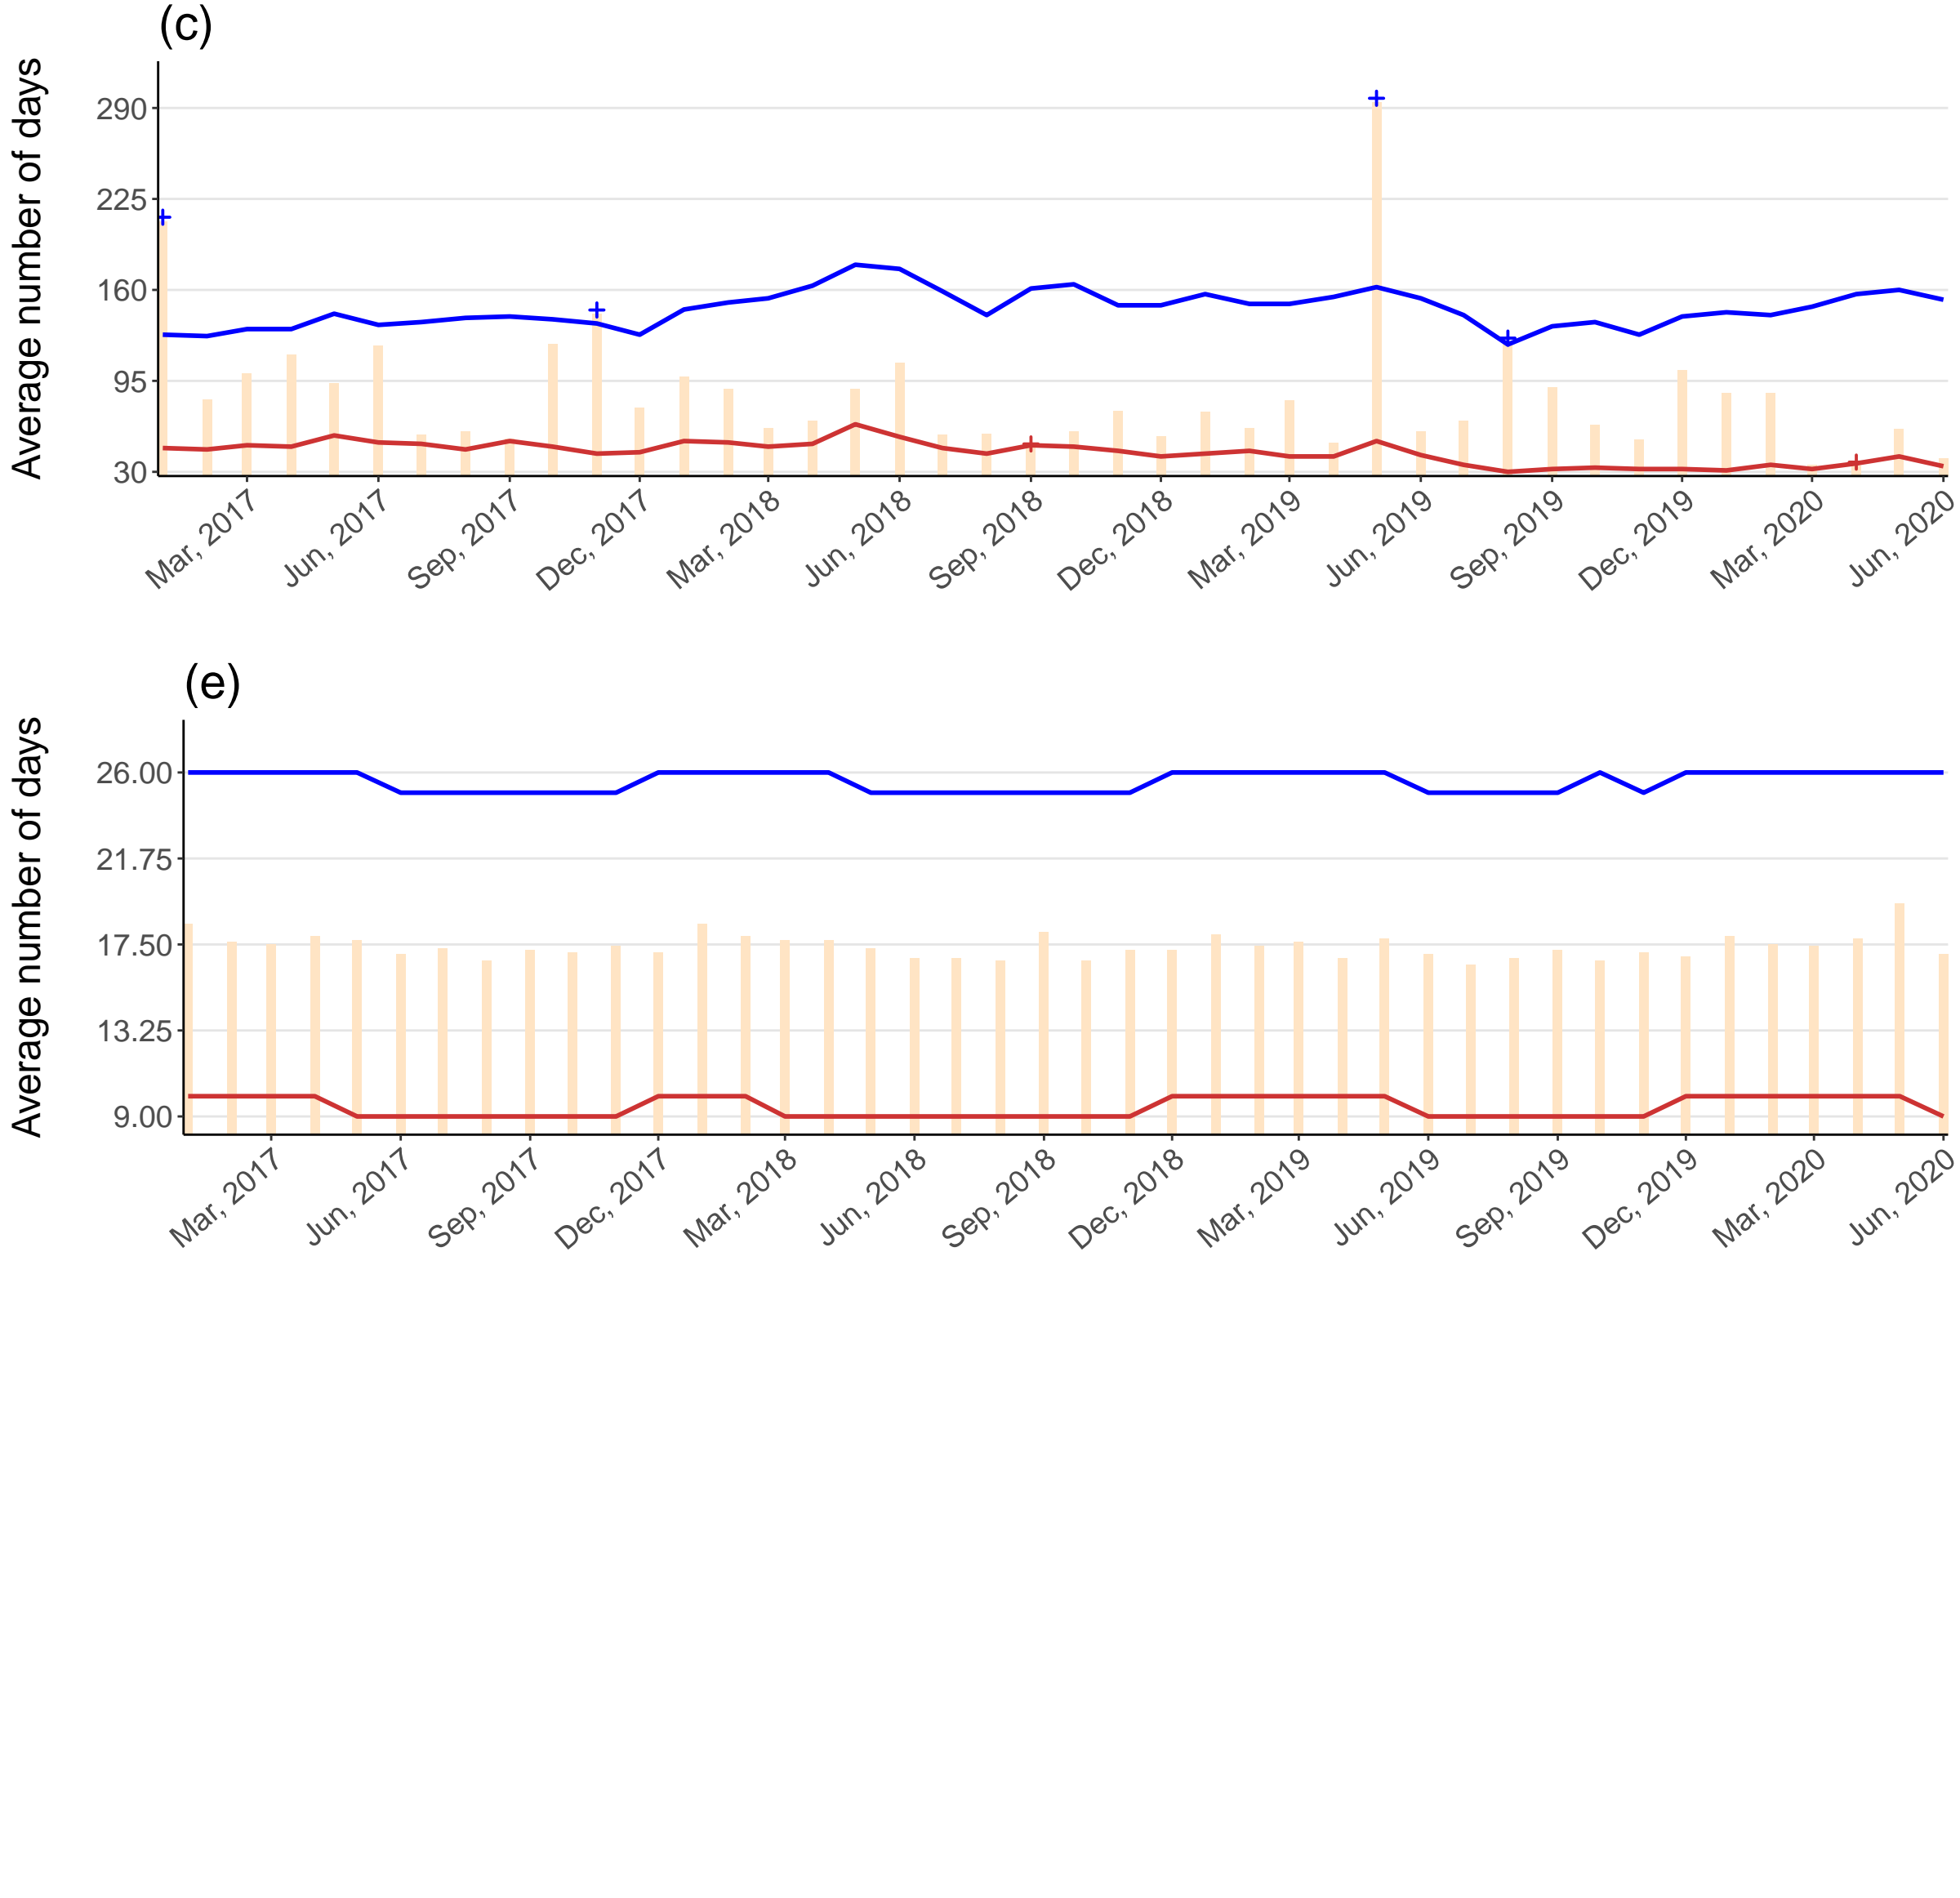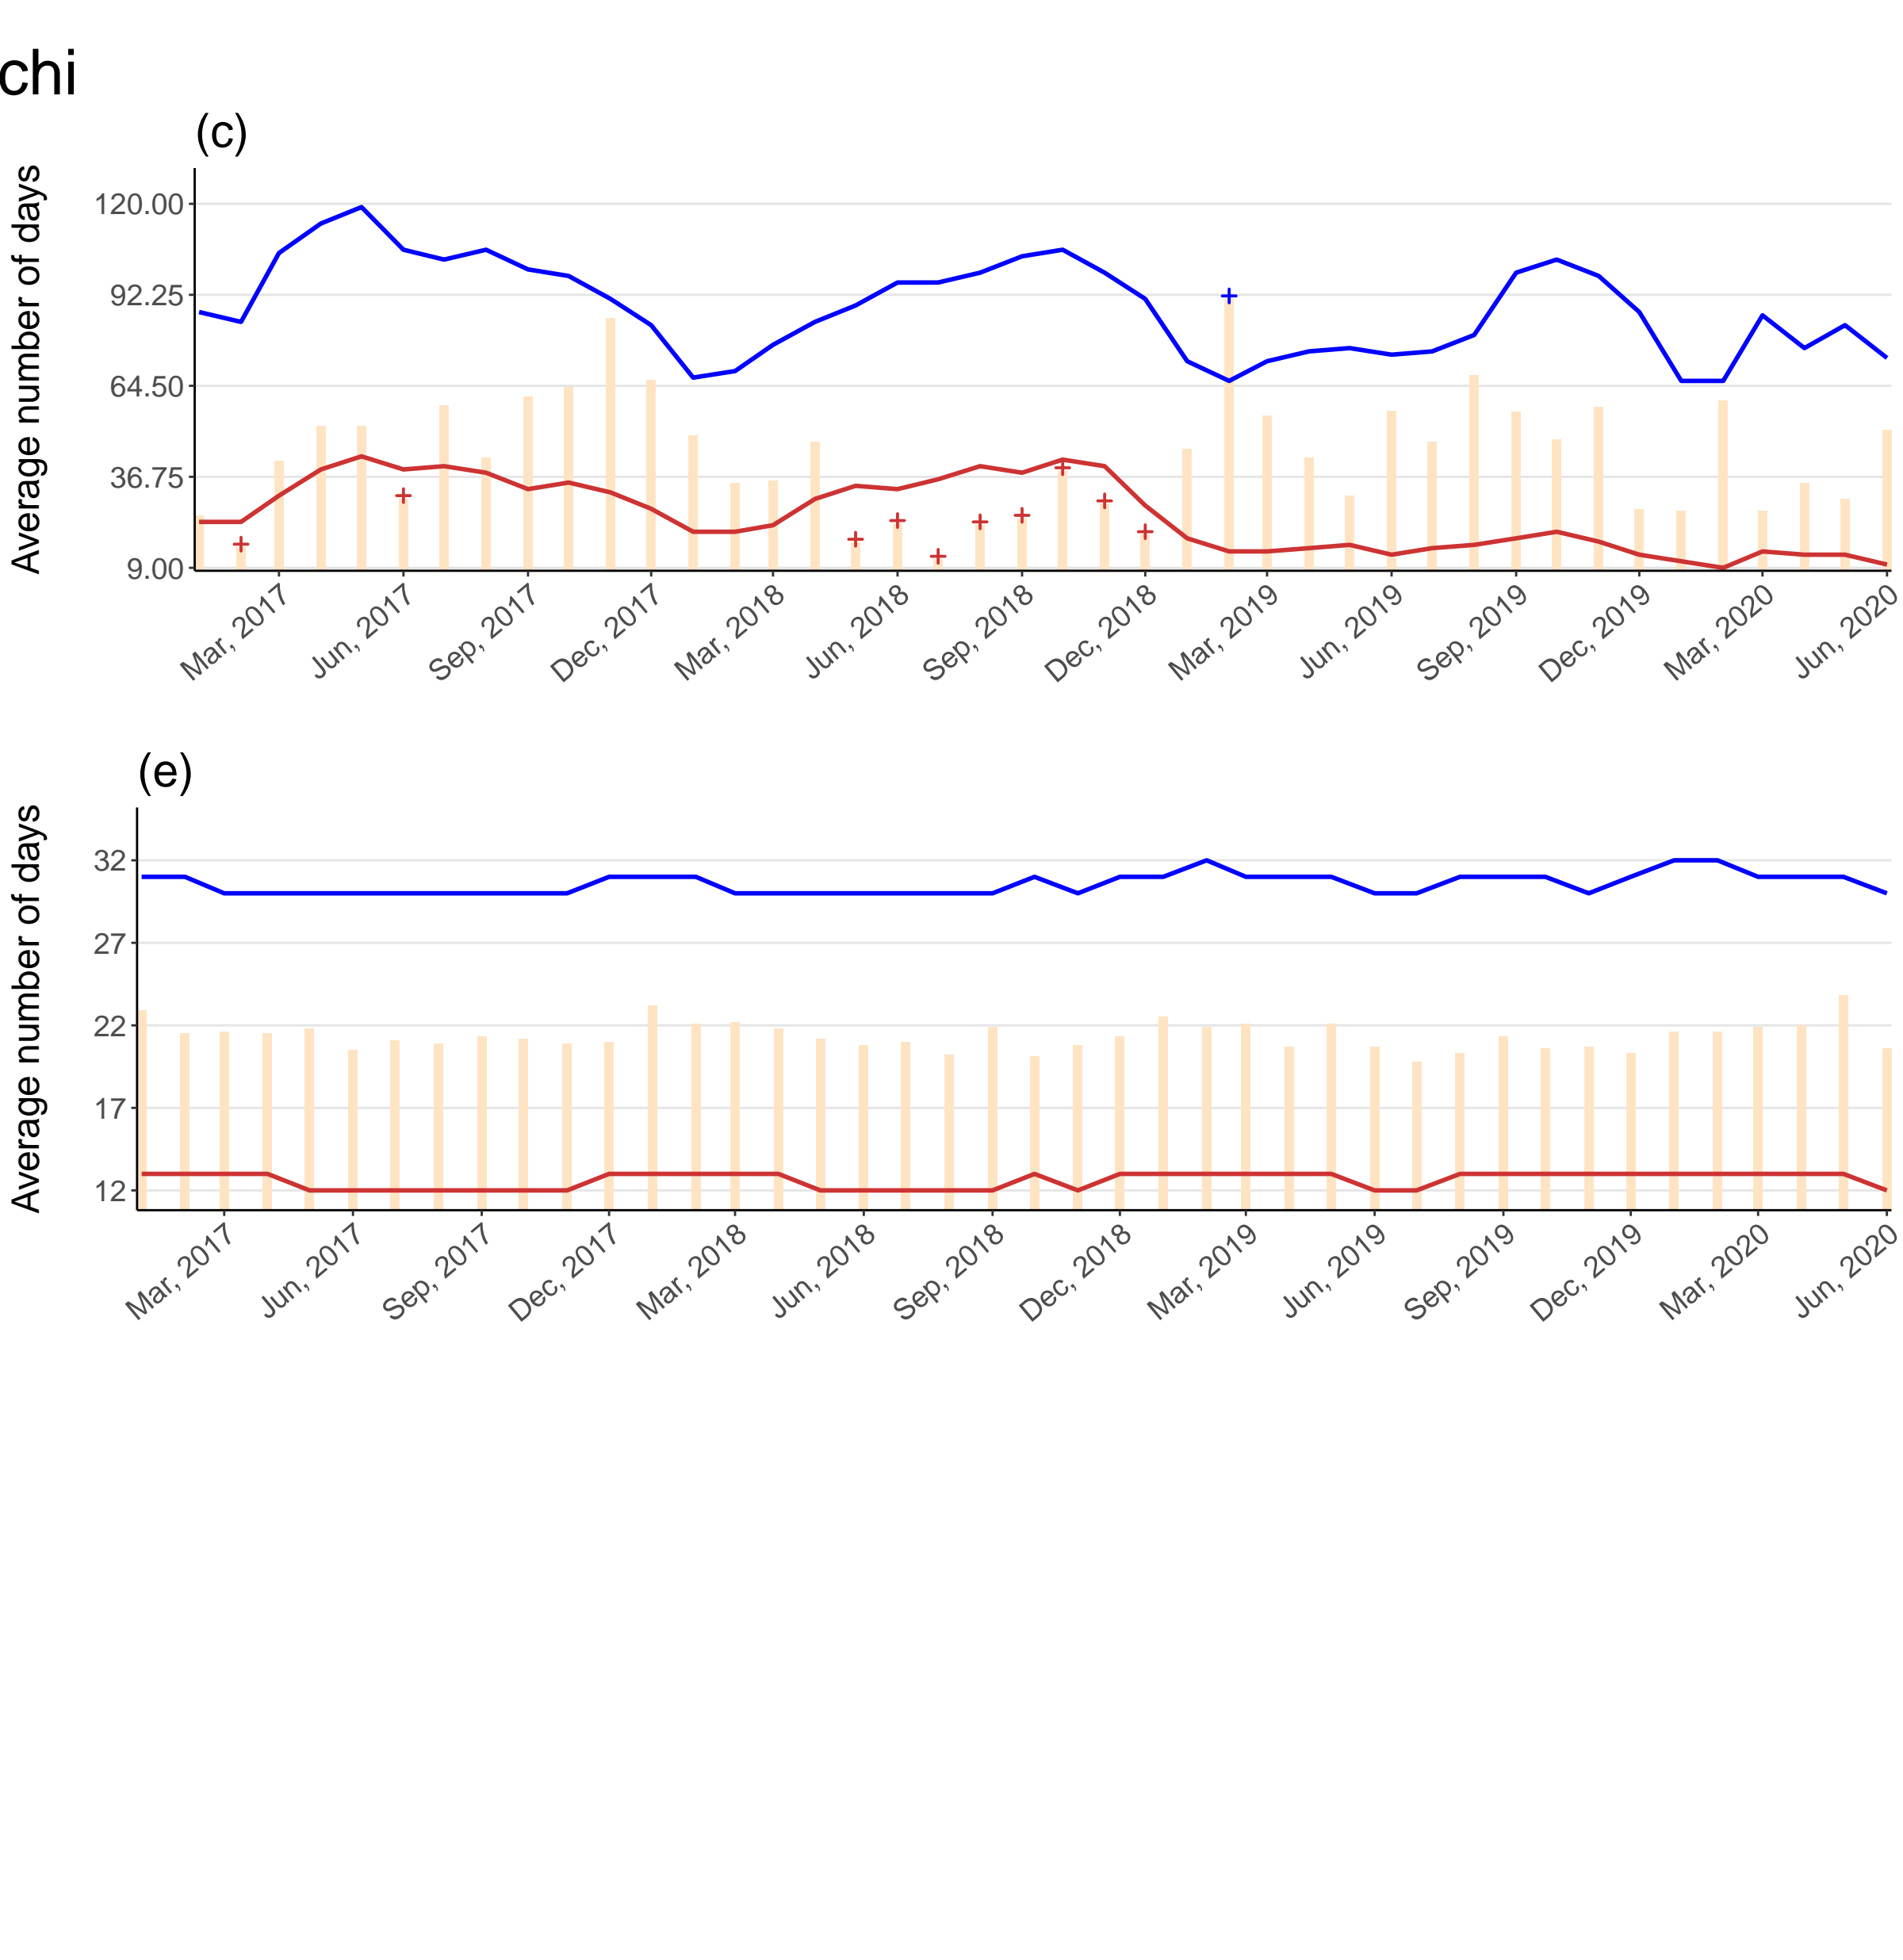

Kochi

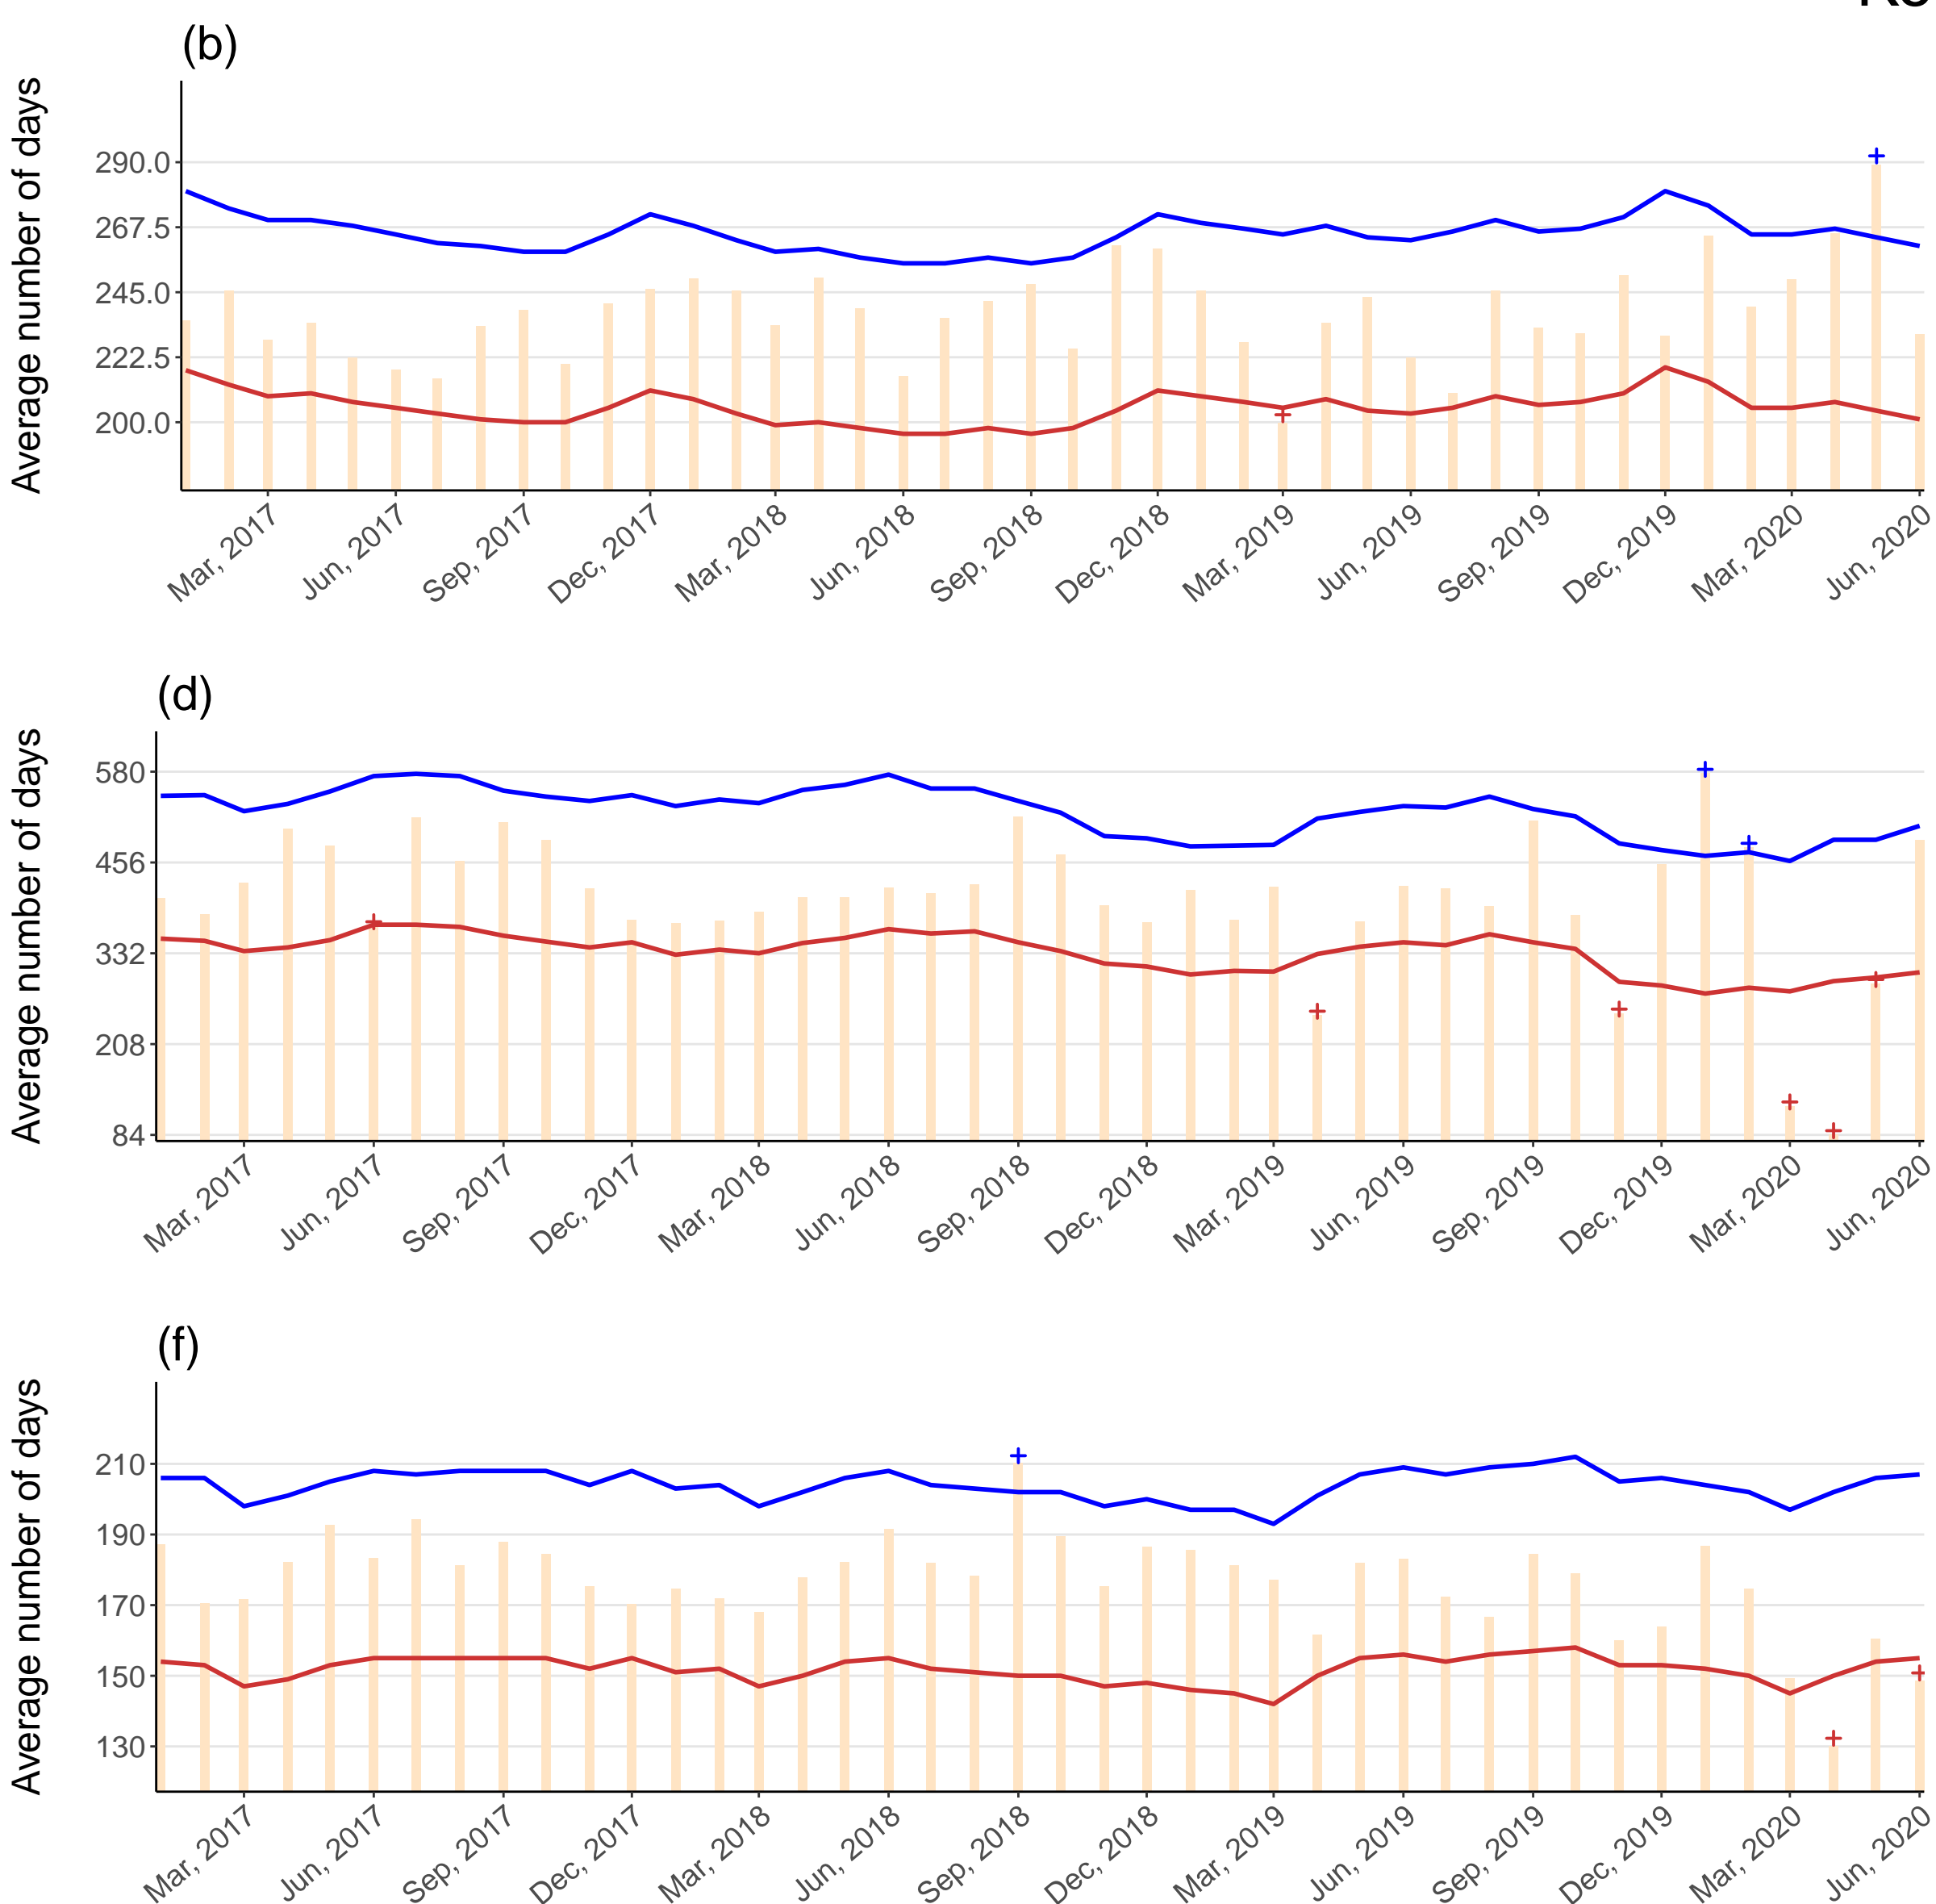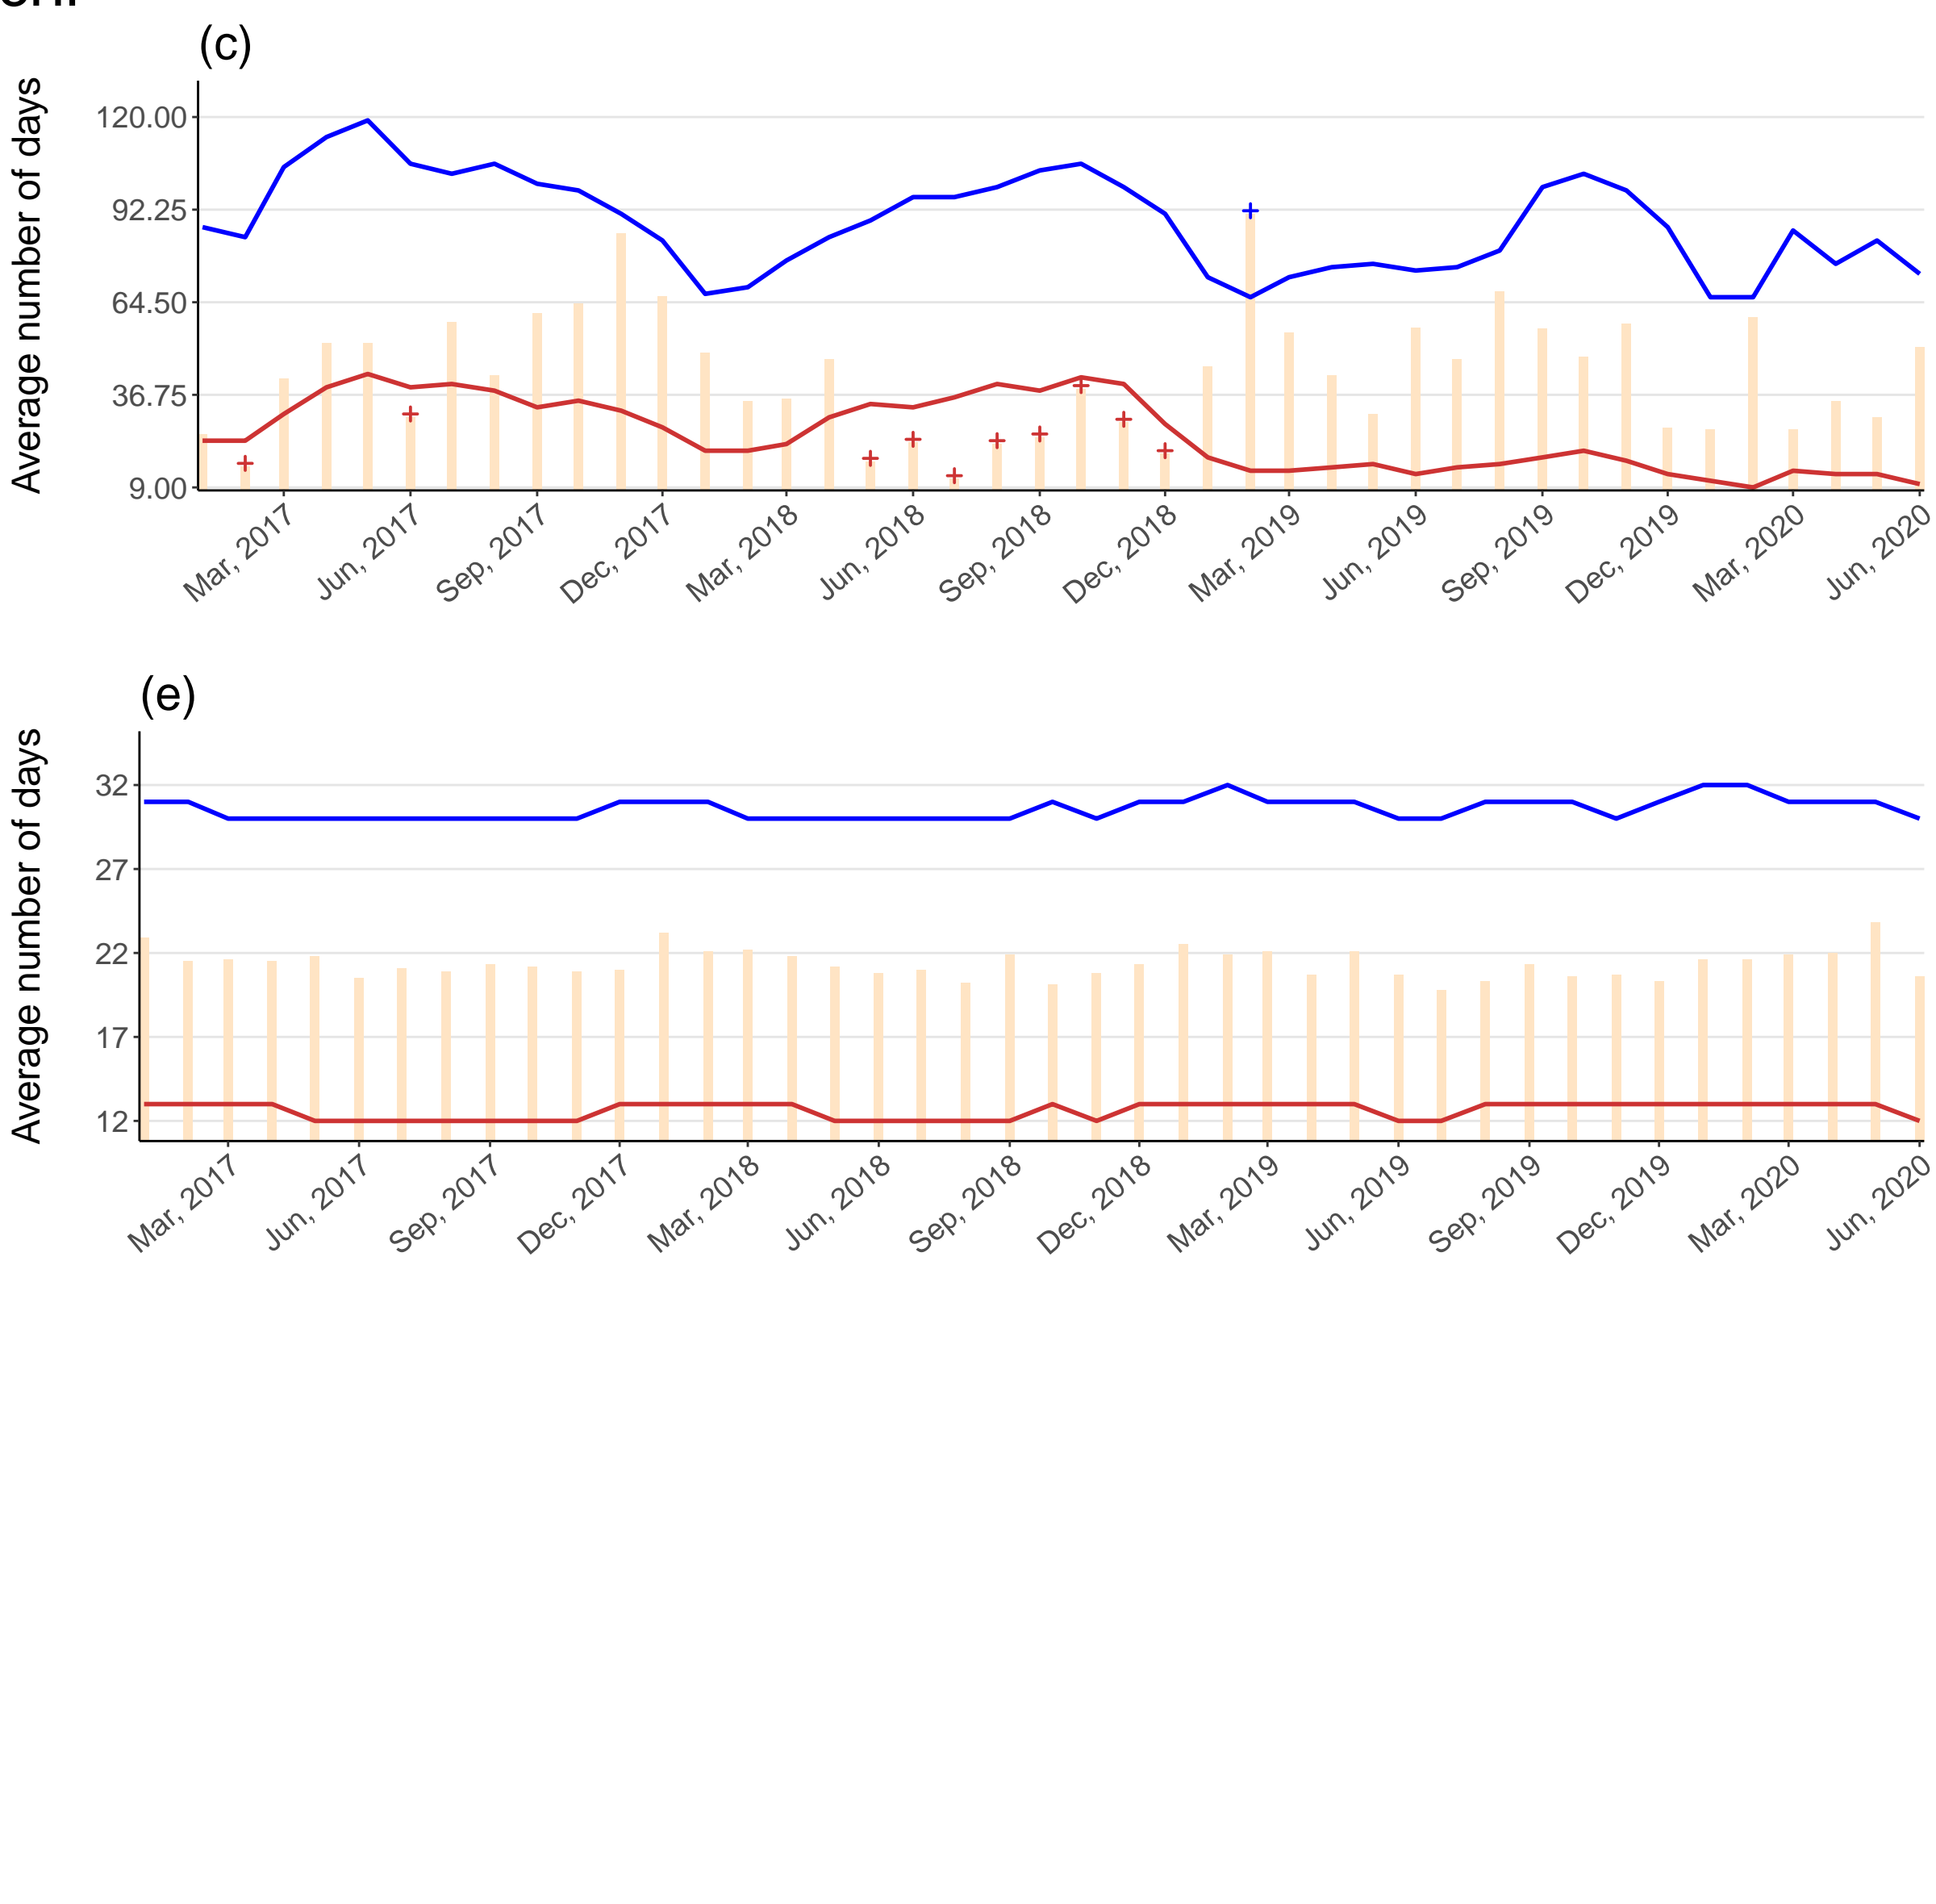

# Fukuoka

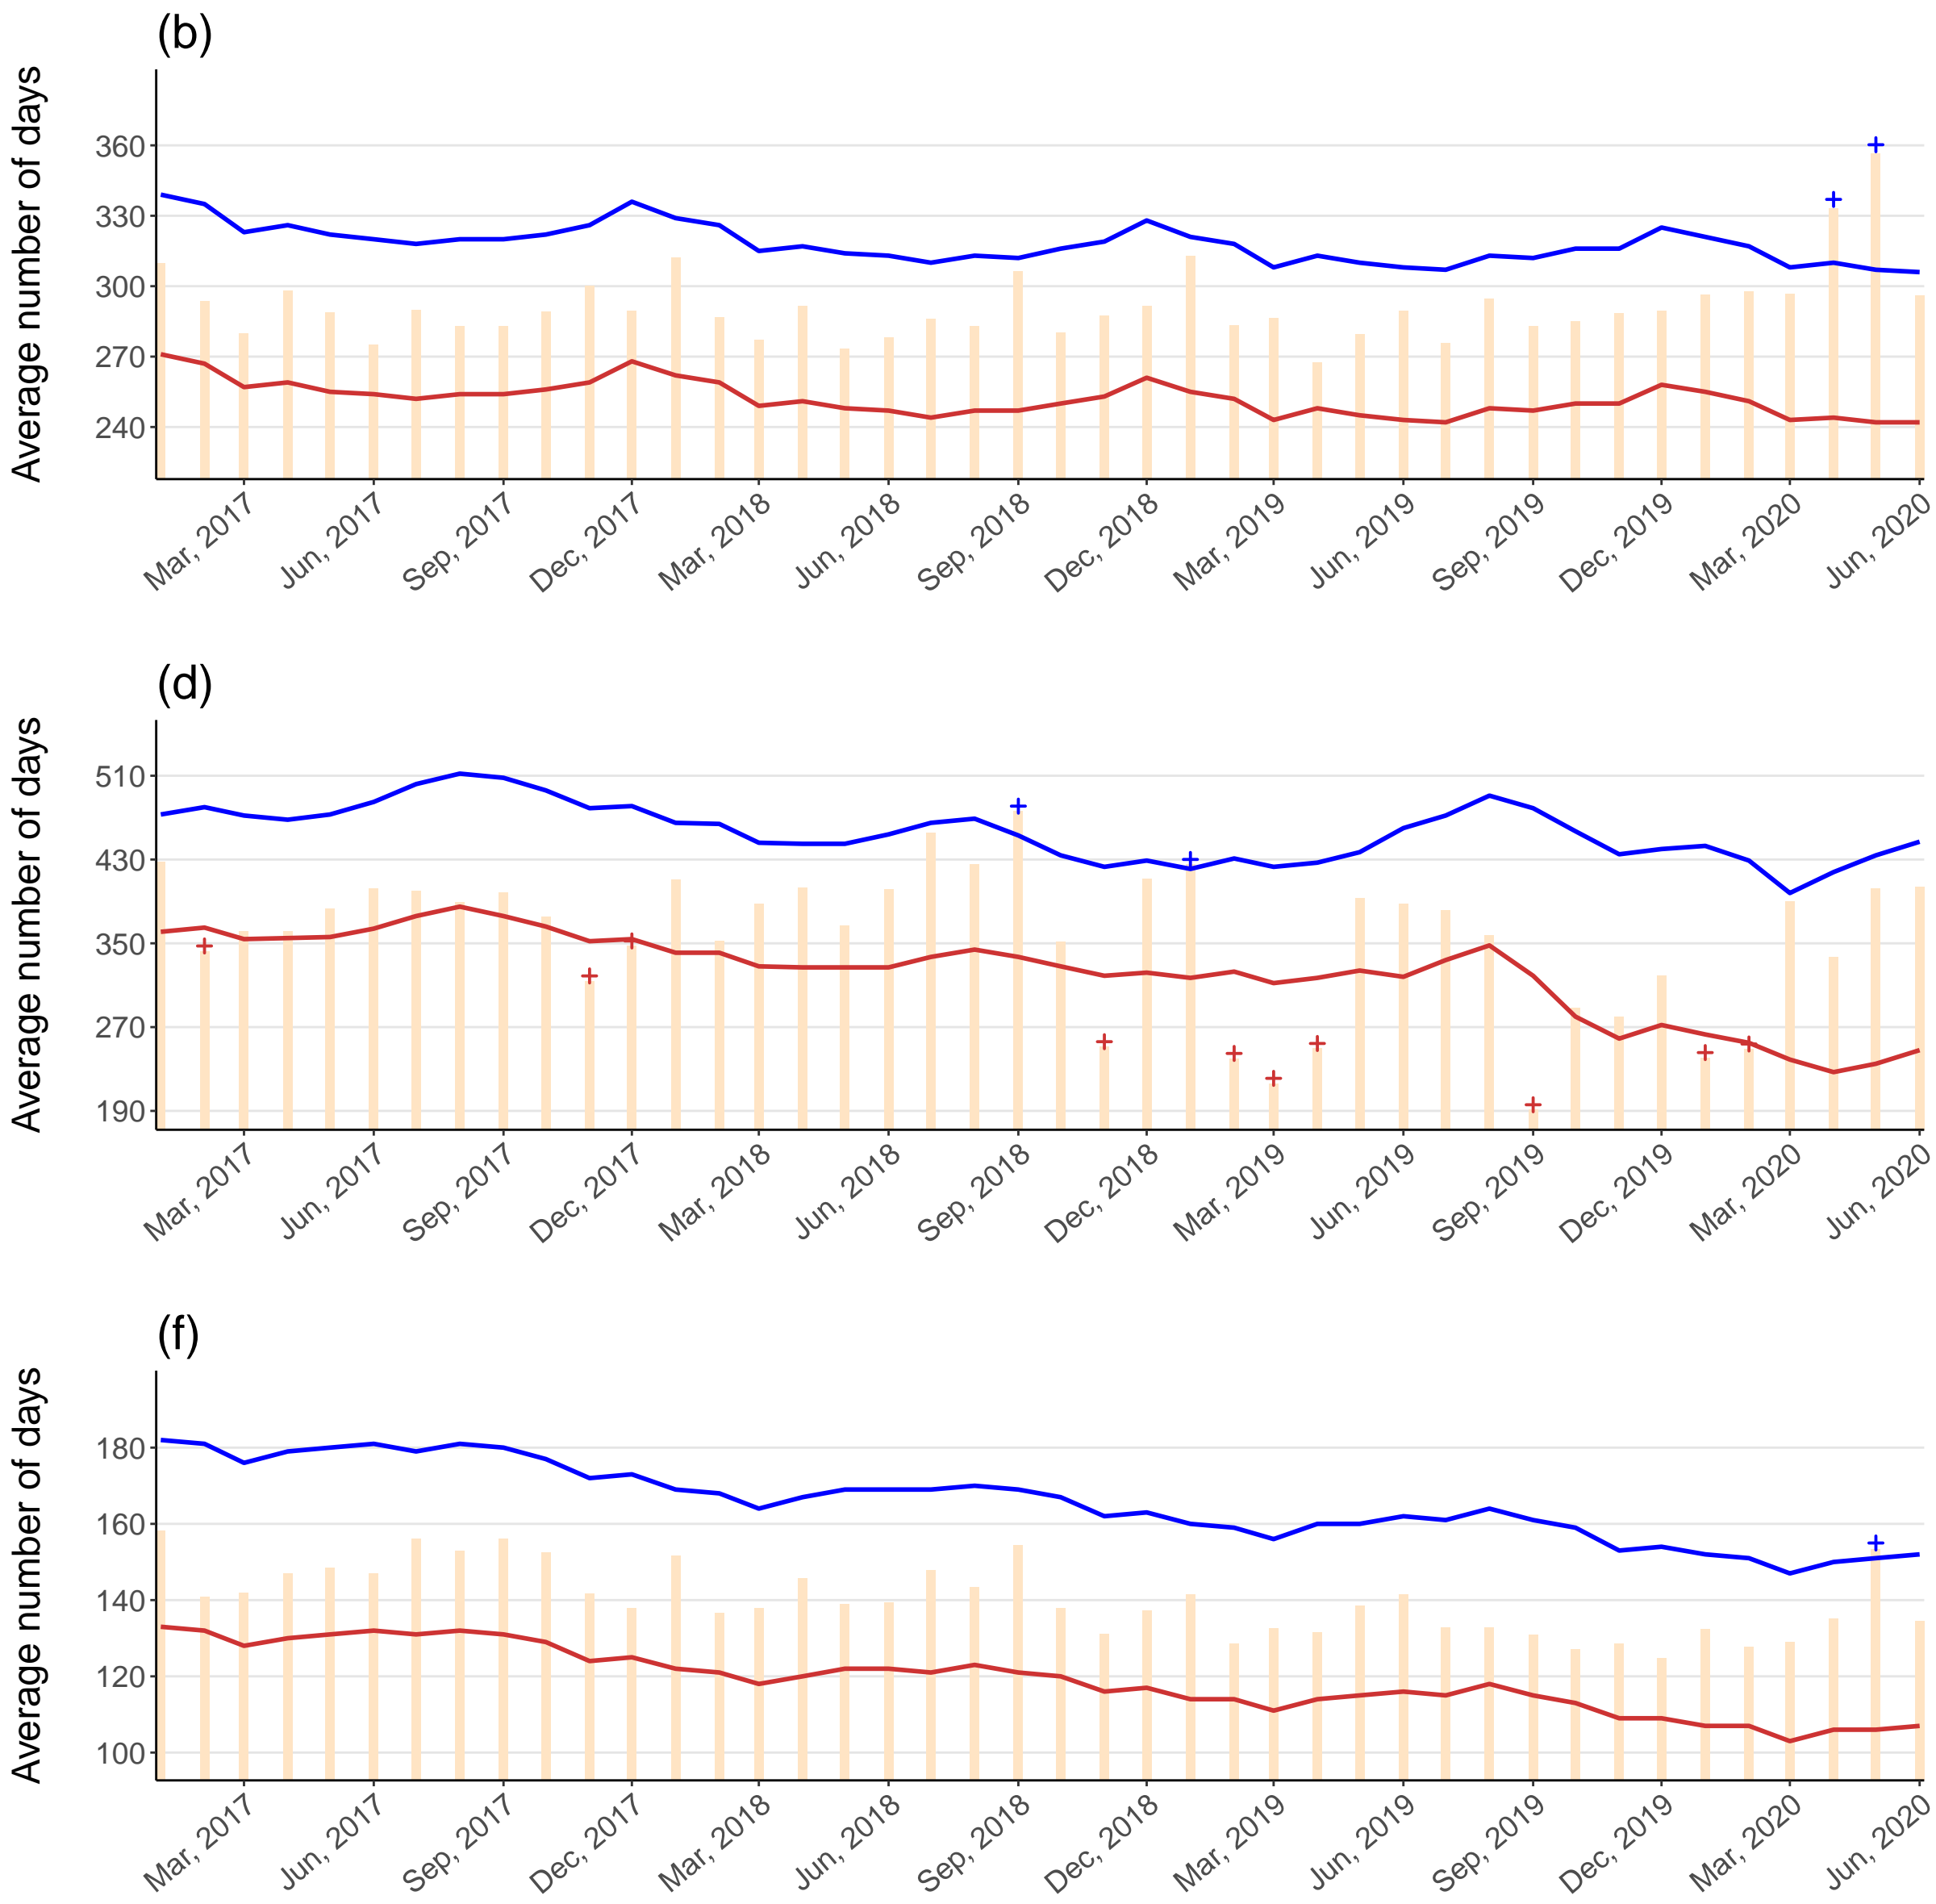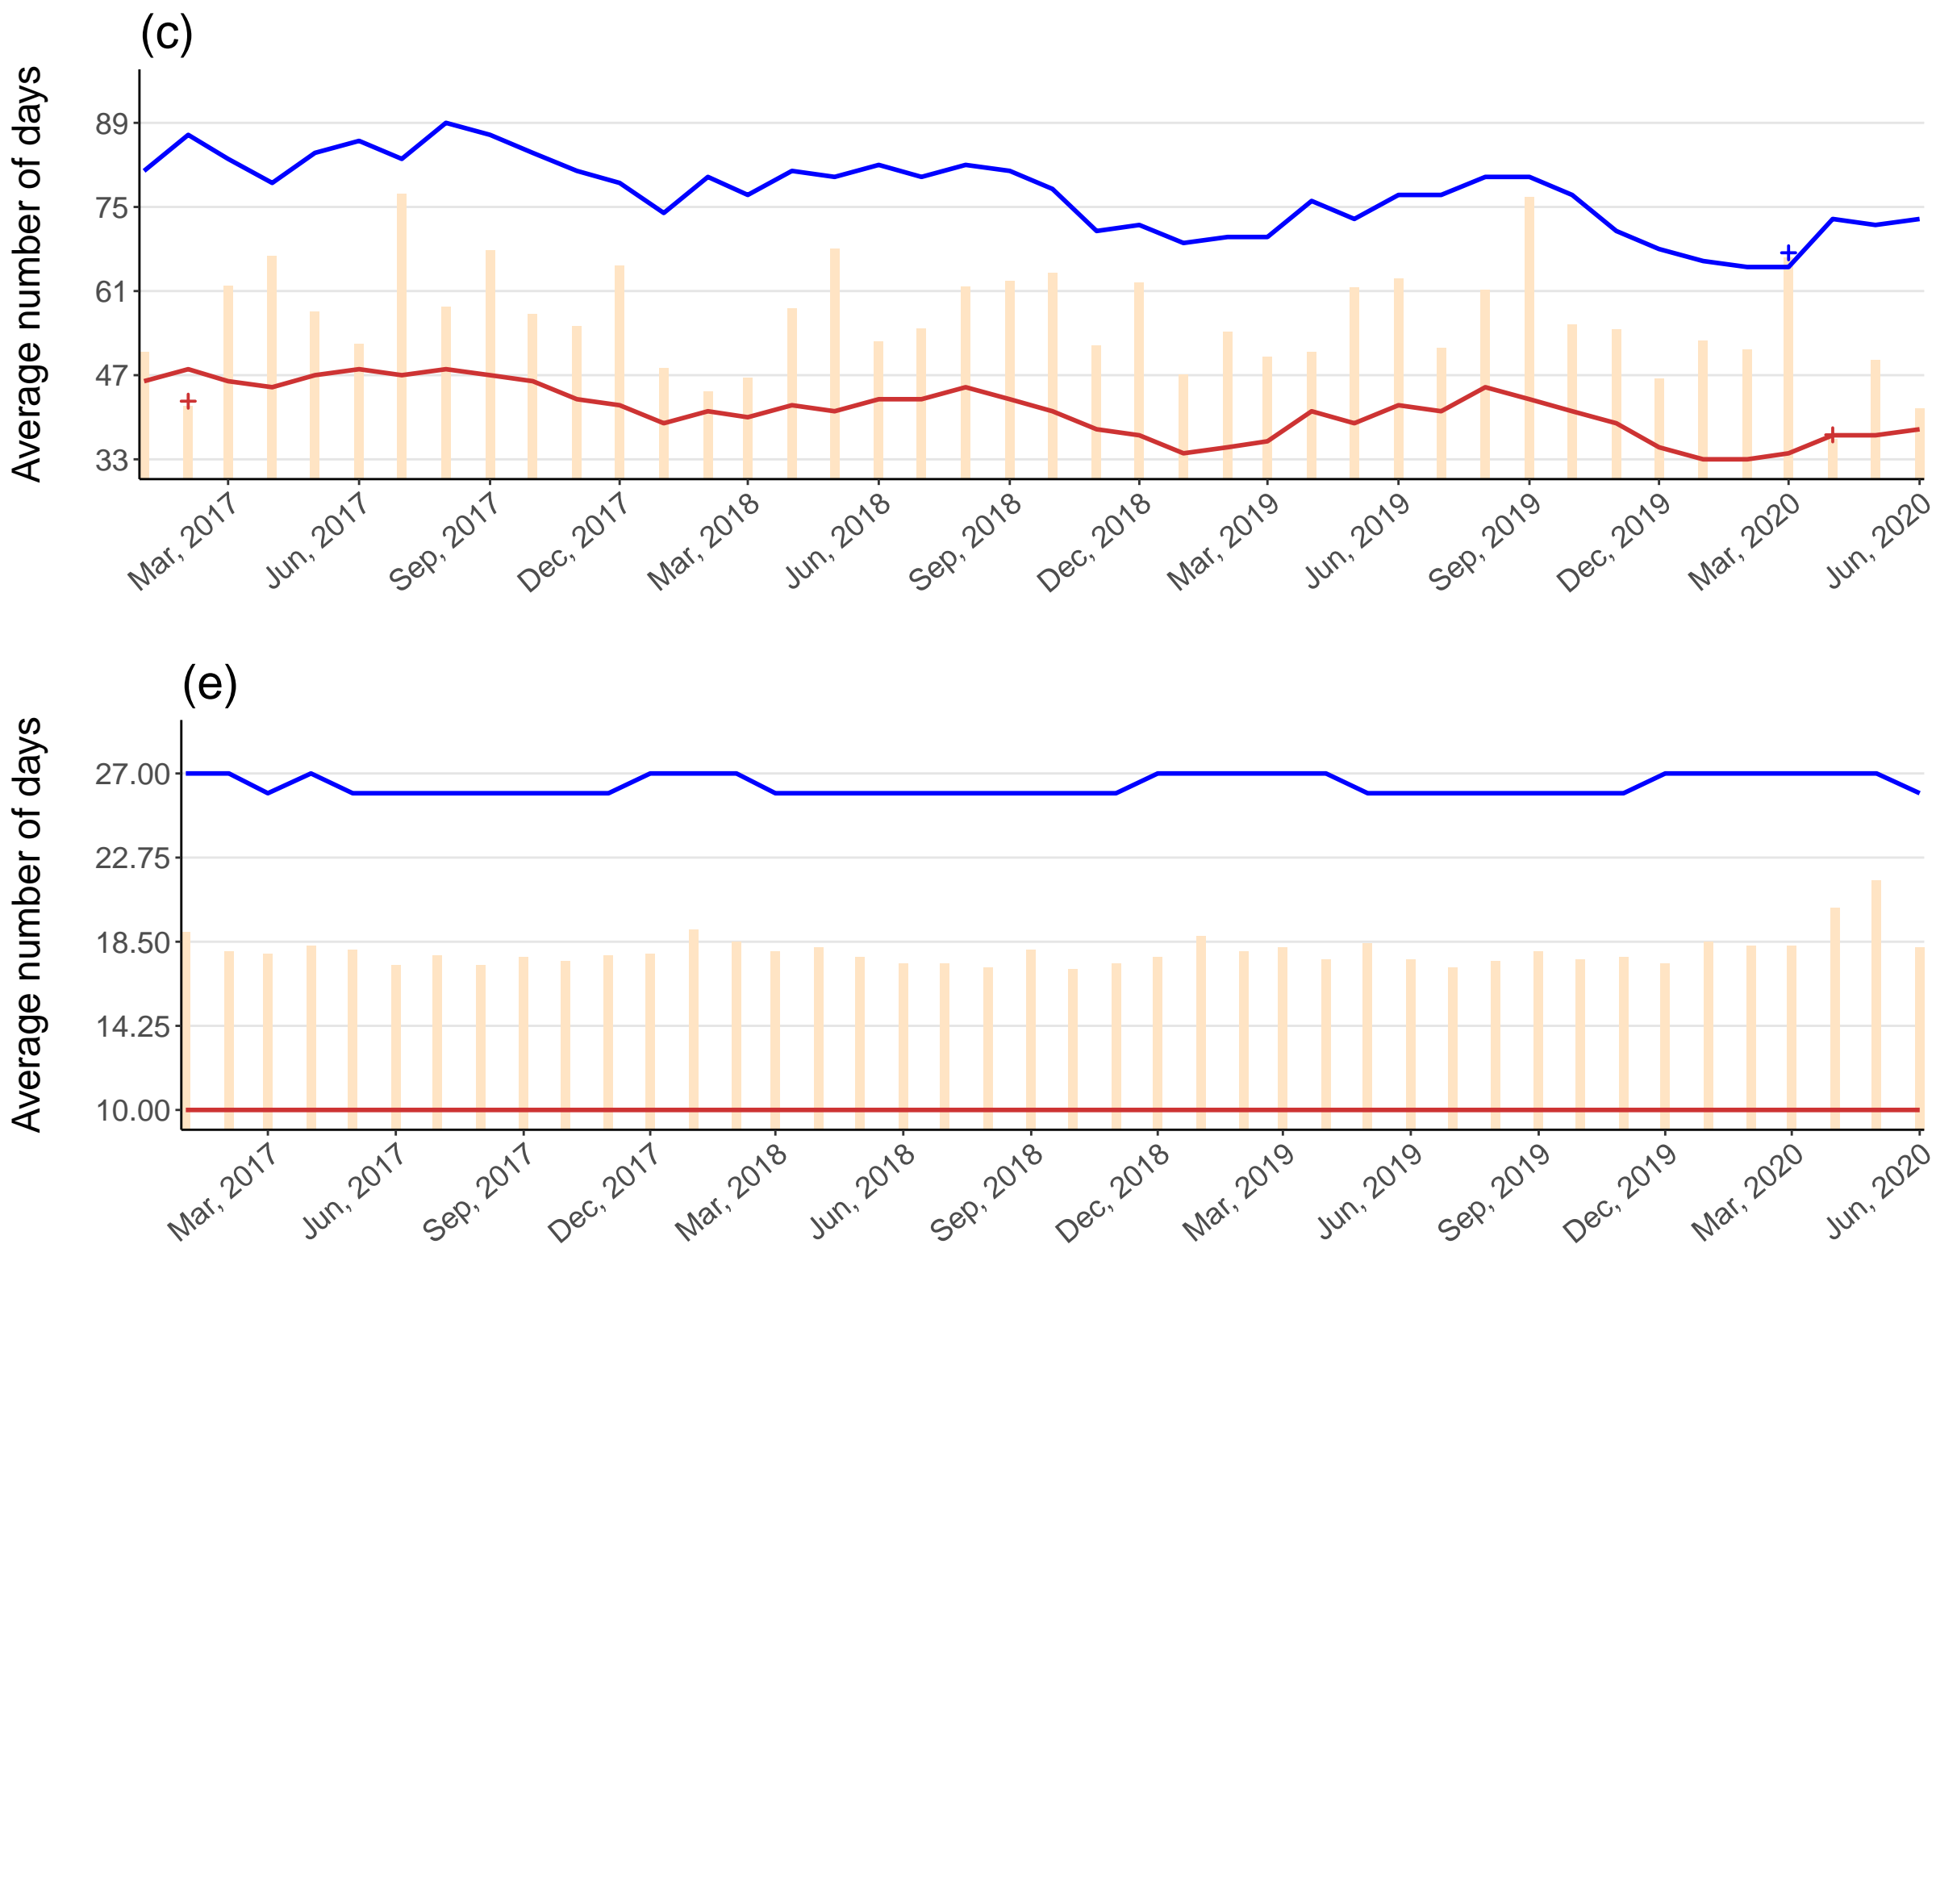

# Saga

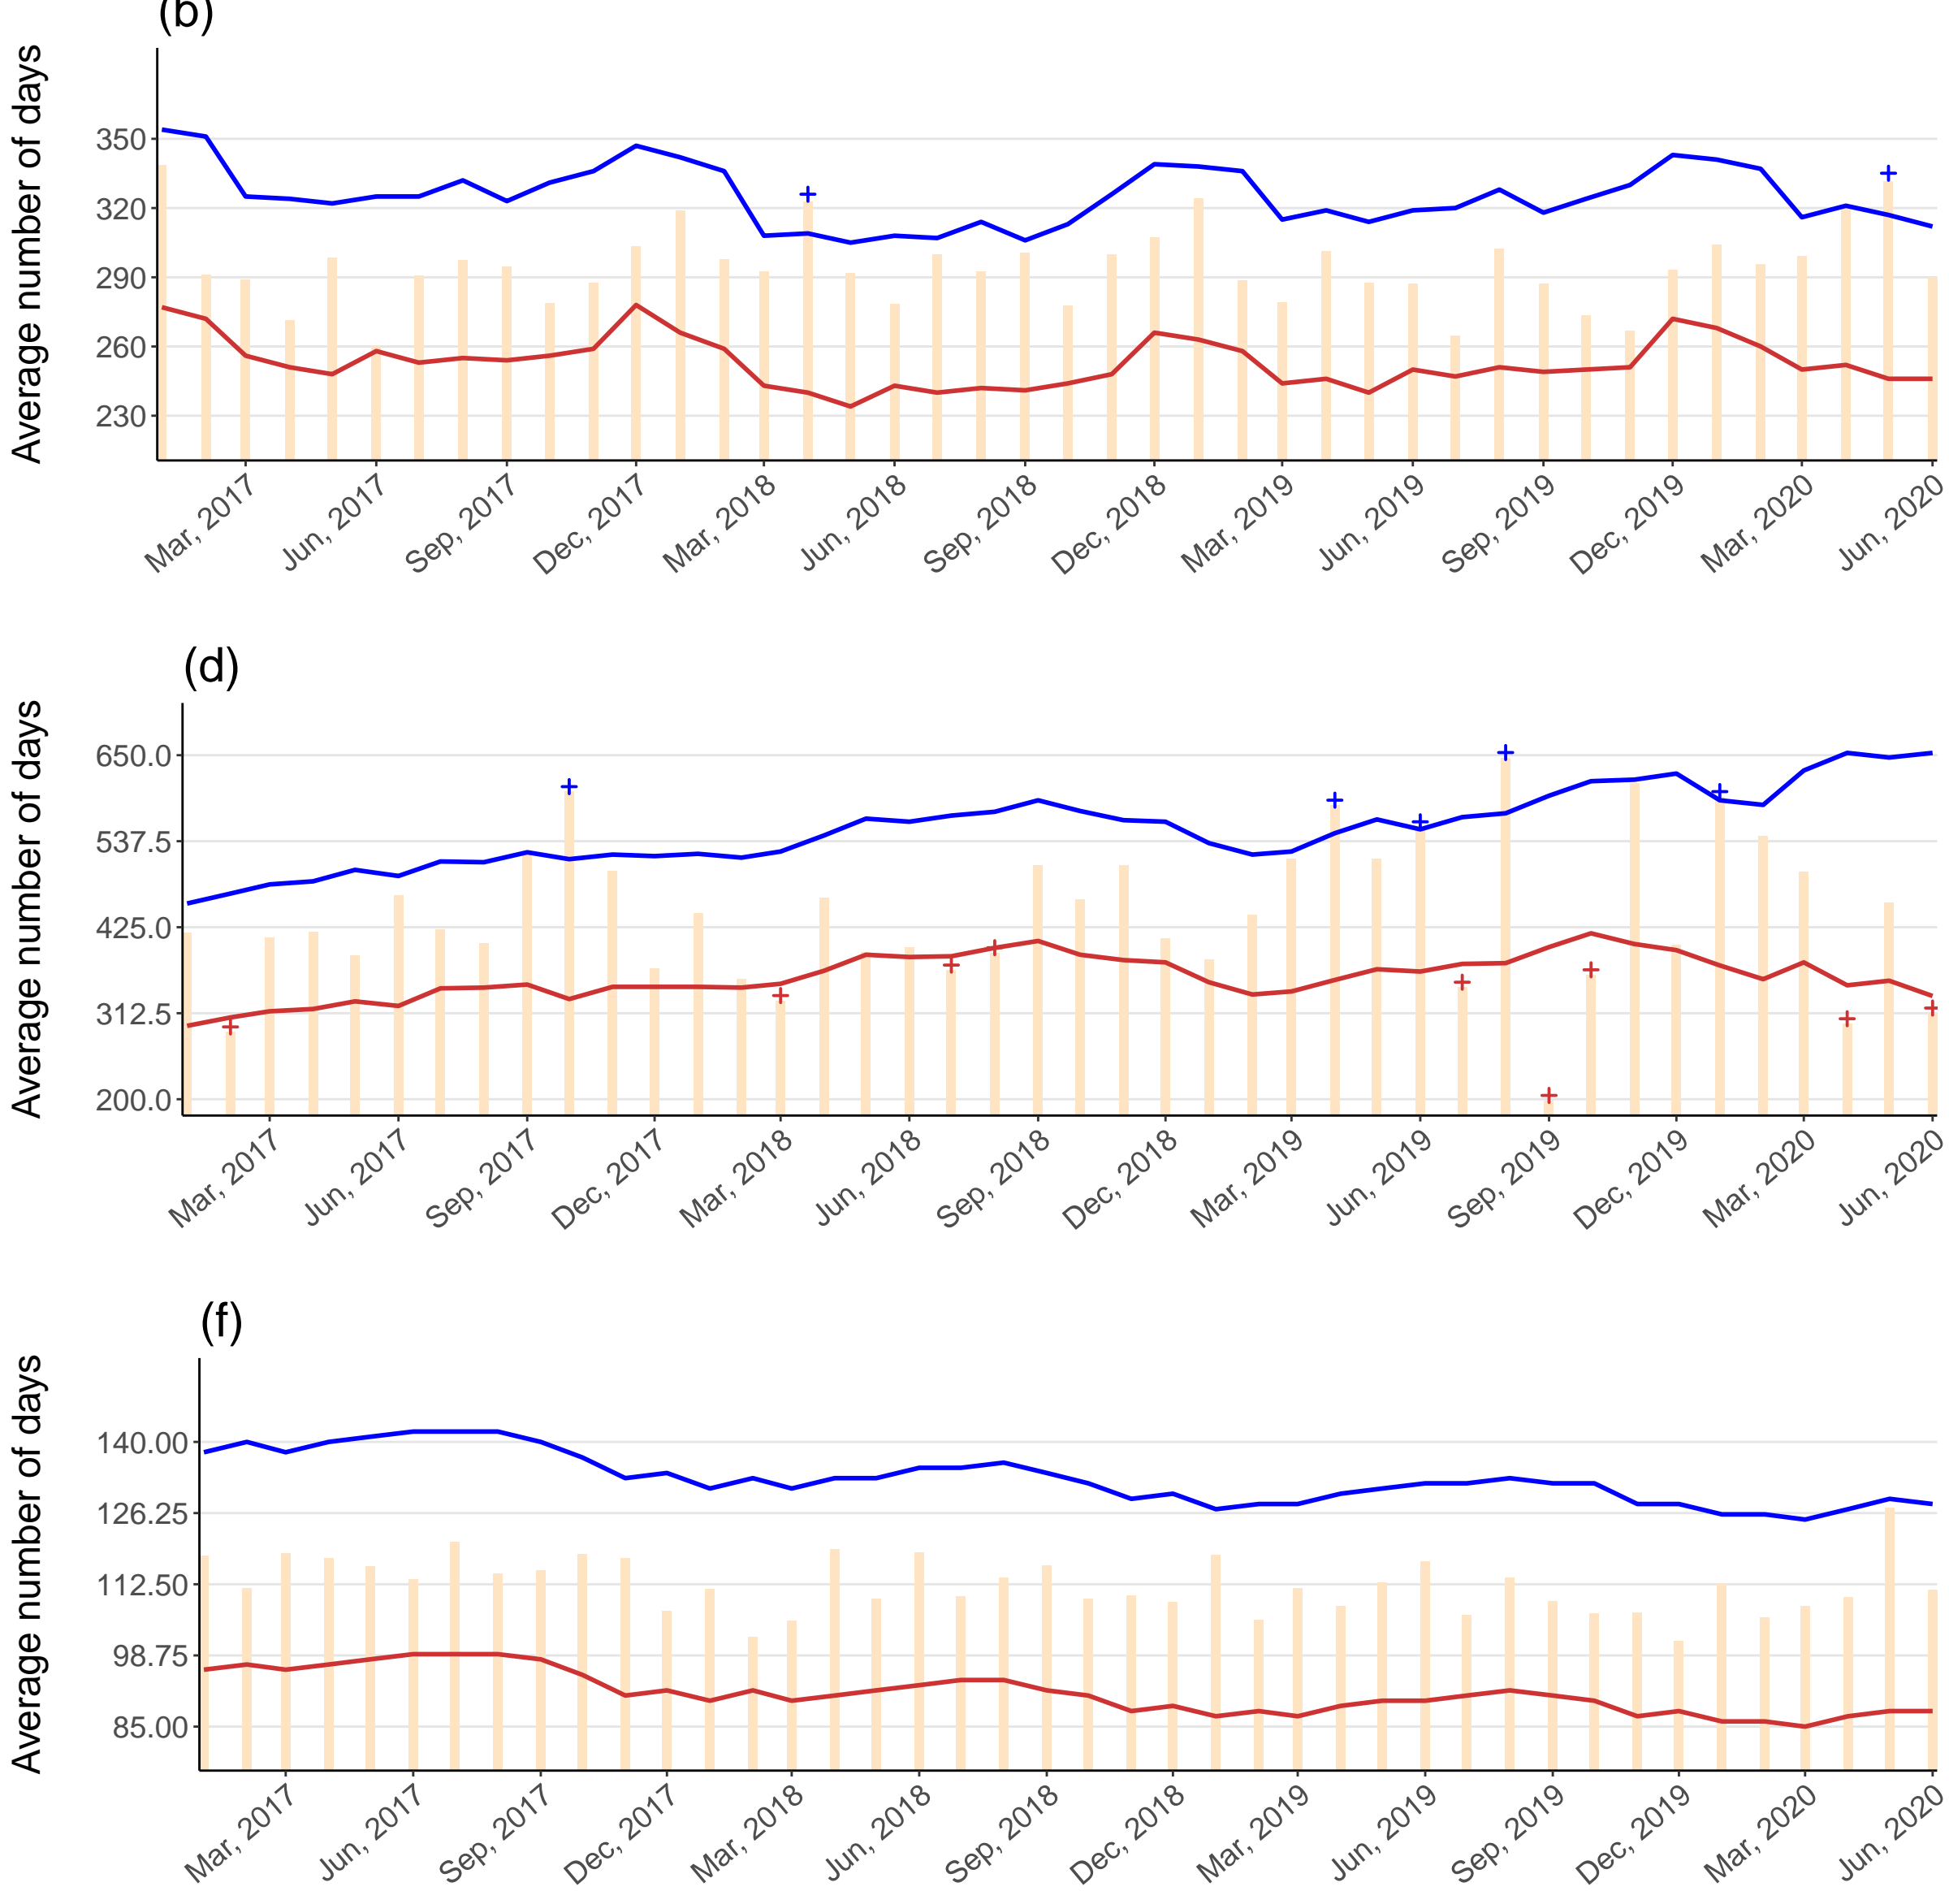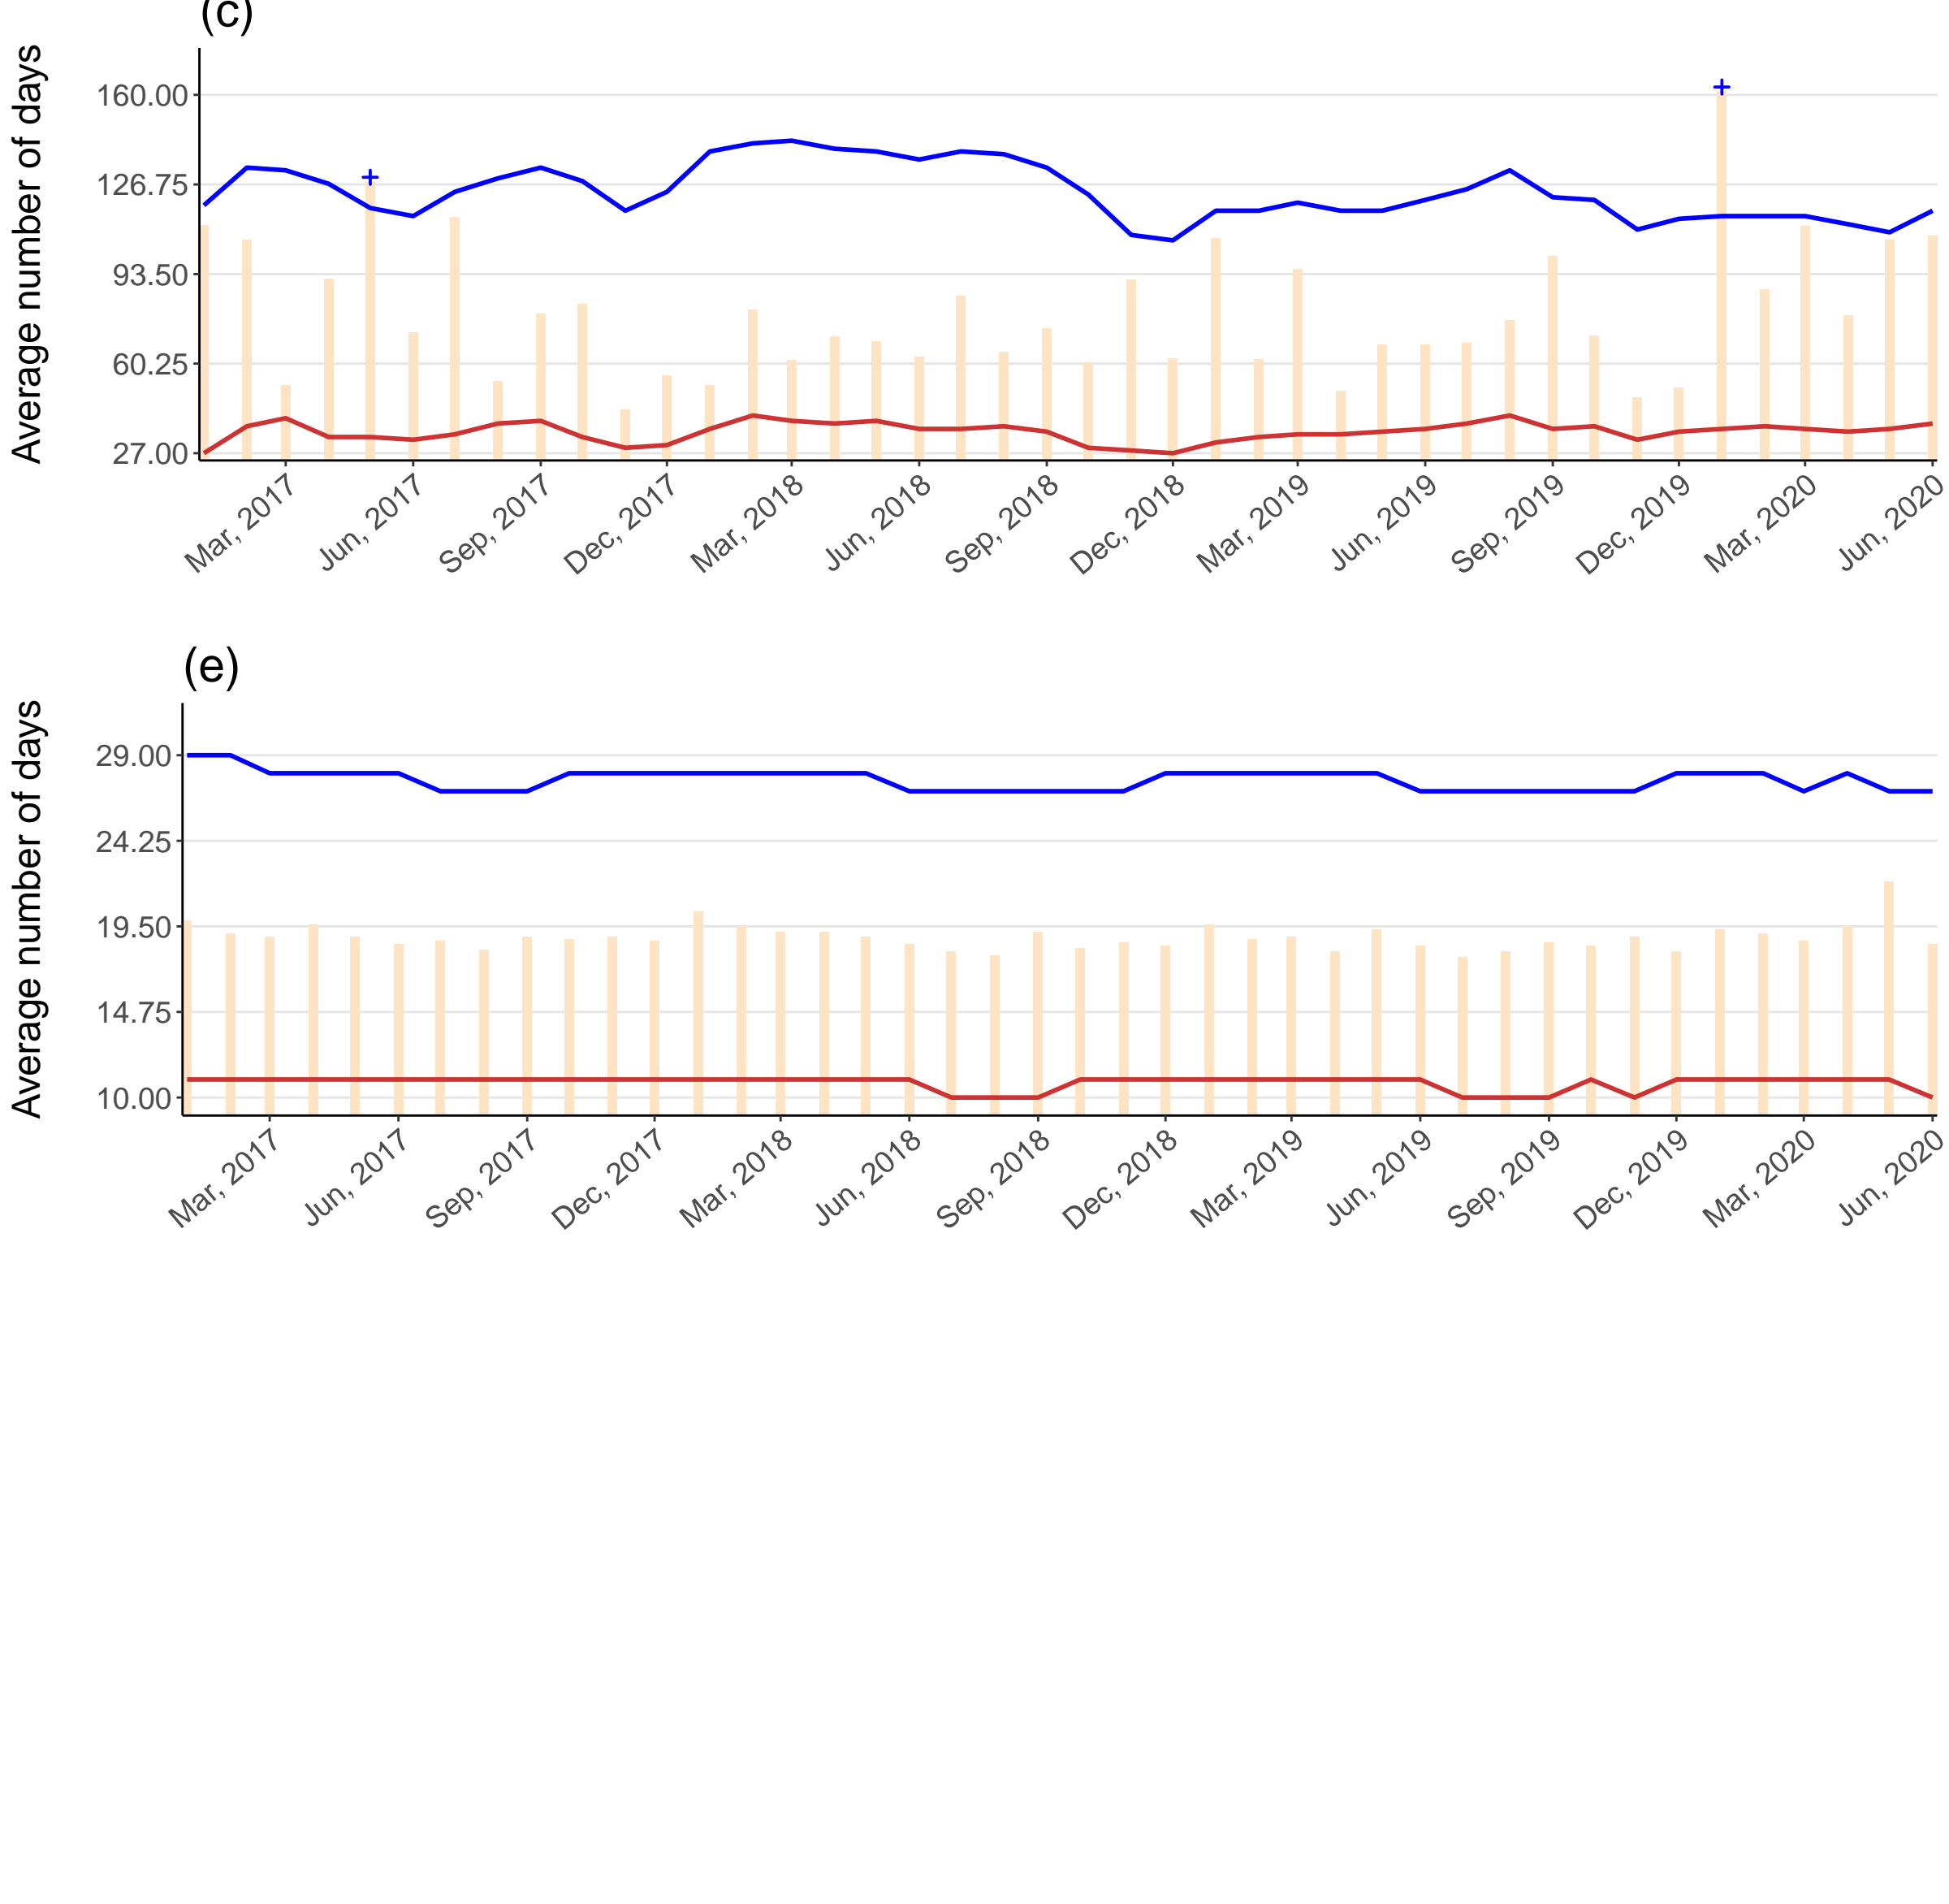

# Nagasaki

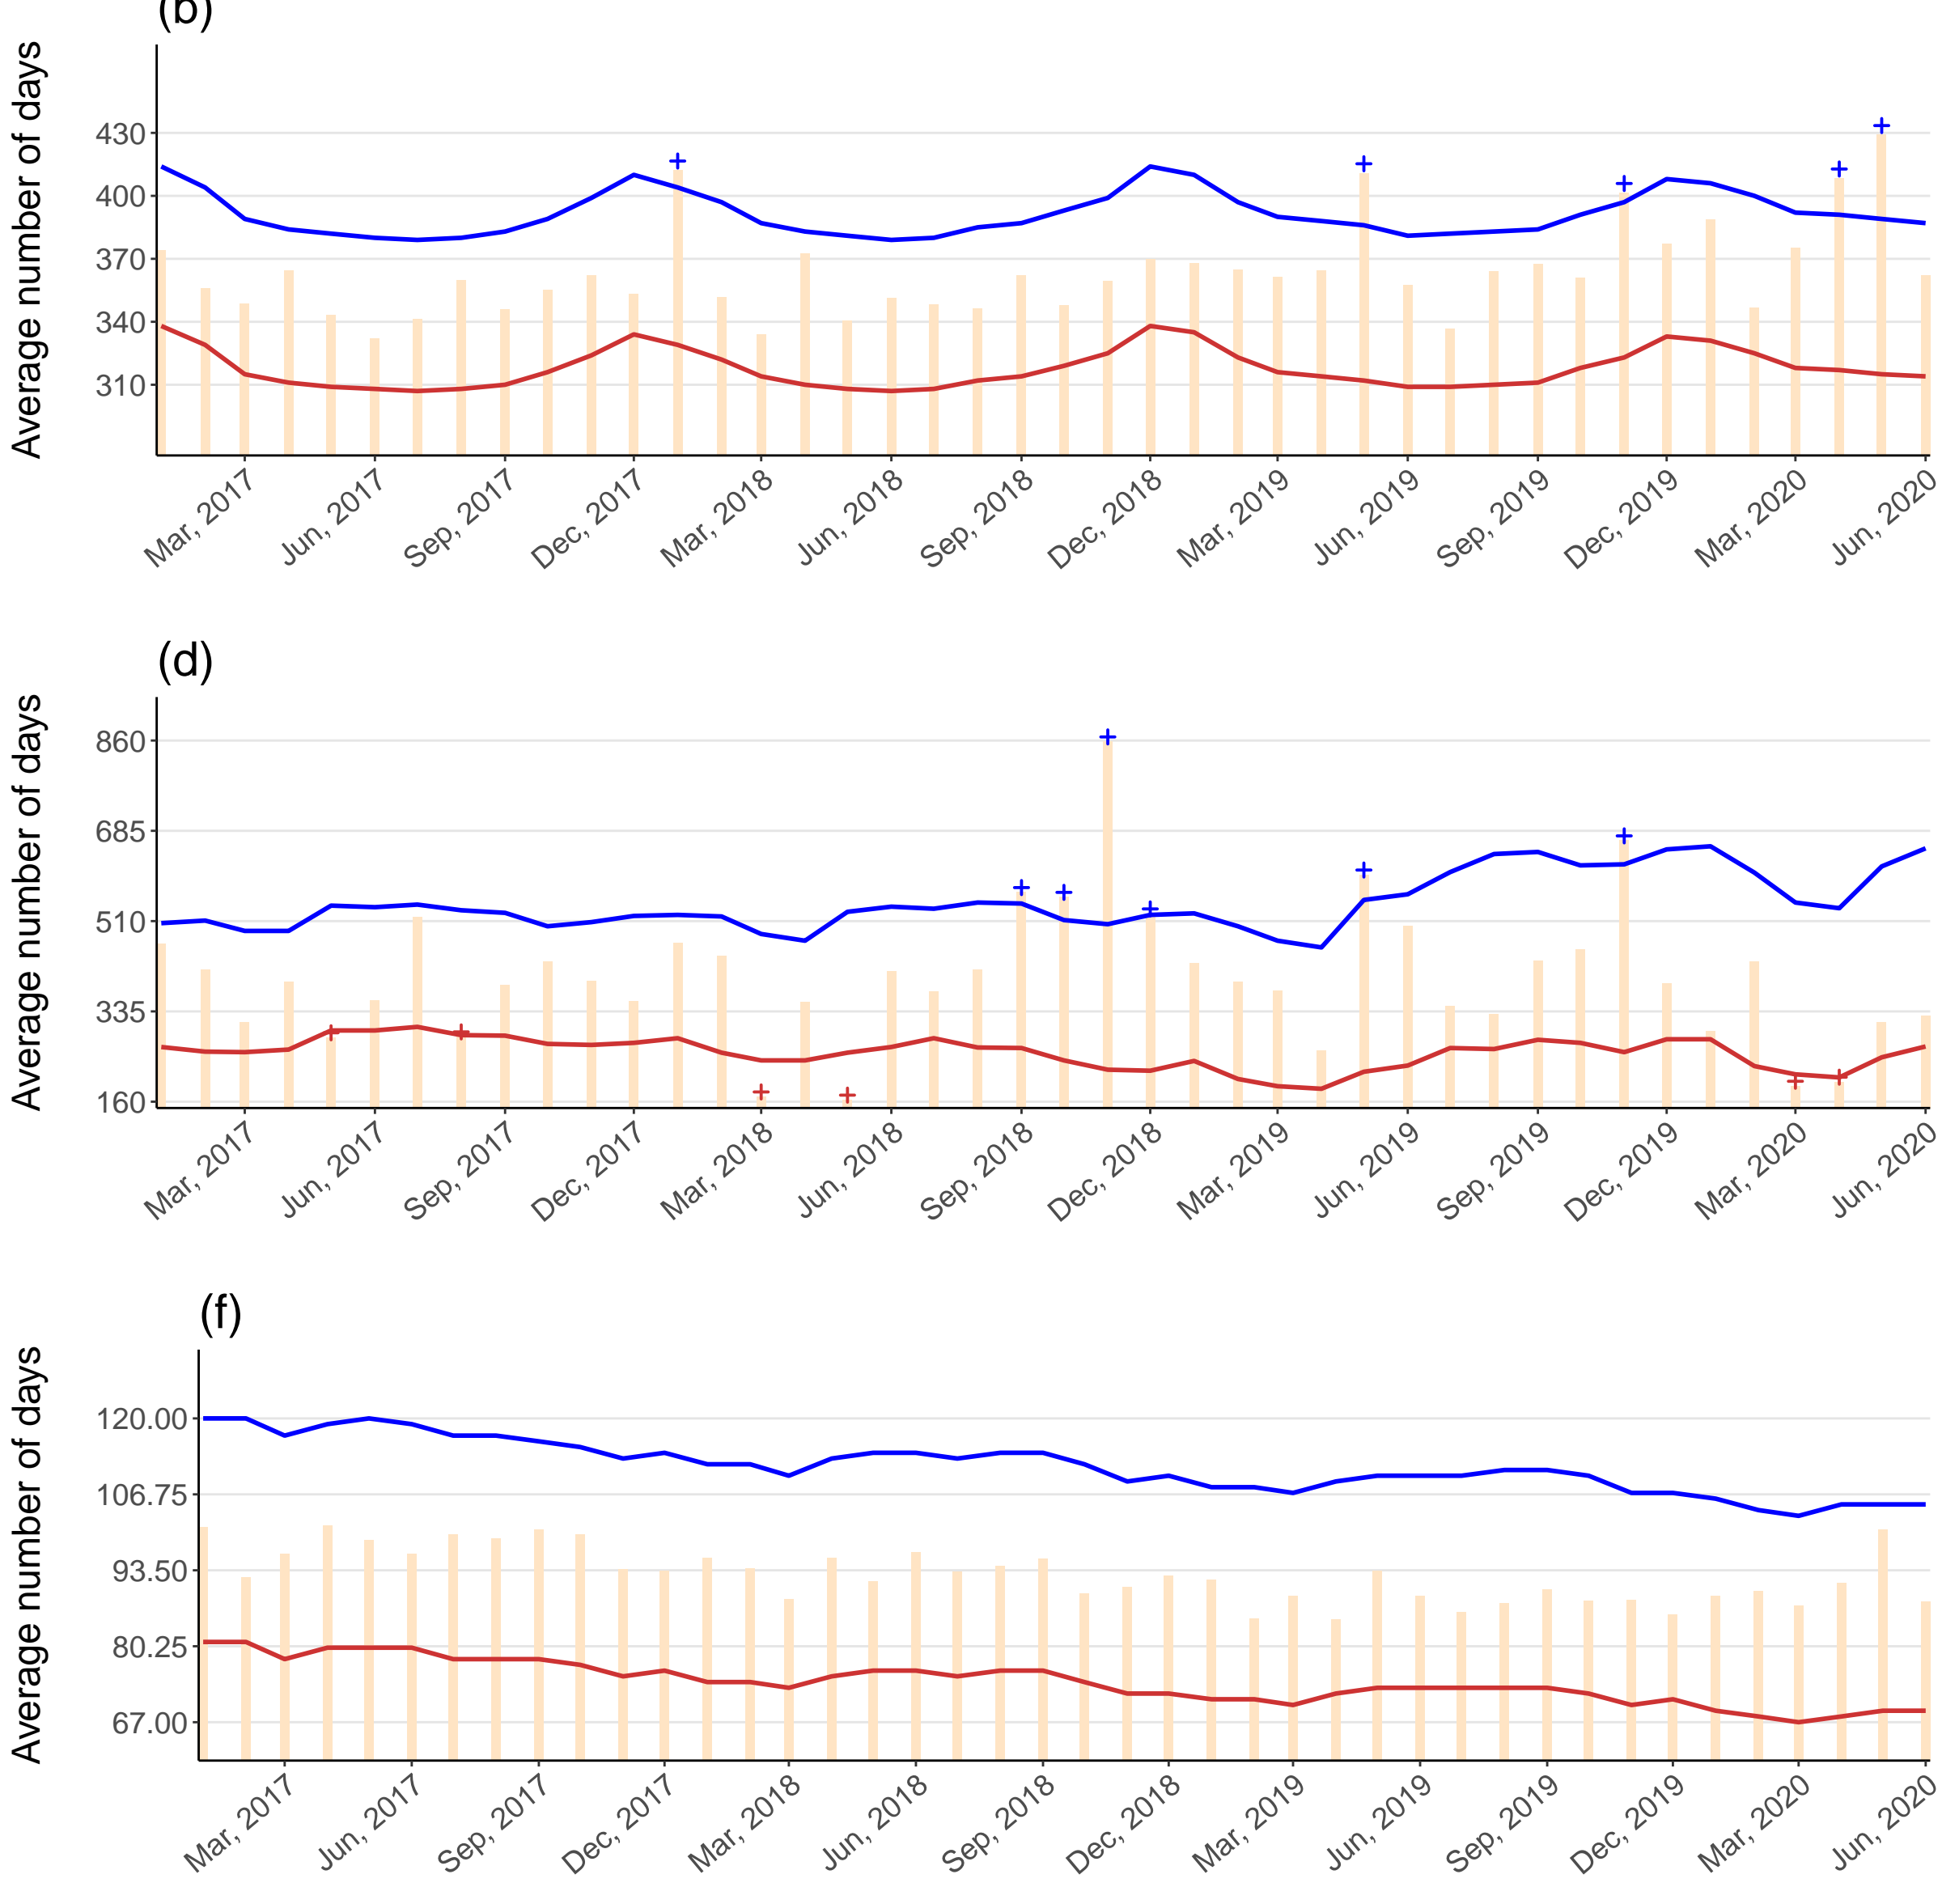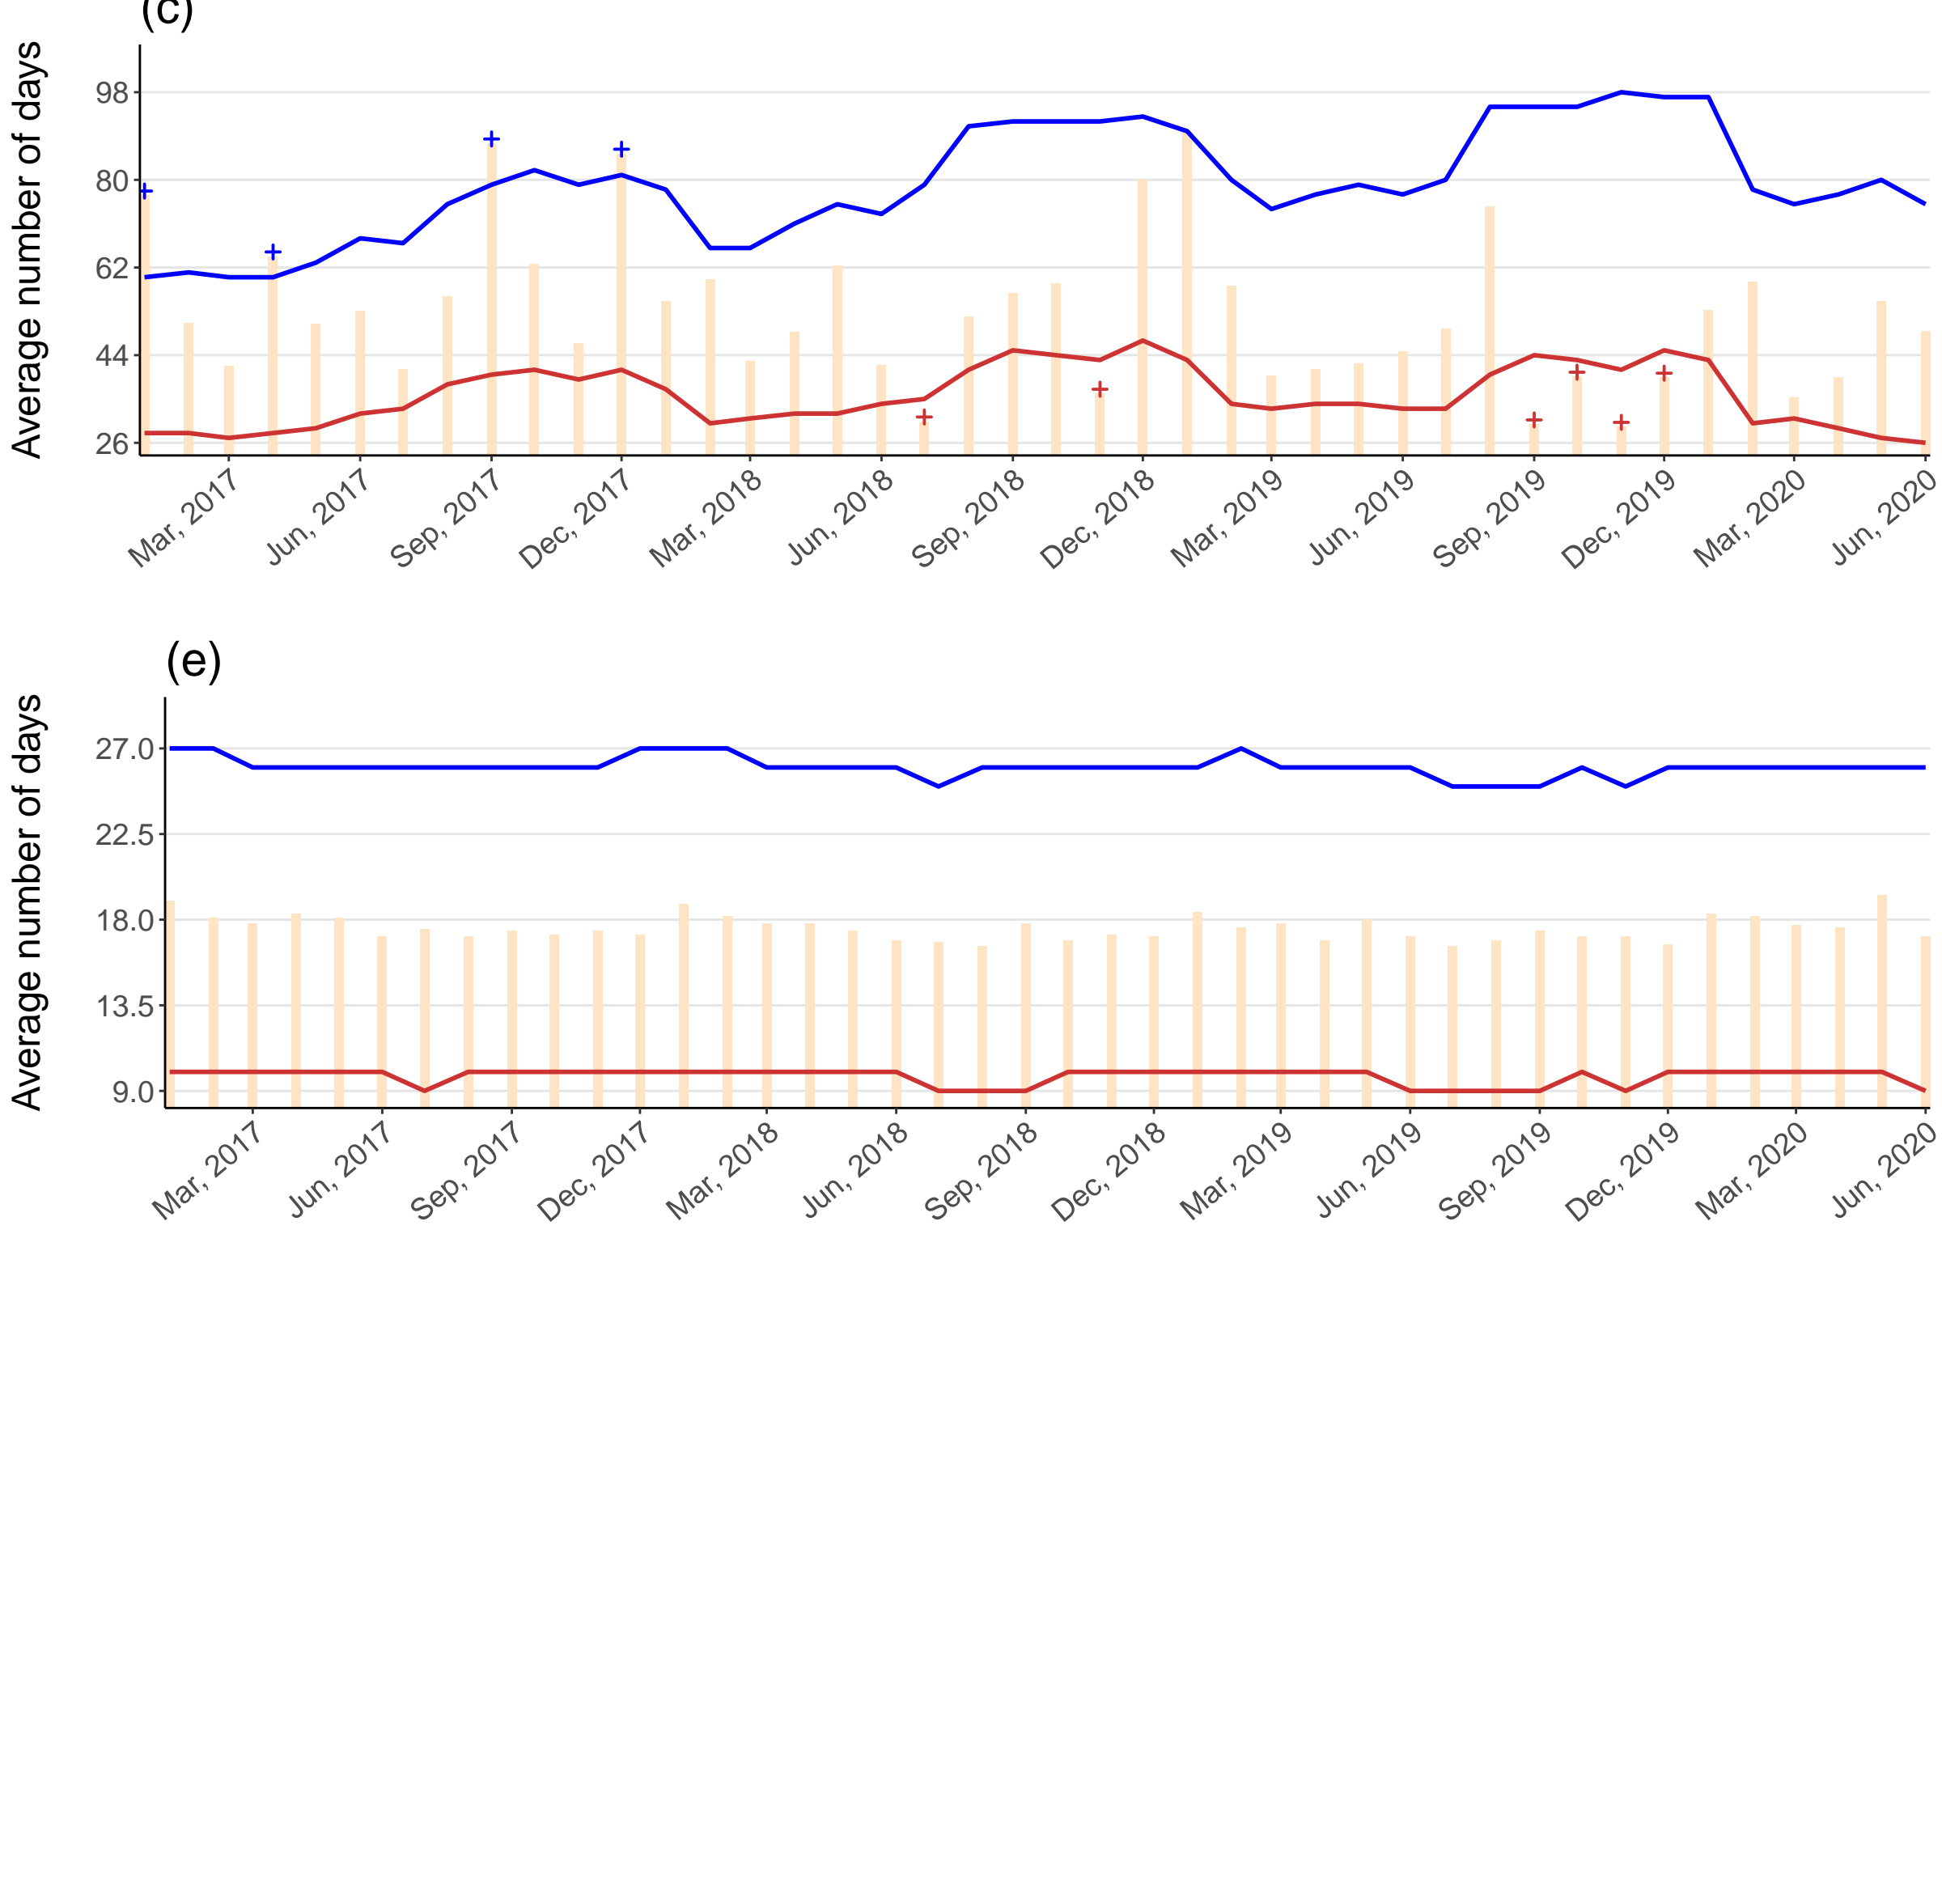



# Kumamoto

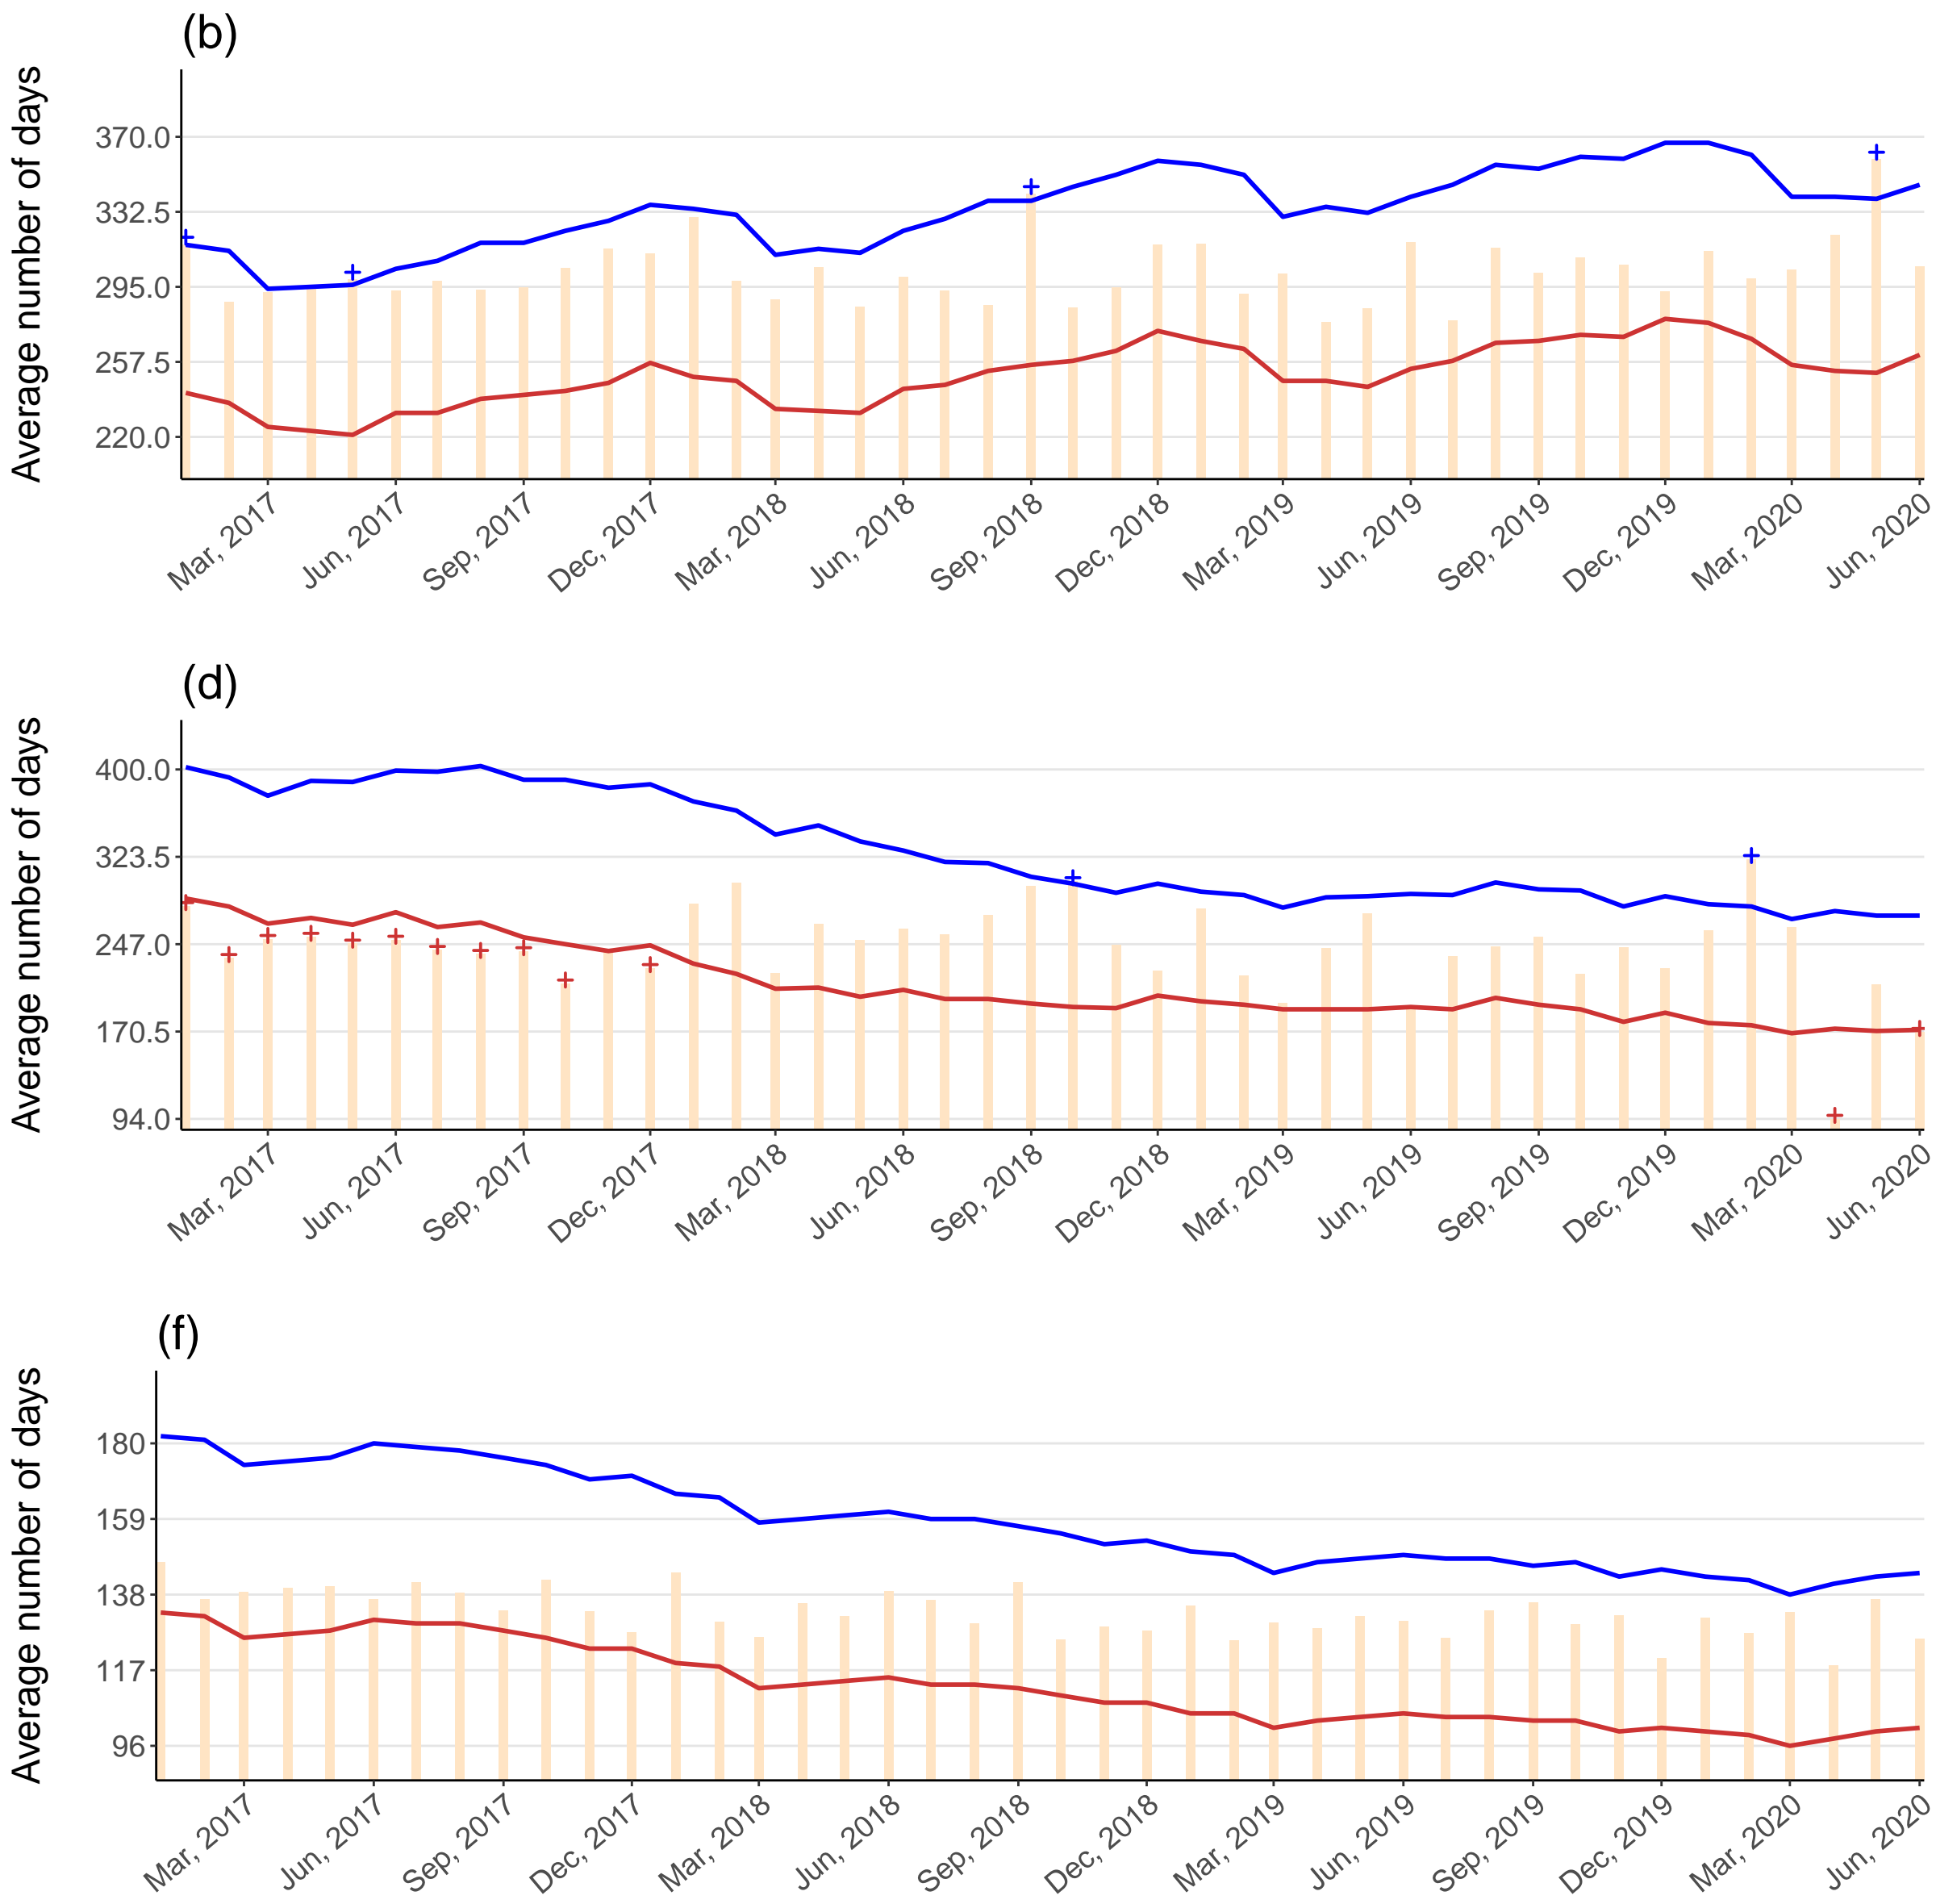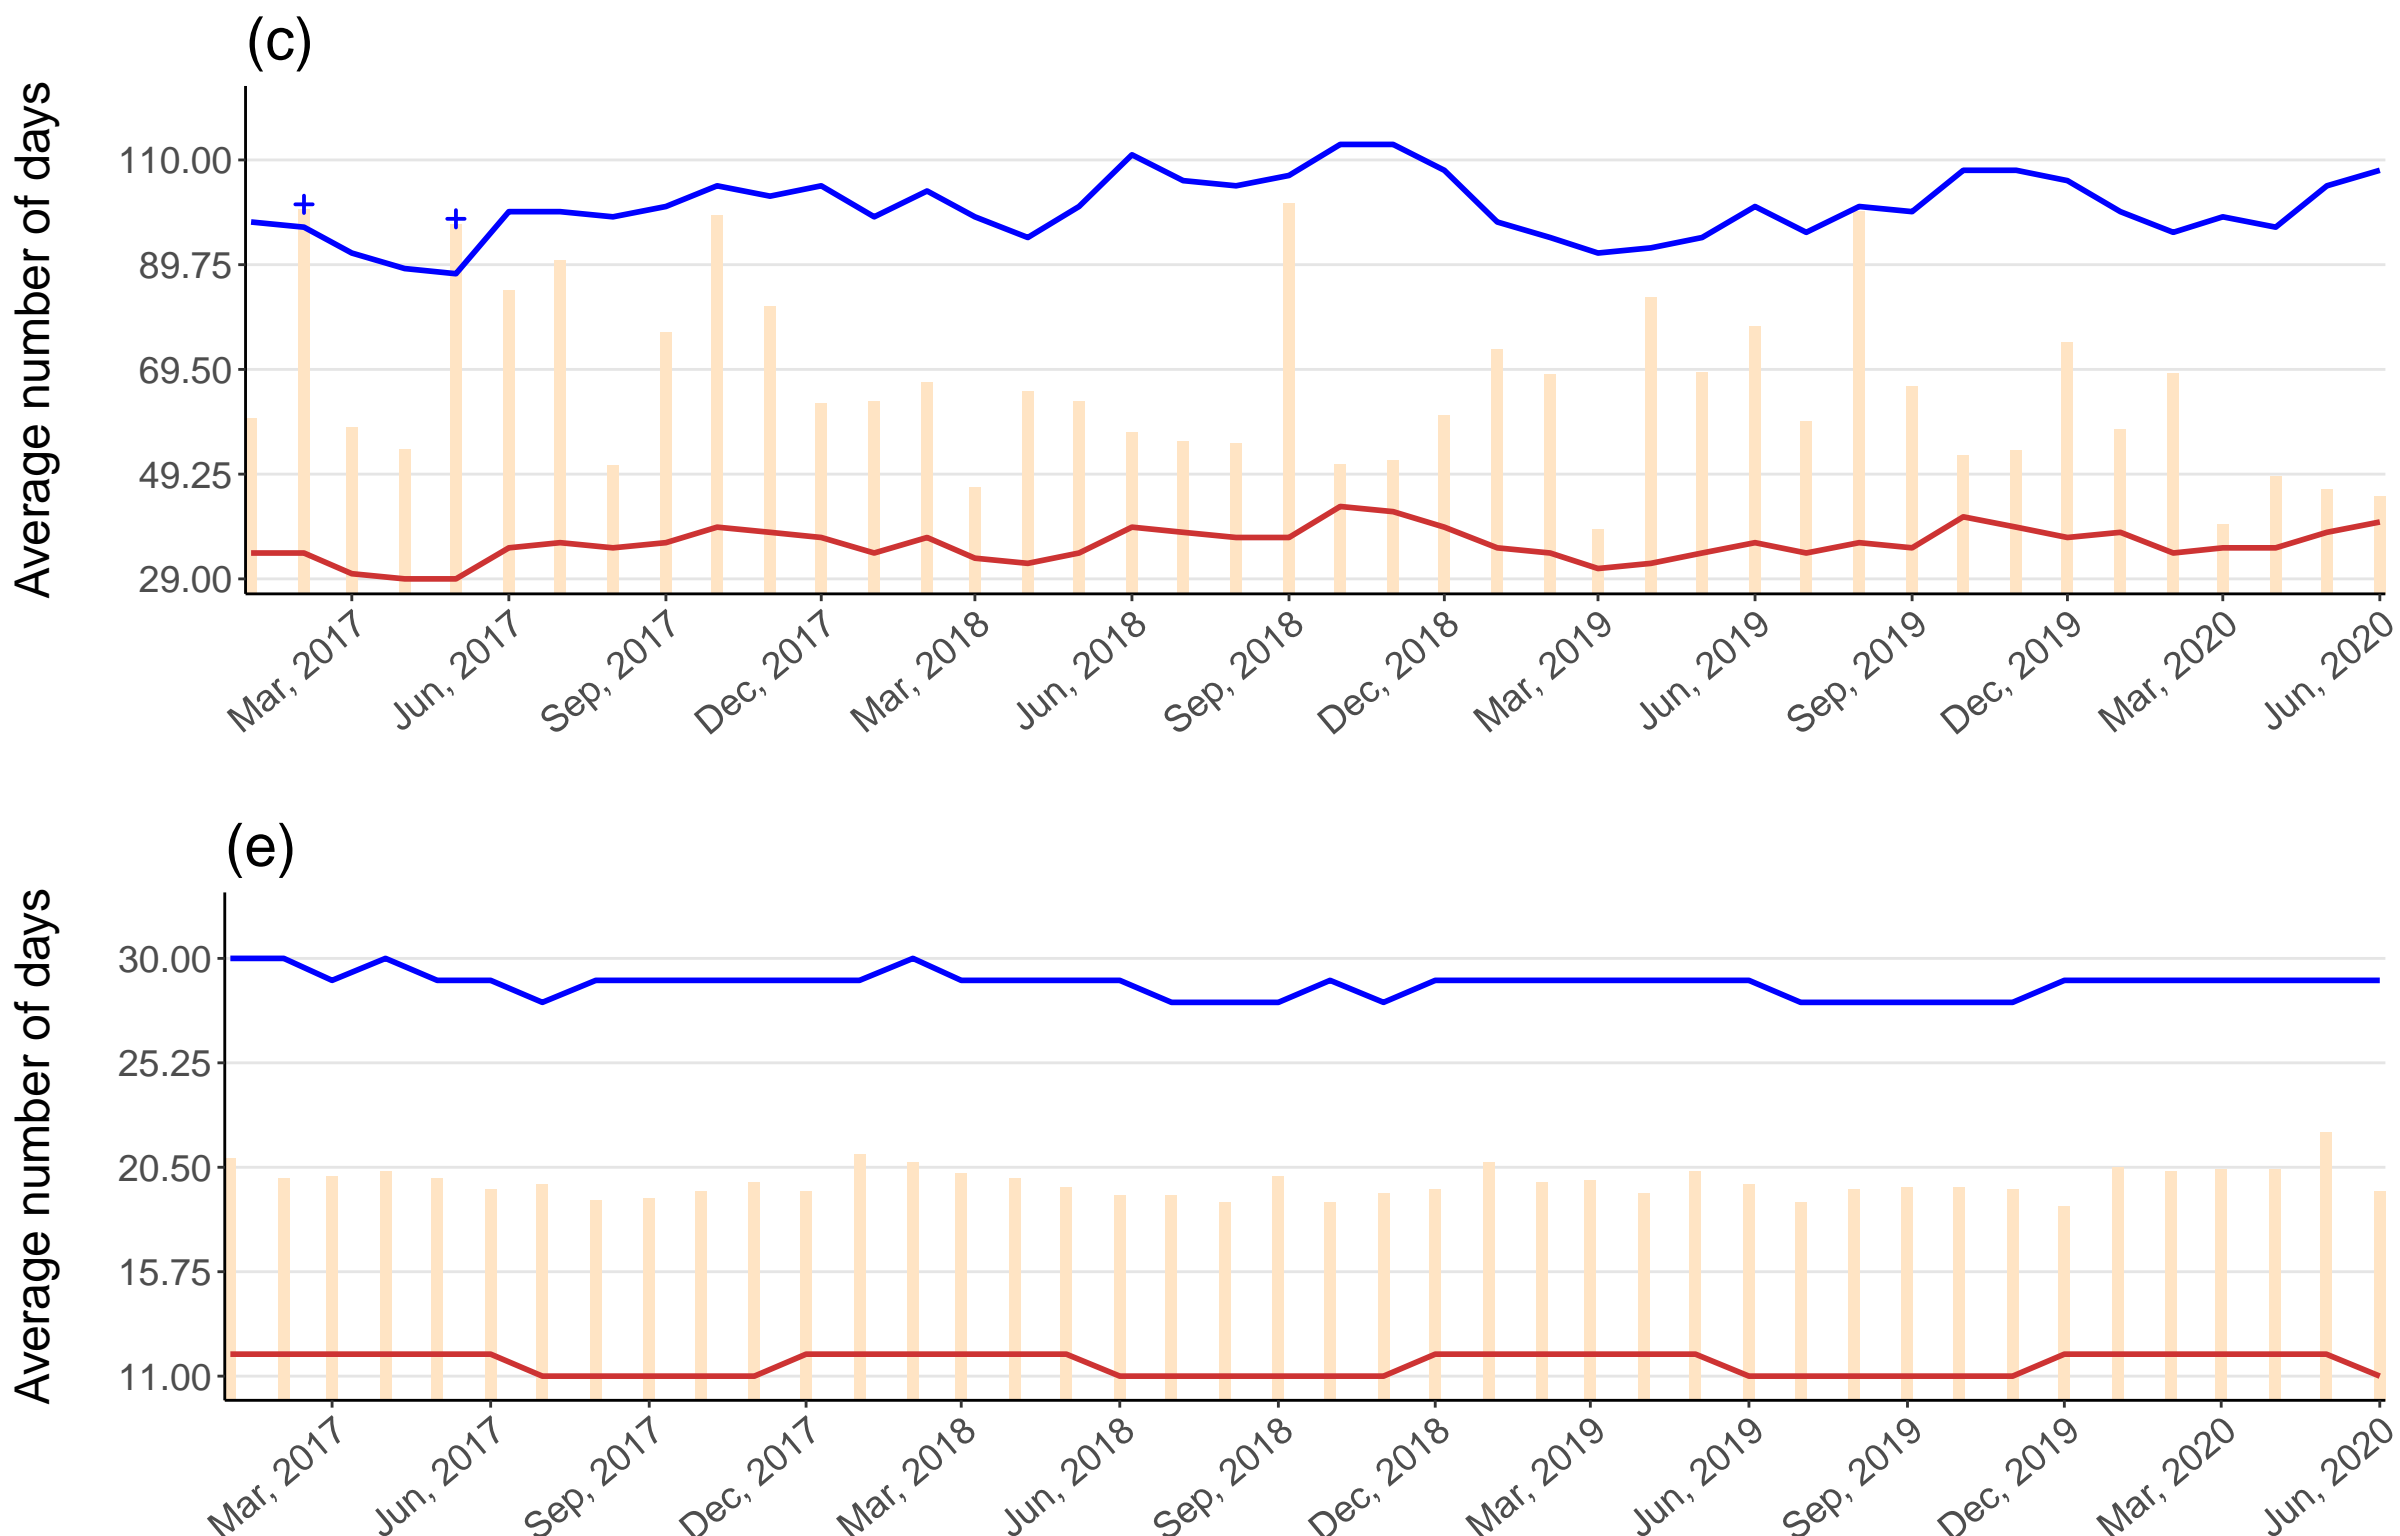

# Oita

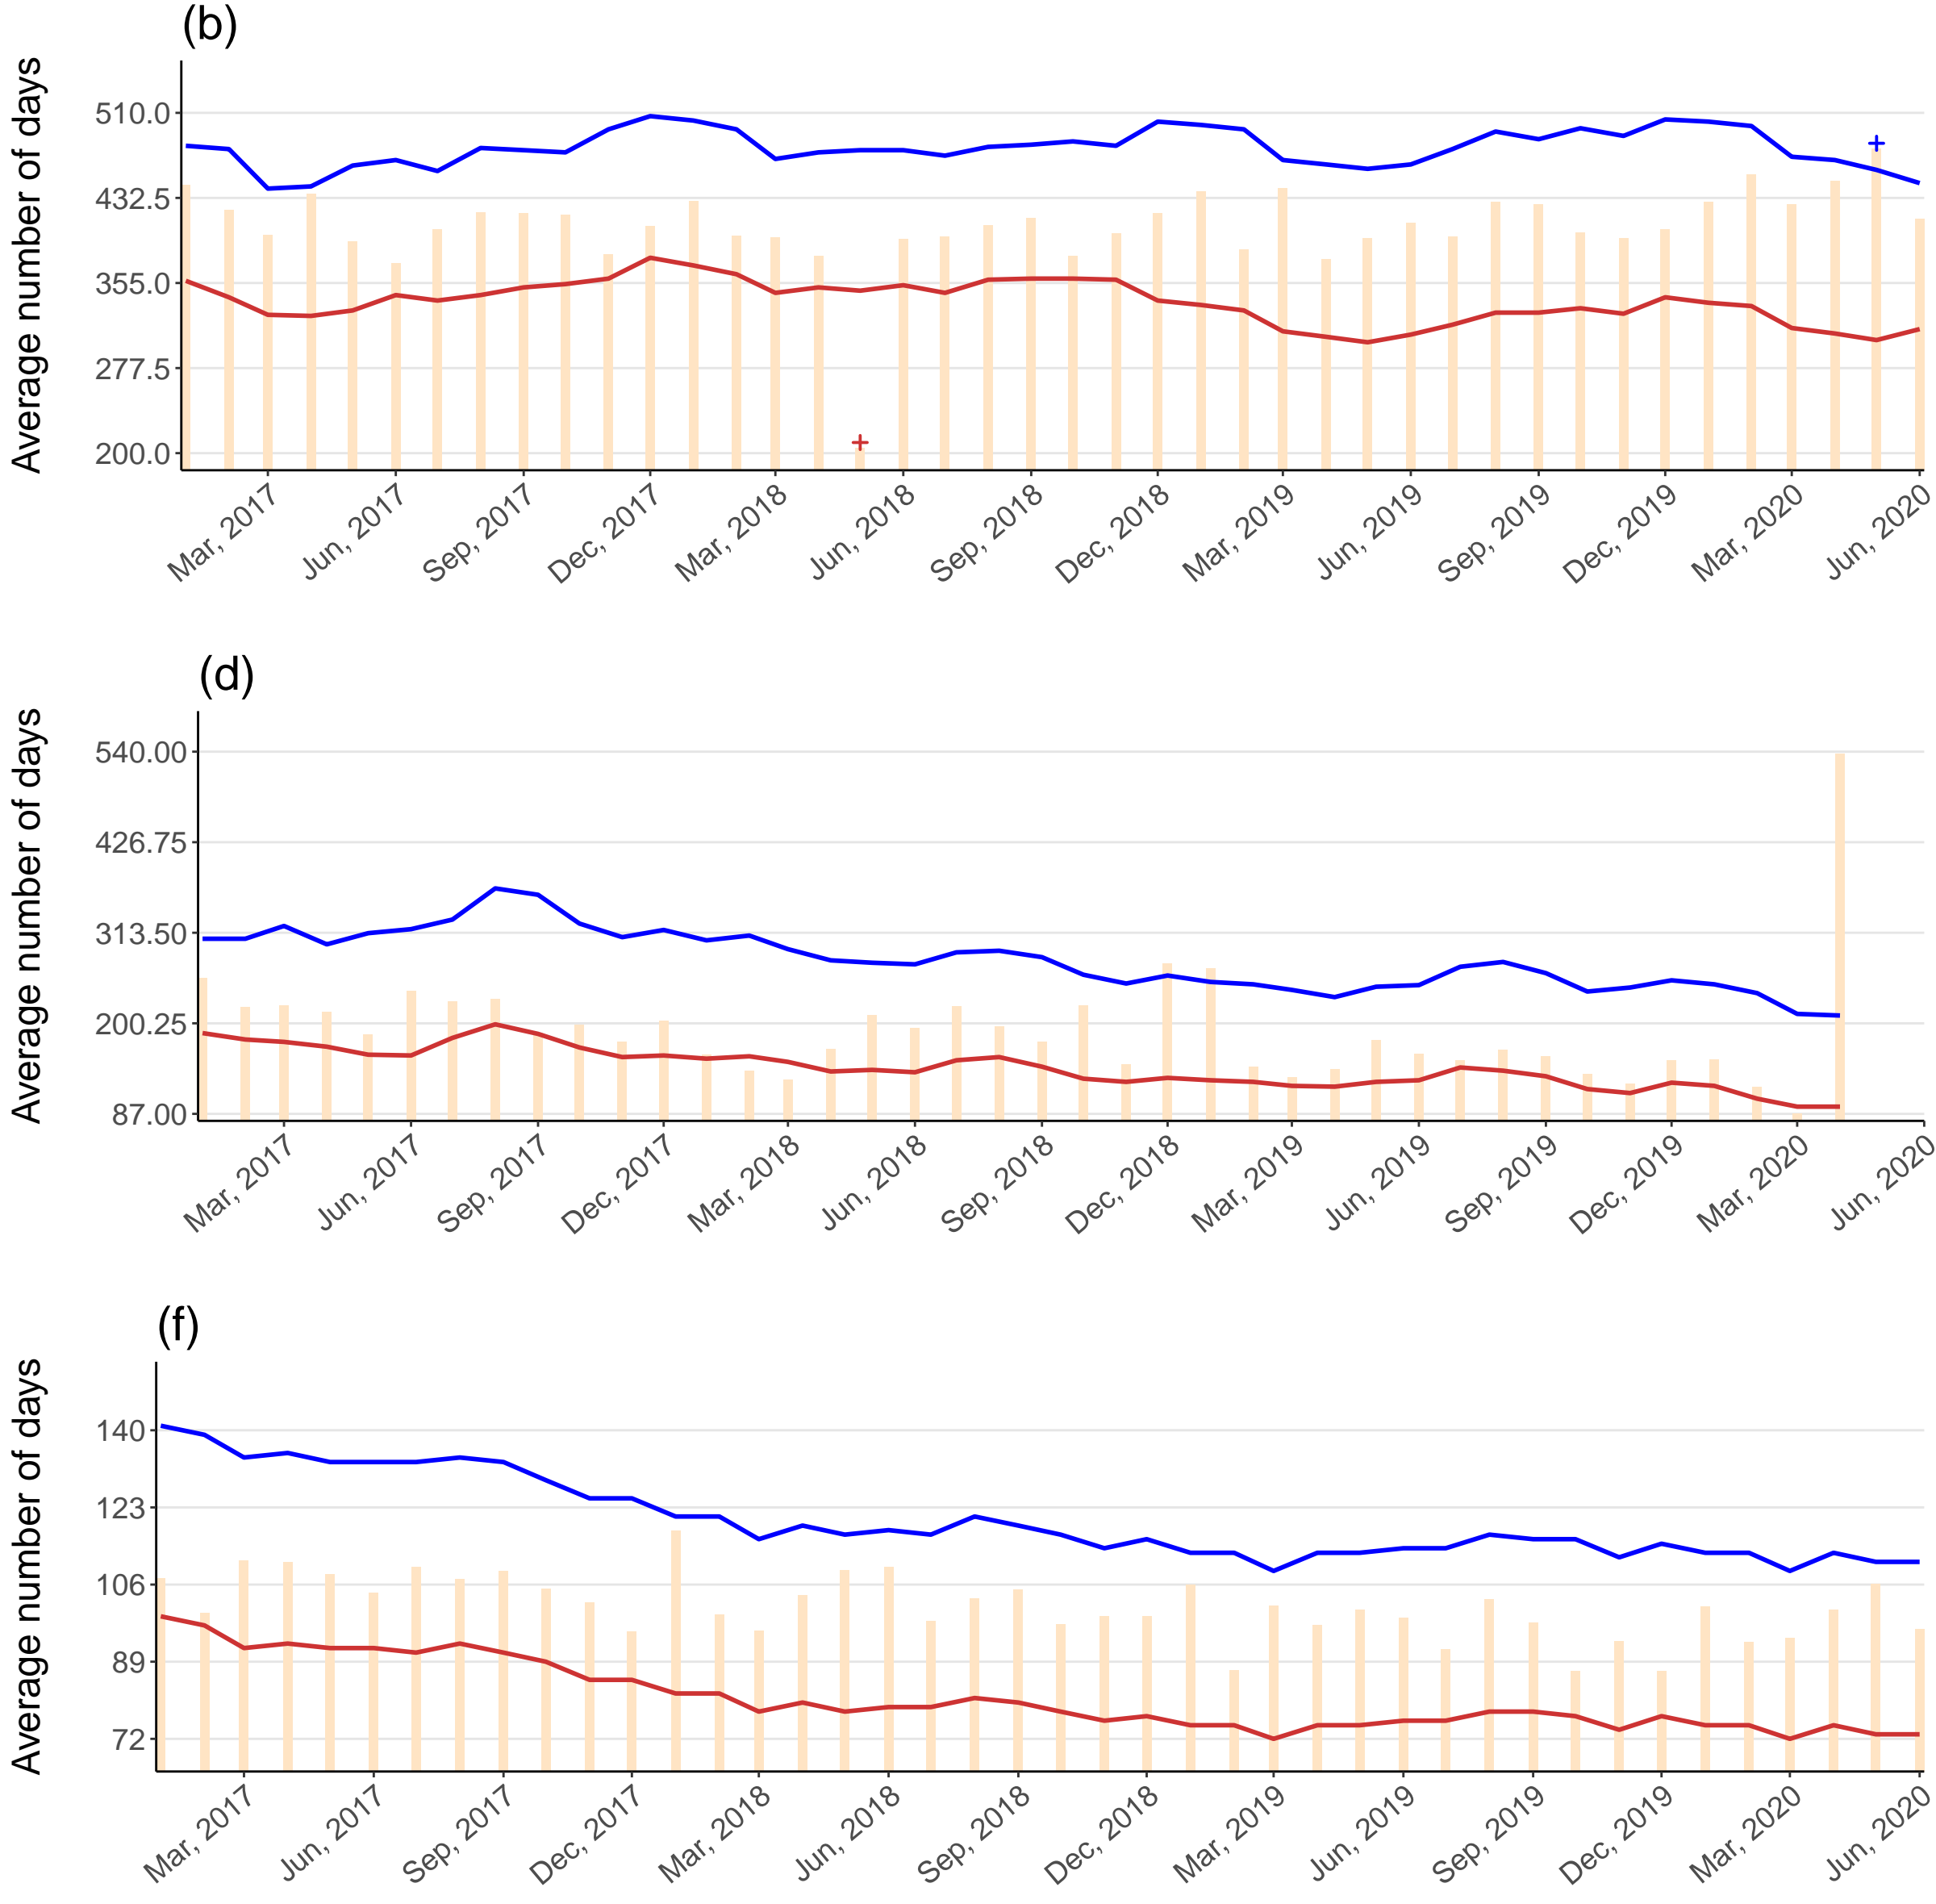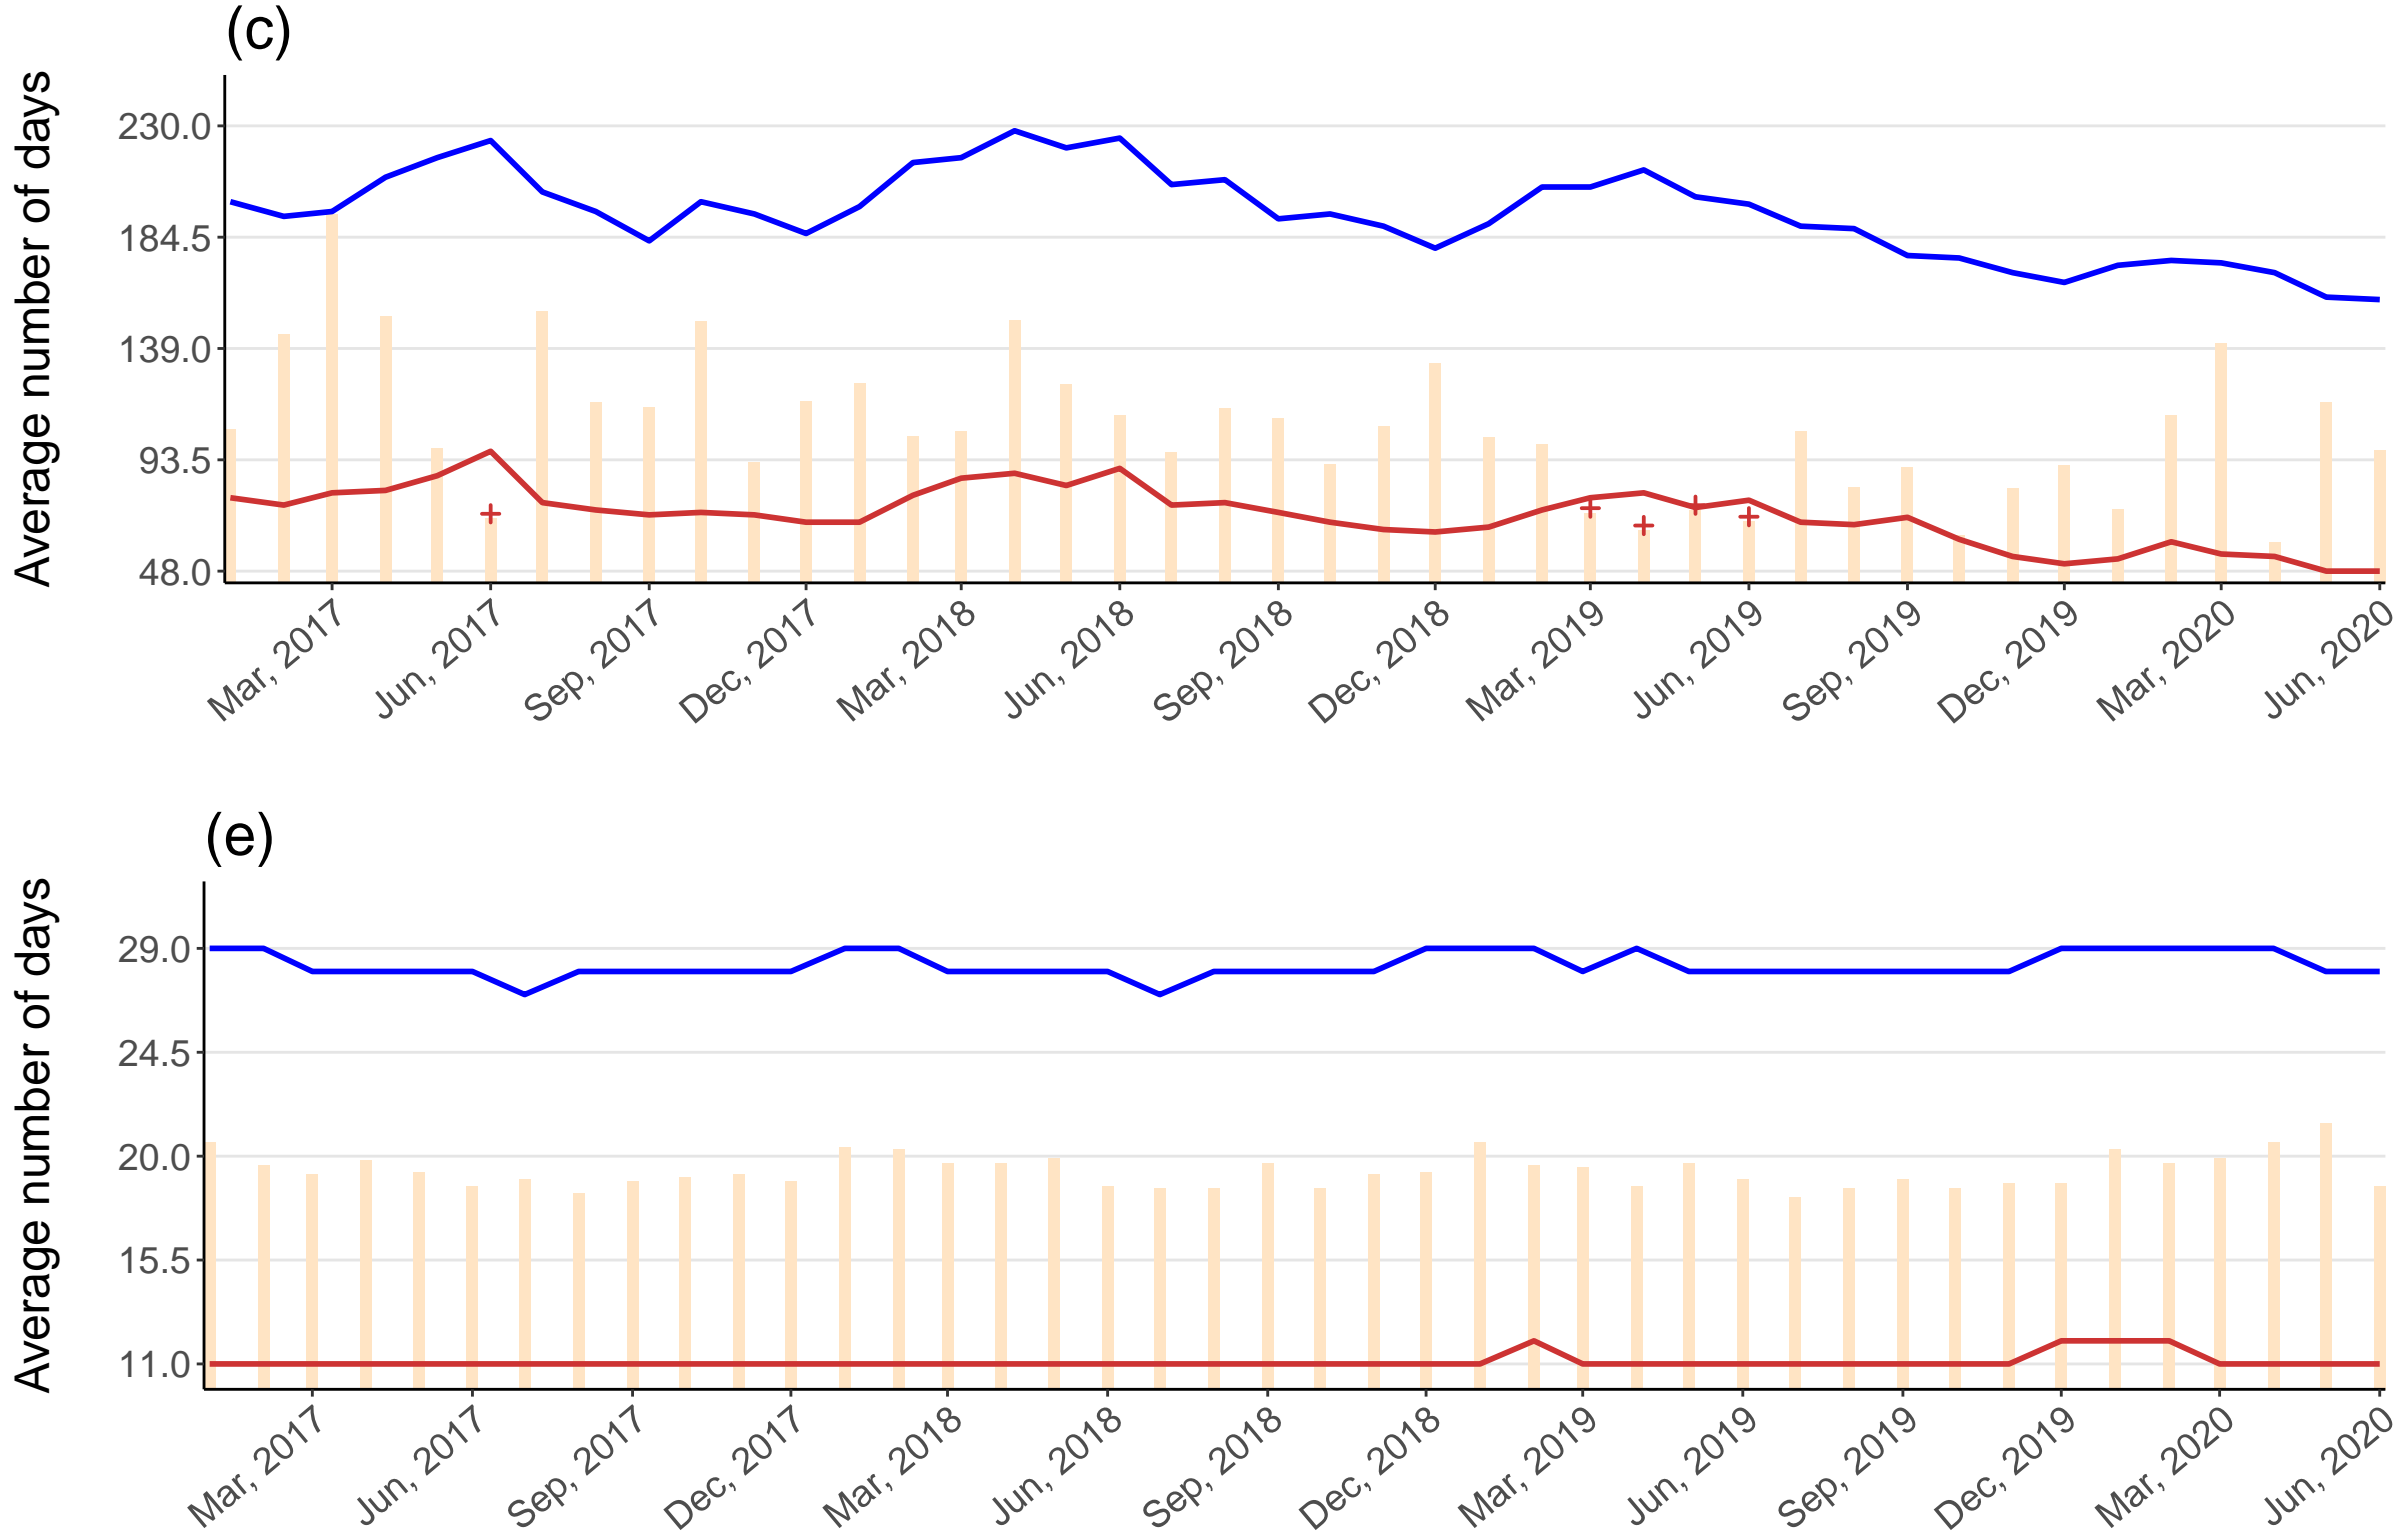

# Miyazaki

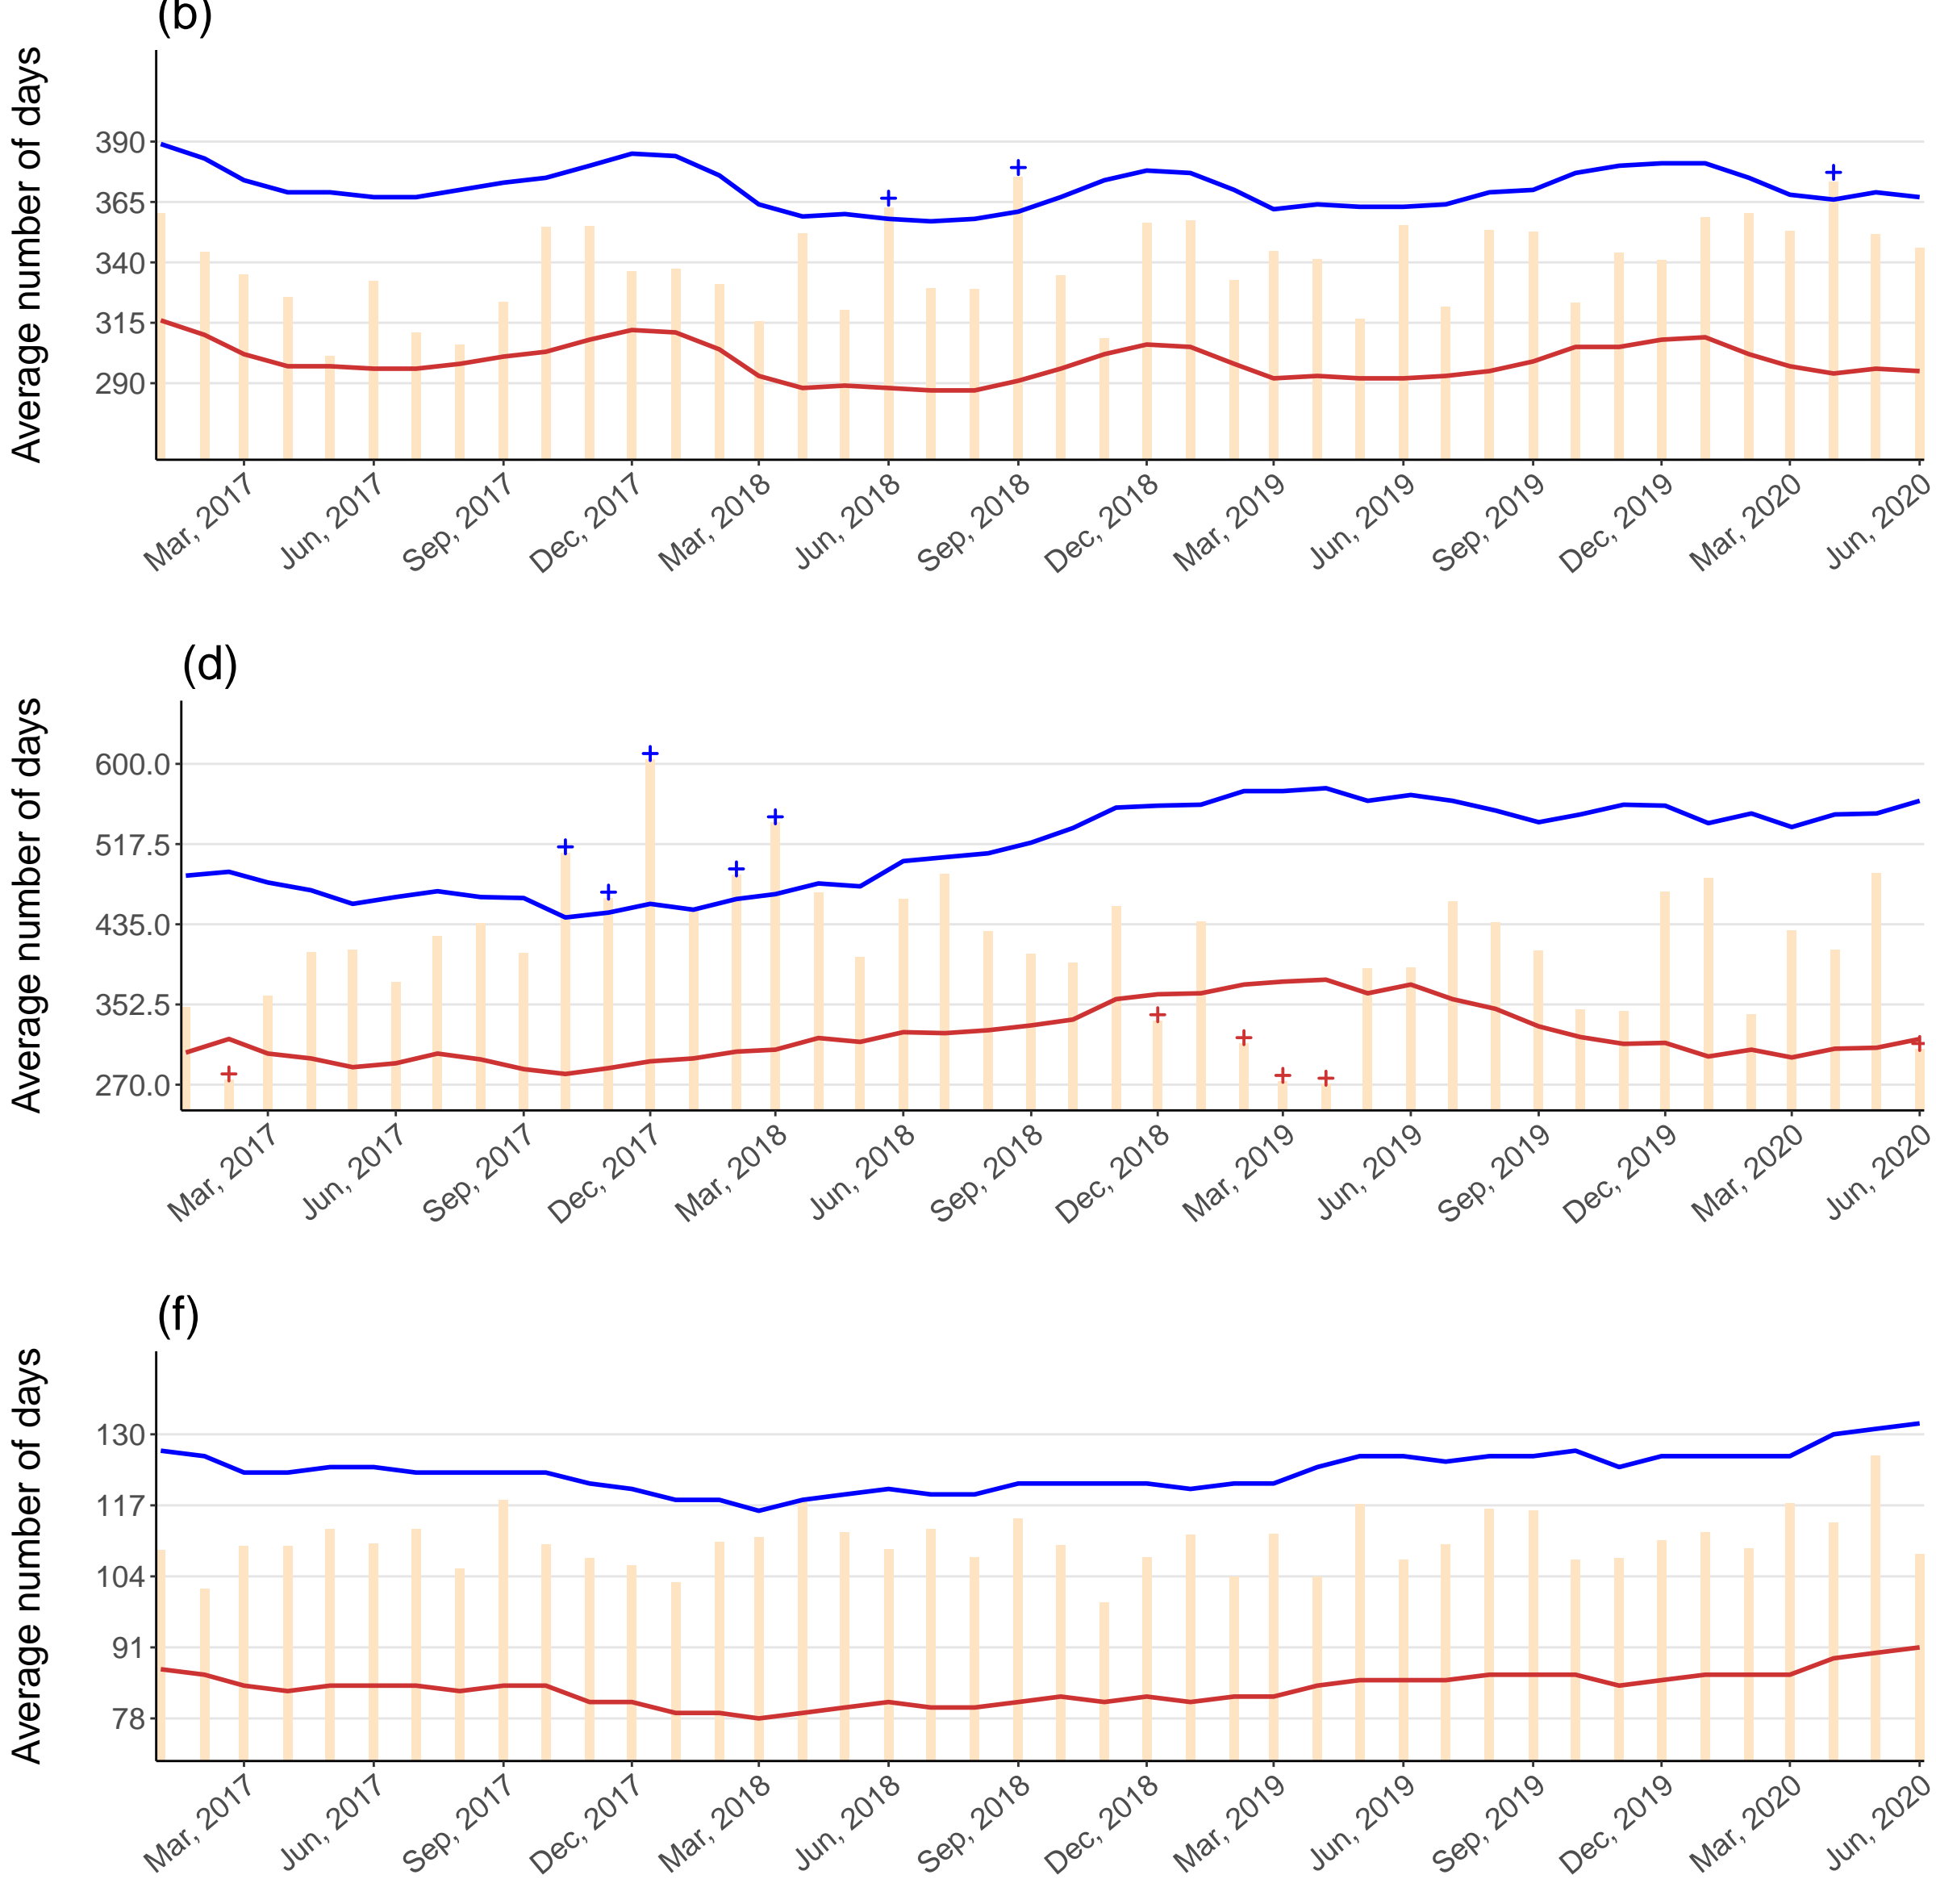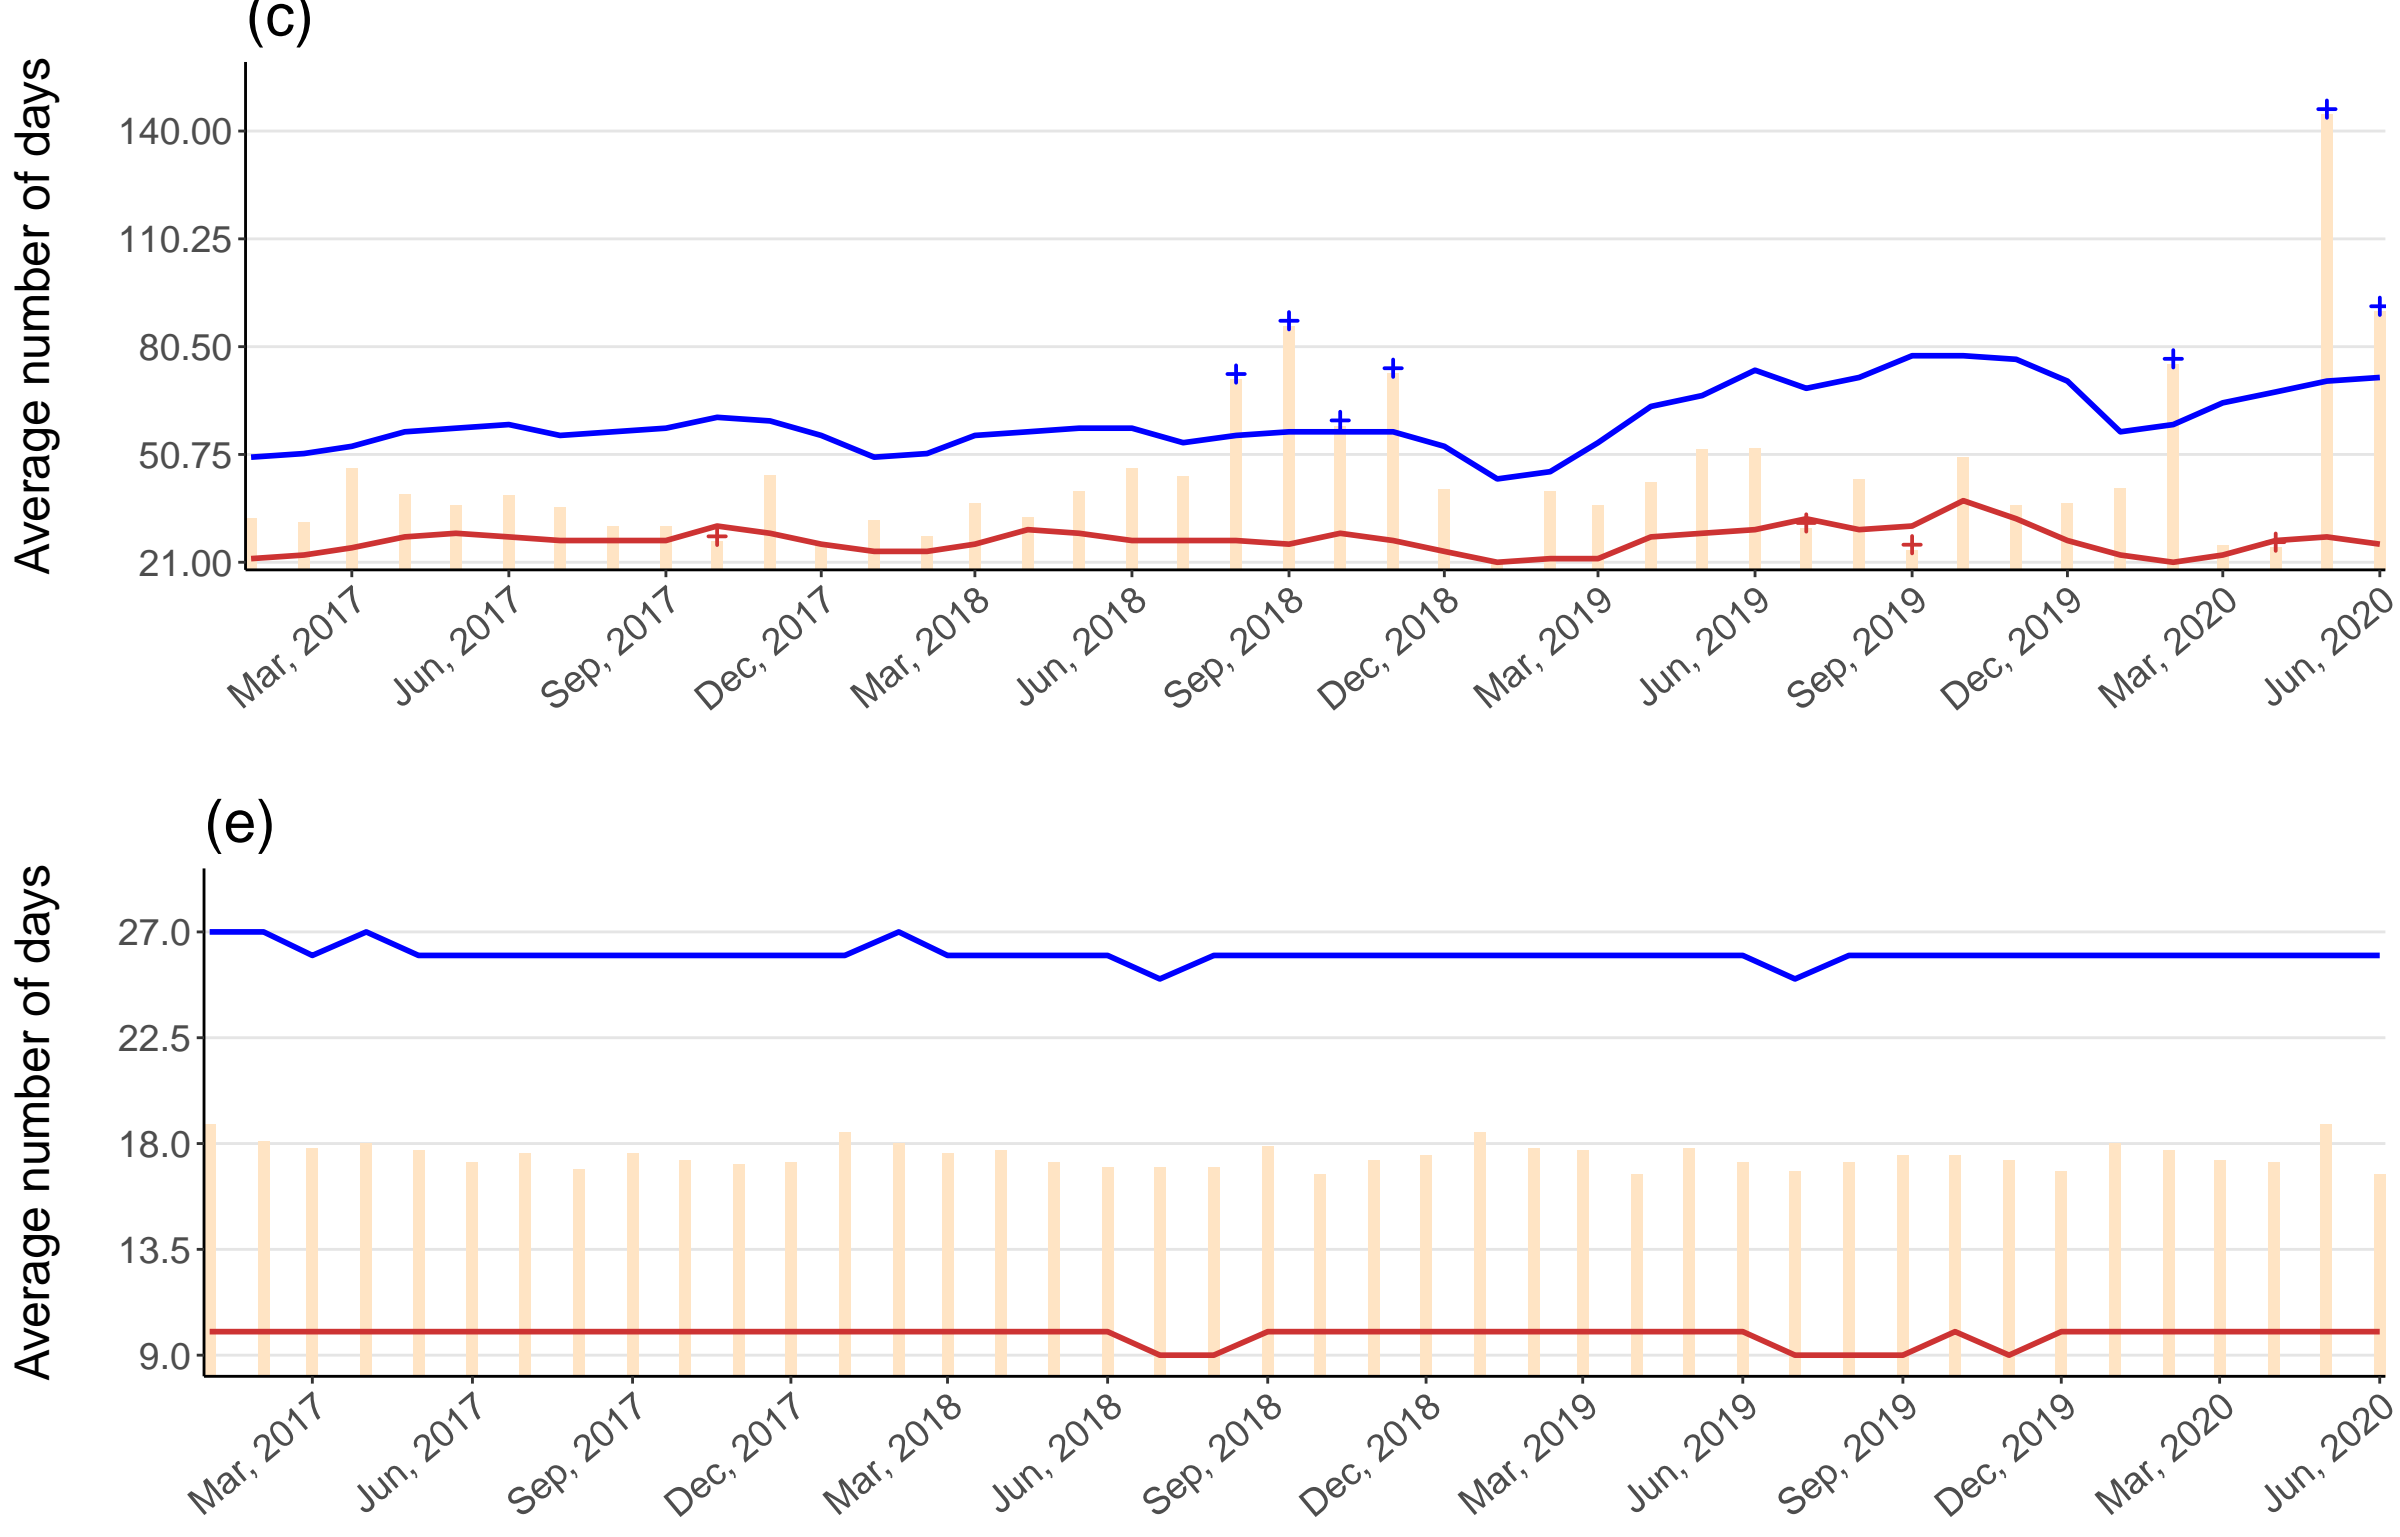

# Kagoshima

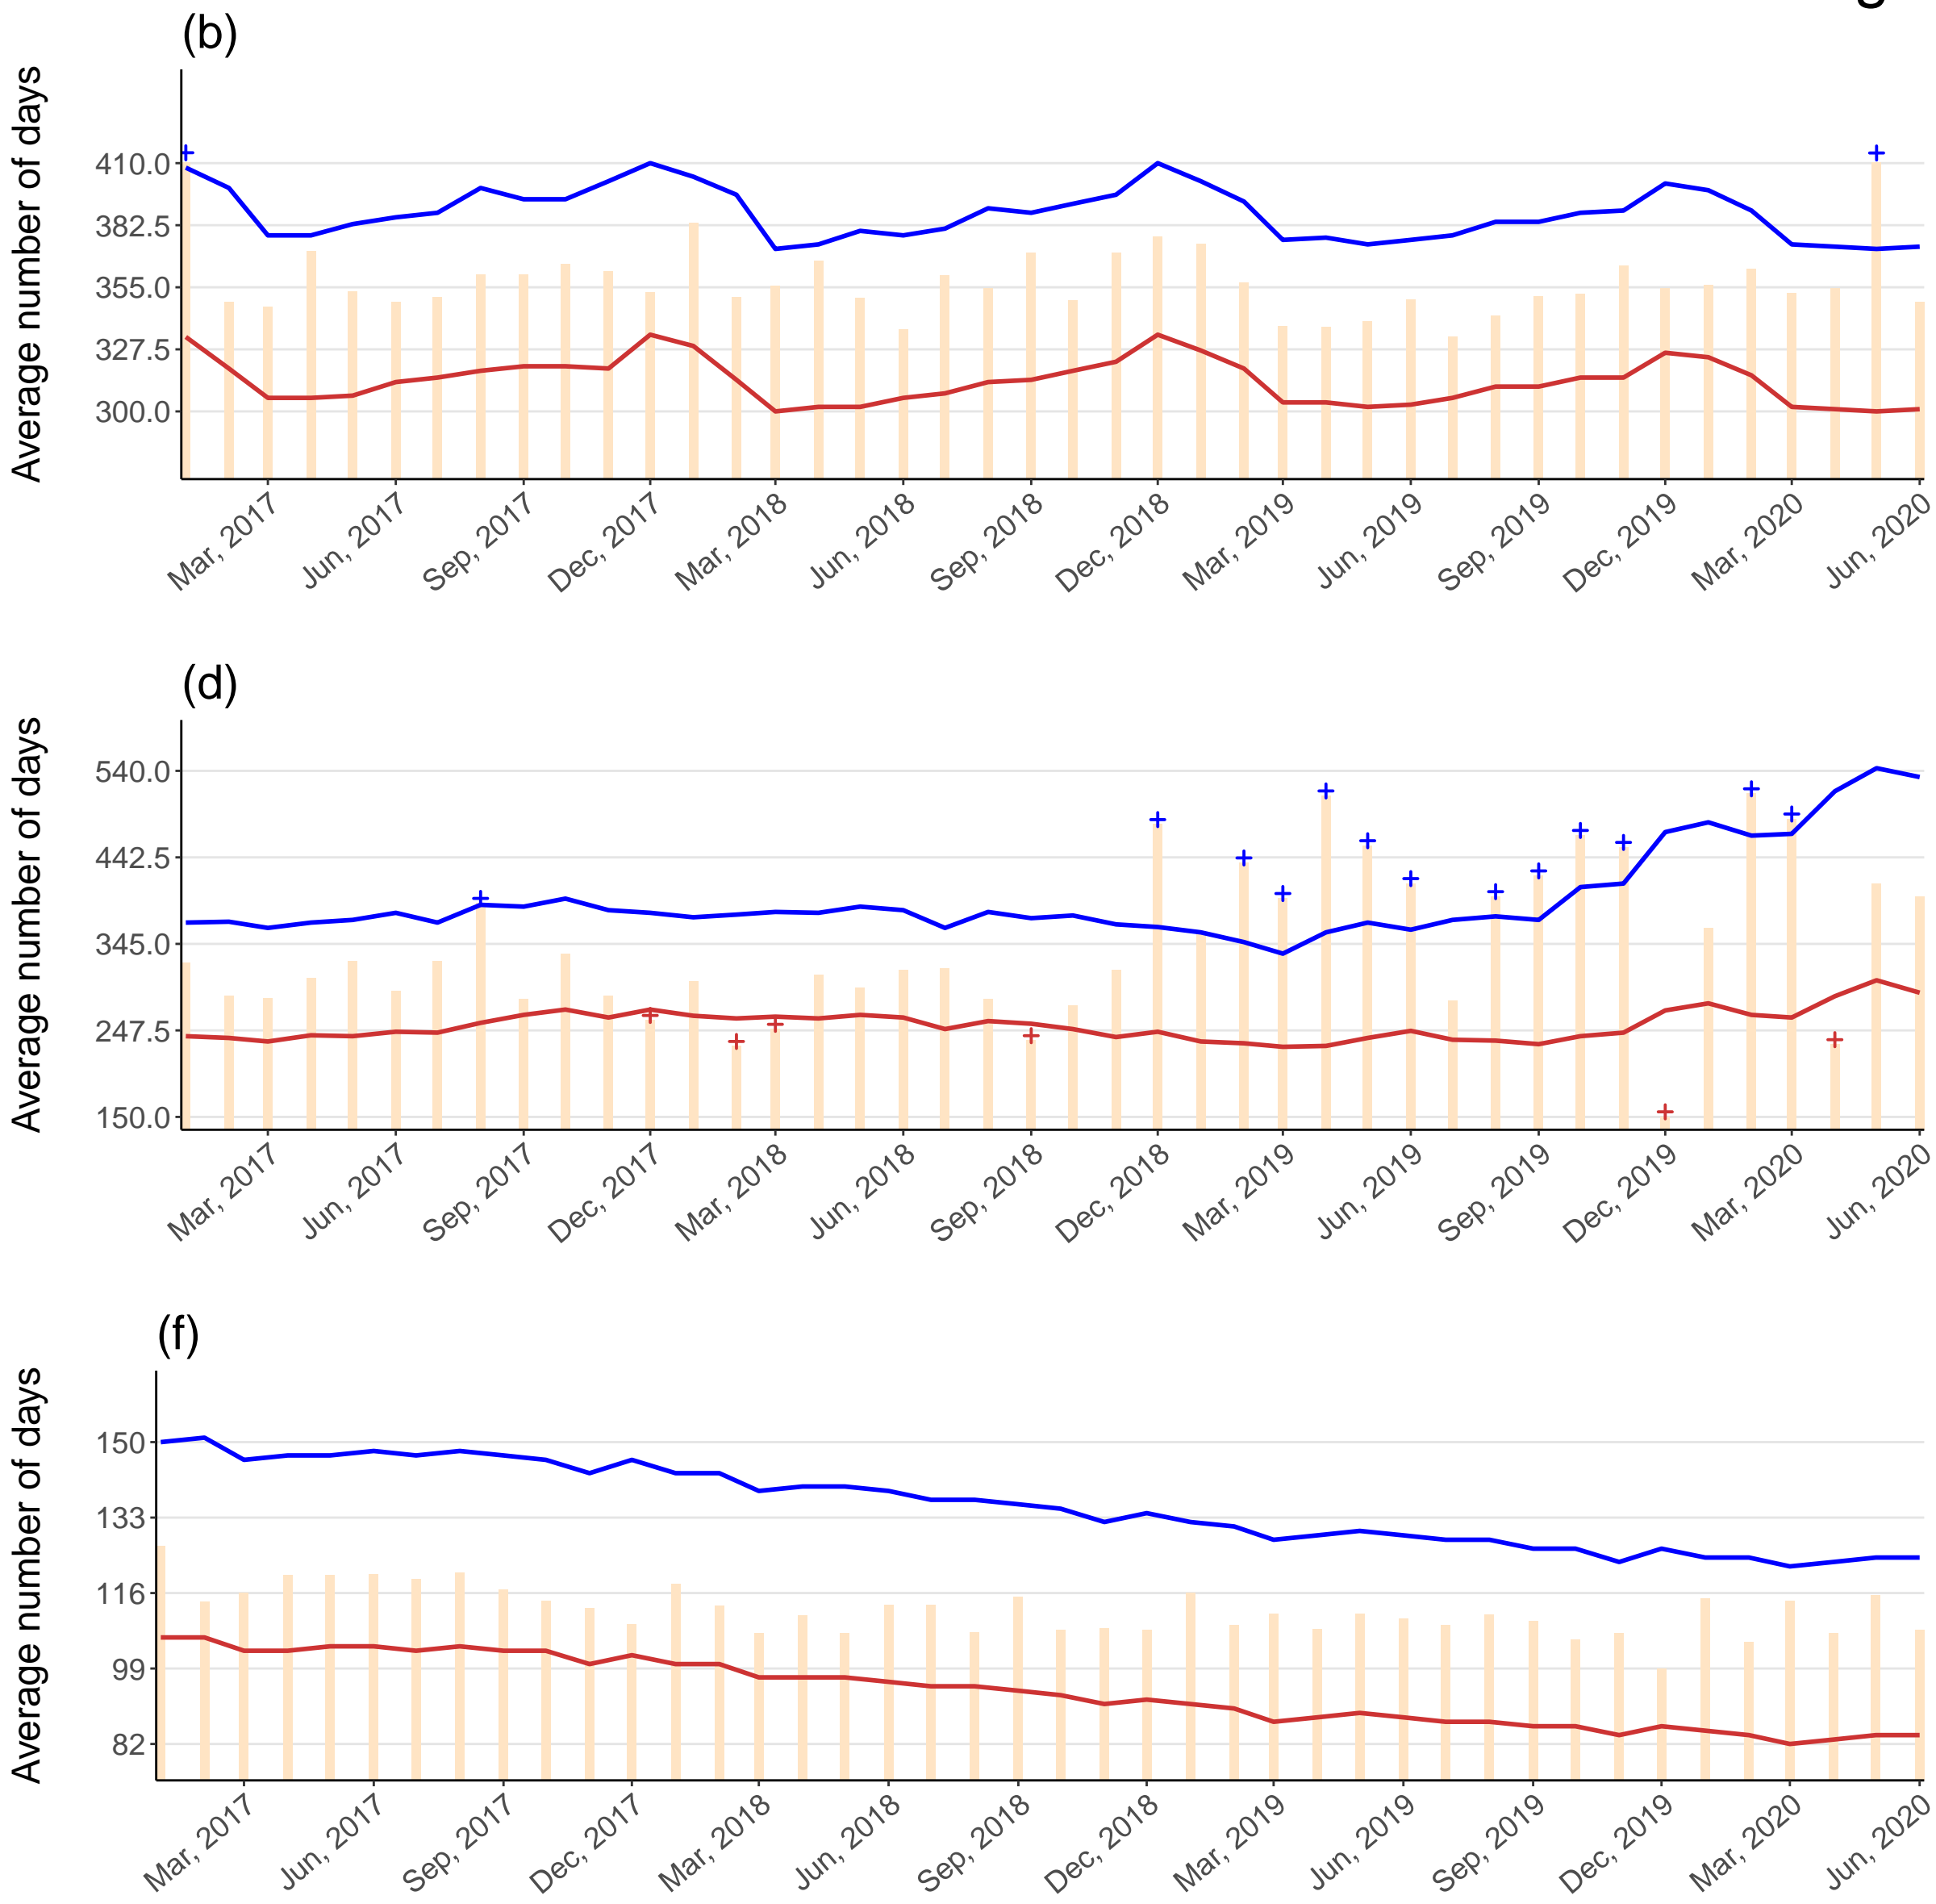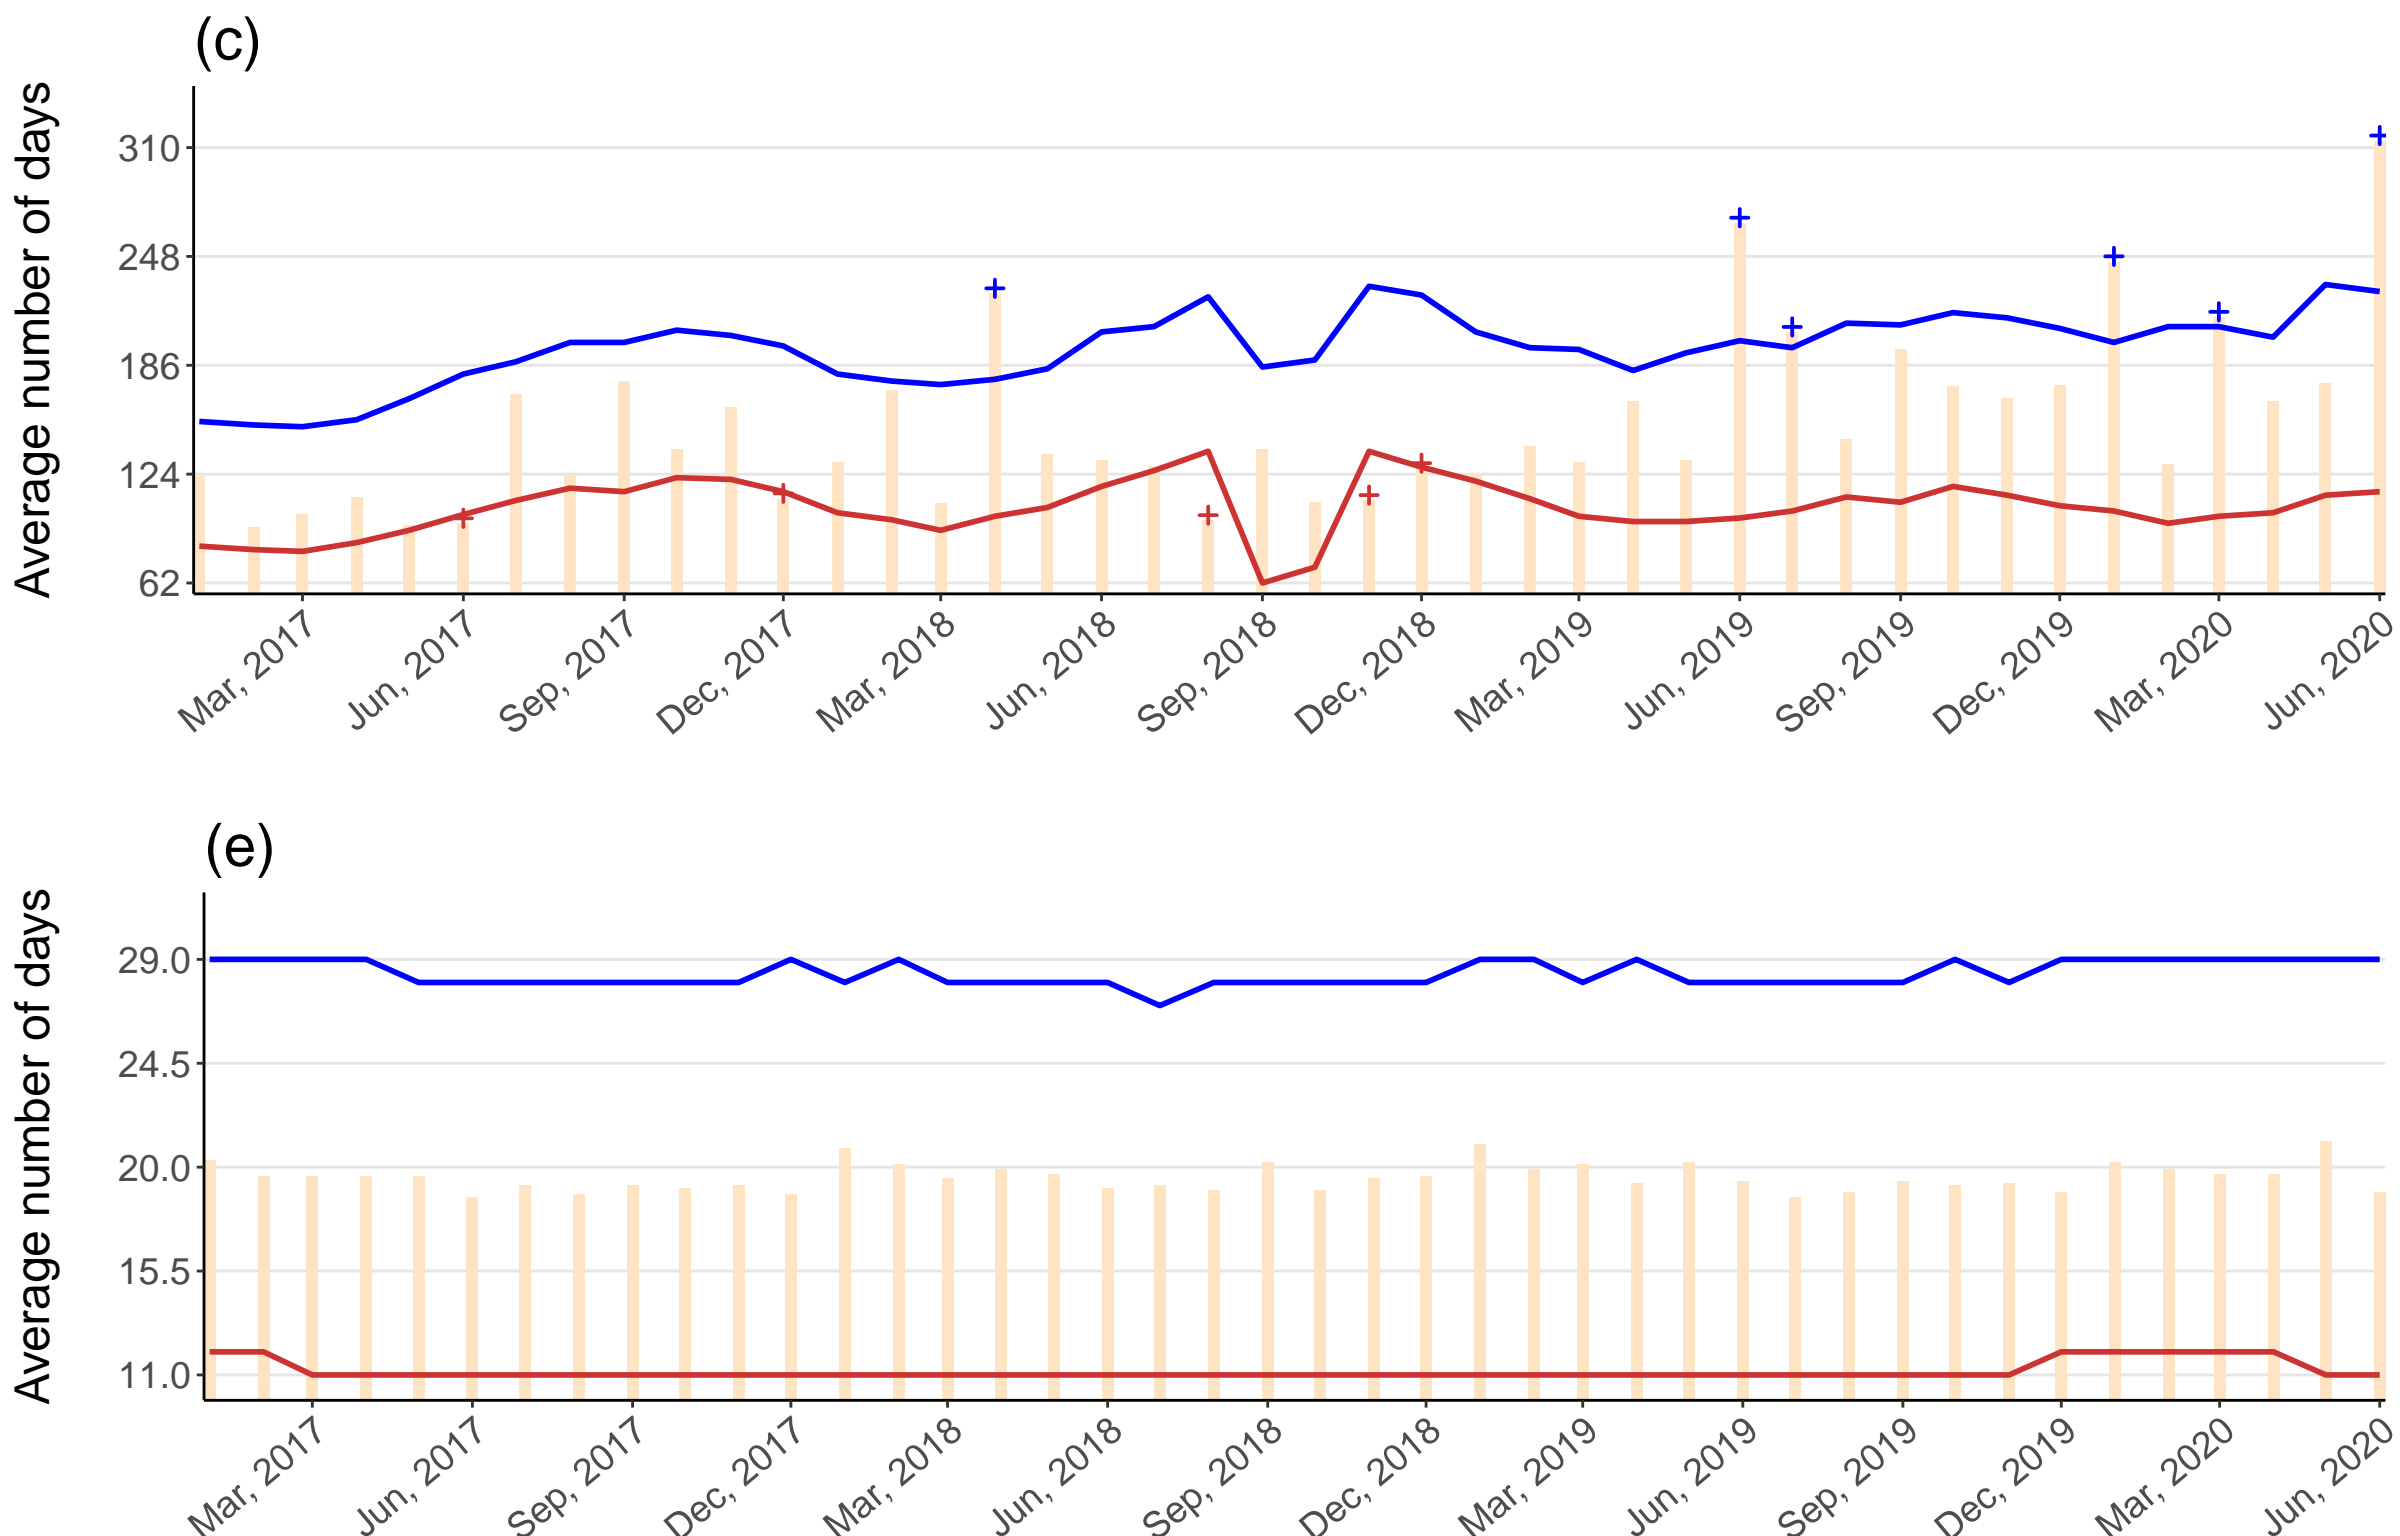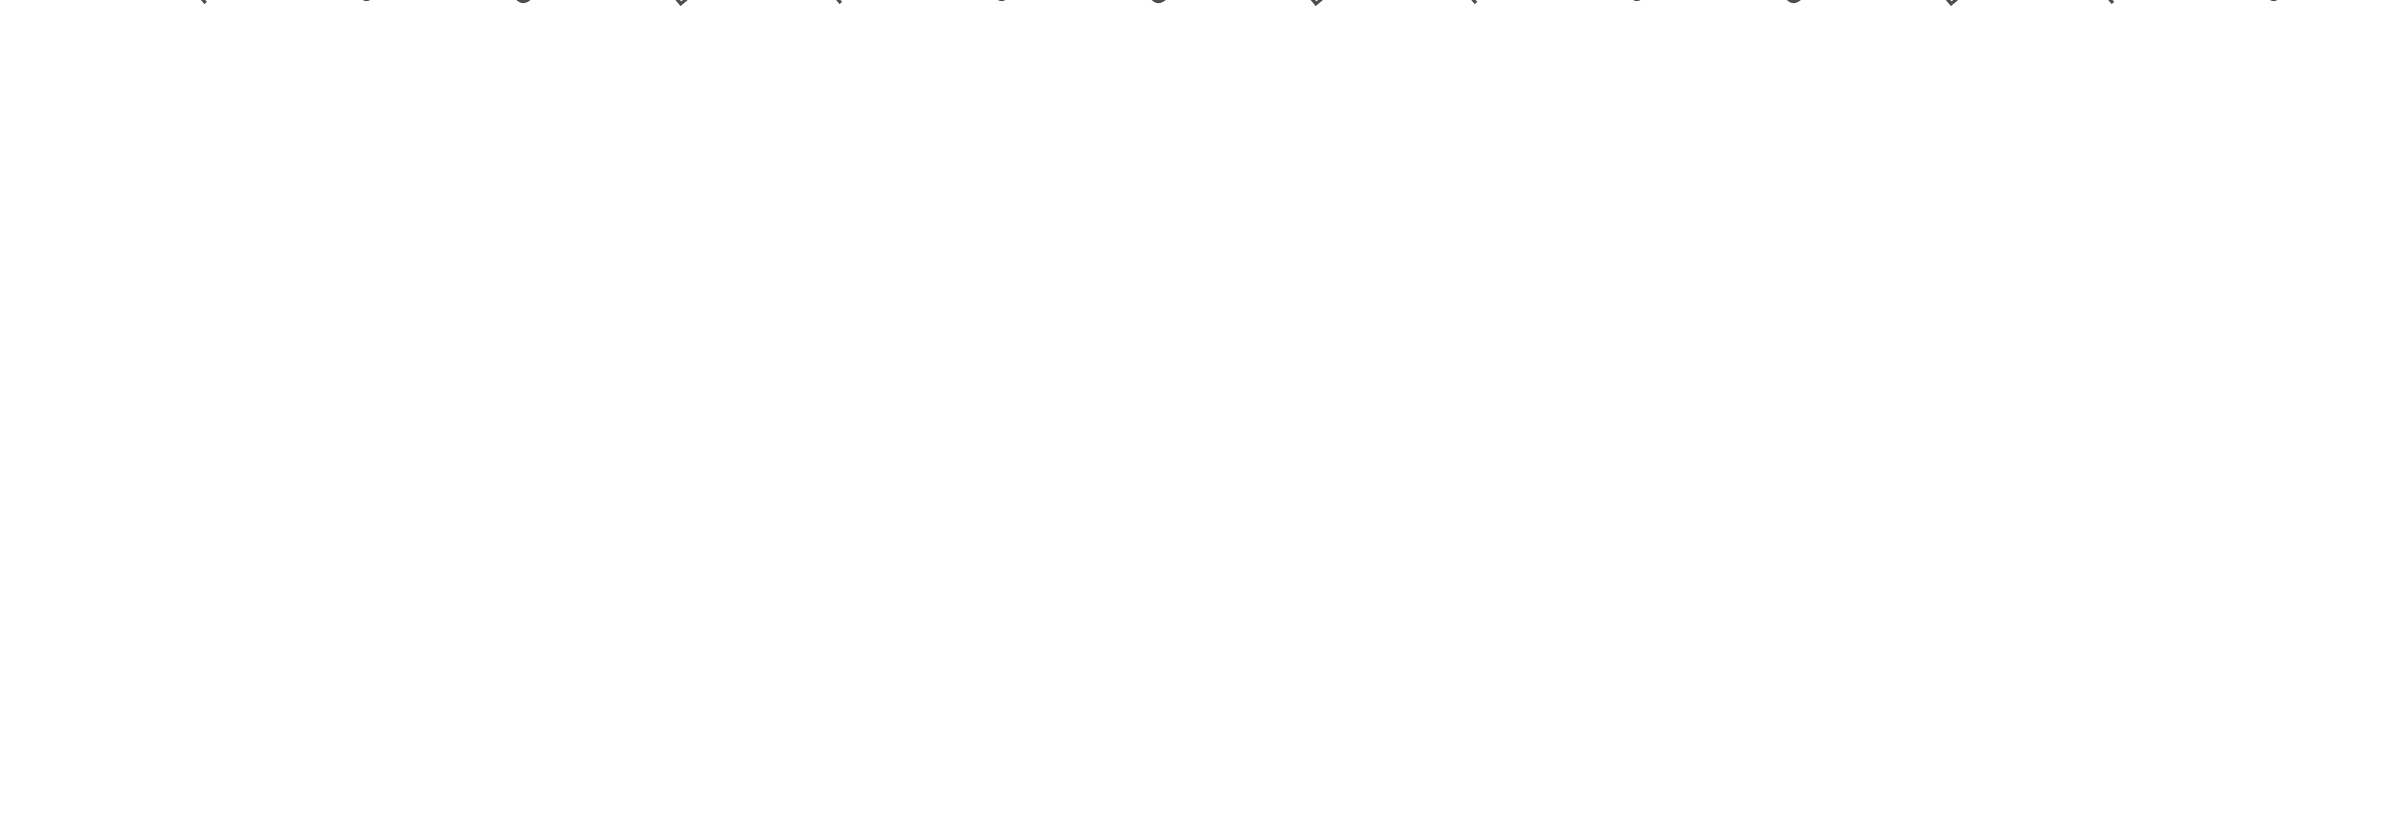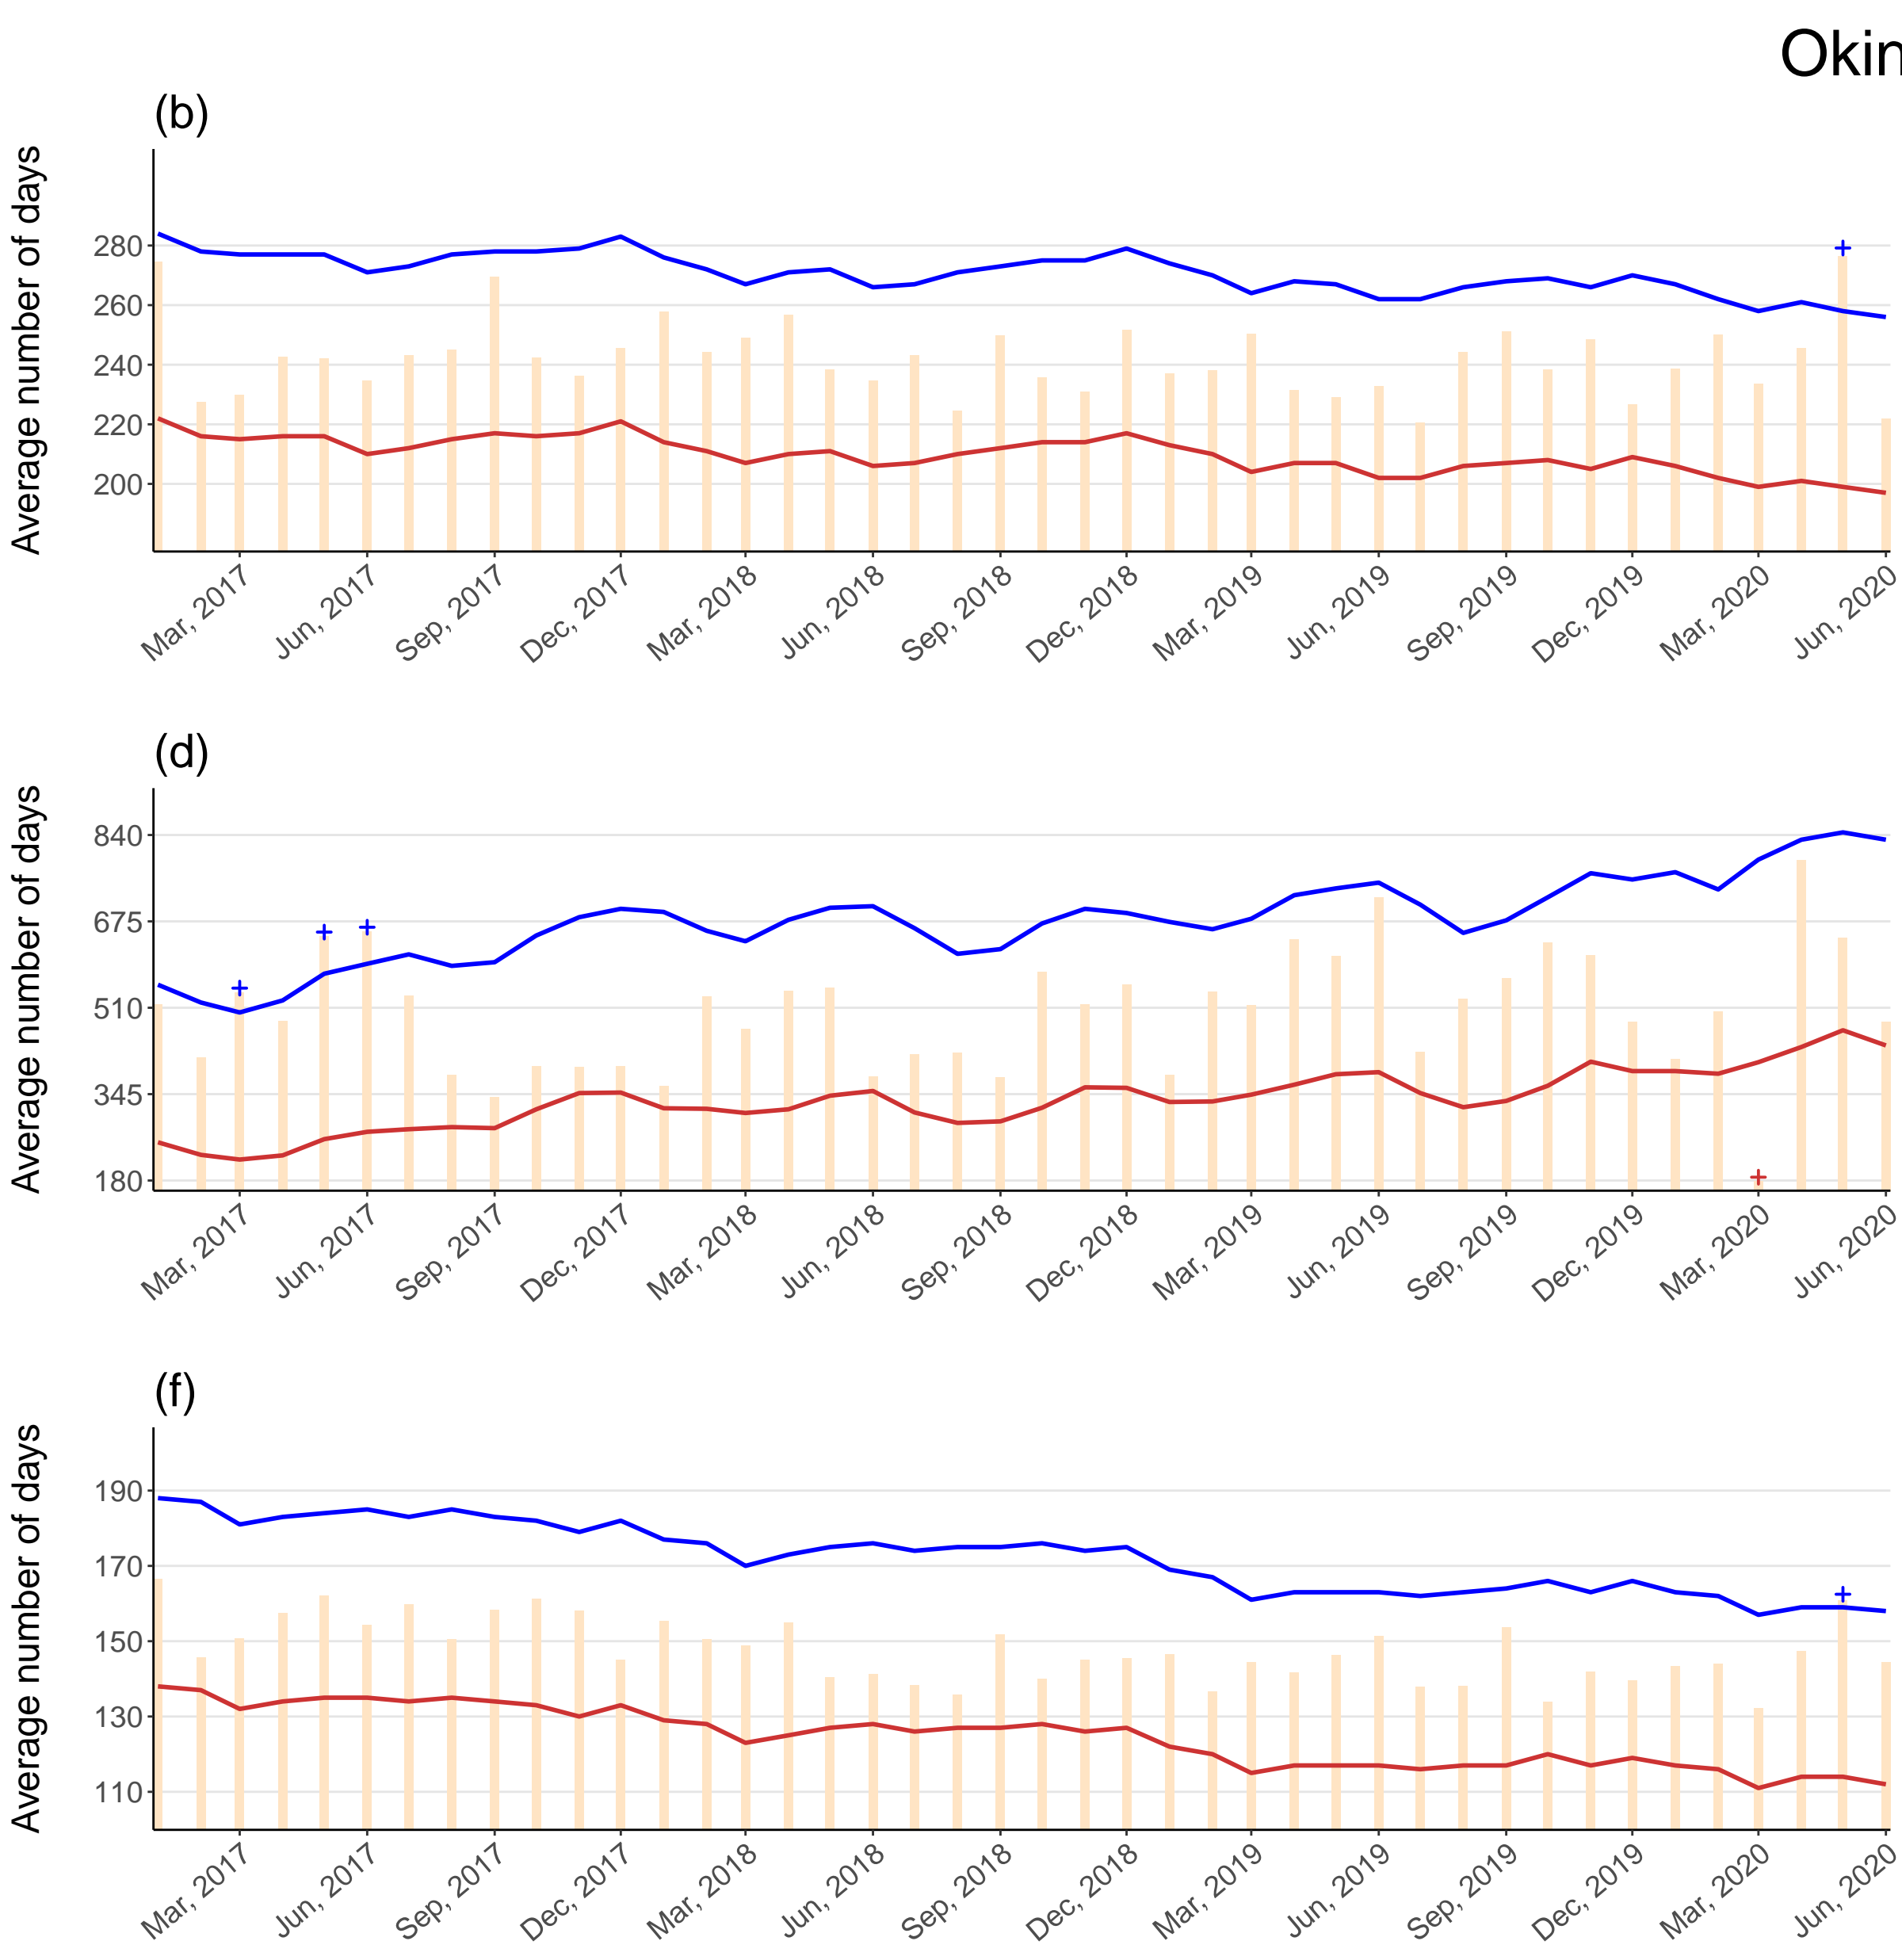

# Okinawa

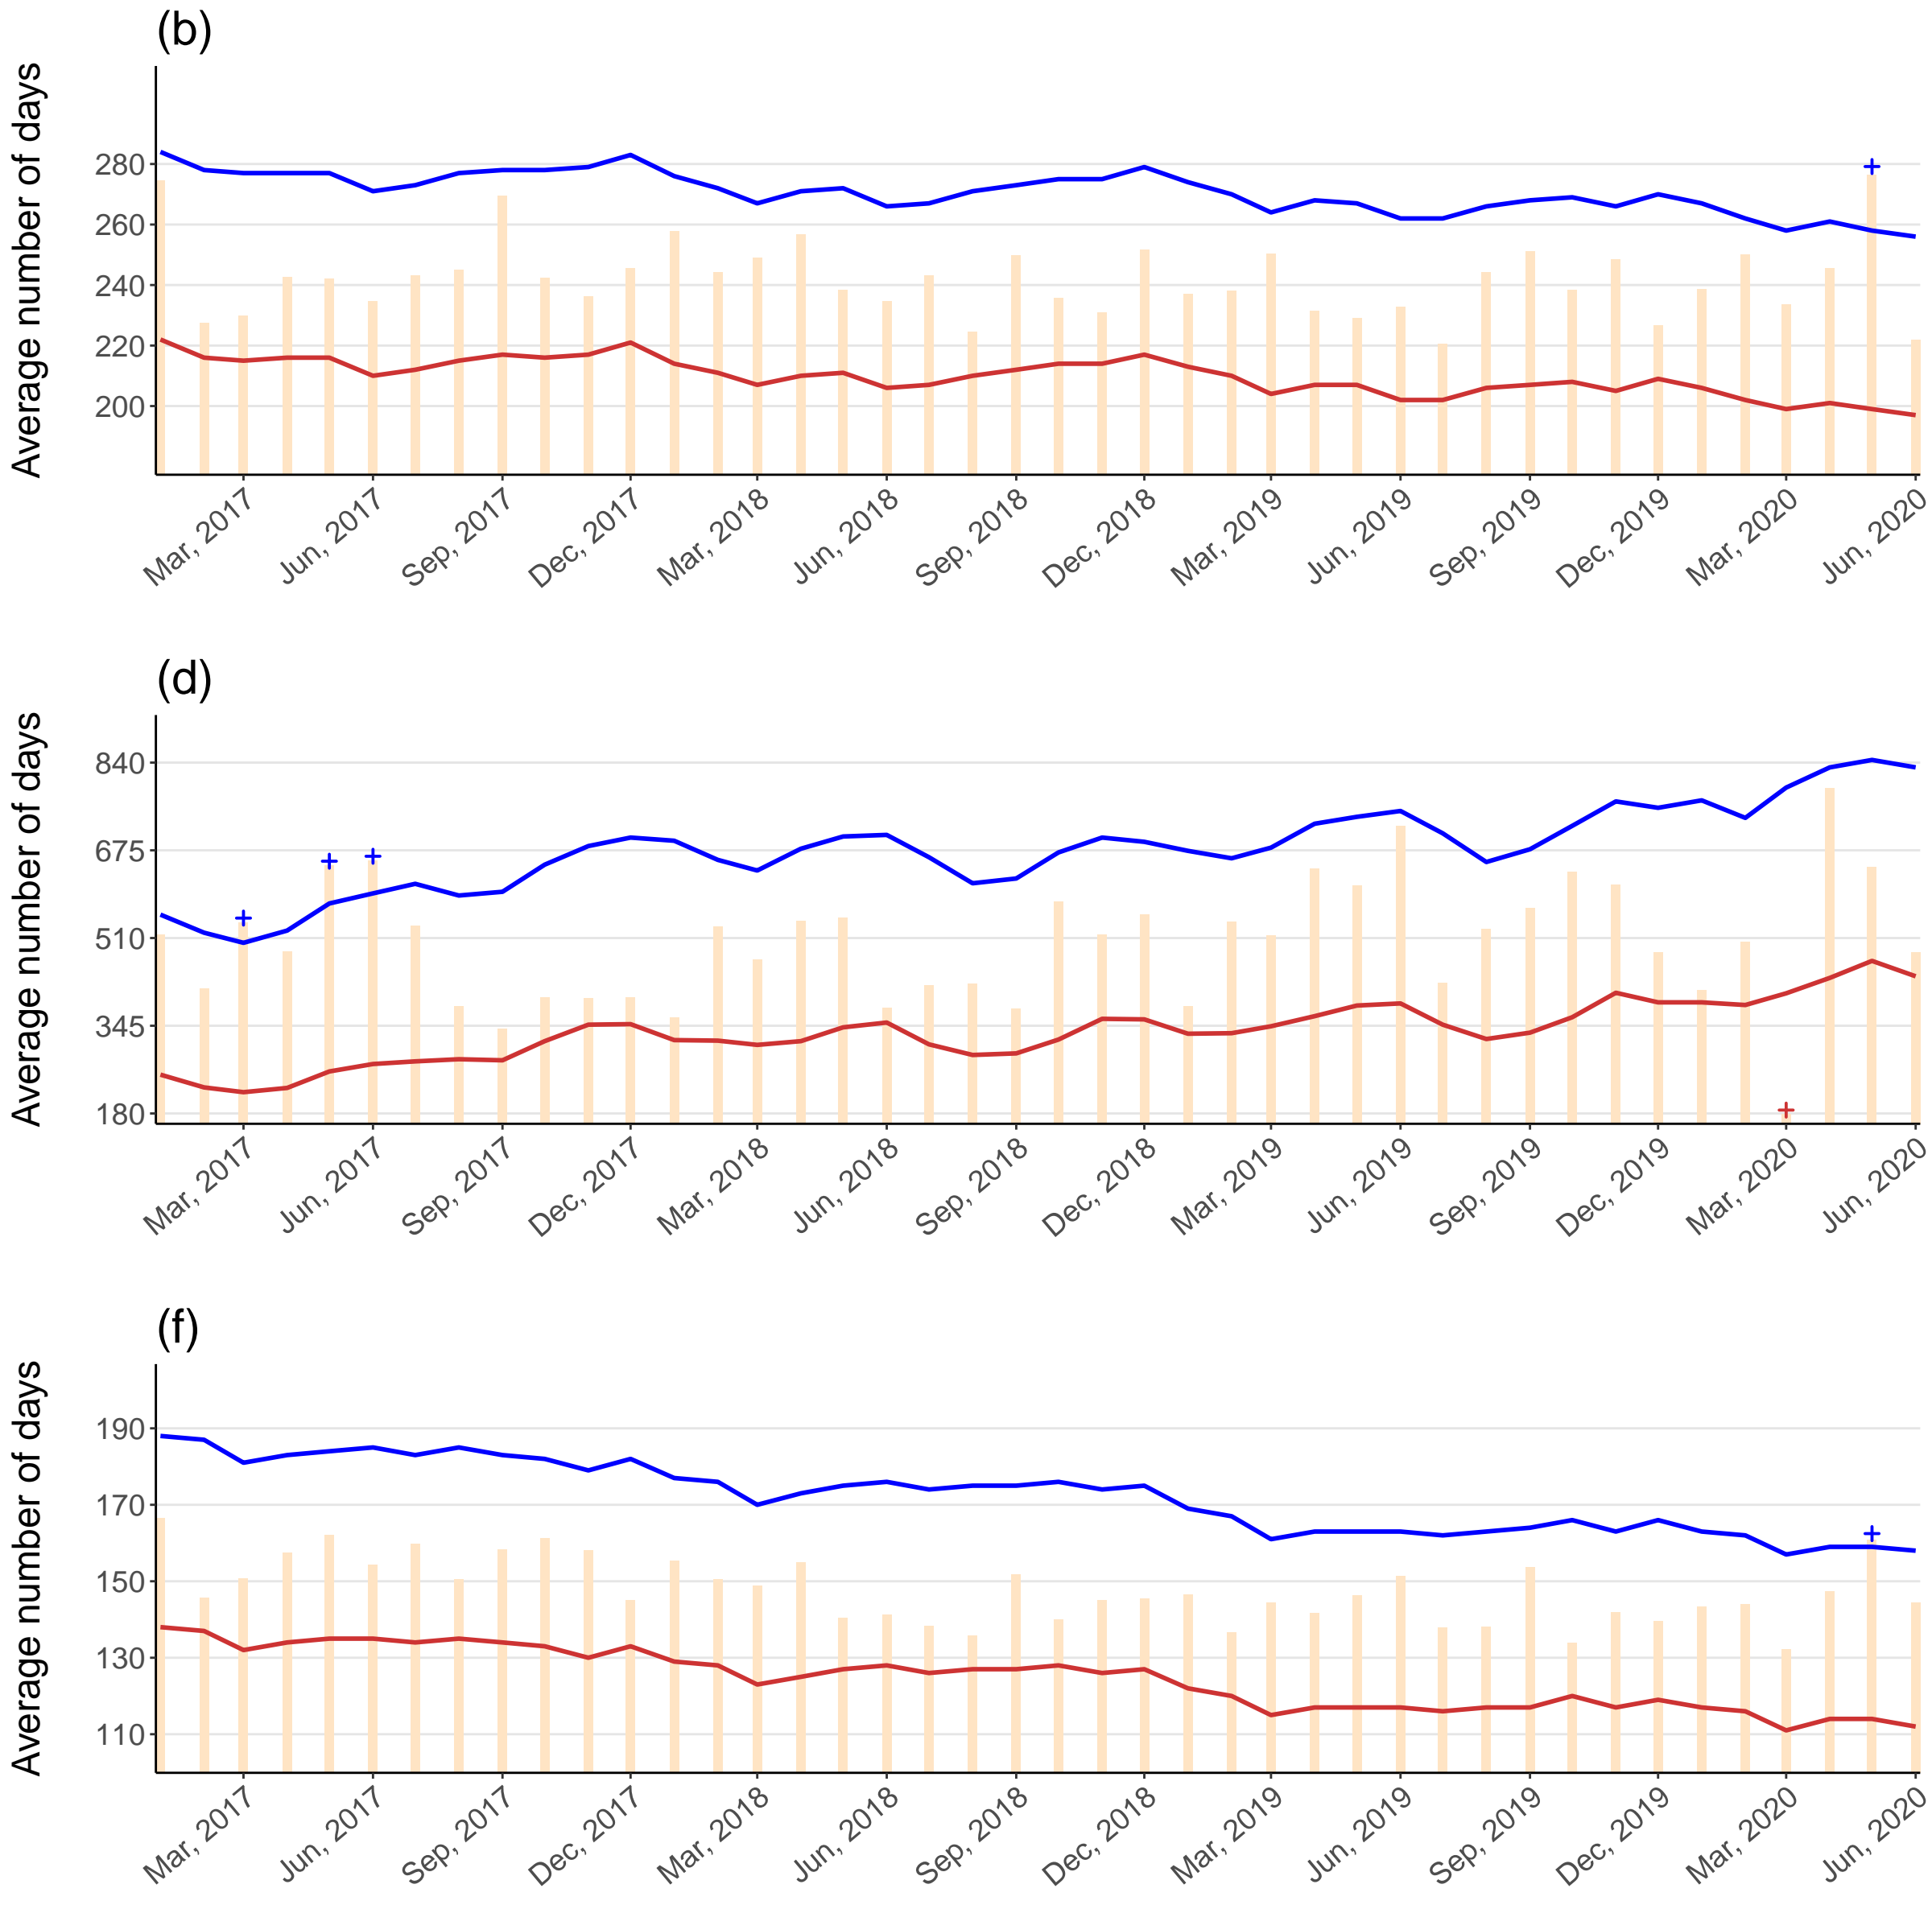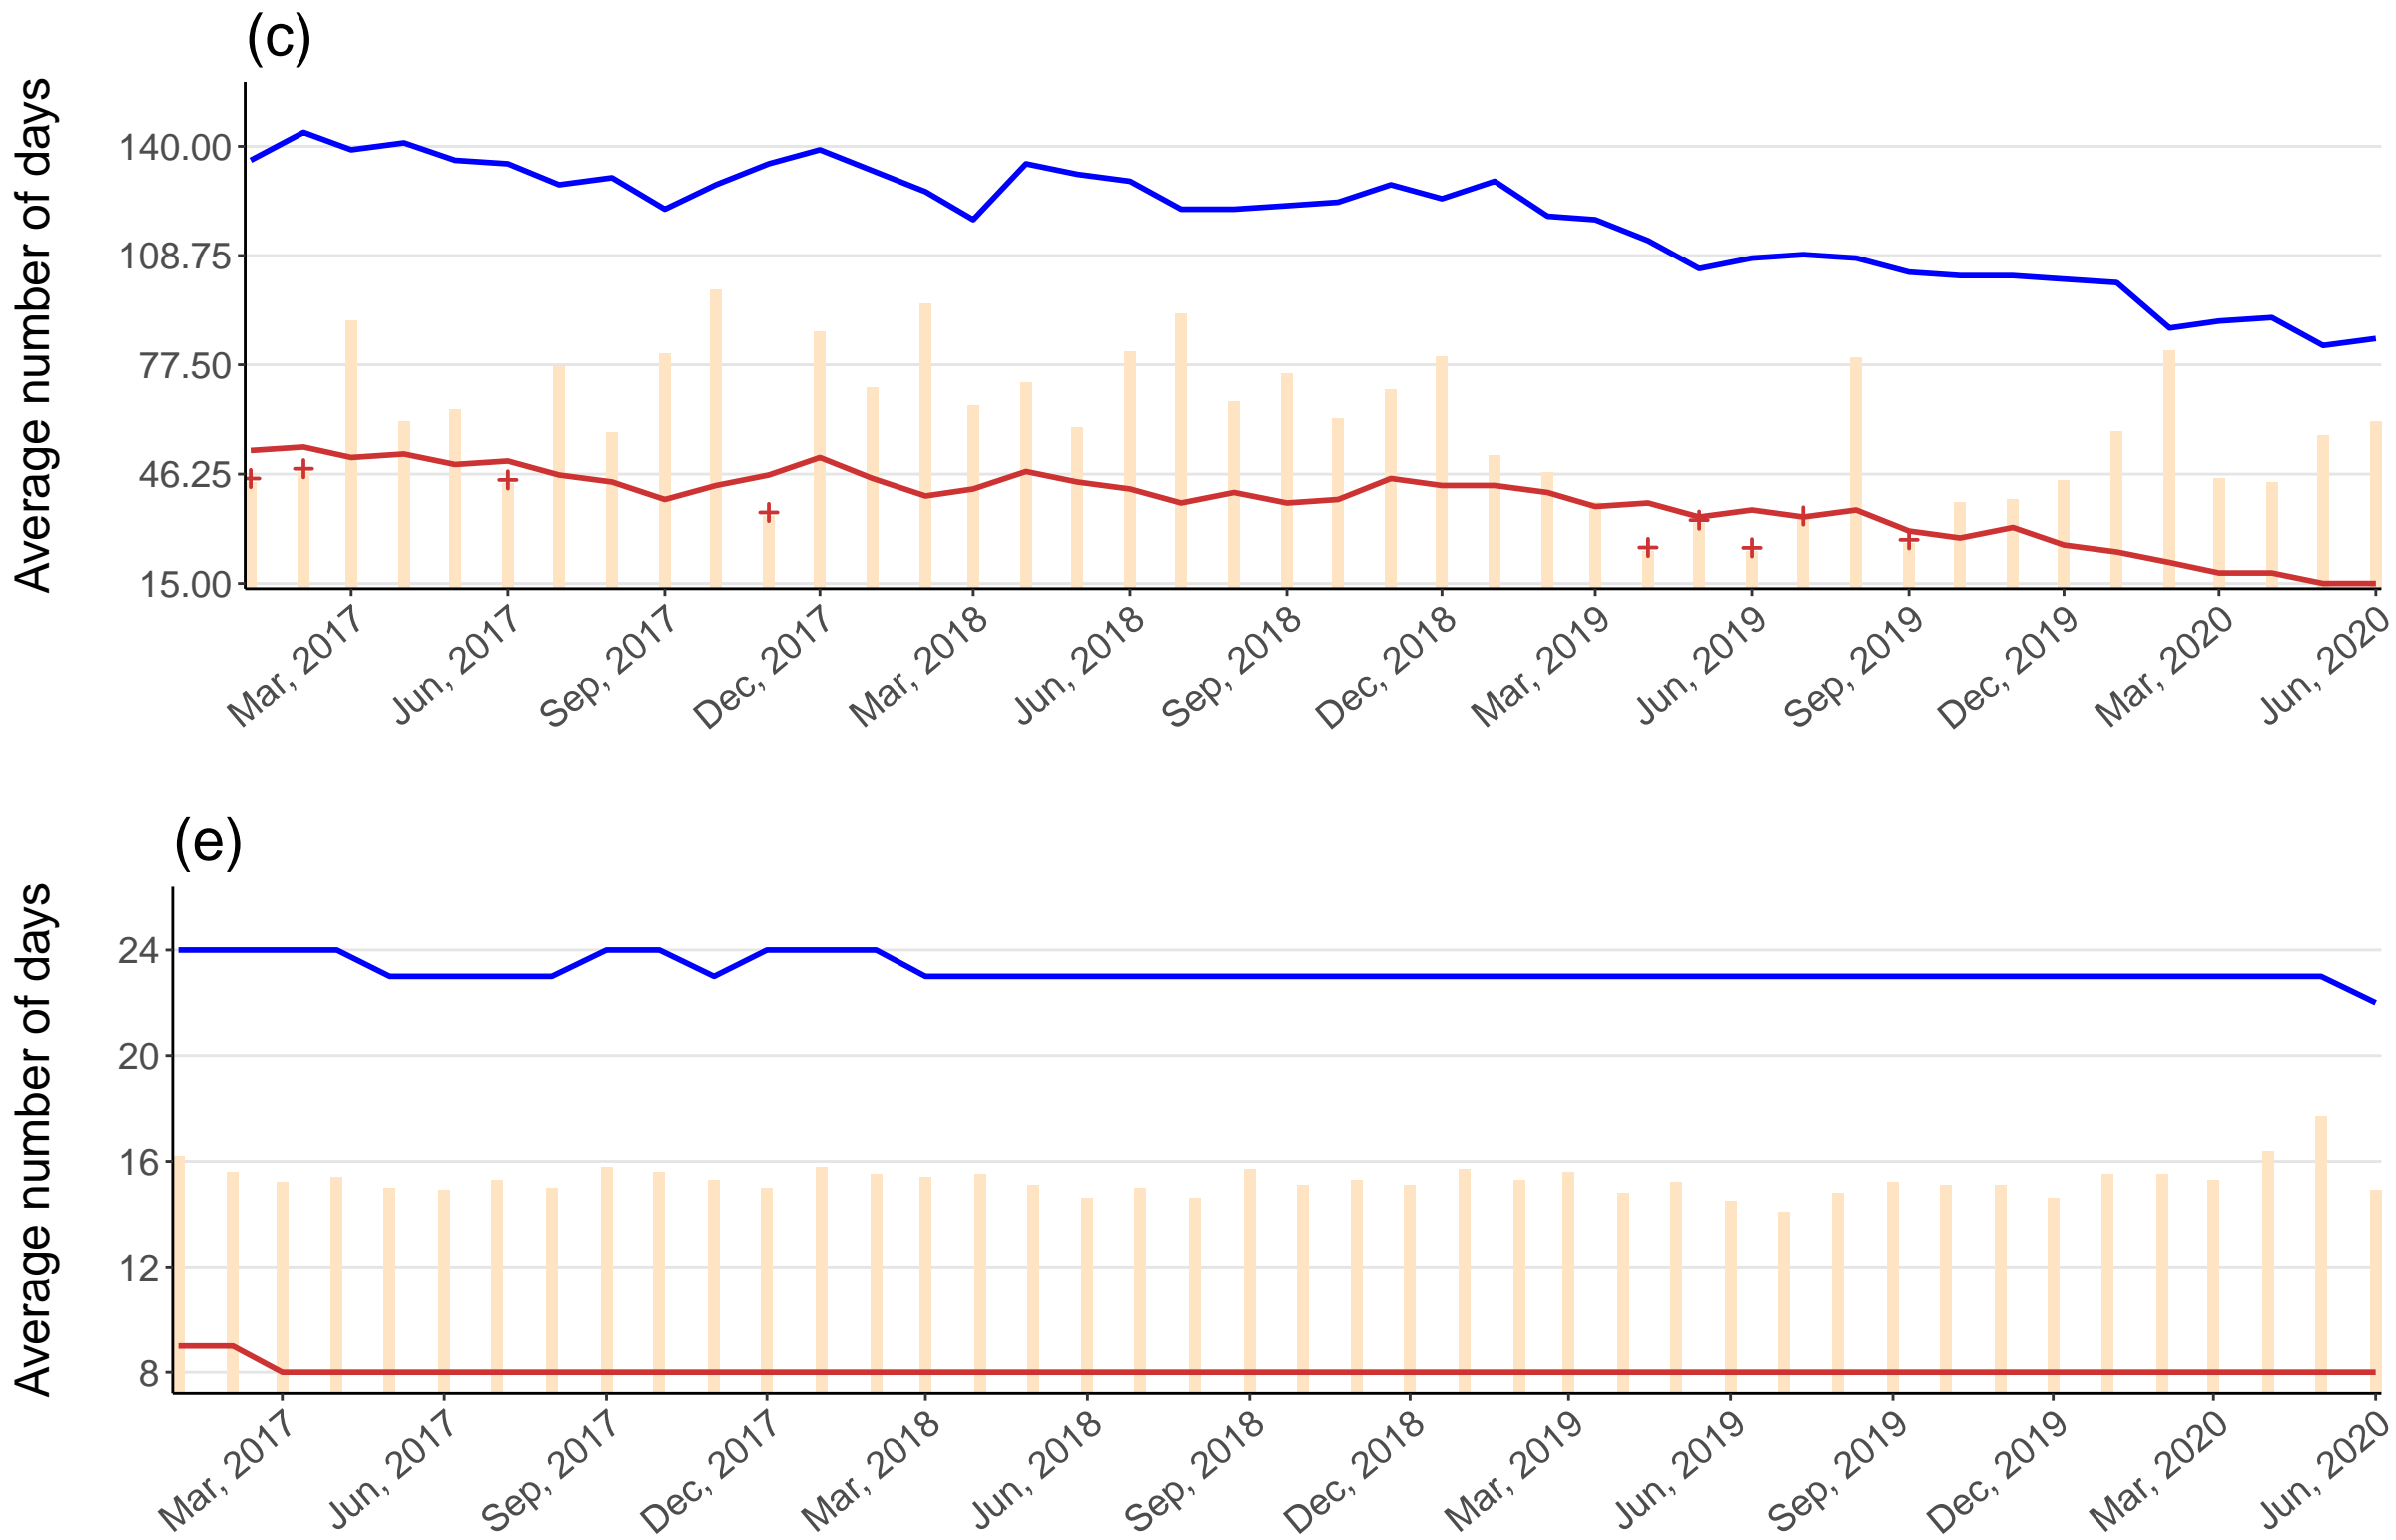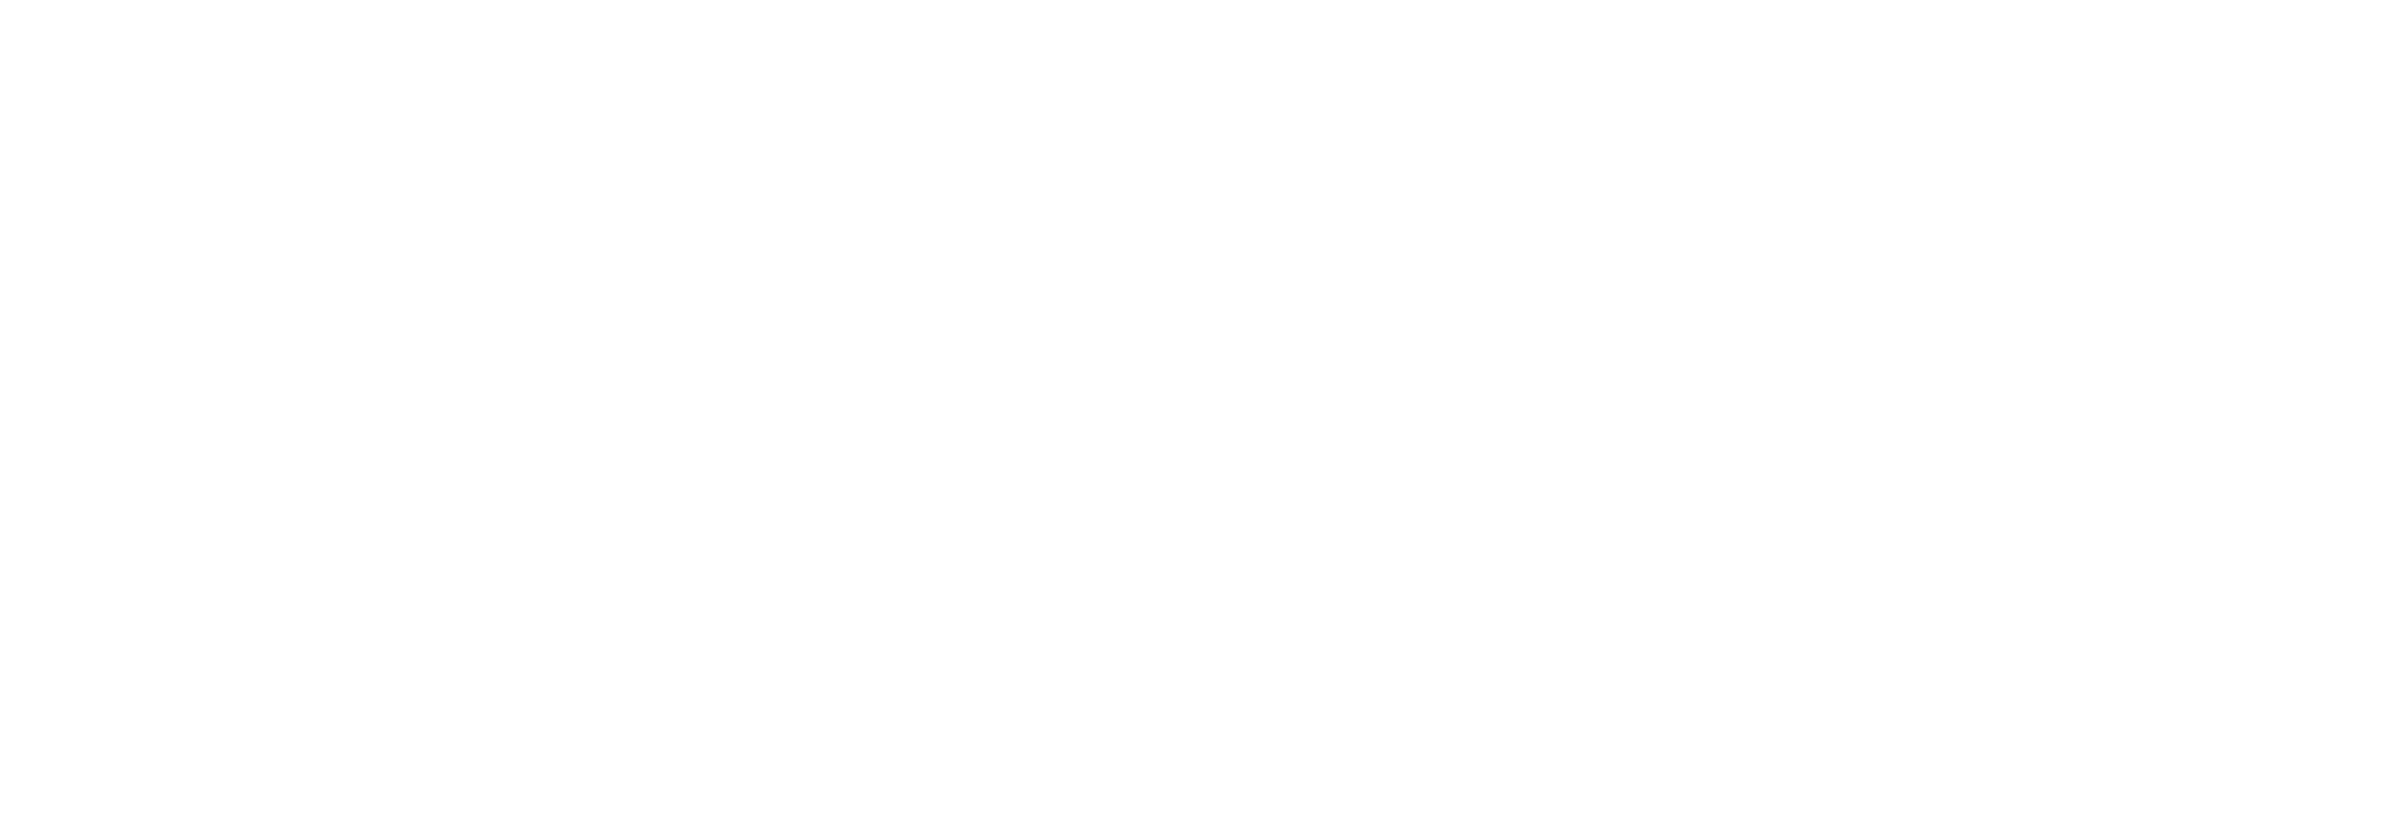

Supplement: s1 [file s1]
