# Supplementary figures and images for: Trends in Healthcare Access in Japan during the First Wave of the COVID-19 Pandemic, up to June 2020
Source: MDPI journal article supplement (doi:10.3390/ijerph18063271), 2021-03-22

Pearson's correlation coefficients = 0.8265

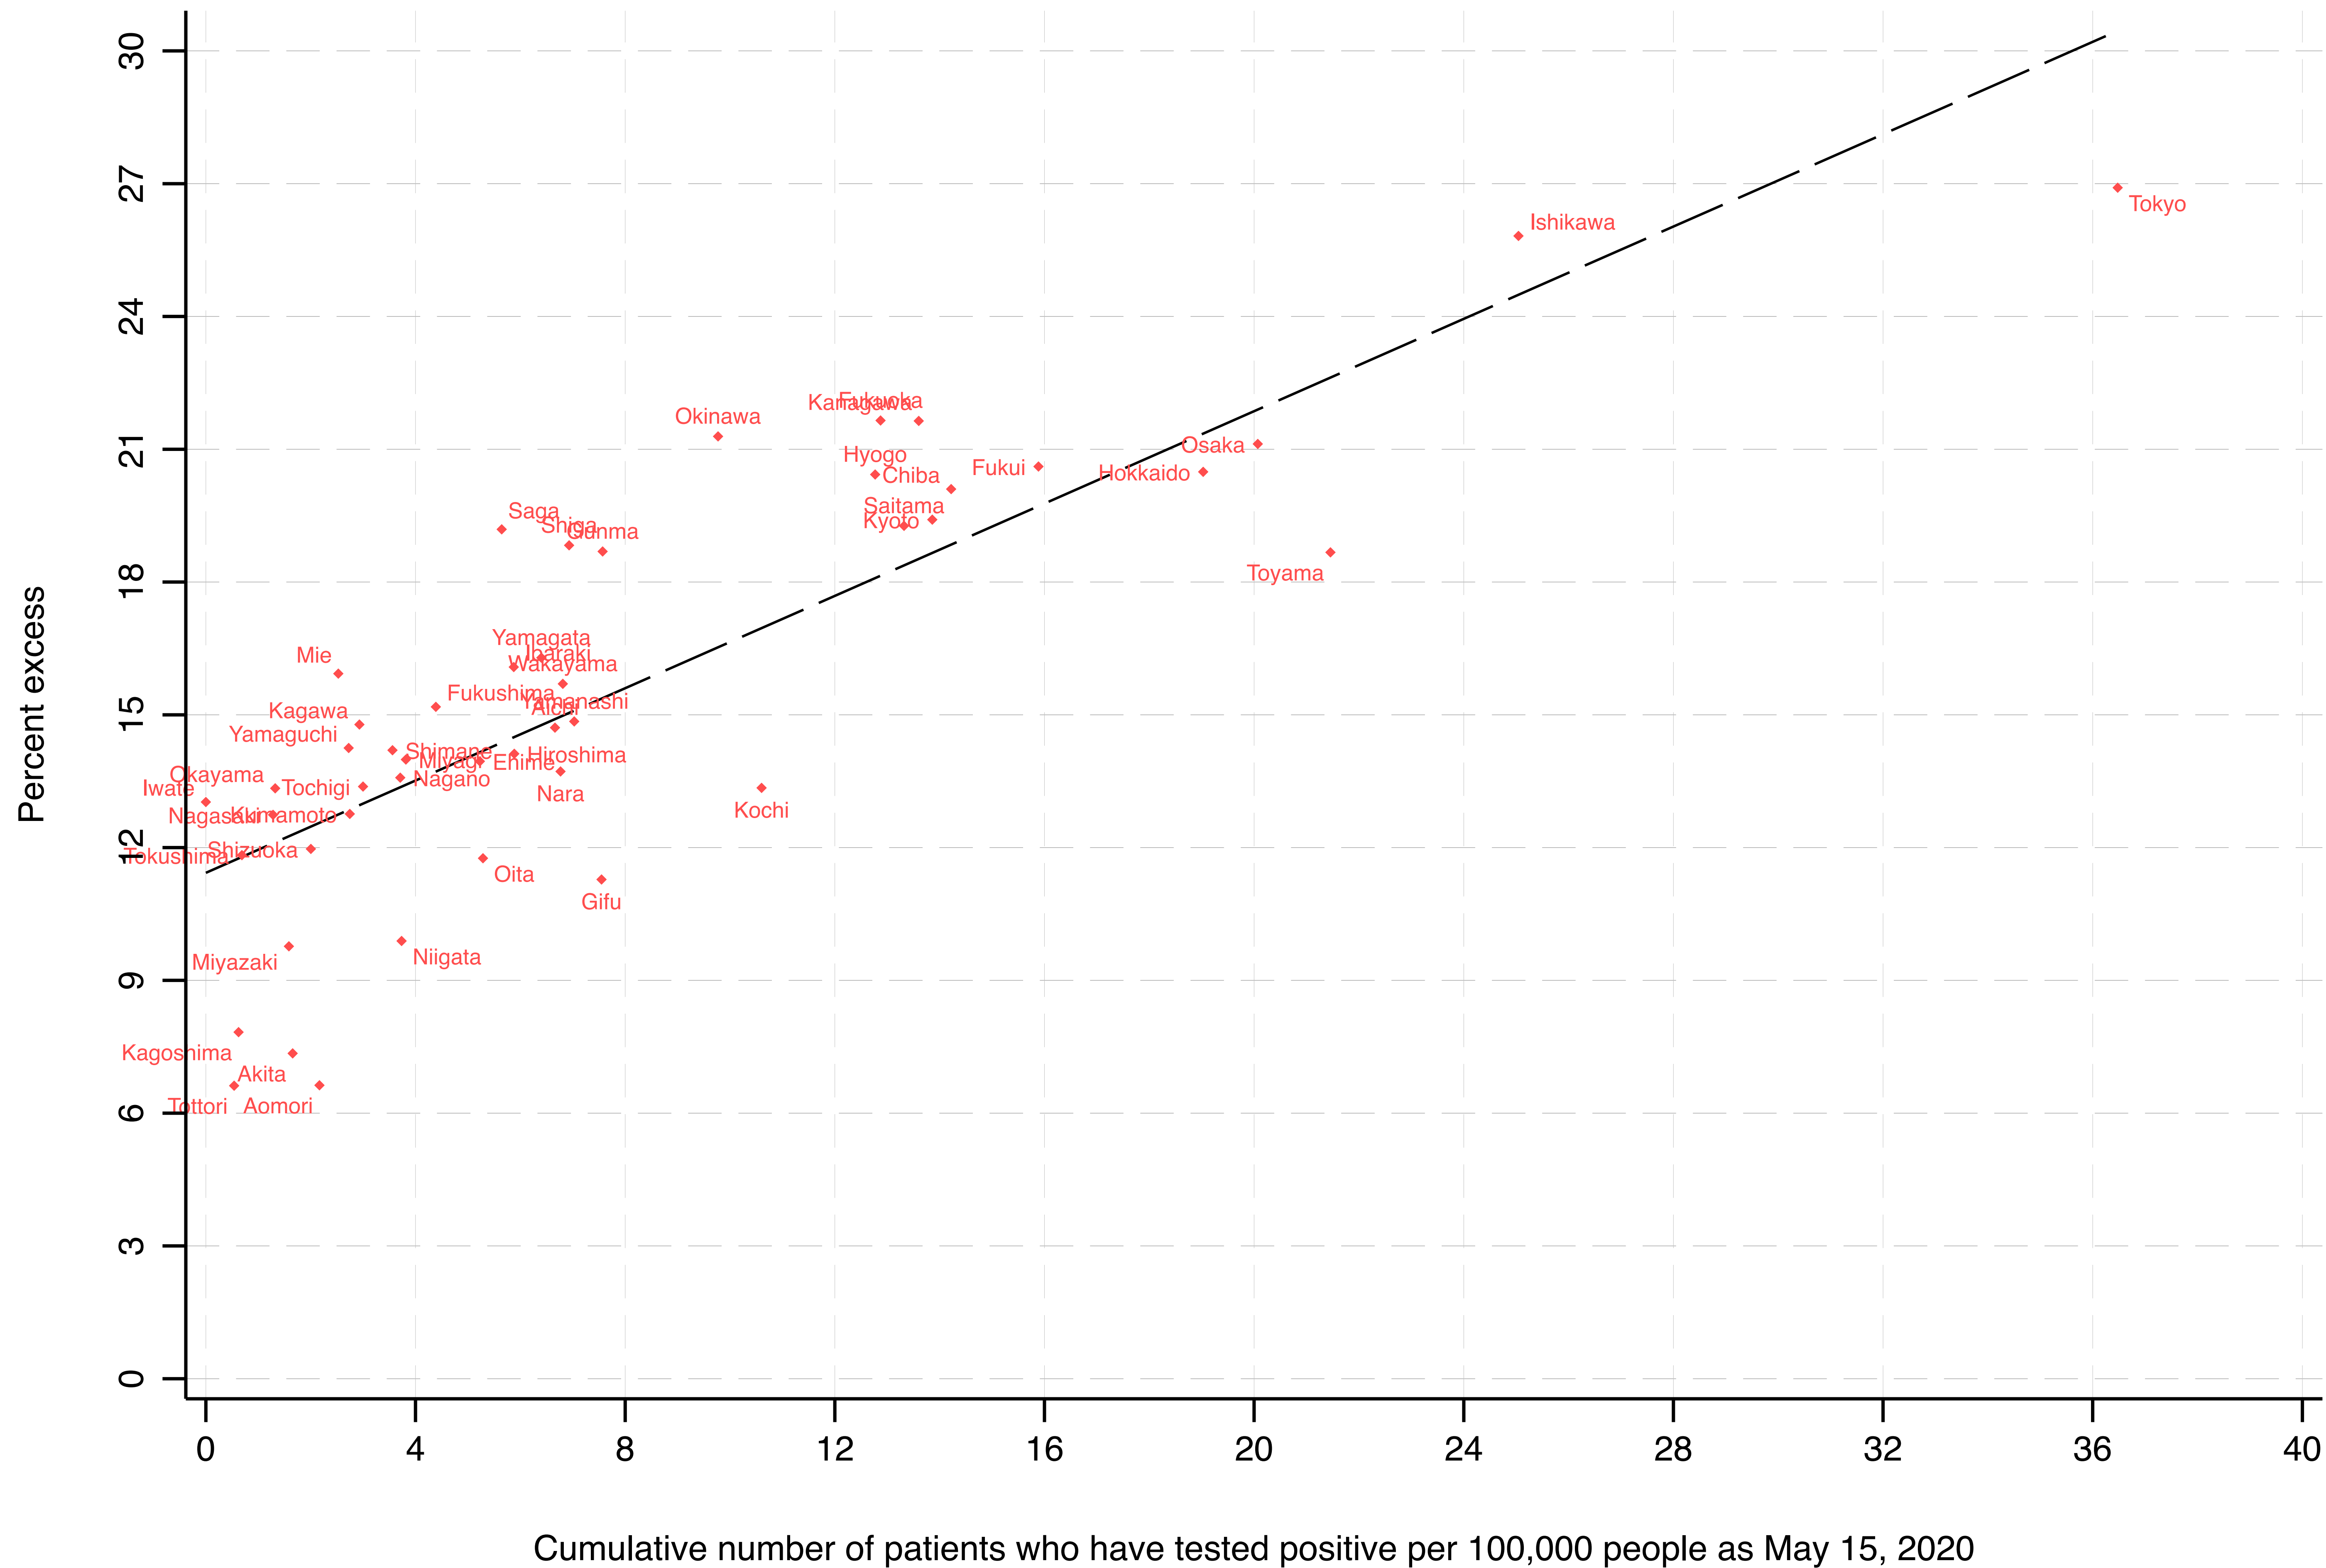

Supplement: s1 [file s1]

Pearson's correlation coefficients = 0.8711

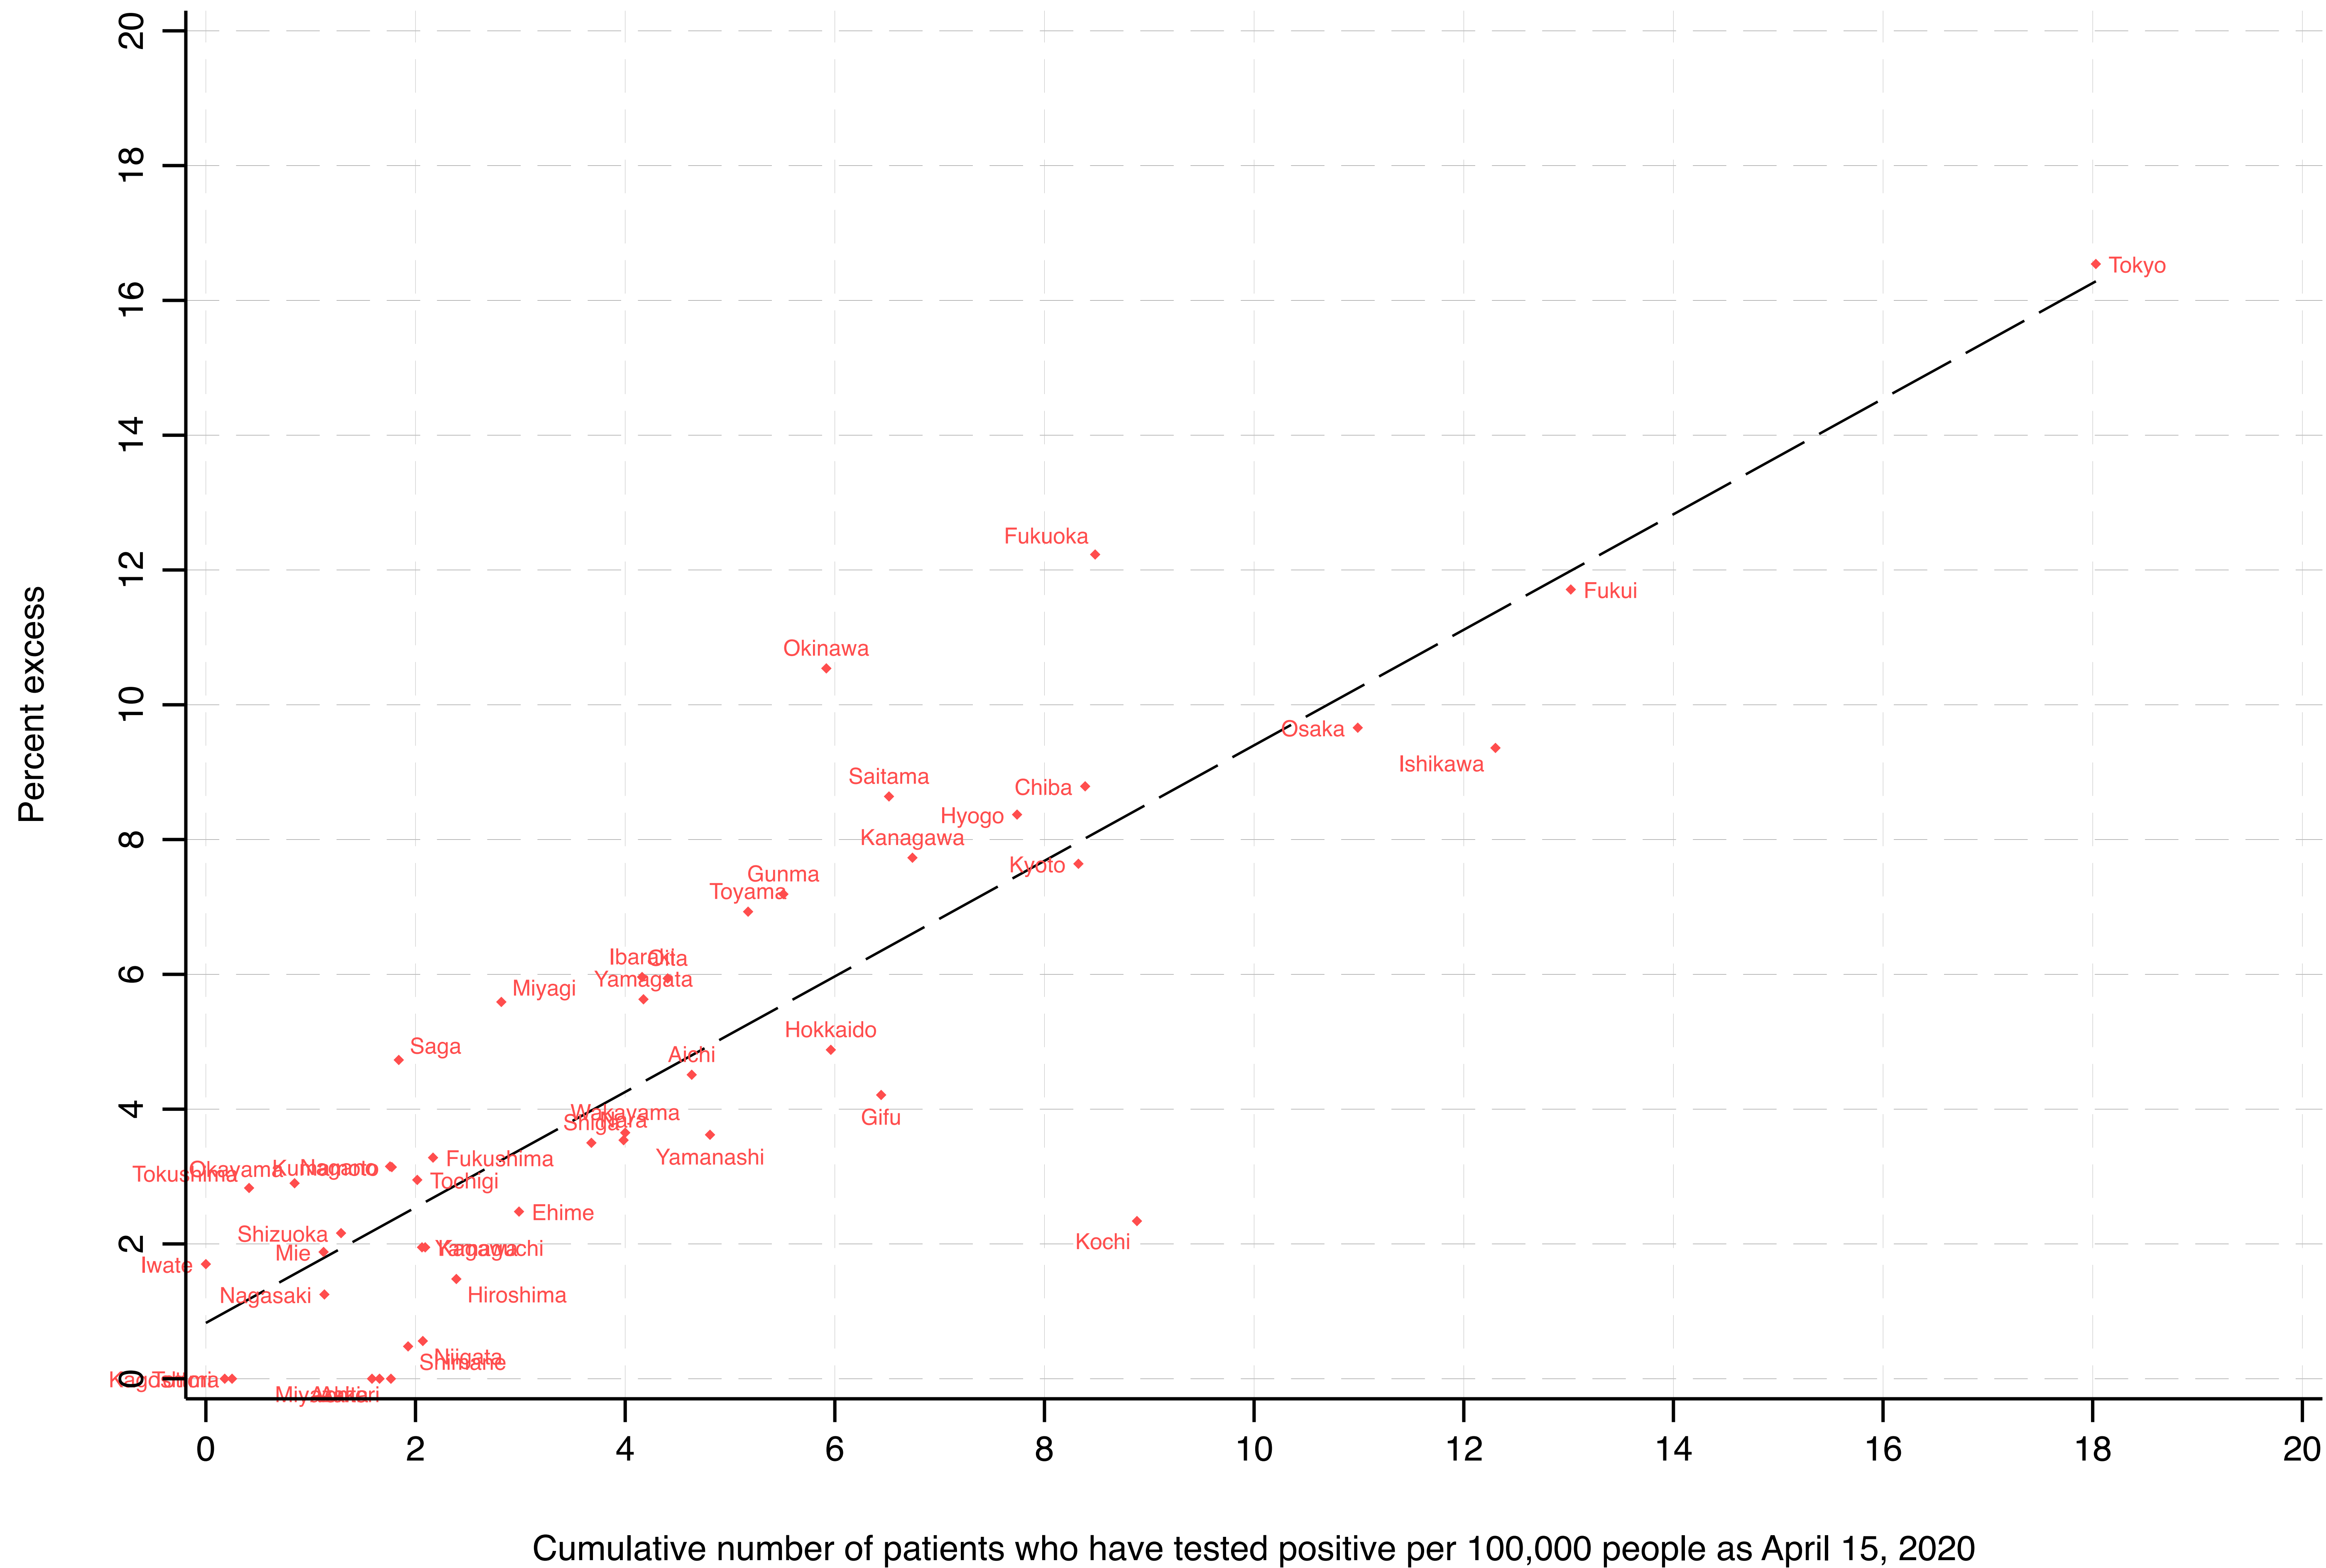

Supplement: s1 [file s1]

Pearson's correlation coefficients = 0.7517

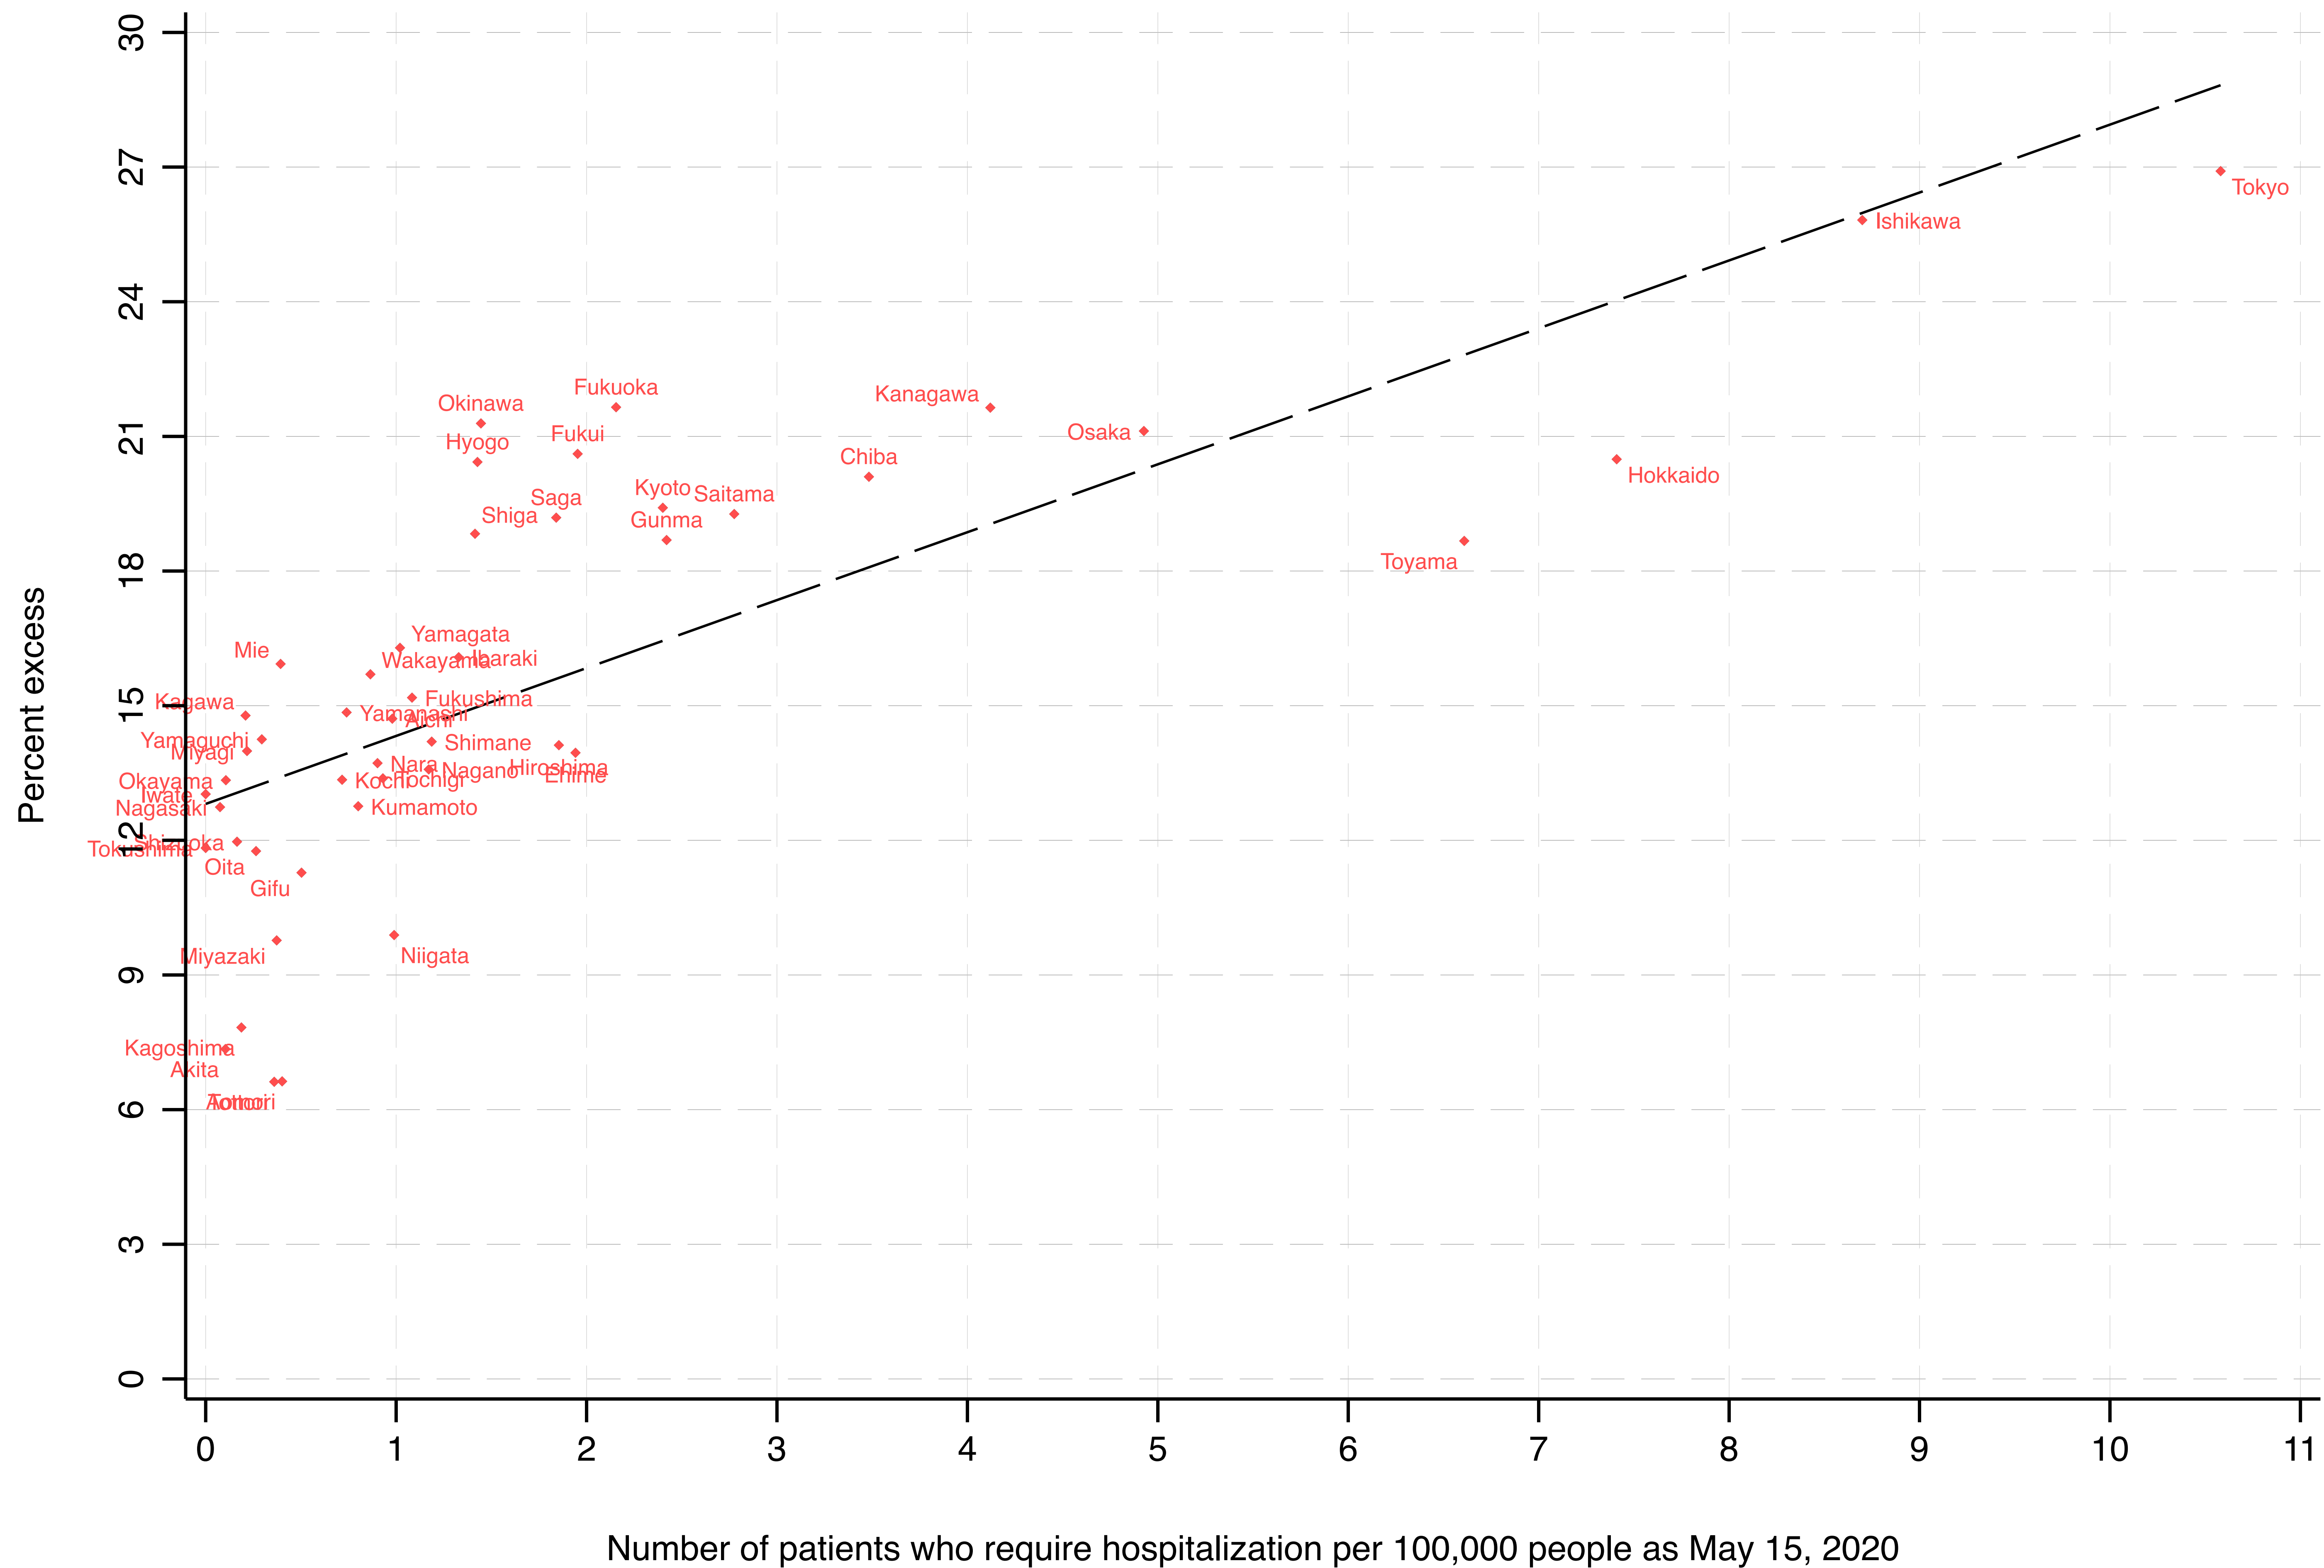

Supplement: s1 [file s1]

Pearson's correlation coefficients = 0.7517

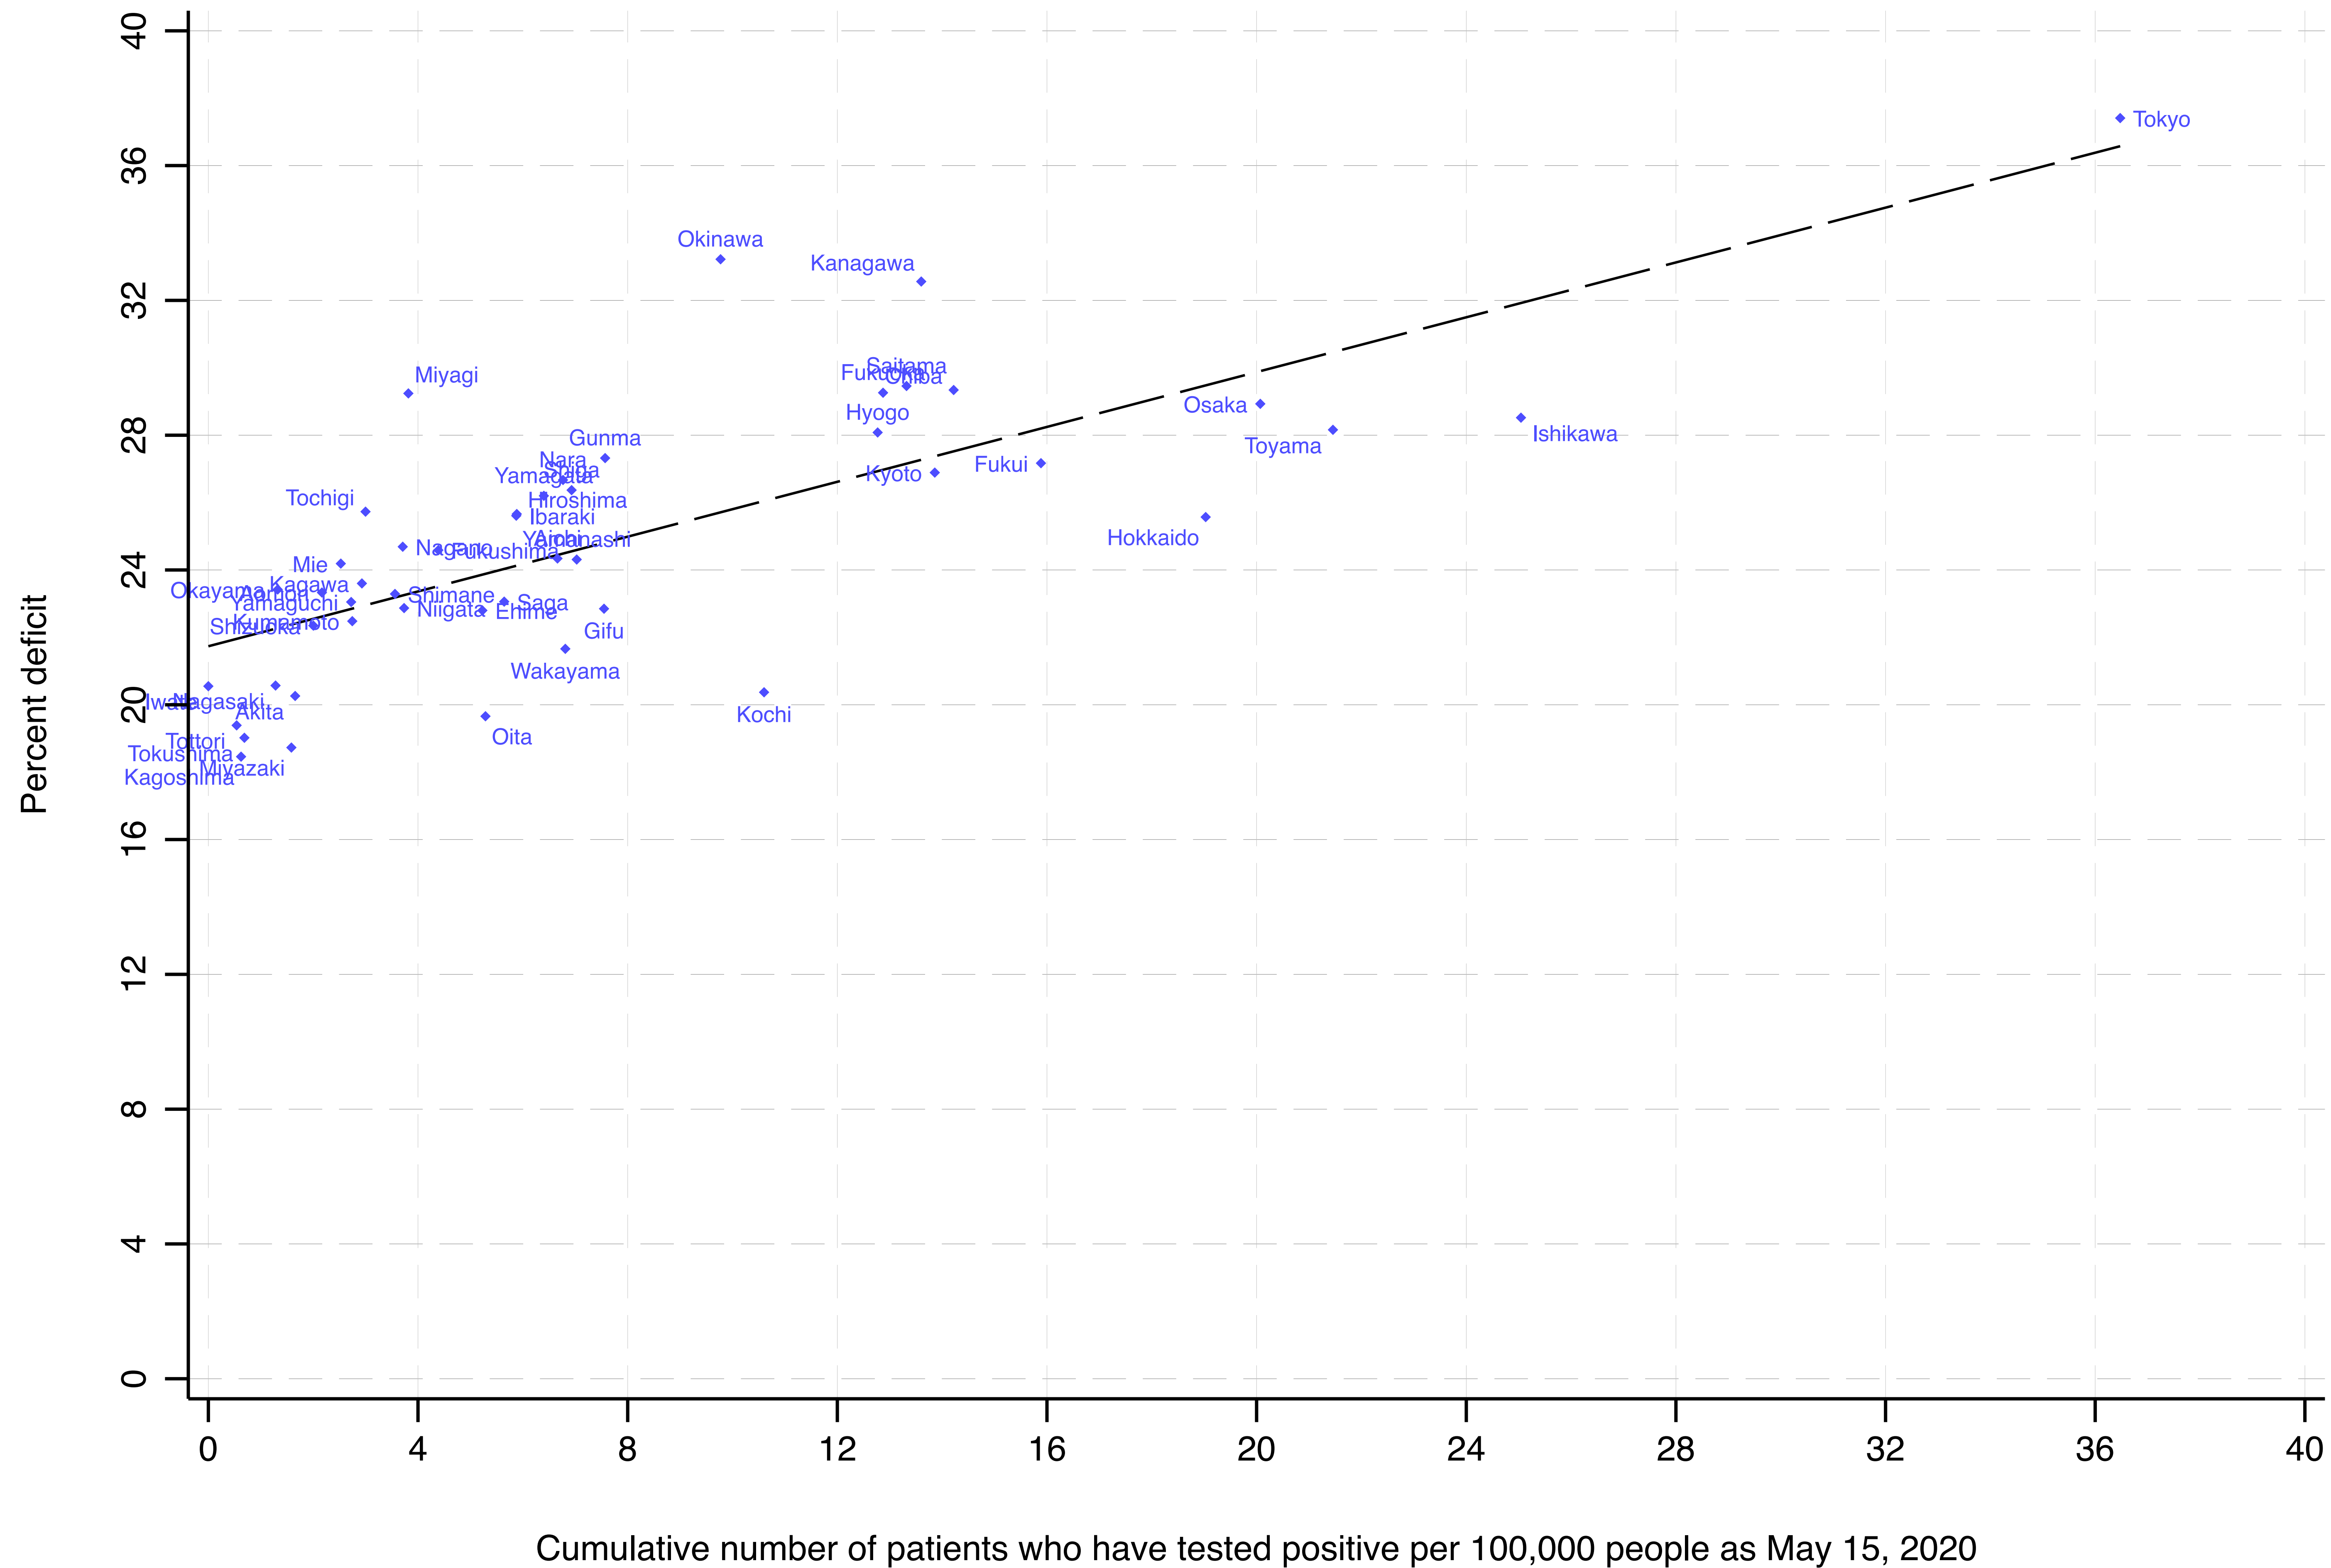

Supplement: s1 [file s1]

Pearson's correlation coefficients = 0.8325

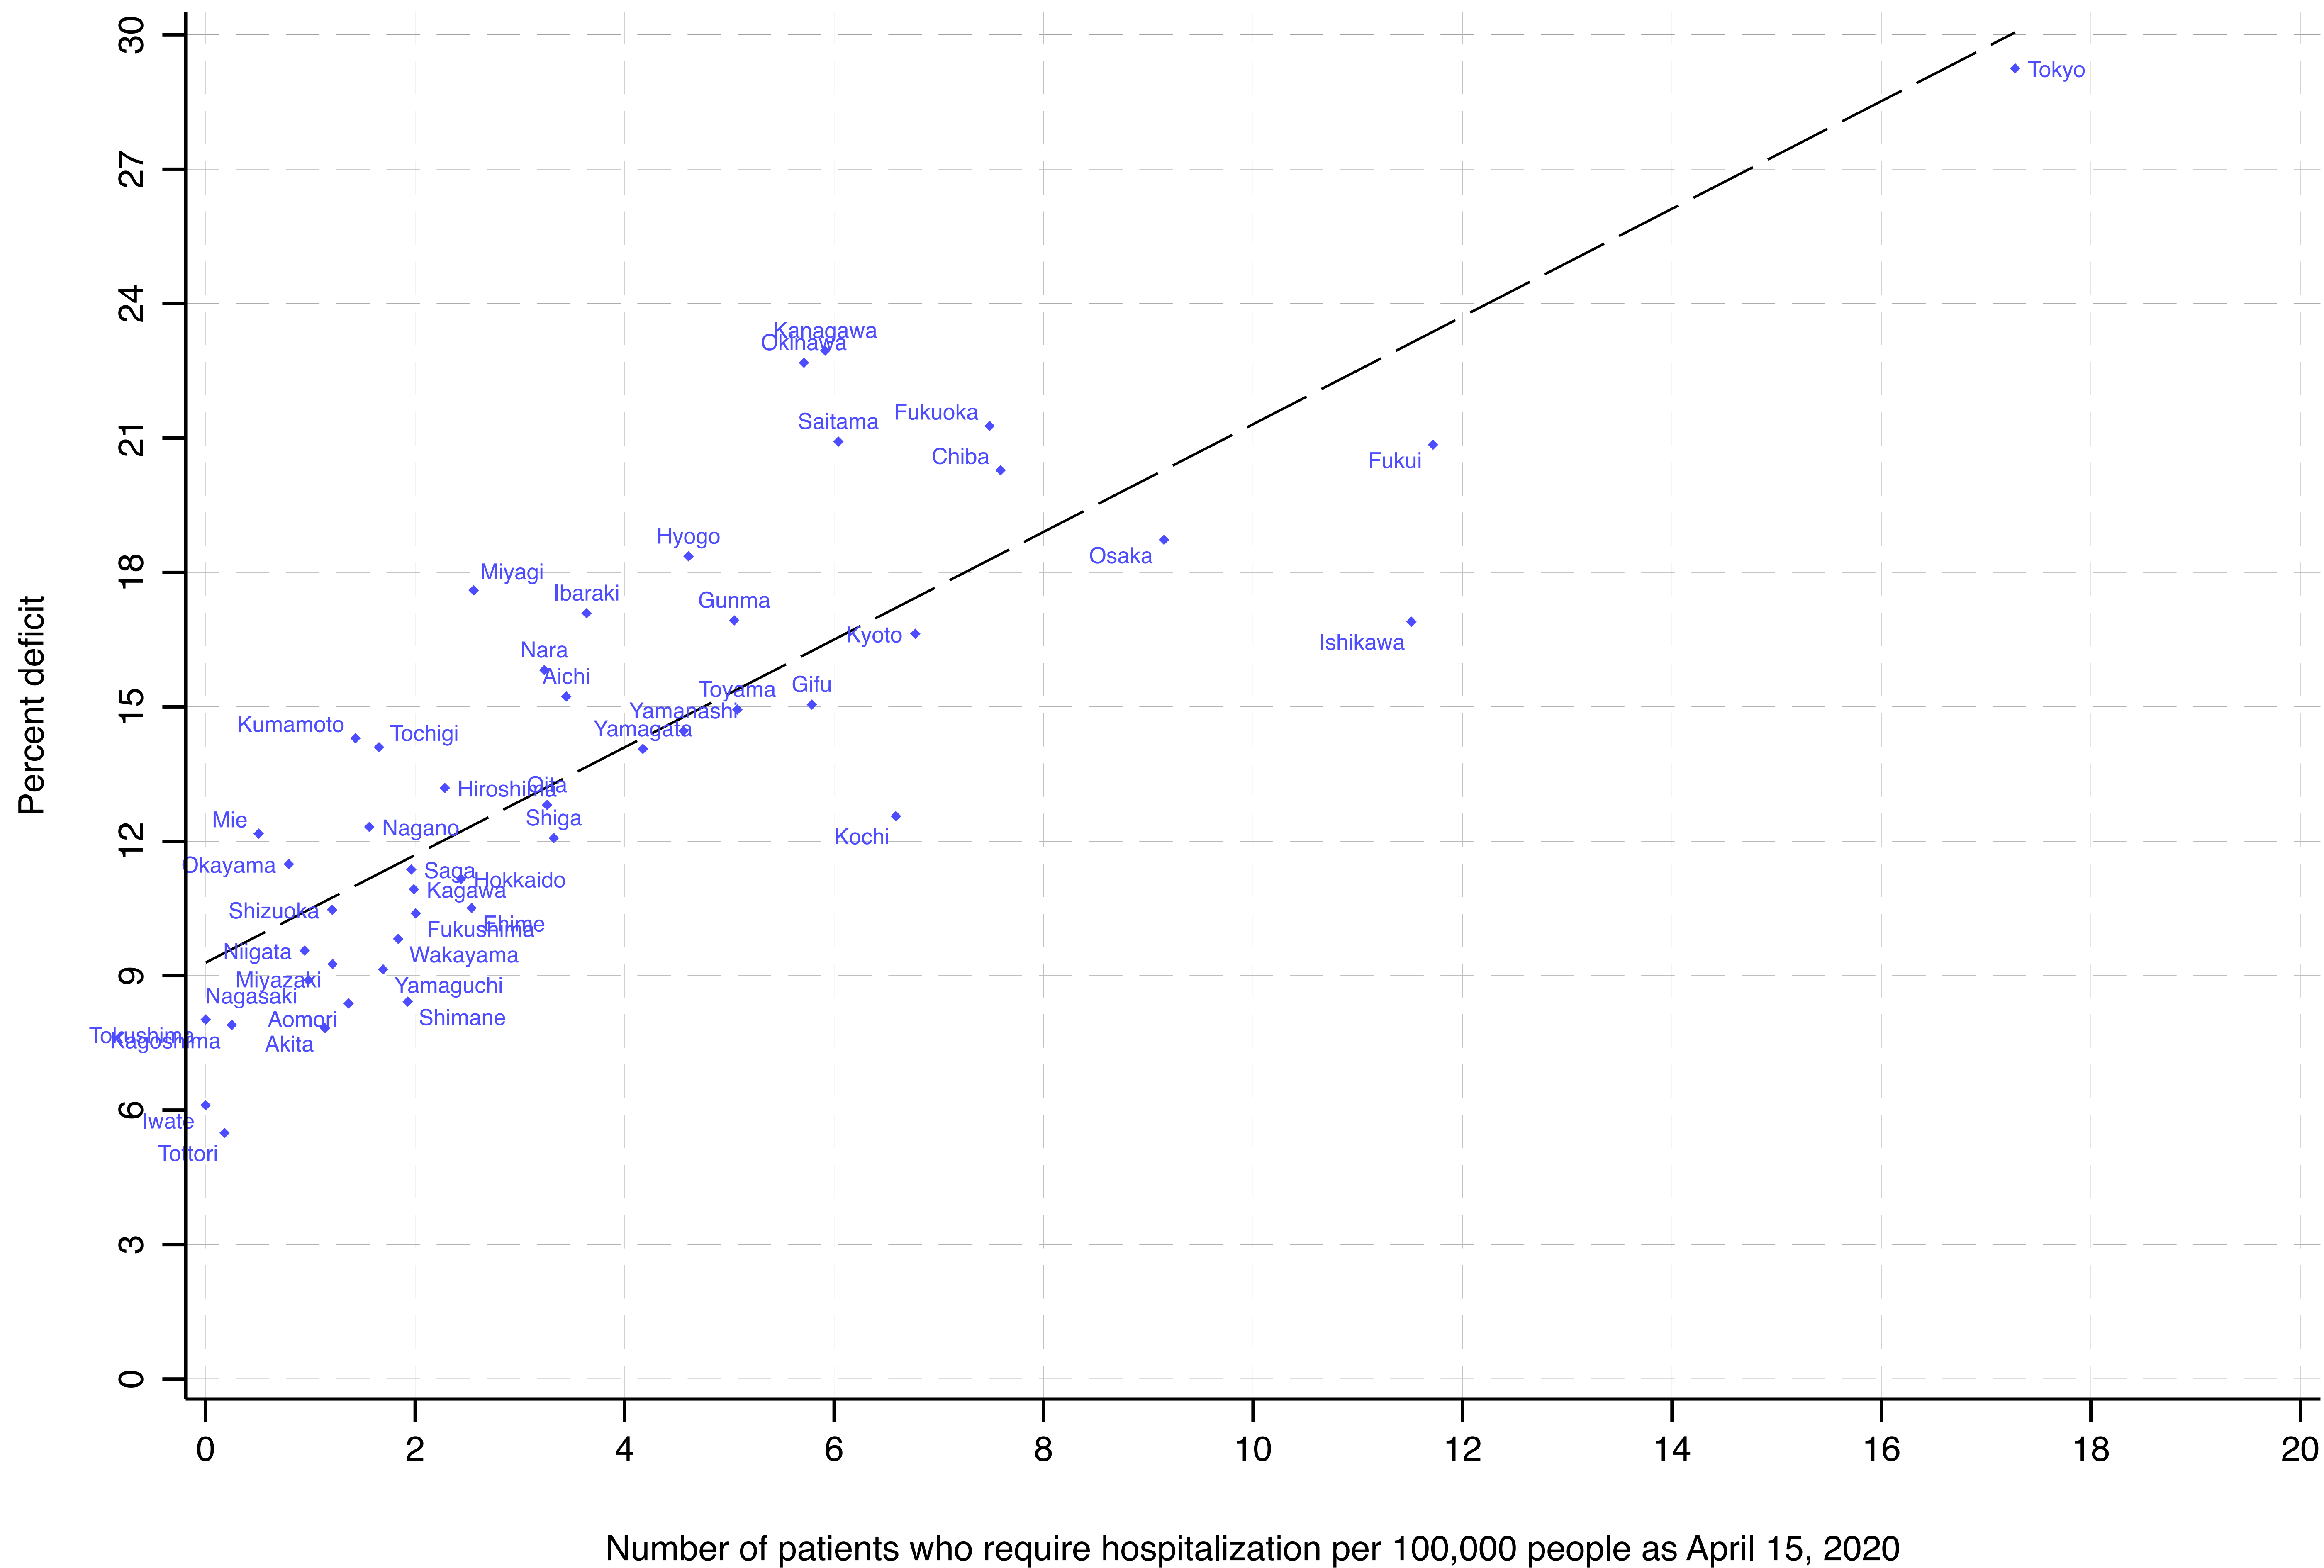

Supplement: s1 [file s1]

Pearson's correlation coefficients = 0.8121

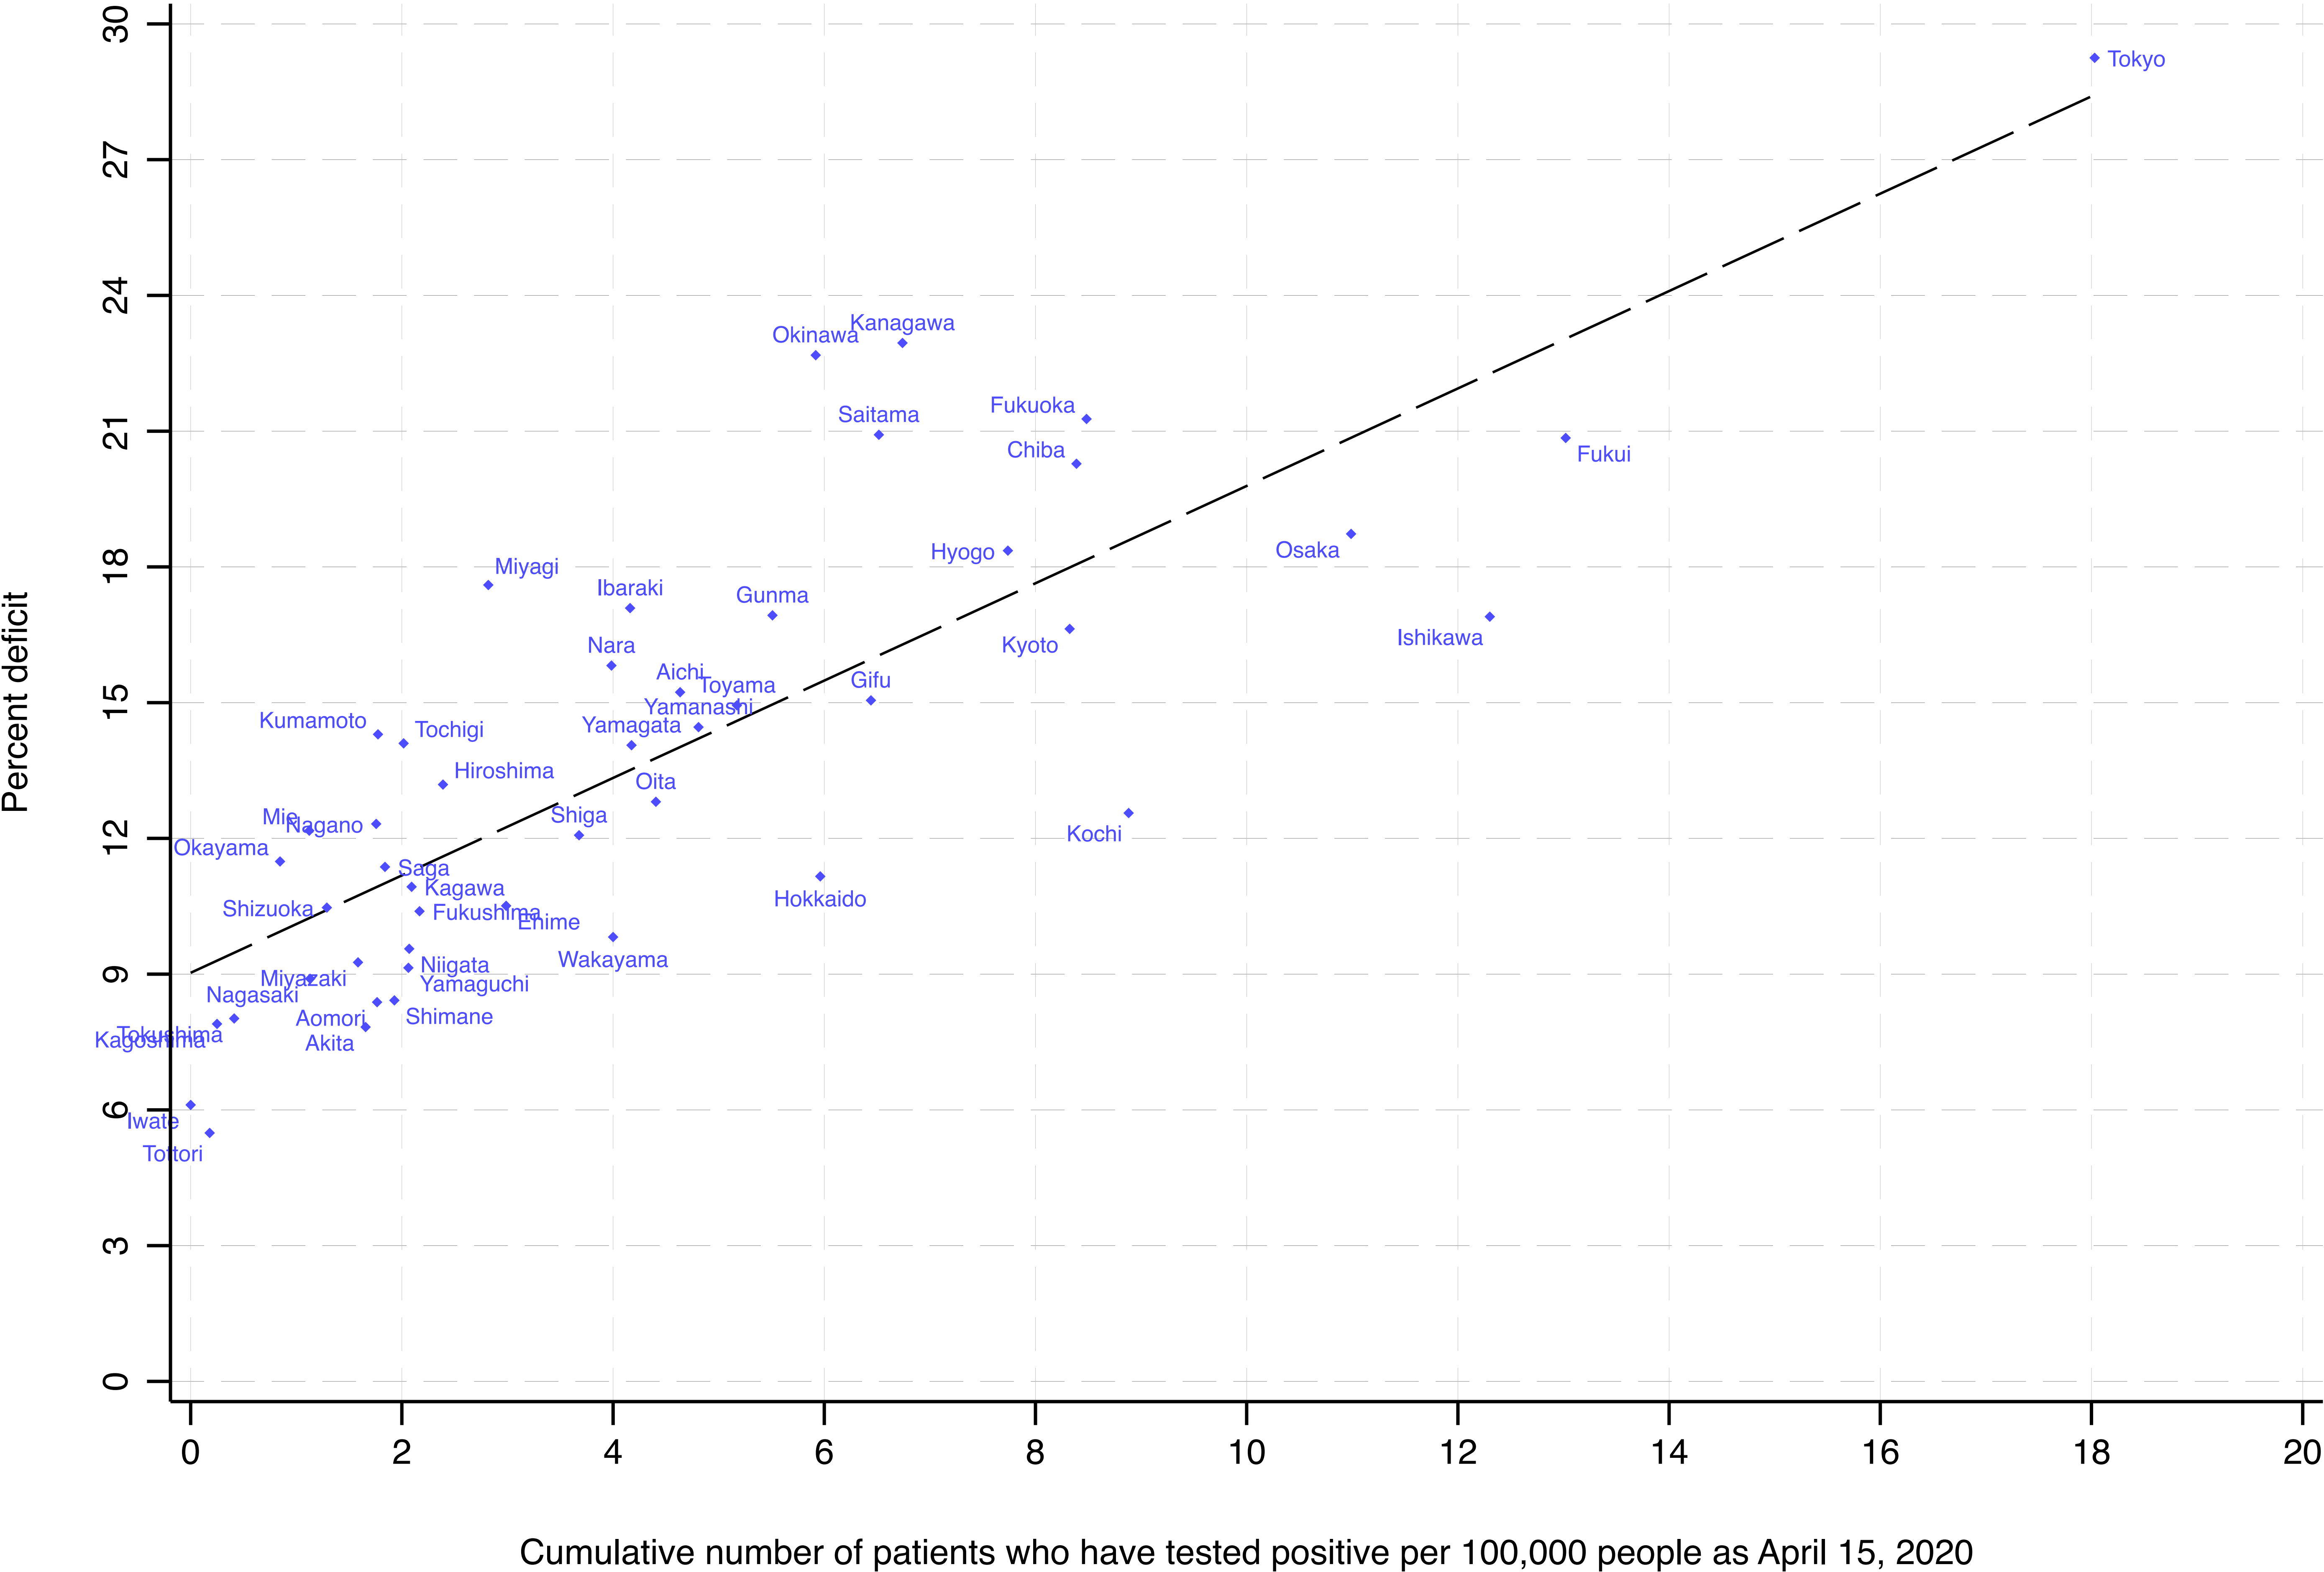

Supplement: s1 [file s1]

Pearson's correlation coefficients = 0.8796

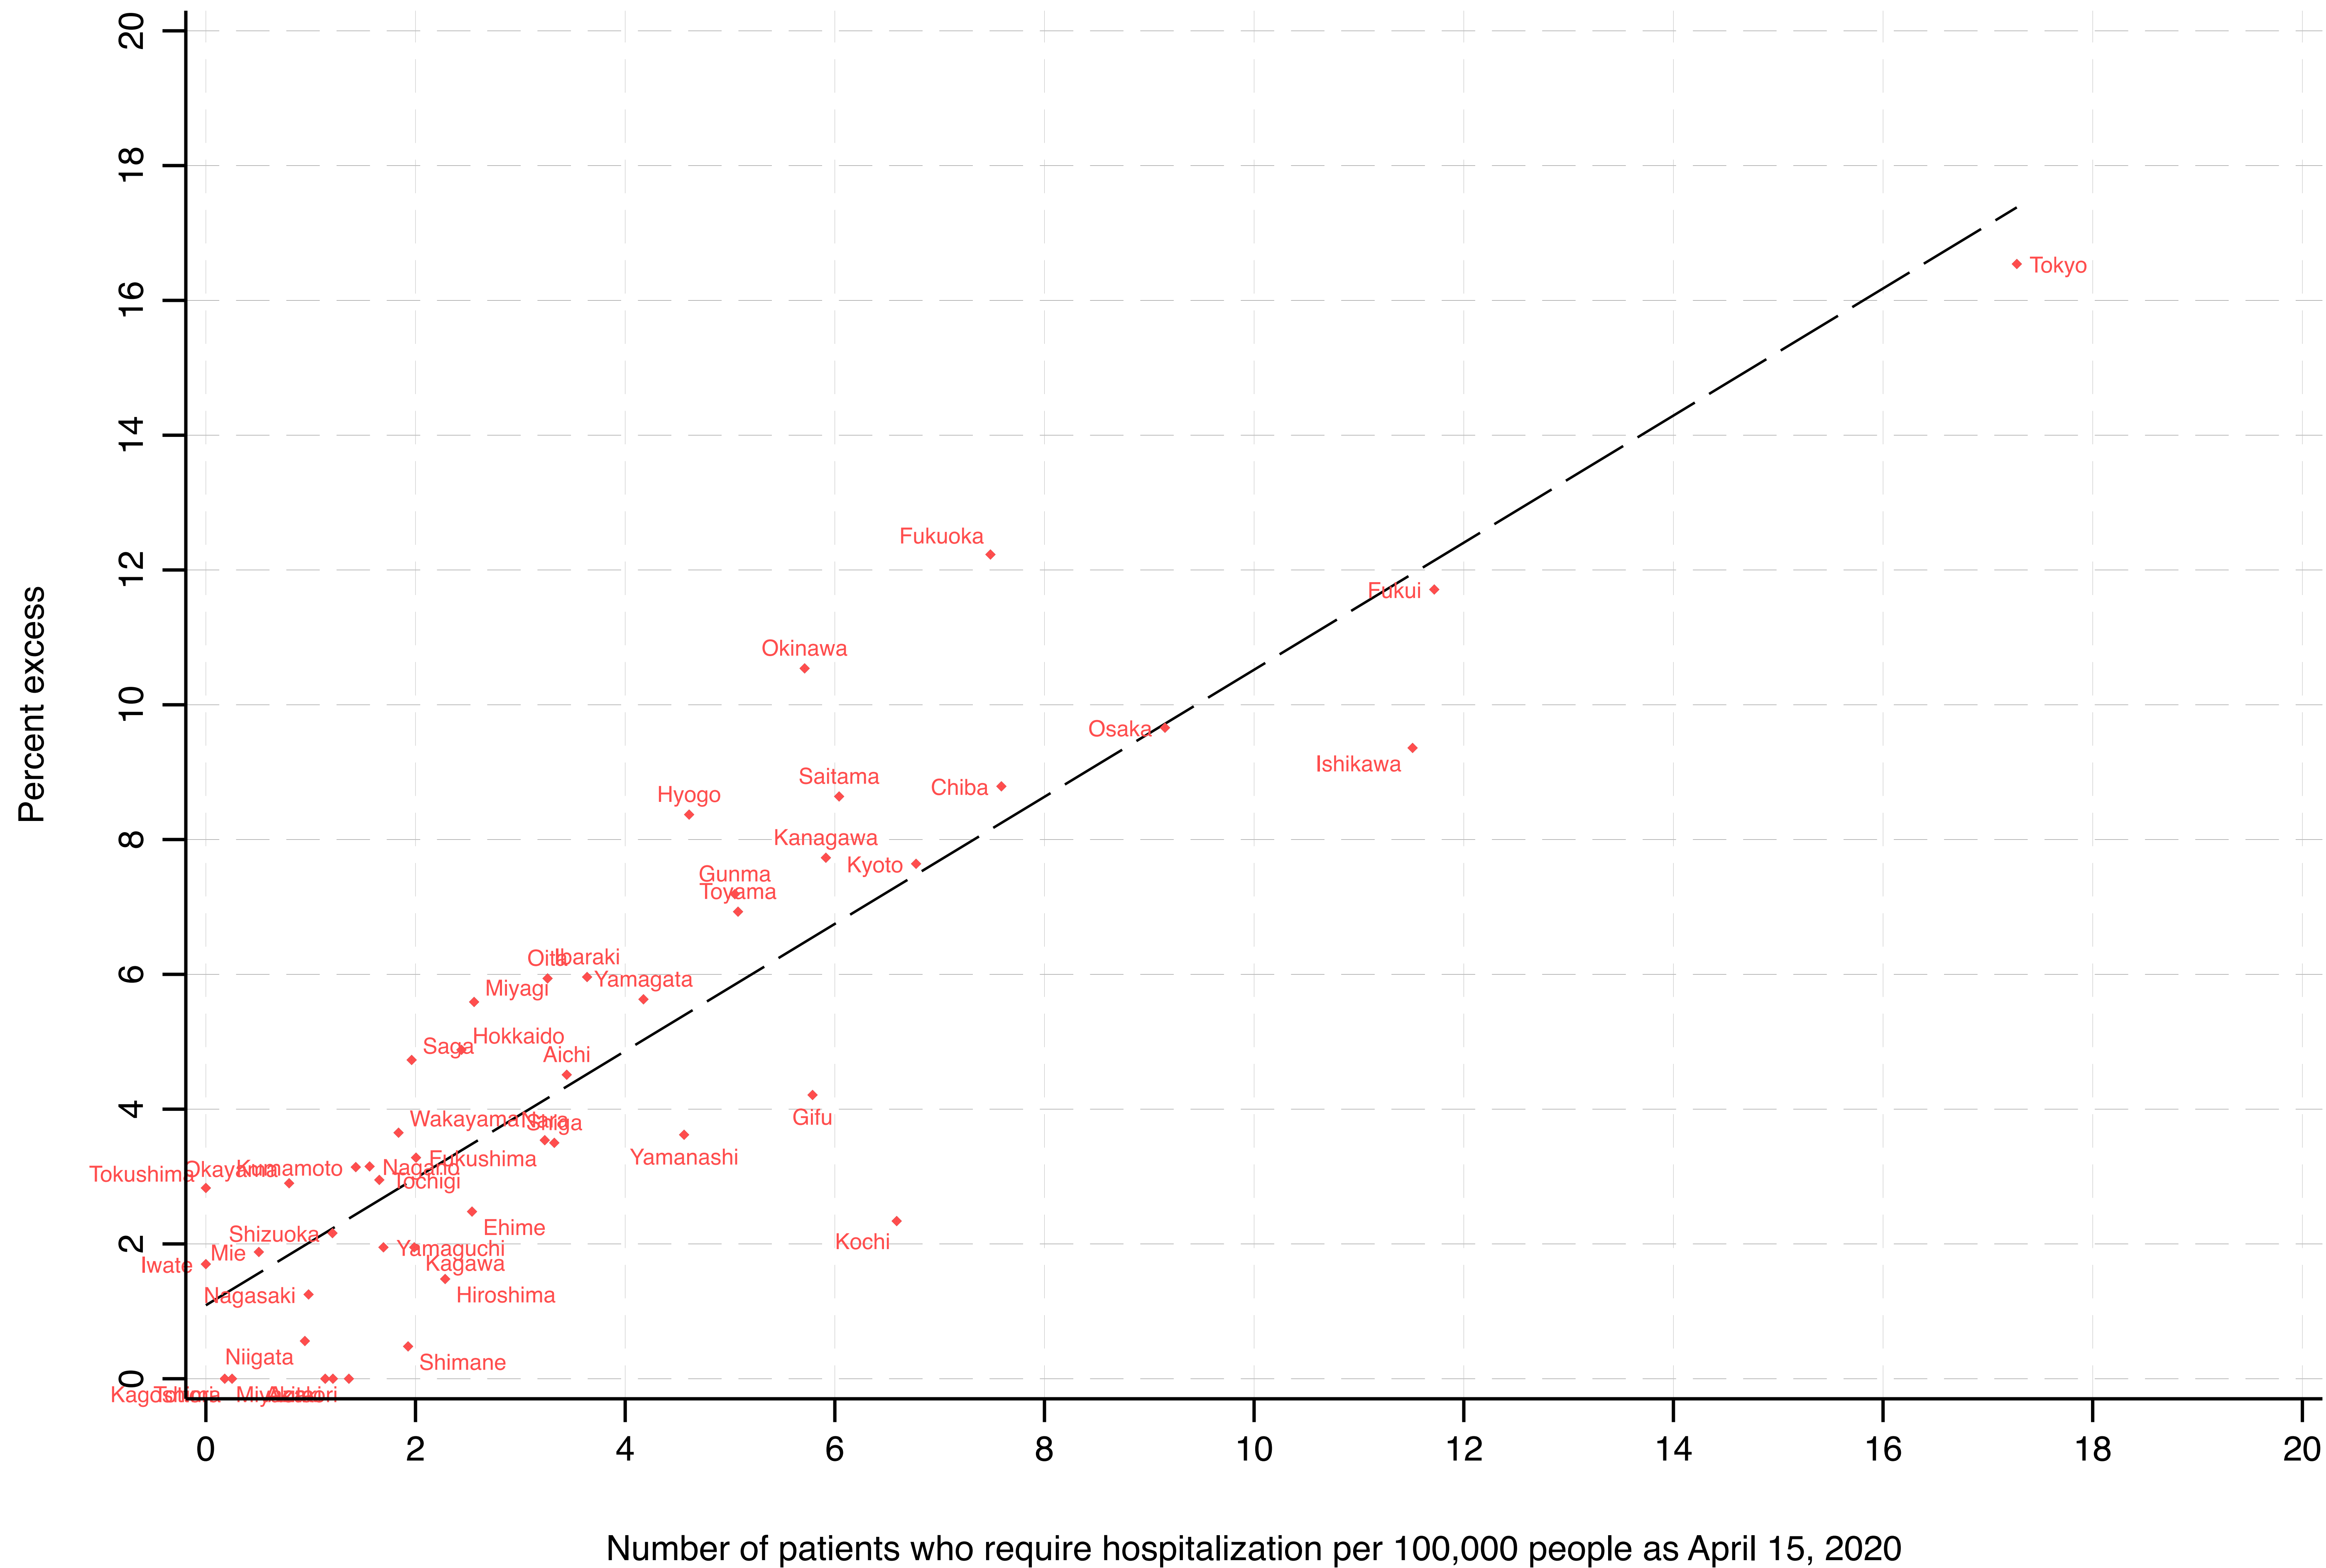

Supplement: s1 [file s1]
